# Supplementary material
Source: PubMed Central journal article supplement (PMC7572484)
Supplement: NIHMS1585777-supplement-1.pdf [file NIHMS1585777-supplement-1.pdf]

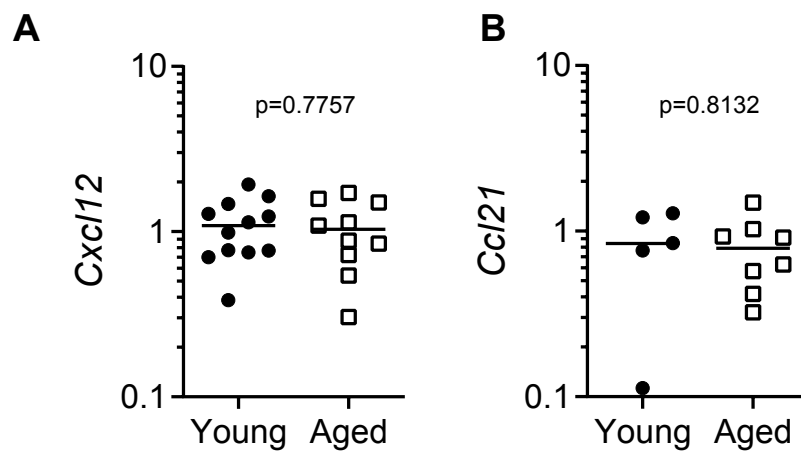

**Fig. S1** *Cxcl12* and *Ccl21* expression are unchanged in bladders from aged mice compared to those from young. **(A)** Relative *Cxcl12* in bladders from young (n=12) and aged (n=10) mice. **(B)** Relative *Ccl21* expression in bladders from young (n=5) and aged (n=8) mice.

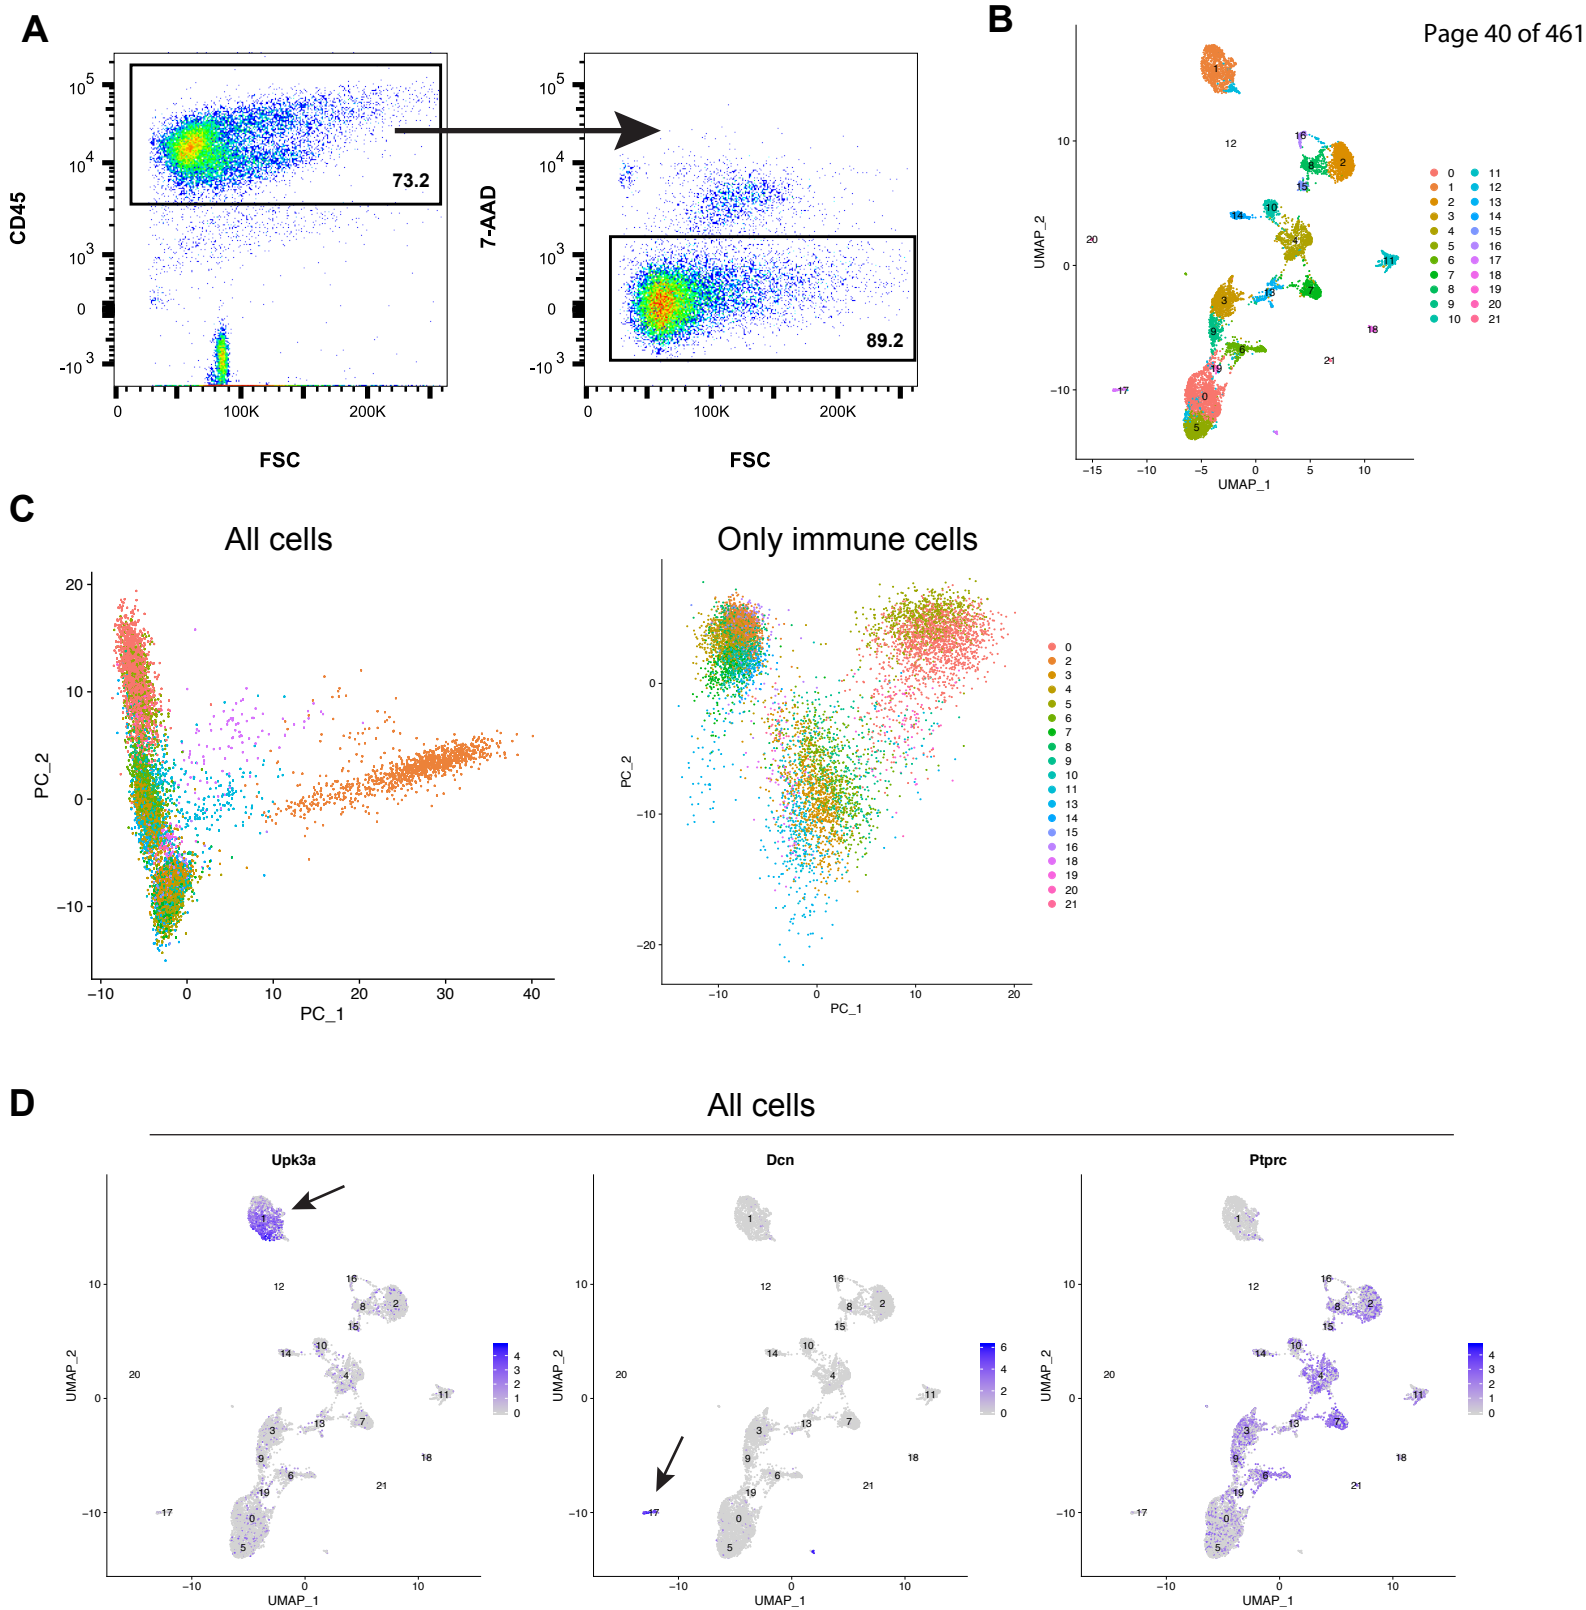

**Figure S2. Isolation and initial analysis of CD45+ cells from young and aged bladders used for scRNA-seq.** (A) Representative flow cytometry plot of the purity (left) and viability (right) of CD45+ cells from magnetic enrichment. (B) UMAP plot of initial clustering analysis of single cells from young and aged bladders. (C) PCA plots of cell clusters from initial analysis (left) and after exclusion of non-immune cells (right). Cluster colors correspond to initial clustering results as in B. (D) Expression of markers for urothelial cells (*Upk3a*, left), stromal cells (*Dcn*, middle), and immune cells (*Ptprc*, left) in the initial clustering analysis. Arrows points to relevant cell clusters.

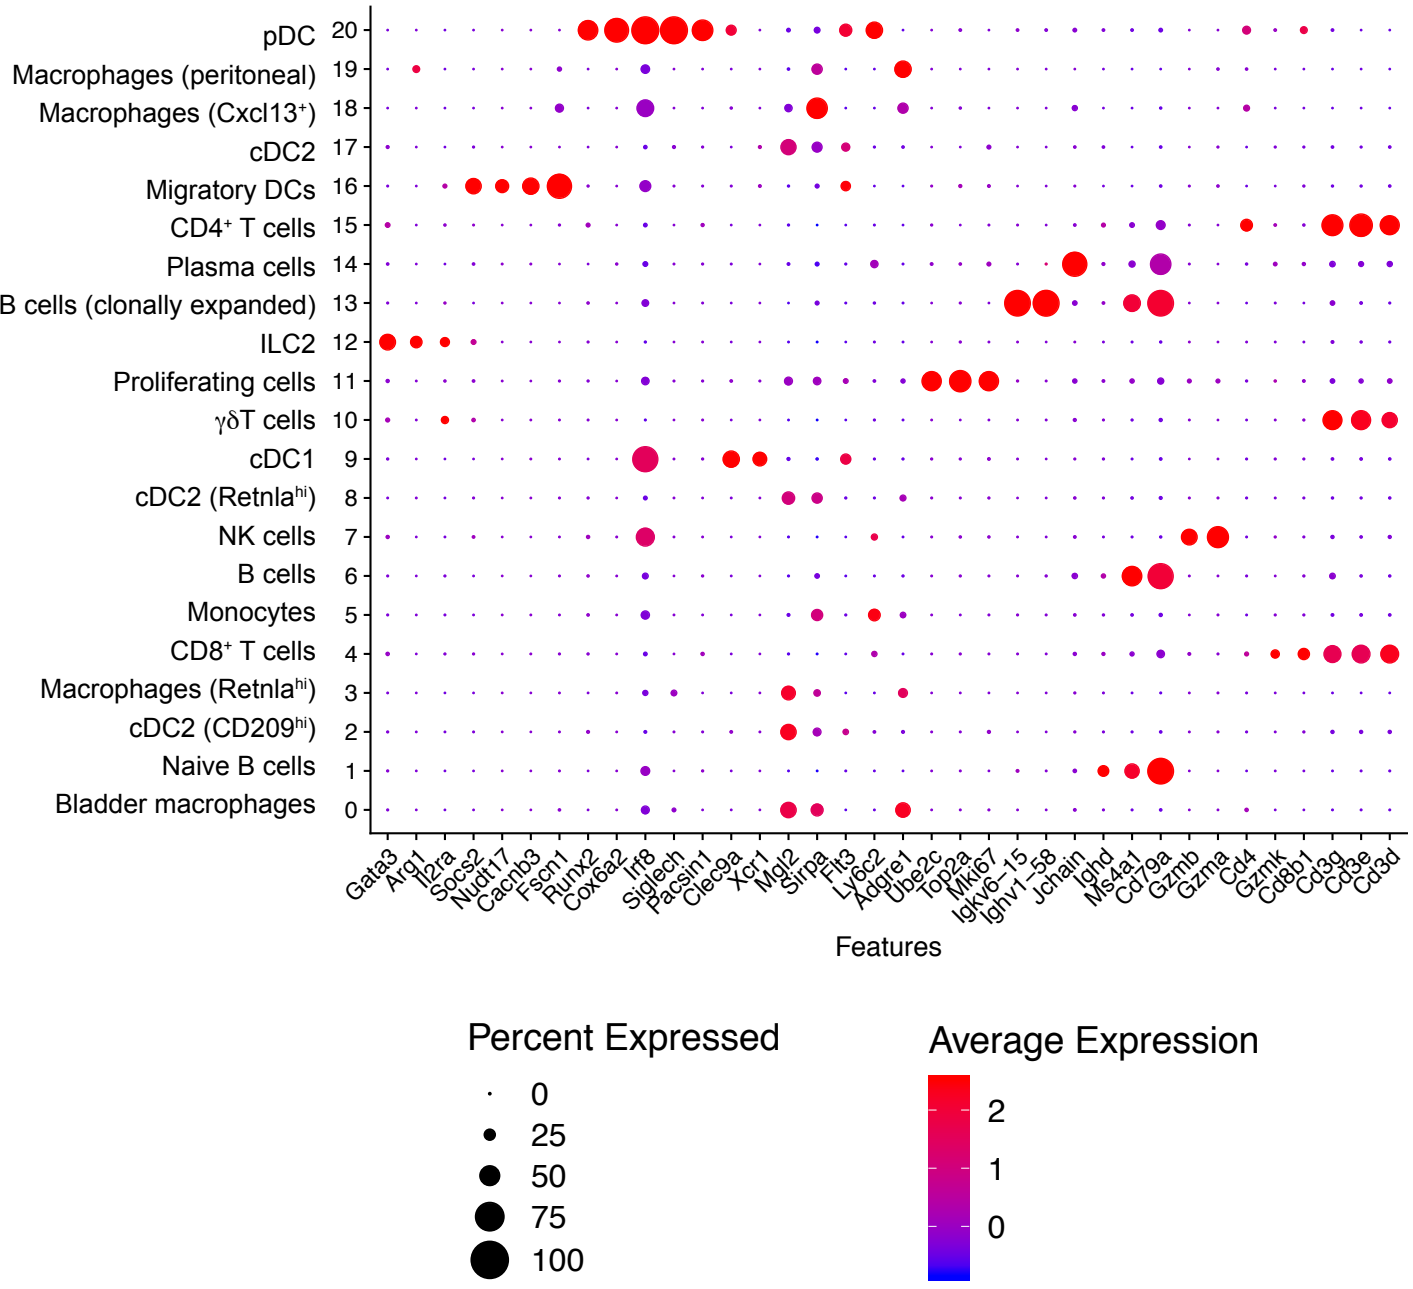

Figure S3. Expression of canonical markers used to identify cluster cell types.

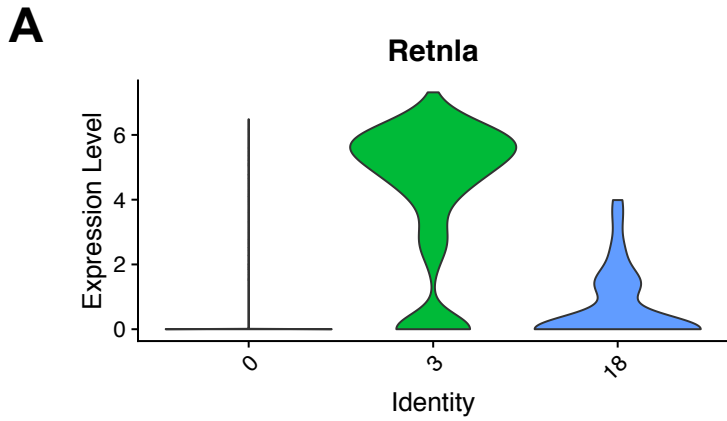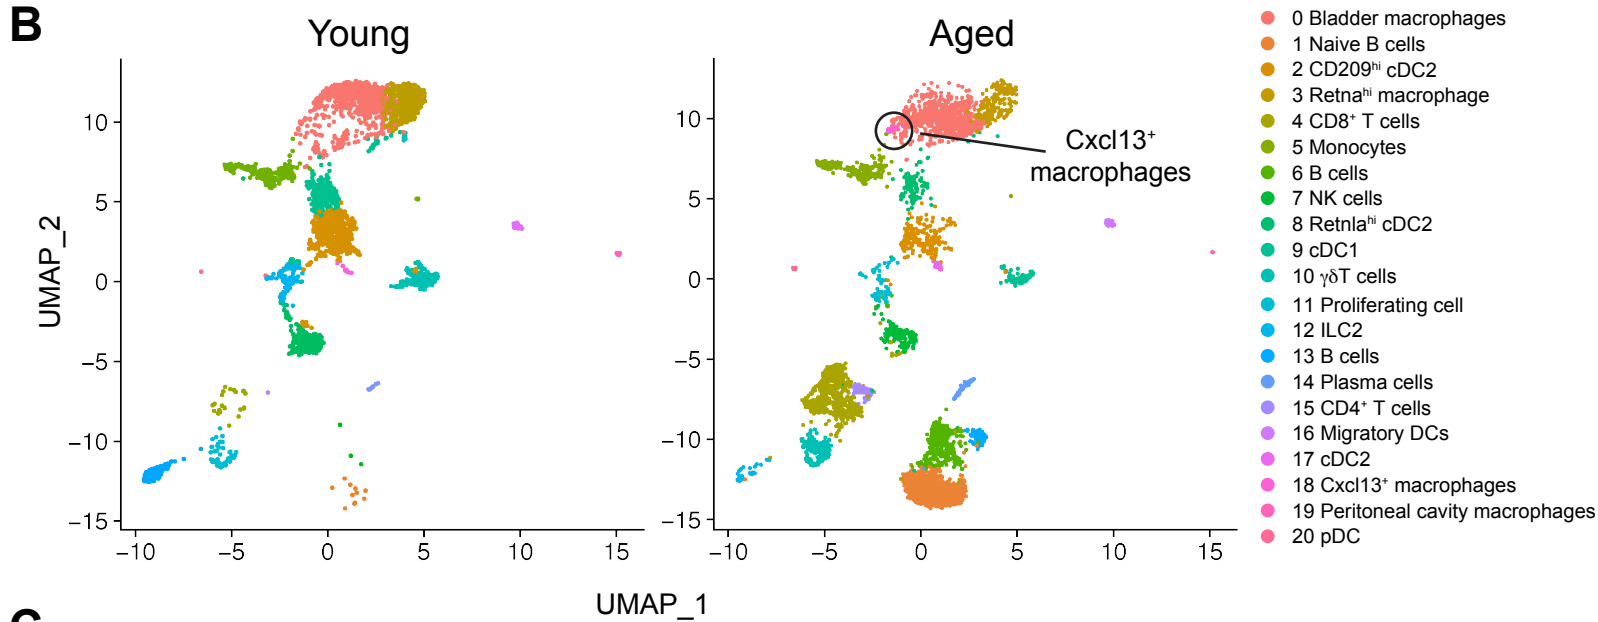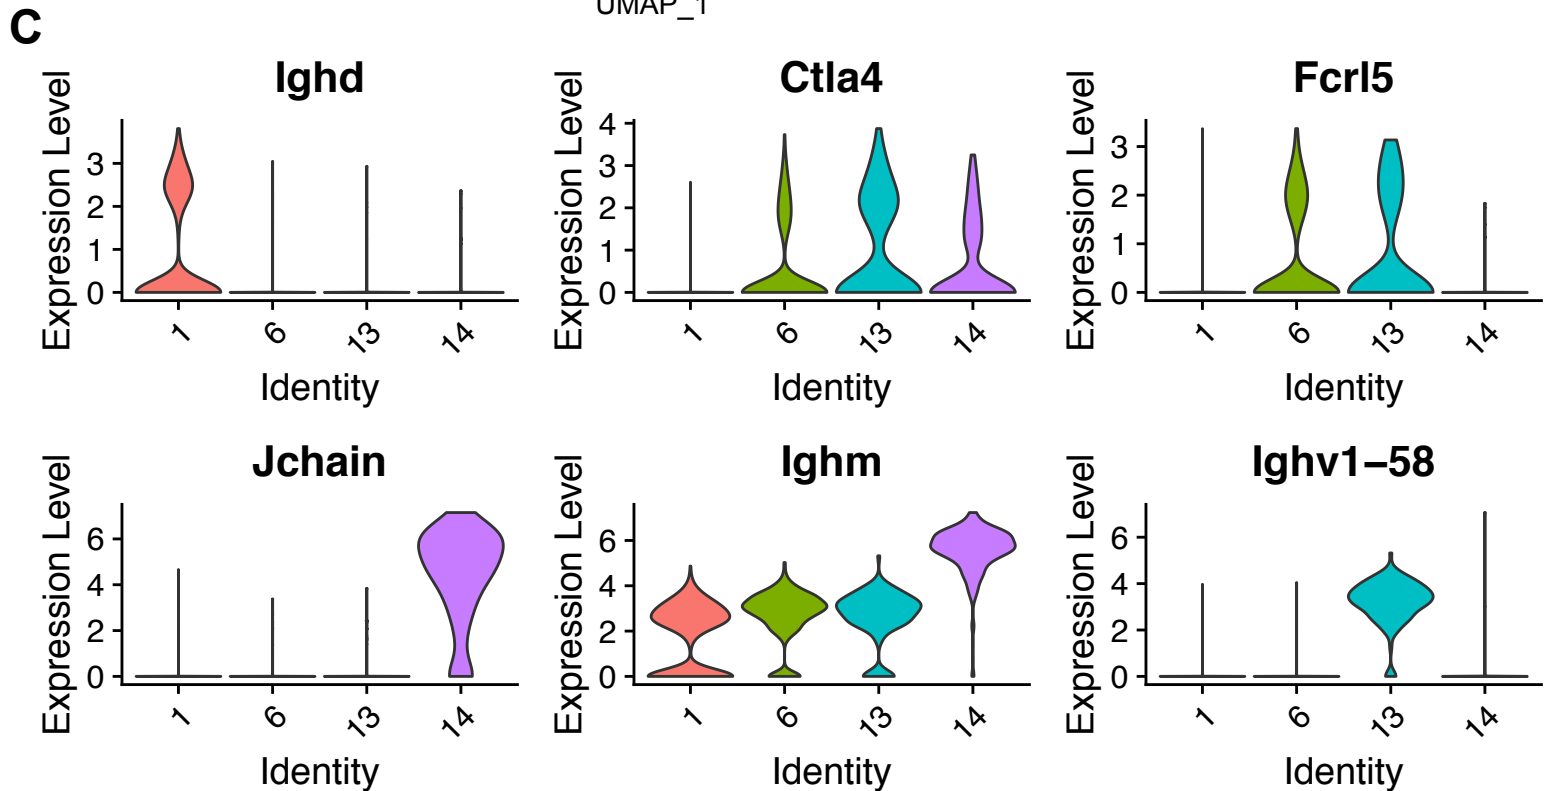

**Figure S4. Aged bladders contain unique macrophages and B cells that are absent in young bladders. (A)** Expression of *Retnla* in macrophage clusters numbered as in main text (Fig. 2A). **(B)** Cell clusters derived from young and aged bladders colored as in main text (Fig. 2A). **(C)** Expression of select genes differentiating B cell-lineage clusters numbered as in main text (Fig. 2A)

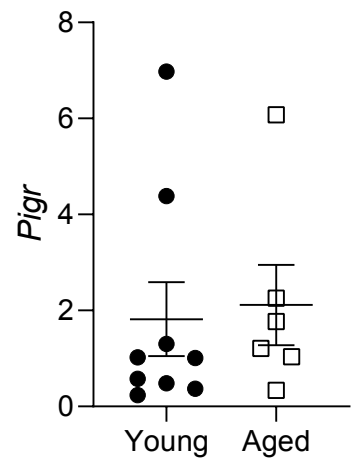

**Figure S5. Polymeric Ig receptor (pIgR) expression does not change in aged bladders.**

| external_gene_name | log2FC    | adj.P.Val |
|--------------------|-----------|-----------|
| Igkv5-39           | 8.8813366 | 0.00351   |
| Ighv1-72           | 8.8007837 | 0.0105    |
| Igkj2              | 8.7599188 | 0.00353   |
| Igkc               | 8.6912604 | 0.00309   |
| Ighv3-6            | 8.6501931 | 0.0284    |
| Ighv1-26           | 8.5147847 | 0.0015    |
| Ighg2b             | 8.2923533 | 0.0403    |
| Igkj1              | 8.0837184 | 0.0471    |
| Igkv4-91           | 8.0087522 | 0.019     |
| Ighv9-3            | 7.9084023 | 0.00863   |
| Igkj5              | 7.8617158 | 0.00796   |
| Igkv6-20           | 7.7534837 | 0.000853  |
| Ighv1-52           | 7.6841908 | 0.0047    |
| Jchain             | 7.6790537 | 0.00441   |
| Ighv1-55           | 7.6069486 | 0.0305    |
| Ighm               | 7.5258855 | 0.00068   |
| Mzb1               | 7.4874908 | 0.0369    |
| Igha               | 7.4395241 | 0.00441   |
| Ighj4              | 7.3941564 | 0.0178    |
| Igkv4-55           | 7.3791455 | 0.0291    |
| Igkj4              | 7.3248342 | 0.0251    |
| Ighj3              | 7.2279758 | 0.0125    |
| Igkv6-15           | 7.0559714 | 0.00068   |
| Ighv5-17           | 7.0533394 | 0.00163   |
| Igkv12-46          | 7.0295755 | 0.000508  |
| Ighv1-54           | 6.9105553 | 0.0119    |
| Igkv1-110          | 6.7983054 | 0.0015    |
| Ighj1              | 6.7928912 | 0.0322    |
| Igkv6-17           | 6.7844217 | 0.0000995 |
| Ighv14-4           | 6.7433245 | 0.00381   |
| Igkv17-121         | 6.671     | 0.00217   |
| Ighv14-2           | 6.6236464 | 0.000508  |
| Igkv16-104         | 6.5651756 | 0.00208   |
| Ighv1-18           | 6.5194145 | 0.00723   |
| Ighv7-3            | 6.4849499 | 0.00526   |
| Ighj2              | 6.4359697 | 0.00445   |
| Igkv3-12           | 6.4232714 | 0.00143   |
| Ighv6-3            | 6.2129207 | 0.00212   |
| Igkv9-120          | 6.1968674 | 0.0101    |
| Iglv3              | 6.0027237 | 0.00826   |
| Iglc2              | 5.8797035 | 0.0342    |
| Igkv1-135          | 5.4876922 | 0.00351   |
| H2-M2              | 4.7841486 | 0.00772   |
| Blk                | 4.6250679 | 0.0334    |
| Gpr174             | 4.5626384 | 0.0226    |

|           |           |         |
|-----------|-----------|---------|
| Serpina3f | 4.4145682 | 0.00795 |
| Slamf6    | 4.3903404 | 0.0279  |
| Cd3d      | 4.3857274 | 0.00266 |
| Prg2      | 4.3553355 | 0.00564 |
| Cxcl13    | 4.1573853 | 0.0125  |
| Gpr55     | 4.1368901 | 0.0112  |
| Ltb       | 4.0932467 | 0.0238  |
| Lat       | 4.0228361 | 0.00293 |
| Cd3g      | 3.9037042 | 0.00485 |
| Ccl8      | 3.831428  | 0.00922 |
| Gimap7    | 3.8206487 | 0.0095  |
| Dnase1l3  | 3.6827184 | 0.00513 |
| Ly6c2     | 3.6614257 | 0.0105  |
| Trbc2     | 3.6397431 | 0.0142  |
| Cd5       | 3.5868987 | 0.00749 |
| Cd6       | 3.5835442 | 0.00839 |
| Zfp831    | 3.5601086 | 0.0295  |
| Ccr7      | 3.4859135 | 0.0226  |
| Cd3e      | 3.4509355 | 0.00167 |
| Pdcd1     | 3.3734761 | 0.0424  |
| Zc3h12d   | 3.3106018 | 0.0116  |
| Cxcl9     | 3.2171755 | 0.0116  |
| Cd2       | 3.2117235 | 0.0295  |
| Cacna1e   | 3.1784358 | 0.0238  |
| Cd96      | 3.0649443 | 0.00266 |
| Gimap3    | 3.0510773 | 0.00723 |
| Lax1      | 3.0464585 | 0.0186  |
| Ms4a4b    | 3.0139305 | 0.0052  |
| Tnfsf8    | 2.9213082 | 0.0161  |
| P2ry10    | 2.8990045 | 0.0291  |
| Ptpn22    | 2.8690282 | 0.0149  |
| Themis    | 2.8678195 | 0.00309 |
| Kynu      | 2.862195  | 0.0309  |
| Tnf       | 2.8462852 | 0.00351 |
| Tspan32   | 2.8220526 | 0.012   |
| Cd247     | 2.8186509 | 0.0047  |
| Tnfrsf13b | 2.8013627 | 0.0226  |
| Cd52      | 2.7522877 | 0.0125  |
| Il7r      | 2.7461342 | 0.00213 |
| Derl3     | 2.7408468 | 0.0328  |
| Ly9       | 2.6944655 | 0.00923 |
| Fcgr4     | 2.6802147 | 0.0166  |
| Rhoh      | 2.6777063 | 0.0493  |
| Acap1     | 2.6615527 | 0.0241  |
| Traf3ip3  | 2.6396443 | 0.0307  |
| Parvg     | 2.6135904 | 0.0185  |

|            |       |           |          |
|------------|-------|-----------|----------|
| Ffar2      |       | 2.5604715 | 0.0122   |
| Lck        |       | 2.5572678 | 0.0235   |
| Cxcr3      |       | 2.5135821 | 0.00591  |
| AC133103.1 |       | 2.5055944 | 0.000508 |
| H2-Oa      |       | 2.501198  | 0.0455   |
| Rasal3     |       | 2.4797177 | 0.0136   |
| Spn        |       | 2.4719676 | 0.0071   |
| Clec2i     |       | 2.4584265 | 0.019    |
| E2f2       |       | 2.4574448 | 0.0187   |
| Itgal      |       | 2.4203054 | 0.00428  |
| Cxcl10     |       | 2.4199982 | 0.00573  |
| Rac2       |       | 2.4148082 | 0.0138   |
| Zap70      |       | 2.4107938 | 0.0183   |
| Apol7c     |       | 2.3906983 | 0.00208  |
| Cd163l1    |       | 2.3788437 | 0.00939  |
|            | 44075 | 2.3743116 | 0.0137   |
| Il2rg      |       | 2.3631757 | 0.0105   |
| Lin28b     |       | 2.3515634 | 0.00266  |
| Itk        |       | 2.3211252 | 0.00751  |
| Cd4        |       | 2.3206468 | 0.00853  |
| Il21r      |       | 2.3060993 | 0.0186   |
| Stat4      |       | 2.3014569 | 0.0238   |
| Ttn        |       | 2.2824255 | 0.013    |
| Tlr1       |       | 2.2610584 | 0.0118   |
| Runx3      |       | 2.2408696 | 0.00863  |
| Gm4759     |       | 2.1907777 | 0.0283   |
| Kcna3      |       | 2.173755  | 0.0139   |
| Ripor2     |       | 2.1561728 | 0.0445   |
| Pou2f2     |       | 2.154611  | 0.00647  |
| Hist1h3c   |       | 2.1518564 | 0.0371   |
| Cxcr4      |       | 2.1488816 | 0.0271   |
| Rit1       |       | 2.1417267 | 0.0033   |
| Rasgrp1    |       | 2.1384606 | 0.00599  |
| Coro1a     |       | 2.1369605 | 0.00968  |
| Trpm2      |       | 2.1302521 | 0.0109   |
| Lat2       |       | 2.1249703 | 0.0102   |
| Hcst       |       | 2.1212823 | 0.00656  |
| Cd180      |       | 2.1199523 | 0.0123   |
| Fgr        |       | 2.1174655 | 0.00213  |
| Fam169b    |       | 2.1066825 | 0.0223   |
| H2-Q7      |       | 2.1029251 | 0.00255  |
| H2-Q7      |       | 2.1029251 | 0.00255  |
| Tnfsf14    |       | 2.0987367 | 0.00538  |
| Cxcr6      |       | 2.0982376 | 0.000714 |
| Ptprc      |       | 2.0835303 | 0.00573  |
| Nkg7       |       | 2.0742469 | 0.00341  |



|               |           |         |
|---------------|-----------|---------|
| Napsa         | 2.0721189 | 0.0396  |
| Tbx21         | 2.0718693 | 0.00627 |
| AI504432      | 2.0703679 | 0.0101  |
| Sash3         | 2.0691464 | 0.0207  |
| Pla2g2d       | 2.0599991 | 0.00255 |
| Ifi209        | 2.0552105 | 0.0212  |
| Cyp4f18       | 2.0511528 | 0.0262  |
| Ms4a4c        | 2.0507489 | 0.027   |
| Samsn1        | 2.0441429 | 0.0145  |
| Slamf8        | 2.0344584 | 0.00931 |
| 5830411N06Rik | 2.0263657 | 0.0068  |
| Icos          | 2.0131701 | 0.00777 |
| Cd101         | 2.0023969 | 0.00351 |
| H2-T-ps       | 1.9815854 | 0.00618 |
| Tmem28        | 1.9712181 | 0.00286 |
| Dok3          | 1.9562772 | 0.0283  |
| Mcoln2        | 1.9530673 | 0.00266 |
| Podnl1        | 1.9510553 | 0.00213 |
| Ikzf1         | 1.9487629 | 0.0177  |
| AI662270      | 1.9472436 | 0.0184  |
| Stap1         | 1.9431013 | 0.0445  |
| Irf4          | 1.9378485 | 0.0224  |
| Slc28a2       | 1.9357467 | 0.0153  |
| H2-Q5         | 1.9300449 | 0.00239 |
| Gm1966        | 1.9243536 | 0.0113  |
| Rnase6        | 1.9062611 | 0.0173  |
| Slamf7        | 1.8900406 | 0.00423 |
| Cd53          | 1.873887  | 0.00777 |
| Cytip         | 1.8720936 | 0.0367  |
| Gbp8          | 1.8706982 | 0.00428 |
| Clec7a        | 1.8665531 | 0.0195  |
| Grap2         | 1.8629998 | 0.0149  |
| Ciita         | 1.8607175 | 0.00801 |
| H2-Q6         | 1.8497653 | 0.00266 |
| Serpina3g     | 1.848992  | 0.0162  |
| Car8          | 1.8483426 | 0.00137 |
| Bub1          | 1.8373502 | 0.0162  |
| Lcp2          | 1.8292684 | 0.00299 |
| Lair1         | 1.8215534 | 0.0135  |
| Il12rb1       | 1.8173005 | 0.00428 |
| Il27ra        | 1.8096766 | 0.0279  |
| Il2rb         | 1.8022078 | 0.00573 |
| Ifit1bl1      | 1.7541318 | 0.0095  |
| Padi1         | 1.7496522 | 0.00102 |
| Traf1         | 1.7389391 | 0.0147  |
| Ncf4          | 1.7341511 | 0.0122  |

|           |           |         |
|-----------|-----------|---------|
| Arhgap4   | 1.7282262 | 0.0239  |
| Dock2     | 1.7274009 | 0.0038  |
| Gm12185   | 1.7203098 | 0.0145  |
| Ctss      | 1.7111113 | 0.00309 |
| Syk       | 1.7077492 | 0.0125  |
| Hist1h2bl | 1.702634  | 0.0161  |
| Cd83      | 1.7009363 | 0.00804 |
| Lpxn      | 1.6910318 | 0.012   |
| Ptprz1    | 1.6864605 | 0.0105  |
| Ptpn7     | 1.6807404 | 0.00309 |
| Susd3     | 1.6734323 | 0.00689 |
| Anks1b    | 1.6726322 | 0.0195  |
| Gpr65     | 1.6700436 | 0.00723 |
| Serpinb9b | 1.6665074 | 0.00415 |
| Ccnb2     | 1.6599166 | 0.0309  |
| Slco1a4   | 1.6561958 | 0.00217 |
| Rgs14     | 1.6493831 | 0.0194  |
| Zbp1      | 1.6454581 | 0.00863 |
| Gpr132    | 1.6431573 | 0.00286 |
| Terc      | 1.64175   | 0.00602 |
| Vav1      | 1.6355044 | 0.0232  |
| Gm22513   | 1.6340008 | 0.0174  |
| Il23r     | 1.6328489 | 0.00574 |
| Hvcn1     | 1.6271747 | 0.0331  |
| Cybb      | 1.6166454 | 0.00381 |
| Mki67     | 1.6107185 | 0.0216  |
| Arhgap15  | 1.6102846 | 0.00848 |
| Phf11b    | 1.6055425 | 0.00351 |
| Bin2      | 1.5958754 | 0.0489  |
| Tmprss6   | 1.5871548 | 0.0021  |
| Nexmif    | 1.5830144 | 0.00137 |
| Bhlha15   | 1.571443  | 0.014   |
| Slain1    | 1.5640129 | 0.0489  |
| Hck       | 1.5524145 | 0.003   |
| Snx20     | 1.5391033 | 0.00743 |
| Esm1      | 1.5370842 | 0.012   |
| Reg3g     | 1.531259  | 0.00824 |
| Sla       | 1.5271664 | 0.0145  |
| Scml4     | 1.5264082 | 0.0259  |
| Sla2      | 1.5256115 | 0.0144  |
| Lrmp      | 1.5242017 | 0.0333  |
| Cd274     | 1.523923  | 0.0105  |
| Csf3r     | 1.521779  | 0.0461  |
| Psemb9    | 1.5165579 | 0.00213 |
| Cdh8      | 1.5135518 | 0.0049  |
| Ly86      | 1.5132929 | 0.0151  |

|          |           |         |
|----------|-----------|---------|
| Selplg   | 1.5092213 | 0.00215 |
| Gimap4   | 1.5080051 | 0.0326  |
| B4galnt1 | 1.5038358 | 0.0183  |
| Hs3st3b1 | 1.4962371 | 0.00777 |
| Nek2     | 1.4944195 | 0.0458  |
| Ifi213   | 1.4908163 | 0.0224  |
| Myo3b    | 1.485125  | 0.00821 |
| Hcls1    | 1.4730916 | 0.00796 |
| Asf1b    | 1.4728995 | 0.0118  |
| Slc15a3  | 1.4712498 | 0.00647 |
| Btk      | 1.4640327 | 0.0126  |
| Cd84     | 1.4627572 | 0.00999 |
| Plek     | 1.4615204 | 0.00417 |
| Rinl     | 1.4598382 | 0.00271 |
| Arl5c    | 1.4582507 | 0.0169  |
| Kif21b   | 1.4572071 | 0.0119  |
| Hist1h3a | 1.4548194 | 0.0364  |
| Cd48     | 1.4538537 | 0.0124  |
| Was      | 1.4530466 | 0.0206  |
| AB124611 | 1.4380345 | 0.00884 |
| Cd300c2  | 1.4377285 | 0.00423 |
| Ncapg    | 1.4318511 | 0.0397  |
| S1pr4    | 1.4286819 | 0.0258  |
| H2-DMa   | 1.4214553 | 0.00415 |
| Cd226    | 1.4180816 | 0.00782 |
| Epsti1   | 1.4154617 | 0.00266 |
| Itgb2    | 1.4119727 | 0.00263 |
| Kif11    | 1.4093629 | 0.0243  |
| Ctsw     | 1.4061695 | 0.0126  |
| Tnfrsf18 | 1.3996102 | 0.0127  |
| Aif1     | 1.3955293 | 0.0142  |
| H2-Eb1   | 1.3914174 | 0.00213 |
| Adgrg5   | 1.3891996 | 0.0206  |
| Mcemp1   | 1.3879978 | 0.00503 |
| Kcnab2   | 1.38736   | 0.0139  |
| Lag3     | 1.3865526 | 0.0295  |
| Xcr1     | 1.3863456 | 0.0235  |
| Nup210   | 1.3854759 | 0.0105  |
| Nxph1    | 1.3801396 | 0.00751 |
| Ccl7     | 1.3722216 | 0.0499  |
| Cd74     | 1.371005  | 0.00286 |
| Cdca3    | 1.3631608 | 0.0147  |
| H2-Aa    | 1.3620377 | 0.00239 |
| Wdfy4    | 1.3588973 | 0.006   |
| St8sia4  | 1.3575307 | 0.0102  |
| Ptptr    | 1.3509917 | 0.00239 |

|               |           |         |
|---------------|-----------|---------|
| Evi2a         | 1.3508194 | 0.00428 |
| Aurkb         | 1.347505  | 0.0452  |
| Gm8995        | 1.3471076 | 0.00351 |
| Pik3ap1       | 1.34697   | 0.00923 |
|               | 43891     |         |
| Dusp2         | 1.3348754 | 0.0315  |
| Dusp2         | 1.3346551 | 0.0489  |
| Oasl1         | 1.3339477 | 0.0231  |
| Ptpn6         | 1.3258135 | 0.0105  |
| Themis2       | 1.3222882 | 0.0159  |
| Nckap1l       | 1.3206827 | 0.0077  |
| H2-Ab1        | 1.317529  | 0.00242 |
| Fam167a       | 1.3143061 | 0.0241  |
| Krt23         | 1.3139011 | 0.00662 |
| Ptpn18        | 1.3115725 | 0.00647 |
| Laptn5        | 1.3102159 | 0.00646 |
| Ifi47         | 1.3055942 | 0.0147  |
| Adgre4        | 1.3022513 | 0.0139  |
| Nxpe5         | 1.3021564 | 0.0204  |
| AC168977.1    | 1.3008853 | 0.0189  |
| C130021I20Rik | 1.2989023 | 0.00351 |
| Plxnc1        | 1.2954846 | 0.00381 |
| Itgb7         | 1.2954125 | 0.00433 |
| Cabp7         | 1.2947861 | 0.00429 |
| Cyp8b1        | 1.2816199 | 0.0151  |
| Galnt5        | 1.2811246 | 0.0181  |
| Casp1         | 1.2780159 | 0.00839 |
| Pcdhb9        | 1.2684926 | 0.00453 |
| Itgax         | 1.2659379 | 0.00366 |
| C130026I21Rik | 1.260353  | 0.00428 |
| Grap          | 1.2600255 | 0.0348  |
| Hist1h4f      | 1.2599845 | 0.026   |
| Kif22         | 1.2599498 | 0.0135  |
| Clec12a       | 1.2534917 | 0.0462  |
| Prdm1         | 1.24594   | 0.00889 |
| Wfdc17        | 1.2439741 | 0.0497  |
| Car12         | 1.2333133 | 0.0137  |
| Nlrc5         | 1.2314905 | 0.00217 |
| Grik1         | 1.2307654 | 0.00817 |
| Sema4f        | 1.2268668 | 0.00646 |
| Il13ra2       | 1.2156653 | 0.00208 |
| Lyz2          | 1.215355  | 0.01    |
| Ccr5          | 1.2151657 | 0.0427  |
| Aim2          | 1.211504  | 0.0115  |
| Dnaaf3        | 1.2076543 | 0.0343  |
| Ms4a6b        | 1.2069563 | 0.018   |
| Sema4d        | 1.2066828 | 0.00686 |

|           |           |         |
|-----------|-----------|---------|
| H2-T10    | 1.2040094 | 0.0225  |
| Stra6     | 1.2020953 | 0.0455  |
| Pik3r5    | 1.2016844 | 0.00353 |
| Rorb      | 1.2015758 | 0.00564 |
| Cd80      | 1.1998966 | 0.0142  |
| Faim2     | 1.1981455 | 0.00955 |
| Tlr9      | 1.1972471 | 0.0454  |
| Klrd1     | 1.1926272 | 0.0265  |
| AW112010  | 1.1901763 | 0.00804 |
| Myo1g     | 1.1887227 | 0.00647 |
| Nmur2     | 1.1872507 | 0.0427  |
| Apol9a    | 1.1815024 | 0.0477  |
| Pld4      | 1.1790609 | 0.00767 |
| Arnt2     | 1.1785512 | 0.00722 |
| Fam46c    | 1.1777844 | 0.0295  |
| Hist1h2ai | 1.1752143 | 0.0424  |
| Fmnl1     | 1.1740934 | 0.00687 |
| Mpeg1     | 1.1740358 | 0.00915 |
| Ap3b2     | 1.1711156 | 0.00351 |
| Pirb      | 1.1633251 | 0.017   |
| Arhgap45  | 1.1630886 | 0.0253  |
| Limd2     | 1.1626252 | 0.0113  |
| Hepacam2  | 1.1584846 | 0.0412  |
| Il10ra    | 1.156242  | 0.00423 |
| Psmb8     | 1.1558701 | 0.00455 |
| Cd40      | 1.1542889 | 0.0439  |
| Il18rap   | 1.1521411 | 0.0109  |
| Nup62cl   | 1.1514398 | 0.00154 |
| Tap1      | 1.1502399 | 0.00528 |
| Rgn       | 1.1500573 | 0.0452  |
| Cdca8     | 1.1493153 | 0.0449  |
| Blnk      | 1.1480054 | 0.0229  |
| Akna      | 1.14755   | 0.0134  |
| Kif15     | 1.1468814 | 0.0208  |
| Ifi30     | 1.144509  | 0.00449 |
| Myo1f     | 1.144137  | 0.00591 |
| Havcr2    | 1.1399709 | 0.00619 |
| Pacsin1   | 1.1387311 | 0.0393  |
| C4b       | 1.1386947 | 0.00255 |
| Srgn      | 1.1381087 | 0.00564 |
| Il7       | 1.1353994 | 0.00351 |
| Ikzf3     | 1.1295665 | 0.0164  |
| Ccdc88b   | 1.1287825 | 0.0111  |
| Bco2      | 1.1269473 | 0.0231  |
| Trim5     | 1.1257137 | 0.0185  |
| Arhgap25  | 1.1232868 | 0.0493  |

|           |           |          |
|-----------|-----------|----------|
| Greb1     | 1.1203819 | 0.0191   |
| Upb1      | 1.1165443 | 0.0068   |
| Relt      | 1.115317  | 0.0189   |
| Hist1h2bb | 1.1073473 | 0.0458   |
| Mmp3      | 1.1052216 | 0.0396   |
| BC035044  | 1.100089  | 0.0205   |
| Oas1a     | 1.098718  | 0.0238   |
| Kcnq3     | 1.0981969 | 0.0386   |
| Skap1     | 1.0953046 | 0.0275   |
| Pik3cd    | 1.0899357 | 0.00627  |
| Padi2     | 1.0897421 | 0.00241  |
| Rpgrip1   | 1.0895728 | 0.0495   |
| Lrrc18    | 1.088352  | 0.0258   |
| Cd86      | 1.0879978 | 0.0291   |
| Psrc1     | 1.0876693 | 0.006    |
| Nos2      | 1.0864314 | 0.014    |
| Fermt3    | 1.0848836 | 0.00266  |
| Brca1     | 1.0769344 | 0.00352  |
| Plk1      | 1.0767428 | 0.00739  |
| Slfn8     | 1.0666408 | 0.0146   |
| Tnfaip8l2 | 1.063995  | 0.00965  |
| Lypd8     | 1.0628407 | 0.0247   |
| Arhgap9   | 1.0623737 | 0.00889  |
| Igsf6     | 1.0612519 | 0.0164   |
| Gimap5    | 1.0585743 | 0.0405   |
| Plbd1     | 1.0565932 | 0.0117   |
| Tspan33   | 1.0496629 | 0.0165   |
| Tgm1      | 1.0479632 | 0.0444   |
| B4galnt4  | 1.0479027 | 0.0344   |
| Neto1     | 1.0460026 | 0.0445   |
| Nfkbie    | 1.0430462 | 0.0109   |
| Hap1      | 1.0423584 | 0.0111   |
| Wif1      | 1.039911  | 0.00351  |
| Gmfg      | 1.0355651 | 0.0284   |
| H2-T24    | 1.0355317 | 0.00968  |
| Cd68      | 1.0350452 | 0.00503  |
| Bcl3      | 1.0343179 | 0.048    |
| Ndp       | 1.0309176 | 0.0167   |
| Itga4     | 1.0277607 | 0.00773  |
| Sp140     | 1.026063  | 0.0112   |
| Tox       | 1.0236573 | 0.0314   |
| Adcy8     | 1.0196845 | 0.0224   |
| Padi4     | 1.0153744 | 0.000748 |
| St6gal1   | 1.0130345 | 0.0345   |
| H2-DMb1   | 1.0108097 | 0.00213  |
| Crabp2    | 1.0080385 | 0.00839  |

|          |            |         |
|----------|------------|---------|
| Asb16    | 1.0077059  | 0.0125  |
| Il18bp   | 1.0058759  | 0.0207  |
| Batf     | 1.0004     | 0.0407  |
| Loxl2    | -1.0021269 | 0.00239 |
| Kcna5    | -1.0057269 | 0.00747 |
| Jun      | -1.0122448 | 0.0241  |
| Qpct     | -1.0185769 | 0.00296 |
| Adamts20 | -1.0261951 | 0.0052  |
| Usp2     | -1.0291867 | 0.00502 |
| Hey2     | -1.0320023 | 0.0314  |
| Sox8     | -1.0357209 | 0.0355  |
| Gadd45g  | -1.0398923 | 0.0285  |
| Fam169a  | -1.0472746 | 0.0119  |
| Tsc22d3  | -1.0495333 | 0.00252 |
| Trdn     | -1.0552334 | 0.00215 |
| Itga11   | -1.0768242 | 0.00686 |
| Dlgap2   | -1.0792269 | 0.014   |
| Dusp8    | -1.0806876 | 0.0326  |
| Eln      | -1.08203   | 0.00213 |
| Tmem132c | -1.0970441 | 0.00689 |
| Xirp1    | -1.0990353 | 0.0453  |
| Npnt     | -1.0996758 | 0.00241 |
| Trpc4    | -1.1009669 | 0.00908 |
| Clvs1    | -1.1056626 | 0.0132  |
| Aloxe3   | -1.1083363 | 0.0127  |
| Svopl    | -1.1112271 | 0.00723 |
| Pln      | -1.1122826 | 0.00374 |
| Tmem267  | -1.1133486 | 0.0415  |
| Rasd1    | -1.1196009 | 0.0401  |
| St8sia2  | -1.1428356 | 0.0231  |
| Tnnt1    | -1.1504222 | 0.0125  |
| Lmo3     | -1.1508443 | 0.0367  |
| Mchr1    | -1.1858723 | 0.00934 |
| Tmem200c | -1.1918324 | 0.0181  |
| Fam107a  | -1.2027821 | 0.00167 |
| Gm11816  | -1.2054484 | 0.0432  |
| Lvrn     | -1.2140935 | 0.00619 |
| Cytl1    | -1.216129  | 0.0167  |
| Hmcn2    | -1.2244972 | 0.00222 |
| Zim1     | -1.2332874 | 0.0493  |
| Zp3r     | -1.2502755 | 0.0153  |
| Amotl2   | -1.2587989 | 0.0154  |
| Col6a6   | -1.2936132 | 0.0202  |
| Susd5    | -1.3316688 | 0.00551 |
| Tnnt3    | -1.3361346 | 0.00213 |
| Gm14066  | -1.3487252 | 0.018   |

|          |            |          |
|----------|------------|----------|
| Tmem200a | -1.363788  | 0.00703  |
| Brinp1   | -1.3855514 | 0.00454  |
| Omd      | -1.3995276 | 0.00686  |
| Cpb1     | -1.4134202 | 0.0102   |
| Gipc3    | -1.4272002 | 0.0386   |
| Dlk2     | -1.4356868 | 0.00213  |
| Lox      | -1.5045997 | 0.00407  |
| Col11a1  | -1.5442126 | 0.0068   |
| Mybpc1   | -1.6024746 | 0.00239  |
| Slc38a4  | -1.6420967 | 0.000523 |
| Gabrb2   | -1.7602423 | 0.00826  |
| Hs6st2   | -1.8378803 | 0.00826  |
| Hhatl    | -1.8393012 | 0.0154   |
| Fstl4    | -2.0885987 | 0.00923  |
| Igf2bp1  | -2.1664519 | 0.00573  |
| Hoxb13   | -2.2215383 | 0.00564  |
| Nrk      | -3.8067634 | 0.00465  |



|          | p_val | avg_logFC  | pct.1 | pct.2 | p_val_adj | cluster |   |
|----------|-------|------------|-------|-------|-----------|---------|---|
| Ccl7     | 0     | 2.35994097 | 0.731 | 0.102 | 0         | 0       | 0 |
| Ccl12    | 0     | 2.31340885 | 0.454 | 0.023 | 0         | 0       | 0 |
| Ccl2     | 0     | 2.15926863 | 0.827 | 0.145 | 0         | 0       | 0 |
| C1qa     | 0     | 2.11673246 | 0.98  | 0.168 | 0         | 0       | 0 |
| Ccl8     | 0     | 2.10840727 | 0.5   | 0.076 | 0         | 0       | 0 |
| C1qc     | 0     | 2.04425883 | 0.987 | 0.171 | 0         | 0       | 0 |
| Pf4      | 0     | 1.98901957 | 0.95  | 0.146 | 0         | 0       | 0 |
| C1qb     | 0     | 1.94371719 | 0.988 | 0.194 | 0         | 0       | 0 |
| Apoe     | 0     | 1.91721808 | 0.994 | 0.34  | 0         | 0       | 0 |
| Cxcl2    | 0     | 1.76848017 | 0.667 | 0.147 | 0         | 0       | 0 |
| Selenop  | 0     | 1.72309037 | 0.982 | 0.275 | 0         | 0       | 0 |
| Jun      | 0     | 1.65178541 | 0.924 | 0.347 | 0         | 0       | 0 |
| Cbr2     | 0     | 1.61571659 | 0.758 | 0.114 | 0         | 0       | 0 |
| Ier3     | 0     | 1.56273166 | 0.798 | 0.208 | 0         | 0       | 0 |
| Mmp9     | 0     | 1.5372779  | 0.614 | 0.07  | 0         | 0       | 0 |
| Csf1r    | 0     | 1.52575055 | 0.88  | 0.197 | 0         | 0       | 0 |
| Mrc1     | 0     | 1.51907338 | 0.848 | 0.171 | 0         | 0       | 0 |
| Cd14     | 0     | 1.48291478 | 0.675 | 0.157 | 0         | 0       | 0 |
| Marcksl1 | 0     | 1.48230142 | 0.907 | 0.318 | 0         | 0       | 0 |
| Ms4a7    | 0     | 1.48177739 | 0.492 | 0.036 | 0         | 0       | 0 |
| Stab1    | 0     | 1.47876141 | 0.537 | 0.05  | 0         | 0       | 0 |
| C5ar1    | 0     | 1.45816334 | 0.624 | 0.077 | 0         | 0       | 0 |
| Ctsb     | 0     | 1.45002203 | 0.954 | 0.357 | 0         | 0       | 0 |
| Cd63     | 0     | 1.44464511 | 0.659 | 0.1   | 0         | 0       | 0 |
| Dab2     | 0     | 1.39484305 | 0.669 | 0.112 | 0         | 0       | 0 |
| Fos      | 0     | 1.3623821  | 0.956 | 0.537 | 0         | 0       | 0 |
| Egr1     | 0     | 1.35555876 | 0.906 | 0.346 | 0         | 0       | 0 |
| Mt1      | 0     | 1.28854537 | 0.865 | 0.304 | 0         | 0       | 0 |
| Grn      | 0     | 1.27359624 | 0.818 | 0.267 | 0         | 0       | 0 |
| Adgre1   | 0     | 1.26579469 | 0.512 | 0.072 | 0         | 0       | 0 |
| Lgmn     | 0     | 1.26543155 | 0.723 | 0.168 | 0         | 0       | 0 |
| Atf3     | 0     | 1.25936294 | 0.867 | 0.417 | 0         | 0       | 0 |
| Ifi207   | 0     | 1.24126909 | 0.485 | 0.071 | 0         | 0       | 0 |
| Nfkbiz   | 0     | 1.23820326 | 0.866 | 0.335 | 0         | 0       | 0 |
| C3ar1    | 0     | 1.23776916 | 0.451 | 0.051 | 0         | 0       | 0 |
| Cd163    | 0     | 1.22047516 | 0.465 | 0.073 | 0         | 0       | 0 |
| Fcgr3    | 0     | 1.21889668 | 0.608 | 0.132 | 0         | 0       | 0 |
| F13a1    | 0     | 1.20392227 | 0.757 | 0.161 | 0         | 0       | 0 |
| Igfbp4   | 0     | 1.20328822 | 0.626 | 0.106 | 0         | 0       | 0 |
| Folr2    | 0     | 1.19102742 | 0.702 | 0.11  | 0         | 0       | 0 |
| Lyz2     | 0     | 1.16901817 | 0.997 | 0.444 | 0         | 0       | 0 |
| Blvrb    | 0     | 1.16860842 | 0.588 | 0.13  | 0         | 0       | 0 |

|          |           |            |       |       |           |   |
|----------|-----------|------------|-------|-------|-----------|---|
| Fosb     | 0         | 1.15988639 | 0.898 | 0.403 | 0         | 0 |
| Itm2b    | 0         | 1.15385263 | 0.989 | 0.737 | 0         | 0 |
| Zfp36    | 0         | 1.14961707 | 0.948 | 0.528 | 0         | 0 |
| Wwp1     | 0         | 1.14660254 | 0.521 | 0.091 | 0         | 0 |
| Gas6     | 0         | 1.1400257  | 0.546 | 0.075 | 0         | 0 |
| Ftl1     | 0         | 1.13916286 | 0.998 | 0.864 | 0         | 0 |
| Ninj1    | 0         | 1.12992258 | 0.623 | 0.148 | 0         | 0 |
| Ctsc     | 0         | 1.12441156 | 0.821 | 0.314 | 0         | 0 |
| Dusp1    | 0         | 1.10339187 | 0.935 | 0.524 | 0         | 0 |
| Maf      | 0         | 1.06909072 | 0.613 | 0.136 | 0         | 0 |
| Pltp     | 0         | 1.06303685 | 0.745 | 0.235 | 0         | 0 |
| Mafb     | 0         | 1.02392972 | 0.667 | 0.163 | 0         | 0 |
| Fcer1g   | 0         | 0.86743436 | 0.962 | 0.481 | 0         | 0 |
| Fth1     | 0         | 0.75694145 | 0.999 | 0.947 | 0         | 0 |
| Rps16    | 0         | -0.7237931 | 0.952 | 0.979 | 0         | 0 |
| Rps24    | 0         | -0.727991  | 0.976 | 0.991 | 0         | 0 |
| Rpl13    | 0         | -0.7562329 | 0.973 | 0.984 | 0         | 0 |
| Rpl19    | 0         | -0.7826988 | 0.913 | 0.965 | 0         | 0 |
| Uba52    | 0         | -0.7992394 | 0.952 | 0.981 | 0         | 0 |
| Rps15a   | 0         | -0.8426263 | 0.907 | 0.961 | 0         | 0 |
| Rps7     | 0         | -0.8478542 | 0.891 | 0.954 | 0         | 0 |
| Rplp0    | 0         | -0.9781155 | 0.82  | 0.924 | 0         | 0 |
| Rpsa     | 0         | -1.1156585 | 0.853 | 0.956 | 0         | 0 |
| Tmsb10   | 0         | -2.2851992 | 0.385 | 0.886 | 0         | 0 |
| Cfp      | 1.09E-307 | 1.13950025 | 0.68  | 0.22  | 1.80E-303 | 0 |
| Fcrls    | 3.09E-304 | 1.1225653  | 0.472 | 0.085 | 5.08E-300 | 0 |
| Clec4n   | 1.53E-298 | 1.17361052 | 0.299 | 0.023 | 2.51E-294 | 0 |
| Tmem176b | 6.04E-295 | 0.95965111 | 0.825 | 0.343 | 9.94E-291 | 0 |
| Igf1     | 3.83E-292 | 1.06034155 | 0.394 | 0.053 | 6.30E-288 | 0 |
| Rps5     | 1.11E-291 | -0.7186771 | 0.936 | 0.969 | 1.83E-287 | 0 |
| Fcgrt    | 9.92E-290 | 0.99396649 | 0.61  | 0.169 | 1.63E-285 | 0 |
| Rpl18    | 1.55E-288 | -0.8036195 | 0.863 | 0.938 | 2.54E-284 | 0 |
| Cd52     | 1.09E-285 | -1.2714659 | 0.462 | 0.802 | 1.79E-281 | 0 |
| Klf4     | 8.22E-281 | 1.05493235 | 0.732 | 0.286 | 1.35E-276 | 0 |
| Rpl8     | 5.37E-278 | -0.827133  | 0.854 | 0.933 | 8.83E-274 | 0 |
| Ehd4     | 7.25E-276 | 1.0671032  | 0.605 | 0.183 | 1.19E-271 | 0 |
| Klf6     | 1.92E-275 | 1.0052359  | 0.847 | 0.451 | 3.16E-271 | 0 |
| Rpl18a   | 5.00E-275 | -0.7261524 | 0.933 | 0.969 | 8.22E-271 | 0 |
| Timp2    | 1.99E-274 | 0.94492705 | 0.531 | 0.121 | 3.27E-270 | 0 |
| Cd68     | 3.95E-272 | 1.12177004 | 0.601 | 0.19  | 6.49E-268 | 0 |
| Ltc4s    | 5.31E-271 | 0.98757808 | 0.439 | 0.076 | 8.73E-267 | 0 |
| Cfh      | 8.51E-270 | 1.05359929 | 0.502 | 0.114 | 1.40E-265 | 0 |
| Pla2g2d  | 5.33E-267 | 1.11742708 | 0.302 | 0.029 | 8.77E-263 | 0 |

|          |           |            |       |       |           |   |
|----------|-----------|------------|-------|-------|-----------|---|
| Rps19    | 7.33E-264 | -0.786274  | 0.884 | 0.945 | 1.21E-259 | 0 |
| App      | 1.93E-263 | 1.04164785 | 0.605 | 0.191 | 3.18E-259 | 0 |
| Cst3     | 9.22E-252 | 0.41886466 | 0.995 | 0.608 | 1.52E-247 | 0 |
| Fcna     | 9.54E-250 | 1.02091097 | 0.47  | 0.098 | 1.57E-245 | 0 |
| Rps3a1   | 1.68E-249 | -0.6331841 | 0.938 | 0.97  | 2.77E-245 | 0 |
| Pmp22    | 1.16E-245 | 0.91878361 | 0.322 | 0.04  | 1.91E-241 | 0 |
| Ifitm2   | 9.50E-245 | 0.86769334 | 0.747 | 0.302 | 1.56E-240 | 0 |
| Jund     | 1.97E-244 | 0.78524611 | 0.922 | 0.623 | 3.24E-240 | 0 |
| Rps10    | 3.25E-243 | -0.641152  | 0.924 | 0.965 | 5.35E-239 | 0 |
| Rpl32    | 1.21E-240 | -0.6573941 | 0.923 | 0.956 | 2.00E-236 | 0 |
| Rps20    | 3.38E-239 | -0.6429298 | 0.947 | 0.979 | 5.56E-235 | 0 |
| Cd81     | 1.36E-236 | 0.94042529 | 0.612 | 0.204 | 2.24E-232 | 0 |
| Tyropb   | 3.39E-234 | 0.65104884 | 0.966 | 0.519 | 5.58E-230 | 0 |
| Cltc     | 7.72E-234 | 0.9745965  | 0.65  | 0.252 | 1.27E-229 | 0 |
| Ccl24    | 5.01E-233 | 1.08530375 | 0.417 | 0.083 | 8.23E-229 | 0 |
| Coro1a   | 1.45E-230 | -1.1947113 | 0.334 | 0.712 | 2.39E-226 | 0 |
| Lamp1    | 1.80E-230 | 0.89020914 | 0.743 | 0.332 | 2.96E-226 | 0 |
| Neat1    | 1.56E-228 | 0.97108406 | 0.648 | 0.247 | 2.56E-224 | 0 |
| Cd209f   | 3.88E-228 | 1.19112245 | 0.418 | 0.087 | 6.39E-224 | 0 |
| Rpl9-ps6 | 4.78E-228 | -0.7319097 | 0.832 | 0.924 | 7.87E-224 | 0 |
| Ms4a4a   | 6.41E-225 | 0.95178471 | 0.315 | 0.045 | 1.05E-220 | 0 |
| Rhob     | 3.92E-224 | 1.02617951 | 0.512 | 0.145 | 6.45E-220 | 0 |
| Glul     | 2.20E-223 | 0.95686381 | 0.519 | 0.148 | 3.62E-219 | 0 |
| Pla2g7   | 6.38E-221 | 0.95635485 | 0.352 | 0.062 | 1.05E-216 | 0 |
| Junb     | 6.24E-220 | 0.6296168  | 0.965 | 0.812 | 1.03E-215 | 0 |
| Ctsl     | 7.41E-218 | 0.93787502 | 0.385 | 0.076 | 1.22E-213 | 0 |
| Rps3     | 8.54E-217 | -0.6820853 | 0.856 | 0.927 | 1.41E-212 | 0 |
| Trf      | 1.74E-216 | 0.95613257 | 0.476 | 0.129 | 2.86E-212 | 0 |
| Eef1a1   | 2.10E-215 | -0.553028  | 0.974 | 0.982 | 3.45E-211 | 0 |
| Fau      | 3.07E-213 | -0.4834212 | 0.987 | 0.993 | 5.05E-209 | 0 |
| Aif1     | 1.80E-212 | 0.97307321 | 0.472 | 0.133 | 2.97E-208 | 0 |
| P2ry6    | 5.69E-211 | 0.97314728 | 0.334 | 0.06  | 9.35E-207 | 0 |
| Rgs10    | 3.64E-207 | 0.91522611 | 0.568 | 0.203 | 5.99E-203 | 0 |
| Rps27    | 6.06E-206 | -0.7674981 | 0.829 | 0.92  | 9.97E-202 | 0 |
| Ccl3     | 2.10E-203 | 1.44392595 | 0.269 | 0.036 | 3.46E-199 | 0 |
| Mgl2     | 1.36E-201 | 0.85122733 | 0.549 | 0.17  | 2.24E-197 | 0 |
| Rps26    | 3.41E-201 | -0.6066439 | 0.898 | 0.943 | 5.61E-197 | 0 |
| Atp6v0c  | 4.69E-201 | 0.91145647 | 0.709 | 0.352 | 7.71E-197 | 0 |
| Abca1    | 1.56E-200 | 0.88948009 | 0.376 | 0.08  | 2.56E-196 | 0 |
| Cd209g   | 1.86E-198 | 1.0742848  | 0.317 | 0.053 | 3.06E-194 | 0 |
| Rps8     | 4.63E-198 | -0.4953405 | 0.969 | 0.987 | 7.61E-194 | 0 |
| Fxyd2    | 8.38E-197 | 0.83424657 | 0.321 | 0.054 | 1.38E-192 | 0 |
| Rps18    | 5.69E-196 | -0.7376191 | 0.777 | 0.893 | 9.36E-192 | 0 |

|          |           |            |       |       |           |   |
|----------|-----------|------------|-------|-------|-----------|---|
| Rps11    | 1.10E-194 | -0.5374686 | 0.953 | 0.97  | 1.80E-190 | 0 |
| Lst1     | 5.19E-193 | 0.85052728 | 0.434 | 0.113 | 8.53E-189 | 0 |
| Rps4x    | 8.96E-193 | -0.5336575 | 0.94  | 0.969 | 1.47E-188 | 0 |
| Hpgd     | 3.54E-191 | 0.95027136 | 0.33  | 0.064 | 5.82E-187 | 0 |
| Rps2     | 4.13E-189 | -0.5935115 | 0.918 | 0.95  | 6.79E-185 | 0 |
| Hexa     | 6.85E-188 | 0.87297817 | 0.575 | 0.221 | 1.13E-183 | 0 |
| Rpl6     | 4.99E-187 | -0.6452563 | 0.823 | 0.915 | 8.20E-183 | 0 |
| Stard8   | 9.04E-186 | 0.80483104 | 0.302 | 0.052 | 1.49E-181 | 0 |
| Rps27a   | 1.70E-185 | -0.5612422 | 0.9   | 0.946 | 2.79E-181 | 0 |
| Clec10a  | 1.10E-184 | 0.77420444 | 0.535 | 0.173 | 1.81E-180 | 0 |
| Ifitm3   | 1.12E-183 | 0.58676735 | 0.847 | 0.403 | 1.84E-179 | 0 |
| Cebpd    | 2.14E-183 | 0.98454724 | 0.357 | 0.081 | 3.53E-179 | 0 |
| Cd93     | 2.04E-182 | 0.85575398 | 0.28  | 0.045 | 3.35E-178 | 0 |
| Rgl1     | 2.39E-182 | 0.79751151 | 0.29  | 0.048 | 3.93E-178 | 0 |
| Nrp1     | 1.16E-181 | 0.86405975 | 0.365 | 0.084 | 1.91E-177 | 0 |
| Lsp1     | 8.02E-177 | -1.4863821 | 0.086 | 0.474 | 1.32E-172 | 0 |
| Zeb2     | 9.09E-174 | 0.80228605 | 0.579 | 0.225 | 1.50E-169 | 0 |
| Serinc3  | 4.72E-173 | 0.75443862 | 0.651 | 0.284 | 7.76E-169 | 0 |
| Rpl11    | 5.52E-173 | -0.5605517 | 0.878 | 0.938 | 9.08E-169 | 0 |
| Rpl13a   | 5.75E-172 | -0.7774209 | 0.685 | 0.845 | 9.46E-168 | 0 |
| C4b      | 9.66E-172 | 0.79042235 | 0.343 | 0.072 | 1.59E-167 | 0 |
| Rpl34    | 1.52E-171 | -0.509905  | 0.915 | 0.954 | 2.51E-167 | 0 |
| Hmox1    | 5.65E-171 | 0.828542   | 0.331 | 0.071 | 9.30E-167 | 0 |
| Rpl39    | 9.06E-170 | -0.6241044 | 0.832 | 0.904 | 1.49E-165 | 0 |
| Rpl30    | 1.07E-168 | -0.5312251 | 0.922 | 0.961 | 1.76E-164 | 0 |
| Rps13    | 8.51E-168 | -0.6654941 | 0.734 | 0.855 | 1.40E-163 | 0 |
| Rpl27a   | 1.41E-167 | -0.6214404 | 0.827 | 0.904 | 2.32E-163 | 0 |
| Itsn1    | 1.48E-167 | 0.7395538  | 0.276 | 0.047 | 2.44E-163 | 0 |
| Lyve1    | 2.33E-167 | 0.77468214 | 0.322 | 0.065 | 3.83E-163 | 0 |
| Clta     | 2.01E-166 | 0.72004747 | 0.786 | 0.489 | 3.31E-162 | 0 |
| Cytip    | 6.42E-166 | -1.4249323 | 0.033 | 0.4   | 1.06E-161 | 0 |
| Ccl6     | 3.79E-164 | 0.58786367 | 0.74  | 0.331 | 6.23E-160 | 0 |
| Rpl23    | 1.27E-163 | -0.4562048 | 0.959 | 0.979 | 2.08E-159 | 0 |
| Tmem106a | 9.73E-163 | 0.77851715 | 0.293 | 0.058 | 1.60E-158 | 0 |
| Wfdc17   | 1.98E-162 | 0.88066509 | 0.608 | 0.261 | 3.26E-158 | 0 |
| Rpl12    | 4.88E-162 | -0.8354897 | 0.612 | 0.799 | 8.03E-158 | 0 |
| Rplp2    | 1.78E-160 | -0.5476904 | 0.867 | 0.932 | 2.92E-156 | 0 |
| Klf2     | 9.79E-158 | 0.7627779  | 0.822 | 0.538 | 1.61E-153 | 0 |
| Cd36     | 1.53E-156 | 0.76754905 | 0.381 | 0.102 | 2.51E-152 | 0 |
| Tmem176a | 9.76E-156 | 0.68623009 | 0.619 | 0.263 | 1.61E-151 | 0 |
| Rpl36    | 9.88E-156 | -0.5760191 | 0.835 | 0.916 | 1.63E-151 | 0 |
| Camk1    | 5.19E-154 | 0.7804731  | 0.27  | 0.052 | 8.53E-150 | 0 |
| Socs3    | 8.67E-154 | 0.86294605 | 0.531 | 0.216 | 1.43E-149 | 0 |

|           |           |            |       |       |           |    |
|-----------|-----------|------------|-------|-------|-----------|----|
| Sdc4      | 9.86E-154 | 0.97186159 | 0.429 | 0.14  | 1.62E-149 | 0  |
| Sirpa     | 1.42E-153 | 0.83209717 | 0.413 | 0.131 | 2.34E-149 | 0  |
| Rpl14     | 1.65E-153 | -0.7181411 | 0.672 | 0.815 | 2.71E-149 | 0  |
| Rps14     | 2.29E-152 | -0.514717  | 0.896 | 0.938 | 3.76E-148 | 0  |
| Ctsa      | 8.57E-151 | 0.79008379 | 0.537 | 0.221 | 1.41E-146 | 0  |
| Marcks    | 1.43E-150 | 0.69799672 | 0.606 | 0.264 | 2.35E-146 | 0  |
| Cited2    | 1.81E-150 | 0.95145699 | 0.394 | 0.123 | 2.99E-146 | 0  |
| Unc93b1   | 3.49E-150 | 0.69708098 | 0.727 | 0.397 | 5.75E-146 | 0  |
| Rpl37     | 4.05E-148 | -0.5164024 | 0.894 | 0.938 | 6.66E-144 | 0  |
| Tgfb1     | 6.21E-146 | 0.71912411 | 0.484 | 0.174 | 1.02E-141 | 0  |
| Rps23     | 6.69E-146 | -0.5341541 | 0.837 | 0.91  | 1.10E-141 | 0  |
| Rps6      | 2.72E-141 | -0.6888661 | 0.645 | 0.803 | 4.48E-137 | 0  |
| Rpl10a    | 5.71E-139 | -0.5791164 | 0.797 | 0.88  | 9.40E-135 | 0  |
| Egr2      | 3.00E-138 | 0.89821155 | 0.334 | 0.094 | 4.94E-134 | 0  |
| Rpl27     | 2.86E-136 | -0.6064187 | 0.752 | 0.849 | 4.70E-132 | 0  |
| Bri3      | 4.48E-133 | 0.71643566 | 0.616 | 0.311 | 7.37E-129 | 0  |
| Rpl28     | 1.16E-132 | -0.4926293 | 0.889 | 0.92  | 1.91E-128 | 0  |
| Nfkbia    | 1.35E-132 | 0.57594954 | 0.786 | 0.454 | 2.23E-128 | 0  |
| Rpl3      | 3.27E-132 | -0.615582  | 0.761 | 0.857 | 5.37E-128 | 0  |
| Rpl35     | 1.69E-131 | -0.4890617 | 0.896 | 0.931 | 2.77E-127 | 0  |
| Mcl1      | 2.12E-131 | 0.68375971 | 0.672 | 0.366 | 3.49E-127 | 0  |
| Napsa     | 1.98E-130 | -1.3351812 | 0.021 | 0.325 | 3.26E-126 | 0  |
| Ctsd      | 3.09E-130 | 0.66541689 | 0.543 | 0.228 | 5.08E-126 | 0  |
| Rpl15     | 1.15E-129 | -0.5624291 | 0.779 | 0.865 | 1.90E-125 | 0  |
| Ptprcap   | 1.40E-129 | -1.4502263 | 0.024 | 0.325 | 2.30E-125 | 0  |
| Fcgr2b    | 1.43E-129 | 0.74020259 | 0.515 | 0.22  | 2.36E-125 | 0  |
| Gm10076   | 5.34E-128 | -0.4447128 | 0.93  | 0.959 | 8.78E-124 | 0  |
| Rpl37a    | 5.37E-128 | -0.4644047 | 0.912 | 0.947 | 8.83E-124 | 0  |
| Sat1      | 5.63E-126 | 0.64781139 | 0.586 | 0.278 | 9.26E-122 | 0  |
| Clec4a1   | 1.10E-124 | 0.70996512 | 0.294 | 0.077 | 1.81E-120 | 0  |
| Serp1nb6a | 1.70E-124 | 0.70507937 | 0.326 | 0.092 | 2.80E-120 | 0  |
| Kctd12    | 2.98E-123 | 0.72455474 | 0.604 | 0.313 | 4.90E-119 | 0  |
| Rps9      | 2.84E-121 | -0.3949198 | 0.954 | 0.965 | 4.67E-117 | 0  |
| Gas7      | 6.18E-121 | 0.68015598 | 0.286 | 0.074 | 1.02E-116 | 0  |
| Clec4a2   | 8.73E-121 | 0.73929889 | 0.298 | 0.083 | 1.44E-116 | 0  |
| Btg1      | 4.18E-119 | -0.940205  | 0.362 | 0.626 | 6.87E-115 | 0  |
| H3f3b     | 8.27E-119 | 0.48538463 | 0.967 | 0.885 | 1.36E-114 | 0  |
| Ubc       | 3.83E-118 | 0.68136404 | 0.744 | 0.49  | 6.31E-114 | 0  |
| Rpl29     | 1.73E-117 | -0.5229158 | 0.802 | 0.871 | 2.84E-113 | 0  |
| S100a11   | 6.64E-117 | -1.10334   | 0.159 | 0.458 | 1.09E-112 | 0  |
| H2-M2.1   | 1.45E-304 | 2.09225972 | 0.629 | 0.007 | 2.38E-300 | 18 |
| Anxa5     | 8.97E-114 | 0.68942415 | 0.567 | 0.286 | 1.47E-109 | 0  |
| Lamp2     | 4.34E-113 | 0.69335381 | 0.362 | 0.125 | 7.15E-109 | 0  |

|           |           |            |       |       |           |   |
|-----------|-----------|------------|-------|-------|-----------|---|
| Atp6v0b   | 1.45E-112 | 0.65550904 | 0.585 | 0.304 | 2.38E-108 | 0 |
| Gm26532   | 4.00E-112 | 0.78549852 | 0.326 | 0.105 | 6.57E-108 | 0 |
| Tcn2      | 8.76E-112 | 0.58477899 | 0.255 | 0.061 | 1.44E-107 | 0 |
| Hacd4     | 1.20E-111 | 0.63562237 | 0.291 | 0.081 | 1.98E-107 | 0 |
| Cd79a     | 7.27E-110 | -2.0605119 | 0.037 | 0.305 | 1.20E-105 | 0 |
| Eef2      | 8.90E-110 | -0.6526512 | 0.612 | 0.761 | 1.46E-105 | 0 |
| Rac2      | 1.59E-109 | -0.9445797 | 0.259 | 0.537 | 2.62E-105 | 0 |
| Sertad1   | 5.53E-108 | 0.75372573 | 0.332 | 0.112 | 9.10E-104 | 0 |
| Cstb      | 2.40E-106 | 0.75176585 | 0.458 | 0.208 | 3.94E-102 | 0 |
| Ier2      | 6.38E-106 | 0.66999523 | 0.749 | 0.508 | 1.05E-101 | 0 |
| Asah1     | 8.01E-105 | 0.6874282  | 0.338 | 0.117 | 1.32E-100 | 0 |
| Rpl26     | 1.19E-103 | -0.4398819 | 0.865 | 0.907 | 1.96E-99  | 0 |
| Btg2      | 1.92E-102 | 0.53528163 | 0.844 | 0.628 | 3.16E-98  | 0 |
| Rpl22     | 5.11E-102 | -0.5061425 | 0.749 | 0.847 | 8.41E-98  | 0 |
| S100a6    | 1.45E-101 | -0.6968636 | 0.612 | 0.787 | 2.38E-97  | 0 |
| Cndp2     | 6.97E-100 | 0.63542709 | 0.295 | 0.093 | 1.15E-95  | 0 |
| Dhrs3     | 7.47E-100 | 0.58352275 | 0.264 | 0.073 | 1.23E-95  | 0 |
| Lmna      | 1.94E-99  | 0.76644426 | 0.401 | 0.165 | 3.20E-95  | 0 |
| Ftl1-ps1  | 2.18E-99  | 0.6382973  | 0.286 | 0.089 | 3.59E-95  | 0 |
| Rack1     | 2.36E-99  | -0.5514683 | 0.676 | 0.792 | 3.88E-95  | 0 |
| Npc2      | 8.32E-99  | 0.48949164 | 0.737 | 0.456 | 1.37E-94  | 0 |
| Ltb       | 3.36E-97  | -1.2957816 | 0.016 | 0.254 | 5.53E-93  | 0 |
| Cnn2      | 1.52E-96  | -0.9818302 | 0.132 | 0.401 | 2.50E-92  | 0 |
| Rpl24     | 2.07E-96  | -0.4670402 | 0.801 | 0.864 | 3.41E-92  | 0 |
| Cebpb     | 3.41E-96  | 0.52704555 | 0.557 | 0.273 | 5.61E-92  | 0 |
| Ier5      | 2.00E-95  | 0.66162129 | 0.575 | 0.32  | 3.29E-91  | 0 |
| Sdc3      | 5.11E-94  | 0.66917583 | 0.342 | 0.128 | 8.41E-90  | 0 |
| Rpl7      | 1.41E-93  | -0.4720803 | 0.783 | 0.856 | 2.32E-89  | 0 |
| Ppp1r10   | 9.72E-93  | 0.69082443 | 0.298 | 0.101 | 1.60E-88  | 0 |
| Vps37b    | 9.87E-93  | -1.2883617 | 0.05  | 0.292 | 1.62E-88  | 0 |
| Pld4      | 2.23E-91  | 0.60370793 | 0.526 | 0.276 | 3.68E-87  | 0 |
| Gpx1      | 5.65E-91  | 0.36727726 | 0.927 | 0.658 | 9.29E-87  | 0 |
| Shisa5    | 1.01E-90  | -0.9311474 | 0.247 | 0.502 | 1.67E-86  | 0 |
| Snx2      | 1.27E-90  | 0.62236818 | 0.404 | 0.172 | 2.08E-86  | 0 |
| Rps21     | 4.84E-90  | -0.449192  | 0.839 | 0.894 | 7.96E-86  | 0 |
| Rpl36a    | 5.09E-90  | -0.5574246 | 0.661 | 0.785 | 8.38E-86  | 0 |
| Tubb6     | 5.87E-90  | 0.65485992 | 0.313 | 0.115 | 9.66E-86  | 0 |
| Lrrc25    | 1.91E-88  | 0.64235965 | 0.273 | 0.091 | 3.14E-84  | 0 |
| Dusp5     | 2.88E-88  | -1.0230899 | 0.04  | 0.277 | 4.74E-84  | 0 |
| Ifi271l2a | 2.74E-87  | 0.63600942 | 0.614 | 0.35  | 4.51E-83  | 0 |
| Rpl4      | 1.02E-86  | -0.6219973 | 0.505 | 0.679 | 1.68E-82  | 0 |
| Atp2b1    | 2.24E-85  | 0.55055922 | 0.551 | 0.296 | 3.68E-81  | 0 |
| Arrb2     | 1.48E-84  | 0.64700026 | 0.301 | 0.111 | 2.44E-80  | 0 |

|         |           |            |       |       |           |    |
|---------|-----------|------------|-------|-------|-----------|----|
| Zfand5  | 5.36E-84  | 0.63792931 | 0.444 | 0.216 | 8.82E-80  | 0  |
| Rpl5    | 2.65E-83  | -0.5695434 | 0.613 | 0.743 | 4.36E-79  | 0  |
| Lmo2    | 2.72E-83  | 0.57336989 | 0.262 | 0.085 | 4.47E-79  | 0  |
| Rpl21   | 2.93E-83  | -0.5813812 | 0.54  | 0.711 | 4.82E-79  | 0  |
| Sbno2   | 2.85E-82  | 0.67359678 | 0.318 | 0.124 | 4.69E-78  | 0  |
| Mpp1    | 1.32E-81  | 0.57479949 | 0.256 | 0.082 | 2.18E-77  | 0  |
| Tpp1    | 1.32E-80  | 0.56507232 | 0.253 | 0.082 | 2.17E-76  | 0  |
| Bst2    | 2.43E-79  | 0.62040766 | 0.386 | 0.177 | 4.00E-75  | 0  |
| Eef1b2  | 2.22E-78  | -0.5816145 | 0.556 | 0.698 | 3.65E-74  | 0  |
| Ctss    | 1.31E-77  | 0.4887573  | 0.7   | 0.452 | 2.16E-73  | 0  |
| Eif3f   | 2.19E-77  | -0.620153  | 0.467 | 0.655 | 3.61E-73  | 0  |
| Ap1b1   | 5.46E-77  | 0.58090031 | 0.271 | 0.097 | 8.98E-73  | 0  |
| Tgfbr2  | 6.61E-77  | 0.52771046 | 0.404 | 0.182 | 1.09E-72  | 0  |
| Pfn1    | 1.57E-76  | -0.4637032 | 0.828 | 0.867 | 2.57E-72  | 0  |
| Ctsh    | 2.60E-76  | 0.47898797 | 0.586 | 0.336 | 4.28E-72  | 0  |
| H2-M2   | 1.11E-300 | 2.00317609 | 0.405 | 0.006 | 1.83E-296 | 16 |
| Snx6    | 5.49E-76  | 0.53853855 | 0.285 | 0.105 | 9.03E-72  | 0  |
| Ezr     | 1.42E-75  | -0.9097387 | 0.062 | 0.28  | 2.34E-71  | 0  |
| Myo5a   | 1.50E-75  | 0.59051582 | 0.257 | 0.089 | 2.47E-71  | 0  |
| Gabarap | 3.09E-75  | 0.46211721 | 0.736 | 0.523 | 5.08E-71  | 0  |
| Rtn4    | 8.66E-75  | 0.57441203 | 0.42  | 0.209 | 1.42E-70  | 0  |
| Rrbp1   | 1.51E-74  | 0.50488356 | 0.531 | 0.303 | 2.48E-70  | 0  |
| Ms4a6c  | 2.37E-72  | 0.49574346 | 0.401 | 0.186 | 3.89E-68  | 0  |
| Snx3    | 3.13E-71  | 0.51488499 | 0.528 | 0.306 | 5.14E-67  | 0  |
| Eps8    | 1.06E-70  | 0.56042514 | 0.291 | 0.114 | 1.74E-66  | 0  |
| Il2rg   | 1.51E-70  | -0.9078348 | 0.11  | 0.327 | 2.48E-66  | 0  |
| Ap2a2   | 2.03E-70  | 0.57090353 | 0.268 | 0.1   | 3.34E-66  | 0  |
| Cyfip1  | 2.15E-70  | 0.57808152 | 0.327 | 0.14  | 3.53E-66  | 0  |
| Gapdh   | 3.37E-70  | -0.5157668 | 0.626 | 0.735 | 5.55E-66  | 0  |
| Ets2    | 1.19E-68  | 0.5418005  | 0.289 | 0.113 | 1.97E-64  | 0  |
| Lipa    | 1.95E-68  | 0.52846481 | 0.253 | 0.092 | 3.21E-64  | 0  |
| Kdm6b   | 2.12E-68  | 0.51760362 | 0.488 | 0.268 | 3.49E-64  | 0  |
| Rps15   | 2.29E-68  | -0.534534  | 0.563 | 0.702 | 3.77E-64  | 0  |
| Wsb1    | 5.76E-68  | 0.54699078 | 0.277 | 0.108 | 9.48E-64  | 0  |
| Myl12b  | 1.14E-67  | -0.6683391 | 0.343 | 0.548 | 1.87E-63  | 0  |
| Rpl38   | 1.58E-67  | -0.431541  | 0.723 | 0.812 | 2.60E-63  | 0  |
| Actg1   | 2.00E-67  | -0.4285805 | 0.901 | 0.901 | 3.29E-63  | 0  |
| Abhd12  | 6.46E-67  | 0.55005618 | 0.263 | 0.1   | 1.06E-62  | 0  |
| Ptprc   | 7.73E-66  | -0.7428115 | 0.268 | 0.484 | 1.27E-61  | 0  |
| Akr1a1  | 9.76E-66  | 0.50064152 | 0.521 | 0.311 | 1.60E-61  | 0  |
| Psmb8   | 1.56E-65  | -0.6640384 | 0.317 | 0.52  | 2.57E-61  | 0  |
| Fxyd5   | 1.69E-65  | -0.7467183 | 0.305 | 0.505 | 2.78E-61  | 0  |
| Actb    | 2.80E-65  | -0.2956252 | 0.997 | 0.992 | 4.61E-61  | 0  |

|           |           |            |       |       |           |    |
|-----------|-----------|------------|-------|-------|-----------|----|
| Ctsz      | 1.01E-64  | 0.49715334 | 0.523 | 0.31  | 1.67E-60  | 0  |
| Arhgdib   | 1.06E-64  | -0.6071016 | 0.46  | 0.629 | 1.75E-60  | 0  |
| Slc6a6    | 3.10E-64  | 0.52970412 | 0.331 | 0.151 | 5.10E-60  | 0  |
| Calm2     | 2.17E-63  | 0.47099968 | 0.561 | 0.343 | 3.57E-59  | 0  |
| Ehd1      | 4.54E-63  | 0.56567361 | 0.338 | 0.158 | 7.47E-59  | 0  |
| Aplp2     | 1.57E-61  | 0.46720903 | 0.395 | 0.196 | 2.58E-57  | 0  |
| Creg1     | 2.27E-61  | 0.51795821 | 0.35  | 0.168 | 3.73E-57  | 0  |
| Ly6d      | 3.72E-61  | -1.2191665 | 0.154 | 0.346 | 6.12E-57  | 0  |
| Rpl9      | 1.35E-60  | -0.502492  | 0.493 | 0.663 | 2.21E-56  | 0  |
| Comt      | 2.43E-60  | 0.50526669 | 0.256 | 0.101 | 4.00E-56  | 0  |
| Srgn      | 2.87E-60  | -0.51744   | 0.554 | 0.702 | 4.72E-56  | 0  |
| Plek      | 3.02E-60  | 0.53270128 | 0.508 | 0.306 | 4.97E-56  | 0  |
| Fyb       | 1.58E-59  | 0.4285312  | 0.413 | 0.209 | 2.60E-55  | 0  |
| Ifnar2    | 4.41E-59  | 0.50086014 | 0.33  | 0.155 | 7.26E-55  | 0  |
| Myh9      | 6.65E-59  | -0.6431566 | 0.346 | 0.541 | 1.09E-54  | 0  |
| Sub1      | 8.82E-59  | -0.6726456 | 0.313 | 0.501 | 1.45E-54  | 0  |
| H2-DMb2.1 | 0         | 1.62308001 | 0.673 | 0.177 | 0         | 1  |
| Man2b1    | 4.08E-58  | 0.47882264 | 0.458 | 0.26  | 6.71E-54  | 0  |
| H2-Ob     | 3.12E-238 | 1.45105795 | 0.471 | 0.106 | 5.14E-234 | 1  |
| Ptafr     | 1.52E-57  | 0.44252577 | 0.277 | 0.116 | 2.50E-53  | 0  |
| Stk17b    | 3.57E-57  | -0.747931  | 0.28  | 0.476 | 5.88E-53  | 0  |
| Nrros     | 4.79E-57  | 0.48426534 | 0.441 | 0.245 | 7.89E-53  | 0  |
| Rnf130    | 2.57E-56  | 0.49889824 | 0.301 | 0.137 | 4.23E-52  | 0  |
| Sdcbp     | 3.02E-56  | 0.51356055 | 0.423 | 0.238 | 4.97E-52  | 0  |
| Trib1     | 1.97E-55  | 0.5705983  | 0.367 | 0.192 | 3.25E-51  | 0  |
| Sqstm1    | 2.16E-55  | 0.57422216 | 0.525 | 0.346 | 3.55E-51  | 0  |
| Btf3      | 6.48E-55  | -0.4948659 | 0.495 | 0.642 | 1.07E-50  | 0  |
| Pnp       | 1.65E-54  | 0.50465356 | 0.263 | 0.113 | 2.72E-50  | 0  |
| Msn       | 2.88E-54  | -0.666673  | 0.284 | 0.472 | 4.74E-50  | 0  |
| Limd2     | 6.88E-54  | -0.7530102 | 0.205 | 0.394 | 1.13E-49  | 0  |
| Rps12     | 1.48E-53  | -0.2859496 | 0.929 | 0.94  | 2.44E-49  | 0  |
| Ddx3x     | 3.02E-53  | 0.5114418  | 0.411 | 0.232 | 4.96E-49  | 0  |
| Vsir      | 4.21E-53  | 0.46589668 | 0.285 | 0.13  | 6.93E-49  | 0  |
| Rpl17     | 6.36E-52  | -0.5193209 | 0.446 | 0.602 | 1.05E-47  | 0  |
| Snx5      | 9.40E-52  | 0.437357   | 0.471 | 0.279 | 1.55E-47  | 0  |
| Anxa2     | 1.38E-51  | -0.7280955 | 0.127 | 0.312 | 2.27E-47  | 0  |
| H2-Eb1.12 | 6.12E-18  | 1.1980895  | 0.971 | 0.707 | 1.01E-13  | 18 |
| BC005537  | 1.78E-51  | 0.43996106 | 0.325 | 0.158 | 2.94E-47  | 0  |
| Alox5ap   | 3.41E-51  | 0.26280243 | 0.608 | 0.345 | 5.61E-47  | 0  |
| AW112010  | 5.46E-51  | -1.2212707 | 0.123 | 0.295 | 8.98E-47  | 0  |
| Laptm4a   | 6.76E-51  | 0.46486413 | 0.418 | 0.236 | 1.11E-46  | 0  |
| Pid1      | 7.25E-51  | 0.48957541 | 0.254 | 0.111 | 1.19E-46  | 0  |
| Dennd4a   | 6.96E-49  | -0.6948262 | 0.104 | 0.278 | 1.14E-44  | 0  |



|          |          |            |       |       |          |   |
|----------|----------|------------|-------|-------|----------|---|
| Clic4    | 1.26E-48 | 0.53205846 | 0.386 | 0.218 | 2.08E-44 | 0 |
| Pepd     | 1.64E-48 | 0.43651743 | 0.262 | 0.118 | 2.70E-44 | 0 |
| Rps28    | 4.16E-48 | -0.3512217 | 0.753 | 0.809 | 6.85E-44 | 0 |
| Eno1     | 6.18E-47 | -0.6055985 | 0.27  | 0.448 | 1.02E-42 | 0 |
| Nfkbid   | 6.44E-46 | 0.56279933 | 0.373 | 0.212 | 1.06E-41 | 0 |
| Tnfrsf1a | 7.01E-46 | 0.45604497 | 0.276 | 0.132 | 1.15E-41 | 0 |
| Zcchc6   | 1.38E-45 | 0.46394338 | 0.298 | 0.148 | 2.27E-41 | 0 |
| Scamp2   | 1.42E-45 | 0.491993   | 0.332 | 0.179 | 2.33E-41 | 0 |
| Naca     | 5.67E-45 | -0.4258302 | 0.571 | 0.68  | 9.33E-41 | 0 |
| Rpl23a   | 9.16E-45 | -0.4234868 | 0.535 | 0.662 | 1.51E-40 | 0 |
| Gadd45b  | 1.07E-44 | 0.4031897  | 0.387 | 0.217 | 1.75E-40 | 0 |
| Cd74     | 2.98E-44 | 0.27417369 | 0.962 | 0.793 | 4.91E-40 | 0 |
| Pabpc1   | 8.55E-44 | -0.4454213 | 0.538 | 0.658 | 1.41E-39 | 0 |
| Rassf4   | 7.81E-43 | 0.45176028 | 0.372 | 0.214 | 1.28E-38 | 0 |
| Ccl9     | 8.10E-43 | 0.36793278 | 0.37  | 0.199 | 1.33E-38 | 0 |
| Arhgap45 | 9.63E-43 | -0.6578662 | 0.179 | 0.349 | 1.58E-38 | 0 |
| Selplg   | 2.54E-42 | -0.6484507 | 0.171 | 0.339 | 4.18E-38 | 0 |
| Ly86     | 2.99E-42 | 0.40426359 | 0.455 | 0.284 | 4.92E-38 | 0 |
| Dnajb1   | 7.23E-42 | 0.49117231 | 0.264 | 0.129 | 1.19E-37 | 0 |
| Zfp36l1  | 1.09E-41 | 0.39767798 | 0.661 | 0.495 | 1.80E-37 | 0 |
| Eps15    | 7.96E-41 | 0.4230994  | 0.271 | 0.135 | 1.31E-36 | 0 |
| Hmox2    | 1.36E-40 | 0.40670753 | 0.264 | 0.13  | 2.24E-36 | 0 |
| Lgals1   | 1.42E-40 | 0.25567973 | 0.559 | 0.364 | 2.33E-36 | 0 |
| Gng5     | 6.62E-40 | 0.3130765  | 0.722 | 0.565 | 1.09E-35 | 0 |
| Rpl41    | 6.82E-40 | -0.3548985 | 0.685 | 0.76  | 1.12E-35 | 0 |
| Gpr132   | 8.55E-40 | -0.5662707 | 0.1   | 0.255 | 1.41E-35 | 0 |
| Spi1     | 8.64E-40 | 0.34510029 | 0.443 | 0.271 | 1.42E-35 | 0 |
| Gns      | 1.90E-39 | 0.39729557 | 0.265 | 0.131 | 3.13E-35 | 0 |
| Cd37     | 4.31E-39 | -0.781684  | 0.212 | 0.359 | 7.09E-35 | 0 |
| Rnaset2a | 6.83E-39 | 0.41612274 | 0.402 | 0.248 | 1.12E-34 | 0 |
| Rpl36al  | 8.27E-39 | -0.3995602 | 0.523 | 0.633 | 1.36E-34 | 0 |
| Vamp8    | 1.02E-38 | 0.37938734 | 0.474 | 0.309 | 1.68E-34 | 0 |
| Ppia     | 1.33E-38 | -0.2877887 | 0.88  | 0.89  | 2.19E-34 | 0 |
| Psme1    | 2.06E-38 | -0.5299391 | 0.275 | 0.437 | 3.39E-34 | 0 |
| Icam1    | 5.95E-38 | 0.50273029 | 0.283 | 0.15  | 9.79E-34 | 0 |
| Picalm   | 1.25E-37 | 0.39945194 | 0.271 | 0.139 | 2.06E-33 | 0 |
| Cd83     | 4.00E-37 | 0.41774027 | 0.598 | 0.439 | 6.58E-33 | 0 |
| Ifrd1    | 5.96E-37 | 0.47632634 | 0.352 | 0.212 | 9.81E-33 | 0 |
| Litaf    | 1.05E-36 | 0.38161826 | 0.386 | 0.233 | 1.73E-32 | 0 |
| Rbm3     | 1.18E-36 | -0.4372056 | 0.449 | 0.579 | 1.95E-32 | 0 |
| Ptma     | 2.30E-36 | -0.3734883 | 0.756 | 0.79  | 3.78E-32 | 0 |
| Aldh2    | 5.98E-36 | 0.34432008 | 0.324 | 0.178 | 9.84E-32 | 0 |
| Ucp2     | 3.83E-35 | -0.4327817 | 0.515 | 0.619 | 6.31E-31 | 0 |

|          |           |            |       |       |          |   |
|----------|-----------|------------|-------|-------|----------|---|
| Mtss1    | 8.98E-35  | 0.34091398 | 0.254 | 0.127 | 1.48E-30 | 0 |
| Ldha     | 1.36E-34  | -0.5395376 | 0.217 | 0.369 | 2.23E-30 | 0 |
| H2-Oa    | 1.16E-102 | 1.14504927 | 0.34  | 0.114 | 1.90E-98 | 1 |
| Rpl35a   | 3.78E-34  | -0.3388709 | 0.661 | 0.724 | 6.22E-30 | 0 |
| Rap1b    | 8.30E-34  | 0.28206331 | 0.549 | 0.382 | 1.36E-29 | 0 |
| H2afy    | 8.60E-34  | -0.5541532 | 0.137 | 0.281 | 1.41E-29 | 0 |
| Npm1     | 9.63E-34  | -0.4638324 | 0.435 | 0.554 | 1.58E-29 | 0 |
| mt-Nd4   | 1.00E-33  | 0.25049202 | 0.799 | 0.678 | 1.64E-29 | 0 |
| Eif5a    | 1.57E-33  | -0.4984137 | 0.307 | 0.453 | 2.58E-29 | 0 |
| Pkm      | 1.68E-33  | -0.5185342 | 0.188 | 0.338 | 2.77E-29 | 0 |
| Flna     | 1.91E-33  | -0.5631109 | 0.18  | 0.328 | 3.15E-29 | 0 |
| Gm2a     | 1.94E-33  | -0.6730965 | 0.176 | 0.314 | 3.20E-29 | 0 |
| Rpl7a    | 3.30E-33  | -0.3008112 | 0.725 | 0.772 | 5.42E-29 | 0 |
| Mat2a    | 5.94E-33  | 0.3908692  | 0.353 | 0.214 | 9.78E-29 | 0 |
| Prdx1    | 2.47E-32  | 0.29174494 | 0.502 | 0.349 | 4.06E-28 | 0 |
| Rpl22l1  | 3.04E-32  | -0.496227  | 0.332 | 0.47  | 5.00E-28 | 0 |
| Rbms1    | 9.03E-32  | 0.36155276 | 0.367 | 0.23  | 1.49E-27 | 0 |
| Irf1     | 1.10E-31  | 0.40102763 | 0.287 | 0.16  | 1.80E-27 | 0 |
| Cybb     | 1.39E-31  | 0.27246128 | 0.46  | 0.297 | 2.29E-27 | 0 |
| Ahnak    | 2.62E-31  | 0.2941642  | 0.682 | 0.513 | 4.32E-27 | 0 |
| Mrfap1   | 2.70E-31  | 0.34154676 | 0.384 | 0.245 | 4.45E-27 | 0 |
| Atp5e    | 2.79E-31  | -0.3676332 | 0.544 | 0.642 | 4.59E-27 | 0 |
| Tmem256  | 5.88E-31  | 0.37786298 | 0.304 | 0.18  | 9.67E-27 | 0 |
| Ubb      | 7.53E-31  | 0.25246902 | 0.926 | 0.862 | 1.24E-26 | 0 |
| Snrpg    | 1.66E-30  | -0.4896939 | 0.16  | 0.3   | 2.73E-26 | 0 |
| Sh3glb1  | 1.97E-30  | 0.33282238 | 0.467 | 0.323 | 3.24E-26 | 0 |
| Mef2c    | 8.01E-30  | 0.26173412 | 0.357 | 0.213 | 1.32E-25 | 0 |
| H3f3a    | 1.27E-29  | -0.3770824 | 0.716 | 0.744 | 2.09E-25 | 0 |
| Eif3h    | 1.35E-29  | -0.4614688 | 0.301 | 0.437 | 2.22E-25 | 0 |
| Card19   | 1.57E-29  | 0.38982953 | 0.264 | 0.148 | 2.58E-25 | 0 |
| Nme2     | 1.11E-28  | -0.3807529 | 0.467 | 0.572 | 1.82E-24 | 0 |
| Hsp90ab1 | 1.15E-28  | -0.28896   | 0.785 | 0.811 | 1.89E-24 | 0 |
| Eef1g    | 1.57E-28  | -0.485351  | 0.268 | 0.403 | 2.59E-24 | 0 |
| Taldo1   | 8.66E-28  | -0.4877189 | 0.172 | 0.305 | 1.42E-23 | 0 |
| Ddx5     | 9.26E-28  | 0.25348304 | 0.797 | 0.679 | 1.52E-23 | 0 |
| Gnai2    | 1.06E-27  | 0.25598306 | 0.653 | 0.497 | 1.74E-23 | 0 |
| Cnbp     | 1.15E-27  | -0.4527961 | 0.322 | 0.456 | 1.88E-23 | 0 |
| Ppp1ca   | 2.03E-27  | -0.4625839 | 0.271 | 0.403 | 3.34E-23 | 0 |
| S100a10  | 6.35E-27  | -0.3881546 | 0.351 | 0.487 | 1.04E-22 | 0 |
| Atpif1   | 6.36E-27  | 0.28024523 | 0.428 | 0.287 | 1.05E-22 | 0 |
| Bsg      | 2.14E-26  | 0.33766435 | 0.355 | 0.231 | 3.53E-22 | 0 |
| Slfn2    | 7.17E-26  | 0.33800754 | 0.315 | 0.194 | 1.18E-21 | 0 |
| Anp32b   | 8.94E-26  | -0.4606199 | 0.205 | 0.331 | 1.47E-21 | 0 |

|          |          |            |       |       |          |   |
|----------|----------|------------|-------|-------|----------|---|
| H2afz    | 1.04E-25 | -0.5409675 | 0.552 | 0.597 | 1.72E-21 | 0 |
| Serp1    | 1.18E-25 | -0.5147185 | 0.28  | 0.4   | 1.94E-21 | 0 |
| Aldoa    | 1.40E-25 | -0.4621754 | 0.267 | 0.392 | 2.31E-21 | 0 |
| Rpl31    | 3.72E-25 | -0.3842221 | 0.402 | 0.521 | 6.12E-21 | 0 |
| Cdk2ap2  | 6.46E-25 | -0.5142978 | 0.167 | 0.29  | 1.06E-20 | 0 |
| Zyx      | 1.19E-24 | -0.478849  | 0.165 | 0.287 | 1.96E-20 | 0 |
| Ap2s1    | 1.76E-24 | 0.30085084 | 0.284 | 0.173 | 2.90E-20 | 0 |
| Gstp1    | 2.95E-24 | -0.4662998 | 0.198 | 0.323 | 4.85E-20 | 0 |
| Nfe2l2   | 4.82E-24 | 0.36084183 | 0.278 | 0.171 | 7.92E-20 | 0 |
| Tpm4     | 6.75E-24 | -0.4886308 | 0.152 | 0.267 | 1.11E-19 | 0 |
| Atp5d    | 9.57E-24 | -0.3719517 | 0.339 | 0.463 | 1.57E-19 | 0 |
| Adgre5   | 1.38E-23 | -0.4164774 | 0.143 | 0.266 | 2.27E-19 | 0 |
| Clec2d   | 1.60E-23 | 0.33542251 | 0.27  | 0.163 | 2.63E-19 | 0 |
| Atf4     | 1.74E-23 | 0.31394238 | 0.301 | 0.189 | 2.86E-19 | 0 |
| Eif3i    | 1.80E-23 | -0.4174563 | 0.169 | 0.291 | 2.95E-19 | 0 |
| Itm2c    | 3.21E-23 | 0.30442862 | 0.298 | 0.188 | 5.28E-19 | 0 |
| Sec61b   | 3.66E-23 | -0.4058605 | 0.4   | 0.503 | 6.02E-19 | 0 |
| Psmb3    | 8.59E-23 | -0.4224269 | 0.174 | 0.293 | 1.41E-18 | 0 |
| Ccnl1    | 1.69E-22 | 0.29386861 | 0.403 | 0.282 | 2.77E-18 | 0 |
| Ywhaz    | 2.07E-22 | -0.3476067 | 0.444 | 0.551 | 3.41E-18 | 0 |
| Ppp1r15a | 2.72E-22 | 0.27014834 | 0.461 | 0.331 | 4.47E-18 | 0 |
| Rbpj     | 3.95E-22 | 0.27760388 | 0.258 | 0.155 | 6.50E-18 | 0 |
| Canx     | 5.87E-22 | 0.27022831 | 0.383 | 0.263 | 9.66E-18 | 0 |
| Rab14    | 6.13E-22 | 0.30341158 | 0.332 | 0.221 | 1.01E-17 | 0 |
| Hspa5    | 6.57E-22 | 0.27483774 | 0.563 | 0.439 | 1.08E-17 | 0 |
| Plekho2  | 1.11E-21 | 0.30665534 | 0.266 | 0.165 | 1.82E-17 | 0 |
| Ran      | 1.26E-21 | -0.4228534 | 0.207 | 0.322 | 2.07E-17 | 0 |
| Fis1     | 2.75E-21 | -0.4044287 | 0.205 | 0.323 | 4.52E-17 | 0 |
| Cyth4    | 2.80E-21 | 0.27866128 | 0.32  | 0.211 | 4.61E-17 | 0 |
| Rps25    | 1.08E-20 | -0.2831835 | 0.632 | 0.68  | 1.78E-16 | 0 |
| Psmb1    | 1.42E-20 | -0.3920961 | 0.22  | 0.334 | 2.34E-16 | 0 |
| Lamtor1  | 1.78E-20 | 0.3175935  | 0.277 | 0.179 | 2.93E-16 | 0 |
| Slc3a2   | 2.77E-20 | 0.26125106 | 0.301 | 0.196 | 4.56E-16 | 0 |
| Eif3e    | 3.29E-20 | -0.392013  | 0.175 | 0.288 | 5.41E-16 | 0 |
| Eif3k    | 4.00E-20 | -0.3427958 | 0.353 | 0.465 | 6.59E-16 | 0 |
| Herpud1  | 7.65E-20 | 0.34452406 | 0.263 | 0.167 | 1.26E-15 | 0 |
| Serbp1   | 9.25E-20 | -0.3596221 | 0.291 | 0.409 | 1.52E-15 | 0 |
| Gnas     | 2.55E-19 | -0.3277595 | 0.392 | 0.494 | 4.19E-15 | 0 |
| Actr3    | 2.62E-19 | -0.3267061 | 0.454 | 0.542 | 4.31E-15 | 0 |
| Gltp     | 9.18E-19 | 0.28261586 | 0.339 | 0.238 | 1.51E-14 | 0 |
| Lsm4     | 1.09E-18 | -0.3858325 | 0.155 | 0.259 | 1.79E-14 | 0 |
| Tmed10   | 1.37E-18 | 0.27819769 | 0.369 | 0.264 | 2.25E-14 | 0 |
| Mif      | 1.58E-18 | -0.4388168 | 0.168 | 0.268 | 2.61E-14 | 0 |

|         |          |            |       |       |          |   |
|---------|----------|------------|-------|-------|----------|---|
| Coro1b  | 1.62E-18 | 0.26047207 | 0.325 | 0.224 | 2.67E-14 | 0 |
| Fkbp2   | 3.91E-18 | 0.26614737 | 0.252 | 0.161 | 6.44E-14 | 0 |
| Pde4b   | 4.55E-18 | -0.3461307 | 0.329 | 0.44  | 7.49E-14 | 0 |
| Capg    | 1.04E-17 | -0.4266346 | 0.181 | 0.277 | 1.71E-13 | 0 |
| Akap13  | 1.39E-17 | -0.3709837 | 0.239 | 0.344 | 2.29E-13 | 0 |
| Psme2   | 1.88E-17 | -0.396085  | 0.253 | 0.355 | 3.08E-13 | 0 |
| Fkbp1a  | 2.65E-17 | 0.25850284 | 0.331 | 0.233 | 4.37E-13 | 0 |
| Nol7    | 4.04E-17 | -0.3477525 | 0.188 | 0.291 | 6.64E-13 | 0 |
| Macf1   | 5.30E-17 | -0.3916565 | 0.167 | 0.264 | 8.72E-13 | 0 |
| Rbm39   | 8.67E-17 | -0.3131851 | 0.455 | 0.55  | 1.43E-12 | 0 |
| Cycs    | 1.18E-16 | -0.3484782 | 0.166 | 0.266 | 1.94E-12 | 0 |
| Hnrnpa1 | 1.38E-16 | -0.3611647 | 0.22  | 0.322 | 2.28E-12 | 0 |
| Ndufc2  | 2.42E-16 | 0.25283499 | 0.298 | 0.206 | 3.97E-12 | 0 |
| Snrpe   | 4.60E-16 | -0.3567734 | 0.226 | 0.326 | 7.57E-12 | 0 |
| Atp5b   | 6.83E-16 | -0.3517784 | 0.285 | 0.378 | 1.12E-11 | 0 |
| Atp5h   | 7.13E-16 | -0.3057471 | 0.434 | 0.513 | 1.17E-11 | 0 |
| Csrnp1  | 8.14E-16 | 0.28558535 | 0.296 | 0.206 | 1.34E-11 | 0 |
| Psmb9   | 1.10E-15 | -0.3579929 | 0.167 | 0.26  | 1.81E-11 | 0 |
| Hnrnpa3 | 1.18E-15 | -0.3197334 | 0.44  | 0.519 | 1.95E-11 | 0 |
| Gm8186  | 3.05E-15 | -0.3417352 | 0.181 | 0.277 | 5.01E-11 | 0 |
| Uqcrh   | 4.66E-15 | -0.2867422 | 0.504 | 0.576 | 7.67E-11 | 0 |
| Psm7    | 4.86E-15 | -0.3251406 | 0.254 | 0.35  | 7.99E-11 | 0 |
| Cd47    | 5.58E-15 | -0.3222676 | 0.274 | 0.368 | 9.17E-11 | 0 |
| Myl12a  | 1.18E-14 | -0.3172381 | 0.316 | 0.412 | 1.94E-10 | 0 |
| Snrpf   | 1.21E-14 | -0.2997322 | 0.174 | 0.269 | 1.99E-10 | 0 |
| Sec11c  | 2.30E-14 | -0.3408001 | 0.189 | 0.281 | 3.79E-10 | 0 |
| Syng2   | 1.05E-13 | -0.3540227 | 0.179 | 0.265 | 1.73E-09 | 0 |
| Pgls    | 1.89E-13 | -0.3076441 | 0.214 | 0.305 | 3.11E-09 | 0 |
| Dad1    | 2.64E-13 | -0.3580882 | 0.257 | 0.343 | 4.34E-09 | 0 |
| Hspe1   | 3.65E-13 | -0.3185134 | 0.226 | 0.314 | 6.00E-09 | 0 |
| Tubb5   | 4.77E-13 | -0.4107194 | 0.231 | 0.313 | 7.85E-09 | 0 |
| Capzb   | 5.12E-13 | -0.2640156 | 0.409 | 0.489 | 8.42E-09 | 0 |
| Gm26917 | 8.99E-13 | -0.3883558 | 0.331 | 0.419 | 1.48E-08 | 0 |
| Abrac1  | 9.02E-13 | -0.2939244 | 0.191 | 0.278 | 1.48E-08 | 0 |
| Rilpl2  | 1.13E-12 | 0.31092324 | 0.276 | 0.202 | 1.86E-08 | 0 |
| Rtraf   | 1.28E-11 | -0.3014193 | 0.202 | 0.283 | 2.10E-07 | 0 |
| Atp5c1  | 1.80E-11 | -0.2614057 | 0.272 | 0.361 | 2.96E-07 | 0 |
| Dock2   | 3.02E-11 | -0.3437668 | 0.191 | 0.266 | 4.97E-07 | 0 |
| Mrpl52  | 4.26E-11 | -0.2767944 | 0.252 | 0.335 | 7.01E-07 | 0 |
| Eef1d   | 4.41E-11 | -0.2934658 | 0.35  | 0.426 | 7.26E-07 | 0 |
| Kmt2e   | 4.49E-11 | -0.3094332 | 0.21  | 0.285 | 7.39E-07 | 0 |
| Hmgb2   | 5.31E-11 | -0.4151882 | 0.194 | 0.264 | 8.73E-07 | 0 |
| Tma7    | 1.01E-10 | -0.2637713 | 0.273 | 0.352 | 1.66E-06 | 0 |

|           |            |            |       |       |            |    |
|-----------|------------|------------|-------|-------|------------|----|
| Hnrnpf    | 1.38E-10   | -0.2724068 | 0.376 | 0.448 | 2.27E-06   | 0  |
| Krtcap2   | 2.94E-10   | -0.2928919 | 0.235 | 0.311 | 4.84E-06   | 0  |
| Arf6      | 4.31E-10   | -0.2698239 | 0.186 | 0.26  | 7.09E-06   | 0  |
| Fam49b    | 5.51E-10   | -0.2658236 | 0.238 | 0.315 | 9.07E-06   | 0  |
| Nap1l1    | 9.93E-10   | -0.2823267 | 0.203 | 0.275 | 1.63E-05   | 0  |
| Ndufb11   | 3.77E-09   | -0.2600454 | 0.282 | 0.352 | 6.20E-05   | 0  |
| Tom20     | 4.01E-09   | -0.2531428 | 0.195 | 0.268 | 6.59E-05   | 0  |
| Itgb2     | 6.11E-09   | -0.3151458 | 0.214 | 0.281 | 0.00010048 | 0  |
| Tax1bp1   | 6.21E-09   | -0.2738183 | 0.22  | 0.288 | 0.00010215 | 0  |
| Atp5o.1   | 1.22E-08   | -0.263972  | 0.193 | 0.258 | 0.00020113 | 0  |
| Psm3      | 2.46E-08   | -0.2572012 | 0.194 | 0.258 | 0.00040383 | 0  |
| Ptpn6     | 4.78E-08   | -0.253926  | 0.207 | 0.271 | 0.00078639 | 0  |
| Crip1     | 1.48E-07   | -0.2762579 | 0.718 | 0.721 | 0.00242811 | 0  |
| Prr13     | 1.70E-07   | -0.279168  | 0.219 | 0.279 | 0.00278817 | 0  |
| Gstm1     | 2.39E-06   | -0.3019864 | 0.631 | 0.649 | 0.03925081 | 0  |
| Ighm      | 7.27E-06   | -1.0651042 | 0.409 | 0.416 | 0.11951207 | 0  |
| Rel       | 1.62E-05   | -0.2937213 | 0.245 | 0.289 | 0.266495   | 0  |
| Foxp1     | 0.00025551 | -0.2599801 | 0.238 | 0.273 | 1          | 0  |
| Cd79a.1   | 0          | 2.21949996 | 0.952 | 0.145 | 0          | 1  |
| Ebf1      | 0          | 2.01793429 | 0.649 | 0.069 | 0          | 1  |
| Ccr7      | 0          | 1.73139648 | 0.629 | 0.101 | 0          | 1  |
| Ly6d.1    | 0          | 1.67479096 | 0.789 | 0.235 | 0          | 1  |
| Cd79b     | 0          | 1.67096301 | 0.648 | 0.129 | 0          | 1  |
| Fcmmr     | 0          | 1.64717774 | 0.494 | 0.066 | 0          | 1  |
| H2-DMb1.7 | 2.19E-107  | 1.03868388 | 0.884 | 0.307 | 3.61E-103  | 9  |
| Ighd      | 0          | 1.59920312 | 0.362 | 0.027 | 0          | 1  |
| Ms4a1     | 0          | 1.50122937 | 0.504 | 0.082 | 0          | 1  |
| Fcgr2a    | 0          | 1.4513721  | 0.287 | 0.014 | 0          | 1  |
| Tyrbp.1   | 6.68E-268  | -2.4889703 | 0.072 | 0.689 | 1.10E-263  | 1  |
| Fcgr1g.1  | 3.08E-262  | -2.5884342 | 0.035 | 0.659 | 5.07E-258  | 1  |
| Bank1     | 1.40E-243  | 1.42474186 | 0.494 | 0.112 | 2.30E-239  | 1  |
| Cst3.1    | 3.51E-240  | -2.4754906 | 0.269 | 0.748 | 5.77E-236  | 1  |
| H2-Eb1.11 | 4.09E-24   | 1.02603288 | 1     | 0.706 | 6.72E-20   | 17 |
| Igkc      | 1.16E-212  | 0.5813834  | 0.5   | 0.124 | 1.91E-208  | 1  |
| Lyz2.1    | 5.86E-209  | -3.0905204 | 0.102 | 0.623 | 9.64E-205  | 1  |
| Scd1      | 1.28E-208  | 1.28482793 | 0.285 | 0.034 | 2.10E-204  | 1  |
| Rps27.1   | 9.86E-206  | 0.6883557  | 0.972 | 0.891 | 1.62E-201  | 1  |
| Ahnk.1    | 1.93E-205  | -1.8373706 | 0.068 | 0.619 | 3.18E-201  | 1  |
| Ifitm3.1  | 1.63E-201  | -2.4428477 | 0.025 | 0.562 | 2.68E-197  | 1  |
| Cd37.1    | 6.18E-199  | 1.23760917 | 0.654 | 0.281 | 1.02E-194  | 1  |
| Dusp1.1   | 4.06E-187  | -1.7180288 | 0.167 | 0.672 | 6.68E-183  | 1  |
| Rps20.1   | 1.19E-180  | 0.5127166  | 0.993 | 0.969 | 1.95E-176  | 1  |
| Igk3      | 2.02E-175  | 1.20249606 | 0.371 | 0.078 | 3.33E-171  | 1  |

|            |           |            |       |       |           |   |
|------------|-----------|------------|-------|-------|-----------|---|
| Psap       | 2.61E-173 | -1.4536881 | 0.305 | 0.732 | 4.30E-169 | 1 |
| Gpx1.1     | 5.97E-173 | -1.3964462 | 0.381 | 0.762 | 9.81E-169 | 1 |
| Tmsb4x     | 1.87E-167 | -0.6204146 | 0.986 | 0.994 | 3.07E-163 | 1 |
| Tmem176b.1 | 1.30E-166 | -1.9109455 | 0.024 | 0.502 | 2.14E-162 | 1 |
| Crip1.1    | 6.59E-165 | -1.4581373 | 0.398 | 0.769 | 1.08E-160 | 1 |
| Iglc2      | 1.33E-160 | 1.09560795 | 0.388 | 0.091 | 2.18E-156 | 1 |
| Ccl6.1     | 2.57E-158 | -2.2653315 | 0.014 | 0.473 | 4.23E-154 | 1 |
| Nfkbiz.1   | 3.99E-158 | -1.9635629 | 0.04  | 0.501 | 6.57E-154 | 1 |
| Rps24.1    | 8.76E-158 | 0.43883041 | 0.998 | 0.986 | 1.44E-153 | 1 |
| Cd19       | 2.54E-154 | 1.14751404 | 0.265 | 0.043 | 4.17E-150 | 1 |
| Uba52.1    | 9.74E-154 | 0.45688809 | 0.998 | 0.971 | 1.60E-149 | 1 |
| Ctsb.1     | 5.69E-152 | -1.9537732 | 0.087 | 0.535 | 9.35E-148 | 1 |
| Stk17b.1   | 4.04E-150 | 1.05258335 | 0.689 | 0.399 | 6.65E-146 | 1 |
| Alox5ap.1  | 1.69E-147 | -1.7619867 | 0.016 | 0.455 | 2.78E-143 | 1 |
| Rpl8.1     | 1.53E-146 | 0.50710221 | 0.972 | 0.908 | 2.51E-142 | 1 |
| Ftl1.1     | 4.54E-145 | -1.2347232 | 0.752 | 0.912 | 7.47E-141 | 1 |
| Egr1.1     | 4.79E-143 | -2.028947  | 0.083 | 0.515 | 7.87E-139 | 1 |
| Rpl18a.1   | 1.72E-142 | 0.48276546 | 0.991 | 0.958 | 2.82E-138 | 1 |
| H3f3a.1    | 2.11E-140 | 0.76724418 | 0.859 | 0.72  | 3.47E-136 | 1 |
| Mt1.1      | 2.27E-138 | -2.3124068 | 0.052 | 0.471 | 3.73E-134 | 1 |
| Lgals1.1   | 1.47E-137 | -1.6508403 | 0.034 | 0.459 | 2.41E-133 | 1 |
| Ifitm2.1   | 1.53E-137 | -1.7600065 | 0.025 | 0.446 | 2.52E-133 | 1 |
| Fos.1      | 3.33E-137 | -1.6017468 | 0.282 | 0.672 | 5.48E-133 | 1 |
| Hvcn1      | 7.28E-137 | 1.19480372 | 0.295 | 0.064 | 1.20E-132 | 1 |
| Fosb.1     | 6.00E-133 | -1.4649848 | 0.133 | 0.558 | 9.86E-129 | 1 |
| Rps19.1    | 9.74E-133 | 0.49969109 | 0.978 | 0.926 | 1.60E-128 | 1 |
| Selenop.1  | 1.22E-132 | -2.5159758 | 0.064 | 0.469 | 2.01E-128 | 1 |
| Tagln2     | 1.92E-132 | -1.2595075 | 0.114 | 0.547 | 3.17E-128 | 1 |
| Vim        | 7.02E-129 | -1.217907  | 0.284 | 0.673 | 1.15E-124 | 1 |
| Cd55       | 8.21E-127 | 1.21043123 | 0.288 | 0.066 | 1.35E-122 | 1 |
| Itm2b.1    | 5.93E-126 | -1.0843306 | 0.505 | 0.83  | 9.75E-122 | 1 |
| Npc2.1     | 1.24E-124 | -1.1240952 | 0.14  | 0.569 | 2.05E-120 | 1 |
| Fau.1      | 9.05E-124 | 0.36953993 | 0.998 | 0.991 | 1.49E-119 | 1 |
| Marcksl1.1 | 4.13E-123 | -1.7013504 | 0.09  | 0.487 | 6.80E-119 | 1 |
| Rps15a.1   | 4.06E-122 | 0.4394172  | 0.979 | 0.946 | 6.69E-118 | 1 |
| Grn.1      | 4.79E-121 | -1.5866122 | 0.039 | 0.427 | 7.87E-117 | 1 |
| Csf1r.1    | 1.14E-119 | -1.9088212 | 0.008 | 0.382 | 1.88E-115 | 1 |
| C1qb.1     | 1.50E-116 | -2.721902  | 0.036 | 0.4   | 2.47E-112 | 1 |
| Atf3.1     | 4.38E-116 | -1.5049437 | 0.171 | 0.558 | 7.21E-112 | 1 |
| Tmem176a.1 | 1.86E-115 | -1.553698  | 0.013 | 0.382 | 3.07E-111 | 1 |
| Zfp36.1    | 4.30E-115 | -1.2546825 | 0.313 | 0.657 | 7.08E-111 | 1 |
| Gstm1.1    | 5.52E-113 | 0.76673909 | 0.824 | 0.619 | 9.08E-109 | 1 |
| C1qc.1     | 1.40E-112 | -2.7187136 | 0.025 | 0.381 | 2.30E-108 | 1 |

|            |           |            |       |       |           |   |
|------------|-----------|------------|-------|-------|-----------|---|
| Apoe.1     | 2.62E-112 | -2.7994003 | 0.183 | 0.514 | 4.30E-108 | 1 |
| Rpl9-ps6.1 | 1.19E-111 | 0.45894631 | 0.969 | 0.896 | 1.96E-107 | 1 |
| Rpl13.1    | 1.68E-111 | 0.380288   | 0.996 | 0.979 | 2.76E-107 | 1 |
| Ralgps2    | 6.79E-111 | 1.07498525 | 0.295 | 0.078 | 1.12E-106 | 1 |
| Fxyd5.1    | 3.75E-110 | -1.1512344 | 0.122 | 0.517 | 6.17E-106 | 1 |
| C1qa.1     | 6.52E-108 | -2.5511886 | 0.03  | 0.375 | 1.07E-103 | 1 |
| Ly6e       | 3.61E-107 | 0.5497307  | 0.922 | 0.724 | 5.93E-103 | 1 |
| H2afz.1    | 4.46E-106 | -1.0580254 | 0.259 | 0.638 | 7.34E-102 | 1 |
| Rpl19.1    | 2.19E-105 | 0.39535556 | 0.987 | 0.95  | 3.60E-101 | 1 |
| Nfkbia.1   | 3.06E-105 | -1.2179511 | 0.2   | 0.569 | 5.03E-101 | 1 |
| Klf4.1     | 2.52E-104 | -1.6790286 | 0.065 | 0.422 | 4.14E-100 | 1 |
| Btg1.1     | 4.88E-104 | 0.78860953 | 0.745 | 0.547 | 8.03E-100 | 1 |
| Actg1.1    | 4.95E-104 | -0.6609477 | 0.762 | 0.923 | 8.14E-100 | 1 |
| Ier3.1     | 5.99E-104 | -1.8011442 | 0.027 | 0.371 | 9.85E-100 | 1 |
| Jun.1      | 8.87E-103 | -1.7324126 | 0.153 | 0.509 | 1.46E-98  | 1 |
| H2-Ab1.1   | 2.21E-251 | 1.02496531 | 0.991 | 0.679 | 3.64E-247 | 2 |
| Mrc1.1     | 2.47E-102 | -1.7867292 | 0.014 | 0.35  | 4.06E-98  | 1 |
| Cfp.1      | 4.44E-101 | -1.4464748 | 0.02  | 0.356 | 7.30E-97  | 1 |
| Pf4.1      | 3.71E-100 | -2.5555736 | 0.022 | 0.349 | 6.10E-96  | 1 |
| Marcks.1   | 1.45E-99  | -1.2830458 | 0.034 | 0.377 | 2.39E-95  | 1 |
| Cd74.1     | 2.00E-97  | 0.38569913 | 1     | 0.801 | 3.29E-93  | 1 |
| Rpl13a.1   | 7.01E-96  | 0.52888124 | 0.885 | 0.802 | 1.15E-91  | 1 |
| Pltp.1     | 8.18E-96  | -1.5965107 | 0.049 | 0.38  | 1.35E-91  | 1 |
| Ccl2.1     | 2.48E-94  | -2.2889798 | 0.01  | 0.322 | 4.08E-90  | 1 |
| F13a1.1    | 5.62E-94  | -1.8189862 | 0.009 | 0.32  | 9.24E-90  | 1 |
| Cd68.1     | 5.77E-90  | -1.2999936 | 0.009 | 0.312 | 9.50E-86  | 1 |
| Atox1      | 8.15E-88  | -0.9447038 | 0.148 | 0.503 | 1.34E-83  | 1 |
| Rps3a1.1   | 1.83E-86  | 0.34522009 | 0.983 | 0.961 | 3.01E-82  | 1 |
| Rpsa.1     | 2.02E-86  | 0.36272834 | 0.984 | 0.928 | 3.33E-82  | 1 |
| Anxa5.1    | 2.87E-86  | -1.0416421 | 0.06  | 0.385 | 4.72E-82  | 1 |
| Rps16.1    | 1.18E-85  | 0.32357035 | 0.988 | 0.972 | 1.95E-81  | 1 |
| Rgs10.1    | 2.32E-85  | -1.1632544 | 0.017 | 0.315 | 3.82E-81  | 1 |
| Cd14.1     | 6.79E-84  | -1.5607402 | 0.011 | 0.298 | 1.12E-79  | 1 |
| Mafb.1     | 1.17E-83  | -1.7979468 | 0.014 | 0.302 | 1.92E-79  | 1 |
| Wfdc17.1   | 1.50E-83  | -1.4146961 | 0.063 | 0.37  | 2.46E-79  | 1 |
| Ets1       | 4.74E-83  | 0.92798015 | 0.379 | 0.155 | 7.79E-79  | 1 |
| Mcl1.1     | 8.79E-83  | -0.9647285 | 0.134 | 0.472 | 1.45E-78  | 1 |
| Ctsc.1     | 2.49E-82  | -1.141243  | 0.133 | 0.458 | 4.10E-78  | 1 |
| Mgl2.1     | 2.13E-81  | -1.4746951 | 0.005 | 0.282 | 3.51E-77  | 1 |
| Cxcl2.1    | 3.35E-81  | -2.4600385 | 0.01  | 0.287 | 5.50E-77  | 1 |
| Clec10a.1  | 3.63E-81  | -1.5145997 | 0.005 | 0.282 | 5.97E-77  | 1 |
| Zeb2.1     | 5.86E-81  | -1.1386079 | 0.038 | 0.335 | 9.65E-77  | 1 |
| Fyb.1      | 1.28E-80  | -1.221729  | 0.009 | 0.286 | 2.11E-76  | 1 |

|            |          |            |       |       |          |   |
|------------|----------|------------|-------|-------|----------|---|
| Ptp4a3     | 1.38E-80 | 1.01401254 | 0.301 | 0.107 | 2.28E-76 | 1 |
| Anxa2.1    | 1.43E-80 | -1.1875744 | 0.025 | 0.313 | 2.36E-76 | 1 |
| Mef2c.1    | 4.80E-80 | 0.98937979 | 0.43  | 0.213 | 7.89E-76 | 1 |
| Klf6.1     | 6.00E-79 | -0.9830533 | 0.239 | 0.574 | 9.87E-75 | 1 |
| Ablim1     | 6.48E-79 | 0.9134014  | 0.298 | 0.102 | 1.07E-74 | 1 |
| lfi27l2a.1 | 1.15E-78 | -1.3076402 | 0.135 | 0.443 | 1.89E-74 | 1 |
| Pim1       | 8.64E-78 | -0.8462596 | 0.157 | 0.494 | 1.42E-73 | 1 |
| Tgfb1.1    | 9.91E-78 | -1.2948639 | 0.004 | 0.271 | 1.63E-73 | 1 |
| App.1      | 1.41E-77 | -1.0843299 | 0.026 | 0.311 | 2.31E-73 | 1 |
| Fcgrt.1    | 5.05E-77 | -1.3345143 | 0.019 | 0.293 | 8.31E-73 | 1 |
| Ccl9.1     | 2.30E-75 | -1.2480516 | 0.006 | 0.268 | 3.78E-71 | 1 |
| Rps7.1     | 7.98E-75 | 0.3473192  | 0.981 | 0.935 | 1.31E-70 | 1 |
| Ptms       | 5.24E-74 | -0.9962804 | 0.042 | 0.325 | 8.61E-70 | 1 |
| Lgals3     | 6.12E-74 | -1.1033866 | 0.091 | 0.389 | 1.01E-69 | 1 |
| Tnfaip3    | 7.17E-74 | -0.9710031 | 0.07  | 0.368 | 1.18E-69 | 1 |
| Il1b       | 1.77E-73 | -1.9413319 | 0.017 | 0.279 | 2.91E-69 | 1 |
| Ctsd.1     | 1.98E-73 | -1.1520505 | 0.047 | 0.327 | 3.26E-69 | 1 |
| Efhd2      | 2.35E-73 | -0.9538066 | 0.048 | 0.333 | 3.87E-69 | 1 |
| Serp1.1    | 7.56E-73 | 0.83080874 | 0.542 | 0.351 | 1.24E-68 | 1 |
| Fcgr3.1    | 1.34E-72 | -1.2032742 | 0.006 | 0.26  | 2.20E-68 | 1 |
| Ckb        | 1.89E-72 | -1.1493574 | 0.012 | 0.269 | 3.11E-68 | 1 |
| Dab2.1     | 2.60E-72 | -1.4171812 | 0.005 | 0.256 | 4.27E-68 | 1 |
| Rps5.1     | 3.65E-72 | 0.3268654  | 0.99  | 0.958 | 6.00E-68 | 1 |
| Ms4a6c.1   | 1.62E-71 | -1.1439742 | 0.01  | 0.262 | 2.66E-67 | 1 |
| mt-Atp8    | 1.89E-71 | 0.36860266 | 0.964 | 0.924 | 3.11E-67 | 1 |
| Maf.1      | 4.92E-71 | -1.3598388 | 0.012 | 0.264 | 8.09E-67 | 1 |
| Folr2.1    | 5.32E-71 | -1.7021078 | 0.011 | 0.261 | 8.75E-67 | 1 |
| Hspa8      | 2.35E-70 | -0.5807678 | 0.461 | 0.765 | 3.87E-66 | 1 |
| Rpl6.1     | 3.24E-69 | 0.37755844 | 0.923 | 0.893 | 5.33E-65 | 1 |
| Shisa5.1   | 4.04E-69 | 0.70218686 | 0.614 | 0.427 | 6.64E-65 | 1 |
| Rps8.1     | 4.11E-69 | 0.29583875 | 0.991 | 0.982 | 6.75E-65 | 1 |
| Eef1a1.1   | 1.77E-68 | 0.26871958 | 0.991 | 0.979 | 2.92E-64 | 1 |
| Ccl7.1     | 4.07E-68 | -2.5570786 | 0.016 | 0.26  | 6.70E-64 | 1 |
| Myl6       | 7.70E-68 | -0.6333654 | 0.372 | 0.696 | 1.27E-63 | 1 |
| Zfp36l2    | 2.75E-67 | -0.8206745 | 0.118 | 0.419 | 4.52E-63 | 1 |
| Lamp1.1    | 1.13E-66 | -0.8440333 | 0.152 | 0.454 | 1.85E-62 | 1 |
| Gnai2.1    | 6.79E-66 | -0.6429235 | 0.239 | 0.572 | 1.12E-61 | 1 |
| Emp3       | 3.27E-65 | -0.7429982 | 0.165 | 0.475 | 5.38E-61 | 1 |
| Rassf4.1   | 6.89E-65 | -0.9289473 | 0.03  | 0.279 | 1.13E-60 | 1 |
| Hexa.1     | 7.56E-65 | -0.9484664 | 0.061 | 0.327 | 1.24E-60 | 1 |
| Selplg.1   | 4.03E-64 | -0.8690337 | 0.072 | 0.341 | 6.63E-60 | 1 |
| Itgb1      | 4.33E-64 | -0.9157242 | 0.029 | 0.277 | 7.13E-60 | 1 |
| Zyx.1      | 4.75E-64 | -0.8672288 | 0.04  | 0.297 | 7.82E-60 | 1 |



|           |          |            |       |       |          |   |
|-----------|----------|------------|-------|-------|----------|---|
| Rps3.1    | 2.22E-63 | 0.33098127 | 0.95  | 0.907 | 3.65E-59 | 1 |
| Malat1    | 2.57E-62 | 0.354252   | 0.975 | 0.93  | 4.23E-58 | 1 |
| Gimap6    | 1.07E-61 | 0.81431401 | 0.361 | 0.166 | 1.77E-57 | 1 |
| Cytip.1   | 2.61E-61 | 0.79061832 | 0.493 | 0.302 | 4.29E-57 | 1 |
| Socs3.1   | 3.30E-61 | -0.9624395 | 0.06  | 0.312 | 5.43E-57 | 1 |
| Rpl12.1   | 5.14E-61 | 0.42382348 | 0.846 | 0.749 | 8.46E-57 | 1 |
| Junb.1    | 1.75E-60 | -0.5273991 | 0.684 | 0.867 | 2.87E-56 | 1 |
| Ifngr1    | 3.12E-60 | -0.8047556 | 0.135 | 0.42  | 5.14E-56 | 1 |
| Ninj1.1   | 4.65E-60 | -1.1221031 | 0.038 | 0.273 | 7.65E-56 | 1 |
| Trib1.1   | 1.38E-59 | -0.9300848 | 0.026 | 0.257 | 2.26E-55 | 1 |
| Cbr2.1    | 2.72E-59 | -1.3685881 | 0.042 | 0.273 | 4.47E-55 | 1 |
| Pld4.1    | 2.57E-58 | -0.767547  | 0.095 | 0.36  | 4.23E-54 | 1 |
| Ptprcap.1 | 6.30E-58 | 0.65338512 | 0.452 | 0.237 | 1.04E-53 | 1 |
| Rpl26.1   | 2.05E-57 | 0.35525083 | 0.921 | 0.895 | 3.37E-53 | 1 |
| H2-Q7.5   | 1.59E-64 | 1.01933349 | 0.581 | 0.238 | 2.62E-60 | 7 |
| Cdkn1a    | 3.82E-56 | -1.0072054 | 0.035 | 0.261 | 6.28E-52 | 1 |
| Cebpb.1   | 1.57E-55 | -0.9689727 | 0.112 | 0.362 | 2.58E-51 | 1 |
| Rps10.1   | 2.24E-55 | 0.2783644  | 0.98  | 0.953 | 3.69E-51 | 1 |
| Plbd1     | 4.65E-55 | -0.9704917 | 0.044 | 0.27  | 7.65E-51 | 1 |
| Jund.1    | 5.79E-55 | -0.653871  | 0.449 | 0.718 | 9.52E-51 | 1 |
| Ltb.1     | 9.07E-55 | 0.68224908 | 0.374 | 0.181 | 1.49E-50 | 1 |
| Btg2.1    | 1.28E-54 | -0.5611992 | 0.433 | 0.707 | 2.10E-50 | 1 |
| S100a10.1 | 2.73E-54 | -0.719246  | 0.218 | 0.496 | 4.49E-50 | 1 |
| Rpl27a.1  | 3.16E-54 | 0.3421694  | 0.926 | 0.883 | 5.19E-50 | 1 |
| Rpl34.1   | 2.34E-52 | 0.28680791 | 0.96  | 0.944 | 3.84E-48 | 1 |
| Aplp2.1   | 2.46E-52 | -0.8084261 | 0.043 | 0.264 | 4.04E-48 | 1 |
| Atp2b1.1  | 3.29E-52 | -0.6687502 | 0.121 | 0.381 | 5.41E-48 | 1 |
| Rrbp1.1   | 4.84E-52 | -0.6529051 | 0.122 | 0.383 | 7.97E-48 | 1 |
| Ehd4.1    | 1.73E-51 | -0.7954427 | 0.067 | 0.297 | 2.84E-47 | 1 |
| Sem1      | 1.74E-51 | -0.5460659 | 0.287 | 0.589 | 2.86E-47 | 1 |
| Tspo      | 2.94E-50 | -0.588844  | 0.18  | 0.46  | 4.83E-46 | 1 |
| Itgb2.1   | 4.60E-49 | -0.7123142 | 0.07  | 0.297 | 7.57E-45 | 1 |
| Pde4b.1   | 6.14E-49 | 0.69642528 | 0.542 | 0.399 | 1.01E-44 | 1 |
| Gadd45b.1 | 7.92E-49 | -0.8348005 | 0.062 | 0.279 | 1.30E-44 | 1 |
| Akr1a1.1  | 8.51E-49 | -0.5981627 | 0.129 | 0.386 | 1.40E-44 | 1 |
| Neat1.1   | 1.13E-48 | -0.8423648 | 0.121 | 0.358 | 1.86E-44 | 1 |
| Rps26.1   | 2.55E-48 | 0.29173808 | 0.954 | 0.932 | 4.20E-44 | 1 |
| Swap70    | 2.56E-48 | 0.82063577 | 0.269 | 0.12  | 4.22E-44 | 1 |
| Rps4x.1   | 3.01E-48 | 0.26481611 | 0.981 | 0.96  | 4.95E-44 | 1 |
| Serf2     | 3.62E-48 | -0.4355017 | 0.541 | 0.795 | 5.96E-44 | 1 |
| Clta.1    | 5.63E-47 | -0.5289912 | 0.303 | 0.586 | 9.27E-43 | 1 |
| Coro1a.1  | 5.75E-47 | 0.46469494 | 0.741 | 0.621 | 9.46E-43 | 1 |
| Il2rg.1   | 6.86E-47 | 0.69441888 | 0.431 | 0.262 | 1.13E-42 | 1 |

|            |          |            |       |       |          |   |
|------------|----------|------------|-------|-------|----------|---|
| Rpl7.1     | 8.92E-47 | 0.36638171 | 0.863 | 0.838 | 1.47E-42 | 1 |
| Rpl35.1    | 2.80E-46 | 0.30180067 | 0.936 | 0.923 | 4.60E-42 | 1 |
| Lgmn.1     | 3.30E-46 | -0.8774774 | 0.09  | 0.308 | 5.44E-42 | 1 |
| Vamp8.1    | 8.67E-46 | -0.564983  | 0.127 | 0.374 | 1.43E-41 | 1 |
| Tln1       | 3.99E-45 | -0.520324  | 0.193 | 0.463 | 6.56E-41 | 1 |
| Pold4      | 9.30E-45 | 0.81445292 | 0.297 | 0.148 | 1.53E-40 | 1 |
| Sat1.1     | 1.10E-43 | -0.6716834 | 0.136 | 0.37  | 1.82E-39 | 1 |
| Atp6v0c.1  | 1.11E-43 | -0.5986973 | 0.204 | 0.457 | 1.83E-39 | 1 |
| Gltp.1     | 5.73E-43 | -0.5733391 | 0.074 | 0.286 | 9.43E-39 | 1 |
| Rpl3.1     | 1.36E-42 | 0.32082501 | 0.879 | 0.831 | 2.24E-38 | 1 |
| Tsc22d3    | 1.70E-42 | 0.74451778 | 0.334 | 0.182 | 2.79E-38 | 1 |
| Gng5.1     | 1.73E-42 | -0.4249121 | 0.342 | 0.635 | 2.84E-38 | 1 |
| S100a13    | 1.90E-42 | -0.6327241 | 0.059 | 0.258 | 3.12E-38 | 1 |
| Fth1.1     | 1.35E-41 | -0.5265467 | 0.944 | 0.96  | 2.21E-37 | 1 |
| Man2b1.1   | 7.97E-41 | -0.5637507 | 0.108 | 0.328 | 1.31E-36 | 1 |
| Arpc1b     | 2.08E-40 | -0.4363286 | 0.393 | 0.658 | 3.42E-36 | 1 |
| Rac1       | 9.39E-40 | -0.4373498 | 0.207 | 0.468 | 1.54E-35 | 1 |
| Rps13.1    | 1.20E-39 | 0.32847455 | 0.863 | 0.826 | 1.98E-35 | 1 |
| Smdt1      | 2.10E-39 | -0.5062217 | 0.152 | 0.383 | 3.45E-35 | 1 |
| Arf5       | 2.66E-39 | -0.4687575 | 0.193 | 0.445 | 4.37E-35 | 1 |
| Kdm6b.1    | 7.36E-39 | -0.5473812 | 0.121 | 0.341 | 1.21E-34 | 1 |
| Rpl11.1    | 1.18E-38 | 0.26648076 | 0.952 | 0.922 | 1.95E-34 | 1 |
| Snx3.1     | 1.80E-38 | -0.4892002 | 0.148 | 0.381 | 2.96E-34 | 1 |
| Atpif1.1   | 2.23E-38 | -0.5090666 | 0.123 | 0.344 | 3.67E-34 | 1 |
| Cd52.1     | 2.70E-38 | 0.35260661 | 0.845 | 0.717 | 4.44E-34 | 1 |
| Kctd12.1   | 8.04E-38 | -0.6132255 | 0.175 | 0.4   | 1.32E-33 | 1 |
| Cyth4.1    | 2.82E-37 | -0.5521782 | 0.068 | 0.257 | 4.64E-33 | 1 |
| Vps37b.1   | 3.38E-37 | 0.62988822 | 0.382 | 0.223 | 5.55E-33 | 1 |
| Zfand5.1   | 4.79E-37 | -0.6195798 | 0.092 | 0.288 | 7.88E-33 | 1 |
| Gm2a.1     | 6.28E-37 | -0.6483975 | 0.113 | 0.313 | 1.03E-32 | 1 |
| Rps18.1    | 9.03E-37 | 0.28049698 | 0.889 | 0.867 | 1.49E-32 | 1 |
| Txnip      | 1.38E-36 | 0.67893456 | 0.37  | 0.222 | 2.28E-32 | 1 |
| Dbi        | 2.95E-36 | -0.479188  | 0.112 | 0.319 | 4.85E-32 | 1 |
| Ctsa.1     | 1.11E-35 | -0.5267486 | 0.109 | 0.311 | 1.83E-31 | 1 |
| Cstb.1     | 1.28E-35 | -0.5579901 | 0.09  | 0.283 | 2.11E-31 | 1 |
| AW112010.1 | 1.48E-35 | -1.0847516 | 0.103 | 0.285 | 2.43E-31 | 1 |
| Sec61b.1   | 1.59E-35 | -0.43343   | 0.262 | 0.516 | 2.61E-31 | 1 |
| Rpl36.1    | 3.30E-35 | 0.26422674 | 0.9   | 0.9   | 5.44E-31 | 1 |
| Napsa.1    | 4.77E-35 | 0.61934877 | 0.39  | 0.245 | 7.84E-31 | 1 |
| mt-Nd4l    | 5.37E-35 | 0.2825418  | 0.917 | 0.899 | 8.83E-31 | 1 |
| Pomp       | 1.26E-34 | -0.4114304 | 0.136 | 0.351 | 2.06E-30 | 1 |
| Fcgr2b.1   | 2.67E-34 | -0.5799225 | 0.112 | 0.304 | 4.40E-30 | 1 |
| Uqcr11     | 3.45E-34 | -0.4127093 | 0.113 | 0.316 | 5.68E-30 | 1 |

|           |          |            |       |       |          |   |
|-----------|----------|------------|-------|-------|----------|---|
| Spi1.1    | 1.89E-33 | -0.4783474 | 0.128 | 0.332 | 3.10E-29 | 1 |
| Rps27l    | 4.25E-33 | -0.4479012 | 0.13  | 0.334 | 6.98E-29 | 1 |
| Hmgn1     | 4.48E-33 | 0.74810084 | 0.338 | 0.213 | 7.38E-29 | 1 |
| Retnla    | 6.57E-33 | -2.9439881 | 0.104 | 0.263 | 1.08E-28 | 1 |
| Atp1a1    | 6.93E-33 | -0.4977655 | 0.074 | 0.251 | 1.14E-28 | 1 |
| Eef2.1    | 1.01E-32 | 0.35846488 | 0.768 | 0.726 | 1.66E-28 | 1 |
| Clic4.1   | 1.91E-32 | -0.5259333 | 0.093 | 0.276 | 3.15E-28 | 1 |
| Limd2.1   | 3.01E-32 | 0.58422821 | 0.461 | 0.34  | 4.96E-28 | 1 |
| lfrd1.1   | 8.94E-32 | -0.4868651 | 0.086 | 0.263 | 1.47E-27 | 1 |
| Pitpna    | 9.35E-32 | -0.4600667 | 0.083 | 0.262 | 1.54E-27 | 1 |
| Rps21.1   | 1.62E-31 | 0.26059443 | 0.891 | 0.881 | 2.66E-27 | 1 |
| Ccnl1.1   | 2.89E-31 | -0.4554505 | 0.135 | 0.332 | 4.76E-27 | 1 |
| Cox7c     | 4.64E-31 | -0.364952  | 0.236 | 0.476 | 7.64E-27 | 1 |
| Sp140     | 4.72E-31 | 0.72556935 | 0.274 | 0.154 | 7.77E-27 | 1 |
| Rtn4.1    | 4.86E-31 | -0.4192425 | 0.093 | 0.275 | 8.00E-27 | 1 |
| Cd83.1    | 1.07E-30 | 0.45510703 | 0.576 | 0.455 | 1.76E-26 | 1 |
| Txn1      | 1.23E-30 | -0.4788371 | 0.097 | 0.274 | 2.02E-26 | 1 |
| Fkbp1a.1  | 1.33E-30 | -0.4461992 | 0.097 | 0.276 | 2.18E-26 | 1 |
| Rpl29.1   | 8.59E-30 | 0.26296533 | 0.878 | 0.854 | 1.41E-25 | 1 |
| Arhgdib.1 | 1.96E-29 | 0.42819579 | 0.638 | 0.589 | 3.23E-25 | 1 |
| mt-Nd5    | 4.12E-29 | 0.38663502 | 0.69  | 0.655 | 6.77E-25 | 1 |
| Tomm7     | 4.90E-29 | -0.3584121 | 0.153 | 0.35  | 8.05E-25 | 1 |
| Rbms1.1   | 1.30E-28 | -0.4133537 | 0.104 | 0.28  | 2.14E-24 | 1 |
| Rpl10a.1  | 1.44E-28 | 0.25640736 | 0.883 | 0.861 | 2.37E-24 | 1 |
| Rel.1     | 4.85E-28 | 0.68137143 | 0.377 | 0.266 | 7.97E-24 | 1 |
| Nrros.1   | 5.39E-28 | -0.4391177 | 0.127 | 0.308 | 8.86E-24 | 1 |
| Nfkbid.1  | 6.18E-28 | -0.477551  | 0.098 | 0.266 | 1.02E-23 | 1 |
| Arpc2     | 1.65E-27 | -0.3151844 | 0.466 | 0.697 | 2.72E-23 | 1 |
| Cybb.1    | 1.86E-27 | -0.4953322 | 0.169 | 0.353 | 3.06E-23 | 1 |
| Plek.1    | 3.16E-27 | -0.4202678 | 0.179 | 0.372 | 5.20E-23 | 1 |
| Foxp1.1   | 3.18E-27 | 0.69548565 | 0.359 | 0.252 | 5.23E-23 | 1 |
| Fam107b   | 4.99E-27 | 0.69483859 | 0.278 | 0.166 | 8.20E-23 | 1 |
| Glud1     | 5.54E-27 | -0.3554537 | 0.115 | 0.292 | 9.11E-23 | 1 |
| Cox6a1    | 9.83E-27 | -0.3266555 | 0.233 | 0.457 | 1.62E-22 | 1 |
| Atp6v0b.1 | 1.06E-26 | -0.3689594 | 0.185 | 0.386 | 1.74E-22 | 1 |
| Dnaja1    | 2.27E-26 | -0.4180613 | 0.111 | 0.278 | 3.73E-22 | 1 |
| Ywhah     | 5.97E-26 | -0.3759905 | 0.115 | 0.286 | 9.82E-22 | 1 |
| Gnb2      | 8.23E-26 | -0.3204804 | 0.238 | 0.456 | 1.35E-21 | 1 |
| Uqcrq     | 8.46E-26 | -0.3160636 | 0.167 | 0.362 | 1.39E-21 | 1 |
| Msn.1     | 1.48E-25 | 0.5054808  | 0.501 | 0.425 | 2.44E-21 | 1 |
| Tpm3      | 1.65E-25 | -0.2930852 | 0.289 | 0.525 | 2.71E-21 | 1 |
| Rpl14.1   | 2.46E-25 | 0.27058905 | 0.816 | 0.782 | 4.04E-21 | 1 |
| Ucp2.1    | 3.06E-25 | -0.3006124 | 0.405 | 0.627 | 5.03E-21 | 1 |

|              |          |            |       |       |          |    |
|--------------|----------|------------|-------|-------|----------|----|
| Rps6.1       | 6.52E-25 | 0.27893164 | 0.799 | 0.767 | 1.07E-20 | 1  |
| Prdx1.1      | 7.45E-25 | -0.3328415 | 0.202 | 0.406 | 1.23E-20 | 1  |
| Ddx3x.1      | 8.09E-25 | -0.4040124 | 0.123 | 0.29  | 1.33E-20 | 1  |
| Anapc11      | 8.26E-25 | -0.3323379 | 0.097 | 0.254 | 1.36E-20 | 1  |
| Ostf1        | 2.42E-24 | -0.3304879 | 0.154 | 0.338 | 3.98E-20 | 1  |
| Cox5a        | 2.44E-24 | -0.3038989 | 0.205 | 0.407 | 4.01E-20 | 1  |
| Ptma.1       | 3.04E-24 | 0.28388054 | 0.811 | 0.779 | 4.99E-20 | 1  |
| Erp29        | 4.09E-24 | -0.3020997 | 0.195 | 0.393 | 6.72E-20 | 1  |
| Cltc.1       | 6.90E-24 | -0.3902714 | 0.175 | 0.355 | 1.14E-19 | 1  |
| H2-Ob.2      | 1.37E-32 | 0.99058097 | 0.538 | 0.148 | 2.25E-28 | 13 |
| H2afy.1      | 1.42E-23 | -0.3792839 | 0.115 | 0.273 | 2.34E-19 | 1  |
| Hsp90b1      | 2.17E-23 | -0.3549956 | 0.287 | 0.504 | 3.57E-19 | 1  |
| Eif3f.1      | 4.14E-23 | 0.38287095 | 0.647 | 0.613 | 6.81E-19 | 1  |
| Coro1b.1     | 4.80E-23 | -0.317     | 0.108 | 0.265 | 7.90E-19 | 1  |
| Rpl4.1       | 5.84E-23 | 0.34420964 | 0.666 | 0.641 | 9.61E-19 | 1  |
| Eif4a1       | 6.84E-23 | -0.2946672 | 0.164 | 0.347 | 1.12E-18 | 1  |
| Capzb.1      | 6.84E-23 | -0.3062012 | 0.287 | 0.502 | 1.13E-18 | 1  |
| Abracl.1     | 7.14E-23 | -0.3086074 | 0.119 | 0.282 | 1.17E-18 | 1  |
| Hint1        | 9.53E-23 | -0.2763871 | 0.27  | 0.489 | 1.57E-18 | 1  |
| Ptp4a2       | 1.14E-22 | -0.3252005 | 0.149 | 0.32  | 1.88E-18 | 1  |
| 2010107E04Ri | 1.52E-22 | -0.3178973 | 0.152 | 0.325 | 2.51E-18 | 1  |
| Ly6a         | 1.80E-22 | 0.52560497 | 0.273 | 0.16  | 2.96E-18 | 1  |
| Ppdpf        | 2.17E-22 | 0.64632306 | 0.271 | 0.172 | 3.56E-18 | 1  |
| Pdia3        | 3.66E-22 | -0.2924589 | 0.203 | 0.395 | 6.01E-18 | 1  |
| Tmem50a      | 3.92E-22 | -0.2934704 | 0.187 | 0.37  | 6.46E-18 | 1  |
| Calm1        | 3.95E-22 | -0.2936338 | 0.547 | 0.743 | 6.49E-18 | 1  |
| Rpl36a.1     | 3.96E-22 | 0.25133154 | 0.786 | 0.757 | 6.51E-18 | 1  |
| Cox6c        | 7.90E-22 | -0.2783419 | 0.268 | 0.475 | 1.30E-17 | 1  |
| Canx.1       | 9.09E-22 | -0.2665743 | 0.141 | 0.309 | 1.50E-17 | 1  |
| Gsta4        | 1.72E-21 | 0.59156421 | 0.315 | 0.212 | 2.82E-17 | 1  |
| Mat2a.1      | 2.21E-21 | -0.368599  | 0.114 | 0.262 | 3.64E-17 | 1  |
| Ssr4         | 2.23E-21 | -0.2729972 | 0.205 | 0.395 | 3.67E-17 | 1  |
| Ezr.1        | 3.87E-21 | 0.63823226 | 0.319 | 0.224 | 6.36E-17 | 1  |
| Pou2f2       | 4.25E-21 | 0.60735073 | 0.282 | 0.183 | 6.99E-17 | 1  |
| Ier2.1       | 7.43E-21 | -0.4367228 | 0.384 | 0.582 | 1.22E-16 | 1  |
| Capns1       | 1.09E-20 | -0.2971963 | 0.115 | 0.262 | 1.79E-16 | 1  |
| Smim14       | 1.29E-20 | 0.63569642 | 0.264 | 0.17  | 2.12E-16 | 1  |
| Calm2.1      | 1.29E-20 | -0.2924847 | 0.222 | 0.412 | 2.13E-16 | 1  |
| Ctsz.1       | 1.43E-20 | -0.2963269 | 0.198 | 0.376 | 2.36E-16 | 1  |
| Rap1a        | 2.19E-20 | -0.2586601 | 0.135 | 0.296 | 3.60E-16 | 1  |
| Serinc3.1    | 2.32E-20 | -0.4081317 | 0.213 | 0.379 | 3.81E-16 | 1  |
| Arhgap45.1   | 4.33E-20 | 0.56642406 | 0.39  | 0.304 | 7.13E-16 | 1  |
| Capza2       | 4.34E-20 | -0.2789628 | 0.127 | 0.278 | 7.13E-16 | 1  |

|            |            |            |       |       |            |    |
|------------|------------|------------|-------|-------|------------|----|
| Psmc2.1    | 4.45E-20   | -0.2753381 | 0.183 | 0.358 | 7.32E-16   | 1  |
| Prdx5      | 4.86E-20   | -0.3305769 | 0.186 | 0.358 | 7.99E-16   | 1  |
| P4hb       | 7.15E-20   | -0.2505407 | 0.11  | 0.256 | 1.18E-15   | 1  |
| Sp100      | 5.66E-19   | 0.60734696 | 0.296 | 0.207 | 9.32E-15   | 1  |
| Sdcbp.1    | 7.11E-19   | -0.2854565 | 0.144 | 0.295 | 1.17E-14   | 1  |
| Rnaset2a.1 | 1.37E-18   | -0.2717768 | 0.146 | 0.299 | 2.26E-14   | 1  |
| Ptpn18     | 1.54E-18   | -0.2678083 | 0.435 | 0.641 | 2.54E-14   | 1  |
| Myl12b.1   | 3.49E-18   | 0.40774813 | 0.539 | 0.503 | 5.75E-14   | 1  |
| Ppp1r15a.1 | 5.60E-18   | -0.2973775 | 0.215 | 0.378 | 9.20E-14   | 1  |
| Adgre5.1   | 1.44E-17   | -0.3110491 | 0.125 | 0.259 | 2.38E-13   | 1  |
| Ptpn6.1    | 1.03E-16   | 0.5437377  | 0.327 | 0.248 | 1.70E-12   | 1  |
| S100a11.1  | 1.32E-16   | -0.2997835 | 0.257 | 0.42  | 2.17E-12   | 1  |
| Bri3.1     | 1.88E-16   | -0.2649949 | 0.229 | 0.393 | 3.10E-12   | 1  |
| Ier5.1     | 2.98E-16   | -0.2767568 | 0.231 | 0.392 | 4.90E-12   | 1  |
| Cd81.1     | 4.93E-16   | -0.3208696 | 0.167 | 0.304 | 8.11E-12   | 1  |
| Arhgef1    | 5.95E-16   | 0.55670659 | 0.284 | 0.204 | 9.79E-12   | 1  |
| Rbm39.1    | 8.61E-16   | 0.37987911 | 0.545 | 0.529 | 1.42E-11   | 1  |
| Ubc.1      | 6.83E-15   | -0.2585395 | 0.379 | 0.565 | 1.12E-10   | 1  |
| Dennd4a.1  | 1.08E-14   | 0.53917862 | 0.307 | 0.234 | 1.78E-10   | 1  |
| Cnbp.1     | 5.78E-14   | 0.4470817  | 0.457 | 0.425 | 9.50E-10   | 1  |
| Lsp1.1     | 4.51E-13   | -0.3305902 | 0.283 | 0.413 | 7.42E-09   | 1  |
| Apobec3    | 6.26E-13   | 0.50224472 | 0.254 | 0.184 | 1.03E-08   | 1  |
| S100a6.1   | 6.79E-13   | -0.3257992 | 0.665 | 0.765 | 1.12E-08   | 1  |
| Zfp36l1.1  | 1.08E-12   | 0.28768198 | 0.568 | 0.522 | 1.78E-08   | 1  |
| Rac2.1     | 3.49E-12   | 0.31024306 | 0.52  | 0.475 | 5.73E-08   | 1  |
| Kmt2e.1    | 1.76E-10   | 0.47052832 | 0.317 | 0.263 | 2.90E-06   | 1  |
| Macf1.1    | 2.12E-10   | 0.48232262 | 0.294 | 0.237 | 3.48E-06   | 1  |
| Rpl21.1    | 2.13E-10   | 0.26900216 | 0.655 | 0.681 | 3.50E-06   | 1  |
| Syk        | 2.36E-09   | 0.49037775 | 0.256 | 0.205 | 3.89E-05   | 1  |
| Polr2a     | 1.27E-08   | 0.4645302  | 0.258 | 0.209 | 0.00020972 | 1  |
| Irf8       | 2.93E-08   | 0.27757357 | 0.286 | 0.223 | 0.000482   | 1  |
| Lyn        | 5.85E-08   | 0.45306805 | 0.278 | 0.236 | 0.00096297 | 1  |
| Snx5.1     | 1.14E-05   | 0.35833719 | 0.335 | 0.314 | 0.18833883 | 1  |
| Ncl        | 0.00012349 | 0.33043232 | 0.372 | 0.375 | 1          | 1  |
| Tax1bp1.1  | 0.00127888 | 0.37660427 | 0.28  | 0.274 | 1          | 1  |
| Ypel3      | 0.00335012 | 0.30411596 | 0.304 | 0.306 | 1          | 1  |
| Eef1g.1    | 0.00489109 | 0.28665492 | 0.359 | 0.378 | 1          | 1  |
| Gdi2       | 0.00824062 | 0.27871291 | 0.357 | 0.378 | 1          | 1  |
| Cd209a     | 0          | 1.91455752 | 0.759 | 0.092 | 0          | 2  |
| Tnip3      | 0          | 1.6379445  | 0.634 | 0.073 | 0          | 2  |
| Tnfsf9     | 6.68E-303  | 1.35077595 | 0.422 | 0.042 | 1.10E-298  | 2  |
| Cd209c     | 7.67E-260  | 1.02113267 | 0.281 | 0.017 | 1.26E-255  | 2  |
| H2-Q7.10   | 2.66E-19   | 0.9796681  | 0.608 | 0.25  | 4.38E-15   | 15 |

|           |           |            |       |       |           |    |
|-----------|-----------|------------|-------|-------|-----------|----|
| Plbd1.1   | 6.77E-237 | 1.12069278 | 0.719 | 0.19  | 1.11E-232 | 2  |
| Gm2a.2    | 1.98E-231 | 1.15598832 | 0.767 | 0.236 | 3.26E-227 | 2  |
| Il1b.1    | 4.17E-222 | 1.23564449 | 0.707 | 0.196 | 6.85E-218 | 2  |
| Olfm1     | 5.13E-222 | 1.14896212 | 0.442 | 0.071 | 8.44E-218 | 2  |
| Lsp1.2    | 2.09E-210 | 1.06267041 | 0.865 | 0.347 | 3.44E-206 | 2  |
| H2-Ab1.12 | 5.04E-22  | 0.97491939 | 1     | 0.707 | 8.29E-18  | 17 |
| Cd74.2    | 3.94E-203 | 0.82036814 | 0.995 | 0.809 | 6.49E-199 | 2  |
| H2-Aa.13  | 8.93E-16  | 0.96463422 | 1     | 0.742 | 1.47E-11  | 18 |
| Crip1.2   | 1.81E-194 | 0.88606625 | 0.985 | 0.692 | 2.98E-190 | 2  |
| Tmsb4x.1  | 2.34E-173 | 0.53280747 | 1     | 0.992 | 3.84E-169 | 2  |
| Ly6e.1    | 6.97E-172 | -1.4812618 | 0.349 | 0.793 | 1.15E-167 | 2  |
| Cbfa2t3   | 4.82E-171 | 1.00868156 | 0.495 | 0.116 | 7.94E-167 | 2  |
| Ckb.1     | 5.34E-159 | 0.90565624 | 0.633 | 0.193 | 8.79E-155 | 2  |
| Ccnd1     | 3.80E-157 | 0.98986365 | 0.44  | 0.099 | 6.25E-153 | 2  |
| H2-DMb2.8 | 4.13E-30  | 0.95437913 | 0.664 | 0.236 | 6.79E-26  | 13 |
| Etv3      | 5.15E-147 | 1.0095595  | 0.515 | 0.144 | 8.47E-143 | 2  |
| H2afy.2   | 5.04E-145 | 0.89802504 | 0.63  | 0.213 | 8.29E-141 | 2  |
| Bhlhe40   | 1.06E-135 | 0.8571684  | 0.519 | 0.148 | 1.74E-131 | 2  |
| H2-Aa.12  | 6.02E-23  | 0.93512556 | 1     | 0.741 | 9.90E-19  | 17 |
| Bcl2a1d   | 4.09E-131 | 0.87917149 | 0.467 | 0.127 | 6.73E-127 | 2  |
| Slamf9    | 1.05E-130 | 0.84466162 | 0.378 | 0.084 | 1.72E-126 | 2  |
| Avpi1     | 3.11E-129 | 0.93780098 | 0.344 | 0.071 | 5.12E-125 | 2  |
| Cst3.2    | 2.98E-126 | 0.59269228 | 0.993 | 0.653 | 4.90E-122 | 2  |
| Syng2.1   | 1.61E-125 | 0.86571592 | 0.595 | 0.211 | 2.65E-121 | 2  |
| Apoe.2    | 2.44E-125 | -3.6989216 | 0.052 | 0.515 | 4.01E-121 | 2  |
| Napsa.2   | 3.19E-125 | 0.82067894 | 0.631 | 0.225 | 5.24E-121 | 2  |
| Nfkbia.2  | 3.63E-123 | 0.83611483 | 0.849 | 0.485 | 5.98E-119 | 2  |
| Actg1.2   | 2.27E-122 | 0.54210894 | 0.993 | 0.892 | 3.74E-118 | 2  |
| Clec4b1   | 3.99E-121 | 0.79617343 | 0.333 | 0.07  | 6.57E-117 | 2  |
| Atox1.1   | 6.67E-114 | 0.75496215 | 0.81  | 0.419 | 1.10E-109 | 2  |
| Lgals3.1  | 9.36E-114 | 0.65738138 | 0.739 | 0.309 | 1.54E-109 | 2  |
| Gng10     | 2.24E-106 | 0.83653494 | 0.519 | 0.181 | 3.69E-102 | 2  |
| Lmo1      | 4.54E-106 | 0.69752864 | 0.26  | 0.048 | 7.47E-102 | 2  |
| Alcam     | 3.33E-102 | 0.7229639  | 0.26  | 0.051 | 5.48E-98  | 2  |
| H3f3b.1   | 1.41E-101 | -0.7656539 | 0.82  | 0.91  | 2.32E-97  | 2  |
| Slamf7    | 3.04E-100 | 0.76100605 | 0.371 | 0.102 | 5.00E-96  | 2  |
| Ifitm3.2  | 3.26E-97  | 0.53245755 | 0.895 | 0.448 | 5.36E-93  | 2  |
| Mgl2.2    | 1.15E-96  | 0.90988462 | 0.545 | 0.214 | 1.90E-92  | 2  |
| Fxyd5.2   | 2.04E-95  | 0.63269985 | 0.812 | 0.428 | 3.36E-91  | 2  |
| Traf1     | 3.73E-95  | 0.68763897 | 0.401 | 0.118 | 6.14E-91  | 2  |
| Alox5ap.2 | 1.63E-94  | 0.60877015 | 0.781 | 0.357 | 2.68E-90  | 2  |
| Vim.1     | 1.15E-91  | 0.68229282 | 0.897 | 0.593 | 1.90E-87  | 2  |
| Ltb4r1    | 2.59E-91  | 0.60307195 | 0.275 | 0.06  | 4.27E-87  | 2  |

|           |          |            |       |       |          |   |
|-----------|----------|------------|-------|-------|----------|---|
| Zyx.2     | 4.74E-91 | 0.71365433 | 0.572 | 0.23  | 7.79E-87 | 2 |
| Psap.1    | 4.50E-90 | 0.56484403 | 0.948 | 0.647 | 7.40E-86 | 2 |
| S100a4    | 1.17E-89 | 0.63395003 | 0.46  | 0.152 | 1.93E-85 | 2 |
| Ccr2      | 6.46E-88 | 0.66184372 | 0.488 | 0.171 | 1.06E-83 | 2 |
| Ptms.1    | 3.98E-86 | 0.71235459 | 0.593 | 0.256 | 6.55E-82 | 2 |
| Gpx1.2    | 7.40E-86 | 0.43576375 | 0.972 | 0.684 | 1.22E-81 | 2 |
| Ear2      | 2.49E-85 | 0.72881697 | 0.285 | 0.068 | 4.09E-81 | 2 |
| Gsn       | 9.04E-85 | 0.66845063 | 0.389 | 0.123 | 1.49E-80 | 2 |
| Ccdc88a   | 1.02E-81 | 0.6705982  | 0.308 | 0.084 | 1.68E-77 | 2 |
| C1qc.2    | 2.38E-81 | -2.7548077 | 0.019 | 0.367 | 3.91E-77 | 2 |
| Pim1.1    | 1.54E-80 | 0.60637928 | 0.768 | 0.416 | 2.53E-76 | 2 |
| Rplp0.1   | 7.07E-80 | 0.38040623 | 0.981 | 0.895 | 1.16E-75 | 2 |
| S100a6.2  | 1.79E-79 | 0.42129351 | 0.96  | 0.73  | 2.95E-75 | 2 |
| Gpr132.1  | 3.99E-79 | 0.69894202 | 0.495 | 0.196 | 6.57E-75 | 2 |
| C1qb.2    | 4.60E-79 | -2.6466636 | 0.044 | 0.385 | 7.57E-75 | 2 |
| Cdkn1a.1  | 2.26E-76 | 0.74430547 | 0.501 | 0.203 | 3.73E-72 | 2 |
| Itm2b.2   | 6.65E-76 | -1.0513629 | 0.708 | 0.796 | 1.09E-71 | 2 |
| Rpl28.1   | 3.70E-75 | 0.38710296 | 0.977 | 0.907 | 6.09E-71 | 2 |
| C1qa.2    | 6.33E-75 | -2.562342  | 0.033 | 0.361 | 1.04E-70 | 2 |
| Rps11.1   | 9.63E-74 | 0.33582601 | 0.985 | 0.965 | 1.58E-69 | 2 |
| mt-Cytb   | 1.18E-72 | -0.4987135 | 0.907 | 0.94  | 1.93E-68 | 2 |
| Wfdc17.2  | 6.03E-71 | 0.42947206 | 0.651 | 0.296 | 9.91E-67 | 2 |
| Anxa2.2   | 8.05E-71 | 0.56067105 | 0.569 | 0.244 | 1.32E-66 | 2 |
| Csrnp1.1  | 2.98E-70 | 0.63334836 | 0.485 | 0.196 | 4.91E-66 | 2 |
| Pf4.2     | 7.56E-69 | -2.5696351 | 0.028 | 0.336 | 1.24E-64 | 2 |
| Clic4.2   | 9.51E-69 | 0.69575503 | 0.507 | 0.225 | 1.56E-64 | 2 |
| Icam1.1   | 1.94E-65 | 0.72318859 | 0.402 | 0.152 | 3.19E-61 | 2 |
| Bri3bp    | 1.04E-64 | 0.5532775  | 0.322 | 0.105 | 1.71E-60 | 2 |
| Hfe       | 9.80E-64 | 0.61495678 | 0.288 | 0.088 | 1.61E-59 | 2 |
| F13a1.2   | 1.59E-62 | -1.7769338 | 0.02  | 0.307 | 2.61E-58 | 2 |
| Nr4a1     | 3.48E-62 | 0.51823034 | 0.785 | 0.476 | 5.73E-58 | 2 |
| Gadd45b.2 | 5.06E-62 | 0.49213518 | 0.517 | 0.223 | 8.32E-58 | 2 |
| Rps4x.2   | 2.38E-61 | 0.30436456 | 0.999 | 0.959 | 3.91E-57 | 2 |
| Selenop.2 | 1.28E-60 | -2.3158466 | 0.183 | 0.441 | 2.11E-56 | 2 |
| mt-Atp8.1 | 1.25E-59 | -0.454379  | 0.897 | 0.933 | 2.06E-55 | 2 |
| Actb.1    | 2.85E-58 | 0.28391529 | 0.999 | 0.993 | 4.69E-54 | 2 |
| mt-Co3    | 3.97E-58 | -0.3527814 | 0.977 | 0.975 | 6.53E-54 | 2 |
| Efh2.1    | 3.64E-57 | 0.56084711 | 0.55  | 0.269 | 5.99E-53 | 2 |
| Ifitm6    | 3.76E-57 | 0.53057228 | 0.316 | 0.106 | 6.19E-53 | 2 |
| Nr4a2     | 6.51E-57 | 0.52018464 | 0.431 | 0.177 | 1.07E-52 | 2 |
| Fgfr1     | 2.87E-56 | 0.53232641 | 0.281 | 0.09  | 4.73E-52 | 2 |
| Pid1.1    | 1.15E-55 | 0.52415677 | 0.333 | 0.119 | 1.89E-51 | 2 |
| Myo1g     | 2.93E-55 | 0.55481368 | 0.355 | 0.136 | 4.82E-51 | 2 |

|           |          |            |       |       |          |    |
|-----------|----------|------------|-------|-------|----------|----|
| Cbr2.2    | 4.33E-55 | -1.6637471 | 0.009 | 0.267 | 7.12E-51 | 2  |
| H2afz.2   | 5.08E-54 | 0.40853151 | 0.834 | 0.562 | 8.36E-50 | 2  |
| Folr2.2   | 2.28E-53 | -1.7622768 | 0.003 | 0.252 | 3.75E-49 | 2  |
| Pde4b.2   | 6.71E-53 | 0.4818059  | 0.69  | 0.389 | 1.10E-48 | 2  |
| Cd81.2    | 7.13E-53 | -1.1571034 | 0.049 | 0.311 | 1.17E-48 | 2  |
| Fau.2     | 2.61E-52 | 0.25512371 | 0.996 | 0.991 | 4.29E-48 | 2  |
| Mafb.2    | 2.75E-52 | -1.6694791 | 0.033 | 0.288 | 4.52E-48 | 2  |
| Tmsb10.1  | 3.43E-51 | 0.32176531 | 0.995 | 0.764 | 5.64E-47 | 2  |
| Ifitm2.2  | 1.08E-50 | 0.37452371 | 0.692 | 0.359 | 1.78E-46 | 2  |
| Nfkbid.2  | 2.54E-50 | 0.44273634 | 0.483 | 0.218 | 4.18E-46 | 2  |
| mt-Co1    | 1.61E-48 | -0.2780324 | 0.993 | 0.988 | 2.64E-44 | 2  |
| Pmaip1    | 1.77E-48 | 0.53272019 | 0.252 | 0.084 | 2.91E-44 | 2  |
| Cd79a.2   | 6.97E-48 | -1.9351283 | 0.036 | 0.274 | 1.15E-43 | 2  |
| Klf2.1    | 2.58E-47 | -0.9914693 | 0.43  | 0.612 | 4.25E-43 | 2  |
| Rassf4.2  | 3.26E-47 | 0.51324726 | 0.467 | 0.223 | 5.36E-43 | 2  |
| Maf.2     | 6.70E-47 | -1.341127  | 0.023 | 0.253 | 1.10E-42 | 2  |
| Ramp1     | 8.73E-47 | 0.36629461 | 0.305 | 0.112 | 1.44E-42 | 2  |
| Mt2       | 3.02E-46 | 0.69653774 | 0.281 | 0.103 | 4.96E-42 | 2  |
| Tep1      | 5.23E-46 | 0.49187521 | 0.275 | 0.099 | 8.60E-42 | 2  |
| Srgn.1    | 4.18E-45 | 0.39208105 | 0.866 | 0.652 | 6.88E-41 | 2  |
| Ubb.1     | 6.47E-45 | -0.4398136 | 0.833 | 0.879 | 1.06E-40 | 2  |
| Rps27a.1  | 1.21E-44 | 0.27921568 | 0.983 | 0.931 | 1.99E-40 | 2  |
| Myadm     | 1.54E-44 | 0.47983042 | 0.269 | 0.098 | 2.54E-40 | 2  |
| Csf1r.2   | 1.88E-44 | -1.4243443 | 0.131 | 0.354 | 3.10E-40 | 2  |
| Dennd4a.2 | 5.79E-44 | 0.49395918 | 0.455 | 0.221 | 9.53E-40 | 2  |
| Nr4a3     | 9.94E-44 | 0.50588465 | 0.255 | 0.09  | 1.63E-39 | 2  |
| Ms4a6c.2  | 2.23E-43 | 0.44422488 | 0.444 | 0.206 | 3.67E-39 | 2  |
| Ccnd2     | 4.16E-43 | 0.49489167 | 0.403 | 0.184 | 6.84E-39 | 2  |
| Tyropb.2  | 4.88E-43 | 0.28364195 | 0.944 | 0.572 | 8.03E-39 | 2  |
| H2-Ab1.13 | 7.91E-14 | 0.92701768 | 0.971 | 0.708 | 1.30E-09 | 18 |
| Tnfaip3.1 | 1.43E-42 | 0.43780616 | 0.566 | 0.303 | 2.35E-38 | 2  |
| Gm10076.1 | 1.58E-42 | 0.27576182 | 0.981 | 0.95  | 2.59E-38 | 2  |
| S100a10.2 | 1.48E-41 | 0.39787168 | 0.711 | 0.433 | 2.43E-37 | 2  |
| Ahnak.2   | 3.66E-41 | 0.44300972 | 0.792 | 0.521 | 6.02E-37 | 2  |
| Nrros.2   | 4.84E-41 | 0.44929511 | 0.509 | 0.26  | 7.96E-37 | 2  |
| Tkt       | 9.92E-41 | 0.44027652 | 0.412 | 0.195 | 1.63E-36 | 2  |
| mt-Nd4l.1 | 3.27E-40 | -0.387396  | 0.879 | 0.904 | 5.38E-36 | 2  |
| Ywhah.1   | 6.56E-40 | 0.44791187 | 0.471 | 0.241 | 1.08E-35 | 2  |
| Rps27l.1  | 1.04E-39 | 0.48894518 | 0.523 | 0.285 | 1.71E-35 | 2  |
| Serinc3.2 | 1.11E-39 | -0.9909543 | 0.16  | 0.378 | 1.83E-35 | 2  |
| Sh3bgrl3  | 1.15E-39 | 0.34459964 | 0.898 | 0.732 | 1.89E-35 | 2  |
| Mpeg1     | 2.84E-39 | 0.47881872 | 0.393 | 0.183 | 4.68E-35 | 2  |
| Ctsd.2    | 3.58E-39 | -1.0622778 | 0.094 | 0.311 | 5.89E-35 | 2  |



|            |           |            |       |       |           |   |
|------------|-----------|------------|-------|-------|-----------|---|
| Sec61b.2   | 5.90E-39  | 0.408972   | 0.721 | 0.457 | 9.71E-35  | 2 |
| Cxcl2.2    | 8.85E-39  | -2.0006869 | 0.062 | 0.27  | 1.46E-34  | 2 |
| Wdfy4      | 1.16E-38  | 0.41717436 | 0.298 | 0.121 | 1.91E-34  | 2 |
| Gstm1.2    | 1.22E-38  | -0.69415   | 0.495 | 0.662 | 2.01E-34  | 2 |
| Nfkb1      | 3.16E-38  | 0.44935618 | 0.345 | 0.152 | 5.19E-34  | 2 |
| Clec10a.2  | 5.34E-38  | 0.32166296 | 0.462 | 0.223 | 8.78E-34  | 2 |
| Cebpb.2    | 1.31E-37  | -0.9991008 | 0.131 | 0.35  | 2.16E-33  | 2 |
| Ninj1.2    | 1.34E-37  | -1.1355231 | 0.058 | 0.262 | 2.20E-33  | 2 |
| Dusp2      | 1.37E-37  | 0.49262566 | 0.31  | 0.131 | 2.26E-33  | 2 |
| Ppp1r15a.2 | 6.97E-37  | 0.45031658 | 0.574 | 0.334 | 1.15E-32  | 2 |
| Flna.1     | 8.59E-37  | 0.40231312 | 0.513 | 0.275 | 1.41E-32  | 2 |
| Itgb7      | 1.42E-36  | 0.36182373 | 0.37  | 0.168 | 2.34E-32  | 2 |
| Cd52.2     | 2.40E-36  | 0.26013635 | 0.948 | 0.712 | 3.94E-32  | 2 |
| Arpc1b.1   | 2.83E-36  | 0.34674434 | 0.834 | 0.601 | 4.65E-32  | 2 |
| H2-DMb1.1  | 2.48E-151 | 0.91741003 | 0.748 | 0.284 | 4.08E-147 | 2 |
| Ctsb.2     | 6.23E-36  | -1.3420068 | 0.351 | 0.489 | 1.02E-31  | 2 |
| B2m        | 2.10E-35  | -0.4519547 | 0.755 | 0.813 | 3.46E-31  | 2 |
| Erp29.1    | 3.40E-35  | 0.39971257 | 0.593 | 0.343 | 5.59E-31  | 2 |
| Ubl3       | 5.38E-35  | 0.45040739 | 0.403 | 0.202 | 8.85E-31  | 2 |
| Cd44       | 6.47E-35  | 0.42565593 | 0.365 | 0.174 | 1.06E-30  | 2 |
| Serf2.1    | 6.73E-35  | 0.31020633 | 0.928 | 0.744 | 1.11E-30  | 2 |
| Rpl39.1    | 3.40E-34  | 0.26226862 | 0.964 | 0.882 | 5.59E-30  | 2 |
| Pitpna.1   | 4.86E-34  | 0.40962416 | 0.427 | 0.218 | 7.99E-30  | 2 |
| Rasgef1b   | 1.07E-33  | 0.39075713 | 0.272 | 0.112 | 1.76E-29  | 2 |
| Kdm6b.2    | 2.85E-33  | 0.43723393 | 0.505 | 0.292 | 4.68E-29  | 2 |
| Myl6.1     | 3.74E-33  | 0.32248375 | 0.847 | 0.632 | 6.15E-29  | 2 |
| Rps28.1    | 3.90E-33  | 0.29960166 | 0.923 | 0.785 | 6.42E-29  | 2 |
| Lgmn.2     | 3.92E-33  | -1.0530832 | 0.105 | 0.297 | 6.46E-29  | 2 |
| Ctss.1     | 4.38E-33  | 0.30100021 | 0.747 | 0.475 | 7.20E-29  | 2 |
| Ly6d.2     | 6.88E-33  | -1.2505885 | 0.134 | 0.326 | 1.13E-28  | 2 |
| Txnip.1    | 7.29E-33  | -0.9810012 | 0.072 | 0.26  | 1.20E-28  | 2 |
| S100a11.2  | 1.04E-32  | 0.35490553 | 0.618 | 0.375 | 1.70E-28  | 2 |
| Nfam1      | 1.05E-32  | 0.4080901  | 0.286 | 0.125 | 1.73E-28  | 2 |
| Cd37.2     | 1.20E-32  | -0.9887256 | 0.159 | 0.348 | 1.97E-28  | 2 |
| Mt1.2      | 1.84E-32  | 0.3370185  | 0.638 | 0.392 | 3.02E-28  | 2 |
| Rpl35a.1   | 7.84E-32  | 0.30681591 | 0.885 | 0.693 | 1.29E-27  | 2 |
| Ighm.1     | 1.01E-31  | -1.5237666 | 0.257 | 0.431 | 1.67E-27  | 2 |
| Fosl2      | 2.26E-31  | 0.42210379 | 0.387 | 0.197 | 3.72E-27  | 2 |
| Tmem176a.2 | 6.82E-31  | 0.25209156 | 0.558 | 0.31  | 1.12E-26  | 2 |
| Csf2ra     | 8.16E-31  | 0.42616888 | 0.286 | 0.13  | 1.34E-26  | 2 |
| Smdt1.1    | 1.57E-30  | 0.36695613 | 0.564 | 0.33  | 2.59E-26  | 2 |
| Uqcc2      | 2.57E-30  | 0.41788583 | 0.324 | 0.155 | 4.23E-26  | 2 |
| Cytip.2    | 2.91E-30  | 0.27381183 | 0.549 | 0.304 | 4.79E-26  | 2 |

|            |          |            |       |       |          |   |
|------------|----------|------------|-------|-------|----------|---|
| Rack1.1    | 3.28E-30 | 0.27742098 | 0.905 | 0.754 | 5.40E-26 | 2 |
| Socs3.2    | 2.61E-29 | 0.34887282 | 0.469 | 0.259 | 4.30E-25 | 2 |
| Ssr4.1     | 2.89E-29 | 0.38744829 | 0.565 | 0.349 | 4.75E-25 | 2 |
| Trib1.2    | 4.58E-29 | 0.41234833 | 0.397 | 0.209 | 7.54E-25 | 2 |
| Ndufa6     | 8.03E-29 | 0.40536746 | 0.605 | 0.389 | 1.32E-24 | 2 |
| Twf2       | 8.56E-29 | 0.38541242 | 0.261 | 0.115 | 1.41E-24 | 2 |
| Irf5       | 1.09E-28 | 0.40763247 | 0.312 | 0.152 | 1.79E-24 | 2 |
| Ptprcap.2  | 1.77E-28 | -0.9622536 | 0.109 | 0.282 | 2.91E-24 | 2 |
| Ccl9.2     | 2.72E-28 | 0.29589439 | 0.415 | 0.214 | 4.47E-24 | 2 |
| Dock10     | 2.90E-28 | 0.35303746 | 0.363 | 0.186 | 4.77E-24 | 2 |
| Mcl1.2     | 3.22E-28 | 0.26963835 | 0.658 | 0.403 | 5.30E-24 | 2 |
| Rel.2      | 6.46E-28 | 0.35080688 | 0.463 | 0.261 | 1.06E-23 | 2 |
| Arpc2.1    | 1.78E-27 | 0.31002783 | 0.836 | 0.648 | 2.93E-23 | 2 |
| Ikbkb      | 6.46E-27 | 0.36900898 | 0.271 | 0.124 | 1.06E-22 | 2 |
| Prcp       | 8.40E-27 | 0.33924152 | 0.342 | 0.172 | 1.38E-22 | 2 |
| Ctsh.1     | 4.10E-26 | 0.29458087 | 0.59  | 0.364 | 6.75E-22 | 2 |
| Elmsan1    | 9.54E-26 | 0.33391532 | 0.28  | 0.132 | 1.57E-21 | 2 |
| Pip4k2a    | 1.64E-25 | 0.38145926 | 0.275 | 0.131 | 2.70E-21 | 2 |
| Cd9        | 3.74E-25 | 0.34153604 | 0.252 | 0.116 | 6.16E-21 | 2 |
| Eps8.1     | 8.80E-25 | 0.29150489 | 0.284 | 0.135 | 1.45E-20 | 2 |
| Snx20      | 1.73E-24 | 0.33169152 | 0.302 | 0.152 | 2.84E-20 | 2 |
| Rala       | 2.44E-24 | 0.3760109  | 0.325 | 0.168 | 4.01E-20 | 2 |
| Bcl2a1b    | 2.62E-24 | 0.41608643 | 0.345 | 0.184 | 4.32E-20 | 2 |
| Spi1.2     | 3.07E-24 | 0.27815829 | 0.488 | 0.286 | 5.05E-20 | 2 |
| Rbpj.1     | 4.60E-24 | 0.34364685 | 0.316 | 0.161 | 7.57E-20 | 2 |
| Ptpre      | 9.83E-24 | 0.36089987 | 0.271 | 0.132 | 1.62E-19 | 2 |
| Tagln2.1   | 4.34E-23 | 0.32756218 | 0.679 | 0.47  | 7.13E-19 | 2 |
| Lamp1.2    | 6.33E-23 | -0.714111  | 0.289 | 0.427 | 1.04E-18 | 2 |
| H13        | 1.13E-22 | 0.305731   | 0.321 | 0.168 | 1.86E-18 | 2 |
| Rpl23a.1   | 1.85E-22 | 0.26062387 | 0.82  | 0.618 | 3.04E-18 | 2 |
| Sh3bgrl    | 2.18E-22 | 0.32045853 | 0.322 | 0.172 | 3.59E-18 | 2 |
| Marcks.2   | 2.80E-22 | 0.25574244 | 0.516 | 0.313 | 4.61E-18 | 2 |
| Dusp5.1    | 5.74E-22 | 0.2541357  | 0.383 | 0.214 | 9.45E-18 | 2 |
| Stx7       | 2.51E-21 | 0.308715   | 0.28  | 0.143 | 4.12E-17 | 2 |
| AW112010.2 | 3.03E-21 | -1.1310512 | 0.131 | 0.275 | 4.98E-17 | 2 |
| Plec       | 4.02E-21 | 0.30700416 | 0.3   | 0.156 | 6.61E-17 | 2 |
| Cotl1      | 5.37E-21 | 0.30348791 | 0.532 | 0.344 | 8.84E-17 | 2 |
| Fnbp1      | 5.56E-21 | 0.30327007 | 0.373 | 0.211 | 9.15E-17 | 2 |
| Fmnl1      | 5.99E-21 | 0.27463283 | 0.361 | 0.199 | 9.86E-17 | 2 |
| Iqgap1     | 9.01E-21 | 0.29005832 | 0.621 | 0.422 | 1.48E-16 | 2 |
| Plek.2     | 1.63E-20 | 0.27415219 | 0.519 | 0.328 | 2.68E-16 | 2 |
| Sub1.1     | 2.10E-20 | 0.26317383 | 0.647 | 0.444 | 3.46E-16 | 2 |
| Ccnd3      | 2.56E-20 | 0.27176361 | 0.285 | 0.148 | 4.21E-16 | 2 |

|           |          |            |       |       |            |   |
|-----------|----------|------------|-------|-------|------------|---|
| Eif3k.1   | 4.65E-20 | 0.28453385 | 0.618 | 0.424 | 7.66E-16   | 2 |
| Ii10ra    | 1.05E-19 | 0.27046942 | 0.314 | 0.17  | 1.72E-15   | 2 |
| mt-Nd1    | 1.29E-19 | -0.2779691 | 0.862 | 0.869 | 2.11E-15   | 2 |
| Plp2      | 1.47E-19 | 0.30806918 | 0.273 | 0.143 | 2.41E-15   | 2 |
| 9-Sep     | 3.66E-19 | 0.27417757 | 0.277 | 0.146 | 6.03E-15   | 2 |
| Sdf2l1    | 5.37E-19 | 0.34274196 | 0.281 | 0.152 | 8.83E-15   | 2 |
| Arf5.1    | 1.48E-18 | 0.26870923 | 0.584 | 0.394 | 2.44E-14   | 2 |
| Taok3     | 2.47E-18 | 0.31028674 | 0.329 | 0.189 | 4.07E-14   | 2 |
| Fbl       | 2.60E-18 | 0.27630078 | 0.301 | 0.166 | 4.28E-14   | 2 |
| mt-Atp6   | 6.04E-18 | -0.3188898 | 0.794 | 0.797 | 9.94E-14   | 2 |
| Ptpn18.1  | 7.87E-18 | -0.4314713 | 0.569 | 0.618 | 1.29E-13   | 2 |
| mt-Nd2    | 3.20E-17 | -0.3200372 | 0.786 | 0.799 | 5.26E-13   | 2 |
| mt-Nd5.1  | 3.73E-17 | -0.4046202 | 0.635 | 0.662 | 6.14E-13   | 2 |
| Plekho2.1 | 6.17E-17 | 0.26658152 | 0.305 | 0.173 | 1.01E-12   | 2 |
| Fyb.2     | 1.72E-16 | -0.6448066 | 0.139 | 0.262 | 2.83E-12   | 2 |
| Picalm.1  | 1.05E-15 | 0.27060035 | 0.272 | 0.154 | 1.72E-11   | 2 |
| Lbh       | 1.72E-15 | 0.27910025 | 0.288 | 0.165 | 2.83E-11   | 2 |
| Higd2a    | 2.93E-15 | 0.26459079 | 0.306 | 0.18  | 4.82E-11   | 2 |
| Pdia6     | 7.11E-15 | 0.25437147 | 0.318 | 0.192 | 1.17E-10   | 2 |
| Grn.2     | 1.29E-14 | -0.7689149 | 0.298 | 0.385 | 2.11E-10   | 2 |
| Ccl2.2    | 1.33E-14 | -1.0910636 | 0.183 | 0.291 | 2.19E-10   | 2 |
| Ctsc.2    | 5.92E-14 | -0.7232003 | 0.346 | 0.422 | 9.74E-10   | 2 |
| Cltc.2    | 2.68E-13 | -0.595469  | 0.244 | 0.341 | 4.42E-09   | 2 |
| Shisa5.2  | 7.46E-13 | -0.5634853 | 0.386 | 0.458 | 1.23E-08   | 2 |
| Calm2.2   | 3.92E-12 | -0.4977395 | 0.308 | 0.395 | 6.45E-08   | 2 |
| Klf6.2    | 4.47E-12 | -0.6209603 | 0.488 | 0.535 | 7.35E-08   | 2 |
| Rgs10.2   | 9.98E-12 | -0.5259584 | 0.187 | 0.285 | 1.64E-07   | 2 |
| Pnrc1     | 1.34E-11 | -0.4101755 | 0.452 | 0.523 | 2.21E-07   | 2 |
| mt-Nd4.1  | 1.54E-11 | -0.3045064 | 0.71  | 0.702 | 2.54E-07   | 2 |
| Vps37b.2  | 4.81E-11 | -0.706796  | 0.163 | 0.252 | 7.92E-07   | 2 |
| Sat1.2    | 4.92E-11 | -0.5166921 | 0.257 | 0.348 | 8.09E-07   | 2 |
| Gstp1.1   | 6.80E-11 | -0.5054416 | 0.215 | 0.306 | 1.12E-06   | 2 |
| Jak1      | 9.93E-11 | -0.4944171 | 0.241 | 0.328 | 1.63E-06   | 2 |
| Jun.2     | 2.37E-10 | -1.1223762 | 0.456 | 0.463 | 3.91E-06   | 2 |
| Malat1.1  | 8.20E-10 | -0.2666837 | 0.947 | 0.935 | 1.35E-05   | 2 |
| Ubc.2     | 1.42E-09 | -0.4055913 | 0.507 | 0.544 | 2.34E-05   | 2 |
| H2-Q7.3   | 2.95E-95 | 0.9056003  | 0.566 | 0.225 | 4.86E-91   | 4 |
| Ddx5.1    | 1.08E-08 | -0.2630828 | 0.699 | 0.703 | 0.00017771 | 2 |
| Ypel3.1   | 1.55E-08 | -0.456378  | 0.239 | 0.312 | 0.00025541 | 2 |
| Lyz2.2    | 1.90E-08 | -1.3794983 | 0.711 | 0.538 | 0.00031234 | 2 |
| Cstb.2    | 4.03E-08 | -0.4906036 | 0.191 | 0.264 | 0.00066236 | 2 |
| Mrc1.2    | 1.47E-07 | -0.7398007 | 0.261 | 0.31  | 0.00242156 | 2 |
| Neat1.2   | 2.29E-07 | -0.4785666 | 0.268 | 0.333 | 0.00376015 | 2 |

|            |            |            |       |       |            |   |
|------------|------------|------------|-------|-------|------------|---|
| Clta.2     | 6.32E-07   | -0.3633749 | 0.546 | 0.549 | 0.01038861 | 2 |
| Snx5.2     | 8.41E-07   | -0.3870459 | 0.26  | 0.323 | 0.01383827 | 2 |
| Pltp.2     | 1.60E-06   | -0.6463263 | 0.302 | 0.34  | 0.02625208 | 2 |
| Atp2b1.2   | 2.99E-06   | -0.3253077 | 0.29  | 0.353 | 0.04923071 | 2 |
| Hmgb2.1    | 5.96E-06   | -0.4741124 | 0.199 | 0.255 | 0.09810788 | 2 |
| Sqstm1.1   | 1.34E-05   | -0.3711426 | 0.345 | 0.386 | 0.221035   | 2 |
| Ftl1.2     | 0.00011815 | -0.5610168 | 0.975 | 0.882 | 1          | 2 |
| Laptm4a.1  | 0.00019933 | -0.3237041 | 0.232 | 0.276 | 1          | 2 |
| Arl6ip1    | 0.00033401 | -0.3589144 | 0.316 | 0.343 | 1          | 2 |
| Map1lc3b   | 0.00033652 | -0.3298476 | 0.21  | 0.251 | 1          | 2 |
| Rac2.2     | 0.00042161 | -0.3481795 | 0.493 | 0.48  | 1          | 2 |
| Klf4.2     | 0.00113704 | -0.7346918 | 0.386 | 0.374 | 1          | 2 |
| AY036118   | 0.00153247 | -0.2506038 | 0.793 | 0.783 | 1          | 2 |
| Atp6v0c.2  | 0.00208961 | -0.3018453 | 0.418 | 0.424 | 1          | 2 |
| Cdk2ap2.1  | 0.00217189 | -0.2983527 | 0.233 | 0.269 | 1          | 2 |
| Rnaset2a.2 | 0.00254963 | -0.3226737 | 0.255 | 0.281 | 1          | 2 |
| Ccl6.2     | 0.00267732 | -0.3756135 | 0.553 | 0.398 | 1          | 2 |
| Ehd4.2     | 0.002985   | -0.3591895 | 0.244 | 0.269 | 1          | 2 |
| Rap1b.1    | 0.00460657 | -0.2820687 | 0.412 | 0.415 | 1          | 2 |
| Anp32a     | 0.00519866 | -0.2589933 | 0.272 | 0.3   | 1          | 2 |
| Cd14.2     | 0.00664247 | -0.5056735 | 0.243 | 0.262 | 1          | 2 |
| Bri3.2     | 0.00698525 | -0.2899363 | 0.366 | 0.372 | 1          | 2 |
| Prdx1.2    | 0.00860663 | -0.2658639 | 0.367 | 0.381 | 1          | 2 |
| Retnla.1   | 0          | 2.39605559 | 0.826 | 0.186 | 0          | 3 |
| Fcna.1     | 0          | 1.94811182 | 0.748 | 0.117 | 0          | 3 |
| Folr2.3    | 0          | 1.91470773 | 0.835 | 0.17  | 0          | 3 |
| Ednrb      | 0          | 1.90873779 | 0.543 | 0.049 | 0          | 3 |
| Cd209f.1   | 0          | 1.76714371 | 0.674 | 0.103 | 0          | 3 |
| F13a1.3    | 0          | 1.67919514 | 0.828 | 0.227 | 0          | 3 |
| Selenop.3  | 0          | 1.49165581 | 0.975 | 0.362 | 0          | 3 |
| Lyve1.1    | 1.30E-302  | 1.69622884 | 0.534 | 0.076 | 2.14E-298  | 3 |
| Pf4.3      | 1.06E-287  | 1.26137754 | 0.912 | 0.248 | 1.74E-283  | 3 |
| C4b.1      | 2.02E-278  | 1.58717023 | 0.54  | 0.086 | 3.32E-274  | 3 |
| Egr1.2     | 1.34E-275  | 1.37708226 | 0.948 | 0.411 | 2.20E-271  | 3 |
| Mafb.3     | 1.07E-268  | 1.76898122 | 0.76  | 0.216 | 1.77E-264  | 3 |
| Clec10a.3  | 1.10E-262  | 1.6214631  | 0.721 | 0.2   | 1.81E-258  | 3 |
| Ccl24.1    | 1.16E-262  | 1.59745618 | 0.58  | 0.108 | 1.90E-258  | 3 |
| Apoe.3     | 1.13E-256  | 1.20694434 | 0.996 | 0.42  | 1.85E-252  | 3 |
| C1qc.3     | 1.58E-250  | 1.12237958 | 0.946 | 0.275 | 2.59E-246  | 3 |
| Cd36.1     | 3.73E-250  | 1.5611801  | 0.576 | 0.118 | 6.13E-246  | 3 |
| Tmsb10.2   | 9.39E-246  | -2.5418869 | 0.195 | 0.842 | 1.54E-241  | 3 |
| Maf.3      | 1.90E-239  | 1.45471066 | 0.687 | 0.187 | 3.13E-235  | 3 |
| Gas6.1     | 6.07E-239  | 1.49636028 | 0.589 | 0.129 | 9.99E-235  | 3 |

|          |           |            |       |       |           |   |
|----------|-----------|------------|-------|-------|-----------|---|
| C1qb.3   | 5.20E-236 | 1.09665438 | 0.946 | 0.295 | 8.55E-232 | 3 |
| Pltp.3   | 1.21E-232 | 1.37753532 | 0.816 | 0.291 | 1.99E-228 | 3 |
| Cd52.3   | 6.62E-222 | -2.1503942 | 0.122 | 0.793 | 1.09E-217 | 3 |
| Ctsb.3   | 1.42E-221 | 1.18749164 | 0.916 | 0.434 | 2.34E-217 | 3 |
| Klf4.3   | 1.04E-216 | 1.57205964 | 0.8   | 0.334 | 1.72E-212 | 3 |
| Fcgrt.2  | 2.60E-216 | 1.52446196 | 0.683 | 0.216 | 4.27E-212 | 3 |
| Mrc1.3   | 4.99E-215 | 1.29411279 | 0.773 | 0.261 | 8.21E-211 | 3 |
| Ltc4s.1  | 1.55E-213 | 1.48535468 | 0.528 | 0.112 | 2.54E-209 | 3 |
| Ftl1.3   | 8.31E-211 | 0.92895961 | 0.997 | 0.88  | 1.37E-206 | 3 |
| Ccl6.3   | 1.96E-210 | 1.29928549 | 0.867 | 0.369 | 3.23E-206 | 3 |
| Timp2.1  | 9.02E-207 | 1.47994968 | 0.605 | 0.164 | 1.48E-202 | 3 |
| Jun.3    | 1.12E-201 | 1.20323247 | 0.886 | 0.422 | 1.84E-197 | 3 |
| C1qa.3   | 2.56E-198 | 0.93272029 | 0.894 | 0.276 | 4.22E-194 | 3 |
| Fth1.2   | 3.31E-193 | 0.79088811 | 0.993 | 0.954 | 5.44E-189 | 3 |
| Cbr2.3   | 6.53E-191 | 1.2466376  | 0.676 | 0.201 | 1.07E-186 | 3 |
| Csf1r.3  | 2.55E-190 | 1.17224787 | 0.787 | 0.289 | 4.19E-186 | 3 |
| Cd209g.1 | 6.07E-189 | 1.34534109 | 0.427 | 0.075 | 9.98E-185 | 3 |
| Fos.2    | 1.40E-181 | 0.98426284 | 0.955 | 0.589 | 2.31E-177 | 3 |
| Igfbp4.1 | 3.28E-179 | 1.27068067 | 0.603 | 0.172 | 5.40E-175 | 3 |
| Rplp0.2  | 6.97E-175 | -1.1209187 | 0.637 | 0.929 | 1.15E-170 | 3 |
| Rpsa.2   | 1.33E-173 | -1.0760228 | 0.737 | 0.954 | 2.18E-169 | 3 |
| Mt1.3    | 1.53E-173 | 1.12093519 | 0.86  | 0.373 | 2.51E-169 | 3 |
| Cfh.1    | 2.41E-171 | 1.34542018 | 0.556 | 0.156 | 3.96E-167 | 3 |
| Rpl13.2  | 3.68E-171 | -0.8308659 | 0.904 | 0.989 | 6.06E-167 | 3 |
| Ctsc.3   | 1.64E-158 | 1.17997634 | 0.779 | 0.38  | 2.70E-154 | 3 |
| Ninj1.3  | 1.00E-157 | 1.28300449 | 0.608 | 0.207 | 1.65E-153 | 3 |
| Fxyd2.1  | 3.94E-154 | 1.36174468 | 0.391 | 0.08  | 6.48E-150 | 3 |
| Cd209d   | 1.60E-152 | 1.33151109 | 0.334 | 0.057 | 2.63E-148 | 3 |
| Dab2.2   | 1.37E-151 | 1.22116914 | 0.585 | 0.189 | 2.25E-147 | 3 |
| Dusp1.2  | 4.47E-149 | 0.95696117 | 0.899 | 0.578 | 7.35E-145 | 3 |
| Jund.2   | 8.45E-149 | 0.99016346 | 0.916 | 0.66  | 1.39E-144 | 3 |
| Mmp9.1   | 3.84E-147 | 1.18145154 | 0.524 | 0.145 | 6.32E-143 | 3 |
| Itm2b.3  | 2.58E-142 | 0.80120733 | 0.952 | 0.772 | 4.24E-138 | 3 |
| Wwp1.1   | 1.10E-141 | 1.22642872 | 0.501 | 0.145 | 1.81E-137 | 3 |
| Zfp36.2  | 1.68E-141 | 0.84036229 | 0.923 | 0.582 | 2.76E-137 | 3 |
| Cd209b   | 6.05E-141 | 1.33101326 | 0.266 | 0.037 | 9.95E-137 | 3 |
| Glul.1   | 7.44E-138 | 1.30949651 | 0.554 | 0.19  | 1.22E-133 | 3 |
| Cd163.1  | 1.24E-130 | 1.25348491 | 0.452 | 0.122 | 2.03E-126 | 3 |
| Rpl8.2   | 1.47E-130 | -0.8612121 | 0.702 | 0.938 | 2.42E-126 | 3 |
| Junb.2   | 2.06E-130 | 0.72647998 | 0.964 | 0.831 | 3.38E-126 | 3 |
| Tgfb.2   | 3.46E-129 | 1.22583934 | 0.559 | 0.205 | 5.69E-125 | 3 |
| Coro1a.2 | 4.85E-129 | -1.3907373 | 0.171 | 0.682 | 7.98E-125 | 3 |
| Rpl19.2  | 9.32E-128 | -0.7422881 | 0.831 | 0.967 | 1.53E-123 | 3 |

|            |           |            |       |       |           |   |
|------------|-----------|------------|-------|-------|-----------|---|
| Grn.3      | 4.58E-127 | 1.04467615 | 0.718 | 0.344 | 7.53E-123 | 3 |
| Lgmn.3     | 1.45E-125 | 1.13723136 | 0.616 | 0.247 | 2.38E-121 | 3 |
| Rps7.2     | 2.77E-124 | -0.7900618 | 0.795 | 0.956 | 4.55E-120 | 3 |
| Marcksl1.2 | 1.60E-122 | 0.89692781 | 0.802 | 0.4   | 2.63E-118 | 3 |
| Hmox1.1    | 2.20E-122 | 1.27970529 | 0.386 | 0.097 | 3.62E-118 | 3 |
| Eef1a1.2   | 1.56E-118 | -0.6204295 | 0.916 | 0.986 | 2.57E-114 | 3 |
| Uba52.2    | 1.70E-118 | -0.6693501 | 0.907 | 0.981 | 2.79E-114 | 3 |
| Serinc3.3  | 3.53E-117 | 1.09603487 | 0.667 | 0.327 | 5.81E-113 | 3 |
| Rpl18.1    | 4.59E-114 | -0.7526983 | 0.722 | 0.942 | 7.55E-110 | 3 |
| Igf1.1     | 6.15E-109 | 1.13875535 | 0.37  | 0.097 | 1.01E-104 | 3 |
| Rpl32.1    | 2.95E-106 | -0.6499939 | 0.836 | 0.96  | 4.86E-102 | 3 |
| Rhob.1     | 9.15E-106 | 1.18068523 | 0.507 | 0.19  | 1.50E-101 | 3 |
| Klf6.3     | 6.25E-103 | 0.99798663 | 0.774 | 0.507 | 1.03E-98  | 3 |
| Rps24.2    | 5.86E-102 | -0.5757473 | 0.962 | 0.99  | 9.63E-98  | 3 |
| Rps5.2     | 1.91E-101 | -0.6254652 | 0.87  | 0.971 | 3.14E-97  | 3 |
| Ier2.2     | 1.97E-100 | 0.97609034 | 0.774 | 0.535 | 3.24E-96  | 3 |
| Atf3.2     | 3.84E-99  | 0.87733699 | 0.783 | 0.48  | 6.32E-95  | 3 |
| Fosb.2     | 1.13E-98  | 0.85999646 | 0.784 | 0.475 | 1.86E-94  | 3 |
| Rps16.2    | 5.33E-98  | -0.5756601 | 0.915 | 0.98  | 8.78E-94  | 3 |
| Lyz2.3     | 9.16E-98  | 0.41040815 | 0.98  | 0.514 | 1.51E-93  | 3 |
| Rpl18a.2   | 7.34E-97  | -0.6333206 | 0.867 | 0.971 | 1.21E-92  | 3 |
| Tns1       | 2.41E-95  | 1.06049382 | 0.263 | 0.056 | 3.96E-91  | 3 |
| Malat1.2   | 3.32E-95  | -0.7670665 | 0.725 | 0.957 | 5.47E-91  | 3 |
| Rps3.2     | 1.55E-93  | -0.6674999 | 0.712 | 0.932 | 2.55E-89  | 3 |
| Ifi27l2a.2 | 1.74E-93  | 1.00714863 | 0.689 | 0.375 | 2.85E-89  | 3 |
| Ccl7.2     | 1.45E-91  | 0.79327013 | 0.537 | 0.198 | 2.38E-87  | 3 |
| Rps15a.2   | 2.11E-90  | -0.6492035 | 0.851 | 0.96  | 3.48E-86  | 3 |
| C5ar1.1    | 1.38E-88  | 1.0011555  | 0.45  | 0.161 | 2.28E-84  | 3 |
| Rps19.2    | 1.75E-88  | -0.6534433 | 0.822 | 0.944 | 2.87E-84  | 3 |
| Cst3.3     | 2.04E-87  | 0.36259014 | 0.967 | 0.658 | 3.36E-83  | 3 |
| Wfdc17.3   | 3.29E-87  | 1.02121659 | 0.614 | 0.302 | 5.40E-83  | 3 |
| Ifitm3.3   | 9.08E-87  | 0.61892138 | 0.828 | 0.459 | 1.49E-82  | 3 |
| Nfkbiz.2   | 1.19E-86  | 0.83749061 | 0.728 | 0.413 | 1.96E-82  | 3 |
| Ctsd.3     | 1.80E-86  | 1.04127185 | 0.559 | 0.265 | 2.96E-82  | 3 |
| Lsp1.3     | 2.89E-85  | -1.5595067 | 0.035 | 0.431 | 4.76E-81  | 3 |
| Rpl14.2    | 1.36E-84  | -0.7778438 | 0.479 | 0.816 | 2.24E-80  | 3 |
| Ptafr.1    | 1.75E-84  | 1.12182608 | 0.373 | 0.126 | 2.88E-80  | 3 |
| Rps10.2    | 4.92E-83  | -0.5440506 | 0.858 | 0.966 | 8.09E-79  | 3 |
| Ier3.2     | 7.27E-83  | 0.80605801 | 0.627 | 0.297 | 1.20E-78  | 3 |
| Rpl29.2    | 2.57E-82  | -0.6730044 | 0.602 | 0.882 | 4.22E-78  | 3 |
| Btg1.2     | 1.67E-81  | -1.0995303 | 0.198 | 0.609 | 2.75E-77  | 3 |
| mt-Co1.1   | 1.74E-81  | 0.37895466 | 0.99  | 0.989 | 2.87E-77  | 3 |
| Stab1.1    | 8.13E-81  | 0.95040786 | 0.382 | 0.125 | 1.34E-76  | 3 |

|            |          |            |       |       |          |   |
|------------|----------|------------|-------|-------|----------|---|
| Srgn.2     | 4.90E-80 | -0.9129052 | 0.315 | 0.707 | 8.06E-76 | 3 |
| Rpl9-ps6.2 | 3.31E-79 | -0.6287042 | 0.722 | 0.924 | 5.45E-75 | 3 |
| Rps3a1.2   | 4.29E-79 | -0.5052525 | 0.889 | 0.971 | 7.06E-75 | 3 |
| Stard8.1   | 9.20E-78 | 0.97474034 | 0.294 | 0.083 | 1.51E-73 | 3 |
| Itsn1.1    | 5.85E-77 | 0.98725074 | 0.279 | 0.075 | 9.63E-73 | 3 |
| Mcl1.3     | 5.14E-76 | 0.84702612 | 0.669 | 0.404 | 8.46E-72 | 3 |
| Cytip.3    | 6.22E-76 | -1.479751  | 0.004 | 0.358 | 1.02E-71 | 3 |
| Pfn1.1     | 2.79E-75 | -0.6765032 | 0.638 | 0.881 | 4.60E-71 | 3 |
| Marcks.3   | 2.17E-73 | 0.9410258  | 0.572 | 0.309 | 3.57E-69 | 3 |
| Rps29      | 3.71E-73 | 0.55399041 | 0.931 | 0.89  | 6.10E-69 | 3 |
| Lifr       | 3.86E-73 | 0.98857947 | 0.269 | 0.074 | 6.35E-69 | 3 |
| Rpl3.2     | 4.63E-73 | -0.6653714 | 0.609 | 0.859 | 7.61E-69 | 3 |
| Rnase4     | 4.67E-73 | 0.97403242 | 0.26  | 0.069 | 7.68E-69 | 3 |
| Hexa.2     | 2.58E-72 | 0.94376504 | 0.53  | 0.269 | 4.24E-68 | 3 |
| Fxyd5.3    | 3.02E-72 | -1.1530666 | 0.124 | 0.498 | 4.96E-68 | 3 |
| Rps2.1     | 3.13E-72 | -0.540244  | 0.842 | 0.953 | 5.14E-68 | 3 |
| Neat1.3    | 4.24E-72 | 0.99725642 | 0.563 | 0.304 | 6.97E-68 | 3 |
| Ccl2.3     | 6.91E-72 | 0.5754845  | 0.577 | 0.252 | 1.14E-67 | 3 |
| Eef2.2     | 1.28E-71 | -0.7464536 | 0.408 | 0.762 | 2.11E-67 | 3 |
| Serpnb6a.1 | 1.97E-71 | 0.96678018 | 0.346 | 0.119 | 3.25E-67 | 3 |
| Ctsl.1     | 5.20E-71 | 0.9653261  | 0.346 | 0.118 | 8.56E-67 | 3 |
| Rpl13a.2   | 3.49E-69 | -0.6964676 | 0.55  | 0.838 | 5.74E-65 | 3 |
| Lamp1.3    | 4.65E-69 | 0.79351169 | 0.641 | 0.392 | 7.65E-65 | 3 |
| S100a11.3  | 1.30E-66 | -1.1693763 | 0.078 | 0.429 | 2.14E-62 | 3 |
| Dhrs3.1    | 4.63E-66 | 1.02013313 | 0.292 | 0.094 | 7.61E-62 | 3 |
| Ccl8.1     | 1.14E-64 | 0.50965519 | 0.389 | 0.139 | 1.87E-60 | 3 |
| Rpl15.1    | 3.21E-64 | -0.5753608 | 0.632 | 0.869 | 5.29E-60 | 3 |
| Fgfr1.1    | 2.25E-63 | 1.03772045 | 0.284 | 0.092 | 3.70E-59 | 3 |
| Ppia.1     | 7.28E-63 | -0.5416466 | 0.713 | 0.905 | 1.20E-58 | 3 |
| Gapdh.1    | 1.06E-62 | -0.7271952 | 0.408 | 0.743 | 1.75E-58 | 3 |
| Nrp1.1     | 3.47E-62 | 0.91543296 | 0.333 | 0.122 | 5.70E-58 | 3 |
| Pmp22.1    | 1.01E-61 | 0.9517704  | 0.265 | 0.08  | 1.66E-57 | 3 |
| Mgl2.3     | 1.07E-61 | 0.84313375 | 0.482 | 0.223 | 1.76E-57 | 3 |
| Rps13.2    | 1.51E-61 | -0.5939869 | 0.603 | 0.853 | 2.49E-57 | 3 |
| Cd63.1     | 2.41E-61 | 0.77361984 | 0.443 | 0.189 | 3.97E-57 | 3 |
| Rpl10a.2   | 2.02E-60 | -0.5483571 | 0.666 | 0.882 | 3.32E-56 | 3 |
| Limd2.2    | 8.01E-60 | -1.1302235 | 0.062 | 0.384 | 1.32E-55 | 3 |
| Rps18.2    | 4.90E-59 | -0.5683868 | 0.685 | 0.888 | 8.06E-55 | 3 |
| Clta.3     | 1.84E-58 | 0.68152332 | 0.706 | 0.533 | 3.02E-54 | 3 |
| Napsa.3    | 3.58E-58 | -1.347071  | 0.003 | 0.289 | 5.89E-54 | 3 |
| Rpl27.1    | 5.44E-58 | -0.5754275 | 0.59  | 0.852 | 8.96E-54 | 3 |
| Il2rg.2    | 5.59E-58 | -1.2560463 | 0.016 | 0.31  | 9.20E-54 | 3 |
| Msn.2      | 1.71E-57 | -0.9359458 | 0.127 | 0.464 | 2.81E-53 | 3 |

|           |           |            |       |       |           |   |
|-----------|-----------|------------|-------|-------|-----------|---|
| Pde4b.3   | 4.05E-57  | -0.9401486 | 0.114 | 0.447 | 6.67E-53  | 3 |
| Aplp2.2   | 7.20E-57  | 0.94119405 | 0.433 | 0.216 | 1.18E-52  | 3 |
| Rps4x.3   | 9.07E-57  | -0.4172967 | 0.884 | 0.971 | 1.49E-52  | 3 |
| Myh9.1    | 1.11E-56  | -0.9177737 | 0.194 | 0.532 | 1.83E-52  | 3 |
| Rpl6.2    | 1.39E-56  | -0.5008686 | 0.737 | 0.912 | 2.29E-52  | 3 |
| Lrp6      | 3.42E-56  | 0.90705543 | 0.255 | 0.08  | 5.62E-52  | 3 |
| Psmb8.1   | 4.59E-56  | -0.8248069 | 0.169 | 0.509 | 7.55E-52  | 3 |
| Rgl1.1    | 9.56E-56  | 0.91516416 | 0.255 | 0.081 | 1.57E-51  | 3 |
| Shisa5.3  | 4.92E-55  | -0.9266039 | 0.149 | 0.48  | 8.09E-51  | 3 |
| Rpl11.2   | 7.37E-55  | -0.4558124 | 0.813 | 0.937 | 1.21E-50  | 3 |
| Ptprcap.3 | 6.64E-54  | -1.3468498 | 0.013 | 0.289 | 1.09E-49  | 3 |
| Blvrb.1   | 1.15E-53  | 0.80676797 | 0.427 | 0.202 | 1.89E-49  | 3 |
| H2-Eb1.1  | 5.40E-203 | 0.89885264 | 0.989 | 0.679 | 8.88E-199 | 2 |
| H2-DMb2.5 | 5.41E-82  | 0.85278274 | 0.644 | 0.221 | 8.89E-78  | 6 |
| Mtss1.1   | 2.43E-53  | 0.95442436 | 0.333 | 0.135 | 4.00E-49  | 3 |
| Kctd12.2  | 1.28E-52  | 0.89803156 | 0.553 | 0.353 | 2.11E-48  | 3 |
| Rac2.3    | 1.29E-52  | -0.8652099 | 0.187 | 0.509 | 2.12E-48  | 3 |
| Myl12b.2  | 1.43E-52  | -0.766522  | 0.197 | 0.537 | 2.35E-48  | 3 |
| Ccl9.3    | 3.19E-52  | 0.84078543 | 0.434 | 0.214 | 5.24E-48  | 3 |
| Rpl26.2   | 8.09E-52  | -0.4485218 | 0.747 | 0.913 | 1.33E-47  | 3 |
| Cd79a.3   | 1.05E-51  | -2.1627227 | 0.012 | 0.274 | 1.72E-47  | 3 |
| Trf.1     | 7.62E-51  | 0.88753924 | 0.385 | 0.18  | 1.25E-46  | 3 |
| Fau.3     | 1.92E-50  | -0.3399463 | 0.973 | 0.993 | 3.15E-46  | 3 |
| Rpl12.2   | 2.17E-50  | -0.6399563 | 0.524 | 0.784 | 3.57E-46  | 3 |
| Rpl4.2    | 2.86E-50  | -0.6303676 | 0.337 | 0.674 | 4.71E-46  | 3 |
| Ap2a2.1   | 3.92E-50  | 0.92275603 | 0.298 | 0.118 | 6.44E-46  | 3 |
| Ifi207.1  | 4.62E-50  | 0.81472239 | 0.333 | 0.136 | 7.59E-46  | 3 |
| Rpl39.2   | 9.87E-50  | -0.4687741 | 0.729 | 0.905 | 1.62E-45  | 3 |
| Ehd4.3    | 2.75E-49  | 0.77371606 | 0.465 | 0.248 | 4.53E-45  | 3 |
| Cnn2.1    | 2.52E-48  | -0.8806942 | 0.084 | 0.373 | 4.15E-44  | 3 |
| Ptprc.1   | 8.25E-48  | -0.8167096 | 0.159 | 0.468 | 1.36E-43  | 3 |
| Rpl28.2   | 1.75E-47  | -0.4274446 | 0.795 | 0.925 | 2.87E-43  | 3 |
| H3f3a.2   | 2.22E-47  | -0.6178522 | 0.475 | 0.764 | 3.65E-43  | 3 |
| Cd74.3    | 4.24E-47  | -0.7495325 | 0.855 | 0.824 | 6.97E-43  | 3 |
| Rps6.2    | 1.93E-46  | -0.5355963 | 0.535 | 0.794 | 3.17E-42  | 3 |
| Sub1.2    | 2.94E-46  | -0.7484533 | 0.184 | 0.49  | 4.83E-42  | 3 |
| Eif3f.2   | 8.98E-46  | -0.6160533 | 0.327 | 0.646 | 1.48E-41  | 3 |
| Eif5a.1   | 9.13E-46  | -0.7325325 | 0.145 | 0.451 | 1.50E-41  | 3 |
| Rps26.2   | 2.78E-44  | -0.3863772 | 0.829 | 0.945 | 4.57E-40  | 3 |
| H2-Aa.2   | 1.33E-205 | 0.84687883 | 0.992 | 0.717 | 2.19E-201 | 2 |
| Rps20.2   | 2.09E-43  | -0.3761187 | 0.952 | 0.974 | 3.44E-39  | 3 |
| Rps11.2   | 4.25E-43  | -0.3413938 | 0.929 | 0.97  | 6.99E-39  | 3 |
| Rps27.2   | 4.40E-43  | -0.4907054 | 0.777 | 0.914 | 7.23E-39  | 3 |



|            |           |            |       |       |           |    |
|------------|-----------|------------|-------|-------|-----------|----|
| Il1b.2     | 8.10E-43  | -1.7455752 | 0.029 | 0.265 | 1.33E-38  | 3  |
| Zeb2.2     | 1.06E-42  | 0.7456863  | 0.476 | 0.278 | 1.75E-38  | 3  |
| Mat2a.2    | 2.17E-42  | 0.83804916 | 0.41  | 0.226 | 3.57E-38  | 3  |
| Hacd4.1    | 4.78E-42  | 0.86444662 | 0.271 | 0.109 | 7.86E-38  | 3  |
| H2-DMa.4   | 2.34E-59  | 0.83511128 | 0.772 | 0.409 | 3.85E-55  | 8  |
| Rpl34.2    | 5.03E-41  | -0.3436433 | 0.867 | 0.954 | 8.28E-37  | 3  |
| Clic1      | 6.06E-41  | -0.6124558 | 0.229 | 0.53  | 9.97E-37  | 3  |
| Ly6d.3     | 5.75E-40  | -1.2510466 | 0.085 | 0.329 | 9.46E-36  | 3  |
| Sh3bgrl3.1 | 7.75E-40  | -0.4802109 | 0.52  | 0.769 | 1.27E-35  | 3  |
| Dennd4a.3  | 7.84E-40  | -0.894194  | 0.033 | 0.264 | 1.29E-35  | 3  |
| Ptma.2     | 9.13E-40  | -0.495361  | 0.544 | 0.806 | 1.50E-35  | 3  |
| C3ar1.1    | 1.20E-39  | 0.7241771  | 0.282 | 0.116 | 1.97E-35  | 3  |
| Ezr.2      | 2.63E-39  | -0.8972563 | 0.03  | 0.256 | 4.33E-35  | 3  |
| Psme1.1    | 2.91E-39  | -0.7044927 | 0.151 | 0.429 | 4.79E-35  | 3  |
| Mt2.1      | 3.37E-39  | 0.81241209 | 0.266 | 0.106 | 5.54E-35  | 3  |
| Fcer1g.2   | 4.81E-39  | 0.4114653  | 0.815 | 0.554 | 7.92E-35  | 3  |
| Bri3.3     | 1.11E-38  | 0.68798373 | 0.527 | 0.357 | 1.82E-34  | 3  |
| Pepd.1     | 4.27E-38  | 0.87120627 | 0.292 | 0.133 | 7.02E-34  | 3  |
| Lamp2.1    | 4.58E-38  | 0.83477073 | 0.324 | 0.158 | 7.53E-34  | 3  |
| Ubc.3      | 8.18E-38  | 0.58222586 | 0.66  | 0.529 | 1.35E-33  | 3  |
| Rpl27a.2   | 8.54E-38  | -0.4000705 | 0.754 | 0.902 | 1.40E-33  | 3  |
| Rplp2.1    | 2.01E-37  | -0.3539082 | 0.81  | 0.93  | 3.31E-33  | 3  |
| H2-K1.9    | 3.37E-22  | 0.82983602 | 0.959 | 0.842 | 5.55E-18  | 15 |
| H2-DMa     | 2.29E-132 | 0.81888248 | 0.82  | 0.384 | 3.76E-128 | 2  |
| Rpl24.1    | 8.30E-37  | -0.4008202 | 0.666 | 0.869 | 1.37E-32  | 3  |
| Vps37b.3   | 8.91E-37  | -1.1016088 | 0.045 | 0.263 | 1.46E-32  | 3  |
| Rbm3.1     | 1.01E-36  | -0.5610286 | 0.288 | 0.578 | 1.67E-32  | 3  |
| Eef1b2.1   | 1.90E-36  | -0.5309943 | 0.42  | 0.694 | 3.12E-32  | 3  |
| Klf2.2     | 4.70E-36  | 0.5653207  | 0.726 | 0.582 | 7.73E-32  | 3  |
| Actb.2     | 5.41E-35  | -0.3019831 | 0.984 | 0.994 | 8.90E-31  | 3  |
| Cebpd.1    | 6.32E-35  | 0.82646854 | 0.275 | 0.122 | 1.04E-30  | 3  |
| S100a6.3   | 6.44E-35  | -0.5290442 | 0.541 | 0.772 | 1.06E-30  | 3  |
| Plbd1.2    | 6.65E-35  | -0.9401427 | 0.046 | 0.259 | 1.09E-30  | 3  |
| Psme2.2    | 1.05E-34  | -0.6467473 | 0.107 | 0.356 | 1.73E-30  | 3  |
| H2-DMb1.16 | 1.96E-09  | 0.76402653 | 0.771 | 0.326 | 3.22E-05  | 18 |
| AW112010.3 | 9.01E-34  | -1.238971  | 0.065 | 0.28  | 1.48E-29  | 3  |
| Rack1.2    | 2.09E-33  | -0.424199  | 0.554 | 0.789 | 3.44E-29  | 3  |
| Cnbp.2     | 1.11E-32  | -0.5706982 | 0.187 | 0.453 | 1.82E-28  | 3  |
| Rpl7a.1    | 3.91E-32  | -0.3900947 | 0.538 | 0.784 | 6.43E-28  | 3  |
| Eno1.1     | 5.74E-32  | -0.5745388 | 0.178 | 0.435 | 9.44E-28  | 3  |
| Btg2.2     | 8.63E-32  | 0.47035871 | 0.755 | 0.663 | 1.42E-27  | 3  |
| mt-Nd4.2   | 1.45E-30  | 0.45999142 | 0.754 | 0.697 | 2.38E-26  | 3  |
| Fcgr3.2    | 2.17E-30  | 0.639187   | 0.378 | 0.212 | 3.57E-26  | 3  |

|            |          |            |       |       |          |   |
|------------|----------|------------|-------|-------|----------|---|
| Atp5d.1    | 3.66E-30 | -0.4668434 | 0.197 | 0.461 | 6.02E-26 | 3 |
| Btf3.1     | 4.13E-30 | -0.4536687 | 0.37  | 0.635 | 6.80E-26 | 3 |
| Rpl36a.2   | 4.20E-30 | -0.4149156 | 0.546 | 0.781 | 6.90E-26 | 3 |
| Rps27a.2   | 5.19E-30 | -0.2986584 | 0.871 | 0.943 | 8.54E-26 | 3 |
| Cyba       | 9.69E-30 | -0.4431007 | 0.499 | 0.738 | 1.59E-25 | 3 |
| Anxa2.3    | 3.13E-29 | -0.7789025 | 0.09  | 0.293 | 5.15E-25 | 3 |
| mt-Nd4l.2  | 3.51E-29 | -0.320425  | 0.731 | 0.918 | 5.78E-25 | 3 |
| Rel.3      | 3.89E-29 | -0.6733316 | 0.088 | 0.299 | 6.39E-25 | 3 |
| Rpl36.2    | 4.07E-29 | -0.3387914 | 0.797 | 0.909 | 6.70E-25 | 3 |
| Lgals3.2   | 4.97E-29 | -0.7312705 | 0.151 | 0.369 | 8.17E-25 | 3 |
| Cltc.3     | 5.67E-29 | 0.61469392 | 0.467 | 0.318 | 9.33E-25 | 3 |
| Flna.2     | 1.44E-28 | -0.6384107 | 0.103 | 0.317 | 2.37E-24 | 3 |
| Tyrobp.3   | 2.05E-28 | 0.2822794  | 0.852 | 0.584 | 3.37E-24 | 3 |
| Cd81.3     | 3.62E-28 | 0.61993802 | 0.428 | 0.272 | 5.95E-24 | 3 |
| Cfp.2      | 8.57E-28 | 0.58758842 | 0.462 | 0.297 | 1.41E-23 | 3 |
| Unc93b1.1  | 1.12E-27 | 0.5525042  | 0.572 | 0.452 | 1.85E-23 | 3 |
| Adgre1.1   | 2.37E-27 | 0.68603341 | 0.289 | 0.148 | 3.91E-23 | 3 |
| Stk17b.2   | 2.41E-27 | -0.5541931 | 0.217 | 0.458 | 3.96E-23 | 3 |
| Adgre5.2   | 4.95E-27 | -0.620385  | 0.067 | 0.258 | 8.14E-23 | 3 |
| Gpx1.3     | 1.04E-26 | 0.30309165 | 0.845 | 0.699 | 1.71E-22 | 3 |
| Arhgdib.2  | 1.47E-26 | -0.4428275 | 0.366 | 0.618 | 2.43E-22 | 3 |
| Ctsh.2     | 1.65E-26 | 0.61592179 | 0.502 | 0.374 | 2.71E-22 | 3 |
| Gm2a.3     | 2.06E-26 | -0.7099735 | 0.107 | 0.303 | 3.39E-22 | 3 |
| Edf1       | 2.10E-26 | -0.5033738 | 0.145 | 0.369 | 3.46E-22 | 3 |
| Eif3k.2    | 4.64E-26 | -0.4470415 | 0.221 | 0.464 | 7.63E-22 | 3 |
| Cd37.3     | 6.94E-26 | -0.7602861 | 0.149 | 0.347 | 1.14E-21 | 3 |
| Psmb1.1    | 8.26E-26 | -0.4435103 | 0.116 | 0.33  | 1.36E-21 | 3 |
| Rpl5.1     | 8.95E-26 | -0.3849236 | 0.501 | 0.738 | 1.47E-21 | 3 |
| Npm1.1     | 1.05E-25 | -0.4230471 | 0.298 | 0.553 | 1.72E-21 | 3 |
| Syngr2.2   | 2.29E-25 | -0.5961984 | 0.078 | 0.264 | 3.76E-21 | 3 |
| Zfp36l2.1  | 2.33E-25 | 0.58172943 | 0.499 | 0.368 | 3.84E-21 | 3 |
| Aldoa.1    | 2.34E-25 | -0.508637  | 0.166 | 0.386 | 3.85E-21 | 3 |
| Rpl22.1    | 2.55E-25 | -0.3292765 | 0.66  | 0.843 | 4.20E-21 | 3 |
| Eps15.1    | 3.89E-25 | 0.67733765 | 0.282 | 0.151 | 6.39E-21 | 3 |
| Arf6.1     | 4.98E-25 | -0.5477586 | 0.075 | 0.262 | 8.20E-21 | 3 |
| BC005537.1 | 6.87E-25 | 0.76475822 | 0.313 | 0.18  | 1.13E-20 | 3 |
| Tcf4       | 9.19E-25 | 0.71255592 | 0.271 | 0.142 | 1.51E-20 | 3 |
| Psmb3.1    | 1.07E-24 | -0.5201895 | 0.094 | 0.287 | 1.75E-20 | 3 |
| Naca.1     | 1.21E-24 | -0.3750921 | 0.431 | 0.68  | 1.99E-20 | 3 |
| Eps8.2     | 1.34E-24 | 0.72868341 | 0.263 | 0.138 | 2.20E-20 | 3 |
| Clic4.3    | 2.49E-24 | -0.6066294 | 0.084 | 0.268 | 4.09E-20 | 3 |
| Zfp36l1.2  | 2.88E-24 | 0.49440552 | 0.619 | 0.519 | 4.74E-20 | 3 |
| Macf1.2    | 2.89E-24 | -0.5850294 | 0.08  | 0.261 | 4.76E-20 | 3 |

|            |          |            |       |       |          |   |
|------------|----------|------------|-------|-------|----------|---|
| Npc2.2     | 4.65E-24 | 0.4757627  | 0.609 | 0.503 | 7.65E-20 | 3 |
| Cebpb.3    | 5.99E-24 | 0.58312126 | 0.466 | 0.316 | 9.86E-20 | 3 |
| H2afz.3    | 6.10E-24 | -0.5938054 | 0.41  | 0.605 | 1.00E-19 | 3 |
| Sem1.1     | 7.03E-24 | 0.48257857 | 0.614 | 0.543 | 1.16E-19 | 3 |
| H2-Ab1.7   | 2.78E-76 | 0.76145816 | 1     | 0.698 | 4.58E-72 | 9 |
| Eif3i.1    | 8.74E-24 | -0.4975162 | 0.094 | 0.283 | 1.44E-19 | 3 |
| Rbpj.2     | 9.93E-24 | 0.76736104 | 0.289 | 0.165 | 1.63E-19 | 3 |
| Rpl35.2    | 9.96E-24 | -0.2759803 | 0.834 | 0.933 | 1.64E-19 | 3 |
| Eif3h.1    | 1.61E-23 | -0.4146279 | 0.198 | 0.43  | 2.64E-19 | 3 |
| Ppp1ca.1   | 1.66E-23 | -0.430366  | 0.175 | 0.396 | 2.72E-19 | 3 |
| Psmb9.1    | 1.69E-23 | -0.5200134 | 0.078 | 0.258 | 2.79E-19 | 3 |
| Dad1.1     | 1.78E-23 | -0.411998  | 0.135 | 0.344 | 2.92E-19 | 3 |
| Snrpe.1    | 3.65E-23 | -0.4130157 | 0.122 | 0.324 | 6.00E-19 | 3 |
| Atp5b.1    | 4.41E-23 | -0.4586756 | 0.164 | 0.379 | 7.25E-19 | 3 |
| Mif.1      | 7.55E-23 | -0.52938   | 0.085 | 0.264 | 1.24E-18 | 3 |
| Rpl10-ps3  | 1.31E-22 | -0.2666054 | 0.783 | 0.904 | 2.16E-18 | 3 |
| Fcrls.1    | 3.08E-22 | 0.61834549 | 0.281 | 0.15  | 5.06E-18 | 3 |
| Snx5.3     | 3.50E-22 | 0.56497293 | 0.43  | 0.306 | 5.75E-18 | 3 |
| Ldha.1     | 3.61E-22 | -0.4537823 | 0.153 | 0.357 | 5.94E-18 | 3 |
| Ifngr1.1   | 6.40E-22 | -0.5293999 | 0.197 | 0.4   | 1.05E-17 | 3 |
| Tpm4.1     | 8.28E-22 | -0.4622449 | 0.085 | 0.259 | 1.36E-17 | 3 |
| Actr3.1    | 1.02E-21 | -0.3816057 | 0.308 | 0.546 | 1.68E-17 | 3 |
| Ywhaz.1    | 1.07E-21 | -0.3630249 | 0.31  | 0.551 | 1.76E-17 | 3 |
| Gnai2.2    | 1.16E-21 | 0.51853135 | 0.601 | 0.521 | 1.90E-17 | 3 |
| Preli1     | 1.35E-21 | -0.3950219 | 0.133 | 0.33  | 2.22E-17 | 3 |
| App.2      | 2.19E-21 | 0.5870541  | 0.391 | 0.262 | 3.60E-17 | 3 |
| Erh        | 2.23E-21 | -0.439611  | 0.096 | 0.273 | 3.67E-17 | 3 |
| Arhgap45.2 | 2.49E-21 | -0.4852138 | 0.14  | 0.332 | 4.10E-17 | 3 |
| Taldo1.1   | 3.19E-21 | -0.497342  | 0.114 | 0.294 | 5.25E-17 | 3 |
| Anxa5.2    | 3.39E-21 | 0.55225792 | 0.45  | 0.332 | 5.57E-17 | 3 |
| Pkm.1      | 5.85E-21 | -0.4435683 | 0.136 | 0.325 | 9.62E-17 | 3 |
| Lcp1       | 6.51E-21 | -0.3814586 | 0.324 | 0.554 | 1.07E-16 | 3 |
| Capg.1     | 8.25E-21 | -0.5944837 | 0.106 | 0.272 | 1.36E-16 | 3 |
| Cxcl2.3    | 1.69E-20 | 0.28209785 | 0.408 | 0.235 | 2.78E-16 | 3 |
| Atp5c1.1   | 1.87E-20 | -0.3692156 | 0.159 | 0.361 | 3.07E-16 | 3 |
| H2afy.3    | 2.29E-20 | -0.4611028 | 0.097 | 0.268 | 3.77E-16 | 3 |
| Rbm39.2    | 3.41E-20 | -0.3636451 | 0.324 | 0.551 | 5.61E-16 | 3 |
| Ptpn6.2    | 3.67E-20 | -0.4832774 | 0.103 | 0.274 | 6.04E-16 | 3 |
| Mrpl52.1   | 3.69E-20 | -0.359475  | 0.14  | 0.335 | 6.07E-16 | 3 |
| Anp32b.1   | 9.87E-20 | -0.3941001 | 0.137 | 0.322 | 1.62E-15 | 3 |
| Hmgb2.2    | 1.24E-19 | -0.5841786 | 0.101 | 0.264 | 2.04E-15 | 3 |
| Tmsb4x.2   | 1.37E-19 | -0.2758113 | 0.991 | 0.993 | 2.25E-15 | 3 |
| Sumo2      | 1.71E-19 | -0.3464704 | 0.216 | 0.43  | 2.81E-15 | 3 |

|            |          |            |       |       |          |    |
|------------|----------|------------|-------|-------|----------|----|
| Ssr4.2     | 4.74E-19 | -0.3871668 | 0.188 | 0.387 | 7.79E-15 | 3  |
| Ahnak.3    | 5.08E-19 | 0.33566479 | 0.654 | 0.536 | 8.36E-15 | 3  |
| Cycs.1     | 5.98E-19 | -0.4094734 | 0.096 | 0.261 | 9.84E-15 | 3  |
| Xist       | 7.21E-19 | -0.3921228 | 0.281 | 0.493 | 1.19E-14 | 3  |
| Snx2.1     | 7.81E-19 | 0.61381688 | 0.324 | 0.208 | 1.28E-14 | 3  |
| mt-Atp8.2  | 8.12E-19 | -0.2579193 | 0.826 | 0.939 | 1.34E-14 | 3  |
| H2-Q7.8    | 1.06E-27 | 0.75828811 | 0.498 | 0.245 | 1.75E-23 | 10 |
| Nme2.1     | 1.01E-18 | -0.3299005 | 0.346 | 0.571 | 1.66E-14 | 3  |
| Hnrnpa1.1  | 1.15E-18 | -0.4020493 | 0.139 | 0.318 | 1.90E-14 | 3  |
| Snrpg.1    | 2.24E-18 | -0.3969897 | 0.119 | 0.287 | 3.69E-14 | 3  |
| Atox1.2    | 4.12E-18 | -0.4317495 | 0.279 | 0.473 | 6.77E-14 | 3  |
| Ran.1      | 4.54E-18 | -0.3698317 | 0.137 | 0.314 | 7.46E-14 | 3  |
| S100a10.3  | 4.77E-18 | -0.4101222 | 0.282 | 0.477 | 7.84E-14 | 3  |
| AY036118.1 | 4.81E-18 | -0.3398121 | 0.609 | 0.801 | 7.91E-14 | 3  |
| Selplg.2   | 5.74E-18 | -0.4426117 | 0.146 | 0.321 | 9.44E-14 | 3  |
| Tnfaip3.2  | 7.36E-18 | -0.475907  | 0.169 | 0.344 | 1.21E-13 | 3  |
| Nsa2       | 9.39E-18 | -0.3015302 | 0.23  | 0.442 | 1.54E-13 | 3  |
| Rpl7.2     | 9.55E-18 | -0.261838  | 0.699 | 0.855 | 1.57E-13 | 3  |
| Asah1.1    | 1.05E-17 | 0.63460335 | 0.258 | 0.152 | 1.72E-13 | 3  |
| Hnrnpf.1   | 1.25E-17 | -0.3214688 | 0.242 | 0.452 | 2.05E-13 | 3  |
| Serbp1.1   | 1.37E-17 | -0.322654  | 0.208 | 0.402 | 2.26E-13 | 3  |
| Pabpc1.1   | 1.42E-17 | -0.2980731 | 0.43  | 0.653 | 2.33E-13 | 3  |
| Arpc4      | 1.42E-17 | -0.3332456 | 0.172 | 0.359 | 2.34E-13 | 3  |
| Hmgb1      | 2.03E-17 | -0.3567504 | 0.24  | 0.437 | 3.33E-13 | 3  |
| Fcgr2b.2   | 2.09E-17 | 0.55035353 | 0.378 | 0.269 | 3.43E-13 | 3  |
| Eif3e.1    | 2.44E-17 | -0.3362316 | 0.114 | 0.28  | 4.01E-13 | 3  |
| Ppp1r18    | 2.44E-17 | -0.3552783 | 0.111 | 0.273 | 4.01E-13 | 3  |
| Atp2b1.3   | 5.98E-17 | 0.52045457 | 0.433 | 0.338 | 9.83E-13 | 3  |
| Hnrnpu     | 7.11E-17 | -0.2936279 | 0.191 | 0.381 | 1.17E-12 | 3  |
| Sri        | 9.37E-17 | -0.3843872 | 0.11  | 0.266 | 1.54E-12 | 3  |
| Tmem176b.2 | 1.00E-16 | 0.31578011 | 0.562 | 0.427 | 1.64E-12 | 3  |
| Arpc3      | 1.71E-16 | -0.3254383 | 0.336 | 0.544 | 2.81E-12 | 3  |
| Atp6v0b.2  | 1.74E-16 | 0.52760291 | 0.441 | 0.352 | 2.86E-12 | 3  |
| Atp5o.1.1  | 1.84E-16 | -0.3275753 | 0.104 | 0.258 | 3.02E-12 | 3  |
| Ncl.1      | 1.90E-16 | -0.3524123 | 0.208 | 0.391 | 3.12E-12 | 3  |
| Zfand5.2   | 2.00E-16 | 0.56553154 | 0.359 | 0.252 | 3.29E-12 | 3  |
| Fam49b.1   | 2.47E-16 | -0.3164347 | 0.145 | 0.315 | 4.06E-12 | 3  |
| Creg1.1    | 2.81E-16 | 0.61340277 | 0.298 | 0.195 | 4.62E-12 | 3  |
| lfitm2.3   | 3.96E-16 | 0.41865691 | 0.501 | 0.38  | 6.52E-12 | 3  |
| Hnrnpa2b1  | 5.53E-16 | -0.2889822 | 0.355 | 0.572 | 9.10E-12 | 3  |
| Rpl21.2    | 6.68E-16 | -0.2941651 | 0.489 | 0.695 | 1.10E-11 | 3  |
| Hspe1.1    | 6.95E-16 | -0.3108253 | 0.142 | 0.311 | 1.14E-11 | 3  |
| Rpl36al.1  | 7.23E-16 | -0.2654658 | 0.412 | 0.63  | 1.19E-11 | 3  |

|           |          |            |       |       |          |   |
|-----------|----------|------------|-------|-------|----------|---|
| Alox5ap.3 | 7.86E-16 | 0.36439476 | 0.505 | 0.387 | 1.29E-11 | 3 |
| Ywhah.2   | 9.35E-16 | -0.2932928 | 0.12  | 0.277 | 1.54E-11 | 3 |
| Sf3b1     | 1.07E-15 | -0.3420223 | 0.156 | 0.323 | 1.77E-11 | 3 |
| Nol7.1    | 1.19E-15 | -0.2738413 | 0.123 | 0.284 | 1.96E-11 | 3 |
| Rgs10.3   | 1.22E-15 | 0.56170205 | 0.365 | 0.267 | 2.01E-11 | 3 |
| Rpl17.1   | 1.96E-15 | -0.2842283 | 0.375 | 0.59  | 3.23E-11 | 3 |
| Myl12a.1  | 2.65E-15 | -0.2907759 | 0.219 | 0.41  | 4.36E-11 | 3 |
| Ndufa13   | 3.18E-15 | -0.2802636 | 0.227 | 0.418 | 5.24E-11 | 3 |
| Atp5a1    | 4.34E-15 | -0.2735772 | 0.205 | 0.389 | 7.13E-11 | 3 |
| Nop10     | 4.70E-15 | -0.3209169 | 0.13  | 0.283 | 7.73E-11 | 3 |
| Atp5h.1   | 5.22E-15 | -0.281379  | 0.307 | 0.516 | 8.59E-11 | 3 |
| Abracl.2  | 9.03E-15 | -0.321338  | 0.123 | 0.274 | 1.49E-10 | 3 |
| Cox5b     | 9.21E-15 | -0.281315  | 0.258 | 0.452 | 1.52E-10 | 3 |
| Tax1bp1.2 | 9.87E-15 | -0.3203852 | 0.133 | 0.288 | 1.62E-10 | 3 |
| Ccn1.2    | 1.30E-14 | 0.57653447 | 0.385 | 0.298 | 2.13E-10 | 3 |
| Snrpf.1   | 1.35E-14 | -0.3032698 | 0.116 | 0.263 | 2.21E-10 | 3 |
| Rrbp1.2   | 1.50E-14 | 0.55379552 | 0.42  | 0.342 | 2.47E-10 | 3 |
| Atf4.1    | 1.92E-14 | 0.58723554 | 0.297 | 0.203 | 3.16E-10 | 3 |
| Rnf130.1  | 2.60E-14 | 0.59421675 | 0.255 | 0.162 | 4.28E-10 | 3 |
| Cotl1.1   | 2.99E-14 | -0.3166147 | 0.205 | 0.377 | 4.93E-10 | 3 |
| Nrros.3   | 3.27E-14 | 0.50807139 | 0.372 | 0.276 | 5.38E-10 | 3 |
| Lsm4.1    | 3.56E-14 | -0.3082975 | 0.11  | 0.251 | 5.86E-10 | 3 |
| Arpc2.2   | 4.57E-14 | -0.2578322 | 0.491 | 0.683 | 7.52E-10 | 3 |
| Sap18     | 6.68E-14 | -0.2922463 | 0.13  | 0.276 | 1.10E-09 | 3 |
| Rpl22l1.1 | 6.73E-14 | -0.2974109 | 0.275 | 0.458 | 1.11E-09 | 3 |
| Itgb2.2   | 1.30E-13 | -0.3770734 | 0.137 | 0.28  | 2.13E-09 | 3 |
| Lyn.1     | 1.42E-13 | -0.3116899 | 0.116 | 0.254 | 2.34E-09 | 3 |
| Gnas.1    | 1.59E-13 | -0.2709262 | 0.291 | 0.491 | 2.61E-09 | 3 |
| Srrm1     | 2.32E-13 | -0.3049689 | 0.117 | 0.254 | 3.82E-09 | 3 |
| Socs3.3   | 3.12E-13 | 0.57423819 | 0.359 | 0.271 | 5.13E-09 | 3 |
| Rpl10     | 3.36E-13 | 0.33260643 | 0.686 | 0.676 | 5.52E-09 | 3 |
| Grcc10    | 6.79E-13 | -0.2925043 | 0.246 | 0.415 | 1.12E-08 | 3 |
| Ddx3x.2   | 7.62E-13 | 0.58467008 | 0.344 | 0.261 | 1.25E-08 | 3 |
| Cd68.2    | 1.13E-12 | 0.46817561 | 0.355 | 0.264 | 1.86E-08 | 3 |
| Atp5e.1   | 1.36E-12 | -0.2721412 | 0.452 | 0.639 | 2.23E-08 | 3 |
| Zcchc6.1  | 1.57E-12 | 0.5187094  | 0.258 | 0.17  | 2.58E-08 | 3 |
| Fis1.1    | 2.04E-12 | -0.2522669 | 0.164 | 0.312 | 3.35E-08 | 3 |
| mt-Nd2.1  | 1.05E-11 | 0.2545481  | 0.787 | 0.799 | 1.72E-07 | 3 |
| Zyx.3     | 1.11E-11 | -0.3011323 | 0.142 | 0.275 | 1.82E-07 | 3 |
| Slc6a6.1  | 2.29E-11 | 0.55253623 | 0.259 | 0.18  | 3.77E-07 | 3 |
| Park7     | 3.83E-11 | -0.2706864 | 0.145 | 0.277 | 6.29E-07 | 3 |
| Sat1.3    | 4.75E-11 | 0.43354564 | 0.411 | 0.332 | 7.82E-07 | 3 |
| Mycbp2    | 4.97E-11 | -0.2582903 | 0.13  | 0.256 | 8.17E-07 | 3 |

|            |            |            |       |       |            |   |
|------------|------------|------------|-------|-------|------------|---|
| Prr13.1    | 8.26E-11   | -0.2754388 | 0.149 | 0.278 | 1.36E-06   | 3 |
| Ctsa.2     | 9.56E-11   | 0.47744355 | 0.353 | 0.278 | 1.57E-06   | 3 |
| Dock2.1    | 1.84E-10   | -0.2632498 | 0.137 | 0.262 | 3.02E-06   | 3 |
| Scamp2.1   | 2.06E-10   | 0.54136727 | 0.276 | 0.203 | 3.39E-06   | 3 |
| Calm2.3    | 2.14E-10   | 0.44262073 | 0.443 | 0.381 | 3.52E-06   | 3 |
| Ralbp1     | 7.97E-10   | 0.50586406 | 0.263 | 0.191 | 1.31E-05   | 3 |
| Tgfbr2.1   | 9.77E-10   | 0.45475662 | 0.295 | 0.219 | 1.61E-05   | 3 |
| Aldh2.1    | 5.44E-09   | 0.44081721 | 0.271 | 0.201 | 8.94E-05   | 3 |
| Akr1a1.2   | 5.87E-09   | 0.44254437 | 0.394 | 0.348 | 9.65E-05   | 3 |
| Tubb5.1    | 1.25E-08   | -0.2818243 | 0.187 | 0.307 | 0.00020635 | 3 |
| Pld4.2     | 2.05E-08   | 0.41075032 | 0.375 | 0.321 | 0.00033685 | 3 |
| Ap2m1      | 2.22E-08   | 0.53069481 | 0.278 | 0.22  | 0.0003644  | 3 |
| Prdx5.1    | 2.23E-08   | -0.2597759 | 0.22  | 0.347 | 0.00036732 | 3 |
| Gng5.2     | 2.30E-08   | 0.33982599 | 0.588 | 0.598 | 0.00037812 | 3 |
| Vim.2      | 4.10E-08   | -0.3665379 | 0.54  | 0.63  | 0.00067445 | 3 |
| Cdk2ap2.2  | 6.29E-08   | -0.2905665 | 0.168 | 0.275 | 0.00103527 | 3 |
| Man2b1.2   | 8.72E-08   | 0.4378201  | 0.343 | 0.295 | 0.00143394 | 3 |
| Snx3.2     | 1.20E-07   | 0.41969982 | 0.386 | 0.347 | 0.0019722  | 3 |
| Rap1b.2    | 5.95E-07   | 0.37333244 | 0.438 | 0.413 | 0.00978276 | 3 |
| Lmna.1     | 6.71E-07   | 0.36082558 | 0.268 | 0.206 | 0.01102935 | 3 |
| Vamp8.2    | 8.30E-07   | 0.39199062 | 0.378 | 0.338 | 0.01365306 | 3 |
| Pitpna.2   | 1.14E-06   | 0.47708579 | 0.282 | 0.234 | 0.01874847 | 3 |
| Emp3.1     | 1.61E-06   | 0.34006795 | 0.454 | 0.432 | 0.02642283 | 3 |
| Txnip.2    | 8.28E-06   | 0.29820417 | 0.295 | 0.237 | 0.13624445 | 3 |
| Bst2.1     | 3.01E-05   | 0.32219381 | 0.263 | 0.214 | 0.49431729 | 3 |
| Gabarap.1  | 9.44E-05   | 0.25709257 | 0.535 | 0.568 | 1          | 3 |
| Sdcbp.2    | 0.0001543  | 0.3822449  | 0.301 | 0.272 | 1          | 3 |
| Ier5.2     | 0.00026174 | 0.34113625 | 0.381 | 0.37  | 1          | 3 |
| Ppp1r15a.3 | 0.00040775 | 0.2906718  | 0.379 | 0.354 | 1          | 3 |
| Fkbp1a.2   | 0.0006949  | 0.35101766 | 0.278 | 0.25  | 1          | 3 |
| Canx.2     | 0.00072763 | 0.38746438 | 0.302 | 0.285 | 1          | 3 |
| Srsf5      | 0.00100305 | 0.31109726 | 0.369 | 0.365 | 1          | 3 |
| Rbms1.2    | 0.00109975 | 0.36401676 | 0.279 | 0.255 | 1          | 3 |
| Atpif1.2   | 0.00300151 | 0.30436065 | 0.326 | 0.314 | 1          | 3 |
| Ptp4a2.1   | 0.00314342 | 0.34615487 | 0.307 | 0.297 | 1          | 3 |
| Kdm6b.3    | 0.00417697 | 0.34316672 | 0.326 | 0.311 | 1          | 3 |
| Tmed10.1   | 0.00450278 | 0.29424154 | 0.3   | 0.284 | 1          | 3 |
| Rtn4.2     | 0.00521389 | 0.34698479 | 0.266 | 0.249 | 1          | 3 |
| Wnk1       | 0.00864987 | 0.33797366 | 0.269 | 0.258 | 1          | 3 |
| Ms4a4b     | 0          | 1.97817317 | 0.67  | 0.06  | 0          | 4 |
| Cd3d       | 0          | 1.72820835 | 0.642 | 0.06  | 0          | 4 |
| Cd8b1      | 0          | 1.70002528 | 0.384 | 0.012 | 0          | 4 |
| Cd3e       | 0          | 1.64098821 | 0.641 | 0.066 | 0          | 4 |

|           |           |            |       |       |           |    |
|-----------|-----------|------------|-------|-------|-----------|----|
| Lat       | 0         | 1.58247594 | 0.557 | 0.063 | 0         | 4  |
| Cd3g      | 0         | 1.54399638 | 0.609 | 0.076 | 0         | 4  |
| Gzmk      | 1.27E-307 | 1.40729734 | 0.267 | 0.008 | 2.09E-303 | 4  |
| Nkg7      | 8.67E-307 | 1.54626402 | 0.603 | 0.088 | 1.43E-302 | 4  |
| Lck       | 1.58E-254 | 1.33837495 | 0.499 | 0.075 | 2.59E-250 | 4  |
| Thy1      | 1.39E-222 | 1.16003831 | 0.512 | 0.089 | 2.28E-218 | 4  |
| Cd27      | 2.10E-222 | 1.21543271 | 0.299 | 0.025 | 3.46E-218 | 4  |
| Ccl5      | 4.34E-207 | 2.04565463 | 0.548 | 0.121 | 7.15E-203 | 4  |
| Vps37b.4  | 1.42E-203 | 1.24074359 | 0.692 | 0.201 | 2.34E-199 | 4  |
| Skap1     | 2.52E-183 | 1.1297846  | 0.416 | 0.07  | 4.15E-179 | 4  |
| Cd247     | 2.11E-174 | 1.06397348 | 0.286 | 0.032 | 3.46E-170 | 4  |
| Cd28      | 3.60E-173 | 1.1668479  | 0.328 | 0.045 | 5.93E-169 | 4  |
| Cd74.4    | 1.39E-169 | -1.6697733 | 0.5   | 0.858 | 2.29E-165 | 4  |
| Tyrobp.4  | 1.77E-168 | -2.4254139 | 0.067 | 0.659 | 2.91E-164 | 4  |
| Cst3.4    | 7.60E-162 | -2.6275294 | 0.255 | 0.726 | 1.25E-157 | 4  |
| H2-Q4.3   | 1.42E-13  | 0.75775881 | 0.515 | 0.214 | 2.34E-09  | 15 |
| Trbc2     | 9.16E-153 | 1.06345071 | 0.328 | 0.051 | 1.51E-148 | 4  |
| Rps15a.3  | 4.35E-152 | 0.63098339 | 0.996 | 0.946 | 7.15E-148 | 4  |
| H2-Q4     | 6.12E-55  | 0.72039265 | 0.441 | 0.196 | 1.01E-50  | 4  |
| Fcer1g.3  | 6.05E-149 | -2.2766152 | 0.081 | 0.624 | 9.95E-145 | 4  |
| Hcst      | 3.72E-147 | 1.09760877 | 0.553 | 0.162 | 6.12E-143 | 4  |
| H2-DMb1.6 | 1.61E-45  | 0.69649199 | 0.662 | 0.312 | 2.66E-41  | 8  |
| Eef1a1.3  | 1.17E-144 | 0.52062267 | 0.993 | 0.979 | 1.92E-140 | 4  |
| Gpx1.4    | 1.53E-143 | -1.6884743 | 0.336 | 0.747 | 2.52E-139 | 4  |
| Rpsa.3    | 7.75E-138 | 0.60481896 | 0.993 | 0.93  | 1.27E-133 | 4  |
| Fth1.3    | 2.16E-135 | -1.047337  | 0.896 | 0.964 | 3.56E-131 | 4  |
| Lyz2.4    | 2.50E-132 | -2.9499282 | 0.098 | 0.598 | 4.11E-128 | 4  |
| Rps16.3   | 9.12E-126 | 0.51890626 | 0.991 | 0.972 | 1.50E-121 | 4  |
| Zfp36.3   | 1.10E-124 | -1.822038  | 0.198 | 0.651 | 1.81E-120 | 4  |
| Ftl1.4    | 4.66E-123 | -1.3869104 | 0.779 | 0.901 | 7.67E-119 | 4  |
| Ifitm3.4  | 1.69E-120 | -2.3402336 | 0.047 | 0.533 | 2.79E-116 | 4  |
| Rpl12.3   | 4.02E-120 | 0.73901416 | 0.918 | 0.747 | 6.61E-116 | 4  |
| Gimap3    | 1.68E-119 | 1.00177232 | 0.475 | 0.134 | 2.76E-115 | 4  |
| Rpl19.3   | 2.56E-117 | 0.50293297 | 0.994 | 0.951 | 4.22E-113 | 4  |
| Tmsb10.3  | 8.04E-117 | 0.62594597 | 0.996 | 0.766 | 1.32E-112 | 4  |
| Psap.2    | 1.87E-116 | -1.5424108 | 0.336 | 0.708 | 3.08E-112 | 4  |
| Rps24.3   | 4.47E-113 | 0.47740236 | 0.999 | 0.987 | 7.35E-109 | 4  |
| Gimap6.1  | 3.60E-112 | 0.94136011 | 0.509 | 0.161 | 5.93E-108 | 4  |
| Itk       | 1.79E-109 | 0.84405965 | 0.257 | 0.043 | 2.94E-105 | 4  |
| Uba52.3   | 8.33E-108 | 0.457179   | 0.991 | 0.973 | 1.37E-103 | 4  |
| Rpl13a.3  | 4.05E-107 | 0.61999291 | 0.94  | 0.801 | 6.66E-103 | 4  |
| Rps7.3    | 1.77E-104 | 0.52535283 | 0.991 | 0.937 | 2.92E-100 | 4  |
| Rpl18a.3  | 3.38E-104 | 0.47646085 | 0.99  | 0.96  | 5.56E-100 | 4  |

|            |           |            |       |       |          |    |
|------------|-----------|------------|-------|-------|----------|----|
| Ctsw       | 8.14E-104 | 0.80698457 | 0.277 | 0.052 | 1.34E-99 | 4  |
| Saraf      | 2.40E-103 | 1.01816941 | 0.456 | 0.147 | 3.95E-99 | 4  |
| Rpl18.2    | 7.43E-100 | 0.53176988 | 0.982 | 0.918 | 1.22E-95 | 4  |
| Ets1.1     | 2.28E-99  | 0.86020937 | 0.484 | 0.156 | 3.76E-95 | 4  |
| Shisa5.4   | 1.01E-98  | 0.84096643 | 0.752 | 0.423 | 1.66E-94 | 4  |
| Gimap4     | 3.02E-98  | 0.88802038 | 0.434 | 0.13  | 4.96E-94 | 4  |
| Fos.3      | 4.15E-97  | -1.7176727 | 0.284 | 0.653 | 6.83E-93 | 4  |
| H2-DMa.5   | 5.99E-55  | 0.69624885 | 0.863 | 0.409 | 9.85E-51 | 9  |
| Rps3.3     | 7.96E-95  | 0.51160432 | 0.966 | 0.908 | 1.31E-90 | 4  |
| H2-Q6.3    | 8.37E-13  | 0.69522782 | 0.29  | 0.153 | 1.38E-08 | 10 |
| AW112010.4 | 2.03E-93  | 0.75330512 | 0.584 | 0.23  | 3.34E-89 | 4  |
| Cd2        | 3.18E-93  | 0.88164951 | 0.364 | 0.098 | 5.24E-89 | 4  |
| Rps10.3    | 3.34E-93  | 0.47399922 | 0.987 | 0.954 | 5.49E-89 | 4  |
| Rpl8.3     | 1.91E-92  | 0.51142658 | 0.974 | 0.911 | 3.14E-88 | 4  |
| Marcksl1.3 | 2.17E-90  | -1.9820096 | 0.066 | 0.47  | 3.57E-86 | 4  |
| Ccl6.4     | 2.40E-90  | -2.0279925 | 0.04  | 0.448 | 3.95E-86 | 4  |
| Tmem176b.3 | 4.02E-90  | -1.6674324 | 0.066 | 0.474 | 6.61E-86 | 4  |
| Apoe.4     | 1.46E-87  | -3.0929941 | 0.132 | 0.503 | 2.40E-83 | 4  |
| 1-Sep      | 3.25E-87  | 0.79138791 | 0.438 | 0.142 | 5.34E-83 | 4  |
| Alox5ap.4  | 6.14E-87  | -1.6628277 | 0.035 | 0.432 | 1.01E-82 | 4  |
| Rplp0.3    | 1.04E-86  | 0.53487562 | 0.981 | 0.896 | 1.71E-82 | 4  |
| Mt1.4      | 1.65E-85  | -2.2660823 | 0.059 | 0.45  | 2.71E-81 | 4  |
| Rpl9-ps6.3 | 8.18E-85  | 0.4706447  | 0.968 | 0.9   | 1.35E-80 | 4  |
| Fosb.3     | 5.26E-84  | -1.5359044 | 0.152 | 0.535 | 8.66E-80 | 4  |
| Rpl13.3    | 2.33E-81  | 0.39802756 | 0.991 | 0.981 | 3.83E-77 | 4  |
| Ifitm2.4   | 6.86E-81  | -1.6932968 | 0.047 | 0.423 | 1.13E-76 | 4  |
| Egr1.3     | 1.14E-80  | -1.9610318 | 0.12  | 0.49  | 1.87E-76 | 4  |
| Rps27.3    | 1.67E-80  | 0.48819516 | 0.966 | 0.896 | 2.74E-76 | 4  |
| Rps5.3     | 2.48E-80  | 0.42740573 | 0.982 | 0.96  | 4.08E-76 | 4  |
| Prkch      | 9.67E-80  | 0.88099616 | 0.261 | 0.061 | 1.59E-75 | 4  |
| Limd2.3    | 3.07E-79  | 0.78588821 | 0.645 | 0.329 | 5.05E-75 | 4  |
| Emb        | 2.07E-77  | 0.87654878 | 0.462 | 0.179 | 3.40E-73 | 4  |
| Grn.4      | 2.21E-77  | -1.6051008 | 0.041 | 0.408 | 3.64E-73 | 4  |
| Unc93b1.2  | 4.15E-77  | -1.2177488 | 0.123 | 0.495 | 6.83E-73 | 4  |
| Ablim1.1   | 7.95E-77  | 0.74153387 | 0.355 | 0.106 | 1.31E-72 | 4  |
| Nfkbiz.3   | 7.87E-76  | -1.6019846 | 0.114 | 0.472 | 1.29E-71 | 4  |
| Rps3a1.3   | 1.79E-75  | 0.39113942 | 0.985 | 0.962 | 2.94E-71 | 4  |
| Csf1r.4    | 4.11E-74  | -1.8774975 | 0.013 | 0.363 | 6.75E-70 | 4  |
| Rpl3.3     | 4.61E-73  | 0.51253018 | 0.934 | 0.828 | 7.58E-69 | 4  |
| Il7r       | 9.28E-73  | 0.75998019 | 0.257 | 0.062 | 1.53E-68 | 4  |
| C1qb.4     | 3.25E-72  | -2.7434848 | 0.041 | 0.382 | 5.34E-68 | 4  |
| Tmsb4x.3   | 2.60E-71  | -0.4803125 | 0.991 | 0.993 | 4.27E-67 | 4  |
| Cd83.2     | 2.88E-70  | -1.2158348 | 0.147 | 0.501 | 4.73E-66 | 4  |



|            |          |            |       |       |          |   |
|------------|----------|------------|-------|-------|----------|---|
| C1qc.4     | 8.96E-70 | -2.6791402 | 0.029 | 0.363 | 1.47E-65 | 4 |
| Selenop.4  | 2.46E-68 | -2.2745807 | 0.117 | 0.444 | 4.05E-64 | 4 |
| Rps18.3    | 3.63E-68 | 0.47797398 | 0.947 | 0.863 | 5.98E-64 | 4 |
| Rpl27.2    | 8.77E-68 | 0.46113127 | 0.931 | 0.82  | 1.44E-63 | 4 |
| Rpl32.2    | 8.81E-68 | 0.40438919 | 0.974 | 0.947 | 1.45E-63 | 4 |
| C1qa.4     | 1.35E-67 | -2.5560659 | 0.032 | 0.358 | 2.23E-63 | 4 |
| Wfdc17.4   | 1.39E-66 | -1.7437043 | 0.032 | 0.358 | 2.29E-62 | 4 |
| Klf4.4     | 2.60E-66 | -1.7154632 | 0.072 | 0.404 | 4.27E-62 | 4 |
| Atf3.3     | 3.27E-66 | -1.4099858 | 0.21  | 0.535 | 5.38E-62 | 4 |
| Pltp.4     | 3.49E-66 | -1.7035218 | 0.037 | 0.365 | 5.75E-62 | 4 |
| Mrc1.4     | 1.53E-65 | -1.7943932 | 0.013 | 0.333 | 2.51E-61 | 4 |
| Ctss.2     | 1.61E-65 | -1.0965671 | 0.202 | 0.529 | 2.65E-61 | 4 |
| Ms4a6b     | 5.26E-65 | 0.82263244 | 0.362 | 0.129 | 8.65E-61 | 4 |
| Kctd12.3   | 9.19E-64 | -1.273062  | 0.072 | 0.399 | 1.51E-59 | 4 |
| Cfp.3      | 1.07E-63 | -1.4100575 | 0.021 | 0.339 | 1.75E-59 | 4 |
| Dusp1.3    | 2.14E-63 | -1.1656698 | 0.353 | 0.63  | 3.52E-59 | 4 |
| Rps2.2     | 3.15E-63 | 0.38854872 | 0.981 | 0.94  | 5.18E-59 | 4 |
| Pf4.4      | 3.85E-63 | -2.4924307 | 0.022 | 0.333 | 6.33E-59 | 4 |
| Marcks.4   | 6.19E-63 | -1.3168846 | 0.04  | 0.36  | 1.02E-58 | 4 |
| Eef2.3     | 7.65E-63 | 0.51799808 | 0.864 | 0.719 | 1.26E-58 | 4 |
| Ltb.2      | 1.19E-62 | 0.64498546 | 0.459 | 0.183 | 1.95E-58 | 4 |
| Ctsh.3     | 1.21E-62 | -1.1697182 | 0.091 | 0.414 | 1.99E-58 | 4 |
| Ctsb.4     | 2.38E-61 | -1.555676  | 0.205 | 0.502 | 3.92E-57 | 4 |
| Rpl30.1    | 2.15E-60 | 0.35453934 | 0.984 | 0.95  | 3.54E-56 | 4 |
| Pld4.3     | 3.55E-59 | -1.1692755 | 0.045 | 0.352 | 5.83E-55 | 4 |
| F13a1.4    | 1.94E-58 | -1.7730226 | 0.012 | 0.305 | 3.19E-54 | 4 |
| Ptprcap.4  | 2.90E-58 | 0.59108095 | 0.532 | 0.24  | 4.77E-54 | 4 |
| Ccl2.4     | 1.11E-57 | -2.1930236 | 0.015 | 0.306 | 1.82E-53 | 4 |
| Ccr7.1     | 1.74E-57 | 0.567721   | 0.4   | 0.149 | 2.87E-53 | 4 |
| Rpl36.3    | 2.60E-57 | 0.39229746 | 0.96  | 0.894 | 4.27E-53 | 4 |
| Jun.4      | 2.94E-57 | -1.7040219 | 0.198 | 0.487 | 4.84E-53 | 4 |
| H2-Q6.2    | 2.39E-23 | 0.66457933 | 0.327 | 0.149 | 3.93E-19 | 7 |
| Ctsc.4     | 3.44E-56 | -1.270167  | 0.141 | 0.441 | 5.66E-52 | 4 |
| Rps23.1    | 5.81E-56 | 0.39791108 | 0.938 | 0.892 | 9.55E-52 | 4 |
| Jund.3     | 9.62E-56 | -0.8854937 | 0.456 | 0.704 | 1.58E-51 | 4 |
| Rplp2.2    | 2.31E-55 | 0.37213127 | 0.974 | 0.914 | 3.80E-51 | 4 |
| Tmem176a.3 | 2.53E-55 | -1.2217818 | 0.06  | 0.359 | 4.17E-51 | 4 |
| Cybb.2     | 3.41E-55 | -1.2263942 | 0.062 | 0.354 | 5.61E-51 | 4 |
| H2-Ob.1    | 6.64E-41 | 0.65128582 | 0.393 | 0.141 | 1.09E-36 | 6 |
| Mcl1.4     | 9.02E-55 | -1.0617635 | 0.148 | 0.453 | 1.48E-50 | 4 |
| Leprotl1   | 1.13E-54 | 0.73128481 | 0.333 | 0.125 | 1.87E-50 | 4 |
| Cd14.3     | 2.33E-54 | -1.5832004 | 0.009 | 0.284 | 3.83E-50 | 4 |
| Rac2.4     | 3.02E-54 | 0.571533   | 0.713 | 0.459 | 4.97E-50 | 4 |

|           |          |            |       |       |          |    |
|-----------|----------|------------|-------|-------|----------|----|
| H2-Q4.2   | 2.73E-14 | 0.6162386  | 0.372 | 0.212 | 4.48E-10 | 10 |
| Rpl23.1   | 7.14E-54 | 0.32156852 | 0.988 | 0.974 | 1.17E-49 | 4  |
| Rps13.3   | 1.59E-53 | 0.39911628 | 0.912 | 0.824 | 2.62E-49 | 4  |
| Spi1.3    | 3.58E-53 | -1.1027349 | 0.045 | 0.33  | 5.90E-49 | 4  |
| Clec10a.4 | 2.60E-52 | -1.5116839 | 0.003 | 0.268 | 4.28E-48 | 4  |
| Rps4x.4   | 9.78E-52 | 0.32153805 | 0.982 | 0.961 | 1.61E-47 | 4  |
| Mafb.4    | 2.91E-51 | -1.6971206 | 0.019 | 0.287 | 4.78E-47 | 4  |
| Rps20.3   | 3.16E-51 | 0.35332602 | 0.977 | 0.972 | 5.20E-47 | 4  |
| Cd68.3    | 1.29E-50 | -1.1609758 | 0.025 | 0.295 | 2.12E-46 | 4  |
| Zeb2.3    | 2.19E-50 | -1.1461915 | 0.045 | 0.319 | 3.59E-46 | 4  |
| Rpl11.3   | 3.22E-50 | 0.35656706 | 0.962 | 0.923 | 5.29E-46 | 4  |
| Ly86.1    | 5.66E-50 | -1.0505577 | 0.066 | 0.342 | 9.31E-46 | 4  |
| Rplp1     | 1.19E-49 | 0.32424653 | 0.982 | 0.973 | 1.96E-45 | 4  |
| Il21r     | 1.79E-49 | 0.68740661 | 0.279 | 0.095 | 2.95E-45 | 4  |
| Lgmn.4    | 2.72E-49 | -1.2989592 | 0.037 | 0.302 | 4.47E-45 | 4  |
| Tgfb.3    | 3.92E-49 | -1.2654381 | 0.004 | 0.258 | 6.45E-45 | 4  |
| Cxcl2.4   | 8.20E-49 | -2.2899895 | 0.016 | 0.273 | 1.35E-44 | 4  |
| Rps19.3   | 1.40E-48 | 0.36425863 | 0.966 | 0.93  | 2.31E-44 | 4  |
| Rpl27a.3  | 1.51E-48 | 0.36897974 | 0.943 | 0.884 | 2.48E-44 | 4  |
| Ctsz.2    | 2.20E-48 | -1.0188346 | 0.103 | 0.376 | 3.62E-44 | 4  |
| Rassf4.3  | 1.64E-47 | -1.0187745 | 0.015 | 0.268 | 2.70E-43 | 4  |
| Rpl6.3    | 1.86E-47 | 0.39089864 | 0.952 | 0.892 | 3.06E-43 | 4  |
| Fcgrt.3   | 2.41E-47 | -1.2766249 | 0.023 | 0.279 | 3.96E-43 | 4  |
| Fcgr2b.3  | 3.86E-47 | -1.0615727 | 0.041 | 0.301 | 6.34E-43 | 4  |
| B4galnt1  | 8.36E-47 | 0.69725623 | 0.34  | 0.138 | 1.38E-42 | 4  |
| Mgl2.4    | 1.12E-46 | -1.3681396 | 0.019 | 0.267 | 1.84E-42 | 4  |
| Plbd1.3   | 5.45E-46 | -1.1916783 | 0.016 | 0.262 | 8.97E-42 | 4  |
| Tpt1      | 7.80E-46 | 0.26941207 | 0.99  | 0.982 | 1.28E-41 | 4  |
| Hexa.3    | 1.62E-45 | -1.0708362 | 0.056 | 0.314 | 2.66E-41 | 4  |
| Ccl9.4    | 3.42E-45 | -1.1764082 | 0.013 | 0.254 | 5.63E-41 | 4  |
| Nfkb.3    | 6.93E-45 | -0.8801914 | 0.292 | 0.542 | 1.14E-40 | 4  |
| Rpl15.2   | 8.66E-45 | 0.37430835 | 0.918 | 0.841 | 1.42E-40 | 4  |
| App.3     | 2.82E-44 | -0.9990291 | 0.041 | 0.296 | 4.64E-40 | 4  |
| Il2rg.3   | 3.44E-44 | 0.56099585 | 0.504 | 0.263 | 5.66E-40 | 4  |
| Bri3.4    | 4.00E-44 | -0.9416645 | 0.129 | 0.395 | 6.58E-40 | 4  |
| Rps21.2   | 9.51E-44 | 0.35543289 | 0.924 | 0.879 | 1.56E-39 | 4  |
| Rps6.3    | 1.77E-43 | 0.40300106 | 0.878 | 0.761 | 2.91E-39 | 4  |
| Rps8.2    | 2.03E-43 | 0.27607065 | 0.99  | 0.982 | 3.34E-39 | 4  |
| Il1b.3    | 2.36E-43 | -1.7749649 | 0.026 | 0.265 | 3.89E-39 | 4  |
| Nrros.4   | 2.63E-43 | -0.9208478 | 0.053 | 0.306 | 4.33E-39 | 4  |
| Rpl10a.3  | 3.57E-43 | 0.37929195 | 0.909 | 0.859 | 5.87E-39 | 4  |
| Rps14.1   | 7.91E-43 | 0.32303924 | 0.952 | 0.928 | 1.30E-38 | 4  |
| Crip1.3   | 1.20E-41 | -0.8985016 | 0.625 | 0.729 | 1.97E-37 | 4  |

|           |          |            |       |       |          |   |
|-----------|----------|------------|-------|-------|----------|---|
| Lgals3.3  | 1.61E-41 | -1.029297  | 0.116 | 0.372 | 2.66E-37 | 4 |
| Ckb.2     | 1.71E-41 | -1.1156126 | 0.026 | 0.255 | 2.81E-37 | 4 |
| Nr4a1.1   | 3.28E-41 | -0.8203147 | 0.276 | 0.527 | 5.39E-37 | 4 |
| Rpl29.3   | 1.82E-40 | 0.35538393 | 0.927 | 0.85  | 2.99E-36 | 4 |
| Chd3      | 2.12E-40 | 0.65204386 | 0.283 | 0.11  | 3.49E-36 | 4 |
| Rpl39.3   | 2.14E-40 | 0.34070564 | 0.938 | 0.885 | 3.52E-36 | 4 |
| Plek.3    | 3.57E-40 | -0.8956862 | 0.117 | 0.368 | 5.87E-36 | 4 |
| Btg1.3    | 4.31E-40 | 0.48179879 | 0.767 | 0.555 | 7.09E-36 | 4 |
| Pim1.2    | 7.70E-40 | -0.7566478 | 0.21  | 0.472 | 1.27E-35 | 4 |
| Clic4.4   | 1.03E-39 | -1.0205789 | 0.044 | 0.271 | 1.69E-35 | 4 |
| Cbr2.4    | 2.18E-39 | -1.4318009 | 0.04  | 0.262 | 3.59E-35 | 4 |
| Serinc3.4 | 3.43E-39 | -0.9292063 | 0.132 | 0.378 | 5.65E-35 | 4 |
| Rack1.3   | 9.31E-39 | 0.38456833 | 0.842 | 0.762 | 1.53E-34 | 4 |
| Cd81.4    | 9.33E-39 | -0.9494449 | 0.072 | 0.306 | 1.53E-34 | 4 |
| Rpl34.3   | 9.88E-39 | 0.27409271 | 0.975 | 0.944 | 1.63E-34 | 4 |
| Anxa5.3   | 1.97E-38 | -0.8563872 | 0.119 | 0.363 | 3.24E-34 | 4 |
| Rpl14.3   | 5.92E-38 | 0.38065433 | 0.861 | 0.78  | 9.74E-34 | 4 |
| Pnrc1.1   | 2.67E-37 | 0.50315399 | 0.695 | 0.499 | 4.40E-33 | 4 |
| Ehd4.4    | 2.78E-37 | -0.9346572 | 0.06  | 0.286 | 4.57E-33 | 4 |
| Ier3.3    | 5.02E-37 | -1.0956494 | 0.109 | 0.346 | 8.25E-33 | 4 |
| Ninj1.4   | 7.14E-37 | -1.1257938 | 0.045 | 0.261 | 1.17E-32 | 4 |
| Lamp1.4   | 1.61E-36 | -0.8711047 | 0.205 | 0.434 | 2.65E-32 | 4 |
| Rrbp1.3   | 1.81E-36 | -0.7747279 | 0.126 | 0.369 | 2.98E-32 | 4 |
| Ptprc.2   | 2.32E-36 | 0.5111012  | 0.629 | 0.423 | 3.82E-32 | 4 |
| Rpl5.2    | 2.64E-36 | 0.39478923 | 0.811 | 0.708 | 4.34E-32 | 4 |
| Atox1.3   | 3.00E-36 | -0.7467729 | 0.238 | 0.477 | 4.93E-32 | 4 |
| Vim.3     | 3.97E-36 | -0.7338055 | 0.462 | 0.637 | 6.53E-32 | 4 |
| Cnn2.2    | 7.88E-36 | 0.59634533 | 0.532 | 0.33  | 1.30E-31 | 4 |
| H2-Aa.7   | 7.75E-59 | 0.61332859 | 1     | 0.733 | 1.27E-54 | 9 |
| Atp6v0b.3 | 3.70E-35 | -0.7833037 | 0.145 | 0.38  | 6.08E-31 | 4 |
| Cyba.1    | 1.10E-34 | -0.5131799 | 0.576 | 0.731 | 1.81E-30 | 4 |
| Jak1.1    | 3.50E-34 | 0.5241334  | 0.507 | 0.302 | 5.75E-30 | 4 |
| Ahnak.4   | 2.88E-33 | -0.7146939 | 0.345 | 0.566 | 4.73E-29 | 4 |
| Kdm6b.4   | 2.95E-33 | -0.8090141 | 0.113 | 0.331 | 4.86E-29 | 4 |
| Lyn.2     | 5.39E-33 | -0.8328932 | 0.054 | 0.259 | 8.86E-29 | 4 |
| Iitm2b.4  | 2.75E-32 | -0.7098097 | 0.704 | 0.795 | 4.52E-28 | 4 |
| Myl12b.3  | 3.39E-32 | 0.4425629  | 0.677 | 0.491 | 5.58E-28 | 4 |
| Btg2.3    | 1.88E-31 | -0.5431549 | 0.525 | 0.685 | 3.09E-27 | 4 |
| Rpl37.1   | 8.13E-31 | 0.26146655 | 0.968 | 0.925 | 1.34E-26 | 4 |
| Gm2a.4    | 1.00E-30 | -0.893282  | 0.103 | 0.304 | 1.65E-26 | 4 |
| Zc3hav1   | 2.18E-30 | 0.57569185 | 0.283 | 0.13  | 3.58E-26 | 4 |
| Rpl22l1.2 | 5.14E-30 | 0.47342662 | 0.609 | 0.427 | 8.45E-26 | 4 |
| Sat1.4    | 1.69E-29 | -0.7594384 | 0.147 | 0.358 | 2.77E-25 | 4 |

|            |          |            |       |       |          |   |
|------------|----------|------------|-------|-------|----------|---|
| Neat1.4    | 2.19E-29 | -0.92971   | 0.144 | 0.344 | 3.61E-25 | 4 |
| Rps26.3    | 4.16E-29 | 0.25833467 | 0.975 | 0.931 | 6.84E-25 | 4 |
| Selplg.3   | 8.30E-29 | 0.50941637 | 0.481 | 0.289 | 1.37E-24 | 4 |
| Rpl7.3     | 1.23E-28 | 0.2887331  | 0.891 | 0.837 | 2.02E-24 | 4 |
| Rpl4.3     | 1.37E-28 | 0.36295883 | 0.764 | 0.633 | 2.26E-24 | 4 |
| Myh9.2     | 1.66E-28 | 0.47548025 | 0.66  | 0.487 | 2.72E-24 | 4 |
| Ly6e.2     | 3.59E-28 | -0.5182613 | 0.669 | 0.758 | 5.90E-24 | 4 |
| Coro1a.3   | 4.93E-28 | 0.31051905 | 0.817 | 0.62  | 8.10E-24 | 4 |
| Prdx6      | 9.01E-28 | 0.56669943 | 0.328 | 0.169 | 1.48E-23 | 4 |
| Napsa.4    | 4.59E-27 | -0.8383247 | 0.095 | 0.28  | 7.56E-23 | 4 |
| Rpl24.2    | 1.41E-26 | 0.29290069 | 0.891 | 0.847 | 2.33E-22 | 4 |
| Rpl36a.3   | 1.86E-26 | 0.35636356 | 0.837 | 0.753 | 3.07E-22 | 4 |
| Npm1.2     | 2.40E-26 | 0.44773591 | 0.669 | 0.517 | 3.95E-22 | 4 |
| Tnfaip3.3  | 2.62E-26 | 0.51921075 | 0.494 | 0.313 | 4.30E-22 | 4 |
| Atpif1.3   | 3.87E-26 | -0.6289509 | 0.135 | 0.332 | 6.36E-22 | 4 |
| Eef1b2.2   | 8.98E-26 | 0.37484168 | 0.765 | 0.661 | 1.48E-21 | 4 |
| Sem1.2     | 1.32E-25 | -0.5198542 | 0.378 | 0.565 | 2.17E-21 | 4 |
| Zfand5.3   | 1.72E-25 | -0.6965923 | 0.095 | 0.278 | 2.83E-21 | 4 |
| Erp29.2    | 4.88E-25 | -0.5538611 | 0.183 | 0.384 | 8.03E-21 | 4 |
| Arhgap45.3 | 8.05E-25 | 0.45500961 | 0.472 | 0.3   | 1.32E-20 | 4 |
| Bin2       | 3.77E-24 | 0.48089211 | 0.265 | 0.13  | 6.20E-20 | 4 |
| Retnla.2   | 3.82E-24 | -2.852773  | 0.094 | 0.256 | 6.29E-20 | 4 |
| Gabarap.2  | 4.85E-24 | -0.4814479 | 0.397 | 0.581 | 7.98E-20 | 4 |
| Litaf.1    | 5.00E-24 | -0.5865393 | 0.097 | 0.279 | 8.22E-20 | 4 |
| Ier5.3     | 1.21E-23 | -0.613564  | 0.198 | 0.387 | 1.98E-19 | 4 |
| H2-K1.3    | 3.82E-24 | 0.60975145 | 0.937 | 0.834 | 6.28E-20 | 4 |
| Eif3f.3    | 2.35E-23 | 0.33412423 | 0.742 | 0.606 | 3.87E-19 | 4 |
| Fam107b.1  | 4.32E-23 | 0.45486823 | 0.317 | 0.168 | 7.11E-19 | 4 |
| Fyb.3      | 4.90E-23 | 0.48059211 | 0.397 | 0.236 | 8.07E-19 | 4 |
| Cltc.4     | 5.11E-23 | -0.6400991 | 0.166 | 0.347 | 8.40E-19 | 4 |
| Dusp5.2    | 1.14E-22 | 0.54664423 | 0.371 | 0.217 | 1.88E-18 | 4 |
| Gstm1.3    | 2.12E-22 | 0.3350752  | 0.784 | 0.633 | 3.49E-18 | 4 |
| Cebpb.4    | 3.32E-22 | -0.8075168 | 0.177 | 0.344 | 5.45E-18 | 4 |
| Rpl21.3    | 3.70E-22 | 0.34882267 | 0.77  | 0.668 | 6.09E-18 | 4 |
| Gadd45b.3  | 4.01E-22 | -0.654875  | 0.097 | 0.265 | 6.59E-18 | 4 |
| Naca.2     | 5.32E-22 | 0.34463696 | 0.767 | 0.648 | 8.74E-18 | 4 |
| Pabpc1.2   | 5.91E-22 | 0.35442209 | 0.749 | 0.623 | 9.72E-18 | 4 |
| Ptms.2     | 1.38E-21 | -0.5826815 | 0.129 | 0.303 | 2.27E-17 | 4 |
| Zfp36l1.3  | 1.46E-21 | -0.5151698 | 0.356 | 0.544 | 2.41E-17 | 4 |
| Sh3bgrl3.2 | 1.76E-21 | -0.3475338 | 0.652 | 0.757 | 2.90E-17 | 4 |
| Cd82       | 1.84E-21 | 0.49046797 | 0.258 | 0.129 | 3.03E-17 | 4 |
| Gnai2.3    | 7.69E-21 | -0.4826946 | 0.381 | 0.542 | 1.26E-16 | 4 |
| Efh2.2     | 1.00E-20 | -0.5809132 | 0.144 | 0.31  | 1.65E-16 | 4 |

|            |          |            |       |       |          |   |
|------------|----------|------------|-------|-------|----------|---|
| Akap13.1   | 1.05E-20 | 0.44114193 | 0.466 | 0.309 | 1.72E-16 | 4 |
| Gapdh.2    | 1.37E-20 | 0.32680016 | 0.801 | 0.705 | 2.25E-16 | 4 |
| Mif.2      | 1.72E-20 | 0.46170441 | 0.383 | 0.235 | 2.82E-16 | 4 |
| Cnbp.3     | 2.29E-20 | 0.38413401 | 0.572 | 0.416 | 3.77E-16 | 4 |
| Man2b1.3   | 2.65E-20 | -0.5204182 | 0.144 | 0.314 | 4.35E-16 | 4 |
| Nfkbid.3   | 3.85E-20 | -0.6287615 | 0.098 | 0.257 | 6.34E-16 | 4 |
| Stk4       | 4.42E-20 | 0.470849   | 0.282 | 0.151 | 7.26E-16 | 4 |
| Atp2b1.4   | 7.57E-20 | -0.5236938 | 0.192 | 0.361 | 1.25E-15 | 4 |
| Itga4      | 9.73E-20 | 0.50565324 | 0.336 | 0.201 | 1.60E-15 | 4 |
| Arhgdib.3  | 1.99E-19 | 0.32721949 | 0.695 | 0.586 | 3.27E-15 | 4 |
| Akr1a1.3   | 2.65E-19 | -0.5077792 | 0.198 | 0.367 | 4.37E-15 | 4 |
| Clta.4     | 2.72E-19 | -0.4752291 | 0.411 | 0.562 | 4.47E-15 | 4 |
| Stk17b.3   | 3.97E-19 | 0.34879986 | 0.581 | 0.423 | 6.53E-15 | 4 |
| Snx5.4     | 5.07E-19 | -0.5956146 | 0.174 | 0.33  | 8.34E-15 | 4 |
| Stat1      | 5.11E-19 | 0.46383563 | 0.289 | 0.16  | 8.41E-15 | 4 |
| Vamp8.3    | 7.27E-19 | -0.4879373 | 0.186 | 0.357 | 1.20E-14 | 4 |
| Rps27l.2   | 1.18E-18 | -0.514603  | 0.158 | 0.322 | 1.94E-14 | 4 |
| Capza2.1   | 1.46E-18 | -0.5279746 | 0.117 | 0.271 | 2.40E-14 | 4 |
| Ctsa.3     | 3.95E-18 | -0.5452629 | 0.144 | 0.297 | 6.49E-14 | 4 |
| Arl6ip5    | 9.09E-18 | 0.46448128 | 0.277 | 0.156 | 1.49E-13 | 4 |
| Rps15.1    | 1.11E-17 | 0.28672566 | 0.751 | 0.667 | 1.83E-13 | 4 |
| Ubal2      | 1.16E-17 | 0.51872074 | 0.327 | 0.204 | 1.90E-13 | 4 |
| Arhgef1.1  | 1.44E-17 | 0.39898238 | 0.339 | 0.202 | 2.38E-13 | 4 |
| Smdt1.2    | 4.03E-17 | -0.4602029 | 0.205 | 0.366 | 6.62E-13 | 4 |
| Btf3.2     | 4.12E-17 | 0.29104356 | 0.71  | 0.603 | 6.78E-13 | 4 |
| Mef2c.2    | 4.71E-17 | -0.6083046 | 0.113 | 0.254 | 7.75E-13 | 4 |
| Klf6.4     | 5.03E-17 | -0.6513413 | 0.421 | 0.541 | 8.28E-13 | 4 |
| Syng1.3    | 7.29E-17 | -0.5453309 | 0.119 | 0.26  | 1.20E-12 | 4 |
| Rel.4      | 7.33E-17 | -0.5928273 | 0.148 | 0.293 | 1.21E-12 | 4 |
| Rtn4.3     | 1.23E-16 | -0.5158346 | 0.122 | 0.263 | 2.03E-12 | 4 |
| Tagln2.2   | 1.52E-16 | -0.4567713 | 0.355 | 0.502 | 2.51E-12 | 4 |
| Snx3.3     | 1.90E-16 | -0.428071  | 0.208 | 0.364 | 3.12E-12 | 4 |
| Polr2a.1   | 5.33E-16 | 0.42981725 | 0.328 | 0.204 | 8.76E-12 | 4 |
| Pde4b.4    | 7.43E-16 | -0.4545179 | 0.277 | 0.431 | 1.22E-11 | 4 |
| Ifi27l2a.3 | 6.51E-15 | -0.7425833 | 0.284 | 0.414 | 1.07E-10 | 4 |
| Rpl17.2    | 1.33E-14 | 0.30689014 | 0.657 | 0.563 | 2.18E-10 | 4 |
| Dad1.2     | 3.01E-14 | 0.32657208 | 0.444 | 0.314 | 4.95E-10 | 4 |
| Birc6      | 6.19E-14 | 0.39753099 | 0.276 | 0.168 | 1.02E-09 | 4 |
| Sdcbp.3    | 6.71E-14 | -0.4590301 | 0.154 | 0.286 | 1.10E-09 | 4 |
| Serp1.2    | 7.20E-14 | -0.4590621 | 0.251 | 0.388 | 1.18E-09 | 4 |
| H3f3a.3    | 9.62E-14 | -0.3479707 | 0.652 | 0.746 | 1.58E-09 | 4 |
| Elf1       | 9.66E-14 | 0.41102952 | 0.317 | 0.203 | 1.59E-09 | 4 |
| Canx.3     | 1.52E-13 | -0.3854513 | 0.164 | 0.299 | 2.51E-09 | 4 |

|           |          |            |       |       |          |   |
|-----------|----------|------------|-------|-------|----------|---|
| Mbnl1     | 3.51E-13 | 0.38820029 | 0.444 | 0.33  | 5.77E-09 | 4 |
| Psmb8.2   | 4.34E-13 | 0.33605357 | 0.589 | 0.469 | 7.14E-09 | 4 |
| Gng5.3    | 4.93E-13 | -0.3338898 | 0.479 | 0.608 | 8.11E-09 | 4 |
| Rbm39.3   | 5.78E-13 | 0.29941686 | 0.619 | 0.523 | 9.51E-09 | 4 |
| Tmed10.2  | 7.68E-13 | -0.4052929 | 0.166 | 0.296 | 1.26E-08 | 4 |
| Nr4a2.1   | 1.16E-12 | 0.55269745 | 0.295 | 0.193 | 1.90E-08 | 4 |
| Serf2.2   | 3.21E-12 | -0.2637665 | 0.702 | 0.767 | 5.28E-08 | 4 |
| Tgfb1     | 3.52E-12 | -0.3974297 | 0.208 | 0.34  | 5.79E-08 | 4 |
| Prkar1a   | 4.13E-12 | 0.39022978 | 0.327 | 0.222 | 6.79E-08 | 4 |
| Odc1      | 4.31E-12 | 0.34541372 | 0.287 | 0.181 | 7.08E-08 | 4 |
| Fxyd5.4   | 4.36E-12 | 0.25023546 | 0.594 | 0.453 | 7.17E-08 | 4 |
| Capg.2    | 4.73E-12 | -0.4833995 | 0.151 | 0.268 | 7.77E-08 | 4 |
| Hsp90b1.1 | 4.90E-12 | -0.3936252 | 0.353 | 0.486 | 8.06E-08 | 4 |
| Ier2.3    | 6.36E-12 | -0.4928122 | 0.462 | 0.565 | 1.05E-07 | 4 |
| Rpl9.1    | 6.99E-12 | 0.26635691 | 0.695 | 0.623 | 1.15E-07 | 4 |
| Cdk2ap2.3 | 9.59E-12 | 0.29535344 | 0.371 | 0.256 | 1.58E-07 | 4 |
| Atp6v1g1  | 1.21E-11 | -0.3743709 | 0.179 | 0.303 | 1.99E-07 | 4 |
| Cstb.3    | 1.31E-11 | -0.4297769 | 0.151 | 0.267 | 2.15E-07 | 4 |
| Ppp1r18.1 | 1.66E-11 | 0.3739904  | 0.355 | 0.25  | 2.73E-07 | 4 |
| Cirbp     | 1.79E-11 | 0.31901115 | 0.258 | 0.16  | 2.95E-07 | 4 |
| Eif3h.2   | 1.98E-11 | 0.31634363 | 0.507 | 0.4   | 3.26E-07 | 4 |
| Anxa6     | 2.17E-11 | 0.33465975 | 0.28  | 0.181 | 3.57E-07 | 4 |
| Ppp1r12a  | 2.42E-11 | 0.39787236 | 0.298 | 0.199 | 3.99E-07 | 4 |
| Eif3e.2   | 2.76E-11 | 0.33829984 | 0.361 | 0.256 | 4.54E-07 | 4 |
| Ccnl1.3   | 3.35E-11 | -0.3952395 | 0.195 | 0.317 | 5.51E-07 | 4 |
| Nsa2.1    | 7.84E-11 | 0.32537985 | 0.51  | 0.415 | 1.29E-06 | 4 |
| Rpl10.1   | 1.01E-10 | -0.2593964 | 0.579 | 0.686 | 1.66E-06 | 4 |
| Gstp1.2   | 1.07E-10 | 0.30323242 | 0.397 | 0.288 | 1.76E-06 | 4 |
| Prdx5.2   | 1.15E-10 | -0.3907968 | 0.224 | 0.346 | 1.89E-06 | 4 |
| Atp6v0c.3 | 1.25E-10 | -0.4113511 | 0.326 | 0.433 | 2.06E-06 | 4 |
| Arpc1b.2  | 1.76E-10 | -0.2824446 | 0.529 | 0.632 | 2.90E-06 | 4 |
| Ezr.3     | 2.71E-10 | 0.33406247 | 0.328 | 0.228 | 4.45E-06 | 4 |
| Psme2.3   | 3.21E-10 | 0.33800022 | 0.425 | 0.326 | 5.28E-06 | 4 |
| Psme1.2   | 3.44E-10 | 0.31250573 | 0.496 | 0.396 | 5.67E-06 | 4 |
| Dbi.1     | 3.84E-10 | -0.3026712 | 0.182 | 0.302 | 6.32E-06 | 4 |
| Sp100.1   | 5.17E-10 | 0.3139983  | 0.308 | 0.21  | 8.51E-06 | 4 |
| Ighm.2    | 6.18E-10 | -0.7969523 | 0.315 | 0.424 | 1.02E-05 | 4 |
| Ube2i     | 1.05E-09 | 0.30396654 | 0.323 | 0.226 | 1.73E-05 | 4 |
| Psmb3.2   | 1.20E-09 | 0.33338927 | 0.355 | 0.262 | 1.97E-05 | 4 |
| Rgs10.4   | 1.28E-09 | -0.3644669 | 0.177 | 0.285 | 2.11E-05 | 4 |
| Ncl.2     | 1.44E-09 | 0.2712968  | 0.465 | 0.366 | 2.38E-05 | 4 |
| Atp1b3    | 1.60E-09 | 0.35906479 | 0.283 | 0.194 | 2.64E-05 | 4 |
| Ldha.2    | 2.08E-09 | 0.31126076 | 0.428 | 0.331 | 3.42E-05 | 4 |

|           |            |            |       |       |            |    |
|-----------|------------|------------|-------|-------|------------|----|
| Aldoa.2   | 2.27E-09   | 0.29383584 | 0.455 | 0.358 | 3.74E-05   | 4  |
| Arl6ip1.1 | 2.64E-09   | 0.3240508  | 0.431 | 0.332 | 4.34E-05   | 4  |
| Gpr132.2  | 5.22E-09   | 0.33739391 | 0.305 | 0.217 | 8.59E-05   | 4  |
| H2-K1.8   | 4.35E-34   | 0.60056299 | 0.978 | 0.84  | 7.16E-30   | 12 |
| Ptpn6.3   | 1.44E-08   | -0.3677794 | 0.172 | 0.267 | 0.00023656 | 4  |
| Itgb7.1   | 2.28E-08   | 0.27867315 | 0.262 | 0.18  | 0.00037462 | 4  |
| Eif5      | 2.74E-08   | 0.30468937 | 0.358 | 0.273 | 0.00045069 | 4  |
| Eef1d.1   | 4.39E-08   | 0.2540311  | 0.49  | 0.404 | 0.00072154 | 4  |
| Vps28     | 4.49E-08   | 0.33109496 | 0.268 | 0.189 | 0.00073879 | 4  |
| Npc2.3    | 7.23E-08   | -0.2796906 | 0.435 | 0.519 | 0.00119004 | 4  |
| Itgb2.3   | 7.54E-08   | 0.28010995 | 0.343 | 0.26  | 0.00124031 | 4  |
| Socs3.4   | 8.65E-08   | -0.4095604 | 0.198 | 0.287 | 0.00142361 | 4  |
| Lgals1.2  | 9.52E-08   | -0.3446556 | 0.308 | 0.412 | 0.00156555 | 4  |
| Nop53     | 1.34E-07   | 0.26287267 | 0.287 | 0.205 | 0.00220792 | 4  |
| Ndfip1    | 1.85E-07   | 0.34531089 | 0.365 | 0.291 | 0.00303886 | 4  |
| Sri.1     | 2.72E-07   | 0.29653041 | 0.326 | 0.246 | 0.00447244 | 4  |
| Serbp1.2  | 2.84E-07   | 0.25236811 | 0.455 | 0.379 | 0.00466405 | 4  |
| Ypel3.2   | 3.17E-07   | 0.27714593 | 0.383 | 0.298 | 0.00522119 | 4  |
| Gsta4.1   | 3.96E-07   | 0.29540272 | 0.296 | 0.219 | 0.0065172  | 4  |
| Laptm4a.2 | 4.18E-07   | -0.2863563 | 0.191 | 0.28  | 0.00687109 | 4  |
| Rbms1.3   | 8.80E-07   | -0.2911938 | 0.179 | 0.264 | 0.01448136 | 4  |
| Ctsd.4    | 1.02E-06   | -0.4100319 | 0.217 | 0.297 | 0.01672139 | 4  |
| Psmb1.2   | 1.02E-06   | 0.2609528  | 0.383 | 0.305 | 0.01683854 | 4  |
| Prrc2c    | 1.18E-06   | 0.28637919 | 0.348 | 0.27  | 0.01942699 | 4  |
| Ppp1cc    | 1.19E-06   | 0.32782195 | 0.274 | 0.203 | 0.01955087 | 4  |
| Apbb1ip   | 1.36E-06   | 0.29246947 | 0.268 | 0.196 | 0.02229151 | 4  |
| Ddx3x.3   | 2.17E-06   | -0.2980054 | 0.194 | 0.275 | 0.03569474 | 4  |
| Park7.1   | 3.53E-06   | 0.25781241 | 0.331 | 0.259 | 0.05801497 | 4  |
| Nap1l1.1  | 6.90E-06   | -0.2655237 | 0.189 | 0.268 | 0.11341895 | 4  |
| Cct2      | 7.34E-06   | 0.25187561 | 0.251 | 0.186 | 0.12074744 | 4  |
| Sqstm1.2  | 8.78E-06   | -0.2901269 | 0.306 | 0.389 | 0.14450344 | 4  |
| Tuba1b    | 1.02E-05   | -0.3055352 | 0.248 | 0.327 | 0.16781698 | 4  |
| Ptp4a2.2  | 2.48E-05   | -0.2778342 | 0.233 | 0.304 | 0.40799203 | 4  |
| Anxa2.4   | 2.55E-05   | -0.3081251 | 0.213 | 0.281 | 0.41978201 | 4  |
| Igkv1-117 | 4.03E-05   | -1.1431288 | 0.273 | 0.197 | 0.66232183 | 4  |
| Akr1b3    | 5.15E-05   | 0.28639192 | 0.265 | 0.207 | 0.84775361 | 4  |
| Dnaja1.1  | 5.65E-05   | 0.26196844 | 0.308 | 0.251 | 0.92938284 | 4  |
| Lsp1.4    | 5.78E-05   | -0.3472633 | 0.355 | 0.4   | 0.95109532 | 4  |
| Klf2.3    | 0.00083669 | -0.2787714 | 0.559 | 0.598 | 1          | 4  |
| Cd79a.4   | 0.00971924 | -0.6157789 | 0.236 | 0.253 | 1          | 4  |
| Chil3     | 0          | 2.21125505 | 0.33  | 0.002 | 0          | 5  |
| Thbs1     | 0          | 2.1447133  | 0.481 | 0.015 | 0          | 5  |
| Plac8     | 4.47E-308  | 2.10492597 | 0.766 | 0.132 | 7.34E-304  | 5  |

|           |           |            |       |       |           |   |
|-----------|-----------|------------|-------|-------|-----------|---|
| Gngt2     | 0         | 2.02542473 | 0.627 | 0.073 | 0         | 5 |
| Msrb1     | 0         | 1.98133707 | 0.663 | 0.084 | 0         | 5 |
| Hp        | 0         | 1.63564917 | 0.387 | 0.003 | 0         | 5 |
| Ly6c2     | 6.05E-215 | 1.57318114 | 0.4   | 0.039 | 9.96E-211 | 5 |
| Lyz2.5    | 1.25E-183 | 1.55911005 | 0.989 | 0.529 | 2.05E-179 | 5 |
| Ace       | 0         | 1.55554308 | 0.319 | 0.003 | 0         | 5 |
| Ifitm3.5  | 1.73E-196 | 1.54060813 | 0.96  | 0.463 | 2.84E-192 | 5 |
| Gsr       | 5.07E-277 | 1.4643368  | 0.445 | 0.037 | 8.34E-273 | 5 |
| Lst1.1    | 5.91E-195 | 1.4238104  | 0.681 | 0.147 | 9.72E-191 | 5 |
| Il1b.4    | 1.57E-141 | 1.42285622 | 0.733 | 0.215 | 2.58E-137 | 5 |
| Cebpb.5   | 2.11E-172 | 1.41777715 | 0.838 | 0.299 | 3.47E-168 | 5 |
| Ifitm6.1  | 7.88E-192 | 1.41684111 | 0.562 | 0.1   | 1.30E-187 | 5 |
| Sirpb1c   | 0         | 1.3928211  | 0.411 | 0.006 | 0         | 5 |
| Ms4a6c.3  | 3.47E-156 | 1.35633028 | 0.692 | 0.201 | 5.70E-152 | 5 |
| Pglyrp1   | 6.24E-57  | 1.308631   | 0.27  | 0.068 | 1.03E-52  | 5 |
| Prdx5.3   | 1.54E-120 | 1.30491913 | 0.746 | 0.311 | 2.53E-116 | 5 |
| Cd300a    | 9.73E-194 | 1.27568882 | 0.465 | 0.064 | 1.60E-189 | 5 |
| Plaur     | 5.71E-152 | 1.25394168 | 0.458 | 0.08  | 9.39E-148 | 5 |
| Gm9733    | 0         | 1.25377666 | 0.315 | 0.004 | 0         | 5 |
| Lgals3.4  | 5.52E-140 | 1.24937281 | 0.809 | 0.322 | 9.09E-136 | 5 |
| Fgr       | 9.42E-184 | 1.20662853 | 0.389 | 0.046 | 1.55E-179 | 5 |
| Cybb.3    | 7.66E-146 | 1.19917183 | 0.809 | 0.3   | 1.26E-141 | 5 |
| Ifitm2.5  | 1.46E-141 | 1.19589453 | 0.874 | 0.362 | 2.40E-137 | 5 |
| Cd300c2   | 1.25E-159 | 1.18742276 | 0.445 | 0.072 | 2.06E-155 | 5 |
| Clec4a3   | 1.47E-151 | 1.13258231 | 0.497 | 0.093 | 2.41E-147 | 5 |
| Alox5ap.5 | 2.95E-127 | 1.12238193 | 0.854 | 0.37  | 4.86E-123 | 5 |
| Fyb.4     | 6.88E-121 | 1.11616449 | 0.692 | 0.223 | 1.13E-116 | 5 |
| Cdk2ap2.4 | 3.50E-84  | 1.10957212 | 0.629 | 0.244 | 5.75E-80  | 5 |
| Fn1       | 3.07E-144 | 1.10303886 | 0.413 | 0.064 | 5.05E-140 | 5 |
| Tyrobp.5  | 5.11E-160 | 1.09948648 | 0.978 | 0.586 | 8.41E-156 | 5 |
| Slc16a3   | 1.88E-210 | 1.07027488 | 0.285 | 0.018 | 3.09E-206 | 5 |
| Nfil3     | 1.27E-110 | 1.03747894 | 0.42  | 0.088 | 2.08E-106 | 5 |
| Taldo1.2  | 1.34E-93  | 1.03673164 | 0.663 | 0.256 | 2.20E-89  | 5 |
| Lrp1      | 6.03E-102 | 1.01288649 | 0.461 | 0.113 | 9.91E-98  | 5 |
| Emilin2   | 6.05E-150 | 1.0123271  | 0.355 | 0.046 | 9.96E-146 | 5 |
| Ceacam1   | 9.16E-164 | 1.01181398 | 0.267 | 0.022 | 1.51E-159 | 5 |
| Gpx1.5    | 8.32E-133 | 1.01122454 | 0.984 | 0.695 | 1.37E-128 | 5 |
| Smpdl3a   | 8.78E-79  | 1.01085984 | 0.463 | 0.142 | 1.44E-74  | 5 |
| Fcer1g.4  | 7.07E-141 | 1.00930653 | 0.982 | 0.553 | 1.16E-136 | 5 |
| Spi1.4    | 4.50E-83  | 0.99552401 | 0.67  | 0.283 | 7.39E-79  | 5 |
| Cd44.1    | 1.40E-61  | 0.97418562 | 0.483 | 0.175 | 2.30E-57  | 5 |
| Sat1.5    | 1.75E-63  | 0.96902279 | 0.667 | 0.32  | 2.88E-59  | 5 |
| Psap.3    | 7.87E-122 | 0.96734699 | 0.962 | 0.659 | 1.29E-117 | 5 |



|            |           |            |       |       |           |   |
|------------|-----------|------------|-------|-------|-----------|---|
| Adgre5.3   | 5.01E-77  | 0.96021301 | 0.584 | 0.221 | 8.25E-73  | 5 |
| Rnf149     | 4.30E-84  | 0.95378165 | 0.373 | 0.088 | 7.07E-80  | 5 |
| Ncf2       | 5.18E-79  | 0.95159457 | 0.494 | 0.156 | 8.53E-75  | 5 |
| Ctss.3     | 5.17E-102 | 0.95007058 | 0.856 | 0.48  | 8.50E-98  | 5 |
| Ms4a4c     | 4.81E-104 | 0.94484851 | 0.326 | 0.056 | 7.92E-100 | 5 |
| Hck        | 2.85E-86  | 0.94224328 | 0.353 | 0.078 | 4.70E-82  | 5 |
| Irf7       | 2.95E-91  | 0.93355007 | 0.27  | 0.043 | 4.85E-87  | 5 |
| Sgk1       | 1.03E-76  | 0.92730786 | 0.261 | 0.048 | 1.69E-72  | 5 |
| Ifi27l2a.4 | 2.25E-59  | 0.92257315 | 0.708 | 0.384 | 3.70E-55  | 5 |
| Cx3cr1     | 2.35E-117 | 0.91556283 | 0.335 | 0.051 | 3.87E-113 | 5 |
| Cdkn1a.2   | 7.44E-76  | 0.91550922 | 0.578 | 0.21  | 1.22E-71  | 5 |
| Mgst1      | 7.57E-85  | 0.90943365 | 0.342 | 0.072 | 1.24E-80  | 5 |
| Plbd1.4    | 5.16E-86  | 0.90192976 | 0.618 | 0.218 | 8.48E-82  | 5 |
| Tpd52      | 6.35E-83  | 0.89442214 | 0.483 | 0.142 | 1.04E-78  | 5 |
| Samhd1     | 3.19E-71  | 0.89336735 | 0.643 | 0.279 | 5.25E-67  | 5 |
| Prkcd      | 4.88E-77  | 0.88724095 | 0.503 | 0.164 | 8.02E-73  | 5 |
| Ccr2.1     | 7.55E-59  | 0.88283165 | 0.492 | 0.184 | 1.24E-54  | 5 |
| Tnfrsf1b   | 3.78E-57  | 0.88073965 | 0.346 | 0.101 | 6.21E-53  | 5 |
| Itgal      | 3.24E-57  | 0.86263195 | 0.351 | 0.104 | 5.33E-53  | 5 |
| Ms4a4a.1   | 9.73E-75  | 0.84488317 | 0.351 | 0.084 | 1.60E-70  | 5 |
| Stk10      | 5.80E-52  | 0.84424529 | 0.393 | 0.135 | 9.54E-48  | 5 |
| Flna.3     | 1.93E-59  | 0.84270172 | 0.62  | 0.279 | 3.18E-55  | 5 |
| Fxyd5.5    | 4.12E-74  | 0.83340744 | 0.793 | 0.445 | 6.77E-70  | 5 |
| Nfam1.1    | 1.03E-54  | 0.83006763 | 0.384 | 0.125 | 1.69E-50  | 5 |
| Mpeg1.1    | 2.66E-65  | 0.82772374 | 0.51  | 0.185 | 4.37E-61  | 5 |
| Cyp4f18    | 8.55E-69  | 0.81965896 | 0.319 | 0.075 | 1.41E-64  | 5 |
| Tkt.1      | 2.42E-56  | 0.81587978 | 0.499 | 0.199 | 3.99E-52  | 5 |
| Gm36161    | 5.61E-80  | 0.81485442 | 0.339 | 0.075 | 9.24E-76  | 5 |
| Anxa2.5    | 1.31E-54  | 0.81427651 | 0.578 | 0.257 | 2.16E-50  | 5 |
| Itga4.1    | 3.13E-68  | 0.80170804 | 0.535 | 0.194 | 5.14E-64  | 5 |
| Clec4a1.1  | 9.17E-66  | 0.79866519 | 0.375 | 0.105 | 1.51E-61  | 5 |
| Cyba.2     | 2.97E-100 | 0.79220907 | 0.962 | 0.703 | 4.89E-96  | 5 |
| Tnfrsf1a.1 | 1.81E-55  | 0.79017992 | 0.42  | 0.145 | 2.98E-51  | 5 |
| Pou2f2.1   | 1.65E-38  | 0.78850077 | 0.425 | 0.182 | 2.71E-34  | 5 |
| Ptpre.1    | 2.89E-46  | 0.78568173 | 0.371 | 0.132 | 4.75E-42  | 5 |
| Ear2.1     | 3.30E-36  | 0.76483335 | 0.252 | 0.079 | 5.43E-32  | 5 |
| Gm21188    | 1.83E-70  | 0.76156497 | 0.308 | 0.069 | 3.01E-66  | 5 |
| Rap1a.1    | 7.38E-49  | 0.74940747 | 0.553 | 0.258 | 1.21E-44  | 5 |
| Nadk       | 1.60E-53  | 0.74897109 | 0.326 | 0.095 | 2.62E-49  | 5 |
| Tnfsf13    | 2.59E-89  | 0.74657914 | 0.297 | 0.052 | 4.26E-85  | 5 |
| Irf5.1     | 2.44E-47  | 0.73542508 | 0.409 | 0.153 | 4.01E-43  | 5 |
| Pla2g7.1   | 7.26E-51  | 0.73114396 | 0.346 | 0.106 | 1.19E-46  | 5 |
| Apbb1ip.1  | 8.99E-48  | 0.73043828 | 0.463 | 0.187 | 1.48E-43  | 5 |

|          |          |            |       |       |          |   |
|----------|----------|------------|-------|-------|----------|---|
| Coro1a.4 | 2.06E-78 | 0.72320507 | 0.924 | 0.62  | 3.38E-74 | 5 |
| S100a4.1 | 1.57E-50 | 0.72284878 | 0.445 | 0.165 | 2.59E-46 | 5 |
| Pirb     | 1.78E-47 | 0.7182871  | 0.351 | 0.118 | 2.93E-43 | 5 |
| Agpat4   | 1.31E-45 | 0.71754484 | 0.265 | 0.075 | 2.16E-41 | 5 |
| Itgb2.4  | 2.00E-36 | 0.7116683  | 0.506 | 0.253 | 3.28E-32 | 5 |
| Rasgrp2  | 3.72E-44 | 0.71048822 | 0.297 | 0.09  | 6.12E-40 | 5 |
| Ccl6.5   | 1.83E-60 | 0.70737165 | 0.773 | 0.391 | 3.00E-56 | 5 |
| Lyn.3    | 6.23E-47 | 0.69894492 | 0.517 | 0.225 | 1.03E-42 | 5 |
| Mrpl33   | 1.35E-45 | 0.69131636 | 0.483 | 0.203 | 2.22E-41 | 5 |
| Myo1g.1  | 2.95E-35 | 0.68684491 | 0.362 | 0.145 | 4.85E-31 | 5 |
| Arpc1b.3 | 1.37E-64 | 0.68000174 | 0.876 | 0.608 | 2.25E-60 | 5 |
| Ifngr1.2 | 9.47E-46 | 0.67561676 | 0.676 | 0.365 | 1.56E-41 | 5 |
| AB124611 | 3.25E-46 | 0.67533939 | 0.357 | 0.12  | 5.35E-42 | 5 |
| Metrn1   | 2.01E-49 | 0.67304548 | 0.306 | 0.088 | 3.30E-45 | 5 |
| Nfe2l2.1 | 1.07E-35 | 0.66984722 | 0.413 | 0.179 | 1.76E-31 | 5 |
| Ptpn1    | 9.75E-46 | 0.66638932 | 0.521 | 0.23  | 1.60E-41 | 5 |
| Plin2    | 4.19E-42 | 0.65806298 | 0.328 | 0.109 | 6.90E-38 | 5 |
| Bin2.1   | 4.43E-40 | 0.64178181 | 0.355 | 0.129 | 7.28E-36 | 5 |
| Csf2ra.1 | 9.31E-41 | 0.64107582 | 0.362 | 0.132 | 1.53E-36 | 5 |
| Rap1b.3  | 2.54E-33 | 0.63989058 | 0.654 | 0.401 | 4.18E-29 | 5 |
| Anxa1    | 3.89E-29 | 0.63934792 | 0.339 | 0.142 | 6.39E-25 | 5 |
| Srgn.3   | 6.73E-43 | 0.63686106 | 0.881 | 0.66  | 1.11E-38 | 5 |
| Tln1.1   | 1.25E-42 | 0.63286632 | 0.703 | 0.411 | 2.06E-38 | 5 |
| Eno1.2   | 5.14E-42 | 0.6316999  | 0.676 | 0.397 | 8.45E-38 | 5 |
| Tgfb1.1  | 2.98E-35 | 0.63142699 | 0.589 | 0.313 | 4.89E-31 | 5 |
| Fmnl1.1  | 2.64E-37 | 0.63091658 | 0.454 | 0.201 | 4.34E-33 | 5 |
| Calm1.1  | 3.54E-38 | 0.62708866 | 0.874 | 0.707 | 5.83E-34 | 5 |
| Degs1    | 2.62E-41 | 0.621512   | 0.292 | 0.092 | 4.32E-37 | 5 |
| Gda      | 1.41E-31 | 0.6202545  | 0.301 | 0.112 | 2.33E-27 | 5 |
| Msn.3    | 2.06E-33 | 0.61921513 | 0.683 | 0.42  | 3.39E-29 | 5 |
| Rhog     | 1.27E-32 | 0.61558013 | 0.53  | 0.278 | 2.09E-28 | 5 |
| Pld4.4   | 1.71E-36 | 0.60887412 | 0.587 | 0.31  | 2.81E-32 | 5 |
| Pkm.2    | 2.18E-33 | 0.60759202 | 0.551 | 0.294 | 3.59E-29 | 5 |
| Cytip.4  | 4.64E-36 | 0.6062288  | 0.589 | 0.312 | 7.63E-32 | 5 |
| Ucp2.2   | 1.14E-49 | 0.60609945 | 0.831 | 0.584 | 1.87E-45 | 5 |
| H3f3a.4  | 2.70E-63 | 0.60502351 | 0.91  | 0.728 | 4.45E-59 | 5 |
| Psm7.1   | 5.56E-42 | 0.60433651 | 0.611 | 0.315 | 9.14E-38 | 5 |
| Prr13.2  | 4.70E-22 | 0.60320126 | 0.454 | 0.256 | 7.72E-18 | 5 |
| Klf13    | 1.86E-30 | 0.60168334 | 0.348 | 0.146 | 3.05E-26 | 5 |
| Sln5     | 2.14E-35 | 0.60011675 | 0.258 | 0.082 | 3.52E-31 | 5 |
| Emp3.2   | 2.66E-29 | 0.58825518 | 0.654 | 0.421 | 4.37E-25 | 5 |
| Glud1.1  | 5.50E-35 | 0.57845375 | 0.515 | 0.254 | 9.05E-31 | 5 |
| Aprt     | 9.59E-38 | 0.56830477 | 0.375 | 0.145 | 1.58E-33 | 5 |

|              |          |            |       |       |          |   |
|--------------|----------|------------|-------|-------|----------|---|
| Lsp1.5       | 1.34E-44 | 0.56760511 | 0.724 | 0.377 | 2.20E-40 | 5 |
| Tgfb1.4      | 1.57E-37 | 0.56266759 | 0.494 | 0.22  | 2.58E-33 | 5 |
| Vim.4        | 4.89E-26 | 0.56223128 | 0.796 | 0.612 | 8.04E-22 | 5 |
| Il10ra.1     | 6.93E-26 | 0.55936572 | 0.371 | 0.173 | 1.14E-21 | 5 |
| Fam49b.2     | 2.28E-28 | 0.55896899 | 0.526 | 0.286 | 3.75E-24 | 5 |
| Napsa.5      | 2.35E-38 | 0.55843459 | 0.535 | 0.248 | 3.86E-34 | 5 |
| Ptpn6.4      | 4.02E-28 | 0.54249389 | 0.476 | 0.246 | 6.61E-24 | 5 |
| Lrrc25.1     | 4.34E-37 | 0.54232962 | 0.326 | 0.115 | 7.14E-33 | 5 |
| Lrrfip1      | 8.62E-27 | 0.54127771 | 0.339 | 0.149 | 1.42E-22 | 5 |
| Gm2a.5       | 1.82E-35 | 0.5412191  | 0.551 | 0.27  | 3.00E-31 | 5 |
| Coro1b.2     | 1.44E-26 | 0.53453459 | 0.449 | 0.232 | 2.37E-22 | 5 |
| Myo1f        | 2.69E-24 | 0.53316208 | 0.281 | 0.118 | 4.43E-20 | 5 |
| Adipor1      | 6.27E-23 | 0.53252786 | 0.375 | 0.182 | 1.03E-18 | 5 |
| Cd14.4       | 1.59E-30 | 0.52936705 | 0.499 | 0.246 | 2.62E-26 | 5 |
| Sem1.3       | 1.47E-32 | 0.52371026 | 0.773 | 0.536 | 2.42E-28 | 5 |
| Atp1a1.1     | 1.85E-21 | 0.51907403 | 0.409 | 0.217 | 3.05E-17 | 5 |
| Capza2.2     | 2.43E-27 | 0.51525227 | 0.479 | 0.245 | 4.00E-23 | 5 |
| Klf3         | 2.21E-23 | 0.51490485 | 0.344 | 0.16  | 3.64E-19 | 5 |
| S100a6.4     | 4.76E-43 | 0.51278422 | 0.93  | 0.742 | 7.83E-39 | 5 |
| 1110008F13Ri | 8.66E-23 | 0.50937222 | 0.373 | 0.183 | 1.42E-18 | 5 |
| Ccdc12       | 1.48E-18 | 0.50829855 | 0.391 | 0.218 | 2.44E-14 | 5 |
| Gpcpd1       | 4.33E-15 | 0.50760949 | 0.285 | 0.149 | 7.12E-11 | 5 |
| Tmem14c      | 2.12E-30 | 0.50759347 | 0.382 | 0.166 | 3.49E-26 | 5 |
| Clec12a      | 4.04E-28 | 0.50130467 | 0.272 | 0.102 | 6.65E-24 | 5 |
| Atp6v1b2     | 4.07E-23 | 0.49704295 | 0.285 | 0.122 | 6.70E-19 | 5 |
| Cd68.4       | 4.89E-29 | 0.49417416 | 0.506 | 0.258 | 8.04E-25 | 5 |
| Sema4d       | 3.49E-25 | 0.49040774 | 0.283 | 0.114 | 5.75E-21 | 5 |
| Csf2rb       | 3.78E-21 | 0.48881633 | 0.267 | 0.116 | 6.22E-17 | 5 |
| Atox1.4      | 9.99E-33 | 0.48671619 | 0.724 | 0.44  | 1.64E-28 | 5 |
| Npc2.4       | 7.45E-26 | 0.48625513 | 0.692 | 0.501 | 1.23E-21 | 5 |
| Rac1.1       | 4.98E-26 | 0.48202683 | 0.652 | 0.421 | 8.19E-22 | 5 |
| Ms4a6b.1     | 6.91E-23 | 0.48007393 | 0.315 | 0.139 | 1.14E-18 | 5 |
| Ostf1.1      | 7.94E-19 | 0.47247012 | 0.499 | 0.303 | 1.31E-14 | 5 |
| Rhoa         | 3.69E-24 | 0.47049643 | 0.706 | 0.492 | 6.07E-20 | 5 |
| Fam105a      | 1.01E-27 | 0.46520682 | 0.297 | 0.116 | 1.66E-23 | 5 |
| Ccnd3.1      | 6.39E-22 | 0.46469391 | 0.324 | 0.151 | 1.05E-17 | 5 |
| Ctsa.4       | 1.45E-29 | 0.46123663 | 0.53  | 0.269 | 2.39E-25 | 5 |
| Snx20.1      | 5.12E-23 | 0.46015228 | 0.339 | 0.156 | 8.42E-19 | 5 |
| Rassf4.4     | 7.21E-22 | 0.45797718 | 0.436 | 0.234 | 1.19E-17 | 5 |
| Arpc2.3      | 8.83E-34 | 0.45795477 | 0.858 | 0.655 | 1.45E-29 | 5 |
| Sirpa.1      | 2.84E-25 | 0.45786187 | 0.38  | 0.176 | 4.67E-21 | 5 |
| Ptprc.3      | 6.59E-26 | 0.45738525 | 0.667 | 0.427 | 1.08E-21 | 5 |
| Ccl9.5       | 5.29E-25 | 0.45588274 | 0.447 | 0.221 | 8.71E-21 | 5 |

|           |          |            |       |       |          |   |
|-----------|----------|------------|-------|-------|----------|---|
| Ctsz.3    | 1.58E-21 | 0.4550949  | 0.553 | 0.341 | 2.60E-17 | 5 |
| Aup1      | 6.73E-17 | 0.44502326 | 0.373 | 0.206 | 1.11E-12 | 5 |
| Atp6v1e1  | 1.37E-16 | 0.44363994 | 0.254 | 0.118 | 2.25E-12 | 5 |
| Fam96a    | 1.75E-16 | 0.4426553  | 0.263 | 0.127 | 2.87E-12 | 5 |
| Dbi.2     | 3.30E-22 | 0.44246392 | 0.494 | 0.28  | 5.43E-18 | 5 |
| Gstp1.3   | 2.39E-15 | 0.44216574 | 0.465 | 0.288 | 3.93E-11 | 5 |
| Actg1.3   | 1.10E-42 | 0.44157392 | 0.969 | 0.897 | 1.81E-38 | 5 |
| Zeb2.4    | 3.13E-24 | 0.43872369 | 0.519 | 0.282 | 5.14E-20 | 5 |
| Iscu      | 7.35E-18 | 0.43598774 | 0.348 | 0.182 | 1.21E-13 | 5 |
| Il6ra     | 9.76E-20 | 0.43523173 | 0.254 | 0.109 | 1.61E-15 | 5 |
| Creg1.2   | 1.18E-16 | 0.43220091 | 0.362 | 0.195 | 1.95E-12 | 5 |
| Mtpn      | 2.01E-15 | 0.43054846 | 0.285 | 0.147 | 3.31E-11 | 5 |
| Dusp5.3   | 2.62E-13 | 0.42861212 | 0.369 | 0.222 | 4.31E-09 | 5 |
| Lamtor4   | 7.47E-20 | 0.42547785 | 0.387 | 0.201 | 1.23E-15 | 5 |
| Cmpk1     | 2.88E-20 | 0.4206722  | 0.317 | 0.149 | 4.73E-16 | 5 |
| Zyx.4     | 6.05E-17 | 0.42043988 | 0.434 | 0.253 | 9.96E-13 | 5 |
| Ncf4      | 3.96E-23 | 0.41996148 | 0.285 | 0.12  | 6.51E-19 | 5 |
| Rnh1      | 4.51E-18 | 0.41454363 | 0.308 | 0.152 | 7.41E-14 | 5 |
| Ppp1ca.2  | 5.35E-23 | 0.4124606  | 0.596 | 0.363 | 8.80E-19 | 5 |
| Capzb.2   | 1.02E-19 | 0.41092119 | 0.663 | 0.462 | 1.67E-15 | 5 |
| Trim25    | 7.87E-24 | 0.41039424 | 0.294 | 0.123 | 1.30E-19 | 5 |
| Lamp1.5   | 7.70E-28 | 0.40947358 | 0.674 | 0.399 | 1.27E-23 | 5 |
| Iqgap1.1  | 1.51E-19 | 0.40836019 | 0.64  | 0.429 | 2.48E-15 | 5 |
| Arpc3.1   | 2.41E-24 | 0.40793271 | 0.735 | 0.513 | 3.96E-20 | 5 |
| Ly86.2    | 2.30E-16 | 0.40792184 | 0.492 | 0.308 | 3.78E-12 | 5 |
| Nr4a1.2   | 4.78E-21 | 0.40700811 | 0.726 | 0.492 | 7.86E-17 | 5 |
| Laptm4a.3 | 4.41E-21 | 0.4045816  | 0.476 | 0.26  | 7.25E-17 | 5 |
| Fis1.2    | 2.65E-15 | 0.40122579 | 0.463 | 0.29  | 4.35E-11 | 5 |
| Myl12b.4  | 8.79E-21 | 0.40087885 | 0.701 | 0.496 | 1.45E-16 | 5 |
| Pomp.1    | 1.04E-17 | 0.39739518 | 0.51  | 0.311 | 1.70E-13 | 5 |
| Cmtm7     | 1.16E-15 | 0.3963588  | 0.378 | 0.213 | 1.91E-11 | 5 |
| Ikkkb.1   | 2.20E-17 | 0.39574184 | 0.274 | 0.13  | 3.63E-13 | 5 |
| H2afj     | 1.13E-14 | 0.39368748 | 0.542 | 0.366 | 1.87E-10 | 5 |
| Atp6v0c.4 | 1.82E-16 | 0.39136711 | 0.6   | 0.413 | 2.99E-12 | 5 |
| Add3      | 8.35E-16 | 0.38771931 | 0.299 | 0.153 | 1.37E-11 | 5 |
| Esd       | 3.01E-16 | 0.38255672 | 0.342 | 0.184 | 4.95E-12 | 5 |
| Gnb2.1    | 4.64E-15 | 0.37936282 | 0.602 | 0.417 | 7.63E-11 | 5 |
| Fosl2.1   | 7.12E-15 | 0.3777536  | 0.362 | 0.206 | 1.17E-10 | 5 |
| Mia2      | 6.66E-15 | 0.37401667 | 0.279 | 0.141 | 1.10E-10 | 5 |
| Fermt3    | 3.46E-12 | 0.37216501 | 0.303 | 0.172 | 5.70E-08 | 5 |
| Scand1    | 6.65E-19 | 0.37065989 | 0.539 | 0.324 | 1.09E-14 | 5 |
| Anxa5.4   | 1.81E-18 | 0.36867516 | 0.539 | 0.331 | 2.98E-14 | 5 |
| Actr3.2   | 6.23E-15 | 0.36694871 | 0.69  | 0.515 | 1.03E-10 | 5 |

|           |          |            |       |       |            |   |
|-----------|----------|------------|-------|-------|------------|---|
| Slc25a5   | 2.55E-18 | 0.36632132 | 0.521 | 0.317 | 4.20E-14   | 5 |
| Arhgap9   | 1.32E-15 | 0.36623567 | 0.254 | 0.12  | 2.17E-11   | 5 |
| Arpc4.1   | 3.87E-16 | 0.36539648 | 0.526 | 0.332 | 6.37E-12   | 5 |
| Gpr132.3  | 5.88E-14 | 0.3650835  | 0.373 | 0.215 | 9.67E-10   | 5 |
| Laptm5    | 3.59E-23 | 0.36438185 | 0.858 | 0.642 | 5.90E-19   | 5 |
| Pim1.3    | 1.17E-18 | 0.36410432 | 0.652 | 0.437 | 1.93E-14   | 5 |
| Dynll1    | 1.53E-15 | 0.36061594 | 0.483 | 0.298 | 2.51E-11   | 5 |
| Hcls1     | 8.50E-14 | 0.35722069 | 0.389 | 0.229 | 1.40E-09   | 5 |
| Diaph1    | 1.20E-12 | 0.35427996 | 0.31  | 0.173 | 1.97E-08   | 5 |
| Snrpb     | 1.60E-13 | 0.35375911 | 0.436 | 0.268 | 2.63E-09   | 5 |
| Pgam1     | 2.96E-13 | 0.35300853 | 0.283 | 0.151 | 4.87E-09   | 5 |
| Cycs.2    | 6.60E-11 | 0.3518684  | 0.378 | 0.238 | 1.09E-06   | 5 |
| Vsir.1    | 1.33E-16 | 0.34780724 | 0.308 | 0.152 | 2.19E-12   | 5 |
| Ywhab     | 4.53E-10 | 0.34631148 | 0.353 | 0.224 | 7.45E-06   | 5 |
| Tmed5     | 1.86E-13 | 0.3442181  | 0.303 | 0.165 | 3.05E-09   | 5 |
| Cdc42     | 1.42E-14 | 0.34144968 | 0.692 | 0.529 | 2.34E-10   | 5 |
| Pid1.2    | 4.34E-13 | 0.33835635 | 0.261 | 0.133 | 7.14E-09   | 5 |
| Atp1b3.1  | 5.02E-14 | 0.33693123 | 0.346 | 0.193 | 8.26E-10   | 5 |
| B2m.1     | 7.25E-22 | 0.33197948 | 0.935 | 0.8   | 1.19E-17   | 5 |
| Zbtb7a    | 4.38E-11 | 0.33021349 | 0.281 | 0.157 | 7.20E-07   | 5 |
| Xbp1      | 6.51E-17 | 0.32781187 | 0.326 | 0.164 | 1.07E-12   | 5 |
| Asap1     | 1.72E-15 | 0.32764583 | 0.265 | 0.128 | 2.83E-11   | 5 |
| Gapdh.3   | 3.01E-19 | 0.32729831 | 0.856 | 0.705 | 4.95E-15   | 5 |
| H2-Eb1.6  | 2.42E-55 | 0.59573926 | 0.993 | 0.697 | 3.98E-51   | 9 |
| Prdx1.3   | 4.84E-12 | 0.32487855 | 0.542 | 0.37  | 7.97E-08   | 5 |
| Uqcrrf1   | 6.12E-10 | 0.32355129 | 0.357 | 0.23  | 1.01E-05   | 5 |
| Aldh2.2   | 5.41E-16 | 0.32281545 | 0.369 | 0.197 | 8.90E-12   | 5 |
| Arl6ip5.1 | 2.43E-13 | 0.32274156 | 0.297 | 0.159 | 4.00E-09   | 5 |
| Emb.1     | 9.55E-16 | 0.32073673 | 0.36  | 0.194 | 1.57E-11   | 5 |
| Mpc2      | 6.90E-10 | 0.31980338 | 0.319 | 0.196 | 1.14E-05   | 5 |
| Vamp8.4   | 3.43E-11 | 0.31583763 | 0.497 | 0.333 | 5.64E-07   | 5 |
| Tmsb10.4  | 4.56E-23 | 0.31505424 | 0.948 | 0.776 | 7.50E-19   | 5 |
| Plec.1    | 6.08E-10 | 0.31466639 | 0.281 | 0.163 | 9.99E-06   | 5 |
| Ssh2      | 1.90E-08 | 0.31299796 | 0.258 | 0.156 | 0.00031251 | 5 |
| Atp5c1.2  | 2.50E-11 | 0.31299525 | 0.492 | 0.334 | 4.11E-07   | 5 |
| Fcgr3.3   | 8.65E-14 | 0.30903562 | 0.384 | 0.217 | 1.42E-09   | 5 |
| Btg1.4    | 5.04E-19 | 0.30850687 | 0.782 | 0.56  | 8.29E-15   | 5 |
| Nrros.5   | 1.14E-13 | 0.30739284 | 0.452 | 0.274 | 1.88E-09   | 5 |
| Clic1.1   | 4.57E-13 | 0.30629646 | 0.665 | 0.494 | 7.53E-09   | 5 |
| Efhd2.3   | 1.09E-09 | 0.30458765 | 0.429 | 0.288 | 1.79E-05   | 5 |
| Atp6v0d1  | 1.28E-13 | 0.30437869 | 0.279 | 0.144 | 2.11E-09   | 5 |
| Cap1      | 2.20E-09 | 0.3016483  | 0.33  | 0.203 | 3.62E-05   | 5 |
| Aif1.1    | 6.74E-10 | 0.30142605 | 0.319 | 0.193 | 1.11E-05   | 5 |

|            |          |            |       |       |            |   |
|------------|----------|------------|-------|-------|------------|---|
| Psmb5      | 6.44E-10 | 0.30037381 | 0.324 | 0.199 | 1.06E-05   | 5 |
| Ly6e.3     | 2.69E-21 | 0.30022351 | 0.903 | 0.741 | 4.42E-17   | 5 |
| Chmp2a     | 9.44E-11 | 0.29969639 | 0.306 | 0.18  | 1.55E-06   | 5 |
| Capns1.1   | 1.24E-10 | 0.29871681 | 0.378 | 0.235 | 2.04E-06   | 5 |
| Pycard     | 7.94E-10 | 0.29862672 | 0.321 | 0.198 | 1.31E-05   | 5 |
| Trib1.3    | 5.62E-12 | 0.29681778 | 0.364 | 0.219 | 9.24E-08   | 5 |
| Syk.1      | 6.94E-11 | 0.29613821 | 0.342 | 0.204 | 1.14E-06   | 5 |
| Bax        | 4.52E-09 | 0.2956102  | 0.337 | 0.217 | 7.44E-05   | 5 |
| Cotl1.2    | 1.33E-10 | 0.29462175 | 0.508 | 0.353 | 2.19E-06   | 5 |
| D8Ertd738e | 5.27E-09 | 0.29116978 | 0.506 | 0.371 | 8.67E-05   | 5 |
| Arhgap30   | 1.05E-11 | 0.29112799 | 0.317 | 0.18  | 1.73E-07   | 5 |
| H13.1      | 7.24E-10 | 0.2910284  | 0.294 | 0.176 | 1.19E-05   | 5 |
| Fam174a    | 8.85E-08 | 0.29102228 | 0.256 | 0.157 | 0.0014565  | 5 |
| Ndufa11    | 8.95E-12 | 0.28959614 | 0.346 | 0.203 | 1.47E-07   | 5 |
| Ywhaz.2    | 2.74E-09 | 0.288727   | 0.649 | 0.522 | 4.51E-05   | 5 |
| Sec61g     | 9.84E-11 | 0.28507312 | 0.49  | 0.337 | 1.62E-06   | 5 |
| Litaf.2    | 4.12E-10 | 0.28406452 | 0.396 | 0.256 | 6.78E-06   | 5 |
| Slfn2.1    | 3.44E-11 | 0.28364763 | 0.353 | 0.21  | 5.67E-07   | 5 |
| Hspa8.1    | 3.59E-10 | 0.28235711 | 0.791 | 0.721 | 5.91E-06   | 5 |
| Ifnar2.1   | 6.78E-11 | 0.28134937 | 0.315 | 0.183 | 1.11E-06   | 5 |
| Arpc5      | 1.94E-09 | 0.2804139  | 0.515 | 0.371 | 3.18E-05   | 5 |
| Tspo.1     | 7.85E-11 | 0.28023359 | 0.582 | 0.414 | 1.29E-06   | 5 |
| Atp2b1.5   | 3.75E-10 | 0.28003669 | 0.49  | 0.338 | 6.17E-06   | 5 |
| Pde4b.5    | 1.92E-10 | 0.2799867  | 0.578 | 0.408 | 3.16E-06   | 5 |
| S100a11.4  | 1.68E-05 | 0.27762875 | 0.526 | 0.391 | 0.27655503 | 5 |
| Atp5l      | 4.37E-11 | 0.27602747 | 0.658 | 0.507 | 7.19E-07   | 5 |
| H2afz.4    | 3.73E-16 | 0.27533475 | 0.762 | 0.577 | 6.14E-12   | 5 |
| Abracl.3   | 5.50E-12 | 0.27465066 | 0.409 | 0.252 | 9.05E-08   | 5 |
| Erp29.3    | 1.01E-09 | 0.27241227 | 0.512 | 0.358 | 1.66E-05   | 5 |
| Csf1r.5    | 6.35E-31 | 0.27077296 | 0.654 | 0.314 | 1.04E-26   | 5 |
| Grk2       | 1.38E-08 | 0.27046422 | 0.283 | 0.173 | 0.00022627 | 5 |
| Reep5      | 9.61E-12 | 0.27012237 | 0.521 | 0.344 | 1.58E-07   | 5 |
| Gnai2.4    | 1.09E-10 | 0.26899389 | 0.692 | 0.518 | 1.80E-06   | 5 |
| Eif3k.3    | 4.18E-10 | 0.26739085 | 0.589 | 0.434 | 6.87E-06   | 5 |
| Ndufc2.1   | 3.59E-06 | 0.26724858 | 0.312 | 0.219 | 0.05911577 | 5 |
| Was        | 1.23E-09 | 0.26637636 | 0.256 | 0.145 | 2.03E-05   | 5 |
| Rbms1.4    | 9.96E-12 | 0.26407846 | 0.409 | 0.248 | 1.64E-07   | 5 |
| Atp6v0b.4  | 4.97E-13 | 0.26379441 | 0.539 | 0.349 | 8.18E-09   | 5 |
| Arf5.2     | 8.89E-10 | 0.26236313 | 0.555 | 0.403 | 1.46E-05   | 5 |
| Serf2.3    | 6.60E-16 | 0.26224896 | 0.872 | 0.755 | 1.09E-11   | 5 |
| Dazap2     | 1.14E-08 | 0.26203144 | 0.449 | 0.313 | 0.00018703 | 5 |
| Stk24      | 1.01E-06 | 0.26012271 | 0.254 | 0.161 | 0.01657058 | 5 |
| Ypel3.3    | 1.51E-06 | 0.2599118  | 0.418 | 0.299 | 0.02490118 | 5 |

|            |            |            |       |       |            |    |
|------------|------------|------------|-------|-------|------------|----|
| Psmb2      | 1.22E-08   | 0.25970635 | 0.299 | 0.185 | 0.00019986 | 5  |
| Txn1.1     | 0.0008326  | 0.25837164 | 0.321 | 0.247 | 1          | 5  |
| Psm2       | 2.19E-09   | 0.25802413 | 0.351 | 0.22  | 3.59E-05   | 5  |
| Cope       | 2.23E-09   | 0.25802218 | 0.308 | 0.185 | 3.67E-05   | 5  |
| Tspan13    | 4.21E-09   | 0.25775113 | 0.27  | 0.158 | 6.93E-05   | 5  |
| Mob1a      | 1.55E-08   | 0.25701108 | 0.258 | 0.155 | 0.00025534 | 5  |
| Tmbim6     | 7.87E-09   | 0.25492928 | 0.56  | 0.418 | 0.00012945 | 5  |
| Prdx2      | 3.82E-08   | 0.25329629 | 0.333 | 0.218 | 0.00062774 | 5  |
| Atp5f1     | 5.06E-08   | 0.2514506  | 0.472 | 0.333 | 0.00083261 | 5  |
| H2-K1.7    | 1.31E-42   | 0.59401041 | 0.952 | 0.839 | 2.16E-38   | 10 |
| Cnbp.4     | 0.00657421 | -0.2591875 | 0.402 | 0.431 | 1          | 5  |
| Rps4x.5    | 2.08E-15   | -0.2592502 | 0.948 | 0.964 | 3.42E-11   | 5  |
| Rpl32.3    | 4.49E-13   | -0.2628852 | 0.928 | 0.95  | 7.39E-09   | 5  |
| Cd74.5     | 2.95E-11   | -0.2642533 | 0.771 | 0.83  | 4.85E-07   | 5  |
| Hnrnpa1.2  | 0.00184923 | -0.2678356 | 0.254 | 0.305 | 1          | 5  |
| Rpsa.4     | 8.71E-09   | -0.2686482 | 0.944 | 0.934 | 0.00014331 | 5  |
| Tbca       | 0.00092328 | -0.2701412 | 0.22  | 0.283 | 1          | 5  |
| Rpl36.4    | 5.74E-12   | -0.2733886 | 0.865 | 0.902 | 9.45E-08   | 5  |
| Clic4.5    | 0.00261851 | -0.2740404 | 0.2   | 0.255 | 1          | 5  |
| Nol7.2     | 0.00108153 | -0.2798288 | 0.216 | 0.273 | 1          | 5  |
| Hmgb1.1    | 0.00037376 | -0.2832287 | 0.369 | 0.422 | 1          | 5  |
| Rps2.3     | 5.54E-14   | -0.2870836 | 0.921 | 0.945 | 9.11E-10   | 5  |
| Rps6.4     | 1.42E-08   | -0.2888167 | 0.755 | 0.772 | 0.00023301 | 5  |
| Jak1.2     | 0.00402927 | -0.2908409 | 0.279 | 0.322 | 1          | 5  |
| H2-T22.2   | 3.32E-06   | 0.59032247 | 0.32  | 0.157 | 0.05458064 | 15 |
| Mif.3      | 0.0036864  | -0.3000179 | 0.202 | 0.251 | 1          | 5  |
| mt-Co2     | 2.13E-28   | -0.3038808 | 0.939 | 0.974 | 3.50E-24   | 5  |
| Mbnl1.1    | 0.00231319 | -0.3082039 | 0.299 | 0.342 | 1          | 5  |
| AY036118.2 | 0.0086107  | -0.3098444 | 0.784 | 0.784 | 1          | 5  |
| Rpl22l1.3  | 0.00031019 | -0.3106764 | 0.409 | 0.444 | 1          | 5  |
| Rpl30.2    | 3.65E-19   | -0.3128513 | 0.917 | 0.955 | 6.01E-15   | 5  |
| Gm8186.1   | 0.00074217 | -0.3137113 | 0.202 | 0.261 | 1          | 5  |
| S100a10.4  | 1.81E-05   | -0.3242669 | 0.396 | 0.464 | 0.29743905 | 5  |
| Rps18.4    | 2.19E-12   | -0.3278111 | 0.845 | 0.872 | 3.60E-08   | 5  |
| Pnrc1.2    | 5.04E-07   | -0.3284698 | 0.427 | 0.522 | 0.008293   | 5  |
| Rps27.4    | 6.16E-12   | -0.3312819 | 0.91  | 0.901 | 1.01E-07   | 5  |
| Rpl39.4    | 1.07E-15   | -0.3346088 | 0.883 | 0.89  | 1.76E-11   | 5  |
| Rps29.1    | 2.41E-19   | -0.3368255 | 0.867 | 0.896 | 3.96E-15   | 5  |
| Ncl.3      | 8.82E-05   | -0.3402936 | 0.312 | 0.378 | 1          | 5  |
| mt-Atp6.1  | 2.88E-15   | -0.3408289 | 0.748 | 0.8   | 4.74E-11   | 5  |
| Npm1.3     | 2.05E-06   | -0.3423922 | 0.474 | 0.534 | 0.03373968 | 5  |
| Rpl14.4    | 6.84E-12   | -0.3428212 | 0.784 | 0.787 | 1.13E-07   | 5  |
| mt-Nd4.3   | 1.61E-10   | -0.3473697 | 0.638 | 0.706 | 2.65E-06   | 5  |

|            |            |            |       |       |            |   |
|------------|------------|------------|-------|-------|------------|---|
| Eef1d.2    | 2.62E-05   | -0.3487082 | 0.353 | 0.415 | 0.43055714 | 5 |
| Klf2.4     | 0.00320997 | -0.3507887 | 0.598 | 0.594 | 1          | 5 |
| H2-K1.4    | 1.97E-53   | 0.5746849  | 0.934 | 0.838 | 3.24E-49   | 7 |
| Junb.3     | 1.91E-10   | -0.3580559 | 0.834 | 0.843 | 3.15E-06   | 5 |
| Rps24.4    | 3.44E-27   | -0.3580921 | 0.975 | 0.988 | 5.65E-23   | 5 |
| Rps12.1    | 2.56E-27   | -0.3602324 | 0.915 | 0.939 | 4.22E-23   | 5 |
| Cltc.5     | 0.00053102 | -0.3634244 | 0.281 | 0.334 | 1          | 5 |
| Ctsd.5     | 0.00333803 | -0.3637666 | 0.252 | 0.293 | 1          | 5 |
| Wnk1.1     | 2.11E-05   | -0.3675027 | 0.184 | 0.264 | 0.34762218 | 5 |
| Rps15a.4   | 3.71E-21   | -0.3744172 | 0.93  | 0.952 | 6.10E-17   | 5 |
| Atpif1.4   | 5.80E-06   | -0.3746325 | 0.234 | 0.32  | 0.09542721 | 5 |
| Ppp1r15a.4 | 3.64E-06   | -0.3773244 | 0.276 | 0.361 | 0.05985965 | 5 |
| Foxp1.2    | 0.00061645 | -0.3776129 | 0.213 | 0.269 | 1          | 5 |
| Serinc3.5  | 0.00069694 | -0.3865512 | 0.312 | 0.36  | 1          | 5 |
| mt-Nd3     | 8.30E-07   | -0.3941392 | 0.231 | 0.328 | 0.01365747 | 5 |
| mt-Co3.1   | 1.59E-41   | -0.3971654 | 0.942 | 0.977 | 2.61E-37   | 5 |
| mt-Nd4l.3  | 2.74E-24   | -0.3982466 | 0.865 | 0.903 | 4.50E-20   | 5 |
| Socs3.5    | 6.78E-05   | -0.4033678 | 0.211 | 0.283 | 1          | 5 |
| Snx5.5     | 2.80E-05   | -0.4115621 | 0.249 | 0.321 | 0.46004336 | 5 |
| Rps21.3    | 1.43E-25   | -0.4121121 | 0.825 | 0.886 | 2.36E-21   | 5 |
| Rpl13a.4   | 4.46E-16   | -0.4173367 | 0.775 | 0.815 | 7.34E-12   | 5 |
| Eef1g.2    | 3.67E-08   | -0.4185199 | 0.276 | 0.382 | 0.00060352 | 5 |
| Il2rg.4    | 0.00151918 | -0.4235718 | 0.243 | 0.287 | 1          | 5 |
| Ndfip1.1   | 2.03E-06   | -0.4236376 | 0.211 | 0.302 | 0.03339166 | 5 |
| mt-Co1.2   | 1.97E-54   | -0.4263527 | 0.971 | 0.99  | 3.24E-50   | 5 |
| mt-Atp8.3  | 5.42E-34   | -0.4308921 | 0.888 | 0.932 | 8.92E-30   | 5 |
| Ier2.4     | 7.84E-05   | -0.4311181 | 0.533 | 0.557 | 1          | 5 |
| Cxcl2.5    | 0.00297528 | -0.4382446 | 0.207 | 0.253 | 1          | 5 |
| Xist.1     | 7.08E-10   | -0.4435338 | 0.369 | 0.481 | 1.17E-05   | 5 |
| Rpl36a.4   | 4.61E-20   | -0.4490031 | 0.683 | 0.765 | 7.59E-16   | 5 |
| Rps20.4    | 3.94E-38   | -0.4513946 | 0.944 | 0.974 | 6.48E-34   | 5 |
| mt-Nd1.1   | 5.58E-34   | -0.4556455 | 0.782 | 0.874 | 9.19E-30   | 5 |
| Ptms.3     | 1.67E-06   | -0.4713581 | 0.204 | 0.293 | 0.0274522  | 5 |
| mt-Cytb.1  | 6.19E-41   | -0.4770631 | 0.874 | 0.941 | 1.02E-36   | 5 |
| mt-Nd2.2   | 3.56E-25   | -0.4774629 | 0.676 | 0.805 | 5.86E-21   | 5 |
| Atf3.4     | 0.00045923 | -0.494739  | 0.499 | 0.507 | 1          | 5 |
| mt-Nd5.2   | 1.18E-17   | -0.5034925 | 0.546 | 0.667 | 1.94E-13   | 5 |
| Kctd12.4   | 5.42E-06   | -0.5057518 | 0.306 | 0.375 | 0.08910182 | 5 |
| Lgals1.3   | 1.07E-05   | -0.5097757 | 0.344 | 0.406 | 0.175518   | 5 |
| Cfp.4      | 9.07E-06   | -0.5175925 | 0.24  | 0.316 | 0.14911718 | 5 |
| Apoe.5     | 1.26E-10   | -0.5327941 | 0.793 | 0.451 | 2.07E-06   | 5 |
| Cd83.3     | 1.40E-09   | -0.5366676 | 0.378 | 0.476 | 2.31E-05   | 5 |
| Tuba1b.1   | 5.69E-07   | -0.5394349 | 0.236 | 0.325 | 0.00936257 | 5 |



|               |            |            |       |       |            |    |
|---------------|------------|------------|-------|-------|------------|----|
| Gadd45b.4     | 1.49E-10   | -0.5780276 | 0.128 | 0.258 | 2.45E-06   | 5  |
| Pltp.5        | 0.00012171 | -0.5997755 | 0.292 | 0.34  | 1          | 5  |
| Zfp36l1.4     | 1.41E-22   | -0.6775381 | 0.335 | 0.539 | 2.32E-18   | 5  |
| Rplp1.1       | 6.29E-95   | -0.6817406 | 0.924 | 0.976 | 1.03E-90   | 5  |
| Tubb5.2       | 2.13E-14   | -0.7048167 | 0.148 | 0.305 | 3.51E-10   | 5  |
| Rpl12.4       | 5.22E-37   | -0.7076119 | 0.62  | 0.77  | 8.59E-33   | 5  |
| H2-Oa.5       | 1.09E-16   | 0.56551159 | 0.574 | 0.141 | 1.79E-12   | 17 |
| Tnfaip3.4     | 1.84E-15   | -0.7425341 | 0.173 | 0.338 | 3.03E-11   | 5  |
| Cd37.4        | 8.07E-13   | -0.7501322 | 0.198 | 0.337 | 1.33E-08   | 5  |
| Fcgrt.4       | 2.80E-10   | -0.802228  | 0.146 | 0.263 | 4.61E-06   | 5  |
| Txnip.3       | 2.74E-16   | -0.8120062 | 0.085 | 0.251 | 4.50E-12   | 5  |
| Nfkbiz.4      | 4.44E-16   | -0.8374792 | 0.299 | 0.449 | 7.31E-12   | 5  |
| AW112010.5    | 2.79E-06   | -0.8717941 | 0.182 | 0.266 | 0.04597272 | 5  |
| Clec10a.5     | 6.66E-14   | -0.9004687 | 0.106 | 0.254 | 1.10E-09   | 5  |
| Klf6.5        | 3.23E-20   | -0.9026201 | 0.387 | 0.539 | 5.31E-16   | 5  |
| Jund.4        | 3.38E-37   | -0.9193135 | 0.506 | 0.693 | 5.56E-33   | 5  |
| Fosb.4        | 1.15E-21   | -0.9210249 | 0.337 | 0.512 | 1.89E-17   | 5  |
| Ly6d.4        | 1.11E-11   | -1.0033194 | 0.189 | 0.315 | 1.82E-07   | 5  |
| Cd81.5        | 4.72E-29   | -1.0134257 | 0.054 | 0.299 | 7.77E-25   | 5  |
| H2-Q6         | 1.74E-35   | 0.55653031 | 0.32  | 0.142 | 2.86E-31   | 4  |
| Mgl2.5        | 5.09E-23   | -1.092084  | 0.052 | 0.257 | 8.37E-19   | 5  |
| Marcksl1.4    | 1.44E-23   | -1.1108013 | 0.245 | 0.446 | 2.37E-19   | 5  |
| Ptprcap.5     | 4.58E-26   | -1.1812853 | 0.056 | 0.278 | 7.54E-22   | 5  |
| Mrc1.5        | 3.72E-25   | -1.2141185 | 0.092 | 0.318 | 6.11E-21   | 5  |
| Ighm.3        | 7.12E-09   | -1.2307669 | 0.328 | 0.42  | 0.00011708 | 5  |
| Selenop.5     | 0.00039187 | -1.2620772 | 0.452 | 0.414 | 1          | 5  |
| Jun.5         | 1.32E-22   | -1.271612  | 0.276 | 0.473 | 2.18E-18   | 5  |
| Cbr2.5        | 2.74E-22   | -1.3574425 | 0.058 | 0.254 | 4.51E-18   | 5  |
| Ccl2.5        | 1.88E-15   | -1.3805883 | 0.133 | 0.29  | 3.10E-11   | 5  |
| C1qb.5        | 4.42E-23   | -1.426987  | 0.16  | 0.364 | 7.27E-19   | 5  |
| Egr1.4        | 2.01E-38   | -1.4436427 | 0.175 | 0.475 | 3.31E-34   | 5  |
| C1qa.5        | 9.16E-27   | -1.6246373 | 0.115 | 0.343 | 1.51E-22   | 5  |
| Mt1.5         | 2.67E-33   | -1.6904893 | 0.173 | 0.43  | 4.39E-29   | 5  |
| Cd79a.5       | 4.34E-22   | -1.7049604 | 0.067 | 0.262 | 7.14E-18   | 5  |
| C1qc.5        | 1.49E-28   | -1.7824048 | 0.112 | 0.347 | 2.46E-24   | 5  |
| Pf4.5         | 3.47E-35   | -2.2811858 | 0.049 | 0.322 | 5.70E-31   | 5  |
| Retnla.3      | 2.74E-15   | -2.6108645 | 0.097 | 0.251 | 4.50E-11   | 5  |
| AC133103.1    | 0          | 1.82934118 | 0.529 | 0.018 | 0          | 6  |
| Ighv1-52      | 0          | 1.55174492 | 0.449 | 0.018 | 0          | 6  |
| Mzb1          | 1.84E-307  | 1.60889751 | 0.684 | 0.081 | 3.02E-303  | 6  |
| Fcrl5         | 3.19E-307  | 1.19855821 | 0.328 | 0.012 | 5.24E-303  | 6  |
| C130026l21Ril | 2.98E-260  | 1.19081899 | 0.336 | 0.018 | 4.90E-256  | 6  |
| Ms4a1.1       | 8.99E-258  | 1.50570949 | 0.709 | 0.107 | 1.48E-253  | 6  |

|             |           |            |       |       |           |    |
|-------------|-----------|------------|-------|-------|-----------|----|
| Cd79a.6     | 3.03E-223 | 1.3501431  | 0.927 | 0.215 | 4.99E-219 | 6  |
| Igkv1-117.1 | 3.31E-207 | 1.39819449 | 0.737 | 0.175 | 5.45E-203 | 6  |
| Iglc2.1     | 1.19E-190 | 1.38761236 | 0.614 | 0.105 | 1.96E-186 | 6  |
| Cd79b.1     | 1.24E-161 | 1.20911197 | 0.719 | 0.17  | 2.04E-157 | 6  |
| Fcmr.1      | 1.41E-150 | 1.11927532 | 0.549 | 0.1   | 2.31E-146 | 6  |
| Iglc3.1     | 3.02E-146 | 1.18464721 | 0.521 | 0.095 | 4.96E-142 | 6  |
| Plac8.1     | 1.05E-145 | 1.15447416 | 0.634 | 0.143 | 1.73E-141 | 6  |
| Ighm.4      | 3.49E-145 | 0.72001482 | 0.89  | 0.389 | 5.74E-141 | 6  |
| Myo1e       | 5.74E-143 | 1.14198702 | 0.391 | 0.055 | 9.44E-139 | 6  |
| A530040E14R | 3.31E-140 | 1.05092728 | 0.311 | 0.034 | 5.44E-136 | 6  |
| Nfatc1      | 2.21E-134 | 1.25223997 | 0.521 | 0.11  | 3.63E-130 | 6  |
| Ly6a.1      | 9.25E-129 | 1.27239654 | 0.612 | 0.152 | 1.52E-124 | 6  |
| Ly6d.5      | 4.06E-128 | 1.159419   | 0.807 | 0.281 | 6.67E-124 | 6  |
| Camk2d      | 2.99E-126 | 1.10468419 | 0.511 | 0.108 | 4.92E-122 | 6  |
| Blk         | 3.70E-118 | 0.93751031 | 0.308 | 0.04  | 6.09E-114 | 6  |
| Spib        | 1.46E-114 | 0.92478336 | 0.263 | 0.03  | 2.40E-110 | 6  |
| Sp140.1     | 1.27E-113 | 1.17702956 | 0.561 | 0.149 | 2.09E-109 | 6  |
| Cd19.1      | 1.31E-111 | 0.94359535 | 0.358 | 0.057 | 2.15E-107 | 6  |
| Cd24a       | 6.03E-110 | 1.28632944 | 0.491 | 0.117 | 9.92E-106 | 6  |
| Iglc1       | 8.17E-110 | 0.91724017 | 0.266 | 0.032 | 1.34E-105 | 6  |
| Ebf1.1      | 3.19E-97  | 0.82087388 | 0.524 | 0.125 | 5.24E-93  | 6  |
| Napsa.6     | 2.07E-89  | 1.0143051  | 0.667 | 0.243 | 3.41E-85  | 6  |
| Tyrobp.6    | 2.65E-89  | -2.3371518 | 0.123 | 0.634 | 4.36E-85  | 6  |
| Fam43a      | 2.24E-88  | 1.13376874 | 0.386 | 0.083 | 3.69E-84  | 6  |
| Odc1.1      | 1.67E-87  | 1.18826274 | 0.544 | 0.172 | 2.75E-83  | 6  |
| Fcer1g.5    | 4.15E-85  | -2.2201211 | 0.073 | 0.604 | 6.83E-81  | 6  |
| Cst3.5      | 3.76E-83  | -2.4988448 | 0.331 | 0.704 | 6.18E-79  | 6  |
| Cd37.5      | 8.50E-83  | 0.96176784 | 0.727 | 0.308 | 1.40E-78  | 6  |
| Cxcr5       | 5.19E-82  | 0.8106669  | 0.261 | 0.04  | 8.53E-78  | 6  |
| H2-Q7.9     | 1.10E-14  | 0.55210408 | 0.484 | 0.249 | 1.81E-10  | 12 |
| Zbtb20      | 2.04E-81  | 0.97228408 | 0.456 | 0.123 | 3.35E-77  | 6  |
| Bank1.1     | 2.13E-81  | 0.8895982  | 0.511 | 0.144 | 3.51E-77  | 6  |
| Lyz2.6      | 1.13E-77  | -3.1071387 | 0.09  | 0.579 | 1.85E-73  | 6  |
| Vars        | 6.87E-73  | 0.90484847 | 0.411 | 0.109 | 1.13E-68  | 6  |
| Snn         | 8.09E-71  | 0.70838217 | 0.276 | 0.051 | 1.33E-66  | 6  |
| Dok3        | 9.48E-71  | 0.84428886 | 0.336 | 0.076 | 1.56E-66  | 6  |
| Ifitm3.6    | 1.59E-69  | -2.3031332 | 0.04  | 0.515 | 2.61E-65  | 6  |
| Dnajc7      | 3.23E-67  | 0.98354753 | 0.441 | 0.136 | 5.31E-63  | 6  |
| Gm15987     | 4.90E-67  | 0.81569785 | 0.278 | 0.057 | 8.06E-63  | 6  |
| Igkc.1      | 4.14E-66  | 0.31671424 | 0.501 | 0.156 | 6.80E-62  | 6  |
| Fth1.4      | 1.16E-65  | -0.9371893 | 0.917 | 0.96  | 1.91E-61  | 6  |
| Ctla4       | 1.29E-63  | 0.80287259 | 0.256 | 0.05  | 2.12E-59  | 6  |
| Zfp36.4     | 3.75E-62  | -1.6231366 | 0.246 | 0.631 | 6.16E-58  | 6  |

|            |          |            |       |       |          |   |
|------------|----------|------------|-------|-------|----------|---|
| Ero1lb     | 1.43E-61 | 0.87952888 | 0.303 | 0.072 | 2.36E-57 | 6 |
| Uchl3      | 1.79E-60 | 0.82881564 | 0.313 | 0.077 | 2.95E-56 | 6 |
| Ftl1.5     | 2.69E-59 | -1.2513748 | 0.82  | 0.894 | 4.42E-55 | 6 |
| Ltb.3      | 1.71E-57 | 0.75742871 | 0.534 | 0.189 | 2.81E-53 | 6 |
| Fos.4      | 4.15E-56 | -1.7285013 | 0.291 | 0.638 | 6.83E-52 | 6 |
| Tmem176b.4 | 9.46E-56 | -1.7799238 | 0.048 | 0.46  | 1.56E-51 | 6 |
| Rpl13.4    | 3.38E-55 | 0.39035649 | 0.997 | 0.981 | 5.56E-51 | 6 |
| Ccl6.6     | 7.99E-55 | -2.1754807 | 0.028 | 0.433 | 1.31E-50 | 6 |
| Alox5ap.6  | 1.21E-54 | -1.7791434 | 0.013 | 0.418 | 1.98E-50 | 6 |
| Cd72       | 1.27E-54 | 0.81351912 | 0.301 | 0.076 | 2.08E-50 | 6 |
| Sh3bp5     | 2.50E-54 | 0.71864047 | 0.316 | 0.081 | 4.11E-50 | 6 |
| Txnip.4    | 8.79E-54 | 0.84252008 | 0.554 | 0.225 | 1.45E-49 | 6 |
| Dusp1.4    | 3.31E-53 | -1.4333528 | 0.258 | 0.624 | 5.45E-49 | 6 |
| Ptprcap.6  | 1.59E-52 | 0.65195142 | 0.612 | 0.247 | 2.62E-48 | 6 |
| Rpsa.5     | 3.32E-52 | 0.44529532 | 0.99  | 0.932 | 5.47E-48 | 6 |
| Mt1.6      | 4.91E-52 | -2.3617234 | 0.045 | 0.436 | 8.08E-48 | 6 |
| Ifitm2.6   | 5.35E-52 | -1.8279239 | 0.02  | 0.41  | 8.79E-48 | 6 |
| mt-Cytb.2  | 6.59E-51 | 0.45494226 | 0.987 | 0.934 | 1.08E-46 | 6 |
| Itm2b.5    | 7.72E-51 | -1.1125985 | 0.594 | 0.798 | 1.27E-46 | 6 |
| Siglecg    | 6.03E-50 | 0.67479307 | 0.261 | 0.062 | 9.91E-46 | 6 |
| Tmsb4x.4   | 7.02E-50 | -0.5227399 | 0.997 | 0.993 | 1.15E-45 | 6 |
| Selenop.6  | 1.85E-48 | -2.4471182 | 0.063 | 0.435 | 3.05E-44 | 6 |
| Nfkbiz.5   | 2.48E-48 | -1.742773  | 0.093 | 0.459 | 4.08E-44 | 6 |
| Rps18.5    | 3.70E-48 | 0.46892009 | 0.965 | 0.865 | 6.09E-44 | 6 |
| Ezr.4      | 4.24E-48 | 0.77772235 | 0.521 | 0.221 | 6.97E-44 | 6 |
| mt-Co3.2   | 9.38E-48 | 0.35648561 | 0.992 | 0.974 | 1.54E-43 | 6 |
| Gimap5     | 3.98E-47 | 0.61865497 | 0.288 | 0.076 | 6.55E-43 | 6 |
| Rac2.5     | 5.35E-47 | 0.60392213 | 0.784 | 0.465 | 8.80E-43 | 6 |
| Ctsb.5     | 2.71E-46 | -1.7678907 | 0.143 | 0.494 | 4.46E-42 | 6 |
| Tnfrsf13b  | 3.26E-45 | 0.74599256 | 0.296 | 0.085 | 5.36E-41 | 6 |
| Rps19.4    | 4.00E-44 | 0.42908655 | 0.975 | 0.931 | 6.58E-40 | 6 |
| C1qb.6     | 4.43E-44 | -2.7601313 | 0.025 | 0.37  | 7.28E-40 | 6 |
| Swap70.1   | 8.69E-44 | 0.71065691 | 0.373 | 0.127 | 1.43E-39 | 6 |
| Csf1r.6    | 1.21E-43 | -1.8813658 | 0.008 | 0.35  | 1.99E-39 | 6 |
| Pdia4      | 1.87E-43 | 0.68215284 | 0.386 | 0.135 | 3.08E-39 | 6 |
| Gpx1.6     | 3.12E-43 | -1.1063212 | 0.546 | 0.721 | 5.13E-39 | 6 |
| mt-Nd4l.4  | 5.01E-43 | 0.41845272 | 0.975 | 0.897 | 8.25E-39 | 6 |
| Egr1.5     | 8.75E-43 | -1.7295205 | 0.133 | 0.475 | 1.44E-38 | 6 |
| Rpl8.4     | 8.79E-43 | 0.38742794 | 0.982 | 0.913 | 1.45E-38 | 6 |
| Gimap4.1   | 2.17E-42 | 0.60541373 | 0.406 | 0.143 | 3.57E-38 | 6 |
| Junb.4     | 2.24E-42 | -0.6984782 | 0.682 | 0.851 | 3.68E-38 | 6 |
| Rpl3.4     | 4.27E-42 | 0.45018647 | 0.937 | 0.832 | 7.02E-38 | 6 |
| mt-Atp8.4  | 8.14E-42 | 0.37200798 | 0.972 | 0.927 | 1.34E-37 | 6 |

|            |          |            |       |       |            |    |
|------------|----------|------------|-------|-------|------------|----|
| Ikzf3      | 2.70E-41 | 0.62562184 | 0.333 | 0.105 | 4.44E-37   | 6  |
| Rps20.5    | 3.53E-41 | 0.34021005 | 0.995 | 0.971 | 5.81E-37   | 6  |
| Cd52.4     | 5.43E-41 | 0.54462095 | 0.917 | 0.724 | 8.93E-37   | 6  |
| H2-Q7.11   | 1.66E-08 | 0.54312183 | 0.524 | 0.252 | 0.00027262 | 16 |
| C1qc.6     | 6.42E-40 | -2.6371775 | 0.03  | 0.35  | 1.06E-35   | 6  |
| Rps2.4     | 1.16E-39 | 0.36510722 | 0.982 | 0.942 | 1.91E-35   | 6  |
| Pltp.6     | 1.50E-39 | -1.7394018 | 0.03  | 0.353 | 2.47E-35   | 6  |
| Pold4.1    | 3.40E-39 | 0.76720806 | 0.398 | 0.155 | 5.59E-35   | 6  |
| Rps3a1.4   | 1.09E-38 | 0.32551697 | 0.995 | 0.962 | 1.80E-34   | 6  |
| Wfdc17.5   | 2.20E-38 | -1.6916925 | 0.03  | 0.346 | 3.62E-34   | 6  |
| Ier3.4     | 2.50E-38 | -1.7637821 | 0.025 | 0.342 | 4.11E-34   | 6  |
| Nfkbia.4   | 5.05E-38 | -1.2930274 | 0.253 | 0.534 | 8.31E-34   | 6  |
| Rpl9-ps6.4 | 5.79E-38 | 0.37411589 | 0.972 | 0.902 | 9.52E-34   | 6  |
| Rps8.3     | 8.76E-38 | 0.29096542 | 0.997 | 0.982 | 1.44E-33   | 6  |
| Tmem176a.4 | 3.31E-37 | -1.3848743 | 0.038 | 0.349 | 5.45E-33   | 6  |
| Pf4.6      | 8.98E-37 | -2.5036306 | 0.02  | 0.322 | 1.48E-32   | 6  |
| Klf4.5     | 9.82E-37 | -1.6413175 | 0.08  | 0.391 | 1.62E-32   | 6  |
| Mdh1       | 2.13E-36 | 0.73824139 | 0.444 | 0.201 | 3.51E-32   | 6  |
| C1qa.6     | 8.26E-36 | -2.4109794 | 0.05  | 0.345 | 1.36E-31   | 6  |
| Mrc1.6     | 1.44E-35 | -1.7184384 | 0.025 | 0.321 | 2.36E-31   | 6  |
| Cnp        | 1.77E-35 | 0.69004064 | 0.323 | 0.115 | 2.92E-31   | 6  |
| Atp2a3     | 1.78E-35 | 0.6363358  | 0.256 | 0.076 | 2.92E-31   | 6  |
| Pkig       | 2.60E-35 | 0.59681056 | 0.386 | 0.15  | 4.28E-31   | 6  |
| Rpl12.5    | 2.94E-35 | 0.41720448 | 0.912 | 0.753 | 4.84E-31   | 6  |
| mt-Nd5.3   | 5.31E-35 | 0.51255678 | 0.832 | 0.651 | 8.73E-31   | 6  |
| Hvcn1.1    | 6.83E-35 | 0.54847036 | 0.273 | 0.085 | 1.12E-30   | 6  |
| Pou2f2.2   | 1.93E-34 | 0.60842403 | 0.434 | 0.183 | 3.18E-30   | 6  |
| F13a1.5    | 4.95E-34 | -1.7541721 | 0.01  | 0.294 | 8.14E-30   | 6  |
| Fosb.5     | 7.05E-34 | -1.1091787 | 0.226 | 0.517 | 1.16E-29   | 6  |
| Ccl2.6     | 1.06E-33 | -2.1823053 | 0.013 | 0.295 | 1.75E-29   | 6  |
| Rps15a.5   | 1.51E-33 | 0.31234138 | 0.995 | 0.948 | 2.49E-29   | 6  |
| Eef1a1.4   | 1.53E-33 | 0.28291081 | 0.997 | 0.979 | 2.52E-29   | 6  |
| Hist1h1e   | 2.33E-33 | 0.66677666 | 0.276 | 0.09  | 3.84E-29   | 6  |
| Tsc22d3.1  | 5.49E-33 | 0.698047   | 0.429 | 0.19  | 9.03E-29   | 6  |
| Rps7.4     | 5.99E-33 | 0.32263795 | 0.977 | 0.94  | 9.85E-29   | 6  |
| Gpcpd1.1   | 6.28E-33 | 0.66541358 | 0.363 | 0.145 | 1.03E-28   | 6  |
| Capg.3     | 6.84E-33 | 0.63536126 | 0.506 | 0.245 | 1.13E-28   | 6  |
| Npc2.5     | 1.97E-32 | -0.9306395 | 0.246 | 0.526 | 3.23E-28   | 6  |
| Tagln2.3   | 4.59E-32 | -0.9841606 | 0.226 | 0.504 | 7.55E-28   | 6  |
| Man1a      | 2.87E-31 | 0.61609842 | 0.396 | 0.167 | 4.72E-27   | 6  |
| Rps5.4     | 3.06E-31 | 0.28674937 | 0.99  | 0.961 | 5.03E-27   | 6  |
| Rpl32.4    | 3.38E-31 | 0.2977935  | 0.985 | 0.947 | 5.56E-27   | 6  |
| Fcgrt.5    | 5.04E-31 | -1.3959371 | 0.008 | 0.27  | 8.29E-27   | 6  |

|            |          |            |       |       |          |   |
|------------|----------|------------|-------|-------|----------|---|
| Rilpl2.1   | 5.63E-31 | 0.67117187 | 0.439 | 0.205 | 9.27E-27 | 6 |
| Cd14.5     | 6.09E-31 | -1.5247027 | 0.01  | 0.274 | 1.00E-26 | 6 |
| Mafb.5     | 6.15E-31 | -1.74054   | 0.013 | 0.277 | 1.01E-26 | 6 |
| Aldoa.3    | 6.20E-31 | 0.59658548 | 0.619 | 0.353 | 1.02E-26 | 6 |
| Ifngr1.3   | 7.36E-31 | -1.1269664 | 0.115 | 0.397 | 1.21E-26 | 6 |
| Rps27.5    | 9.40E-31 | 0.36366377 | 0.952 | 0.899 | 1.55E-26 | 6 |
| Vgll4      | 1.15E-30 | 0.59350767 | 0.283 | 0.1   | 1.90E-26 | 6 |
| Rpl14.5    | 2.55E-30 | 0.40082777 | 0.905 | 0.78  | 4.20E-26 | 6 |
| Ctsd.6     | 2.58E-30 | -1.2769616 | 0.038 | 0.304 | 4.25E-26 | 6 |
| Cxcl2.6    | 1.65E-29 | -2.3403017 | 0.01  | 0.263 | 2.71E-25 | 6 |
| Tcf4.1     | 4.11E-29 | 0.58745416 | 0.348 | 0.143 | 6.77E-25 | 6 |
| Rgs10.5    | 7.52E-29 | -1.0949295 | 0.033 | 0.288 | 1.24E-24 | 6 |
| Clec10a.6  | 9.06E-29 | -1.4393432 | 0.01  | 0.258 | 1.49E-24 | 6 |
| Rpl27a.4   | 9.64E-29 | 0.33288082 | 0.957 | 0.885 | 1.59E-24 | 6 |
| Rps13.4    | 1.74E-28 | 0.33801698 | 0.94  | 0.825 | 2.86E-24 | 6 |
| Hsp90ab1.1 | 2.91E-28 | 0.46217274 | 0.902 | 0.801 | 4.79E-24 | 6 |
| Cd68.5     | 3.55E-28 | -1.1279371 | 0.033 | 0.285 | 5.84E-24 | 6 |
| Laptm5.1   | 3.57E-28 | -0.6639892 | 0.439 | 0.666 | 5.86E-24 | 6 |
| Cybb.4     | 8.78E-28 | 0.61747545 | 0.564 | 0.317 | 1.44E-23 | 6 |
| Mgl2.6     | 1.19E-27 | -1.3292162 | 0.015 | 0.258 | 1.96E-23 | 6 |
| Grn.5      | 2.38E-27 | -1.1818444 | 0.135 | 0.389 | 3.91E-23 | 6 |
| Rplp0.4    | 3.01E-27 | 0.33832137 | 0.97  | 0.9   | 4.96E-23 | 6 |
| Rpl19.4    | 6.57E-27 | 0.27667304 | 0.987 | 0.953 | 1.08E-22 | 6 |
| Ptpn6.5    | 6.65E-27 | 0.62132839 | 0.474 | 0.247 | 1.09E-22 | 6 |
| Rps9.1     | 8.74E-27 | 0.27501327 | 0.987 | 0.962 | 1.44E-22 | 6 |
| Rps26.4    | 1.02E-26 | 0.30102051 | 0.977 | 0.932 | 1.67E-22 | 6 |
| Rpl10a.4   | 2.63E-26 | 0.36154236 | 0.917 | 0.861 | 4.32E-22 | 6 |
| Ier2.5     | 3.43E-26 | -0.8421959 | 0.336 | 0.568 | 5.64E-22 | 6 |
| Psap.4     | 4.87E-26 | -0.9238527 | 0.589 | 0.681 | 8.01E-22 | 6 |
| Lamp1.6    | 5.49E-26 | -0.9803985 | 0.183 | 0.426 | 9.03E-22 | 6 |
| Macf1.3    | 6.80E-26 | 0.56123079 | 0.456 | 0.234 | 1.12E-21 | 6 |
| Fyb.5      | 9.83E-26 | -1.0563015 | 0.028 | 0.262 | 1.62E-21 | 6 |
| Rpl18a.4   | 1.30E-25 | 0.26609253 | 0.985 | 0.961 | 2.14E-21 | 6 |
| Zfp36l2.2  | 1.69E-25 | -0.9758997 | 0.143 | 0.392 | 2.78E-21 | 6 |
| Plp2.1     | 2.18E-25 | 0.54083185 | 0.336 | 0.146 | 3.59E-21 | 6 |
| Rpl29.4    | 3.10E-25 | 0.31470163 | 0.93  | 0.853 | 5.10E-21 | 6 |
| Foxp1.3    | 3.46E-25 | 0.52915343 | 0.481 | 0.255 | 5.69E-21 | 6 |
| Cd2.1      | 6.87E-25 | 0.50534128 | 0.288 | 0.112 | 1.13E-20 | 6 |
| Blnk       | 8.17E-25 | 0.53439081 | 0.296 | 0.118 | 1.34E-20 | 6 |
| Rpl30.3    | 8.33E-25 | 0.25601172 | 0.982 | 0.952 | 1.37E-20 | 6 |
| Rps11.3    | 9.12E-25 | 0.26863225 | 0.985 | 0.966 | 1.50E-20 | 6 |
| Zyx.5      | 1.28E-24 | -0.9603502 | 0.043 | 0.275 | 2.11E-20 | 6 |
| Ly6e.4     | 1.55E-24 | 0.32250057 | 0.927 | 0.741 | 2.55E-20 | 6 |

|            |          |            |       |       |            |    |
|------------|----------|------------|-------|-------|------------|----|
| Lyn.4      | 2.29E-24 | 0.54821522 | 0.444 | 0.231 | 3.77E-20   | 6  |
| Gadd45b.5  | 2.39E-24 | -1.1131526 | 0.038 | 0.262 | 3.94E-20   | 6  |
| Socs3.6    | 2.47E-24 | -1.0631097 | 0.058 | 0.291 | 4.06E-20   | 6  |
| Crip1.4    | 6.11E-24 | -0.843414  | 0.604 | 0.727 | 1.00E-19   | 6  |
| Gimap1     | 7.41E-24 | 0.4231328  | 0.256 | 0.094 | 1.22E-19   | 6  |
| Lgals1.4   | 8.96E-24 | -0.9578855 | 0.175 | 0.415 | 1.47E-19   | 6  |
| Rpl18.3    | 1.15E-23 | 0.2855475  | 0.972 | 0.921 | 1.89E-19   | 6  |
| Atox1.5    | 1.78E-23 | -0.8625223 | 0.248 | 0.467 | 2.92E-19   | 6  |
| Rpl35.3    | 2.49E-23 | 0.28855019 | 0.972 | 0.922 | 4.09E-19   | 6  |
| Il1b.5     | 2.54E-23 | -1.7632844 | 0.038 | 0.255 | 4.18E-19   | 6  |
| Rps3.4     | 4.10E-23 | 0.27457633 | 0.97  | 0.91  | 6.74E-19   | 6  |
| Rpl36.5    | 7.48E-23 | 0.30509869 | 0.952 | 0.897 | 1.23E-18   | 6  |
| Cd83.4     | 8.59E-23 | 0.48237622 | 0.702 | 0.458 | 1.41E-18   | 6  |
| Lgals3.5   | 1.20E-22 | -0.9789214 | 0.128 | 0.361 | 1.98E-18   | 6  |
| Vim.5      | 3.57E-22 | -0.6824921 | 0.426 | 0.633 | 5.87E-18   | 6  |
| Btg2.4     | 7.25E-22 | -0.5620551 | 0.511 | 0.679 | 1.19E-17   | 6  |
| Lgmn.5     | 7.43E-22 | -1.0866815 | 0.073 | 0.29  | 1.22E-17   | 6  |
| Gimap6.2   | 8.89E-22 | 0.33261278 | 0.393 | 0.181 | 1.46E-17   | 6  |
| Efhd2.4    | 1.44E-21 | -0.8634735 | 0.088 | 0.307 | 2.37E-17   | 6  |
| Ninj1.5    | 1.80E-21 | -1.086699  | 0.045 | 0.253 | 2.96E-17   | 6  |
| Arf6.2     | 4.02E-21 | 0.53692224 | 0.431 | 0.235 | 6.61E-17   | 6  |
| Hexa.4     | 4.16E-21 | -0.9332519 | 0.088 | 0.302 | 6.84E-17   | 6  |
| Zeb2.5     | 4.31E-21 | -0.9405723 | 0.093 | 0.306 | 7.09E-17   | 6  |
| Rpl13a.5   | 4.87E-21 | 0.31557277 | 0.89  | 0.809 | 8.01E-17   | 6  |
| Ahnak.5    | 8.15E-21 | -0.8026932 | 0.376 | 0.556 | 1.34E-16   | 6  |
| App.4      | 1.56E-20 | -0.8791489 | 0.073 | 0.284 | 2.57E-16   | 6  |
| Rpl26.3    | 3.35E-20 | 0.28587793 | 0.952 | 0.896 | 5.51E-16   | 6  |
| Rps12.2    | 3.46E-20 | 0.27962906 | 0.952 | 0.937 | 5.69E-16   | 6  |
| Npm1.4     | 8.26E-20 | 0.48983305 | 0.694 | 0.522 | 1.36E-15   | 6  |
| Rpl11.4    | 9.44E-20 | 0.25688967 | 0.955 | 0.925 | 1.55E-15   | 6  |
| Rpl36a.5   | 1.05E-19 | 0.34927637 | 0.842 | 0.756 | 1.73E-15   | 6  |
| Syk.2      | 1.26E-19 | 0.49252393 | 0.391 | 0.202 | 2.07E-15   | 6  |
| H2-T23.1   | 1.21E-05 | 0.54102726 | 0.625 | 0.22  | 0.19853968 | 20 |
| Ifi2712a.5 | 2.62E-19 | -1.21411   | 0.228 | 0.412 | 4.31E-15   | 6  |
| Fxyd5.6    | 3.03E-19 | -0.7500435 | 0.286 | 0.475 | 4.98E-15   | 6  |
| Malat1.3   | 3.07E-19 | 0.32632359 | 0.955 | 0.935 | 5.05E-15   | 6  |
| Anxa5.5    | 3.52E-19 | -0.7632106 | 0.14  | 0.353 | 5.79E-15   | 6  |
| Cbr2.6     | 3.61E-19 | -1.2909623 | 0.063 | 0.252 | 5.93E-15   | 6  |
| Mif4gd     | 5.51E-19 | 0.45992708 | 0.263 | 0.113 | 9.06E-15   | 6  |
| Emp3.3     | 6.03E-19 | -0.6857058 | 0.233 | 0.444 | 9.92E-15   | 6  |
| Jun.6      | 8.66E-19 | -1.3157876 | 0.296 | 0.471 | 1.42E-14   | 6  |
| Anxa2.6    | 9.53E-19 | -0.8806512 | 0.085 | 0.285 | 1.57E-14   | 6  |
| Marcks.5   | 9.93E-19 | -0.8803211 | 0.143 | 0.342 | 1.63E-14   | 6  |

|           |          |            |       |       |          |   |
|-----------|----------|------------|-------|-------|----------|---|
| Ctsa.5    | 1.16E-18 | -0.8171087 | 0.095 | 0.294 | 1.91E-14 | 6 |
| Stk17b.4  | 1.94E-18 | 0.4472479  | 0.619 | 0.427 | 3.18E-14 | 6 |
| Rpl39.5   | 2.09E-18 | 0.27602279 | 0.947 | 0.887 | 3.44E-14 | 6 |
| Rpl6.4    | 2.11E-18 | 0.25383812 | 0.962 | 0.893 | 3.47E-14 | 6 |
| Eef2.4    | 2.11E-18 | 0.348958   | 0.855 | 0.725 | 3.48E-14 | 6 |
| Tnfaip3.5 | 5.34E-18 | -0.7629616 | 0.13  | 0.339 | 8.78E-14 | 6 |
| Rab4b     | 7.63E-18 | 0.42946326 | 0.261 | 0.116 | 1.25E-13 | 6 |
| Aldh2.3   | 8.96E-18 | 0.48639955 | 0.373 | 0.198 | 1.47E-13 | 6 |
| Eef1g.3   | 9.39E-18 | 0.41468473 | 0.569 | 0.365 | 1.54E-13 | 6 |
| Kmt2e.2   | 2.68E-17 | 0.4498003  | 0.446 | 0.261 | 4.41E-13 | 6 |
| Serf2.4   | 4.34E-17 | -0.4072051 | 0.682 | 0.766 | 7.13E-13 | 6 |
| Gm26917.1 | 7.03E-17 | 0.61456461 | 0.571 | 0.392 | 1.16E-12 | 6 |
| Ppdpf.1   | 7.12E-17 | 0.480197   | 0.338 | 0.177 | 1.17E-12 | 6 |
| Prkcb     | 8.51E-17 | 0.422058   | 0.296 | 0.141 | 1.40E-12 | 6 |
| Klf6.6    | 1.02E-16 | -0.7783492 | 0.373 | 0.539 | 1.67E-12 | 6 |
| Serp1.3   | 2.13E-16 | 0.41715209 | 0.564 | 0.366 | 3.50E-12 | 6 |
| Ehd4.5    | 2.28E-16 | -0.7852679 | 0.095 | 0.276 | 3.75E-12 | 6 |
| Myl6.2    | 2.99E-16 | -0.4826021 | 0.521 | 0.66  | 4.91E-12 | 6 |
| Mcl1.5    | 3.71E-16 | -0.7263985 | 0.258 | 0.436 | 6.10E-12 | 6 |
| Atf3.5    | 8.52E-16 | -0.8137434 | 0.351 | 0.515 | 1.40E-11 | 6 |
| Ncf1      | 1.10E-15 | 0.41219625 | 0.283 | 0.138 | 1.81E-11 | 6 |
| Cfp.5     | 1.66E-15 | -0.8389885 | 0.145 | 0.321 | 2.73E-11 | 6 |
| Arhgdib.4 | 2.74E-15 | 0.33204339 | 0.734 | 0.588 | 4.51E-11 | 6 |
| Rpl22.2   | 4.64E-15 | 0.25477827 | 0.89  | 0.824 | 7.63E-11 | 6 |
| Srsf11    | 1.01E-14 | 0.41792584 | 0.321 | 0.172 | 1.66E-10 | 6 |
| Gimap3.1  | 1.04E-14 | 0.32816713 | 0.311 | 0.155 | 1.71E-10 | 6 |
| Sub1.3    | 1.07E-14 | 0.39553531 | 0.627 | 0.455 | 1.76E-10 | 6 |
| Ncf4.1    | 1.40E-14 | 0.39839824 | 0.256 | 0.122 | 2.31E-10 | 6 |
| H2afz.5   | 2.14E-14 | -0.623084  | 0.469 | 0.594 | 3.52E-10 | 6 |
| Rrbp1.4   | 2.36E-14 | -0.6213804 | 0.178 | 0.357 | 3.88E-10 | 6 |
| Rel.5     | 2.76E-14 | 0.43445664 | 0.439 | 0.272 | 4.54E-10 | 6 |
| Gstm1.4   | 2.92E-14 | 0.32634133 | 0.799 | 0.637 | 4.80E-10 | 6 |
| Hspa4     | 5.45E-14 | 0.41800953 | 0.353 | 0.199 | 8.97E-10 | 6 |
| Rpl4.4    | 1.85E-13 | 0.3139048  | 0.769 | 0.638 | 3.04E-09 | 6 |
| Rps6.5    | 2.08E-13 | 0.255295   | 0.862 | 0.767 | 3.43E-09 | 6 |
| Tgif1     | 2.95E-13 | 0.39297032 | 0.256 | 0.128 | 4.85E-09 | 6 |
| Smim14.1  | 3.64E-13 | 0.39324606 | 0.318 | 0.175 | 5.98E-09 | 6 |
| Sem1.4    | 4.29E-13 | -0.4962134 | 0.416 | 0.556 | 7.06E-09 | 6 |
| Selplg.4  | 4.39E-13 | -0.6493719 | 0.15  | 0.314 | 7.22E-09 | 6 |
| B2m.2     | 4.53E-13 | -0.342376  | 0.727 | 0.812 | 7.45E-09 | 6 |
| Eef1d.3   | 6.86E-13 | 0.36336683 | 0.571 | 0.403 | 1.13E-08 | 6 |
| Sept1.1   | 7.65E-13 | 0.27621828 | 0.308 | 0.161 | 1.26E-08 | 6 |
| Coro1a.5  | 8.86E-13 | 0.27208797 | 0.802 | 0.628 | 1.46E-08 | 6 |

|            |          |            |       |       |            |    |
|------------|----------|------------|-------|-------|------------|----|
| Bri3.5     | 9.04E-13 | -0.5681203 | 0.213 | 0.38  | 1.49E-08   | 6  |
| Uvrag      | 1.25E-12 | 0.38734843 | 0.303 | 0.166 | 2.05E-08   | 6  |
| Nrros.6    | 1.47E-12 | -0.6594148 | 0.138 | 0.292 | 2.41E-08   | 6  |
| Hmgn1.1    | 1.77E-12 | 0.36904393 | 0.378 | 0.221 | 2.91E-08   | 6  |
| Marcksl1.5 | 1.87E-12 | -0.89003   | 0.308 | 0.442 | 3.08E-08   | 6  |
| H2afy.4    | 2.25E-12 | -0.6483403 | 0.11  | 0.26  | 3.70E-08   | 6  |
| Rpl5.3     | 2.42E-12 | 0.26776541 | 0.822 | 0.711 | 3.98E-08   | 6  |
| H2-D1.11   | 2.13E-08 | 0.53665943 | 1     | 0.89  | 0.00035028 | 18 |
| Ehd1.1     | 3.98E-12 | 0.31726786 | 0.331 | 0.187 | 6.54E-08   | 6  |
| Tspo.2     | 5.68E-12 | -0.4789976 | 0.276 | 0.431 | 9.35E-08   | 6  |
| Naca.3     | 5.70E-12 | 0.28645181 | 0.757 | 0.653 | 9.38E-08   | 6  |
| Rpl21.4    | 5.87E-12 | 0.28354878 | 0.789 | 0.671 | 9.66E-08   | 6  |
| Zfp706     | 6.44E-12 | 0.41610946 | 0.466 | 0.316 | 1.06E-07   | 6  |
| Ptms.4     | 7.09E-12 | -0.5954415 | 0.143 | 0.296 | 1.17E-07   | 6  |
| Ctsc.5     | 1.28E-11 | -0.751933  | 0.288 | 0.422 | 2.10E-07   | 6  |
| Wdfy4.1    | 1.57E-11 | 0.2530058  | 0.256 | 0.132 | 2.59E-07   | 6  |
| Eif3i.2    | 1.64E-11 | 0.42441357 | 0.404 | 0.259 | 2.70E-07   | 6  |
| Csk        | 1.97E-11 | 0.32187409 | 0.341 | 0.197 | 3.24E-07   | 6  |
| Tmod3      | 2.02E-11 | 0.34951306 | 0.273 | 0.147 | 3.33E-07   | 6  |
| Gnai2.5    | 2.24E-11 | -0.4789454 | 0.401 | 0.535 | 3.68E-07   | 6  |
| Gdi2.1     | 2.27E-11 | 0.38392992 | 0.519 | 0.367 | 3.73E-07   | 6  |
| Eif3f.4    | 2.59E-11 | 0.2691111  | 0.739 | 0.611 | 4.27E-07   | 6  |
| Zfand5.4   | 2.74E-11 | -0.6474458 | 0.128 | 0.269 | 4.50E-07   | 6  |
| Ly86.3     | 3.74E-11 | 0.32780838 | 0.474 | 0.31  | 6.16E-07   | 6  |
| Gmfg       | 3.87E-11 | -0.4868952 | 0.193 | 0.35  | 6.36E-07   | 6  |
| Atp6v0b.5  | 4.27E-11 | -0.5689333 | 0.226 | 0.367 | 7.02E-07   | 6  |
| Rbm3.2     | 5.26E-11 | 0.29856313 | 0.679 | 0.546 | 8.65E-07   | 6  |
| Atpif1.5   | 8.88E-11 | -0.5543912 | 0.183 | 0.322 | 1.46E-06   | 6  |
| Gns.1      | 1.09E-10 | 0.35221679 | 0.273 | 0.152 | 1.79E-06   | 6  |
| Kdm6b.5    | 1.19E-10 | -0.5844035 | 0.175 | 0.319 | 1.95E-06   | 6  |
| Ppm1g      | 1.33E-10 | 0.41560883 | 0.261 | 0.146 | 2.18E-06   | 6  |
| Ctss.4     | 1.95E-10 | -0.4958283 | 0.378 | 0.508 | 3.21E-06   | 6  |
| Neat1.5    | 2.07E-10 | -0.7311298 | 0.201 | 0.333 | 3.41E-06   | 6  |
| Gng5.4     | 2.48E-10 | -0.3868517 | 0.504 | 0.602 | 4.08E-06   | 6  |
| H2-T22     | 1.74E-23 | 0.53319329 | 0.286 | 0.147 | 2.86E-19   | 4  |
| Ptpn1.1    | 3.33E-10 | 0.34257947 | 0.378 | 0.239 | 5.47E-06   | 6  |
| Tmem123    | 3.39E-10 | 0.29491763 | 0.273 | 0.151 | 5.58E-06   | 6  |
| Cebpb.6    | 3.44E-10 | -0.6904218 | 0.203 | 0.336 | 5.66E-06   | 6  |
| Kctd12.5   | 5.13E-10 | -0.5863457 | 0.241 | 0.378 | 8.43E-06   | 6  |
| Msn.4      | 5.29E-10 | 0.31694487 | 0.576 | 0.427 | 8.70E-06   | 6  |
| Nol7.3     | 6.86E-10 | 0.31151036 | 0.404 | 0.263 | 1.13E-05   | 6  |
| S100a6.5   | 7.77E-10 | -0.3643697 | 0.727 | 0.754 | 1.28E-05   | 6  |
| Rhog.1     | 1.04E-09 | -0.4870264 | 0.165 | 0.299 | 1.71E-05   | 6  |



|             |          |            |       |       |            |   |
|-------------|----------|------------|-------|-------|------------|---|
| Itgb2.5     | 1.16E-09 | -0.5633469 | 0.143 | 0.274 | 1.92E-05   | 6 |
| Serbp1.3    | 1.29E-09 | 0.34884065 | 0.514 | 0.378 | 2.12E-05   | 6 |
| Hnrnpa1.3   | 1.35E-09 | 0.33460253 | 0.436 | 0.295 | 2.22E-05   | 6 |
| Gm2a.6      | 3.60E-09 | -0.5807561 | 0.168 | 0.293 | 5.92E-05   | 6 |
| Spi1.5      | 4.20E-09 | -0.5136943 | 0.185 | 0.312 | 6.92E-05   | 6 |
| Akr1a1.4    | 4.82E-09 | -0.4616868 | 0.228 | 0.359 | 7.93E-05   | 6 |
| AY036118.3  | 4.90E-09 | 0.61899065 | 0.872 | 0.779 | 8.06E-05   | 6 |
| Sat1.6      | 5.89E-09 | -0.5502644 | 0.221 | 0.346 | 9.68E-05   | 6 |
| Snx3.4      | 6.63E-09 | -0.4449217 | 0.228 | 0.357 | 0.00010901 | 6 |
| Add3.1      | 7.41E-09 | 0.28522019 | 0.266 | 0.156 | 0.00012182 | 6 |
| Clta.5      | 7.77E-09 | -0.4276394 | 0.456 | 0.554 | 0.00012776 | 6 |
| Apobec3.1   | 8.05E-09 | 0.36462001 | 0.301 | 0.187 | 0.00013239 | 6 |
| Luc7l2      | 8.05E-09 | 0.33289619 | 0.356 | 0.234 | 0.0001324  | 6 |
| Nop10.1     | 8.61E-09 | 0.294257   | 0.393 | 0.263 | 0.00014171 | 6 |
| Prpf8       | 9.16E-09 | 0.34048126 | 0.263 | 0.157 | 0.00015072 | 6 |
| Thrap3      | 9.40E-09 | 0.32447031 | 0.268 | 0.16  | 0.0001546  | 6 |
| Ccnl1.4     | 9.79E-09 | -0.4624827 | 0.183 | 0.313 | 0.00016097 | 6 |
| Rnaset2a.3  | 1.43E-08 | -0.4487792 | 0.16  | 0.285 | 0.00023597 | 6 |
| Vamp8.5     | 1.59E-08 | -0.4527941 | 0.223 | 0.348 | 0.00026118 | 6 |
| Dbi.3       | 1.66E-08 | -0.4605909 | 0.175 | 0.298 | 0.00027373 | 6 |
| Tubb4b      | 1.98E-08 | 0.27386259 | 0.266 | 0.156 | 0.00032651 | 6 |
| Nap1l1.2    | 2.04E-08 | 0.30461382 | 0.376 | 0.255 | 0.0003354  | 6 |
| Arf5.3      | 2.04E-08 | -0.4224289 | 0.296 | 0.418 | 0.00033584 | 6 |
| Gltp.2      | 2.21E-08 | -0.4879584 | 0.145 | 0.264 | 0.00036433 | 6 |
| Ppp1r15a.5  | 2.34E-08 | -0.3878497 | 0.228 | 0.363 | 0.00038481 | 6 |
| Hnrnpa2b1.1 | 2.61E-08 | 0.27885729 | 0.677 | 0.547 | 0.00042941 | 6 |
| Eif4a2      | 2.61E-08 | 0.31945622 | 0.256 | 0.152 | 0.00042996 | 6 |
| Atp5b.2     | 2.72E-08 | 0.29427629 | 0.484 | 0.353 | 0.0004476  | 6 |
| Rpl17.3     | 2.84E-08 | 0.26222288 | 0.679 | 0.566 | 0.00046776 | 6 |
| Gsta4.2     | 3.30E-08 | 0.34446222 | 0.338 | 0.219 | 0.0005427  | 6 |
| Eif5a.2     | 3.69E-08 | 0.27589901 | 0.551 | 0.417 | 0.00060654 | 6 |
| Sp100.2     | 4.93E-08 | 0.26196324 | 0.331 | 0.212 | 0.00081015 | 6 |
| Zfp106      | 5.01E-08 | 0.29071113 | 0.263 | 0.159 | 0.00082447 | 6 |
| Eif4b       | 6.87E-08 | 0.27867214 | 0.303 | 0.192 | 0.00113001 | 6 |
| Rtn4.4      | 1.23E-07 | -0.4701447 | 0.145 | 0.256 | 0.00202388 | 6 |
| Man2b1.4    | 1.25E-07 | -0.4359156 | 0.188 | 0.305 | 0.00205075 | 6 |
| Atp6v0c.5   | 1.31E-07 | -0.4718875 | 0.323 | 0.429 | 0.00215287 | 6 |
| Ncl.4       | 1.73E-07 | 0.33881035 | 0.486 | 0.369 | 0.0028489  | 6 |
| Nme2.2      | 1.79E-07 | 0.25541444 | 0.647 | 0.546 | 0.00294385 | 6 |
| Tnfaip8     | 2.02E-07 | 0.33559637 | 0.283 | 0.179 | 0.00332376 | 6 |
| Cstb.4      | 2.15E-07 | -0.4464438 | 0.153 | 0.263 | 0.00353231 | 6 |
| Rac1.2      | 2.32E-07 | -0.3767023 | 0.333 | 0.439 | 0.00381583 | 6 |
| Psmb9.2     | 2.61E-07 | 0.34663943 | 0.346 | 0.236 | 0.00428864 | 6 |

|           |          |            |       |       |            |   |
|-----------|----------|------------|-------|-------|------------|---|
| Prrc2c.1  | 2.91E-07 | 0.28429056 | 0.383 | 0.271 | 0.00478849 | 6 |
| Selenok   | 5.10E-07 | -0.4290922 | 0.266 | 0.367 | 0.00838982 | 6 |
| Reep5.1   | 8.72E-07 | -0.3340294 | 0.243 | 0.36  | 0.01434751 | 6 |
| Calr      | 9.02E-07 | -0.3660766 | 0.226 | 0.342 | 0.01483973 | 6 |
| Vdac2     | 1.07E-06 | 0.27227147 | 0.331 | 0.224 | 0.01763477 | 6 |
| Ier5.4    | 1.08E-06 | -0.377616  | 0.263 | 0.377 | 0.01783514 | 6 |
| Psme1.3   | 1.11E-06 | 0.27126697 | 0.526 | 0.398 | 0.01827531 | 6 |
| Sdcbp.4   | 1.12E-06 | -0.424846  | 0.178 | 0.28  | 0.01847307 | 6 |
| Ccnd2.1   | 1.28E-06 | 0.28322633 | 0.298 | 0.2   | 0.02105326 | 6 |
| Tcp1      | 1.35E-06 | 0.26230646 | 0.273 | 0.177 | 0.02224471 | 6 |
| Rap1b.4   | 1.70E-06 | -0.3972443 | 0.328 | 0.42  | 0.02803532 | 6 |
| Pomp.2    | 1.88E-06 | -0.3221527 | 0.216 | 0.328 | 0.03093644 | 6 |
| Eif3e.3   | 2.09E-06 | 0.27419114 | 0.368 | 0.26  | 0.03439491 | 6 |
| Tomm20.1  | 2.41E-06 | 0.27497017 | 0.353 | 0.248 | 0.03961449 | 6 |
| Prdx5.4   | 2.73E-06 | -0.4378651 | 0.243 | 0.34  | 0.04483113 | 6 |
| Inpp5d    | 2.80E-06 | 0.31919238 | 0.268 | 0.18  | 0.04600292 | 6 |
| Cnbp.5    | 3.61E-06 | 0.25303055 | 0.539 | 0.424 | 0.05932593 | 6 |
| Hspe1.2   | 3.87E-06 | 0.266999   | 0.396 | 0.291 | 0.06363008 | 6 |
| Dbnl      | 6.01E-06 | 0.30178691 | 0.286 | 0.197 | 0.09886315 | 6 |
| Ddx6      | 6.01E-06 | 0.2569403  | 0.283 | 0.189 | 0.09892458 | 6 |
| Polr2a.2  | 6.34E-06 | 0.25848028 | 0.303 | 0.21  | 0.10426322 | 6 |
| Cdc42se2  | 7.90E-06 | 0.28095391 | 0.266 | 0.181 | 0.12996314 | 6 |
| Mif.4     | 8.50E-06 | 0.27548804 | 0.341 | 0.243 | 0.13979958 | 6 |
| Smdt1.3   | 8.81E-06 | -0.3559467 | 0.261 | 0.357 | 0.14498825 | 6 |
| Ybx1      | 9.16E-06 | 0.27875284 | 0.647 | 0.55  | 0.15068402 | 6 |
| Atp2b1.6  | 9.91E-06 | -0.3992726 | 0.258 | 0.351 | 0.16307456 | 6 |
| Sec61b.3  | 1.10E-05 | -0.3305897 | 0.421 | 0.486 | 0.18082806 | 6 |
| Tmsb10.5  | 1.25E-05 | -0.4372646 | 0.952 | 0.777 | 0.20533457 | 6 |
| Ppp1r18.2 | 1.30E-05 | -0.3885101 | 0.173 | 0.264 | 0.21345677 | 6 |
| Arpc1b.4  | 1.37E-05 | -0.2820351 | 0.596 | 0.624 | 0.22537309 | 6 |
| Lsm4.2    | 1.56E-05 | 0.28083841 | 0.323 | 0.234 | 0.25597918 | 6 |
| Syngt2.4  | 1.66E-05 | -0.3718407 | 0.163 | 0.252 | 0.27237457 | 6 |
| Ubc.4     | 1.84E-05 | -0.3528685 | 0.476 | 0.544 | 0.30296852 | 6 |
| Rbms1.5   | 1.85E-05 | -0.3586957 | 0.173 | 0.261 | 0.30510232 | 6 |
| Ptges3    | 2.09E-05 | 0.260155   | 0.268 | 0.184 | 0.34307653 | 6 |
| Ubl3.1    | 2.58E-05 | 0.29356093 | 0.301 | 0.217 | 0.42415181 | 6 |
| Cyfp1.1   | 3.39E-05 | 0.2653724  | 0.253 | 0.173 | 0.55737929 | 6 |
| Atp5j2    | 3.99E-05 | -0.2856527 | 0.343 | 0.428 | 0.6566644  | 6 |
| Tmed10.3  | 4.15E-05 | -0.3172123 | 0.198 | 0.29  | 0.68310028 | 6 |
| Jund.5    | 4.61E-05 | -0.3290493 | 0.634 | 0.685 | 0.75784412 | 6 |
| Dnaja1.2  | 4.90E-05 | -0.4125415 | 0.178 | 0.26  | 0.80598279 | 6 |
| Tmem50a.1 | 6.06E-05 | -0.2985266 | 0.261 | 0.35  | 0.99721131 | 6 |
| Sf1       | 8.56E-05 | 0.25905605 | 0.291 | 0.21  | 1          | 6 |

|            |            |            |       |       |            |    |
|------------|------------|------------|-------|-------|------------|----|
| Calm3      | 0.00037789 | -0.2902982 | 0.18  | 0.254 | 1          | 6  |
| Fkbp1a.3   | 0.00048429 | -0.3462803 | 0.19  | 0.256 | 1          | 6  |
| Ctsh.4     | 0.0005442  | -0.3006198 | 0.326 | 0.389 | 1          | 6  |
| Snx5.6     | 0.00055837 | -0.304413  | 0.248 | 0.321 | 1          | 6  |
| Gpi1       | 0.00058187 | 0.28059983 | 0.383 | 0.31  | 1          | 6  |
| Serinc3.6  | 0.000674   | -0.4041759 | 0.303 | 0.36  | 1          | 6  |
| S100a10.5  | 0.00082652 | -0.3369059 | 0.416 | 0.462 | 1          | 6  |
| Flna.4     | 0.000839   | -0.2988274 | 0.233 | 0.302 | 1          | 6  |
| Cd53       | 0.00121169 | -0.250011  | 0.251 | 0.319 | 1          | 6  |
| Ran.2      | 0.00148085 | 0.25325354 | 0.358 | 0.296 | 1          | 6  |
| Wnk1.2     | 0.00196351 | -0.267745  | 0.201 | 0.263 | 1          | 6  |
| Fcgr2b.4   | 0.00309234 | -0.2773251 | 0.221 | 0.282 | 1          | 6  |
| Selenof    | 0.00348483 | -0.2658451 | 0.228 | 0.284 | 1          | 6  |
| Gzma       | 0          | 4.19953522 | 0.77  | 0.01  | 0          | 7  |
| Gzmb       | 0          | 2.72756723 | 0.56  | 0.01  | 0          | 7  |
| Nkg7.1     | 0          | 2.58716753 | 0.936 | 0.091 | 0          | 7  |
| Ccl5.1     | 0          | 2.45294648 | 0.959 | 0.116 | 0          | 7  |
| AW112010.6 | 0          | 2.39397334 | 0.939 | 0.226 | 0          | 7  |
| Il2rb      | 0          | 2.35098058 | 0.801 | 0.061 | 0          | 7  |
| Prf1       | 0          | 2.19965252 | 0.499 | 0.01  | 0          | 7  |
| Klrb1c     | 0          | 2.04972599 | 0.504 | 0.005 | 0          | 7  |
| Ncr1       | 0          | 1.9671383  | 0.473 | 0.004 | 0          | 7  |
| Ctsw.1     | 0          | 1.68691492 | 0.54  | 0.047 | 0          | 7  |
| Klre1      | 0          | 1.60011999 | 0.376 | 0.007 | 0          | 7  |
| Serpinb9   | 9.98E-287  | 1.76236884 | 0.442 | 0.032 | 1.64E-282  | 7  |
| Klrk1      | 1.82E-275  | 1.62461526 | 0.468 | 0.039 | 3.00E-271  | 7  |
| Xcl1       | 4.08E-262  | 1.65746542 | 0.317 | 0.015 | 6.70E-258  | 7  |
| Serpinb6b  | 3.07E-241  | 1.57106578 | 0.396 | 0.031 | 5.05E-237  | 7  |
| Cd7        | 1.66E-227  | 1.69564774 | 0.419 | 0.038 | 2.73E-223  | 7  |
| Fasl       | 5.11E-192  | 1.18260896 | 0.274 | 0.017 | 8.40E-188  | 7  |
| Sh2d2a     | 1.57E-188  | 1.38089897 | 0.455 | 0.057 | 2.58E-184  | 7  |
| Txk        | 5.50E-161  | 1.16770602 | 0.286 | 0.024 | 9.04E-157  | 7  |
| Cd74.6     | 4.17E-160  | -3.3915131 | 0.192 | 0.86  | 6.85E-156  | 7  |
| Ms4a4b.1   | 2.86E-142  | 1.20718222 | 0.509 | 0.092 | 4.70E-138  | 7  |
| Klrd1      | 4.40E-139  | 1.37029487 | 0.366 | 0.051 | 7.23E-135  | 7  |
| Cst7       | 2.67E-138  | 1.24766902 | 0.317 | 0.037 | 4.40E-134  | 7  |
| H2-Oa.4    | 1.56E-08   | 0.52642206 | 0.319 | 0.141 | 0.00025698 | 13 |
| H2-K1.10   | 1.87E-11   | 0.52199256 | 0.929 | 0.842 | 3.08E-07   | 16 |
| H2-Ab1.6   | 1.50E-46   | 0.50568779 | 0.989 | 0.695 | 2.46E-42   | 8  |
| Tmsb10.6   | 2.66E-116  | 0.84441183 | 1     | 0.775 | 4.38E-112  | 7  |
| Irf8.1     | 4.93E-115  | 1.48708305 | 0.65  | 0.209 | 8.12E-111  | 7  |
| Pfn1.2     | 4.54E-114  | 0.92129396 | 0.959 | 0.854 | 7.46E-110  | 7  |
| Gimap4.2   | 1.50E-108  | 1.25033542 | 0.532 | 0.136 | 2.47E-104  | 7  |

|            |           |            |       |       |            |    |
|------------|-----------|------------|-------|-------|------------|----|
| Lgals1.5   | 4.75E-107 | 1.32331124 | 0.79  | 0.383 | 7.81E-103  | 7  |
| Ugcg       | 2.37E-99  | 1.18439566 | 0.304 | 0.048 | 3.90E-95   | 7  |
| Fth1.5     | 5.09E-98  | -1.1891843 | 0.844 | 0.964 | 8.37E-94   | 7  |
| Cst3.6     | 1.19E-95  | -2.6839711 | 0.217 | 0.709 | 1.96E-91   | 7  |
| Arsb       | 6.97E-94  | 1.10879534 | 0.322 | 0.058 | 1.15E-89   | 7  |
| Lck.1      | 1.52E-93  | 1.0852451  | 0.425 | 0.095 | 2.50E-89   | 7  |
| Skap1.1    | 5.80E-92  | 1.02359185 | 0.399 | 0.085 | 9.53E-88   | 7  |
| Ptprcap.7  | 9.53E-92  | 1.05922683 | 0.675 | 0.244 | 1.57E-87   | 7  |
| Vps37b.5   | 3.04E-90  | 1.06887835 | 0.645 | 0.223 | 5.00E-86   | 7  |
| Hcst.1     | 3.90E-90  | 1.17601996 | 0.56  | 0.176 | 6.41E-86   | 7  |
| Sept1.2    | 1.80E-86  | 1.10848725 | 0.514 | 0.15  | 2.97E-82   | 7  |
| Ftl1.6     | 2.56E-86  | -1.5345314 | 0.696 | 0.901 | 4.21E-82   | 7  |
| Psap.5     | 2.06E-82  | -1.7637927 | 0.217 | 0.7   | 3.38E-78   | 7  |
| Ptprc.4    | 2.97E-78  | 1.07210066 | 0.77  | 0.423 | 4.88E-74   | 7  |
| Gpx1.7     | 4.83E-78  | -1.6172651 | 0.34  | 0.731 | 7.94E-74   | 7  |
| Pik3r1     | 6.06E-75  | 1.24004354 | 0.422 | 0.12  | 9.97E-71   | 7  |
| Lyz2.7     | 9.65E-75  | -2.7710173 | 0.087 | 0.579 | 1.59E-70   | 7  |
| Ccl4       | 2.01E-74  | 1.32114751 | 0.43  | 0.117 | 3.31E-70   | 7  |
| Zfp36.5    | 4.27E-74  | -1.8611733 | 0.161 | 0.635 | 7.02E-70   | 7  |
| Itgal.1    | 3.30E-73  | 1.1183141  | 0.391 | 0.103 | 5.43E-69   | 7  |
| Ifitm3.7   | 4.15E-71  | -2.3426678 | 0.023 | 0.515 | 6.82E-67   | 7  |
| Tyrobp.7   | 3.14E-67  | 0.76473417 | 0.91  | 0.592 | 5.16E-63   | 7  |
| Cd83.5     | 2.25E-66  | -1.8939102 | 0.026 | 0.494 | 3.70E-62   | 7  |
| Fcer1g.6   | 7.88E-66  | 0.72751192 | 0.931 | 0.558 | 1.30E-61   | 7  |
| Ifngr1.4   | 1.37E-65  | 0.91530082 | 0.706 | 0.366 | 2.26E-61   | 7  |
| Ctss.5     | 1.66E-65  | -1.6496513 | 0.056 | 0.524 | 2.73E-61   | 7  |
| H2-Q6.4    | 5.82E-06  | 0.4987245  | 0.32  | 0.156 | 0.09571244 | 15 |
| Bcl2       | 5.24E-64  | 1.04166254 | 0.338 | 0.085 | 8.61E-60   | 7  |
| Atf3.6     | 1.38E-62  | -1.9735857 | 0.082 | 0.529 | 2.27E-58   | 7  |
| Anxa2.7    | 4.72E-62  | 0.97504461 | 0.588 | 0.259 | 7.77E-58   | 7  |
| Fos.5      | 5.28E-61  | -1.874103  | 0.251 | 0.64  | 8.69E-57   | 7  |
| Apoe.6     | 4.33E-59  | -3.2722076 | 0.066 | 0.492 | 7.13E-55   | 7  |
| Gimap5.1   | 3.43E-58  | 0.92594978 | 0.307 | 0.075 | 5.64E-54   | 7  |
| Fosb.6     | 1.13E-56  | -1.6994009 | 0.1   | 0.523 | 1.86E-52   | 7  |
| Unc93b1.3  | 1.14E-54  | -1.4285042 | 0.064 | 0.484 | 1.87E-50   | 7  |
| Ccl6.7     | 1.33E-53  | -2.1205228 | 0.026 | 0.433 | 2.19E-49   | 7  |
| H2-D1.4    | 2.57E-32  | 0.47786198 | 0.959 | 0.887 | 4.23E-28   | 10 |
| Nfkbia.5   | 8.88E-53  | -1.4615435 | 0.136 | 0.54  | 1.46E-48   | 7  |
| Marcksl1.6 | 1.41E-52  | -1.9783075 | 0.054 | 0.455 | 2.31E-48   | 7  |
| Egr1.6     | 1.04E-51  | -2.0907362 | 0.084 | 0.477 | 1.71E-47   | 7  |
| Cd52.5     | 1.76E-51  | 0.6038462  | 0.931 | 0.724 | 2.90E-47   | 7  |
| Mt1.7      | 3.28E-51  | -2.3734278 | 0.043 | 0.435 | 5.40E-47   | 7  |
| Alox5ap.7  | 1.22E-50  | -1.6688872 | 0.023 | 0.417 | 2.00E-46   | 7  |

|             |          |            |       |       |          |    |
|-------------|----------|------------|-------|-------|----------|----|
| Selplg.5    | 1.31E-50 | 0.92838486 | 0.591 | 0.291 | 2.16E-46 | 7  |
| D16Ertd472e | 1.38E-50 | 0.8843032  | 0.271 | 0.068 | 2.28E-46 | 7  |
| lfitm2.7    | 1.39E-50 | -1.7678415 | 0.018 | 0.41  | 2.29E-46 | 7  |
| Ccnd2.2     | 6.03E-50 | 1.04852413 | 0.471 | 0.191 | 9.91E-46 | 7  |
| lfi27l2a.6  | 3.71E-49 | -1.9237764 | 0.038 | 0.421 | 6.10E-45 | 7  |
| ltgb2.6     | 5.55E-49 | 0.99969491 | 0.537 | 0.253 | 9.14E-45 | 7  |
| Spn         | 1.88E-48 | 0.96618179 | 0.276 | 0.074 | 3.09E-44 | 7  |
| Jun.7       | 7.32E-48 | -2.056536  | 0.107 | 0.481 | 1.20E-43 | 7  |
| H2-D1.9     | 1.11E-10 | 0.47745468 | 0.988 | 0.889 | 1.83E-06 | 16 |
| Ctsh.5      | 1.47E-47 | -1.4168465 | 0.028 | 0.404 | 2.43E-43 | 7  |
| Pglyrp1.1   | 3.16E-47 | 0.67997143 | 0.271 | 0.069 | 5.20E-43 | 7  |
| Nfkbiz.6    | 3.71E-47 | -1.6698386 | 0.087 | 0.459 | 6.09E-43 | 7  |
| Rac2.6      | 1.58E-46 | 0.75667579 | 0.734 | 0.468 | 2.60E-42 | 7  |
| Ctsb.6      | 2.70E-46 | -1.7292913 | 0.13  | 0.494 | 4.44E-42 | 7  |
| Dusp5.4     | 3.80E-46 | 0.87529884 | 0.501 | 0.216 | 6.26E-42 | 7  |
| Id2         | 9.28E-46 | 0.9610057  | 0.476 | 0.201 | 1.53E-41 | 7  |
| C1qb.7      | 5.33E-44 | -2.7941386 | 0.02  | 0.37  | 8.77E-40 | 7  |
| Dusp1.5     | 2.72E-43 | -1.2988439 | 0.309 | 0.621 | 4.47E-39 | 7  |
| Tmem176b.5  | 4.19E-43 | -1.3962924 | 0.095 | 0.457 | 6.90E-39 | 7  |
| Wfdc17.6    | 1.97E-41 | -1.8001956 | 0.01  | 0.346 | 3.24E-37 | 7  |
| Pltp.7      | 2.58E-41 | -1.8372761 | 0.018 | 0.353 | 4.24E-37 | 7  |
| Grn.6       | 4.51E-41 | -1.4715425 | 0.049 | 0.393 | 7.42E-37 | 7  |
| Cybb.5      | 8.38E-41 | -1.4426115 | 0.013 | 0.346 | 1.38E-36 | 7  |
| Csf1r.7     | 1.83E-40 | -1.7777262 | 0.018 | 0.349 | 3.01E-36 | 7  |
| Ccnd3.2     | 7.65E-40 | 0.93062608 | 0.381 | 0.149 | 1.26E-35 | 7  |
| Gimap3.2    | 8.69E-40 | 0.81462788 | 0.396 | 0.151 | 1.43E-35 | 7  |
| Pld4.5      | 6.60E-39 | -1.2752266 | 0.018 | 0.342 | 1.09E-34 | 7  |
| Ly86.4      | 7.28E-39 | -1.2809764 | 0.013 | 0.334 | 1.20E-34 | 7  |
| Selenop.7   | 1.05E-38 | -2.2188346 | 0.113 | 0.432 | 1.72E-34 | 7  |
| H2-DMb2.9   | 2.35E-13 | 0.45896283 | 0.741 | 0.239 | 3.86E-09 | 17 |
| C1qa.7      | 1.47E-38 | -2.4738426 | 0.028 | 0.346 | 2.42E-34 | 7  |
| C1qc.7      | 2.70E-38 | -2.4988243 | 0.033 | 0.35  | 4.44E-34 | 7  |
| Marcks.6    | 3.00E-38 | -1.3250146 | 0.023 | 0.348 | 4.93E-34 | 7  |
| Mrc1.7      | 5.51E-38 | -1.7944416 | 0.008 | 0.321 | 9.07E-34 | 7  |
| Myl6.3      | 1.28E-37 | 0.67463357 | 0.803 | 0.645 | 2.10E-33 | 7  |
| Ctsc.6      | 1.47E-37 | -1.3233729 | 0.1   | 0.431 | 2.42E-33 | 7  |
| Cfp.6       | 2.77E-37 | -1.4537771 | 0.015 | 0.327 | 4.56E-33 | 7  |
| Klf4.6      | 5.81E-37 | -1.667975  | 0.072 | 0.391 | 9.56E-33 | 7  |
| Mcl1.6      | 2.38E-36 | -1.124285  | 0.115 | 0.443 | 3.92E-32 | 7  |
| Spi1.6      | 6.00E-36 | -1.2146533 | 0.015 | 0.32  | 9.87E-32 | 7  |
| Jak1.3      | 8.46E-36 | 0.83733183 | 0.558 | 0.308 | 1.39E-31 | 7  |
| Junb.5      | 1.52E-35 | -0.699546  | 0.66  | 0.852 | 2.50E-31 | 7  |
| Ier3.5      | 3.10E-35 | -1.7085294 | 0.038 | 0.341 | 5.10E-31 | 7  |

|            |          |            |       |       |          |   |
|------------|----------|------------|-------|-------|----------|---|
| Pf4.7      | 3.80E-35 | -2.4969638 | 0.026 | 0.321 | 6.25E-31 | 7 |
| Ctsz.4     | 4.20E-35 | -1.1557165 | 0.061 | 0.368 | 6.90E-31 | 7 |
| Ly6e.5     | 5.51E-35 | -0.7544978 | 0.537 | 0.761 | 9.06E-31 | 7 |
| H2afz.6    | 3.64E-34 | 0.68432742 | 0.785 | 0.578 | 5.99E-30 | 7 |
| Ccl2.7     | 6.65E-34 | -2.2036245 | 0.008 | 0.295 | 1.09E-29 | 7 |
| Rinl       | 1.77E-33 | 0.69593522 | 0.251 | 0.077 | 2.90E-29 | 7 |
| Klf6.7     | 7.42E-33 | -1.0871048 | 0.243 | 0.545 | 1.22E-28 | 7 |
| Zfp36l1.5  | 1.50E-32 | -0.9392648 | 0.235 | 0.543 | 2.47E-28 | 7 |
| F13a1.6    | 1.69E-32 | -1.6837438 | 0.013 | 0.293 | 2.78E-28 | 7 |
| Cd68.6     | 5.90E-32 | -1.234123  | 0.01  | 0.286 | 9.70E-28 | 7 |
| S100a10.6  | 1.26E-31 | 0.577737   | 0.691 | 0.448 | 2.07E-27 | 7 |
| Gm2a.7     | 1.65E-31 | -1.2383196 | 0.023 | 0.3   | 2.72E-27 | 7 |
| Lgmn.6     | 2.76E-31 | -1.3662172 | 0.018 | 0.293 | 4.54E-27 | 7 |
| App.5      | 4.64E-31 | -1.1796916 | 0.015 | 0.287 | 7.64E-27 | 7 |
| Fcgrt.6    | 9.58E-31 | -1.3923971 | 0.005 | 0.27  | 1.58E-26 | 7 |
| Zfp36l2.3  | 1.25E-30 | 0.67032661 | 0.614 | 0.368 | 2.06E-26 | 7 |
| Cd81.6     | 6.22E-30 | -1.1824663 | 0.031 | 0.299 | 1.02E-25 | 7 |
| Clec10a.7  | 9.79E-30 | -1.4913765 | 0.003 | 0.258 | 1.61E-25 | 7 |
| Cd14.6     | 1.12E-29 | -1.4908806 | 0.013 | 0.273 | 1.84E-25 | 7 |
| B4galnt1.1 | 1.26E-29 | 0.79839492 | 0.343 | 0.146 | 2.07E-25 | 7 |
| Thy1.1     | 1.99E-29 | 0.53665747 | 0.312 | 0.115 | 3.27E-25 | 7 |
| Nr4a1.3    | 2.81E-29 | -0.9120901 | 0.228 | 0.52  | 4.63E-25 | 7 |
| Rgs10.6    | 3.76E-29 | -1.0944339 | 0.026 | 0.289 | 6.19E-25 | 7 |
| Cxcl2.7    | 7.43E-29 | -2.3363807 | 0.01  | 0.263 | 1.22E-24 | 7 |
| Mafb.6     | 1.15E-28 | -1.6662007 | 0.02  | 0.276 | 1.89E-24 | 7 |
| Npc2.6     | 1.83E-28 | -0.8275844 | 0.248 | 0.526 | 3.01E-24 | 7 |
| Tmem176a.5 | 3.00E-28 | -1.0798336 | 0.074 | 0.347 | 4.93E-24 | 7 |
| Kctd12.6   | 3.00E-28 | -1.0504298 | 0.11  | 0.384 | 4.94E-24 | 7 |
| Anxa5.6    | 4.33E-28 | -1.0192788 | 0.087 | 0.356 | 7.13E-24 | 7 |
| Mgl2.7     | 5.03E-28 | -1.3721    | 0.01  | 0.258 | 8.28E-24 | 7 |
| Rassf4.5   | 5.22E-28 | -1.0446543 | 0.01  | 0.258 | 8.59E-24 | 7 |
| Lamp1.7    | 6.74E-28 | -0.9853789 | 0.153 | 0.428 | 1.11E-23 | 7 |
| Fcgr2b.5   | 1.36E-27 | -1.0041237 | 0.033 | 0.291 | 2.23E-23 | 7 |
| Cfl1       | 2.33E-27 | 0.47909614 | 0.847 | 0.786 | 3.83E-23 | 7 |
| Jund.6     | 4.00E-27 | -0.7630979 | 0.465 | 0.694 | 6.58E-23 | 7 |
| Ppia.2     | 5.54E-27 | 0.36216363 | 0.923 | 0.887 | 9.11E-23 | 7 |
| Il1b.6     | 2.76E-26 | -1.857215  | 0.018 | 0.256 | 4.54E-22 | 7 |
| Ywhaq      | 4.14E-26 | 0.73355334 | 0.402 | 0.202 | 6.80E-22 | 7 |
| Plbd1.5    | 4.86E-26 | -1.1957788 | 0.018 | 0.252 | 8.00E-22 | 7 |
| Erp29.4    | 1.81E-25 | -0.7980979 | 0.113 | 0.38  | 2.97E-21 | 7 |
| Cd79a.7    | 2.16E-25 | -1.8147726 | 0.028 | 0.263 | 3.56E-21 | 7 |
| Cbr2.7     | 1.26E-24 | -1.4370754 | 0.026 | 0.254 | 2.07E-20 | 7 |
| H2-Eb1     | 1.50E-57 | 0.42974373 | 0.85  | 0.673 | 2.47E-53 | 0 |

|            |          |            |       |       |          |    |
|------------|----------|------------|-------|-------|----------|----|
| Cnn2.3     | 7.29E-24 | 0.60708414 | 0.535 | 0.338 | 1.20E-19 | 7  |
| Rel.6      | 1.49E-23 | -0.9264047 | 0.056 | 0.292 | 2.44E-19 | 7  |
| Esyt1      | 1.58E-23 | 0.72236675 | 0.317 | 0.144 | 2.60E-19 | 7  |
| H2-Q6.5    | 9.18E-12 | 0.4229571  | 0.452 | 0.155 | 1.51E-07 | 16 |
| Nrros.7    | 3.88E-23 | -0.8400495 | 0.059 | 0.296 | 6.38E-19 | 7  |
| Actb.3     | 6.56E-23 | 0.30095421 | 0.995 | 0.993 | 1.08E-18 | 7  |
| Anxa6.1    | 1.09E-22 | 0.73522065 | 0.358 | 0.18  | 1.79E-18 | 7  |
| Myl12a.2   | 1.24E-22 | 0.65398819 | 0.56  | 0.384 | 2.05E-18 | 7  |
| Ets1.2     | 1.26E-22 | 0.55701658 | 0.373 | 0.175 | 2.07E-18 | 7  |
| Hexa.5     | 1.79E-22 | -0.9255527 | 0.072 | 0.303 | 2.95E-18 | 7  |
| Ighm.5     | 1.88E-22 | -1.4669597 | 0.182 | 0.427 | 3.09E-18 | 7  |
| Fxyd5.7    | 3.62E-22 | 0.56936505 | 0.632 | 0.456 | 5.95E-18 | 7  |
| Lgals3.6   | 4.86E-22 | -0.9805868 | 0.128 | 0.361 | 7.99E-18 | 7  |
| Pim1.4     | 3.35E-21 | -0.6146277 | 0.21  | 0.462 | 5.51E-17 | 7  |
| Leprotl1.1 | 5.28E-21 | 0.6843657  | 0.294 | 0.135 | 8.69E-17 | 7  |
| Gadd45b.6  | 5.78E-21 | -0.9472348 | 0.049 | 0.261 | 9.50E-17 | 7  |
| Ninj1.6    | 5.86E-21 | -1.0973769 | 0.046 | 0.253 | 9.65E-17 | 7  |
| Cox8a      | 7.43E-21 | 0.42116501 | 0.806 | 0.683 | 1.22E-16 | 7  |
| Gimap6.3   | 2.16E-20 | 0.52735933 | 0.373 | 0.182 | 3.55E-16 | 7  |
| Mef2c.3    | 2.98E-20 | -0.9040784 | 0.046 | 0.252 | 4.90E-16 | 7  |
| Zyx.6      | 5.40E-20 | 0.66966151 | 0.43  | 0.254 | 8.89E-16 | 7  |
| Efhd2.5    | 2.27E-19 | 0.6200049  | 0.465 | 0.287 | 3.73E-15 | 7  |
| Tpm4.2     | 4.36E-19 | 0.6614179  | 0.407 | 0.235 | 7.18E-15 | 7  |
| Itm2b.6    | 5.46E-19 | -0.6981313 | 0.701 | 0.792 | 8.98E-15 | 7  |
| Vasp       | 9.96E-19 | 0.62613349 | 0.338 | 0.175 | 1.64E-14 | 7  |
| Shisa5.5   | 1.57E-18 | 0.4592431  | 0.621 | 0.442 | 2.58E-14 | 7  |
| Clic4.6    | 3.29E-18 | -0.8436364 | 0.066 | 0.261 | 5.42E-14 | 7  |
| Cd2.2      | 4.81E-18 | 0.54384915 | 0.258 | 0.114 | 7.91E-14 | 7  |
| Pde4b.6    | 9.73E-18 | -0.6023252 | 0.199 | 0.429 | 1.60E-13 | 7  |
| Ldha.3     | 9.75E-18 | 0.55498889 | 0.491 | 0.331 | 1.60E-13 | 7  |
| Ppp1r15a.6 | 1.01E-17 | -0.6769992 | 0.153 | 0.367 | 1.67E-13 | 7  |
| Serp1.4    | 1.36E-17 | -0.7107462 | 0.174 | 0.386 | 2.23E-13 | 7  |
| Nfkbid.4   | 2.09E-17 | -0.7076921 | 0.061 | 0.253 | 3.43E-13 | 7  |
| Atp6v0c.6  | 2.51E-17 | -0.6377233 | 0.207 | 0.435 | 4.12E-13 | 7  |
| Napsa.7    | 3.83E-17 | -0.8598634 | 0.084 | 0.274 | 6.31E-13 | 7  |
| Sh3bgrl3.3 | 7.37E-17 | 0.3302183  | 0.829 | 0.743 | 1.21E-12 | 7  |
| Ptpn18.2   | 1.31E-16 | 0.42815956 | 0.701 | 0.609 | 2.15E-12 | 7  |
| Prex1      | 1.53E-16 | 0.69542038 | 0.284 | 0.147 | 2.52E-12 | 7  |
| Dad1.3     | 1.58E-16 | 0.58668667 | 0.473 | 0.318 | 2.59E-12 | 7  |
| Ablim1.2   | 1.80E-16 | 0.51967517 | 0.261 | 0.121 | 2.96E-12 | 7  |
| Fgl2       | 1.96E-16 | 0.71509782 | 0.251 | 0.121 | 3.22E-12 | 7  |
| Adgre5.4   | 2.28E-16 | 0.64871549 | 0.399 | 0.233 | 3.75E-12 | 7  |
| Sat1.7     | 2.66E-16 | -0.6756712 | 0.141 | 0.35  | 4.37E-12 | 7  |

|            |          |            |       |       |          |   |
|------------|----------|------------|-------|-------|----------|---|
| Bri3.6     | 2.75E-16 | -0.6649453 | 0.182 | 0.381 | 4.52E-12 | 7 |
| Gabarap.3  | 2.81E-16 | -0.457018  | 0.361 | 0.576 | 4.62E-12 | 7 |
| Rpl27.3    | 6.91E-16 | 0.3096876  | 0.849 | 0.828 | 1.14E-11 | 7 |
| Klf2.5     | 1.10E-15 | -0.5897841 | 0.404 | 0.605 | 1.82E-11 | 7 |
| Eif5a.3    | 3.30E-15 | 0.52306184 | 0.552 | 0.417 | 5.44E-11 | 7 |
| Rpl13a.6   | 5.43E-15 | 0.25787822 | 0.867 | 0.81  | 8.94E-11 | 7 |
| Atp6v0b.6  | 5.55E-15 | -0.5191615 | 0.169 | 0.37  | 9.12E-11 | 7 |
| Cltc.6     | 7.65E-15 | -0.6664256 | 0.159 | 0.34  | 1.26E-10 | 7 |
| Ctsa.6     | 1.75E-14 | -0.6076216 | 0.113 | 0.293 | 2.88E-10 | 7 |
| Serf2.5    | 1.83E-14 | 0.31590983 | 0.836 | 0.758 | 3.00E-10 | 7 |
| Ndufb7     | 2.85E-14 | 0.56751269 | 0.404 | 0.256 | 4.68E-10 | 7 |
| Dnajc15    | 2.85E-14 | 0.58086333 | 0.266 | 0.139 | 4.69E-10 | 7 |
| Kdm6b.6    | 3.08E-14 | -0.6213489 | 0.136 | 0.321 | 5.07E-10 | 7 |
| Ier5.5     | 4.03E-14 | -0.5061963 | 0.176 | 0.381 | 6.63E-10 | 7 |
| Zeb2.6     | 4.37E-14 | -0.5586632 | 0.118 | 0.305 | 7.18E-10 | 7 |
| Bin2.2     | 4.84E-14 | 0.59640604 | 0.261 | 0.135 | 7.96E-10 | 7 |
| Scand1.1   | 5.14E-14 | -0.455633  | 0.153 | 0.346 | 8.45E-10 | 7 |
| Socs3.7    | 5.46E-14 | -0.7346866 | 0.118 | 0.287 | 8.99E-10 | 7 |
| Capg.4     | 6.25E-14 | -0.7196511 | 0.1   | 0.266 | 1.03E-09 | 7 |
| Ppp1r12a.1 | 7.78E-14 | 0.57410821 | 0.338 | 0.201 | 1.28E-09 | 7 |
| Hmgb2.3    | 1.03E-13 | 0.45869162 | 0.394 | 0.243 | 1.69E-09 | 7 |
| B2m.3      | 1.18E-13 | 0.28674686 | 0.841 | 0.806 | 1.95E-09 | 7 |
| Arhgdib.5  | 1.50E-13 | 0.39660693 | 0.701 | 0.59  | 2.46E-09 | 7 |
| Rnaset2b   | 1.50E-13 | 0.5758544  | 0.353 | 0.212 | 2.47E-09 | 7 |
| Syngr2.5   | 1.78E-13 | -0.5927039 | 0.09  | 0.256 | 2.92E-09 | 7 |
| Zfand5.5   | 2.37E-13 | -0.5704958 | 0.1   | 0.27  | 3.89E-09 | 7 |
| Slc9a3r1   | 2.48E-13 | 0.53656277 | 0.263 | 0.139 | 4.08E-09 | 7 |
| Rpl22l1.4  | 2.98E-13 | 0.44645935 | 0.555 | 0.437 | 4.90E-09 | 7 |
| Il2rg.5    | 4.19E-13 | 0.50252459 | 0.43  | 0.277 | 6.90E-09 | 7 |
| Gnas.2     | 4.51E-13 | 0.39520566 | 0.598 | 0.467 | 7.42E-09 | 7 |
| Itgb1.1    | 5.03E-13 | 0.64311377 | 0.368 | 0.238 | 8.28E-09 | 7 |
| Ehd4.6     | 5.15E-13 | -0.635839  | 0.107 | 0.275 | 8.48E-09 | 7 |
| Cyca.3     | 5.41E-13 | 0.62087952 | 0.373 | 0.239 | 8.91E-09 | 7 |
| Atp5g3     | 6.54E-13 | 0.47170936 | 0.568 | 0.452 | 1.08E-08 | 7 |
| S100a6.6   | 8.91E-13 | 0.31820631 | 0.831 | 0.748 | 1.47E-08 | 7 |
| S100a13.1  | 1.15E-12 | 0.54652257 | 0.361 | 0.225 | 1.90E-08 | 7 |
| Ly6d.6     | 1.30E-12 | -0.9313946 | 0.156 | 0.316 | 2.13E-08 | 7 |
| Ndufa4     | 3.26E-12 | 0.51380831 | 0.517 | 0.405 | 5.36E-08 | 7 |
| Reep5.2    | 3.47E-12 | 0.51258438 | 0.481 | 0.348 | 5.70E-08 | 7 |
| Clta.6     | 3.91E-12 | -0.462282  | 0.386 | 0.557 | 6.43E-08 | 7 |
| Itga4.2    | 8.61E-12 | 0.66881549 | 0.327 | 0.207 | 1.42E-07 | 7 |
| Elob       | 9.46E-12 | 0.43973059 | 0.55  | 0.43  | 1.56E-07 | 7 |
| H3f3a.5    | 1.28E-11 | -0.3818295 | 0.616 | 0.745 | 2.10E-07 | 7 |



|            |          |            |       |       |            |   |
|------------|----------|------------|-------|-------|------------|---|
| Atpif1.6   | 1.53E-11 | -0.5169561 | 0.161 | 0.323 | 2.51E-07   | 7 |
| Neat1.6    | 1.78E-11 | -0.6324036 | 0.171 | 0.335 | 2.92E-07   | 7 |
| Serbp1.4   | 1.81E-11 | 0.46623603 | 0.501 | 0.379 | 2.98E-07   | 7 |
| Epsti1     | 2.21E-11 | 0.47809727 | 0.304 | 0.183 | 3.63E-07   | 7 |
| Atp5h.2    | 2.57E-11 | 0.39371391 | 0.591 | 0.493 | 4.22E-07   | 7 |
| Ier2.6     | 2.62E-11 | -0.5411099 | 0.409 | 0.563 | 4.31E-07   | 7 |
| Dok2       | 2.82E-11 | 0.49273436 | 0.258 | 0.142 | 4.63E-07   | 7 |
| Ppp1r18.3  | 3.24E-11 | 0.54318793 | 0.379 | 0.253 | 5.33E-07   | 7 |
| Arcp2.4    | 3.47E-11 | 0.29407525 | 0.762 | 0.661 | 5.71E-07   | 7 |
| Gltp.3     | 4.61E-11 | -0.4294969 | 0.11  | 0.266 | 7.59E-07   | 7 |
| Polr2l     | 5.60E-11 | 0.51763097 | 0.261 | 0.149 | 9.21E-07   | 7 |
| Btg2.5     | 6.20E-11 | -0.3891619 | 0.535 | 0.678 | 1.02E-06   | 7 |
| Prr13.3    | 7.32E-11 | 0.46105101 | 0.389 | 0.261 | 1.20E-06   | 7 |
| Man2b1.5   | 9.40E-11 | -0.4574352 | 0.151 | 0.307 | 1.55E-06   | 7 |
| Cox5b.1    | 9.91E-11 | 0.45098341 | 0.545 | 0.429 | 1.63E-06   | 7 |
| Pabpc1.3   | 1.15E-10 | 0.36301818 | 0.701 | 0.63  | 1.89E-06   | 7 |
| Arhgef1.2  | 1.23E-10 | 0.41388724 | 0.338 | 0.208 | 2.03E-06   | 7 |
| Krtcap2.1  | 1.40E-10 | 0.45608594 | 0.422 | 0.29  | 2.30E-06   | 7 |
| Eno1.3     | 2.95E-10 | 0.43844081 | 0.514 | 0.407 | 4.86E-06   | 7 |
| Samhd1.1   | 3.13E-10 | -0.4781543 | 0.156 | 0.307 | 5.15E-06   | 7 |
| Rtn4.5     | 4.28E-10 | -0.4424557 | 0.115 | 0.258 | 7.04E-06   | 7 |
| S100a11.5  | 4.69E-10 | 0.35241942 | 0.517 | 0.392 | 7.71E-06   | 7 |
| Capzb.3    | 6.49E-10 | 0.37713571 | 0.57  | 0.468 | 1.07E-05   | 7 |
| Tma7.1     | 6.83E-10 | 0.44242951 | 0.445 | 0.331 | 1.12E-05   | 7 |
| Atox1.6    | 7.06E-10 | -0.4681843 | 0.322 | 0.463 | 1.16E-05   | 7 |
| Atp5j2.1   | 7.58E-10 | 0.41320181 | 0.522 | 0.419 | 1.25E-05   | 7 |
| Snrpg.2    | 8.63E-10 | 0.44869991 | 0.384 | 0.267 | 1.42E-05   | 7 |
| Atp5e.2    | 1.42E-09 | 0.32857002 | 0.678 | 0.62  | 2.34E-05   | 7 |
| Cstb.5     | 1.71E-09 | -0.5472723 | 0.133 | 0.264 | 2.82E-05   | 7 |
| Capza1     | 2.00E-09 | 0.48571421 | 0.274 | 0.168 | 3.29E-05   | 7 |
| Abracl.4   | 2.43E-09 | 0.5536354  | 0.358 | 0.256 | 4.00E-05   | 7 |
| Cd47.1     | 2.86E-09 | 0.41963397 | 0.453 | 0.344 | 4.70E-05   | 7 |
| Ctsd.7     | 4.38E-09 | 0.38136262 | 0.414 | 0.284 | 7.21E-05   | 7 |
| Ccnl1.5    | 4.57E-09 | -0.3957636 | 0.166 | 0.313 | 7.52E-05   | 7 |
| Ubc.5      | 4.67E-09 | -0.4215981 | 0.404 | 0.548 | 7.69E-05   | 7 |
| Cebpb.7    | 5.23E-09 | -0.5709871 | 0.202 | 0.336 | 8.61E-05   | 7 |
| Sub1.4     | 6.64E-09 | 0.39815473 | 0.547 | 0.459 | 0.00010919 | 7 |
| Gdi2.2     | 9.18E-09 | -0.3671086 | 0.238 | 0.382 | 0.00015103 | 7 |
| Sptbn1     | 9.87E-09 | 0.46616147 | 0.258 | 0.157 | 0.00016242 | 7 |
| Bhlhe40.1  | 1.55E-08 | 0.43386944 | 0.281 | 0.179 | 0.00025453 | 7 |
| Arhgap45.4 | 1.66E-08 | 0.42078802 | 0.422 | 0.309 | 0.00027329 | 7 |
| Dock2.2    | 1.75E-08 | 0.44610868 | 0.348 | 0.246 | 0.00028706 | 7 |
| Ccr2.2     | 1.97E-08 | 0.35939397 | 0.309 | 0.196 | 0.00032454 | 7 |

|            |          |            |       |       |            |    |
|------------|----------|------------|-------|-------|------------|----|
| Dennd4a.4  | 2.03E-08 | 0.4549164  | 0.345 | 0.238 | 0.00033325 | 7  |
| Atp2b1.7   | 2.24E-08 | -0.3697885 | 0.21  | 0.354 | 0.00036866 | 7  |
| Rps19.5    | 2.93E-08 | -0.2515792 | 0.859 | 0.937 | 0.00048184 | 7  |
| Prkar1a.1  | 2.99E-08 | 0.42908954 | 0.327 | 0.226 | 0.00049182 | 7  |
| Oaz1       | 3.06E-08 | 0.25739332 | 0.798 | 0.774 | 0.00050292 | 7  |
| Mbnl1.2    | 3.07E-08 | 0.42456233 | 0.435 | 0.335 | 0.00050539 | 7  |
| Atp5d.2    | 3.28E-08 | 0.36278838 | 0.519 | 0.434 | 0.0005396  | 7  |
| Nr4a2.2    | 3.98E-08 | 0.34379083 | 0.304 | 0.196 | 0.00065438 | 7  |
| Crip1.5    | 3.99E-08 | -0.5708613 | 0.68  | 0.722 | 0.00065594 | 7  |
| Sumo2.1    | 4.16E-08 | 0.3812965  | 0.496 | 0.407 | 0.00068455 | 7  |
| Lsp1.6     | 4.62E-08 | -0.5191658 | 0.281 | 0.402 | 0.00075973 | 7  |
| Cap1.1     | 5.31E-08 | 0.496324   | 0.302 | 0.205 | 0.00087412 | 7  |
| H2-DMb1.15 | 3.22E-09 | 0.4086531  | 0.796 | 0.325 | 5.29E-05   | 17 |
| Neur13     | 6.13E-08 | 0.43745265 | 0.276 | 0.177 | 0.00100892 | 7  |
| Vamp8.6    | 6.28E-08 | -0.3159499 | 0.21  | 0.349 | 0.00103368 | 7  |
| Ddx5.2     | 6.60E-08 | -0.2610952 | 0.563 | 0.71  | 0.00108589 | 7  |
| Ran.3      | 7.33E-08 | 0.3742973  | 0.394 | 0.294 | 0.00120625 | 7  |
| Tspo.3     | 8.09E-08 | 0.33423074 | 0.522 | 0.418 | 0.0013314  | 7  |
| Serinc3.7  | 8.70E-08 | -0.387552  | 0.228 | 0.364 | 0.00143034 | 7  |
| Ppp1ca.3   | 9.57E-08 | 0.40359726 | 0.46  | 0.372 | 0.00157362 | 7  |
| Ubald2.1   | 1.26E-07 | 0.42992115 | 0.304 | 0.21  | 0.00206695 | 7  |
| Edf1.1     | 1.27E-07 | 0.43920425 | 0.427 | 0.345 | 0.00208904 | 7  |
| Nap1l1.3   | 1.40E-07 | -0.4135776 | 0.148 | 0.267 | 0.00230979 | 7  |
| Plekhj1    | 1.42E-07 | 0.41015092 | 0.271 | 0.177 | 0.00233218 | 7  |
| Ankrd44    | 1.48E-07 | 0.46335638 | 0.251 | 0.159 | 0.00242728 | 7  |
| Ube2i.1    | 1.73E-07 | 0.38755289 | 0.33  | 0.23  | 0.0028399  | 7  |
| Laptm4a.4  | 2.17E-07 | -0.3278486 | 0.153 | 0.278 | 0.00356839 | 7  |
| Ddx3x.4    | 2.94E-07 | -0.3305521 | 0.151 | 0.274 | 0.00483924 | 7  |
| Ncl.5      | 3.42E-07 | 0.43601874 | 0.448 | 0.371 | 0.00562544 | 7  |
| Cox7a2l    | 4.44E-07 | -0.2941953 | 0.24  | 0.369 | 0.00730984 | 7  |
| Akr1a1.5   | 5.10E-07 | -0.3097914 | 0.23  | 0.359 | 0.00839252 | 7  |
| Diaph1.1   | 5.15E-07 | 0.42334275 | 0.266 | 0.176 | 0.00847062 | 7  |
| Pycard.1   | 6.13E-07 | 0.44924759 | 0.289 | 0.2   | 0.01007849 | 7  |
| Rbm3.3     | 6.92E-07 | 0.28786645 | 0.598 | 0.55  | 0.01137752 | 7  |
| Psme1.4    | 9.65E-07 | 0.32698339 | 0.494 | 0.4   | 0.01586758 | 7  |
| Tln1.2     | 1.06E-06 | 0.36182774 | 0.499 | 0.424 | 0.0174406  | 7  |
| Rrbp1.5    | 1.23E-06 | -0.2709174 | 0.225 | 0.355 | 0.02028977 | 7  |
| Ywhab.1    | 1.24E-06 | 0.45445331 | 0.315 | 0.227 | 0.02043967 | 7  |
| Preli1.1   | 1.27E-06 | 0.39430742 | 0.391 | 0.308 | 0.02083161 | 7  |
| Myh9.3     | 1.28E-06 | 0.3516493  | 0.565 | 0.499 | 0.02098455 | 7  |
| Psmb10     | 1.44E-06 | 0.44103295 | 0.274 | 0.192 | 0.02372155 | 7  |
| H2-Oa.2    | 1.36E-19 | 0.39056137 | 0.303 | 0.135 | 2.24E-15   | 6  |
| Rbx1       | 1.65E-06 | 0.39948152 | 0.379 | 0.293 | 0.02708568 | 7  |

|            |            |            |       |       |            |   |
|------------|------------|------------|-------|-------|------------|---|
| Hmgb1.2    | 2.32E-06   | 0.29743269 | 0.494 | 0.415 | 0.03819307 | 7 |
| Txn1.2     | 2.52E-06   | 0.31048208 | 0.343 | 0.246 | 0.04139958 | 7 |
| Sap18.1    | 3.69E-06   | 0.38116234 | 0.348 | 0.259 | 0.0606214  | 7 |
| Gstm1.5    | 4.02E-06   | -0.2928995 | 0.532 | 0.652 | 0.06614652 | 7 |
| Tmem258    | 4.94E-06   | 0.3746818  | 0.332 | 0.249 | 0.08127467 | 7 |
| Wnk1.3     | 4.95E-06   | -0.2857408 | 0.156 | 0.265 | 0.0814692  | 7 |
| Clic1.2    | 5.27E-06   | 0.26159593 | 0.578 | 0.5   | 0.08671156 | 7 |
| Tmed10.4   | 5.74E-06   | -0.31781   | 0.184 | 0.29  | 0.09436119 | 7 |
| Ndufa13.1  | 6.09E-06   | 0.31389086 | 0.483 | 0.397 | 0.10015354 | 7 |
| Tuba1b.2   | 6.56E-06   | -0.3358573 | 0.212 | 0.326 | 0.10784254 | 7 |
| Snx5.7     | 8.84E-06   | -0.3200155 | 0.217 | 0.322 | 0.14544806 | 7 |
| Arcp1b.5   | 9.59E-06   | 0.26893163 | 0.655 | 0.621 | 0.15774481 | 7 |
| Psma2.1    | 9.77E-06   | 0.3188424  | 0.307 | 0.224 | 0.16070577 | 7 |
| Raly       | 9.96E-06   | 0.4191668  | 0.302 | 0.227 | 0.16385509 | 7 |
| Cytip.5    | 1.11E-05   | -0.3402369 | 0.225 | 0.333 | 0.1821136  | 7 |
| Vps28.1    | 1.56E-05   | 0.35178811 | 0.271 | 0.192 | 0.25671067 | 7 |
| Atp5g1     | 2.72E-05   | 0.36138828 | 0.292 | 0.217 | 0.44676629 | 7 |
| Calm2.4    | 2.96E-05   | 0.32328209 | 0.458 | 0.383 | 0.48710391 | 7 |
| Snrpe.2    | 4.02E-05   | 0.31119761 | 0.379 | 0.303 | 0.66167453 | 7 |
| Ppp4c      | 4.54E-05   | 0.35960454 | 0.281 | 0.208 | 0.74622603 | 7 |
| Ostf1.2    | 4.85E-05   | 0.41235516 | 0.376 | 0.311 | 0.797168   | 7 |
| Wdr1       | 5.39E-05   | 0.36901572 | 0.33  | 0.259 | 0.88616191 | 7 |
| Ppp1cc.1   | 5.58E-05   | 0.28424455 | 0.284 | 0.205 | 0.91811158 | 7 |
| Flna.5     | 6.09E-05   | 0.37552751 | 0.366 | 0.295 | 1          | 7 |
| Bag1       | 6.12E-05   | 0.34274017 | 0.279 | 0.206 | 1          | 7 |
| Sp100.3    | 6.51E-05   | 0.3158617  | 0.289 | 0.215 | 1          | 7 |
| Eif3c      | 6.97E-05   | 0.31978452 | 0.33  | 0.254 | 1          | 7 |
| Vim.6      | 7.14E-05   | -0.3752596 | 0.581 | 0.624 | 1          | 7 |
| Cox17      | 8.02E-05   | 0.38159279 | 0.276 | 0.204 | 1          | 7 |
| Psmb5.1    | 0.00010158 | 0.31514502 | 0.274 | 0.203 | 1          | 7 |
| Gpsm3      | 0.00011576 | 0.36806878 | 0.274 | 0.206 | 1          | 7 |
| Gabarapl2  | 0.00015605 | 0.38843122 | 0.276 | 0.213 | 1          | 7 |
| Trir       | 0.00017742 | 0.32406942 | 0.292 | 0.222 | 1          | 7 |
| Erh.1      | 0.00017876 | 0.36590824 | 0.315 | 0.255 | 1          | 7 |
| Psmb3.3    | 0.00018314 | 0.36394489 | 0.332 | 0.266 | 1          | 7 |
| Fosl2.2    | 0.00023045 | 0.33760303 | 0.279 | 0.211 | 1          | 7 |
| Sri.2      | 0.0002524  | 0.39011952 | 0.309 | 0.249 | 1          | 7 |
| Cox7a2     | 0.0003676  | 0.25842276 | 0.404 | 0.341 | 1          | 7 |
| Mrps24     | 0.00038569 | 0.31072502 | 0.281 | 0.217 | 1          | 7 |
| H2afj.1    | 0.00044602 | 0.3221864  | 0.427 | 0.373 | 1          | 7 |
| Srp9       | 0.00044973 | 0.28187767 | 0.363 | 0.301 | 1          | 7 |
| AY036118.4 | 0.00056    | -0.376035  | 0.696 | 0.789 | 1          | 7 |
| Lcp1.1     | 0.00060565 | 0.25995494 | 0.552 | 0.533 | 1          | 7 |

|               |            |            |       |       |           |   |
|---------------|------------|------------|-------|-------|-----------|---|
| Atp5a1.1      | 0.00063847 | 0.31129955 | 0.419 | 0.37  | 1         | 7 |
| Atp5o.1.2     | 0.00068084 | 0.30457271 | 0.304 | 0.242 | 1         | 7 |
| Atp5j         | 0.00077249 | 0.2596162  | 0.427 | 0.379 | 1         | 7 |
| Anp32b.2      | 0.00118152 | 0.30332905 | 0.353 | 0.304 | 1         | 7 |
| Psemb1.3      | 0.00126449 | 0.26475955 | 0.363 | 0.309 | 1         | 7 |
| Cox5a.1       | 0.00147298 | 0.25823836 | 0.419 | 0.378 | 1         | 7 |
| 1810058I24Ril | 0.00148961 | 0.30353201 | 0.253 | 0.195 | 1         | 7 |
| Mrpl33.1      | 0.00161678 | 0.2821816  | 0.274 | 0.216 | 1         | 7 |
| Cox7b         | 0.00177332 | 0.31137345 | 0.34  | 0.295 | 1         | 7 |
| Ndufa1        | 0.00177651 | 0.291783   | 0.256 | 0.2   | 1         | 7 |
| Anp32a.1      | 0.00183635 | 0.25807941 | 0.353 | 0.294 | 1         | 7 |
| Tomm22        | 0.00202202 | 0.33903541 | 0.261 | 0.208 | 1         | 7 |
| Ndfip1.2      | 0.00241881 | 0.30499446 | 0.35  | 0.295 | 1         | 7 |
| Stat3         | 0.00310115 | 0.26115339 | 0.297 | 0.243 | 1         | 7 |
| Ywhah.3       | 0.00316013 | 0.33031842 | 0.307 | 0.261 | 1         | 7 |
| Arf1          | 0.00352839 | 0.322955   | 0.373 | 0.328 | 1         | 7 |
| Set           | 0.00539134 | 0.3127597  | 0.274 | 0.227 | 1         | 7 |
| Ndufb11.1     | 0.00684378 | 0.28163304 | 0.371 | 0.336 | 1         | 7 |
| Hnrnpl        | 0.00739607 | 0.26940866 | 0.253 | 0.204 | 1         | 7 |
| Uqcrcq.1      | 0.00952938 | 0.27065708 | 0.368 | 0.334 | 1         | 7 |
| Lyz1          | 0          | 2.43370661 | 0.448 | 0.025 | 0         | 8 |
| Fn1.1         | 0          | 2.24109915 | 0.791 | 0.049 | 0         | 8 |
| Ear2.2        | 0          | 1.95910017 | 0.69  | 0.06  | 0         | 8 |
| Retnla.4      | 4.14E-243  | 2.14040464 | 0.893 | 0.21  | 6.81E-239 | 8 |
| Lpl           | 1.70E-189  | 1.57736547 | 0.525 | 0.074 | 2.80E-185 | 8 |
| Tnip3.1       | 8.06E-155  | 1.3144262  | 0.571 | 0.105 | 1.33E-150 | 8 |
| Ccl6.8        | 8.77E-149  | 1.30523526 | 0.945 | 0.387 | 1.44E-144 | 8 |
| Crip1.6       | 1.48E-147  | 1.24271921 | 0.992 | 0.707 | 2.44E-143 | 8 |
| Ccr2.3        | 3.26E-139  | 1.27855378 | 0.695 | 0.178 | 5.36E-135 | 8 |
| Ccl9.6        | 2.88E-129  | 1.22436399 | 0.725 | 0.21  | 4.74E-125 | 8 |
| Psap.6        | 2.26E-102  | 0.927622   | 0.984 | 0.661 | 3.71E-98  | 8 |
| Cxcl2.8       | 1.51E-97   | 0.9870185  | 0.717 | 0.228 | 2.48E-93  | 8 |
| Gpx1.8        | 3.69E-97   | 0.89344648 | 0.992 | 0.698 | 6.07E-93  | 8 |
| Gda.1         | 6.29E-94   | 1.00322895 | 0.467 | 0.106 | 1.04E-89  | 8 |
| Ly6e.6        | 2.89E-93   | -1.6644275 | 0.264 | 0.774 | 4.76E-89  | 8 |
| Il1b.7        | 2.12E-91   | 0.9559821  | 0.692 | 0.223 | 3.49E-87  | 8 |
| Tmsb4x.5      | 1.89E-85   | 0.52525619 | 1     | 0.993 | 3.11E-81  | 8 |
| Dok2.1        | 4.93E-76   | 0.88175082 | 0.484 | 0.131 | 8.11E-72  | 8 |
| Lyz2.8        | 1.11E-73   | 0.69023277 | 0.981 | 0.534 | 1.82E-69  | 8 |
| S100a6.7      | 1.50E-72   | 0.73499641 | 0.953 | 0.743 | 2.46E-68  | 8 |
| Fcrls.2       | 4.75E-72   | 0.87994998 | 0.505 | 0.145 | 7.81E-68  | 8 |
| Mcub          | 8.66E-70   | 0.90417878 | 0.368 | 0.088 | 1.42E-65  | 8 |
| Lgals3.7      | 2.53E-68   | 0.89597896 | 0.742 | 0.331 | 4.17E-64  | 8 |

|            |            |            |       |       |          |    |
|------------|------------|------------|-------|-------|----------|----|
| Unc119     | 5.01E-67   | 0.88452189 | 0.374 | 0.093 | 8.23E-63 | 8  |
| mt-Atp8.5  | 9.88E-66   | -0.7348995 | 0.802 | 0.935 | 1.63E-61 | 8  |
| Anxa2.8    | 2.08E-65   | 0.88617799 | 0.648 | 0.257 | 3.43E-61 | 8  |
| Batf3      | 3.20E-63   | 0.93286304 | 0.363 | 0.093 | 5.26E-59 | 8  |
| Ahnak.6    | 2.26E-61   | 0.79115714 | 0.879 | 0.53  | 3.71E-57 | 8  |
| S100a4.2   | 8.26E-60   | 0.8679025  | 0.497 | 0.166 | 1.36E-55 | 8  |
| H2-Ke6     | 9.57E-05   | 0.37911802 | 0.333 | 0.09  | 1        | 20 |
| Alox5ap.8  | 1.24E-56   | 0.73630207 | 0.775 | 0.379 | 2.03E-52 | 8  |
| Ifitm6.2   | 8.67E-56   | 0.82877037 | 0.393 | 0.114 | 1.43E-51 | 8  |
| Pltp.8     | 8.30E-53   | 0.66281333 | 0.725 | 0.318 | 1.36E-48 | 8  |
| Olfm1.1    | 8.87E-52   | 0.73322097 | 0.346 | 0.095 | 1.46E-47 | 8  |
| mt-Nd4l.5  | 1.25E-50   | -0.6714195 | 0.755 | 0.908 | 2.05E-46 | 8  |
| Dbi.4      | 3.44E-48   | 0.86448261 | 0.599 | 0.277 | 5.66E-44 | 8  |
| H2-Ab1     | 3.05E-58   | 0.36793827 | 0.878 | 0.667 | 5.03E-54 | 0  |
| Smdt1.4    | 3.69E-46   | 0.77903904 | 0.662 | 0.338 | 6.07E-42 | 8  |
| H2-D1.12   | 0.00327791 | 0.36448309 | 0.966 | 0.89  | 1        | 19 |
| Capg.5     | 6.55E-44   | 0.70720439 | 0.569 | 0.243 | 1.08E-39 | 8  |
| Actg1.4    | 4.43E-43   | 0.40929647 | 0.992 | 0.897 | 7.29E-39 | 8  |
| Metrl.1    | 8.86E-43   | 0.72745081 | 0.31  | 0.09  | 1.46E-38 | 8  |
| Naaa       | 4.68E-42   | 0.71636819 | 0.354 | 0.113 | 7.70E-38 | 8  |
| Lsp1.7     | 1.39E-41   | 0.63298901 | 0.739 | 0.38  | 2.28E-37 | 8  |
| Clec4b1.1  | 2.30E-41   | 0.73331671 | 0.297 | 0.085 | 3.79E-37 | 8  |
| Phlda1     | 2.69E-41   | 0.87942383 | 0.404 | 0.146 | 4.43E-37 | 8  |
| Sem1.5     | 5.48E-41   | 0.62985392 | 0.808 | 0.537 | 9.02E-37 | 8  |
| Areg       | 5.38E-40   | 0.71761857 | 0.253 | 0.066 | 8.86E-36 | 8  |
| Arpc1b.6   | 1.03E-39   | 0.57689944 | 0.843 | 0.612 | 1.69E-35 | 8  |
| Slamf9.1   | 2.92E-38   | 0.69892924 | 0.319 | 0.102 | 4.81E-34 | 8  |
| S100a10.7  | 2.98E-38   | 0.65738201 | 0.753 | 0.446 | 4.90E-34 | 8  |
| Gm2a.8     | 3.93E-38   | 0.65783323 | 0.582 | 0.272 | 6.46E-34 | 8  |
| Mt1.8      | 7.43E-38   | 0.43580281 | 0.772 | 0.399 | 1.22E-33 | 8  |
| H2-D1.8    | 5.10E-09   | 0.36433803 | 0.979 | 0.889 | 8.39E-05 | 15 |
| Ifi27l2a.7 | 4.79E-37   | 0.55313153 | 0.717 | 0.387 | 7.87E-33 | 8  |
| Rps27l.3   | 4.85E-37   | 0.76299539 | 0.577 | 0.294 | 7.98E-33 | 8  |
| Serf2.6    | 3.42E-36   | 0.4963458  | 0.92  | 0.754 | 5.62E-32 | 8  |
| Sdc3.1     | 3.74E-36   | 0.63465969 | 0.412 | 0.159 | 6.16E-32 | 8  |
| Pitpna.3   | 6.23E-36   | 0.68083579 | 0.503 | 0.225 | 1.02E-31 | 8  |
| Cotl1.3    | 1.89E-35   | 0.71067638 | 0.629 | 0.349 | 3.12E-31 | 8  |
| Atp5e.3    | 3.89E-35   | 0.57729483 | 0.827 | 0.613 | 6.40E-31 | 8  |
| Eef1a1.5   | 2.83E-34   | -0.4228505 | 0.975 | 0.98  | 4.66E-30 | 8  |
| Zyx.7      | 4.05E-34   | 0.6180362  | 0.536 | 0.25  | 6.67E-30 | 8  |
| Lilr4b     | 5.33E-33   | 0.60237167 | 0.294 | 0.096 | 8.76E-29 | 8  |
| Cfp.7      | 5.78E-33   | 0.57411231 | 0.591 | 0.298 | 9.51E-29 | 8  |
| Cyba.3     | 1.29E-31   | 0.47625823 | 0.865 | 0.71  | 2.12E-27 | 8  |

|            |          |            |       |       |          |   |
|------------|----------|------------|-------|-------|----------|---|
| Colgalt1   | 1.69E-31 | 0.61828702 | 0.332 | 0.121 | 2.78E-27 | 8 |
| H3f3b.2    | 2.98E-31 | -0.556133  | 0.805 | 0.906 | 4.90E-27 | 8 |
| Cdkn1a.3   | 4.65E-31 | 0.59765684 | 0.486 | 0.219 | 7.64E-27 | 8 |
| Gm10076.2  | 4.95E-30 | 0.3976508  | 0.992 | 0.951 | 8.14E-26 | 8 |
| Csf2ra.2   | 1.65E-29 | 0.58968118 | 0.346 | 0.135 | 2.72E-25 | 8 |
| Efhd2.6    | 1.74E-29 | 0.59319801 | 0.56  | 0.283 | 2.86E-25 | 8 |
| Vim.7      | 3.57E-29 | 0.48135089 | 0.863 | 0.61  | 5.87E-25 | 8 |
| Lmna.2     | 4.47E-29 | 0.58869008 | 0.448 | 0.2   | 7.35E-25 | 8 |
| Myl6.4     | 1.06E-28 | 0.48034208 | 0.841 | 0.644 | 1.74E-24 | 8 |
| Flna.6     | 3.00E-28 | 0.61991572 | 0.544 | 0.286 | 4.94E-24 | 8 |
| mt-Co3.3   | 5.50E-28 | -0.3250654 | 0.978 | 0.975 | 9.05E-24 | 8 |
| Bcl2a1b.1  | 6.86E-28 | 0.55468139 | 0.423 | 0.188 | 1.13E-23 | 8 |
| Ifitm3.8   | 8.12E-28 | 0.31716598 | 0.816 | 0.475 | 1.34E-23 | 8 |
| Rbpj.3     | 1.55E-27 | 0.60327705 | 0.385 | 0.166 | 2.55E-23 | 8 |
| Nfkbia.6   | 6.15E-27 | 0.35352293 | 0.824 | 0.505 | 1.01E-22 | 8 |
| Atox1.7    | 7.45E-27 | 0.4875578  | 0.72  | 0.443 | 1.23E-22 | 8 |
| Ctsd.8     | 9.91E-27 | 0.50121445 | 0.547 | 0.278 | 1.63E-22 | 8 |
| Fxyd5.8    | 4.07E-26 | 0.47823207 | 0.736 | 0.452 | 6.69E-22 | 8 |
| Tyrobp.8   | 1.02E-25 | 0.35623265 | 0.918 | 0.593 | 1.68E-21 | 8 |
| Zeb2.7     | 1.35E-25 | 0.49482812 | 0.547 | 0.283 | 2.22E-21 | 8 |
| Rpl9-ps6.5 | 1.47E-25 | -0.4729003 | 0.854 | 0.908 | 2.41E-21 | 8 |
| Icam1.2    | 3.17E-25 | 0.57241023 | 0.382 | 0.166 | 5.21E-21 | 8 |
| Prkcd.1    | 5.68E-25 | 0.57639794 | 0.385 | 0.174 | 9.35E-21 | 8 |
| Sept9.1    | 4.61E-24 | 0.58466536 | 0.346 | 0.149 | 7.59E-20 | 8 |
| Tagln2.4   | 9.84E-24 | 0.47394606 | 0.728 | 0.478 | 1.62E-19 | 8 |
| Cd14.7     | 1.14E-23 | 0.42391988 | 0.505 | 0.249 | 1.88E-19 | 8 |
| Cd44.2     | 1.33E-23 | 0.59387033 | 0.39  | 0.183 | 2.20E-19 | 8 |
| Ubb.2      | 5.38E-23 | -0.4256495 | 0.769 | 0.88  | 8.84E-19 | 8 |
| Zfp36l1.6  | 8.11E-23 | -0.8038589 | 0.299 | 0.539 | 1.33E-18 | 8 |
| Mcl1.7     | 9.01E-23 | 0.47583334 | 0.657 | 0.416 | 1.48E-18 | 8 |
| Cebpb.8    | 4.75E-22 | 0.37019412 | 0.588 | 0.317 | 7.82E-18 | 8 |
| Adam15     | 7.28E-22 | 0.50644361 | 0.255 | 0.097 | 1.20E-17 | 8 |
| Nfil3.1    | 2.50E-21 | 0.51997371 | 0.255 | 0.1   | 4.11E-17 | 8 |
| Pid1.3     | 3.49E-21 | 0.52608389 | 0.308 | 0.132 | 5.73E-17 | 8 |
| Fgfr1.2    | 6.29E-21 | 0.49296406 | 0.258 | 0.101 | 1.04E-16 | 8 |
| Rps27.6    | 1.15E-20 | -0.4624774 | 0.849 | 0.904 | 1.88E-16 | 8 |
| Bcl2a1d.1  | 1.26E-20 | 0.46489152 | 0.335 | 0.151 | 2.08E-16 | 8 |
| B2m.4      | 1.49E-20 | -0.4589933 | 0.706 | 0.812 | 2.45E-16 | 8 |
| Prcp.1     | 1.68E-20 | 0.47961445 | 0.376 | 0.179 | 2.76E-16 | 8 |
| Id2.1      | 3.64E-20 | 0.48868936 | 0.412 | 0.205 | 5.99E-16 | 8 |
| Apoe.7     | 4.63E-20 | -1.6023466 | 0.291 | 0.479 | 7.61E-16 | 8 |
| Cd79a.8    | 6.92E-20 | -1.7457674 | 0.055 | 0.261 | 1.14E-15 | 8 |
| Tgfb1.5    | 1.59E-19 | 0.3927243  | 0.445 | 0.226 | 2.61E-15 | 8 |

|              |          |            |       |       |          |   |
|--------------|----------|------------|-------|-------|----------|---|
| Nme2.3       | 1.77E-19 | 0.43989493 | 0.736 | 0.542 | 2.92E-15 | 8 |
| Eps8.3       | 1.87E-19 | 0.49341298 | 0.313 | 0.141 | 3.07E-15 | 8 |
| Arf5.4       | 2.04E-19 | 0.49755576 | 0.615 | 0.402 | 3.36E-15 | 8 |
| Laptm5.2     | 2.24E-19 | 0.4209658  | 0.827 | 0.646 | 3.68E-15 | 8 |
| Itm2b.7      | 2.89E-19 | -0.7073861 | 0.709 | 0.791 | 4.76E-15 | 8 |
| Sec61b.4     | 3.14E-19 | 0.4903994  | 0.679 | 0.473 | 5.17E-15 | 8 |
| Malt1        | 3.53E-19 | 0.55092296 | 0.288 | 0.124 | 5.81E-15 | 8 |
| Rpl41.1      | 4.78E-19 | 0.46598049 | 0.876 | 0.739 | 7.86E-15 | 8 |
| Rpl18a.5     | 8.23E-19 | -0.3595906 | 0.937 | 0.963 | 1.35E-14 | 8 |
| Plbd1.6      | 9.18E-19 | 0.40240086 | 0.448 | 0.231 | 1.51E-14 | 8 |
| Ptprcap.8    | 1.23E-18 | -1.0831772 | 0.074 | 0.274 | 2.03E-14 | 8 |
| mt-Cytb.3    | 1.52E-18 | -0.3474215 | 0.879 | 0.94  | 2.50E-14 | 8 |
| 2010107E04Ri | 2.66E-18 | 0.47026749 | 0.505 | 0.293 | 4.38E-14 | 8 |
| Uba52.4      | 3.27E-18 | -0.3299845 | 0.97  | 0.975 | 5.37E-14 | 8 |
| Arpc2.5      | 4.61E-18 | 0.37065144 | 0.816 | 0.659 | 7.58E-14 | 8 |
| Capza2.3     | 5.90E-18 | 0.48808568 | 0.445 | 0.249 | 9.70E-14 | 8 |
| Psma7.2      | 6.01E-18 | 0.46135292 | 0.527 | 0.322 | 9.88E-14 | 8 |
| Ccnl1.6      | 6.30E-18 | 0.47210133 | 0.505 | 0.296 | 1.04E-13 | 8 |
| Rpl35a.2     | 7.97E-18 | 0.36098355 | 0.843 | 0.705 | 1.31E-13 | 8 |
| Clec4a2.1    | 1.80E-17 | 0.41257544 | 0.275 | 0.119 | 2.96E-13 | 8 |
| Lamtor4.1    | 2.56E-17 | 0.45729477 | 0.387 | 0.202 | 4.22E-13 | 8 |
| Stk17b.5     | 4.85E-17 | -0.8050772 | 0.255 | 0.446 | 7.98E-13 | 8 |
| Cd37.6       | 6.79E-17 | -0.9763733 | 0.151 | 0.338 | 1.12E-12 | 8 |
| Uqcc2.1      | 6.88E-17 | 0.44749933 | 0.332 | 0.164 | 1.13E-12 | 8 |
| Limd2.4      | 9.97E-17 | -0.7875833 | 0.17  | 0.365 | 1.64E-12 | 8 |
| Ramp1.1      | 1.19E-16 | 0.3178747  | 0.277 | 0.123 | 1.96E-12 | 8 |
| Lrp1.1       | 3.43E-16 | 0.3976716  | 0.277 | 0.125 | 5.64E-12 | 8 |
| Ptpre.2      | 4.37E-16 | 0.46621627 | 0.291 | 0.138 | 7.19E-12 | 8 |
| AW112010.7   | 4.49E-16 | -1.2416097 | 0.082 | 0.27  | 7.38E-12 | 8 |
| Ighm.6       | 4.60E-16 | -1.3794496 | 0.239 | 0.423 | 7.57E-12 | 8 |
| Tkt.2        | 8.47E-16 | 0.53665159 | 0.379 | 0.208 | 1.39E-11 | 8 |
| Anxa1.1      | 2.16E-15 | 0.46980079 | 0.302 | 0.146 | 3.56E-11 | 8 |
| Rassf4.6     | 2.87E-15 | 0.4001557  | 0.426 | 0.237 | 4.72E-11 | 8 |
| Uqcrq.2      | 3.02E-15 | 0.43285605 | 0.519 | 0.327 | 4.97E-11 | 8 |
| Nfam1.2      | 3.22E-15 | 0.37621242 | 0.283 | 0.133 | 5.29E-11 | 8 |
| Gstm1.6      | 3.74E-15 | -0.5632799 | 0.475 | 0.654 | 6.15E-11 | 8 |
| Prdx5.5      | 8.70E-15 | 0.41565137 | 0.522 | 0.326 | 1.43E-10 | 8 |
| Ptp4a2.3     | 1.87E-14 | 0.40373027 | 0.473 | 0.289 | 3.08E-10 | 8 |
| Ptafr.2      | 1.95E-14 | 0.3772811  | 0.294 | 0.141 | 3.22E-10 | 8 |
| Sirpa.2      | 2.53E-14 | 0.38038752 | 0.343 | 0.179 | 4.16E-10 | 8 |
| mt-Nd5.4     | 2.67E-14 | -0.4523561 | 0.53  | 0.666 | 4.40E-10 | 8 |
| Ly6d.7       | 3.38E-14 | -1.1682893 | 0.148 | 0.315 | 5.56E-10 | 8 |
| Vps37b.6     | 3.61E-14 | -0.9926563 | 0.085 | 0.251 | 5.93E-10 | 8 |

|           |            |            |       |       |          |    |
|-----------|------------|------------|-------|-------|----------|----|
| Mrpl33.2  | 3.67E-14   | 0.42404887 | 0.379 | 0.212 | 6.04E-10 | 8  |
| Etv3.1    | 4.61E-14   | 0.46314845 | 0.327 | 0.172 | 7.58E-10 | 8  |
| Kctd12.7  | 4.90E-14   | 0.29783132 | 0.571 | 0.361 | 8.05E-10 | 8  |
| Mgl2.8    | 5.43E-14   | 0.32278884 | 0.429 | 0.237 | 8.93E-10 | 8  |
| Rpl3.5    | 5.50E-14   | -0.3751898 | 0.764 | 0.841 | 9.05E-10 | 8  |
| Glud1.2   | 7.92E-14   | 0.45341036 | 0.437 | 0.26  | 1.30E-09 | 8  |
| Ndufa6.1  | 8.57E-14   | 0.40383444 | 0.577 | 0.401 | 1.41E-09 | 8  |
| Csrnp1.2  | 1.39E-13   | 0.3895255  | 0.382 | 0.216 | 2.28E-09 | 8  |
| Ybx1.1    | 1.58E-13   | 0.3674105  | 0.706 | 0.547 | 2.60E-09 | 8  |
| Tmem160   | 1.60E-13   | 0.455182   | 0.349 | 0.189 | 2.62E-09 | 8  |
| Pim1.5    | 1.85E-13   | 0.30020786 | 0.67  | 0.439 | 3.04E-09 | 8  |
| Kdm6b.7   | 2.13E-13   | 0.40528313 | 0.492 | 0.303 | 3.50E-09 | 8  |
| Atpif1.7  | 2.78E-13   | 0.41264624 | 0.486 | 0.307 | 4.57E-09 | 8  |
| Emp3.4    | 2.82E-13   | 0.40180618 | 0.593 | 0.426 | 4.64E-09 | 8  |
| Malat1.4  | 3.12E-13   | -0.4100759 | 0.929 | 0.937 | 5.13E-09 | 8  |
| Plek.4    | 3.41E-13   | 0.32665712 | 0.533 | 0.338 | 5.60E-09 | 8  |
| H2-T22.3  | 0.00173765 | 0.36243236 | 0.417 | 0.158 | 1        | 20 |
| Pycard.2  | 4.37E-13   | 0.39135554 | 0.354 | 0.198 | 7.19E-09 | 8  |
| Rac1.3    | 4.56E-13   | 0.35471474 | 0.613 | 0.425 | 7.51E-09 | 8  |
| Iqgap1.2  | 5.10E-13   | 0.39942433 | 0.607 | 0.433 | 8.39E-09 | 8  |
| Gnai2.6   | 5.28E-13   | 0.30988977 | 0.679 | 0.521 | 8.69E-09 | 8  |
| Ctsz.5    | 5.55E-13   | 0.36395521 | 0.53  | 0.344 | 9.12E-09 | 8  |
| Gadd45b.7 | 9.85E-13   | 0.27496555 | 0.426 | 0.242 | 1.62E-08 | 8  |
| Ucp2.3    | 1.16E-12   | 0.28694051 | 0.772 | 0.589 | 1.91E-08 | 8  |
| Capzb.4   | 1.20E-12   | 0.35783772 | 0.643 | 0.465 | 1.97E-08 | 8  |
| Erp29.5   | 1.72E-12   | 0.36666131 | 0.538 | 0.358 | 2.83E-08 | 8  |
| Selenop.8 | 1.78E-12   | -1.3915425 | 0.299 | 0.422 | 2.93E-08 | 8  |
| H2afz.7   | 1.82E-12   | 0.25678194 | 0.775 | 0.579 | 2.99E-08 | 8  |
| Irf5.2    | 2.51E-12   | 0.38407156 | 0.302 | 0.161 | 4.14E-08 | 8  |
| Reep3     | 3.75E-12   | 0.34036159 | 0.258 | 0.127 | 6.17E-08 | 8  |
| Diaph1.2  | 4.45E-12   | 0.30253095 | 0.324 | 0.174 | 7.31E-08 | 8  |
| Rps3.5    | 4.50E-12   | -0.2955071 | 0.907 | 0.913 | 7.39E-08 | 8  |
| H2afj.2   | 4.63E-12   | 0.37064706 | 0.547 | 0.368 | 7.62E-08 | 8  |
| Il2rg.6   | 6.01E-12   | -0.716204  | 0.135 | 0.291 | 9.89E-08 | 8  |
| Egr2.1    | 6.02E-12   | 0.28211206 | 0.272 | 0.135 | 9.90E-08 | 8  |
| Cox4i1    | 6.85E-12   | 0.2735396  | 0.83  | 0.693 | 1.13E-07 | 8  |
| Rrbp1.6   | 7.11E-12   | 0.38668721 | 0.514 | 0.34  | 1.17E-07 | 8  |
| Rpl13a.7  | 8.29E-12   | -0.3807958 | 0.794 | 0.814 | 1.36E-07 | 8  |
| Marcks.7  | 8.38E-12   | 0.32441255 | 0.5   | 0.324 | 1.38E-07 | 8  |
| Preli1.2  | 9.22E-12   | 0.34189751 | 0.475 | 0.305 | 1.52E-07 | 8  |
| Rpl8.5    | 9.55E-12   | -0.3225353 | 0.929 | 0.916 | 1.57E-07 | 8  |
| Gltf.4    | 1.08E-11   | 0.30965481 | 0.42  | 0.25  | 1.77E-07 | 8  |
| Rpl19.5   | 1.93E-11   | -0.2676517 | 0.959 | 0.954 | 3.18E-07 | 8  |



|             |          |            |       |       |            |   |
|-------------|----------|------------|-------|-------|------------|---|
| Nrros.8     | 1.94E-11 | 0.33357741 | 0.448 | 0.276 | 3.18E-07   | 8 |
| Shisa5.6    | 2.96E-11 | -0.6806602 | 0.332 | 0.457 | 4.88E-07   | 8 |
| Klf2.6      | 3.41E-11 | -0.6319259 | 0.492 | 0.6   | 5.61E-07   | 8 |
| Ctss.6      | 6.26E-11 | 0.25122166 | 0.69  | 0.492 | 1.03E-06   | 8 |
| Sdf2l1.1    | 1.14E-10 | 0.39514734 | 0.286 | 0.158 | 1.88E-06   | 8 |
| Ncf2.1      | 1.19E-10 | 0.35789994 | 0.299 | 0.169 | 1.96E-06   | 8 |
| Tubb6.1     | 1.71E-10 | 0.29780982 | 0.277 | 0.148 | 2.81E-06   | 8 |
| Bhlhe40.2   | 1.85E-10 | 0.25029729 | 0.319 | 0.177 | 3.04E-06   | 8 |
| Ndufc1      | 1.96E-10 | 0.40499725 | 0.297 | 0.168 | 3.22E-06   | 8 |
| Abracl.5    | 1.97E-10 | 0.36525204 | 0.407 | 0.254 | 3.24E-06   | 8 |
| Chmp4b      | 2.66E-10 | 0.3106695  | 0.365 | 0.217 | 4.38E-06   | 8 |
| Usmg5       | 2.70E-10 | 0.38108397 | 0.412 | 0.268 | 4.45E-06   | 8 |
| Adgre5.5    | 2.78E-10 | 0.30631721 | 0.387 | 0.234 | 4.57E-06   | 8 |
| Rpl10-ps3.1 | 3.51E-10 | -0.2504256 | 0.863 | 0.895 | 5.77E-06   | 8 |
| Bola2       | 4.42E-10 | 0.441461   | 0.266 | 0.15  | 7.27E-06   | 8 |
| mt-Nd2.3    | 5.10E-10 | -0.3040899 | 0.731 | 0.801 | 8.40E-06   | 8 |
| H2-T22.1    | 5.80E-08 | 0.35866933 | 0.253 | 0.154 | 0.00095406 | 7 |
| Atp5l.1     | 5.42E-10 | 0.35858711 | 0.651 | 0.509 | 8.91E-06   | 8 |
| Sfr1        | 5.59E-10 | 0.362342   | 0.319 | 0.189 | 9.19E-06   | 8 |
| Cox7c.1     | 5.98E-10 | 0.36065948 | 0.582 | 0.437 | 9.83E-06   | 8 |
| Ptpn18.3    | 6.08E-10 | -0.4135473 | 0.516 | 0.618 | 1.00E-05   | 8 |
| Plekho1     | 6.32E-10 | 0.38046428 | 0.253 | 0.137 | 1.04E-05   | 8 |
| Pf4.8       | 7.34E-10 | -1.2283897 | 0.192 | 0.312 | 1.21E-05   | 8 |
| Myo1g.2     | 8.25E-10 | 0.31155945 | 0.272 | 0.151 | 1.36E-05   | 8 |
| Sfn2.2      | 8.68E-10 | 0.31948094 | 0.352 | 0.212 | 1.43E-05   | 8 |
| Rps15a.6    | 1.03E-09 | -0.2857774 | 0.94  | 0.951 | 1.70E-05   | 8 |
| Mrps24.1    | 1.23E-09 | 0.27076108 | 0.357 | 0.213 | 2.02E-05   | 8 |
| Rpl12.6     | 1.32E-09 | -0.3971411 | 0.725 | 0.763 | 2.17E-05   | 8 |
| Serinc3.8   | 1.40E-09 | -0.5900622 | 0.225 | 0.363 | 2.30E-05   | 8 |
| Mrps21      | 1.45E-09 | 0.30736936 | 0.371 | 0.231 | 2.38E-05   | 8 |
| Hexa.6      | 2.02E-09 | 0.28908829 | 0.445 | 0.284 | 3.32E-05   | 8 |
| Cdk2ap2.5   | 2.15E-09 | 0.33564907 | 0.407 | 0.259 | 3.54E-05   | 8 |
| Timm13      | 3.66E-09 | 0.34274782 | 0.343 | 0.211 | 6.03E-05   | 8 |
| Arpc5.1     | 3.74E-09 | 0.35401073 | 0.525 | 0.372 | 6.15E-05   | 8 |
| Cox6b1      | 4.15E-09 | 0.32716428 | 0.56  | 0.42  | 6.82E-05   | 8 |
| Cops9       | 4.87E-09 | 0.39504398 | 0.332 | 0.207 | 8.02E-05   | 8 |
| Mpeg1.2     | 5.43E-09 | 0.27255349 | 0.33  | 0.197 | 8.92E-05   | 8 |
| Txn2        | 6.09E-09 | 0.28940897 | 0.341 | 0.205 | 0.0001001  | 8 |
| Rex1bd      | 6.90E-09 | 0.28747959 | 0.264 | 0.148 | 0.00011342 | 8 |
| Gsn.1       | 7.54E-09 | 0.35269099 | 0.253 | 0.143 | 0.00012406 | 8 |
| S100a13.2   | 8.65E-09 | 0.29472082 | 0.363 | 0.225 | 0.00014231 | 8 |
| Cdc42.1     | 8.91E-09 | 0.2759966  | 0.67  | 0.532 | 0.00014654 | 8 |
| BC005537.2  | 9.22E-09 | 0.27066182 | 0.31  | 0.186 | 0.00015164 | 8 |

|           |          |            |       |       |            |   |
|-----------|----------|------------|-------|-------|------------|---|
| Tspo.4    | 9.64E-09 | 0.27622339 | 0.569 | 0.416 | 0.00015853 | 8 |
| Ypel3.4   | 1.45E-08 | -0.5474524 | 0.187 | 0.311 | 0.00023779 | 8 |
| H13.2     | 1.51E-08 | 0.28173052 | 0.299 | 0.177 | 0.00024911 | 8 |
| Hsp90b1.2 | 2.57E-08 | 0.26730121 | 0.629 | 0.468 | 0.0004224  | 8 |
| Eif3f.5   | 2.65E-08 | -0.3854771 | 0.555 | 0.621 | 0.00043529 | 8 |
| Uqcr10    | 3.32E-08 | 0.34201082 | 0.401 | 0.266 | 0.00054602 | 8 |
| Arpc4.2   | 3.44E-08 | 0.33825967 | 0.481 | 0.336 | 0.00056633 | 8 |
| Ndufb8    | 4.03E-08 | 0.33753478 | 0.387 | 0.257 | 0.00066224 | 8 |
| Cox5b.2   | 5.16E-08 | 0.25402292 | 0.574 | 0.428 | 0.00084914 | 8 |
| Metap2    | 7.22E-08 | 0.28546704 | 0.277 | 0.166 | 0.00118815 | 8 |
| Cox6a1.1  | 8.32E-08 | 0.27666745 | 0.56  | 0.421 | 0.00136902 | 8 |
| Kmt2e.3   | 8.97E-08 | -0.5101423 | 0.157 | 0.276 | 0.00147596 | 8 |
| Taok3.1   | 1.04E-07 | 0.31804039 | 0.313 | 0.197 | 0.00170472 | 8 |
| Fosl2.3   | 1.21E-07 | 0.2713401  | 0.332 | 0.209 | 0.00198415 | 8 |
| Eno1.4    | 1.86E-07 | 0.25800349 | 0.547 | 0.406 | 0.00305227 | 8 |
| Rac2.7    | 1.86E-07 | -0.5090101 | 0.407 | 0.485 | 0.00306622 | 8 |
| Ddx5.3    | 1.87E-07 | -0.3187873 | 0.654 | 0.705 | 0.00307358 | 8 |
| Ndufa2    | 2.49E-07 | 0.298725   | 0.462 | 0.333 | 0.00408759 | 8 |
| Jun.8     | 2.63E-07 | -0.986613  | 0.396 | 0.466 | 0.00433109 | 8 |
| Rpl10.2   | 2.66E-07 | 0.25070033 | 0.799 | 0.671 | 0.00437684 | 8 |
| Grb2      | 2.99E-07 | 0.29139553 | 0.291 | 0.183 | 0.00491158 | 8 |
| Cox6c.1   | 3.81E-07 | 0.27480517 | 0.566 | 0.442 | 0.00627451 | 8 |
| Tma7.2    | 5.14E-07 | 0.28414641 | 0.467 | 0.33  | 0.00845825 | 8 |
| Ndufb4    | 7.16E-07 | 0.27783714 | 0.319 | 0.209 | 0.01178007 | 8 |
| Minos1    | 9.06E-07 | 0.28543011 | 0.299 | 0.194 | 0.01489843 | 8 |
| Ndufv3    | 9.86E-07 | 0.25316501 | 0.338 | 0.222 | 0.01621844 | 8 |
| Pkm.3     | 1.09E-06 | 0.26037552 | 0.423 | 0.303 | 0.01788375 | 8 |
| Atp5g3.1  | 1.17E-06 | 0.31571166 | 0.563 | 0.453 | 0.01919235 | 8 |
| Sec61g.1  | 1.33E-06 | 0.26050596 | 0.473 | 0.34  | 0.02184817 | 8 |
| Tacc1     | 1.38E-06 | 0.25834479 | 0.294 | 0.187 | 0.02269219 | 8 |
| Fkbp2.1   | 1.54E-06 | 0.26326296 | 0.275 | 0.175 | 0.02528416 | 8 |
| Tpm3.1    | 1.68E-06 | 0.25765115 | 0.602 | 0.489 | 0.02767633 | 8 |
| Ifrd1.2   | 1.93E-06 | 0.27690585 | 0.352 | 0.234 | 0.0316663  | 8 |
| Rbm39.4   | 2.49E-06 | -0.3463346 | 0.459 | 0.535 | 0.04099861 | 8 |
| Ndufa13.2 | 4.53E-06 | 0.27985385 | 0.505 | 0.396 | 0.07446283 | 8 |
| Cox5a.2   | 1.08E-05 | 0.28320102 | 0.481 | 0.375 | 0.17825715 | 8 |
| Atp5g1.1  | 1.98E-05 | 0.2720978  | 0.31  | 0.216 | 0.32526552 | 8 |
| Lcp1.2    | 2.31E-05 | -0.3162495 | 0.492 | 0.536 | 0.38036718 | 8 |
| Cnbp.6    | 2.66E-05 | -0.3500849 | 0.357 | 0.433 | 0.43718571 | 8 |
| Naca.4    | 3.80E-05 | -0.2651396 | 0.621 | 0.66  | 0.62486447 | 8 |
| Srrm2     | 7.61E-05 | -0.2787817 | 0.442 | 0.514 | 1          | 8 |
| Foxp1.4   | 7.77E-05 | -0.452331  | 0.192 | 0.27  | 1          | 8 |
| Laptm4a.5 | 7.78E-05 | -0.3792445 | 0.195 | 0.276 | 1          | 8 |

|            |            |            |       |       |           |   |
|------------|------------|------------|-------|-------|-----------|---|
| Psemb8.3   | 0.00019127 | -0.3421947 | 0.448 | 0.481 | 1         | 8 |
| Rnaset2a.4 | 0.00023036 | -0.3734543 | 0.212 | 0.282 | 1         | 8 |
| Fcgrt.7    | 0.00026618 | -0.5329736 | 0.19  | 0.26  | 1         | 8 |
| Pnrc1.3    | 0.00027394 | -0.3148621 | 0.456 | 0.519 | 1         | 8 |
| Ctsb.7     | 0.00032745 | -0.7248064 | 0.475 | 0.476 | 1         | 8 |
| Xist.2     | 0.00035131 | -0.3261575 | 0.418 | 0.477 | 1         | 8 |
| Ubc.6      | 0.00045331 | -0.3405767 | 0.503 | 0.543 | 1         | 8 |
| Park7.2    | 0.00047472 | -0.3445941 | 0.198 | 0.269 | 1         | 8 |
| Arl6ip1.2  | 0.00075934 | -0.2912732 | 0.272 | 0.343 | 1         | 8 |
| Arpc3.2    | 0.00094726 | -0.2574135 | 0.497 | 0.527 | 1         | 8 |
| Myl12b.5   | 0.00096534 | -0.2665659 | 0.462 | 0.51  | 1         | 8 |
| Ccl2.8     | 0.00105856 | -0.2587316 | 0.393 | 0.276 | 1         | 8 |
| Prrc2c.2   | 0.0014017  | -0.3435097 | 0.217 | 0.279 | 1         | 8 |
| Hmgb1.3    | 0.00278012 | -0.2684299 | 0.365 | 0.422 | 1         | 8 |
| Ifngr1.5   | 0.00300131 | -0.3670742 | 0.341 | 0.384 | 1         | 8 |
| Egr1.7     | 0.00311095 | -0.2742605 | 0.629 | 0.449 | 1         | 8 |
| Calm2.5    | 0.00386447 | -0.3002809 | 0.349 | 0.389 | 1         | 8 |
| Snrpb.1    | 0.00801102 | -0.2533859 | 0.228 | 0.28  | 1         | 8 |
| Sh3glb1.1  | 0.00854215 | -0.279065  | 0.313 | 0.353 | 1         | 8 |
| Lgmn.7     | 0.00965389 | -0.4759195 | 0.247 | 0.281 | 1         | 8 |
| Naaa.1     | 0          | 1.77032492 | 0.805 | 0.098 | 0         | 9 |
| Rtl8c      | 0          | 1.55194753 | 0.594 | 0.026 | 0         | 9 |
| Clec9a     | 0          | 1.52589831 | 0.584 | 0.008 | 0         | 9 |
| Ifi205     | 0          | 1.41431598 | 0.498 | 0.009 | 0         | 9 |
| Xcr1       | 0          | 1.30322908 | 0.481 | 0.002 | 0         | 9 |
| Itgae      | 0          | 1.0312617  | 0.348 | 0.008 | 0         | 9 |
| 3-Sep      | 0          | 1.02772774 | 0.365 | 0.006 | 0         | 9 |
| Ppt1       | 9.68E-277  | 1.58578481 | 0.737 | 0.086 | 1.59E-272 | 9 |
| Tlr3       | 2.72E-272  | 0.79022123 | 0.256 | 0.005 | 4.47E-268 | 9 |
| Wdfy4.2    | 2.61E-237  | 1.57556429 | 0.768 | 0.114 | 4.29E-233 | 9 |
| Qpct       | 7.97E-226  | 1.02228075 | 0.399 | 0.026 | 1.31E-221 | 9 |
| Irf8.2     | 1.89E-216  | 1.54129126 | 0.928 | 0.204 | 3.11E-212 | 9 |
| Naga       | 5.01E-208  | 1.26077489 | 0.594 | 0.071 | 8.24E-204 | 9 |
| Pianp      | 2.48E-200  | 0.74541874 | 0.266 | 0.011 | 4.08E-196 | 9 |
| Plbd1.7    | 2.02E-189  | 1.53080409 | 0.901 | 0.215 | 3.32E-185 | 9 |
| Cst3.7     | 1.79E-185  | 2.08888798 | 1     | 0.673 | 2.95E-181 | 9 |
| Anpep      | 3.24E-177  | 0.82058256 | 0.317 | 0.021 | 5.32E-173 | 9 |
| Slc25a20   | 1.18E-170  | 0.93257554 | 0.399 | 0.036 | 1.93E-166 | 9 |
| Rtl8b      | 4.81E-159  | 0.90309577 | 0.352 | 0.03  | 7.92E-155 | 9 |
| Ckb.3      | 5.98E-154  | 1.36324001 | 0.836 | 0.212 | 9.83E-150 | 9 |
| Mpeg1.3    | 2.27E-152  | 1.31611503 | 0.785 | 0.181 | 3.74E-148 | 9 |
| St3gal5    | 2.88E-151  | 0.91145985 | 0.461 | 0.056 | 4.74E-147 | 9 |
| Flt3       | 5.11E-151  | 0.7814388  | 0.341 | 0.03  | 8.41E-147 | 9 |

|           |           |            |       |       |           |   |
|-----------|-----------|------------|-------|-------|-----------|---|
| Tnni2     | 4.65E-146 | 0.70819174 | 0.276 | 0.019 | 7.64E-142 | 9 |
| Gm2a.9    | 4.72E-143 | 1.30317726 | 0.894 | 0.263 | 7.76E-139 | 9 |
| Pak1      | 2.31E-137 | 0.8253415  | 0.413 | 0.049 | 3.80E-133 | 9 |
| Trim35    | 4.75E-137 | 1.11990234 | 0.512 | 0.077 | 7.81E-133 | 9 |
| Rab7b     | 1.64E-135 | 1.03854887 | 0.505 | 0.075 | 2.70E-131 | 9 |
| Pkib      | 4.93E-133 | 0.88248037 | 0.437 | 0.056 | 8.12E-129 | 9 |
| Jaml      | 3.74E-127 | 0.85041298 | 0.416 | 0.054 | 6.16E-123 | 9 |
| Rab32     | 3.41E-125 | 0.79947089 | 0.358 | 0.04  | 5.61E-121 | 9 |
| Cd24a.1   | 3.62E-125 | 0.93461031 | 0.621 | 0.117 | 5.95E-121 | 9 |
| Ahr       | 2.26E-120 | 0.92357916 | 0.478 | 0.074 | 3.71E-116 | 9 |
| Psap.7    | 5.55E-116 | 1.06441505 | 0.997 | 0.664 | 9.13E-112 | 9 |
| Ece1      | 8.40E-114 | 0.79160144 | 0.328 | 0.037 | 1.38E-109 | 9 |
| Ncoa7     | 3.38E-112 | 0.86028516 | 0.478 | 0.079 | 5.56E-108 | 9 |
| Grasp     | 9.18E-110 | 0.88221114 | 0.365 | 0.048 | 1.51E-105 | 9 |
| Ptms.5    | 7.31E-108 | 1.12985288 | 0.819 | 0.267 | 1.20E-103 | 9 |
| H2-Aa     | 1.65E-51  | 0.35506248 | 0.895 | 0.705 | 2.72E-47  | 0 |
| Gng10.1   | 6.06E-106 | 1.02388217 | 0.72  | 0.194 | 9.96E-102 | 9 |
| BC028528  | 4.88E-105 | 0.96656227 | 0.42  | 0.067 | 8.02E-101 | 9 |
| Hepacam2  | 2.22E-102 | 0.69971997 | 0.307 | 0.036 | 3.66E-98  | 9 |
| Ppm1m     | 1.98E-100 | 0.8294528  | 0.427 | 0.071 | 3.26E-96  | 9 |
| Pfkip     | 3.21E-96  | 0.7765324  | 0.457 | 0.082 | 5.29E-92  | 9 |
| Nr4a2.3   | 5.37E-95  | 1.0919849  | 0.672 | 0.183 | 8.83E-91  | 9 |
| Anxa1.2   | 7.70E-95  | 0.91235262 | 0.59  | 0.136 | 1.27E-90  | 9 |
| Rab11fip1 | 1.20E-94  | 0.91910192 | 0.362 | 0.055 | 1.97E-90  | 9 |
| Tmsb10.7  | 1.23E-93  | 0.91776471 | 1     | 0.777 | 2.03E-89  | 9 |
| Atox1.8   | 9.98E-91  | 1.00136442 | 0.918 | 0.438 | 1.64E-86  | 9 |
| Fgl2.1    | 2.26E-89  | 0.8573919  | 0.522 | 0.112 | 3.72E-85  | 9 |
| Arsb.1    | 8.50E-87  | 0.70830062 | 0.369 | 0.059 | 1.40E-82  | 9 |
| Rnase6    | 1.08E-86  | 0.77370178 | 0.451 | 0.088 | 1.78E-82  | 9 |
| Txndc15   | 7.83E-85  | 0.6756507  | 0.375 | 0.063 | 1.29E-80  | 9 |
| Tmsb4x.6  | 9.26E-84  | 0.60070314 | 1     | 0.993 | 1.52E-79  | 9 |
| Cbfa2t3.1 | 9.78E-84  | 0.85526217 | 0.563 | 0.136 | 1.61E-79  | 9 |
| Bcl2a1a   | 1.42E-83  | 0.73812217 | 0.365 | 0.061 | 2.34E-79  | 9 |
| Lsp1.8    | 1.11E-81  | 0.90181398 | 0.915 | 0.376 | 1.83E-77  | 9 |
| Psemb9.3  | 3.28E-81  | 0.89575494 | 0.713 | 0.224 | 5.39E-77  | 9 |
| Pmaip1.1  | 3.60E-81  | 0.84587865 | 0.433 | 0.087 | 5.92E-77  | 9 |
| H2-Oa.1   | 4.73E-36  | 0.34228296 | 0.305 | 0.127 | 7.78E-32  | 2 |
| Olfm1.2   | 4.54E-75  | 0.76429455 | 0.44  | 0.094 | 7.47E-71  | 9 |
| Atpif1.8  | 2.51E-72  | 0.85978051 | 0.795 | 0.296 | 4.13E-68  | 9 |
| Lrrk2     | 1.37E-71  | 0.55776983 | 0.266 | 0.038 | 2.25E-67  | 9 |
| Gm6377    | 2.42E-70  | 0.63596991 | 0.324 | 0.056 | 3.97E-66  | 9 |
| Camk1d    | 5.29E-70  | 0.66896556 | 0.41  | 0.086 | 8.70E-66  | 9 |
| Tbc1d8    | 1.48E-69  | 0.5794365  | 0.266 | 0.039 | 2.44E-65  | 9 |

|           |          |            |       |       |            |    |
|-----------|----------|------------|-------|-------|------------|----|
| Tbc1d9    | 6.59E-67 | 0.67178232 | 0.317 | 0.057 | 1.08E-62   | 9  |
| Bcl2a1d.2 | 1.09E-66 | 0.76202387 | 0.536 | 0.145 | 1.79E-62   | 9  |
| Alox5ap.9 | 1.24E-65 | 0.77901697 | 0.884 | 0.379 | 2.03E-61   | 9  |
| Shtn1     | 7.48E-65 | 0.61825904 | 0.328 | 0.061 | 1.23E-60   | 9  |
| Ucp2.4    | 3.70E-64 | 0.79238194 | 0.935 | 0.585 | 6.08E-60   | 9  |
| H2afz.8   | 2.10E-63 | 0.83806782 | 0.945 | 0.574 | 3.46E-59   | 9  |
| Crip1.7   | 9.80E-62 | 0.67093068 | 0.993 | 0.71  | 1.61E-57   | 9  |
| Gpr171    | 1.56E-59 | 0.57546638 | 0.345 | 0.07  | 2.56E-55   | 9  |
| Plp2.2    | 2.86E-59 | 0.65471562 | 0.512 | 0.142 | 4.71E-55   | 9  |
| H2-K1.12  | 0.000461 | 0.33852785 | 0.971 | 0.842 | 1          | 18 |
| H2afy.5   | 1.77E-56 | 0.67670086 | 0.679 | 0.236 | 2.91E-52   | 9  |
| Gpr65     | 3.92E-56 | 0.57362635 | 0.311 | 0.062 | 6.44E-52   | 9  |
| H2-D1.1   | 4.48E-28 | 0.32546915 | 0.964 | 0.886 | 7.37E-24   | 5  |
| Eef1b2.3  | 4.85E-55 | 0.70168353 | 0.952 | 0.659 | 7.98E-51   | 9  |
| Fnbp1.1   | 5.04E-55 | 0.76082999 | 0.618 | 0.211 | 8.29E-51   | 9  |
| S100a11.6 | 5.25E-55 | 0.7632421  | 0.823 | 0.382 | 8.64E-51   | 9  |
| H2-Q4.4   | 3.91E-05 | 0.32034699 | 0.417 | 0.215 | 0.64342673 | 16 |
| Pomp.3    | 9.38E-55 | 0.73231205 | 0.741 | 0.306 | 1.54E-50   | 9  |
| Rab43     | 1.29E-54 | 0.51046561 | 0.314 | 0.064 | 2.13E-50   | 9  |
| Sh3bp1    | 2.48E-54 | 0.55662512 | 0.362 | 0.082 | 4.09E-50   | 9  |
| Bri3bp.1  | 2.87E-53 | 0.62929001 | 0.43  | 0.114 | 4.72E-49   | 9  |
| Actg1.5   | 6.68E-53 | 0.51684197 | 0.993 | 0.898 | 1.10E-48   | 9  |
| Cd180     | 1.30E-51 | 0.62761162 | 0.389 | 0.098 | 2.14E-47   | 9  |
| Commd8    | 2.52E-51 | 0.62125162 | 0.345 | 0.08  | 4.14E-47   | 9  |
| Cd74.7    | 3.25E-51 | 0.54492347 | 1     | 0.82  | 5.34E-47   | 9  |
| Rps11.4   | 8.68E-51 | 0.42521071 | 0.99  | 0.966 | 1.43E-46   | 9  |
| Egr3      | 1.60E-49 | 0.55917991 | 0.358 | 0.086 | 2.63E-45   | 9  |
| Slamf7.1  | 2.35E-49 | 0.69994835 | 0.416 | 0.116 | 3.87E-45   | 9  |
| Itgb7.2   | 3.46E-49 | 0.53009104 | 0.553 | 0.173 | 5.69E-45   | 9  |
| Taldo1.3  | 4.58E-49 | 0.64241677 | 0.679 | 0.263 | 7.54E-45   | 9  |
| Batf3.1   | 4.87E-49 | 0.58480684 | 0.375 | 0.095 | 8.01E-45   | 9  |
| Man2b1.6  | 8.89E-49 | 0.69270751 | 0.7   | 0.284 | 1.46E-44   | 9  |
| Prkar2a   | 1.46E-48 | 0.55130944 | 0.297 | 0.064 | 2.40E-44   | 9  |
| Cd9.1     | 2.07E-48 | 0.55199708 | 0.427 | 0.117 | 3.41E-44   | 9  |
| Sub1.5    | 4.91E-48 | 0.66306996 | 0.853 | 0.448 | 8.08E-44   | 9  |
| 6-Sep     | 1.84E-47 | 0.54001787 | 0.403 | 0.108 | 3.03E-43   | 9  |
| Unc119.1  | 3.15E-47 | 0.62751463 | 0.369 | 0.096 | 5.18E-43   | 9  |
| Phf11b    | 3.97E-47 | 0.56063642 | 0.304 | 0.068 | 6.53E-43   | 9  |
| Cyca.4    | 3.95E-45 | 0.62291054 | 0.621 | 0.232 | 6.50E-41   | 9  |
| Irf5.3    | 7.10E-45 | 0.58838229 | 0.488 | 0.155 | 1.17E-40   | 9  |
| Fgd2      | 4.63E-44 | 0.55349891 | 0.334 | 0.084 | 7.62E-40   | 9  |
| Psme1.5   | 5.76E-44 | 0.64833903 | 0.785 | 0.39  | 9.48E-40   | 9  |
| Rala.1    | 1.34E-43 | 0.584614   | 0.505 | 0.17  | 2.20E-39   | 9  |

|            |          |            |       |       |            |   |
|------------|----------|------------|-------|-------|------------|---|
| Actb.4     | 1.72E-43 | 0.41972045 | 1     | 0.993 | 2.83E-39   | 9 |
| Psmb8.4    | 4.87E-43 | 0.58271726 | 0.86  | 0.465 | 8.02E-39   | 9 |
| Dynlt1b    | 8.76E-43 | 0.55400077 | 0.304 | 0.073 | 1.44E-38   | 9 |
| Basp1      | 1.16E-42 | 0.54887285 | 0.304 | 0.073 | 1.92E-38   | 9 |
| Clic4.7    | 6.14E-40 | 0.53434744 | 0.614 | 0.238 | 1.01E-35   | 9 |
| Cd52.6     | 1.50E-39 | 0.49007515 | 0.973 | 0.725 | 2.47E-35   | 9 |
| Anxa2.9    | 1.74E-39 | 0.5605352  | 0.638 | 0.261 | 2.87E-35   | 9 |
| Cytip.6    | 3.49E-38 | 0.48764634 | 0.727 | 0.312 | 5.74E-34   | 9 |
| Rplp0.5    | 9.94E-38 | 0.40099019 | 0.993 | 0.9   | 1.63E-33   | 9 |
| Apoe.8     | 1.49E-37 | -2.7486214 | 0.119 | 0.484 | 2.45E-33   | 9 |
| Ccnd1.1    | 3.08E-37 | 0.55512409 | 0.396 | 0.122 | 5.07E-33   | 9 |
| Cass4      | 1.32E-36 | 0.45279455 | 0.263 | 0.064 | 2.17E-32   | 9 |
| Lgals3.8   | 7.52E-36 | 0.47751607 | 0.747 | 0.334 | 1.24E-31   | 9 |
| Itpr1      | 5.96E-35 | 0.34574232 | 0.294 | 0.077 | 9.80E-31   | 9 |
| Alcam.1    | 9.68E-35 | 0.48137946 | 0.256 | 0.064 | 1.59E-30   | 9 |
| Dctpp1     | 1.32E-34 | 0.48247607 | 0.266 | 0.068 | 2.18E-30   | 9 |
| Vim.8      | 1.42E-34 | 0.5688801  | 0.928 | 0.61  | 2.34E-30   | 9 |
| Chd7       | 4.02E-34 | 0.47139941 | 0.355 | 0.107 | 6.62E-30   | 9 |
| Tmem176b.6 | 5.78E-34 | -1.5057273 | 0.092 | 0.452 | 9.51E-30   | 9 |
| Ppp1r11    | 8.40E-34 | 0.45856145 | 0.468 | 0.167 | 1.38E-29   | 9 |
| Agpat4.1   | 1.37E-33 | 0.53539624 | 0.283 | 0.078 | 2.25E-29   | 9 |
| Zyx.8      | 1.44E-33 | 0.55911985 | 0.587 | 0.25  | 2.37E-29   | 9 |
| Pafah1b3   | 2.18E-33 | 0.42935124 | 0.27  | 0.07  | 3.59E-29   | 9 |
| Id2.2      | 2.37E-33 | 0.5481813  | 0.515 | 0.203 | 3.90E-29   | 9 |
| Clec12a.1  | 3.27E-33 | 0.42978127 | 0.341 | 0.102 | 5.39E-29   | 9 |
| H2-Q4.1    | 1.61E-06 | 0.31632959 | 0.309 | 0.213 | 0.02643882 | 7 |
| Arpc2.6    | 7.47E-33 | 0.49256241 | 0.932 | 0.656 | 1.23E-28   | 9 |
| Gsn.2      | 7.48E-33 | 0.40110895 | 0.413 | 0.138 | 1.23E-28   | 9 |
| Efhd2.7    | 2.66E-32 | 0.48611505 | 0.642 | 0.283 | 4.38E-28   | 9 |
| Calm1.2    | 3.27E-32 | 0.43531342 | 0.959 | 0.708 | 5.39E-28   | 9 |
| Got2       | 1.69E-31 | 0.38575508 | 0.273 | 0.074 | 2.78E-27   | 9 |
| Lmnb1      | 1.85E-31 | 0.47573588 | 0.311 | 0.093 | 3.04E-27   | 9 |
| Plekho2.2  | 3.39E-31 | 0.45053419 | 0.471 | 0.174 | 5.57E-27   | 9 |
| Hfe.1      | 5.80E-31 | 0.5268036  | 0.321 | 0.099 | 9.55E-27   | 9 |
| Gusb       | 1.85E-30 | 0.43922912 | 0.345 | 0.11  | 3.05E-26   | 9 |
| Actr3.3    | 2.26E-30 | 0.51791592 | 0.857 | 0.512 | 3.72E-26   | 9 |
| Aif1.2     | 6.32E-30 | 0.41690691 | 0.498 | 0.189 | 1.04E-25   | 9 |
| Fuca1      | 8.46E-30 | 0.46255762 | 0.406 | 0.143 | 1.39E-25   | 9 |
| Selenop.9  | 1.42E-29 | -2.2445488 | 0.116 | 0.428 | 2.34E-25   | 9 |
| Tbca.1     | 2.82E-29 | 0.51065815 | 0.608 | 0.267 | 4.64E-25   | 9 |
| Ifi35      | 1.17E-28 | 0.46923312 | 0.266 | 0.077 | 1.93E-24   | 9 |
| Cxcl16     | 1.27E-28 | 0.35197943 | 0.328 | 0.103 | 2.08E-24   | 9 |
| Skap2      | 1.83E-28 | 0.41446177 | 0.338 | 0.111 | 3.01E-24   | 9 |

|             |          |            |       |       |          |   |
|-------------|----------|------------|-------|-------|----------|---|
| Sh3bgrl3.4  | 2.40E-28 | 0.41233299 | 0.969 | 0.739 | 3.95E-24 | 9 |
| S100a6.8    | 2.43E-28 | -0.8463568 | 0.631 | 0.757 | 4.00E-24 | 9 |
| Rpl18.4     | 4.18E-28 | 0.30994841 | 0.99  | 0.921 | 6.88E-24 | 9 |
| Myadm.1     | 4.20E-28 | 0.39560576 | 0.328 | 0.106 | 6.91E-24 | 9 |
| Cyb5a       | 6.06E-28 | 0.4453115  | 0.522 | 0.214 | 9.97E-24 | 9 |
| Rps5.5      | 1.03E-26 | 0.28511698 | 0.983 | 0.961 | 1.69E-22 | 9 |
| Napsa.8     | 1.25E-26 | 0.29630806 | 0.597 | 0.251 | 2.06E-22 | 9 |
| Cpne3       | 3.69E-26 | 0.36320018 | 0.3   | 0.096 | 6.08E-22 | 9 |
| Gdi2.3      | 4.87E-26 | 0.45508085 | 0.717 | 0.362 | 8.00E-22 | 9 |
| Skil        | 1.05E-25 | 0.50024338 | 0.341 | 0.12  | 1.73E-21 | 9 |
| Dock10.1    | 5.37E-25 | 0.45304488 | 0.464 | 0.193 | 8.83E-21 | 9 |
| Syng2.6     | 5.41E-25 | 0.38735177 | 0.539 | 0.237 | 8.90E-21 | 9 |
| Rpl28.3     | 5.86E-25 | 0.30987925 | 0.983 | 0.911 | 9.64E-21 | 9 |
| Sec61g.2    | 5.97E-25 | 0.41723678 | 0.686 | 0.333 | 9.82E-21 | 9 |
| C1qb.8      | 6.90E-25 | -2.1135993 | 0.082 | 0.363 | 1.13E-20 | 9 |
| Csf1r.8     | 7.00E-25 | -1.6058449 | 0.061 | 0.343 | 1.15E-20 | 9 |
| H3f3b.3     | 1.44E-24 | -0.5810399 | 0.915 | 0.901 | 2.37E-20 | 9 |
| Tbrg1       | 1.93E-24 | 0.40636821 | 0.283 | 0.093 | 3.17E-20 | 9 |
| C1qc.8      | 2.80E-24 | -2.1450618 | 0.068 | 0.344 | 4.61E-20 | 9 |
| Trib1.4     | 4.51E-24 | 0.40406481 | 0.495 | 0.217 | 7.41E-20 | 9 |
| Anxa6.2     | 5.00E-24 | 0.36966736 | 0.444 | 0.179 | 8.22E-20 | 9 |
| Cybb.6      | 5.81E-24 | -1.2649381 | 0.065 | 0.339 | 9.56E-20 | 9 |
| Csf2ra.3    | 6.68E-24 | 0.38351648 | 0.365 | 0.137 | 1.10E-19 | 9 |
| Hcls1.1     | 9.28E-24 | 0.37434008 | 0.522 | 0.227 | 1.53E-19 | 9 |
| Cnih4       | 1.24E-23 | 0.39987655 | 0.311 | 0.107 | 2.04E-19 | 9 |
| Rgs10.7     | 1.38E-23 | 0.35143045 | 0.584 | 0.264 | 2.27E-19 | 9 |
| Rps26.5     | 2.79E-23 | 0.28127386 | 0.99  | 0.932 | 4.59E-19 | 9 |
| Ccdc12.1    | 4.79E-23 | 0.41916784 | 0.491 | 0.217 | 7.88E-19 | 9 |
| Rps27a.3    | 4.99E-23 | 0.27603976 | 0.993 | 0.934 | 8.22E-19 | 9 |
| Cd86        | 6.54E-23 | 0.35477208 | 0.273 | 0.09  | 1.08E-18 | 9 |
| Tmem176a.6  | 1.04E-22 | -1.3069648 | 0.082 | 0.343 | 1.71E-18 | 9 |
| Fbl.1       | 1.24E-22 | 0.33547165 | 0.42  | 0.169 | 2.04E-18 | 9 |
| C1qa.8      | 1.40E-22 | -2.0386847 | 0.078 | 0.34  | 2.30E-18 | 9 |
| Rgs2        | 1.86E-22 | 0.28313146 | 0.474 | 0.2   | 3.06E-18 | 9 |
| B2m.5       | 1.86E-22 | -0.5508753 | 0.799 | 0.808 | 3.07E-18 | 9 |
| Mrc1.8      | 5.17E-22 | -1.4858095 | 0.055 | 0.315 | 8.50E-18 | 9 |
| Fam129a     | 1.07E-21 | 0.29955208 | 0.273 | 0.092 | 1.76E-17 | 9 |
| Tap1        | 1.67E-21 | 0.34872943 | 0.348 | 0.134 | 2.74E-17 | 9 |
| Ier5.6      | 1.98E-21 | 0.35008585 | 0.703 | 0.358 | 3.25E-17 | 9 |
| H13.3       | 2.64E-21 | 0.30443048 | 0.42  | 0.173 | 4.35E-17 | 9 |
| Rpl10-ps3.2 | 2.85E-21 | 0.30552185 | 0.983 | 0.89  | 4.68E-17 | 9 |
| H2-Q6.1     | 3.20E-12 | 0.29820543 | 0.288 | 0.151 | 5.26E-08 | 6 |
| Cebpb.9     | 4.49E-21 | -1.2954896 | 0.085 | 0.339 | 7.38E-17 | 9 |

|           |          |            |       |       |          |   |
|-----------|----------|------------|-------|-------|----------|---|
| Arhgap18  | 4.95E-21 | 0.30923731 | 0.283 | 0.098 | 8.15E-17 | 9 |
| Itm2c.1   | 5.24E-21 | 0.33245089 | 0.464 | 0.2   | 8.61E-17 | 9 |
| Pltp.9    | 7.37E-21 | -1.331307  | 0.089 | 0.346 | 1.21E-16 | 9 |
| Rpl37.2   | 1.13E-20 | 0.29802879 | 0.98  | 0.927 | 1.85E-16 | 9 |
| H2-Oa.3   | 2.96E-21 | 0.29739866 | 0.352 | 0.136 | 4.87E-17 | 9 |
| Rpl17.4   | 1.51E-20 | 0.37072198 | 0.863 | 0.56  | 2.48E-16 | 9 |
| Phlda1.1  | 1.92E-20 | 0.43821528 | 0.365 | 0.15  | 3.15E-16 | 9 |
| Pf4.9     | 1.92E-20 | -1.8965806 | 0.068 | 0.315 | 3.15E-16 | 9 |
| Mrpl52.2  | 2.32E-20 | 0.33205697 | 0.614 | 0.307 | 3.82E-16 | 9 |
| Wfdc17.7  | 3.24E-20 | -1.398398  | 0.092 | 0.339 | 5.32E-16 | 9 |
| Sec61b.5  | 3.67E-20 | 0.39273349 | 0.788 | 0.471 | 6.04E-16 | 9 |
| Zeb2.8    | 4.08E-20 | -1.1113282 | 0.061 | 0.305 | 6.71E-16 | 9 |
| Spi1.7    | 4.22E-20 | 0.34753794 | 0.601 | 0.294 | 6.95E-16 | 9 |
| F13a1.7   | 4.68E-20 | -1.5378866 | 0.048 | 0.288 | 7.70E-16 | 9 |
| Tes       | 4.97E-20 | 0.25158812 | 0.28  | 0.099 | 8.18E-16 | 9 |
| Lamp1.8   | 5.34E-20 | -1.125344  | 0.205 | 0.422 | 8.78E-16 | 9 |
| Rpl22.3   | 9.67E-20 | 0.29891927 | 0.973 | 0.822 | 1.59E-15 | 9 |
| Rpl36al.2 | 1.07E-19 | 0.35365014 | 0.87  | 0.601 | 1.76E-15 | 9 |
| Mlec      | 1.44E-19 | 0.32434321 | 0.273 | 0.098 | 2.36E-15 | 9 |
| Nfkbiz.7  | 1.67E-19 | -1.2550071 | 0.232 | 0.449 | 2.75E-15 | 9 |
| Fgfr1.3   | 1.87E-19 | 0.26501315 | 0.283 | 0.102 | 3.07E-15 | 9 |
| Txn1.3    | 1.89E-19 | 0.37754836 | 0.505 | 0.241 | 3.10E-15 | 9 |
| Mvb12a    | 1.90E-19 | 0.25898876 | 0.276 | 0.099 | 3.13E-15 | 9 |
| Myo1f.1   | 2.26E-19 | 0.29289015 | 0.314 | 0.12  | 3.72E-15 | 9 |
| Plekho1.1 | 2.97E-19 | 0.25239286 | 0.345 | 0.134 | 4.89E-15 | 9 |
| Rtraf.1   | 2.98E-19 | 0.36702659 | 0.529 | 0.257 | 4.90E-15 | 9 |
| Gstm1.7   | 3.18E-19 | -0.7404955 | 0.529 | 0.65  | 5.23E-15 | 9 |
| Evi2a     | 3.31E-19 | 0.29592206 | 0.294 | 0.109 | 5.44E-15 | 9 |
| Nr4a1.4   | 3.58E-19 | 0.30461054 | 0.823 | 0.493 | 5.89E-15 | 9 |
| Ctsd.9    | 4.10E-19 | -1.1902208 | 0.065 | 0.299 | 6.74E-15 | 9 |
| Atg3      | 4.53E-19 | 0.3275318  | 0.314 | 0.121 | 7.45E-15 | 9 |
| Pdia3.1   | 7.65E-19 | 0.36591046 | 0.662 | 0.358 | 1.26E-14 | 9 |
| Rpl14.6   | 1.07E-18 | 0.28986971 | 0.962 | 0.78  | 1.76E-14 | 9 |
| Spag9     | 1.46E-18 | 0.27329417 | 0.314 | 0.122 | 2.40E-14 | 9 |
| Nr4a3.1   | 1.87E-18 | 0.38301666 | 0.266 | 0.099 | 3.07E-14 | 9 |
| Cyth4.2   | 2.14E-18 | 0.31196589 | 0.478 | 0.223 | 3.52E-14 | 9 |
| Il2rg.7   | 3.64E-18 | -1.1085938 | 0.068 | 0.292 | 5.99E-14 | 9 |
| Cd83.6    | 4.35E-18 | 0.27698302 | 0.799 | 0.458 | 7.15E-14 | 9 |
| Cd79a.9   | 4.37E-18 | -1.9504424 | 0.041 | 0.259 | 7.19E-14 | 9 |
| Rps28.2   | 5.09E-18 | 0.32300446 | 0.956 | 0.792 | 8.37E-14 | 9 |
| Notch2    | 6.78E-18 | 0.32247827 | 0.29  | 0.113 | 1.12E-13 | 9 |
| Itm2b.8   | 7.77E-18 | -0.809607  | 0.826 | 0.786 | 1.28E-13 | 9 |
| P2ry10    | 1.77E-17 | 0.25311628 | 0.273 | 0.102 | 2.91E-13 | 9 |



|            |          |            |       |       |          |   |
|------------|----------|------------|-------|-------|----------|---|
| Avpi1.1    | 1.83E-17 | 0.25351954 | 0.253 | 0.091 | 3.00E-13 | 9 |
| Cbr2.8     | 2.03E-17 | -1.3325765 | 0.034 | 0.251 | 3.33E-13 | 9 |
| Tnfaip8.1  | 2.10E-17 | 0.36888279 | 0.389 | 0.177 | 3.45E-13 | 9 |
| Serf2.7    | 2.36E-17 | 0.32449054 | 0.935 | 0.755 | 3.88E-13 | 9 |
| Ifngr1.6   | 3.32E-17 | 0.25845192 | 0.683 | 0.371 | 5.45E-13 | 9 |
| Fxyd5.9    | 3.33E-17 | 0.2654277  | 0.778 | 0.453 | 5.47E-13 | 9 |
| Nap11.4    | 3.70E-17 | 0.32581638 | 0.509 | 0.251 | 6.08E-13 | 9 |
| Ptprcap.9  | 3.87E-17 | -1.2114738 | 0.061 | 0.273 | 6.37E-13 | 9 |
| Rpl27.4    | 5.04E-17 | 0.2567866  | 0.959 | 0.824 | 8.29E-13 | 9 |
| Ldha.4     | 5.09E-17 | 0.2652396  | 0.625 | 0.328 | 8.37E-13 | 9 |
| Fth1.6     | 1.16E-16 | -0.5598905 | 0.962 | 0.958 | 1.90E-12 | 9 |
| Mafb.7     | 1.17E-16 | -1.4708481 | 0.061 | 0.272 | 1.92E-12 | 9 |
| Rpl39.6    | 1.20E-16 | 0.25460136 | 0.973 | 0.886 | 1.97E-12 | 9 |
| Clec10a.8  | 1.35E-16 | -1.2993873 | 0.048 | 0.253 | 2.23E-12 | 9 |
| Jun.9      | 1.75E-16 | -1.5500976 | 0.3   | 0.469 | 2.88E-12 | 9 |
| Psme2.4    | 1.99E-16 | 0.31713968 | 0.597 | 0.324 | 3.27E-12 | 9 |
| Sept9.2    | 2.33E-16 | 0.26046303 | 0.352 | 0.151 | 3.83E-12 | 9 |
| Pgam1.1    | 2.38E-16 | 0.26754714 | 0.352 | 0.151 | 3.92E-12 | 9 |
| Plin2.1    | 2.68E-16 | 0.26019744 | 0.29  | 0.115 | 4.40E-12 | 9 |
| Rps27l.4   | 3.21E-16 | 0.25194025 | 0.577 | 0.297 | 5.28E-12 | 9 |
| Ctsb.8     | 3.33E-16 | -1.4094107 | 0.345 | 0.481 | 5.48E-12 | 9 |
| Lgmn.8     | 5.76E-16 | -1.153845  | 0.082 | 0.287 | 9.48E-12 | 9 |
| Usmg5.1    | 7.43E-16 | 0.2819512  | 0.526 | 0.265 | 1.22E-11 | 9 |
| Atp6v1g1.1 | 1.04E-15 | 0.26037724 | 0.553 | 0.282 | 1.71E-11 | 9 |
| Serinc3.9  | 1.38E-15 | -1.0548417 | 0.174 | 0.364 | 2.27E-11 | 9 |
| Twf2.1     | 1.44E-15 | 0.2817792  | 0.297 | 0.123 | 2.36E-11 | 9 |
| C1qbp      | 1.74E-15 | 0.26972088 | 0.311 | 0.131 | 2.87E-11 | 9 |
| Ctnna1     | 2.19E-15 | 0.26962787 | 0.263 | 0.105 | 3.61E-11 | 9 |
| Mgl2.9     | 3.90E-15 | -1.1587148 | 0.058 | 0.253 | 6.41E-11 | 9 |
| Atp1a1.2   | 3.91E-15 | 0.26297636 | 0.451 | 0.219 | 6.42E-11 | 9 |
| Sdf2l1.2   | 3.94E-15 | 0.2769651  | 0.348 | 0.157 | 6.48E-11 | 9 |
| Tspan13.1  | 5.25E-15 | 0.25998383 | 0.352 | 0.158 | 8.63E-11 | 9 |
| Gpcpd1.2   | 6.10E-15 | 0.25482419 | 0.338 | 0.15  | 1.00E-10 | 9 |
| Ssr4.3     | 6.17E-15 | 0.29572711 | 0.648 | 0.359 | 1.02E-10 | 9 |
| Capg.6     | 9.09E-15 | -0.9575146 | 0.072 | 0.265 | 1.50E-10 | 9 |
| Ctsa.7     | 1.48E-14 | -0.9383056 | 0.102 | 0.291 | 2.44E-10 | 9 |
| Mpc2.1     | 1.75E-14 | 0.26360187 | 0.406 | 0.196 | 2.88E-10 | 9 |
| Mdh1.1     | 3.49E-14 | 0.26596464 | 0.42  | 0.205 | 5.73E-10 | 9 |
| Rbm17      | 4.43E-14 | 0.25555002 | 0.259 | 0.107 | 7.29E-10 | 9 |
| M6pr       | 5.75E-14 | 0.25766763 | 0.365 | 0.171 | 9.46E-10 | 9 |
| Stard3nl   | 7.87E-14 | 0.28819986 | 0.321 | 0.144 | 1.29E-09 | 9 |
| Ppib       | 9.61E-14 | 0.2841755  | 0.676 | 0.401 | 1.58E-09 | 9 |
| Sh3bgrl.1  | 1.03E-13 | 0.26856762 | 0.379 | 0.178 | 1.69E-09 | 9 |

|            |          |            |       |       |            |    |
|------------|----------|------------|-------|-------|------------|----|
| Ighm.7     | 1.19E-13 | -1.5647993 | 0.263 | 0.42  | 1.96E-09   | 9  |
| Ndufa6.2   | 1.26E-13 | 0.29609327 | 0.672 | 0.399 | 2.07E-09   | 9  |
| Eif1       | 1.31E-13 | -0.342008  | 0.894 | 0.872 | 2.15E-09   | 9  |
| Sdc3.2     | 1.41E-13 | 0.26840425 | 0.348 | 0.164 | 2.32E-09   | 9  |
| Fcer1g.7   | 1.93E-13 | -0.9808924 | 0.587 | 0.576 | 3.18E-09   | 9  |
| Eif3k.4    | 3.52E-13 | 0.27060449 | 0.724 | 0.432 | 5.79E-09   | 9  |
| Atp5e.4    | 3.66E-13 | 0.26256254 | 0.874 | 0.613 | 6.03E-09   | 9  |
| mt-Atp8.6  | 3.73E-13 | -0.3153294 | 0.976 | 0.927 | 6.14E-09   | 9  |
| Tagln2.5   | 3.77E-13 | 0.25568564 | 0.771 | 0.479 | 6.21E-09   | 9  |
| Marcksl1.7 | 4.15E-13 | -1.1857453 | 0.304 | 0.44  | 6.83E-09   | 9  |
| Polr1d     | 4.89E-13 | 0.26361216 | 0.532 | 0.289 | 8.04E-09   | 9  |
| Cxcl2.9    | 7.29E-13 | -1.6716604 | 0.078 | 0.257 | 1.20E-08   | 9  |
| Klf2.7     | 8.38E-13 | -0.820054  | 0.519 | 0.598 | 1.38E-08   | 9  |
| Smdt1.5    | 1.01E-12 | 0.29123138 | 0.587 | 0.344 | 1.67E-08   | 9  |
| Csf2rb.1   | 1.14E-12 | 0.25156937 | 0.27  | 0.119 | 1.88E-08   | 9  |
| Fyb.6      | 1.22E-12 | -0.9056338 | 0.085 | 0.256 | 2.00E-08   | 9  |
| Ppp2ca     | 1.33E-12 | 0.25380242 | 0.283 | 0.127 | 2.18E-08   | 9  |
| mt-Nd2.4   | 2.20E-12 | -0.4323215 | 0.846 | 0.796 | 3.63E-08   | 9  |
| Socs3.8    | 3.26E-12 | -0.9611855 | 0.119 | 0.285 | 5.37E-08   | 9  |
| Ly6d.8     | 3.78E-12 | -1.1946983 | 0.147 | 0.314 | 6.21E-08   | 9  |
| Junb.6     | 5.45E-12 | -0.5132011 | 0.87  | 0.842 | 8.97E-08   | 9  |
| Gltf.5     | 1.00E-11 | 0.28369619 | 0.461 | 0.25  | 1.65E-07   | 9  |
| Rac2.8     | 3.72E-11 | -0.7436007 | 0.392 | 0.485 | 6.12E-07   | 9  |
| Cd14.8     | 4.77E-11 | -1.1685536 | 0.116 | 0.266 | 7.85E-07   | 9  |
| Mt1.9      | 5.92E-11 | -1.3158983 | 0.304 | 0.42  | 9.74E-07   | 9  |
| Arhgdib.6  | 7.61E-11 | -0.6020546 | 0.58  | 0.596 | 1.25E-06   | 9  |
| Ifi2712a.8 | 1.00E-10 | -1.0257939 | 0.27  | 0.408 | 1.65E-06   | 9  |
| Herpud1.1  | 5.19E-10 | 0.29103679 | 0.338 | 0.18  | 8.54E-06   | 9  |
| Ier3.6     | 9.12E-10 | -1.057396  | 0.195 | 0.331 | 1.50E-05   | 9  |
| Hspa8.2    | 1.60E-09 | 0.2632696  | 0.894 | 0.719 | 2.62E-05   | 9  |
| Nfkbia.7   | 2.24E-09 | -0.6059192 | 0.413 | 0.524 | 3.68E-05   | 9  |
| Calm2.6    | 2.44E-09 | -0.7354967 | 0.283 | 0.391 | 4.02E-05   | 9  |
| Ly6e.7     | 2.60E-09 | -0.5099412 | 0.846 | 0.747 | 4.27E-05   | 9  |
| Limd2.5    | 3.93E-09 | -0.7574254 | 0.242 | 0.36  | 6.46E-05   | 9  |
| Cfp.8      | 4.85E-08 | -0.7654064 | 0.198 | 0.316 | 0.00079697 | 9  |
| Ctsc.7     | 5.66E-08 | -0.8760705 | 0.341 | 0.418 | 0.00093033 | 9  |
| Tnfaip3.6  | 5.83E-08 | -0.7078068 | 0.215 | 0.333 | 0.00095977 | 9  |
| Atp6v0c.7  | 8.45E-08 | -0.7119222 | 0.358 | 0.426 | 0.00138981 | 9  |
| Ccl2.9     | 1.29E-07 | -1.231429  | 0.167 | 0.285 | 0.00211724 | 9  |
| Lgals1.6   | 1.75E-07 | -0.829202  | 0.331 | 0.406 | 0.00288326 | 9  |
| Cd37.7     | 2.08E-07 | -0.8356384 | 0.239 | 0.333 | 0.0034218  | 9  |
| Ypel3.5    | 2.09E-07 | -0.688975  | 0.205 | 0.309 | 0.00343266 | 9  |
| H2-T23     | 4.59E-05 | 0.2855631  | 0.571 | 0.22  | 0.75497138 | 18 |

|            |            |            |       |       |            |    |
|------------|------------|------------|-------|-------|------------|----|
| Pnrc1.4    | 7.31E-07   | -0.5874141 | 0.519 | 0.516 | 0.0120265  | 9  |
| Gm42418    | 1.11E-06   | -0.2660992 | 1     | 1     | 0.01823208 | 9  |
| mt-Nd4.4   | 1.40E-06   | -0.3379562 | 0.747 | 0.701 | 0.02310969 | 9  |
| mt-Nd5.5   | 2.61E-06   | -0.3786376 | 0.703 | 0.658 | 0.04289859 | 9  |
| Cltc.7     | 2.78E-06   | -0.6459507 | 0.249 | 0.335 | 0.04573852 | 9  |
| Gadd45b.8  | 3.25E-06   | -0.6359331 | 0.15  | 0.255 | 0.05340212 | 9  |
| Jund.7     | 4.41E-06   | -0.5532367 | 0.751 | 0.68  | 0.07259562 | 9  |
| Shisa5.7   | 8.39E-06   | -0.6675147 | 0.437 | 0.452 | 0.13794015 | 9  |
| Neat1.7    | 1.47E-05   | -0.7753996 | 0.259 | 0.329 | 0.24122073 | 9  |
| Ftl1.7     | 3.53E-05   | -0.6417042 | 0.962 | 0.888 | 0.58089104 | 9  |
| Gpx4       | 5.36E-05   | -0.4567143 | 0.41  | 0.444 | 0.88170624 | 9  |
| Jak1.4     | 5.95E-05   | -0.5796452 | 0.256 | 0.322 | 0.97939458 | 9  |
| Rap1b.5    | 6.89E-05   | -0.5252545 | 0.382 | 0.416 | 1          | 9  |
| Emp3.5     | 0.00010252 | -0.5075647 | 0.406 | 0.435 | 1          | 9  |
| Snx5.8     | 0.00011798 | -0.6046499 | 0.266 | 0.319 | 1          | 9  |
| Ehd4.7     | 0.00013132 | -0.6194654 | 0.201 | 0.269 | 1          | 9  |
| Ubc.7      | 0.00014387 | -0.4743682 | 0.556 | 0.54  | 1          | 9  |
| Ifitm2.8   | 0.00014855 | -0.698654  | 0.365 | 0.392 | 1          | 9  |
| Ccl6.9     | 0.00014906 | -0.9377623 | 0.403 | 0.413 | 1          | 9  |
| Foxp1.5    | 0.00019252 | -0.5721986 | 0.201 | 0.268 | 1          | 9  |
| Ddx5.4     | 0.00020481 | -0.3049959 | 0.765 | 0.7   | 1          | 9  |
| Klf6.8     | 0.00022054 | -0.5851143 | 0.529 | 0.53  | 1          | 9  |
| Tmem50a.2  | 0.00031675 | -0.5244806 | 0.307 | 0.347 | 1          | 9  |
| AW112010.8 | 0.00062841 | -0.9548156 | 0.205 | 0.263 | 1          | 9  |
| Ctss.7     | 0.00068486 | -0.5192359 | 0.56  | 0.499 | 1          | 9  |
| Cstb.6     | 0.00159273 | -0.5278027 | 0.208 | 0.259 | 1          | 9  |
| Ier2.7     | 0.00235952 | -0.4949139 | 0.608 | 0.554 | 1          | 9  |
| Ctsh.6     | 0.00335761 | -0.4671415 | 0.382 | 0.386 | 1          | 9  |
| Bri3.7     | 0.00382176 | -0.5216519 | 0.369 | 0.372 | 1          | 9  |
| Zfp36l1.7  | 0.0046332  | -0.4349633 | 0.573 | 0.526 | 1          | 9  |
| Laptm4a.6  | 0.00614407 | -0.4516782 | 0.239 | 0.273 | 1          | 9  |
| Cxcr6      | 0          | 2.1937639  | 0.655 | 0.026 | 0          | 10 |
| Actn2      | 0          | 1.52292754 | 0.345 | 0.004 | 0          | 10 |
| Thy1.2     | 3.71E-291  | 2.17630575 | 0.775 | 0.1   | 6.10E-287  | 10 |
| Il7r.1     | 4.67E-253  | 1.86792881 | 0.587 | 0.059 | 7.68E-249  | 10 |
| Cd3e.1     | 5.87E-231  | 1.75960323 | 0.689 | 0.094 | 9.66E-227  | 10 |
| Cd3g.1     | 2.37E-218  | 1.74826244 | 0.686 | 0.1   | 3.90E-214  | 10 |
| Il18r1     | 1.69E-193  | 1.25777321 | 0.263 | 0.012 | 2.79E-189  | 10 |
| Ramp1.2    | 2.35E-193  | 1.88324257 | 0.655 | 0.11  | 3.87E-189  | 10 |
| Lat.1      | 6.76E-163  | 1.50062864 | 0.57  | 0.088 | 1.11E-158  | 10 |
| Cd3d.1     | 1.06E-134  | 1.44376823 | 0.539 | 0.094 | 1.75E-130  | 10 |
| Icos       | 4.13E-118  | 1.28649865 | 0.345 | 0.042 | 6.79E-114  | 10 |
| Cd74.8     | 4.70E-113  | -3.3082494 | 0.273 | 0.848 | 7.73E-109  | 10 |

|            |            |            |       |       |            |    |
|------------|------------|------------|-------|-------|------------|----|
| Rora       | 1.67E-101  | 1.16274924 | 0.304 | 0.037 | 2.75E-97   | 10 |
| Serpinb1a  | 6.12E-97   | 1.22284945 | 0.341 | 0.049 | 1.01E-92   | 10 |
| Tmem176a.7 | 6.75E-97   | 1.38843522 | 0.778 | 0.316 | 1.11E-92   | 10 |
| H2-DMa.12  | 0.00021896 | 0.28457354 | 0.857 | 0.424 | 1          | 18 |
| H2-DMa.11  | 2.60E-05   | 0.28043092 | 0.815 | 0.423 | 0.42791856 | 17 |
| S100a6.9   | 6.93E-93   | 1.05110346 | 0.966 | 0.744 | 1.14E-88   | 10 |
| H2-Aa.1    | 2.78E-57   | 0.27580154 | 0.991 | 0.705 | 4.58E-53   | 1  |
| Pxdc1      | 8.48E-83   | 1.12567388 | 0.283 | 0.04  | 1.39E-78   | 10 |
| Ifngr1.7   | 2.16E-80   | 1.27324873 | 0.775 | 0.367 | 3.55E-76   | 10 |
| Lmo4       | 3.78E-80   | 1.30252909 | 0.399 | 0.085 | 6.21E-76   | 10 |
| Rinl.1     | 5.77E-79   | 1.20723856 | 0.375 | 0.075 | 9.48E-75   | 10 |
| Rgcc       | 1.04E-78   | 1.32065311 | 0.352 | 0.065 | 1.71E-74   | 10 |
| Tyrobp.9   | 1.05E-74   | -2.6219905 | 0.034 | 0.63  | 1.73E-70   | 10 |
| Emb.2      | 2.10E-74   | 1.30687172 | 0.57  | 0.189 | 3.46E-70   | 10 |
| Bcl11b     | 2.04E-71   | 1.05530944 | 0.266 | 0.041 | 3.35E-67   | 10 |
| Skap1.2    | 3.84E-71   | 1.11735755 | 0.396 | 0.089 | 6.31E-67   | 10 |
| Sept1.3    | 7.24E-70   | 1.16701177 | 0.519 | 0.155 | 1.19E-65   | 10 |
| Tmem176b.7 | 2.55E-68   | 1.13310494 | 0.816 | 0.424 | 4.19E-64   | 10 |
| Itgb7.3    | 3.85E-64   | 1.19976398 | 0.519 | 0.174 | 6.34E-60   | 10 |
| Ckb.4      | 5.21E-64   | 1.18530693 | 0.584 | 0.222 | 8.57E-60   | 10 |
| Ltb.4      | 2.57E-63   | 1.1978995  | 0.567 | 0.193 | 4.23E-59   | 10 |
| Fcer1g.8   | 1.08E-61   | -2.0399481 | 0.055 | 0.597 | 1.78E-57   | 10 |
| S100a10.8  | 4.95E-60   | 0.94007971 | 0.795 | 0.447 | 8.14E-56   | 10 |
| Tmsb10.8   | 7.92E-60   | 0.68784694 | 0.986 | 0.778 | 1.30E-55   | 10 |
| Cst3.8     | 1.27E-59   | -2.3457128 | 0.304 | 0.7   | 2.09E-55   | 10 |
| Klf2.8     | 8.02E-59   | -1.9269844 | 0.099 | 0.614 | 1.32E-54   | 10 |
| Lyz2.9     | 3.97E-58   | -3.005481  | 0.072 | 0.573 | 6.52E-54   | 10 |
| S100a11.7  | 5.12E-58   | 0.978888   | 0.734 | 0.385 | 8.42E-54   | 10 |
| Ltb4r1.1   | 2.90E-57   | 1.12128481 | 0.317 | 0.071 | 4.77E-53   | 10 |
| Capg.7     | 2.52E-56   | 1.11370675 | 0.59  | 0.245 | 4.15E-52   | 10 |
| AW112010.9 | 3.74E-56   | 0.83131461 | 0.628 | 0.247 | 6.15E-52   | 10 |
| Itk.1      | 9.13E-56   | 0.99293628 | 0.273 | 0.053 | 1.50E-51   | 10 |
| Selplg.6   | 5.04E-55   | 1.02741858 | 0.638 | 0.293 | 8.30E-51   | 10 |
| Rasgrp1    | 9.48E-55   | 1.02625653 | 0.287 | 0.06  | 1.56E-50   | 10 |
| Zfp36.6    | 2.92E-54   | -1.8363364 | 0.167 | 0.629 | 4.81E-50   | 10 |
| S100a4.3   | 7.42E-54   | 1.20440446 | 0.481 | 0.17  | 1.22E-49   | 10 |
| Ifitm3.9   | 1.37E-53   | -2.451422  | 0.024 | 0.509 | 2.25E-49   | 10 |
| Tmem64     | 3.48E-52   | 1.10699263 | 0.3   | 0.068 | 5.73E-48   | 10 |
| Uba52.5    | 7.66E-51   | 0.45922452 | 0.997 | 0.974 | 1.26E-46   | 10 |
| Ikzf3.1    | 3.17E-50   | 1.063476   | 0.379 | 0.107 | 5.21E-46   | 10 |
| Hcst.2     | 7.08E-50   | 1.00206769 | 0.502 | 0.184 | 1.16E-45   | 10 |
| Gimap3.3   | 5.62E-49   | 0.9665749  | 0.457 | 0.152 | 9.25E-45   | 10 |
| Ptprcap.10 | 5.74E-49   | 0.9245947  | 0.604 | 0.252 | 9.44E-45   | 10 |

|            |            |            |       |       |            |    |
|------------|------------|------------|-------|-------|------------|----|
| Ftl1.8     | 1.50E-47   | -1.2828596 | 0.737 | 0.897 | 2.48E-43   | 10 |
| Unc93b1.4  | 8.23E-46   | -1.5566834 | 0.031 | 0.48  | 1.35E-41   | 10 |
| Trbc2.1    | 1.49E-45   | 0.98378776 | 0.283 | 0.067 | 2.44E-41   | 10 |
| Cd83.7     | 1.92E-45   | -1.6986482 | 0.044 | 0.487 | 3.16E-41   | 10 |
| Cd82.1     | 2.18E-45   | 1.07860853 | 0.399 | 0.13  | 3.59E-41   | 10 |
| Fgl2.2     | 9.57E-45   | 1.10580252 | 0.372 | 0.118 | 1.57E-40   | 10 |
| Marcksl1.8 | 7.21E-44   | -2.1597289 | 0.024 | 0.451 | 1.19E-39   | 10 |
| H2-D1.5    | 1.33E-08   | 0.27079763 | 0.935 | 0.889 | 0.00021895 | 12 |
| H2-DMb1.9  | 2.30E-09   | 0.26599441 | 0.541 | 0.322 | 3.78E-05   | 11 |
| Apoe.9     | 1.08E-41   | -3.1414335 | 0.085 | 0.486 | 1.78E-37   | 10 |
| Eef1a1.6   | 1.34E-41   | 0.38245866 | 1     | 0.979 | 2.20E-37   | 10 |
| Alox5ap.10 | 1.65E-41   | -1.8266866 | 0.003 | 0.413 | 2.71E-37   | 10 |
| Ctss.8     | 1.77E-41   | -1.3919759 | 0.092 | 0.517 | 2.92E-37   | 10 |
| Ccl6.10    | 3.01E-41   | -2.1252114 | 0.017 | 0.428 | 4.95E-37   | 10 |
| H3f3b.4    | 4.15E-40   | -0.7598906 | 0.686 | 0.91  | 6.82E-36   | 10 |
| Jund.8     | 1.76E-39   | -1.1404385 | 0.304 | 0.697 | 2.90E-35   | 10 |
| Mt1.10     | 1.11E-37   | -2.3274815 | 0.048 | 0.43  | 1.83E-33   | 10 |
| Ifi27l2a.9 | 1.12E-37   | -1.9266216 | 0.031 | 0.417 | 1.84E-33   | 10 |
| Nfkbiz.8   | 5.66E-37   | -1.7381609 | 0.075 | 0.455 | 9.32E-33   | 10 |
| Lgals1.7   | 1.33E-35   | 0.89166039 | 0.655 | 0.393 | 2.18E-31   | 10 |
| Itgal.2    | 1.84E-35   | 0.84082691 | 0.334 | 0.109 | 3.03E-31   | 10 |
| Egr1.8     | 2.79E-35   | -1.938054  | 0.106 | 0.471 | 4.59E-31   | 10 |
| Ifitm2.9   | 3.94E-35   | -1.5641569 | 0.031 | 0.404 | 6.48E-31   | 10 |
| Gpr183     | 1.34E-34   | 0.90876411 | 0.338 | 0.114 | 2.20E-30   | 10 |
| Plek.5     | 3.35E-34   | -1.4440818 | 0.003 | 0.36  | 5.52E-30   | 10 |
| Il2rg.8    | 8.03E-34   | 0.84982547 | 0.546 | 0.274 | 1.32E-29   | 10 |
| Ctsh.7     | 1.13E-33   | -1.2947494 | 0.034 | 0.399 | 1.85E-29   | 10 |
| Pltp.10    | 1.68E-32   | -1.8759205 | 0.007 | 0.35  | 2.76E-28   | 10 |
| H2-Q7.13   | 0.00248688 | 0.25539121 | 0.583 | 0.254 | 1          | 20 |
| H2-Aa.5    | 5.60E-14   | -0.2528905 | 0.546 | 0.755 | 9.20E-10   | 5  |
| Ccnd3.3    | 2.04E-31   | 1.0161005  | 0.375 | 0.153 | 3.36E-27   | 10 |
| Fos.6      | 4.17E-31   | -1.3748743 | 0.324 | 0.632 | 6.85E-27   | 10 |
| Tagln2.6   | 4.85E-31   | 0.74068543 | 0.71  | 0.481 | 7.98E-27   | 10 |
| Pld4.6     | 5.39E-31   | -1.3245817 | 0.007 | 0.338 | 8.87E-27   | 10 |
| Cfp.9      | 1.81E-30   | -1.5414717 | 0     | 0.324 | 2.98E-26   | 10 |
| Csf1r.9    | 2.36E-30   | -1.7534884 | 0.017 | 0.345 | 3.89E-26   | 10 |
| Ctsc.8     | 2.89E-30   | -1.4188599 | 0.089 | 0.427 | 4.76E-26   | 10 |
| Marcks.8   | 4.19E-30   | -1.4189085 | 0.017 | 0.344 | 6.89E-26   | 10 |
| Atf3.7     | 4.95E-30   | -1.4323608 | 0.184 | 0.519 | 8.14E-26   | 10 |
| Ly86.5     | 8.19E-30   | -1.3035159 | 0.01  | 0.33  | 1.35E-25   | 10 |
| Sptssa     | 8.25E-30   | 0.92236256 | 0.389 | 0.167 | 1.36E-25   | 10 |
| C1qb.9     | 9.04E-30   | -2.519345  | 0.044 | 0.364 | 1.49E-25   | 10 |
| Wfdc17.8   | 9.41E-30   | -1.6924664 | 0.017 | 0.342 | 1.55E-25   | 10 |

|          |          |            |       |       |          |    |
|----------|----------|------------|-------|-------|----------|----|
| Saraf.1  | 4.92E-29 | 0.85817509 | 0.389 | 0.166 | 8.09E-25 | 10 |
| Mcl1.8   | 1.10E-28 | -1.1732625 | 0.102 | 0.44  | 1.81E-24 | 10 |
| Spi1.8   | 2.10E-28 | -1.2668637 | 0.007 | 0.317 | 3.45E-24 | 10 |
| C1qc.9   | 2.23E-28 | -2.5220921 | 0.038 | 0.345 | 3.67E-24 | 10 |
| Nr4a1.5  | 3.73E-28 | -1.0953334 | 0.191 | 0.518 | 6.13E-24 | 10 |
| Jun.10   | 3.96E-28 | -1.7784791 | 0.16  | 0.474 | 6.51E-24 | 10 |
| H2-D1    | 8.84E-19 | -0.2680465 | 0.783 | 0.9   | 1.45E-14 | 3  |
| Mrc1.9   | 1.31E-27 | -1.7362194 | 0.014 | 0.317 | 2.15E-23 | 10 |
| Grn.7    | 1.37E-27 | -1.3441084 | 0.068 | 0.388 | 2.26E-23 | 10 |
| Cybb.7   | 1.66E-27 | -1.2484702 | 0.027 | 0.341 | 2.74E-23 | 10 |
| Ppia.3   | 3.05E-27 | 0.41338203 | 0.956 | 0.886 | 5.01E-23 | 10 |
| Zeb2.9   | 7.60E-27 | -1.3162998 | 0.01  | 0.307 | 1.25E-22 | 10 |
| C1qa.9   | 1.49E-26 | -2.1940504 | 0.044 | 0.341 | 2.45E-22 | 10 |
| Pf4.10   | 1.55E-26 | -2.4394424 | 0.024 | 0.317 | 2.56E-22 | 10 |
| Ier3.7   | 3.31E-26 | -1.6397397 | 0.038 | 0.337 | 5.45E-22 | 10 |
| F13a1.8  | 1.43E-25 | -1.7677554 | 0.007 | 0.29  | 2.36E-21 | 10 |
| Nfkbia.8 | 2.72E-25 | -0.9243603 | 0.212 | 0.532 | 4.48E-21 | 10 |
| Lgmn.9   | 3.98E-25 | -1.3938947 | 0.007 | 0.29  | 6.55E-21 | 10 |
| Ier5.7   | 6.31E-25 | -1.0431384 | 0.072 | 0.383 | 1.04E-20 | 10 |
| Fcgr2b.6 | 8.63E-25 | -1.2097375 | 0.01  | 0.289 | 1.42E-20 | 10 |
| Fth1.7   | 9.34E-25 | -0.6905627 | 0.942 | 0.958 | 1.54E-20 | 10 |
| Fxyd5.10 | 1.04E-24 | 0.6304859  | 0.683 | 0.457 | 1.72E-20 | 10 |
| Ctsb.9   | 2.51E-24 | -1.3921185 | 0.205 | 0.486 | 4.12E-20 | 10 |
| Ctsz.6   | 2.91E-24 | -1.0221099 | 0.065 | 0.364 | 4.78E-20 | 10 |
| Ly6e.8   | 2.93E-24 | 0.44983822 | 0.904 | 0.744 | 4.82E-20 | 10 |
| Cd68.7   | 3.31E-24 | -1.2567364 | 0.01  | 0.282 | 5.45E-20 | 10 |
| Nrros.9  | 4.79E-24 | -1.1060797 | 0.017 | 0.295 | 7.88E-20 | 10 |
| Oaz1.1   | 5.45E-24 | 0.46606948 | 0.863 | 0.772 | 8.97E-20 | 10 |
| Cd81.7   | 8.64E-24 | -1.1911089 | 0.02  | 0.296 | 1.42E-19 | 10 |
| Ccl2.10  | 1.08E-23 | -2.105583  | 0.02  | 0.291 | 1.77E-19 | 10 |
| Fcgrt.8  | 1.72E-23 | -1.4027825 | 0.003 | 0.267 | 2.83E-19 | 10 |
| App.6    | 7.27E-23 | -1.1430345 | 0.017 | 0.284 | 1.20E-18 | 10 |
| Ehd4.8   | 8.47E-23 | -1.162395  | 0.014 | 0.277 | 1.39E-18 | 10 |
| Fosb.7   | 1.11E-22 | -1.0082069 | 0.218 | 0.513 | 1.82E-18 | 10 |
| Dusp1.6  | 2.10E-22 | -1.0205925 | 0.369 | 0.615 | 3.45E-18 | 10 |
| Mgl2.10  | 3.12E-22 | -1.4167672 | 0.003 | 0.255 | 5.14E-18 | 10 |
| Rassf4.7 | 3.50E-22 | -1.0788321 | 0.003 | 0.255 | 5.75E-18 | 10 |
| Prdx6.1  | 3.59E-22 | 0.85374822 | 0.365 | 0.176 | 5.90E-18 | 10 |
| Mafb.8   | 4.14E-22 | -1.6731181 | 0.017 | 0.273 | 6.80E-18 | 10 |
| Psap.8   | 8.02E-22 | -0.922013  | 0.502 | 0.683 | 1.32E-17 | 10 |
| Ii1b.8   | 1.12E-21 | -2.0292755 | 0.007 | 0.254 | 1.84E-17 | 10 |
| Ier2.8   | 1.44E-21 | -0.8987975 | 0.28  | 0.566 | 2.36E-17 | 10 |
| Napsa.9  | 1.90E-21 | -1.1696006 | 0.02  | 0.274 | 3.12E-17 | 10 |

|           |          |            |       |       |          |    |
|-----------|----------|------------|-------|-------|----------|----|
| Clec10a.9 | 3.65E-21 | -1.4100861 | 0.01  | 0.255 | 6.01E-17 | 10 |
| Lyn.5     | 3.89E-21 | -1.0479973 | 0.007 | 0.251 | 6.39E-17 | 10 |
| Kdm6b.8   | 5.30E-21 | -1.0193063 | 0.058 | 0.322 | 8.71E-17 | 10 |
| Rpl13a.8  | 6.91E-21 | 0.39633507 | 0.904 | 0.81  | 1.14E-16 | 10 |
| Cd14.9    | 8.56E-21 | -1.4212803 | 0.024 | 0.27  | 1.41E-16 | 10 |
| Tspo.5    | 1.06E-20 | 0.63963736 | 0.597 | 0.416 | 1.75E-16 | 10 |
| Bri3.8    | 1.52E-20 | -0.8791063 | 0.102 | 0.382 | 2.50E-16 | 10 |
| Rps24.5   | 1.69E-20 | 0.25866382 | 0.993 | 0.987 | 2.78E-16 | 10 |
| Litaf.3   | 1.83E-20 | -0.9357559 | 0.024 | 0.273 | 3.00E-16 | 10 |
| Gstp1.4   | 3.90E-20 | 0.79951982 | 0.481 | 0.291 | 6.42E-16 | 10 |
| Hexa.7    | 8.96E-20 | -0.9807932 | 0.048 | 0.301 | 1.47E-15 | 10 |
| H2-Ab1.4  | 4.91E-13 | -0.2928835 | 0.521 | 0.72  | 8.08E-09 | 5  |
| Cd69      | 1.43E-19 | 0.83312005 | 0.256 | 0.099 | 2.35E-15 | 10 |
| Eno1.5    | 3.02E-19 | 0.63239681 | 0.58  | 0.406 | 4.97E-15 | 10 |
| Cxcl2.10  | 8.25E-19 | -2.0460712 | 0.031 | 0.259 | 1.36E-14 | 10 |
| Ncor1     | 8.29E-19 | 0.72933999 | 0.369 | 0.192 | 1.36E-14 | 10 |
| Rel.7     | 2.40E-18 | -0.8588266 | 0.048 | 0.289 | 3.95E-14 | 10 |
| Rpl12.7   | 3.37E-18 | 0.35568251 | 0.894 | 0.756 | 5.55E-14 | 10 |
| Klf4.7    | 4.28E-18 | -1.2116953 | 0.137 | 0.384 | 7.04E-14 | 10 |
| Ninj1.7   | 5.19E-18 | -1.1343708 | 0.027 | 0.251 | 8.54E-14 | 10 |
| Shisa5.8  | 8.77E-18 | 0.57390822 | 0.625 | 0.445 | 1.44E-13 | 10 |
| Prr13.4   | 1.11E-17 | 0.67452261 | 0.44  | 0.26  | 1.82E-13 | 10 |
| Atox1.9   | 1.17E-17 | -0.7364221 | 0.201 | 0.466 | 1.92E-13 | 10 |
| Gpx1.9    | 2.14E-17 | -0.7529025 | 0.58  | 0.717 | 3.52E-13 | 10 |
| Gimap4.3  | 4.24E-17 | 0.60035402 | 0.324 | 0.149 | 6.97E-13 | 10 |
| Aldoa.4   | 4.27E-17 | 0.64773829 | 0.529 | 0.36  | 7.02E-13 | 10 |
| B2m.6     | 5.29E-17 | 0.37247498 | 0.881 | 0.805 | 8.71E-13 | 10 |
| Stk24.1   | 5.65E-17 | 0.71498189 | 0.324 | 0.161 | 9.30E-13 | 10 |
| Socs3.9   | 6.73E-17 | -0.9528005 | 0.061 | 0.287 | 1.11E-12 | 10 |
| Anxa6.3   | 1.20E-16 | 0.68139531 | 0.348 | 0.183 | 1.97E-12 | 10 |
| Neat1.8   | 1.80E-16 | -0.9095928 | 0.099 | 0.335 | 2.95E-12 | 10 |
| Ly6a.2    | 2.17E-16 | 0.76639244 | 0.341 | 0.169 | 3.57E-12 | 10 |
| Rexo2     | 3.19E-16 | 0.72182834 | 0.321 | 0.166 | 5.25E-12 | 10 |
| H2afz.9   | 5.68E-16 | -0.7157996 | 0.362 | 0.597 | 9.34E-12 | 10 |
| mt-Atp8.7 | 5.82E-16 | 0.27214168 | 0.956 | 0.928 | 9.58E-12 | 10 |
| Rpl14.7   | 6.12E-16 | 0.35781399 | 0.877 | 0.783 | 1.01E-11 | 10 |
| Kctd12.8  | 6.20E-16 | -0.8490098 | 0.143 | 0.38  | 1.02E-11 | 10 |
| Atp6v0c.8 | 6.36E-16 | -0.7193939 | 0.188 | 0.433 | 1.05E-11 | 10 |
| Rplp2.3   | 6.79E-16 | 0.28083057 | 0.959 | 0.918 | 1.12E-11 | 10 |
| Klf6.9    | 7.89E-16 | -0.7558649 | 0.29  | 0.539 | 1.30E-11 | 10 |
| Rrbp1.7   | 5.15E-15 | -0.6353138 | 0.119 | 0.357 | 8.47E-11 | 10 |
| Snx5.9    | 5.50E-15 | -0.7195362 | 0.099 | 0.325 | 9.05E-11 | 10 |
| Ppp1r18.4 | 6.93E-15 | 0.63809835 | 0.413 | 0.253 | 1.14E-10 | 10 |

|               |          |            |       |       |          |    |
|---------------|----------|------------|-------|-------|----------|----|
| Cd79a.10      | 8.53E-15 | -1.5693024 | 0.065 | 0.258 | 1.40E-10 | 10 |
| Arf5.5        | 9.85E-15 | 0.65697044 | 0.532 | 0.407 | 1.62E-10 | 10 |
| Chd3.1        | 1.01E-14 | 0.68076727 | 0.259 | 0.12  | 1.67E-10 | 10 |
| Cd164         | 1.03E-14 | 0.68370684 | 0.256 | 0.117 | 1.70E-10 | 10 |
| Btg2.6        | 2.08E-14 | -0.527608  | 0.464 | 0.679 | 3.43E-10 | 10 |
| H2-D1.2       | 3.98E-13 | -0.3079294 | 0.827 | 0.893 | 6.55E-09 | 8  |
| Cebpb.10      | 3.64E-14 | -0.8724591 | 0.123 | 0.337 | 5.98E-10 | 10 |
| Smpdl3a.1     | 5.95E-14 | 0.64756782 | 0.3   | 0.155 | 9.79E-10 | 10 |
| Stat1.1       | 6.83E-14 | 0.82531    | 0.311 | 0.165 | 1.12E-09 | 10 |
| Rpl28.4       | 8.68E-14 | -0.3213325 | 0.843 | 0.916 | 1.43E-09 | 10 |
| Ccn1.7        | 9.35E-14 | -0.6642431 | 0.099 | 0.314 | 1.54E-09 | 10 |
| Pfn1.3        | 1.09E-13 | 0.2653176  | 0.918 | 0.857 | 1.80E-09 | 10 |
| Rac2.9        | 1.18E-13 | 0.43198883 | 0.621 | 0.476 | 1.94E-09 | 10 |
| Gdi2.4        | 1.69E-13 | -0.5725015 | 0.154 | 0.384 | 2.78E-09 | 10 |
| Erp29.6       | 2.05E-13 | -0.5817401 | 0.147 | 0.375 | 3.37E-09 | 10 |
| Atp6v0b.7     | 2.46E-13 | -0.6213948 | 0.143 | 0.368 | 4.04E-09 | 10 |
| Psmb8.5       | 2.76E-13 | 0.52076903 | 0.597 | 0.475 | 4.53E-09 | 10 |
| Sdcbp.5       | 3.60E-13 | -0.6660469 | 0.082 | 0.282 | 5.92E-09 | 10 |
| Man2b1.7      | 3.89E-13 | -0.6564156 | 0.099 | 0.307 | 6.40E-09 | 10 |
| Gstm1.8       | 4.78E-13 | 0.44132233 | 0.741 | 0.642 | 7.87E-09 | 10 |
| Serp1.5       | 5.94E-13 | -0.5569601 | 0.16  | 0.384 | 9.77E-09 | 10 |
| Pkm.4         | 6.90E-13 | 0.6219354  | 0.444 | 0.303 | 1.14E-08 | 10 |
| Rabac1        | 7.99E-13 | 0.62856613 | 0.437 | 0.3   | 1.31E-08 | 10 |
| H2-Eb1.4      | 6.46E-19 | -0.3513964 | 0.485 | 0.722 | 1.06E-14 | 5  |
| Rps29.2       | 1.38E-12 | -0.3305626 | 0.788 | 0.898 | 2.27E-08 | 10 |
| Ubc.8         | 1.63E-12 | -0.5157202 | 0.311 | 0.55  | 2.68E-08 | 10 |
| Gapdh.4       | 2.68E-12 | 0.37066205 | 0.788 | 0.711 | 4.41E-08 | 10 |
| Junb.7        | 3.54E-12 | -0.4067689 | 0.73  | 0.847 | 5.82E-08 | 10 |
| Laptm5.3      | 5.80E-12 | 0.33965844 | 0.754 | 0.651 | 9.54E-08 | 10 |
| Ets1.3        | 5.84E-12 | 0.44724688 | 0.334 | 0.179 | 9.61E-08 | 10 |
| Myh9.4        | 6.67E-12 | 0.48099118 | 0.604 | 0.498 | 1.10E-07 | 10 |
| Ptms.6        | 7.00E-12 | -0.5922601 | 0.102 | 0.295 | 1.15E-07 | 10 |
| Clta.7        | 9.74E-12 | -0.462795  | 0.321 | 0.557 | 1.60E-07 | 10 |
| Foxp1.6       | 1.10E-11 | -0.6407234 | 0.089 | 0.273 | 1.80E-07 | 10 |
| 1810058I24Ril | 1.22E-11 | 0.63515531 | 0.324 | 0.193 | 2.01E-07 | 10 |
| Zfand5.6      | 1.33E-11 | -0.6415411 | 0.085 | 0.269 | 2.19E-07 | 10 |
| Ucp2.5        | 1.68E-11 | 0.43079177 | 0.669 | 0.595 | 2.77E-07 | 10 |
| Leprot1.2     | 1.91E-11 | 0.59291395 | 0.263 | 0.138 | 3.13E-07 | 10 |
| Akr1a1.6      | 2.20E-11 | -0.4946578 | 0.15  | 0.36  | 3.61E-07 | 10 |
| Rps27l.5      | 2.78E-11 | -0.5016227 | 0.116 | 0.315 | 4.57E-07 | 10 |
| Cd52.7        | 3.93E-11 | 0.28024608 | 0.901 | 0.728 | 6.46E-07 | 10 |
| Ccnd2.3       | 9.87E-11 | 0.53473168 | 0.334 | 0.2   | 1.62E-06 | 10 |
| Fyb.7         | 1.69E-10 | -0.6225879 | 0.085 | 0.256 | 2.78E-06 | 10 |



|            |          |            |       |       |            |    |
|------------|----------|------------|-------|-------|------------|----|
| Ppp1r12a.2 | 2.13E-10 | 0.60590585 | 0.328 | 0.203 | 3.50E-06   | 10 |
| Clic4.8    | 3.06E-10 | -0.5951685 | 0.089 | 0.258 | 5.03E-06   | 10 |
| Atpif1.9   | 4.33E-10 | -0.4852372 | 0.133 | 0.322 | 7.12E-06   | 10 |
| Lgals3.9   | 4.60E-10 | -0.6784439 | 0.181 | 0.356 | 7.56E-06   | 10 |
| Ighm.8     | 6.43E-10 | -1.1839262 | 0.239 | 0.421 | 1.06E-05   | 10 |
| Eif4a1.1   | 6.89E-10 | -0.4671258 | 0.143 | 0.33  | 1.13E-05   | 10 |
| H3f3a.6    | 7.42E-10 | -0.4126272 | 0.587 | 0.744 | 1.22E-05   | 10 |
| Rps26.6    | 8.29E-10 | -0.2733874 | 0.887 | 0.936 | 1.36E-05   | 10 |
| Npc2.7     | 2.13E-09 | -0.4515912 | 0.331 | 0.519 | 3.51E-05   | 10 |
| Rpl35a.3   | 3.19E-09 | -0.3409146 | 0.543 | 0.718 | 5.25E-05   | 10 |
| Crip1.8    | 3.21E-09 | -0.6319326 | 0.652 | 0.723 | 5.27E-05   | 10 |
| Diaph1.3   | 6.86E-09 | 0.56267398 | 0.287 | 0.176 | 0.00011291 | 10 |
| Tax1bp1.3  | 7.10E-09 | 0.47445499 | 0.386 | 0.27  | 0.00011674 | 10 |
| Cltc.8     | 8.04E-09 | -0.5164507 | 0.171 | 0.338 | 0.00013224 | 10 |
| Id2.3      | 9.30E-09 | 0.39759038 | 0.338 | 0.21  | 0.00015293 | 10 |
| Myl12b.6   | 1.21E-08 | 0.36884488 | 0.601 | 0.504 | 0.00019868 | 10 |
| Tgfb1.2    | 1.25E-08 | -0.4064724 | 0.16  | 0.335 | 0.0002057  | 10 |
| Arpc1b.7   | 1.50E-08 | -0.3438067 | 0.457 | 0.629 | 0.0002474  | 10 |
| Tuba1b.3   | 1.63E-08 | -0.4855459 | 0.157 | 0.327 | 0.00026881 | 10 |
| Ppp1r15a.7 | 1.82E-08 | -0.4666249 | 0.191 | 0.363 | 0.00029879 | 10 |
| Dbi.5      | 1.85E-08 | -0.4082183 | 0.13  | 0.298 | 0.0003039  | 10 |
| Efhd2.8    | 1.88E-08 | -0.441787  | 0.133 | 0.302 | 0.00030902 | 10 |
| Plp2.3     | 2.68E-08 | 0.50397964 | 0.256 | 0.152 | 0.00044154 | 10 |
| Ctsa.8     | 2.87E-08 | -0.479094  | 0.133 | 0.29  | 0.00047185 | 10 |
| Atp5h.3    | 3.35E-08 | 0.41291163 | 0.567 | 0.495 | 0.00055038 | 10 |
| Lamp1.9    | 4.35E-08 | -0.4927605 | 0.253 | 0.42  | 0.0007149  | 10 |
| Ddx3x.5    | 5.94E-08 | -0.4227284 | 0.119 | 0.274 | 0.00097727 | 10 |
| Rbm39.5    | 6.92E-08 | 0.36596449 | 0.611 | 0.528 | 0.00113782 | 10 |
| Ndfip1.3   | 1.21E-07 | 0.52288882 | 0.389 | 0.294 | 0.00199734 | 10 |
| Gm42418.1  | 1.39E-07 | 0.35740421 | 1     | 1     | 0.00228397 | 10 |
| Sat1.8     | 1.90E-07 | -0.4474773 | 0.184 | 0.345 | 0.00311848 | 10 |
| Ccr2.4     | 1.96E-07 | 0.49961151 | 0.307 | 0.197 | 0.00322113 | 10 |
| Fam49b.3   | 1.96E-07 | -0.3782099 | 0.15  | 0.305 | 0.00322133 | 10 |
| Capza2.4   | 2.17E-07 | -0.3655839 | 0.116 | 0.263 | 0.0035663  | 10 |
| Prdx1.4    | 2.30E-07 | -0.3492531 | 0.208 | 0.386 | 0.00377838 | 10 |
| Ndufv3.1   | 2.77E-07 | 0.5646907  | 0.317 | 0.224 | 0.00455936 | 10 |
| Stat3.1    | 2.80E-07 | -0.4313868 | 0.113 | 0.251 | 0.00459759 | 10 |
| Psme2.5    | 2.81E-07 | 0.44598172 | 0.423 | 0.331 | 0.00462551 | 10 |
| Dock2.3    | 2.82E-07 | 0.55039787 | 0.341 | 0.247 | 0.00464565 | 10 |
| Gltp.6     | 3.51E-07 | -0.3047059 | 0.116 | 0.263 | 0.0057747  | 10 |
| S100a13.3  | 3.89E-07 | 0.56586731 | 0.321 | 0.228 | 0.00639766 | 10 |
| Ndufa13.3  | 4.51E-07 | 0.39062276 | 0.478 | 0.398 | 0.00741598 | 10 |
| Gm2a.10    | 5.17E-07 | -0.4632277 | 0.15  | 0.292 | 0.00850342 | 10 |

|            |            |            |       |       |            |    |
|------------|------------|------------|-------|-------|------------|----|
| Cd37.8     | 6.18E-07   | 0.32276629 | 0.437 | 0.325 | 0.01017332 | 10 |
| Limd2.6    | 6.43E-07   | 0.42994973 | 0.447 | 0.352 | 0.01057636 | 10 |
| Ahnak.7    | 6.75E-07   | 0.28929317 | 0.648 | 0.543 | 0.01110314 | 10 |
| Rap1a.2    | 7.73E-07   | -0.3024799 | 0.137 | 0.28  | 0.01272113 | 10 |
| Gabarap.4  | 9.00E-07   | -0.292373  | 0.389 | 0.572 | 0.01480391 | 10 |
| Rpl5.4     | 1.00E-06   | 0.29512856 | 0.727 | 0.717 | 0.01646377 | 10 |
| Spcs2      | 1.05E-06   | 0.55865758 | 0.287 | 0.198 | 0.01720468 | 10 |
| Dock10.2   | 1.15E-06   | 0.4363806  | 0.294 | 0.199 | 0.01885896 | 10 |
| Ldha.5     | 1.70E-06   | 0.38432341 | 0.427 | 0.336 | 0.02791858 | 10 |
| Ptpn1.2    | 2.40E-06   | -0.3469509 | 0.119 | 0.251 | 0.03940342 | 10 |
| Krtcap2.2  | 2.63E-06   | 0.46123572 | 0.379 | 0.293 | 0.04333716 | 10 |
| Selenow    | 3.42E-06   | 0.41286652 | 0.481 | 0.432 | 0.05617787 | 10 |
| Gng5.5     | 4.99E-06   | -0.2554861 | 0.427 | 0.603 | 0.08213763 | 10 |
| Sqstm1.3   | 4.99E-06   | -0.3572859 | 0.242 | 0.387 | 0.0821546  | 10 |
| Cnn2.4     | 5.34E-06   | 0.43271608 | 0.416 | 0.345 | 0.08788009 | 10 |
| Srsf5.1    | 5.40E-06   | -0.2976108 | 0.215 | 0.371 | 0.08888187 | 10 |
| Calm2.7    | 6.63E-06   | -0.3391287 | 0.242 | 0.392 | 0.10912026 | 10 |
| Wasf2      | 7.92E-06   | -0.2968142 | 0.16  | 0.297 | 0.13034746 | 10 |
| Cnbp.7     | 8.44E-06   | 0.35043834 | 0.495 | 0.427 | 0.13890101 | 10 |
| Smdt1.6    | 9.40E-06   | -0.2775123 | 0.212 | 0.358 | 0.15461085 | 10 |
| Cdk2ap2.6  | 9.72E-06   | 0.48215696 | 0.345 | 0.262 | 0.15994952 | 10 |
| Ptp4a2.4   | 9.87E-06   | -0.2708299 | 0.164 | 0.303 | 0.16230781 | 10 |
| Ptpn6.6    | 1.01E-05   | -0.2788407 | 0.133 | 0.263 | 0.16685885 | 10 |
| Vasp.1     | 1.02E-05   | 0.44241635 | 0.263 | 0.18  | 0.16810815 | 10 |
| Clic1.3    | 1.42E-05   | 0.33442532 | 0.546 | 0.502 | 0.23425653 | 10 |
| Syng2.7    | 1.66E-05   | -0.3172498 | 0.13  | 0.252 | 0.27235984 | 10 |
| Aes        | 1.67E-05   | 0.49788702 | 0.287 | 0.211 | 0.27441353 | 10 |
| Rnf187     | 1.87E-05   | 0.48294812 | 0.266 | 0.189 | 0.30710186 | 10 |
| Hectd1     | 2.38E-05   | 0.40221443 | 0.253 | 0.173 | 0.39158593 | 10 |
| Tmem59     | 3.12E-05   | 0.47995375 | 0.307 | 0.235 | 0.51398011 | 10 |
| Arl6ip1.3  | 3.20E-05   | 0.37116109 | 0.41  | 0.337 | 0.52583805 | 10 |
| Tmed2      | 3.33E-05   | 0.40774442 | 0.331 | 0.256 | 0.54819712 | 10 |
| Xist.3     | 3.52E-05   | 0.35500159 | 0.515 | 0.473 | 0.5797218  | 10 |
| Serinc3.10 | 3.91E-05   | -0.3737854 | 0.235 | 0.362 | 0.64383606 | 10 |
| Jpt1       | 4.13E-05   | -0.2585204 | 0.191 | 0.326 | 0.6793405  | 10 |
| Dusp5.5    | 4.14E-05   | 0.35550338 | 0.311 | 0.227 | 0.68085855 | 10 |
| Vps37b.7   | 5.13E-05   | 0.31425448 | 0.334 | 0.24  | 0.84372038 | 10 |
| Prdx5.6    | 5.27E-05   | -0.2932058 | 0.208 | 0.34  | 0.86726849 | 10 |
| Rbm3.4     | 5.63E-05   | 0.29523696 | 0.587 | 0.551 | 0.92639882 | 10 |
| Cytip.7    | 6.01E-05   | -0.3448902 | 0.212 | 0.332 | 0.98814083 | 10 |
| Bcl2a1b.2  | 6.76E-05   | 0.42432868 | 0.273 | 0.196 | 1          | 10 |
| Btg1.5     | 0.00010108 | -0.3638515 | 0.468 | 0.577 | 1          | 10 |
| Vps28.2    | 0.00011032 | 0.47522663 | 0.259 | 0.194 | 1          | 10 |

|             |            |            |       |       |   |    |
|-------------|------------|------------|-------|-------|---|----|
| Gabarapl2.1 | 0.00012788 | 0.49220882 | 0.28  | 0.214 | 1 | 10 |
| Rpl4.5      | 0.00015059 | 0.28346793 | 0.652 | 0.644 | 1 | 10 |
| Sec11c.1    | 0.00020218 | 0.37934655 | 0.328 | 0.26  | 1 | 10 |
| Mif.5       | 0.00020868 | 0.37258752 | 0.311 | 0.246 | 1 | 10 |
| Dnajc3      | 0.00022877 | 0.4267404  | 0.297 | 0.234 | 1 | 10 |
| Prkar1a.2   | 0.00029699 | 0.39850647 | 0.294 | 0.228 | 1 | 10 |
| Fis1.3      | 0.00029804 | 0.3866078  | 0.355 | 0.297 | 1 | 10 |
| Arhgap45.5  | 0.00031885 | 0.34957729 | 0.379 | 0.312 | 1 | 10 |
| Sdf4        | 0.00034905 | 0.36471273 | 0.273 | 0.211 | 1 | 10 |
| Atp5b.3     | 0.00040542 | 0.37913839 | 0.403 | 0.358 | 1 | 10 |
| Gpsm3.1     | 0.00041103 | 0.49769528 | 0.266 | 0.207 | 1 | 10 |
| Selenof.1   | 0.00041425 | 0.43392391 | 0.331 | 0.279 | 1 | 10 |
| Cox5a.3     | 0.00048094 | 0.3423249  | 0.427 | 0.378 | 1 | 10 |
| Gnas.3      | 0.00049498 | 0.29127924 | 0.502 | 0.472 | 1 | 10 |
| Snrpg.3     | 0.0005266  | 0.39015305 | 0.324 | 0.27  | 1 | 10 |
| AY036118.5  | 0.00098724 | 0.26886325 | 0.805 | 0.783 | 1 | 10 |
| Psmb3.4     | 0.00102546 | 0.337407   | 0.324 | 0.268 | 1 | 10 |
| Ppp1cc.2    | 0.00150608 | 0.38469284 | 0.263 | 0.207 | 1 | 10 |
| Ube2i.2     | 0.00180066 | 0.37085542 | 0.283 | 0.233 | 1 | 10 |
| Lars2       | 0.00214644 | 0.32968405 | 0.727 | 0.711 | 1 | 10 |
| Park7.3     | 0.00278427 | 0.37316598 | 0.307 | 0.264 | 1 | 10 |
| Pebp1       | 0.0034864  | 0.30146602 | 0.266 | 0.215 | 1 | 10 |
| Tma7.3      | 0.00368068 | 0.36069614 | 0.365 | 0.335 | 1 | 10 |
| Gsta4.3     | 0.00383654 | 0.28533922 | 0.28  | 0.223 | 1 | 10 |
| Arhgef1.3   | 0.0041171  | 0.33495492 | 0.263 | 0.212 | 1 | 10 |
| Atp5c1.3    | 0.00440066 | 0.33425009 | 0.379 | 0.342 | 1 | 10 |
| Cox6c.2     | 0.00441748 | 0.29778327 | 0.461 | 0.447 | 1 | 10 |
| Myl12a.3    | 0.00443607 | 0.35578408 | 0.413 | 0.392 | 1 | 10 |
| Tmbim6.1    | 0.0044906  | 0.26817381 | 0.444 | 0.425 | 1 | 10 |
| Grcc10.1    | 0.00496611 | 0.30274453 | 0.42  | 0.399 | 1 | 10 |
| Cyb5a.1     | 0.00502248 | 0.33966122 | 0.27  | 0.224 | 1 | 10 |
| Akr1b3.1    | 0.00604066 | 0.33595253 | 0.256 | 0.21  | 1 | 10 |
| Hmgbl.4     | 0.00764981 | 0.28230468 | 0.44  | 0.419 | 1 | 10 |
| Arf6.3      | 0.00840214 | 0.29575333 | 0.287 | 0.244 | 1 | 10 |
| Hist1h2ap   | 0          | 2.40141717 | 0.672 | 0.034 | 0 | 11 |
| Ube2c       | 0          | 2.11318764 | 0.699 | 0.006 | 0 | 11 |
| Mki67       | 0          | 2.03180868 | 0.699 | 0.019 | 0 | 11 |
| Top2a       | 0          | 1.97890132 | 0.782 | 0.012 | 0 | 11 |
| Pclaf       | 0          | 1.92494816 | 0.716 | 0.011 | 0 | 11 |
| Stmn1       | 0          | 1.8670971  | 0.747 | 0.026 | 0 | 11 |
| Birc5       | 0          | 1.73499038 | 0.668 | 0.006 | 0 | 11 |
| Hist1h1b    | 0          | 1.66648045 | 0.437 | 0.013 | 0 | 11 |
| Hist1h2af   | 0          | 1.52148756 | 0.284 | 0.001 | 0 | 11 |

|           |           |            |       |       |           |    |
|-----------|-----------|------------|-------|-------|-----------|----|
| Cenpf     | 0         | 1.44113136 | 0.472 | 0.002 | 0         | 11 |
| Cks1b     | 0         | 1.35609931 | 0.568 | 0.024 | 0         | 11 |
| Ccnb2     | 0         | 1.25218713 | 0.472 | 0.005 | 0         | 11 |
| Ccna2     | 0         | 1.23258396 | 0.454 | 0.002 | 0         | 11 |
| Cdca8     | 0         | 1.17352292 | 0.41  | 0.007 | 0         | 11 |
| Cdca3     | 0         | 1.15953113 | 0.445 | 0.003 | 0         | 11 |
| Tpx2      | 0         | 1.13000706 | 0.358 | 0.004 | 0         | 11 |
| Hist1h2ab | 0         | 1.05385286 | 0.258 | 0.002 | 0         | 11 |
| Kif11     | 0         | 1.04414528 | 0.376 | 0.003 | 0         | 11 |
| Ncapd2    | 0         | 1.02648879 | 0.41  | 0.01  | 0         | 11 |
| Spc24     | 0         | 1.02350079 | 0.358 | 0.005 | 0         | 11 |
| Aurkb     | 0         | 0.96155246 | 0.358 | 0.008 | 0         | 11 |
| Prc1      | 0         | 0.96114986 | 0.328 | 0.004 | 0         | 11 |
| Rrm2      | 0         | 0.95600974 | 0.31  | 0.004 | 0         | 11 |
| Cdk1      | 0         | 0.93210464 | 0.297 | 0.004 | 0         | 11 |
| Tk1       | 0         | 0.89376603 | 0.328 | 0.007 | 0         | 11 |
| Cenpe     | 0         | 0.88370106 | 0.31  | 0.003 | 0         | 11 |
| Nusap1    | 0         | 0.83641516 | 0.279 | 0.002 | 0         | 11 |
| Kif15     | 0         | 0.7549832  | 0.262 | 0.003 | 0         | 11 |
| Bub1b     | 2.86E-304 | 0.71612577 | 0.266 | 0.004 | 4.70E-300 | 11 |
| Cenpm     | 2.66E-276 | 0.86681277 | 0.306 | 0.007 | 4.38E-272 | 11 |
| Ckap2l    | 1.45E-270 | 0.84113396 | 0.284 | 0.006 | 2.39E-266 | 11 |
| Smc2      | 5.12E-270 | 1.17858496 | 0.533 | 0.032 | 8.43E-266 | 11 |
| H2afx     | 2.60E-251 | 1.83168247 | 0.703 | 0.072 | 4.28E-247 | 11 |
| Asf1b     | 1.01E-245 | 0.79997173 | 0.284 | 0.007 | 1.66E-241 | 11 |
| Racgap1   | 4.95E-214 | 0.99440592 | 0.393 | 0.021 | 8.15E-210 | 11 |
| Knstrn    | 2.36E-207 | 0.725128   | 0.271 | 0.009 | 3.88E-203 | 11 |
| Hist1h2ae | 1.63E-206 | 1.17146787 | 0.349 | 0.017 | 2.68E-202 | 11 |
| Incenp    | 1.08E-205 | 0.97048568 | 0.393 | 0.022 | 1.77E-201 | 11 |
| Kif23     | 3.39E-191 | 1.04811097 | 0.349 | 0.019 | 5.58E-187 | 11 |
| Hmgb2.4   | 3.44E-191 | 1.9663148  | 0.952 | 0.229 | 5.66E-187 | 11 |
| Cks2      | 5.43E-187 | 1.0714944  | 0.467 | 0.038 | 8.93E-183 | 11 |
| Tacc3     | 2.70E-180 | 0.69964022 | 0.279 | 0.012 | 4.44E-176 | 11 |
| Tubb5.3   | 3.07E-158 | 1.77905188 | 0.943 | 0.277 | 5.05E-154 | 11 |
| Lmnb1.1   | 1.22E-154 | 1.2068708  | 0.62  | 0.085 | 2.00E-150 | 11 |
| Cenpw     | 2.61E-147 | 0.65084857 | 0.253 | 0.013 | 4.30E-143 | 11 |
| Ezh2      | 1.15E-145 | 0.84077676 | 0.371 | 0.03  | 1.90E-141 | 11 |
| Tuba1b.4  | 3.71E-145 | 1.79448167 | 0.93  | 0.302 | 6.10E-141 | 11 |
| Cenpa     | 6.85E-141 | 1.12367621 | 0.493 | 0.057 | 1.13E-136 | 11 |
| Smc4      | 3.16E-139 | 1.04624289 | 0.611 | 0.088 | 5.20E-135 | 11 |
| H2afv     | 8.58E-136 | 1.44651516 | 0.847 | 0.209 | 1.41E-131 | 11 |
| Tmpo      | 1.04E-131 | 1.15753364 | 0.563 | 0.082 | 1.72E-127 | 11 |
| Hist1h1d  | 4.24E-125 | 1.57281419 | 0.279 | 0.02  | 6.97E-121 | 11 |

|            |           |            |       |       |           |    |
|------------|-----------|------------|-------|-------|-----------|----|
| Rrm1       | 7.07E-124 | 0.84174772 | 0.336 | 0.029 | 1.16E-119 | 11 |
| Ccdc34     | 2.54E-120 | 0.79492019 | 0.345 | 0.032 | 4.17E-116 | 11 |
| Gmnn       | 9.55E-119 | 0.75488461 | 0.288 | 0.022 | 1.57E-114 | 11 |
| Kpna2      | 1.68E-116 | 0.81323168 | 0.31  | 0.026 | 2.76E-112 | 11 |
| Hmgn2      | 7.40E-111 | 1.13440781 | 0.668 | 0.132 | 1.22E-106 | 11 |
| H2afz.10   | 2.58E-108 | 1.35393435 | 0.987 | 0.576 | 4.25E-104 | 11 |
| Hist1h1e.1 | 4.91E-103 | 1.6298939  | 0.52  | 0.087 | 8.08E-99  | 11 |
| Ube2s      | 3.24E-93  | 0.98214057 | 0.642 | 0.139 | 5.33E-89  | 11 |
| Ptma.3     | 9.94E-93  | 1.05644443 | 0.987 | 0.777 | 1.64E-88  | 11 |
| Hjurp      | 1.25E-89  | 0.61221529 | 0.258 | 0.024 | 2.06E-85  | 11 |
| Nucks1     | 1.36E-87  | 0.89303906 | 0.546 | 0.104 | 2.23E-83  | 11 |
| Nsd2       | 7.44E-87  | 0.71824191 | 0.293 | 0.032 | 1.22E-82  | 11 |
| Dut        | 1.24E-84  | 0.84924029 | 0.362 | 0.05  | 2.04E-80  | 11 |
| Selenoh    | 1.97E-84  | 0.90401519 | 0.541 | 0.108 | 3.24E-80  | 11 |
| Gm10282    | 2.67E-82  | 0.59117208 | 0.293 | 0.033 | 4.39E-78  | 11 |
| Hmgb1.5    | 8.75E-82  | 1.09208782 | 0.943 | 0.404 | 1.44E-77  | 11 |
| Ckap5      | 6.81E-80  | 0.71255858 | 0.301 | 0.036 | 1.12E-75  | 11 |
| Tubb4b.1   | 7.87E-80  | 1.04546608 | 0.62  | 0.148 | 1.29E-75  | 11 |
| Anp32b.3   | 9.94E-78  | 1.02020229 | 0.838 | 0.29  | 1.64E-73  | 11 |
| Anp32e     | 4.80E-74  | 0.94659979 | 0.585 | 0.141 | 7.89E-70  | 11 |
| Atad2      | 8.43E-72  | 0.70993676 | 0.293 | 0.038 | 1.39E-67  | 11 |
| Mcm7       | 1.30E-70  | 0.67591174 | 0.262 | 0.031 | 2.15E-66  | 11 |
| Tipin      | 4.01E-68  | 0.64823993 | 0.279 | 0.037 | 6.60E-64  | 11 |
| Ran.4      | 6.18E-66  | 0.87797476 | 0.808 | 0.284 | 1.02E-61  | 11 |
| Nrm        | 4.49E-64  | 0.60936178 | 0.341 | 0.056 | 7.38E-60  | 11 |
| Dek        | 1.73E-61  | 0.88559697 | 0.655 | 0.201 | 2.85E-57  | 11 |
| Cdkn2d     | 3.77E-61  | 0.59043068 | 0.314 | 0.05  | 6.21E-57  | 11 |
| Usp1       | 1.02E-60  | 0.61983972 | 0.345 | 0.06  | 1.68E-56  | 11 |
| Hist1h1c   | 4.27E-60  | 1.01489921 | 0.402 | 0.083 | 7.03E-56  | 11 |
| Rangap1    | 1.15E-56  | 0.53773629 | 0.275 | 0.042 | 1.90E-52  | 11 |
| Dnmt1      | 1.72E-49  | 0.57995482 | 0.345 | 0.07  | 2.83E-45  | 11 |
| Alyref     | 1.87E-46  | 0.62935493 | 0.319 | 0.065 | 3.08E-42  | 11 |
| Tagln2.7   | 9.26E-45  | 0.73214689 | 0.895 | 0.478 | 1.52E-40  | 11 |
| Nap1l1.5   | 3.29E-44  | 0.73289962 | 0.677 | 0.248 | 5.42E-40  | 11 |
| Ncaph2     | 8.97E-44  | 0.58759528 | 0.332 | 0.071 | 1.48E-39  | 11 |
| Tuba1c     | 1.75E-43  | 0.77476671 | 0.537 | 0.17  | 2.88E-39  | 11 |
| Calm3.1    | 3.78E-43  | 0.60667609 | 0.672 | 0.238 | 6.21E-39  | 11 |
| Ppia.4     | 4.00E-43  | 0.58222281 | 0.987 | 0.886 | 6.58E-39  | 11 |
| Lsm2       | 1.22E-41  | 0.4599871  | 0.319 | 0.069 | 2.01E-37  | 11 |
| Anapc5     | 1.37E-41  | 0.58805036 | 0.476 | 0.135 | 2.26E-37  | 11 |
| Plp2.4     | 3.65E-41  | 0.55937714 | 0.498 | 0.146 | 6.01E-37  | 11 |
| Rad21      | 2.64E-40  | 0.57669149 | 0.406 | 0.106 | 4.34E-36  | 11 |
| Hdgf       | 1.02E-39  | 0.55038018 | 0.428 | 0.117 | 1.68E-35  | 11 |

|           |          |            |       |       |          |    |
|-----------|----------|------------|-------|-------|----------|----|
| Dnajc9    | 1.03E-39 | 0.4756801  | 0.266 | 0.052 | 1.69E-35 | 11 |
| Dctpp1.1  | 1.17E-39 | 0.63607344 | 0.306 | 0.069 | 1.92E-35 | 11 |
| Csrp1     | 4.46E-39 | 0.51565679 | 0.288 | 0.062 | 7.34E-35 | 11 |
| Snrpd1    | 1.24E-38 | 0.529598   | 0.498 | 0.151 | 2.04E-34 | 11 |
| Hpf1      | 1.69E-38 | 0.41386618 | 0.279 | 0.058 | 2.77E-34 | 11 |
| Ywhah.4   | 1.87E-38 | 0.6606124  | 0.664 | 0.251 | 3.08E-34 | 11 |
| Cbx3      | 9.78E-37 | 0.42844822 | 0.253 | 0.051 | 1.61E-32 | 11 |
| Jpt1.1    | 1.40E-35 | 0.61451001 | 0.721 | 0.309 | 2.31E-31 | 11 |
| Nudt21    | 2.14E-35 | 0.5293271  | 0.432 | 0.127 | 3.52E-31 | 11 |
| Banf1     | 4.80E-35 | 0.57292282 | 0.568 | 0.202 | 7.89E-31 | 11 |
| Maz       | 8.25E-35 | 0.40855342 | 0.31  | 0.074 | 1.36E-30 | 11 |
| Pcna      | 1.23E-34 | 0.62679342 | 0.341 | 0.09  | 2.02E-30 | 11 |
| Pmf1      | 3.26E-34 | 0.40006939 | 0.275 | 0.061 | 5.36E-30 | 11 |
| Txn1.4    | 4.28E-34 | 0.65554604 | 0.611 | 0.24  | 7.04E-30 | 11 |
| Hnrnpab   | 5.64E-34 | 0.62274961 | 0.716 | 0.308 | 9.28E-30 | 11 |
| H2afy.6   | 5.93E-34 | 0.73813509 | 0.603 | 0.242 | 9.76E-30 | 11 |
| Hint1.1   | 9.30E-34 | 0.59324044 | 0.873 | 0.448 | 1.53E-29 | 11 |
| Rbm3.5    | 2.53E-33 | 0.60367048 | 0.904 | 0.542 | 4.16E-29 | 11 |
| Crip1.9   | 3.21E-33 | 0.7125057  | 0.961 | 0.713 | 5.28E-29 | 11 |
| Arl6ip1.4 | 4.64E-33 | 0.83659988 | 0.699 | 0.329 | 7.63E-29 | 11 |
| Snrpg.4   | 9.66E-33 | 0.52656791 | 0.659 | 0.261 | 1.59E-28 | 11 |
| Siva1     | 1.17E-32 | 0.49148996 | 0.354 | 0.097 | 1.92E-28 | 11 |
| Ranbp1    | 3.74E-32 | 0.65582197 | 0.485 | 0.171 | 6.15E-28 | 11 |
| Mrpl18    | 8.87E-32 | 0.49101876 | 0.376 | 0.109 | 1.46E-27 | 11 |
| Lsm5      | 1.21E-31 | 0.38318863 | 0.319 | 0.082 | 1.99E-27 | 11 |
| Actg1.6   | 3.01E-31 | 0.443465   | 0.991 | 0.899 | 4.95E-27 | 11 |
| Sae1      | 1.26E-30 | 0.34420876 | 0.253 | 0.057 | 2.07E-26 | 11 |
| Bub3      | 1.87E-30 | 0.49666948 | 0.332 | 0.093 | 3.07E-26 | 11 |
| Smc6      | 5.39E-30 | 0.45540166 | 0.384 | 0.115 | 8.87E-26 | 11 |
| Dnajc2    | 6.41E-30 | 0.4839798  | 0.362 | 0.107 | 1.05E-25 | 11 |
| Tmsb10.9  | 1.18E-28 | 0.55854297 | 0.983 | 0.78  | 1.93E-24 | 11 |
| Slbp      | 1.44E-28 | 0.49240674 | 0.367 | 0.112 | 2.36E-24 | 11 |
| Pa2g4     | 1.91E-28 | 0.42978789 | 0.437 | 0.144 | 3.14E-24 | 11 |
| Lbr       | 2.46E-28 | 0.45476352 | 0.354 | 0.106 | 4.05E-24 | 11 |
| Lgals1.8  | 3.74E-28 | 0.59794245 | 0.76  | 0.392 | 6.15E-24 | 11 |
| Smc1a     | 4.39E-28 | 0.41458987 | 0.437 | 0.145 | 7.22E-24 | 11 |
| Srsf3     | 4.44E-28 | 0.53021444 | 0.585 | 0.239 | 7.30E-24 | 11 |
| Hnrnpa3.1 | 5.08E-28 | 0.55548408 | 0.86  | 0.492 | 8.35E-24 | 11 |
| Anapc11.1 | 1.01E-27 | 0.51888966 | 0.563 | 0.224 | 1.66E-23 | 11 |
| Exosc8    | 2.44E-27 | 0.402191   | 0.262 | 0.067 | 4.01E-23 | 11 |
| Mrpl51    | 3.21E-27 | 0.40046872 | 0.306 | 0.085 | 5.28E-23 | 11 |
| Anxa2.10  | 1.05E-26 | 0.5614311  | 0.603 | 0.265 | 1.73E-22 | 11 |
| Snrpe.3   | 1.44E-26 | 0.48978249 | 0.668 | 0.296 | 2.37E-22 | 11 |

|               |          |            |       |       |          |    |
|---------------|----------|------------|-------|-------|----------|----|
| S100a10.9     | 1.80E-26 | 0.54852498 | 0.808 | 0.449 | 2.96E-22 | 11 |
| Rps27l.6      | 2.27E-26 | 0.50647113 | 0.664 | 0.297 | 3.73E-22 | 11 |
| S100a4.4      | 6.29E-26 | 0.49451308 | 0.463 | 0.173 | 1.04E-21 | 11 |
| Erh.2         | 6.46E-26 | 0.49302865 | 0.594 | 0.248 | 1.06E-21 | 11 |
| Gapdh.5       | 6.58E-26 | 0.50330311 | 0.948 | 0.706 | 1.08E-21 | 11 |
| Vim.9         | 1.38E-25 | 0.62773427 | 0.9   | 0.614 | 2.28E-21 | 11 |
| Ssrp1         | 2.37E-25 | 0.44423016 | 0.38  | 0.125 | 3.90E-21 | 11 |
| Lsm3          | 2.77E-25 | 0.35561343 | 0.288 | 0.081 | 4.56E-21 | 11 |
| Lsm4.3        | 4.05E-25 | 0.38809046 | 0.576 | 0.229 | 6.67E-21 | 11 |
| Actn4         | 8.32E-25 | 0.48809832 | 0.367 | 0.122 | 1.37E-20 | 11 |
| Elob.1        | 9.39E-25 | 0.48241888 | 0.821 | 0.425 | 1.55E-20 | 11 |
| Ctcf          | 9.82E-25 | 0.32817931 | 0.319 | 0.095 | 1.62E-20 | 11 |
| Ddx39         | 2.23E-24 | 0.35202402 | 0.271 | 0.075 | 3.66E-20 | 11 |
| Clic1.4       | 3.20E-24 | 0.50484239 | 0.834 | 0.494 | 5.26E-20 | 11 |
| Med30         | 9.29E-24 | 0.35901539 | 0.279 | 0.08  | 1.53E-19 | 11 |
| Raly.1        | 1.18E-23 | 0.46987335 | 0.537 | 0.222 | 1.94E-19 | 11 |
| Psip1         | 5.45E-23 | 0.43517216 | 0.306 | 0.096 | 8.96E-19 | 11 |
| Pfdn6         | 2.25E-22 | 0.30378844 | 0.284 | 0.084 | 3.70E-18 | 11 |
| Actb.5        | 4.40E-22 | 0.26985404 | 1     | 0.993 | 7.23E-18 | 11 |
| Mrpl28        | 4.68E-22 | 0.35564977 | 0.314 | 0.1   | 7.71E-18 | 11 |
| 1810037l17Ril | 5.89E-22 | 0.4286762  | 0.607 | 0.267 | 9.69E-18 | 11 |
| Nudc          | 1.01E-21 | 0.4153959  | 0.371 | 0.132 | 1.66E-17 | 11 |
| Pdap1         | 1.06E-21 | 0.40549445 | 0.323 | 0.107 | 1.75E-17 | 11 |
| Mrpl57        | 1.27E-21 | 0.3833173  | 0.358 | 0.125 | 2.10E-17 | 11 |
| Lsp1.9        | 2.74E-21 | 0.44621181 | 0.729 | 0.386 | 4.51E-17 | 11 |
| Set.1         | 3.92E-21 | 0.44671168 | 0.515 | 0.221 | 6.45E-17 | 11 |
| Hnrnpd        | 4.34E-21 | 0.36653388 | 0.349 | 0.122 | 7.13E-17 | 11 |
| Cox5b.3       | 7.97E-21 | 0.39985126 | 0.803 | 0.424 | 1.31E-16 | 11 |
| Ptms.7        | 1.18E-20 | 0.53303009 | 0.581 | 0.279 | 1.94E-16 | 11 |
| Sf3b5         | 1.38E-20 | 0.38284989 | 0.55  | 0.239 | 2.27E-16 | 11 |
| Snrpc         | 1.53E-20 | 0.34703358 | 0.362 | 0.129 | 2.51E-16 | 11 |
| Cbfb          | 1.62E-20 | 0.35259522 | 0.279 | 0.088 | 2.66E-16 | 11 |
| Rbbp7         | 1.78E-20 | 0.39657479 | 0.367 | 0.134 | 2.93E-16 | 11 |
| Ybx1.2        | 2.38E-20 | 0.46787428 | 0.865 | 0.545 | 3.91E-16 | 11 |
| Sumo2.2       | 2.52E-20 | 0.44143825 | 0.747 | 0.401 | 4.14E-16 | 11 |
| Ndufb7.1      | 3.15E-20 | 0.39675441 | 0.568 | 0.255 | 5.19E-16 | 11 |
| Trim28        | 3.57E-20 | 0.2981271  | 0.328 | 0.111 | 5.88E-16 | 11 |
| Lsm6          | 7.44E-20 | 0.33725042 | 0.41  | 0.157 | 1.22E-15 | 11 |
| Baz1b         | 7.59E-20 | 0.28224862 | 0.31  | 0.103 | 1.25E-15 | 11 |
| Oaz1.2        | 7.70E-20 | 0.34740993 | 0.969 | 0.77  | 1.27E-15 | 11 |
| Vdac1         | 9.18E-20 | 0.34330106 | 0.297 | 0.098 | 1.51E-15 | 11 |
| Ndufb8.1      | 1.03E-19 | 0.40681007 | 0.555 | 0.254 | 1.70E-15 | 11 |
| Gnb2.2        | 1.10E-19 | 0.40944956 | 0.782 | 0.417 | 1.81E-15 | 11 |

|             |          |            |       |       |          |    |
|-------------|----------|------------|-------|-------|----------|----|
| Sms         | 2.23E-19 | 0.31965262 | 0.258 | 0.081 | 3.68E-15 | 11 |
| Calm2.8     | 4.73E-19 | 0.43099203 | 0.712 | 0.377 | 7.78E-15 | 11 |
| Smdt1.7     | 6.45E-19 | 0.41315165 | 0.672 | 0.343 | 1.06E-14 | 11 |
| Atpif1.10   | 6.63E-19 | 0.38135186 | 0.642 | 0.305 | 1.09E-14 | 11 |
| Olfm1.3     | 1.95E-18 | 0.45740575 | 0.288 | 0.101 | 3.21E-14 | 11 |
| Sept9.3     | 2.50E-18 | 0.32060043 | 0.389 | 0.152 | 4.12E-14 | 11 |
| Tnip3.2     | 2.97E-18 | 0.3997916  | 0.328 | 0.121 | 4.89E-14 | 11 |
| Snrpd2      | 3.10E-18 | 0.25564028 | 0.463 | 0.189 | 5.10E-14 | 11 |
| Cenpx       | 3.98E-18 | 0.37594463 | 0.397 | 0.16  | 6.55E-14 | 11 |
| Gng10.2     | 5.61E-18 | 0.36373585 | 0.472 | 0.206 | 9.24E-14 | 11 |
| Pycard.3    | 6.02E-18 | 0.38018115 | 0.463 | 0.197 | 9.91E-14 | 11 |
| Atp5g2      | 8.43E-18 | 0.3980861  | 0.817 | 0.497 | 1.39E-13 | 11 |
| Snrpf.2     | 1.04E-17 | 0.31063679 | 0.541 | 0.241 | 1.72E-13 | 11 |
| Mapre1      | 1.07E-17 | 0.31316777 | 0.384 | 0.152 | 1.76E-13 | 11 |
| Pgam1.2     | 1.26E-17 | 0.3816014  | 0.376 | 0.152 | 2.08E-13 | 11 |
| Purb        | 1.65E-17 | 0.30745523 | 0.319 | 0.116 | 2.72E-13 | 11 |
| Hnrnpa2b1.2 | 2.03E-17 | 0.39923757 | 0.843 | 0.545 | 3.34E-13 | 11 |
| Dazap1      | 2.80E-17 | 0.28994936 | 0.275 | 0.094 | 4.60E-13 | 11 |
| Nol7.4      | 3.17E-17 | 0.30417227 | 0.563 | 0.261 | 5.21E-13 | 11 |
| Ssna1       | 3.60E-17 | 0.28636365 | 0.266 | 0.089 | 5.92E-13 | 11 |
| Kpnb1       | 3.72E-17 | 0.3026206  | 0.297 | 0.106 | 6.13E-13 | 11 |
| Coro1c      | 5.46E-17 | 0.29474284 | 0.279 | 0.097 | 8.99E-13 | 11 |
| Tpm4.3      | 5.66E-17 | 0.34855769 | 0.511 | 0.236 | 9.32E-13 | 11 |
| Tmsb4x.7    | 6.18E-17 | 0.27286466 | 1     | 0.993 | 1.02E-12 | 11 |
| Hnrnpul2    | 6.84E-17 | 0.30980958 | 0.424 | 0.177 | 1.13E-12 | 11 |
| Aurkaip1    | 8.70E-17 | 0.31230635 | 0.402 | 0.164 | 1.43E-12 | 11 |
| Zyx.9       | 1.07E-16 | 0.29855864 | 0.555 | 0.254 | 1.76E-12 | 11 |
| Rnaseh2c    | 1.77E-16 | 0.35189453 | 0.341 | 0.132 | 2.91E-12 | 11 |
| Stub1       | 1.83E-16 | 0.32949225 | 0.384 | 0.157 | 3.02E-12 | 11 |
| Cd24a.2     | 1.88E-16 | 0.56086553 | 0.323 | 0.13  | 3.09E-12 | 11 |
| Nono        | 1.99E-16 | 0.28565744 | 0.384 | 0.155 | 3.27E-12 | 11 |
| Cdk4        | 2.43E-16 | 0.36068767 | 0.345 | 0.136 | 4.00E-12 | 11 |
| Cyca.5      | 2.46E-16 | 0.33660622 | 0.511 | 0.238 | 4.05E-12 | 11 |
| Vdac3       | 2.52E-16 | 0.31119814 | 0.301 | 0.112 | 4.15E-12 | 11 |
| Hsp90aa1    | 3.31E-16 | 0.38233913 | 0.646 | 0.333 | 5.45E-12 | 11 |
| Srsf2       | 3.67E-16 | 0.34774014 | 0.55  | 0.268 | 6.04E-12 | 11 |
| Tmem14c.1   | 4.19E-16 | 0.30120598 | 0.406 | 0.171 | 6.89E-12 | 11 |
| Cdkn1a.4    | 5.92E-16 | 0.4673468  | 0.467 | 0.224 | 9.74E-12 | 11 |
| Cbfa2t3.2   | 6.13E-16 | 0.44424257 | 0.349 | 0.146 | 1.01E-11 | 11 |
| Cfl1.1      | 7.21E-16 | 0.32037727 | 0.961 | 0.783 | 1.19E-11 | 11 |
| Vps36       | 7.41E-16 | 0.30508344 | 0.262 | 0.093 | 1.22E-11 | 11 |
| Cox7a2.1    | 8.31E-16 | 0.32713157 | 0.646 | 0.335 | 1.37E-11 | 11 |
| Vars.1      | 1.20E-15 | 0.33486291 | 0.31  | 0.119 | 1.98E-11 | 11 |



|           |          |            |       |       |          |    |
|-----------|----------|------------|-------|-------|----------|----|
| Bax.1     | 1.32E-15 | 0.32878059 | 0.476 | 0.217 | 2.17E-11 | 11 |
| Trir.1    | 1.50E-15 | 0.32023493 | 0.476 | 0.218 | 2.46E-11 | 11 |
| Ccr2.5    | 2.49E-15 | 0.30320444 | 0.432 | 0.195 | 4.10E-11 | 11 |
| Dbi.6     | 2.71E-15 | 0.31015458 | 0.576 | 0.283 | 4.46E-11 | 11 |
| Smchd1    | 3.77E-15 | 0.3316477  | 0.323 | 0.13  | 6.20E-11 | 11 |
| Tra2b     | 4.38E-15 | 0.33248806 | 0.511 | 0.245 | 7.21E-11 | 11 |
| Tubb2a    | 5.04E-15 | 0.34854864 | 0.262 | 0.096 | 8.29E-11 | 11 |
| Rps27.7   | 5.33E-15 | -0.5032313 | 0.948 | 0.901 | 8.76E-11 | 11 |
| Ndufa11.1 | 5.41E-15 | 0.32753205 | 0.45  | 0.204 | 8.90E-11 | 11 |
| Srsf7     | 5.82E-15 | 0.31565473 | 0.459 | 0.209 | 9.58E-11 | 11 |
| Emp3.6    | 5.86E-15 | 0.36319132 | 0.738 | 0.425 | 9.64E-11 | 11 |
| Taf10     | 7.41E-15 | 0.28483646 | 0.319 | 0.126 | 1.22E-10 | 11 |
| Fam96a.1  | 8.32E-15 | 0.29816471 | 0.323 | 0.129 | 1.37E-10 | 11 |
| Il1b.9    | 1.39E-14 | 0.35196064 | 0.476 | 0.238 | 2.29E-10 | 11 |
| Gstm1.9   | 1.45E-14 | -0.7960031 | 0.515 | 0.65  | 2.39E-10 | 11 |
| Rwdd1     | 1.69E-14 | 0.2506852  | 0.376 | 0.158 | 2.79E-10 | 11 |
| Ywhae     | 1.77E-14 | 0.28536257 | 0.524 | 0.251 | 2.91E-10 | 11 |
| Pbrm1     | 1.86E-14 | 0.25650066 | 0.31  | 0.121 | 3.06E-10 | 11 |
| Traf1.1   | 2.12E-14 | 0.34135464 | 0.332 | 0.139 | 3.49E-10 | 11 |
| Atp5f1.1  | 2.57E-14 | 0.32152846 | 0.638 | 0.332 | 4.22E-10 | 11 |
| Id2.4     | 3.37E-14 | 0.4477394  | 0.428 | 0.208 | 5.54E-10 | 11 |
| Csnk2b    | 4.35E-14 | 0.25914967 | 0.41  | 0.182 | 7.15E-10 | 11 |
| Uqcr10.1  | 4.38E-14 | 0.38044542 | 0.524 | 0.265 | 7.21E-10 | 11 |
| Lgals3.10 | 4.46E-14 | 0.39786266 | 0.611 | 0.342 | 7.33E-10 | 11 |
| Rbbp4     | 4.50E-14 | 0.33706836 | 0.306 | 0.124 | 7.40E-10 | 11 |
| Atp5o.1.3 | 4.73E-14 | 0.28715632 | 0.493 | 0.237 | 7.78E-10 | 11 |
| Arhgdia   | 5.90E-14 | 0.32698392 | 0.694 | 0.382 | 9.71E-10 | 11 |
| Pkm.5     | 7.79E-14 | 0.27735467 | 0.594 | 0.3   | 1.28E-09 | 11 |
| Npm3      | 8.61E-14 | 0.26226919 | 0.31  | 0.126 | 1.42E-09 | 11 |
| Xist.4    | 8.70E-14 | 0.32475052 | 0.769 | 0.466 | 1.43E-09 | 11 |
| Apoe.10   | 1.04E-13 | -1.3432659 | 0.262 | 0.477 | 1.71E-09 | 11 |
| Cd44.3    | 1.62E-13 | 0.3217578  | 0.402 | 0.186 | 2.66E-09 | 11 |
| Uqcrfs1.1 | 1.70E-13 | 0.30440439 | 0.472 | 0.23  | 2.80E-09 | 11 |
| Atp5d.3   | 1.71E-13 | 0.3069764  | 0.742 | 0.429 | 2.82E-09 | 11 |
| Atp5g3.2  | 2.70E-13 | 0.34540332 | 0.725 | 0.45  | 4.43E-09 | 11 |
| Eif3l     | 2.77E-13 | 0.2555135  | 0.262 | 0.1   | 4.56E-09 | 11 |
| Preli1.3  | 2.96E-13 | 0.32956676 | 0.576 | 0.305 | 4.86E-09 | 11 |
| Naa38     | 2.98E-13 | 0.30877078 | 0.306 | 0.126 | 4.91E-09 | 11 |
| Cox6a1.2  | 3.56E-13 | 0.29357037 | 0.729 | 0.419 | 5.86E-09 | 11 |
| Atrx      | 4.79E-13 | 0.25665537 | 0.376 | 0.169 | 7.88E-09 | 11 |
| Flna.7    | 5.66E-13 | 0.25954757 | 0.568 | 0.29  | 9.31E-09 | 11 |
| H3f3a.7   | 6.17E-13 | 0.25452872 | 0.93  | 0.733 | 1.02E-08 | 11 |
| Serbp1.5  | 8.66E-13 | 0.29904481 | 0.677 | 0.376 | 1.42E-08 | 11 |

|            |          |            |       |       |            |    |
|------------|----------|------------|-------|-------|------------|----|
| Gnb1       | 9.14E-13 | 0.28684282 | 0.376 | 0.17  | 1.50E-08   | 11 |
| Fkbp2.2    | 1.07E-12 | 0.2606461  | 0.38  | 0.173 | 1.75E-08   | 11 |
| Gpx1.10    | 1.20E-12 | 0.38054573 | 0.852 | 0.708 | 1.98E-08   | 11 |
| Sh3bgrl3.5 | 1.63E-12 | 0.28762421 | 0.943 | 0.742 | 2.68E-08   | 11 |
| Gtf2h5     | 1.80E-12 | 0.25031066 | 0.301 | 0.126 | 2.96E-08   | 11 |
| Ptges3.1   | 1.88E-12 | 0.26042686 | 0.393 | 0.182 | 3.10E-08   | 11 |
| Sf3b2      | 1.95E-12 | 0.25065249 | 0.533 | 0.271 | 3.21E-08   | 11 |
| Cops9.1    | 2.56E-12 | 0.2536183  | 0.437 | 0.206 | 4.21E-08   | 11 |
| Tcp1.1     | 2.62E-12 | 0.26999098 | 0.38  | 0.176 | 4.31E-08   | 11 |
| S100a11.8  | 3.37E-12 | 0.27489638 | 0.677 | 0.39  | 5.54E-08   | 11 |
| Pcbp2      | 3.80E-12 | 0.2765772  | 0.755 | 0.442 | 6.25E-08   | 11 |
| Uqcrq.3    | 3.97E-12 | 0.28916174 | 0.603 | 0.328 | 6.54E-08   | 11 |
| Tep1.1     | 5.13E-12 | 0.32201722 | 0.266 | 0.111 | 8.44E-08   | 11 |
| Malat1.5   | 5.80E-12 | -0.4403021 | 0.926 | 0.937 | 9.54E-08   | 11 |
| Hnrnpf.2   | 6.16E-12 | 0.29541079 | 0.721 | 0.425 | 1.01E-07   | 11 |
| Atp5j2.2   | 6.21E-12 | 0.2643034  | 0.699 | 0.416 | 1.02E-07   | 11 |
| Hnrnpu.1   | 1.48E-11 | 0.31754281 | 0.629 | 0.356 | 2.43E-07   | 11 |
| Cotl1.4    | 1.97E-11 | 0.31085642 | 0.633 | 0.354 | 3.25E-07   | 11 |
| Myadm.2    | 2.19E-11 | 0.27417846 | 0.262 | 0.11  | 3.61E-07   | 11 |
| Snrpb.2    | 2.23E-11 | 0.2949488  | 0.507 | 0.271 | 3.66E-07   | 11 |
| Tpi1       | 2.42E-11 | 0.25828433 | 0.284 | 0.122 | 3.98E-07   | 11 |
| Psemb9.4   | 2.57E-11 | 0.2534442  | 0.459 | 0.235 | 4.22E-07   | 11 |
| Csf2ra.4   | 2.77E-11 | 0.29260058 | 0.31  | 0.14  | 4.56E-07   | 11 |
| Atox1.10   | 3.87E-11 | 0.26351924 | 0.738 | 0.448 | 6.36E-07   | 11 |
| Minos1.1   | 4.47E-11 | 0.25219847 | 0.397 | 0.193 | 7.36E-07   | 11 |
| Cd209a.1   | 5.35E-11 | 0.31968125 | 0.323 | 0.151 | 8.80E-07   | 11 |
| mt-Nd2.5   | 7.16E-11 | -0.4369839 | 0.856 | 0.796 | 1.18E-06   | 11 |
| Cmtm7.1    | 7.55E-11 | 0.26869386 | 0.428 | 0.216 | 1.24E-06   | 11 |
| Atp5j.1    | 1.12E-10 | 0.32090504 | 0.616 | 0.374 | 1.84E-06   | 11 |
| Naaa.2     | 1.75E-10 | 0.32160162 | 0.271 | 0.12  | 2.88E-06   | 11 |
| Itm2b.9    | 2.27E-10 | -0.6594742 | 0.86  | 0.785 | 3.73E-06   | 11 |
| Eef1a1.7   | 2.48E-10 | -0.2620035 | 0.991 | 0.98  | 4.08E-06   | 11 |
| Lsm12      | 3.85E-10 | 0.26806491 | 0.266 | 0.119 | 6.33E-06   | 11 |
| Ube2n      | 4.23E-10 | 0.25796569 | 0.297 | 0.138 | 6.95E-06   | 11 |
| Gm2a.11    | 6.19E-10 | 0.27908759 | 0.498 | 0.28  | 1.02E-05   | 11 |
| Selenop.10 | 8.17E-10 | -1.3215223 | 0.266 | 0.421 | 1.34E-05   | 11 |
| Ndufa4.1   | 8.41E-10 | 0.2724348  | 0.672 | 0.403 | 1.38E-05   | 11 |
| Junb.8     | 8.99E-10 | -0.4986872 | 0.834 | 0.843 | 1.48E-05   | 11 |
| Cox8a.1    | 2.27E-09 | 0.26873029 | 0.913 | 0.682 | 3.74E-05   | 11 |
| H2-D1.6    | 7.68E-06 | -0.3631097 | 0.807 | 0.891 | 0.12639878 | 13 |
| C1qa.10    | 3.56E-09 | -1.0332503 | 0.166 | 0.335 | 5.85E-05   | 11 |
| C1qc.10    | 3.72E-09 | -1.0989771 | 0.175 | 0.339 | 6.12E-05   | 11 |
| Wdfy4.3    | 4.92E-09 | 0.26469789 | 0.279 | 0.134 | 8.09E-05   | 11 |

|             |            |            |       |       |            |    |
|-------------|------------|------------|-------|-------|------------|----|
| mt-Atp8.8   | 1.21E-08   | -0.2853793 | 0.93  | 0.929 | 0.00019983 | 11 |
| Fth1.8      | 1.54E-08   | -0.4243953 | 0.961 | 0.958 | 0.00025305 | 11 |
| Rpl10-ps3.3 | 3.70E-08   | -0.2670747 | 0.934 | 0.892 | 0.00060904 | 11 |
| Atp5e.5     | 5.04E-08   | 0.26048396 | 0.847 | 0.616 | 0.00082907 | 11 |
| Pf4.11      | 7.98E-08   | -0.625459  | 0.14  | 0.311 | 0.00131201 | 11 |
| Ccl4.1      | 9.18E-08   | 0.38373249 | 0.253 | 0.129 | 0.00151031 | 11 |
| C1qb.10     | 1.63E-07   | -0.9023477 | 0.214 | 0.357 | 0.00267444 | 11 |
| Rpl9-ps6.6  | 4.99E-07   | -0.2885128 | 0.939 | 0.905 | 0.00820917 | 11 |
| Nfkb.9      | 7.99E-07   | 0.25877366 | 0.716 | 0.514 | 0.01314798 | 11 |
| Mafb.9      | 1.45E-06   | -1.0744814 | 0.144 | 0.267 | 0.02381684 | 11 |
| Ftl1.9      | 1.01E-05   | -0.4757786 | 0.956 | 0.889 | 0.16536365 | 11 |
| Csf1r.10    | 1.38E-05   | -0.8083061 | 0.236 | 0.336 | 0.22753558 | 11 |
| Gm42418.2   | 3.78E-05   | -0.2763211 | 1     | 1     | 0.62166979 | 11 |
| Ctsb.10     | 6.18E-05   | -0.7774692 | 0.459 | 0.477 | 1          | 11 |
| Sqstm1.4    | 0.00010735 | -0.58912   | 0.323 | 0.383 | 1          | 11 |
| Btg1.6      | 0.00012618 | -0.5261139 | 0.594 | 0.572 | 1          | 11 |
| Pnrc1.5     | 0.00016659 | -0.482151  | 0.507 | 0.517 | 1          | 11 |
| Zfp36l1.8   | 0.00056957 | -0.5470783 | 0.533 | 0.528 | 1          | 11 |
| Fcgrt.9     | 0.000572   | -0.7107971 | 0.183 | 0.259 | 1          | 11 |
| Mrc1.10     | 0.00071584 | -0.7685943 | 0.245 | 0.307 | 1          | 11 |
| Ly6d.9      | 0.00075435 | -0.5670096 | 0.231 | 0.31  | 1          | 11 |
| Ly6e.9      | 0.00085325 | -0.304513  | 0.817 | 0.748 | 1          | 11 |
| Lgmn.10     | 0.00090839 | -0.6205492 | 0.21  | 0.281 | 1          | 11 |
| Ubc.9       | 0.00125176 | -0.5009142 | 0.585 | 0.54  | 1          | 11 |
| Lyz2.10     | 0.00160058 | -0.7361701 | 0.568 | 0.554 | 1          | 11 |
| Marcksl1.9  | 0.00224271 | -0.7716498 | 0.428 | 0.435 | 1          | 11 |
| Cd79a.11    | 0.00263346 | -0.7386329 | 0.183 | 0.253 | 1          | 11 |
| mt-Nd4.5    | 0.00288435 | -0.2764611 | 0.821 | 0.699 | 1          | 11 |
| F13a1.9     | 0.00293872 | -0.7258419 | 0.223 | 0.281 | 1          | 11 |
| Pfdn5       | 0.00355637 | -0.3177674 | 0.694 | 0.602 | 1          | 11 |
| Cd14.10     | 0.00361366 | -0.5804931 | 0.192 | 0.263 | 1          | 11 |
| Neat1.9     | 0.00589983 | -0.4747121 | 0.271 | 0.328 | 1          | 11 |
| Ctss.9      | 0.0062716  | -0.4560151 | 0.528 | 0.5   | 1          | 11 |
| Klf2.9      | 0.00823449 | -0.5132783 | 0.655 | 0.593 | 1          | 11 |
| Arg1        | 0          | 1.93294515 | 0.392 | 0.002 | 0          | 12 |
| Csf2        | 0          | 1.68416321 | 0.301 | 0.002 | 0          | 12 |
| Ii5         | 0          | 1.60183144 | 0.269 | 0     | 0          | 12 |
| Ccr8        | 0          | 1.49390752 | 0.323 | 0.004 | 0          | 12 |
| Ccdc184     | 0          | 1.4089554  | 0.274 | 0.002 | 0          | 12 |
| Lif         | 0          | 1.34403771 | 0.285 | 0.003 | 0          | 12 |
| Gata3       | 2.17E-284  | 1.98796506 | 0.559 | 0.03  | 3.57E-280  | 12 |
| Klrg1       | 1.53E-238  | 1.42836591 | 0.339 | 0.011 | 2.51E-234  | 12 |
| Ptpn13      | 3.76E-224  | 1.35665877 | 0.323 | 0.01  | 6.19E-220  | 12 |

|           |           |            |       |       |            |    |
|-----------|-----------|------------|-------|-------|------------|----|
| Rnf128    | 1.32E-220 | 1.37309038 | 0.306 | 0.009 | 2.18E-216  | 12 |
| Rora.1    | 3.29E-178 | 1.5943136  | 0.478 | 0.037 | 5.40E-174  | 12 |
| Hs3st1    | 1.28E-160 | 1.9098143  | 0.489 | 0.044 | 2.11E-156  | 12 |
| Il2ra     | 1.26E-144 | 1.16690938 | 0.296 | 0.016 | 2.06E-140  | 12 |
| Areg.1    | 2.42E-130 | 2.35480827 | 0.516 | 0.064 | 3.98E-126  | 12 |
| Il1rl1    | 1.11E-122 | 1.36509806 | 0.344 | 0.028 | 1.83E-118  | 12 |
| Lpcat2    | 2.53E-119 | 1.4279511  | 0.371 | 0.033 | 4.17E-115  | 12 |
| Inpp4b    | 1.47E-115 | 1.34258374 | 0.414 | 0.044 | 2.42E-111  | 12 |
| Itk.2     | 2.37E-84  | 1.33345061 | 0.392 | 0.053 | 3.89E-80   | 12 |
| Tnfrsf18  | 3.73E-84  | 1.35703272 | 0.419 | 0.062 | 6.14E-80   | 12 |
| Cd74.9    | 6.90E-74  | -3.42372   | 0.237 | 0.841 | 1.14E-69   | 12 |
| Il7r.2    | 1.50E-73  | 1.13728707 | 0.43  | 0.07  | 2.47E-69   | 12 |
| Lmo4.1    | 2.85E-73  | 1.49472321 | 0.462 | 0.088 | 4.68E-69   | 12 |
| Cish      | 3.13E-73  | 1.16256016 | 0.312 | 0.039 | 5.15E-69   | 12 |
| Hilpda    | 5.04E-72  | 1.57978348 | 0.409 | 0.069 | 8.29E-68   | 12 |
| Rplp1.2   | 2.26E-67  | 0.77520781 | 1     | 0.973 | 3.73E-63   | 12 |
| H2-D1.7   | 2.73E-07  | -0.396945  | 0.882 | 0.89  | 0.00449724 | 14 |
| H2-K1     | 1.70E-34  | -0.3981248 | 0.818 | 0.849 | 2.79E-30   | 0  |
| H2-DMb1   | 9.84E-24  | -0.4210782 | 0.177 | 0.351 | 1.62E-19   | 1  |
| Rpl23.2   | 7.15E-56  | 0.57912852 | 1     | 0.975 | 1.18E-51   | 12 |
| Furin     | 6.49E-53  | 1.20761129 | 0.366 | 0.072 | 1.07E-48   | 12 |
| Ftl1.10   | 8.03E-52  | -1.7596424 | 0.613 | 0.897 | 1.32E-47   | 12 |
| Cxcr6.1   | 6.03E-48  | 0.85585705 | 0.28  | 0.044 | 9.92E-44   | 12 |
| Tmem64.1  | 9.24E-48  | 1.06406792 | 0.349 | 0.07  | 1.52E-43   | 12 |
| Tyrobp.10 | 6.95E-47  | -2.5585155 | 0.038 | 0.622 | 1.14E-42   | 12 |
| Rps7.5    | 9.08E-46  | 0.59702464 | 1     | 0.94  | 1.49E-41   | 12 |
| Rps10.4   | 1.63E-45  | 0.55739844 | 1     | 0.956 | 2.68E-41   | 12 |
| Rpl37a.1  | 2.18E-45  | 0.61824345 | 0.984 | 0.939 | 3.59E-41   | 12 |
| Cst3.9    | 7.77E-44  | -2.7039971 | 0.253 | 0.696 | 1.28E-39   | 12 |
| Rpl13.5   | 6.90E-43  | 0.50163074 | 1     | 0.981 | 1.14E-38   | 12 |
| Icos.1    | 1.16E-42  | 0.92432851 | 0.274 | 0.048 | 1.91E-38   | 12 |
| Fcer1g.9  | 4.42E-41  | -2.2387884 | 0.048 | 0.59  | 7.28E-37   | 12 |
| Ramp1.3   | 6.87E-40  | 1.21579757 | 0.43  | 0.123 | 1.13E-35   | 12 |
| Lyz2.11   | 1.82E-39  | -3.085553  | 0.043 | 0.567 | 2.99E-35   | 12 |
| Uba52.6   | 2.20E-39  | 0.49121145 | 1     | 0.974 | 3.63E-35   | 12 |
| Rps24.6   | 3.36E-39  | 0.48372073 | 0.995 | 0.988 | 5.52E-35   | 12 |
| Ly6a.3    | 3.66E-39  | 1.04713316 | 0.522 | 0.167 | 6.01E-35   | 12 |
| Alox5     | 9.48E-39  | 0.98089403 | 0.28  | 0.055 | 1.56E-34   | 12 |
| Ltb.5     | 1.13E-38  | 1.04960389 | 0.559 | 0.198 | 1.86E-34   | 12 |
| Rps20.6   | 1.27E-38  | 0.51312166 | 1     | 0.972 | 2.09E-34   | 12 |
| Rpl19.6   | 2.25E-38  | 0.49180017 | 1     | 0.954 | 3.70E-34   | 12 |
| Klf2.10   | 3.61E-38  | -1.9458162 | 0.091 | 0.607 | 5.94E-34   | 12 |
| Ltb4r1.2  | 9.12E-38  | 1.09828669 | 0.323 | 0.075 | 1.50E-33   | 12 |

|             |          |            |       |       |          |    |
|-------------|----------|------------|-------|-------|----------|----|
| Gadd45b.9   | 1.33E-37 | 1.24405985 | 0.591 | 0.243 | 2.19E-33 | 12 |
| Ahcyl2      | 1.55E-37 | 1.01289347 | 0.312 | 0.07  | 2.54E-33 | 12 |
| Gpx1.11     | 3.88E-37 | -1.554751  | 0.323 | 0.721 | 6.38E-33 | 12 |
| Emb.3       | 1.06E-36 | 1.00918855 | 0.538 | 0.195 | 1.75E-32 | 12 |
| Nfkb1.1     | 1.08E-36 | 1.18679918 | 0.478 | 0.163 | 1.78E-32 | 12 |
| Skap1.3     | 3.10E-36 | 0.89651777 | 0.371 | 0.094 | 5.10E-32 | 12 |
| Rps2.5      | 4.02E-36 | 0.51390008 | 0.989 | 0.943 | 6.61E-32 | 12 |
| Mdfic       | 4.86E-36 | 0.96675404 | 0.312 | 0.072 | 7.99E-32 | 12 |
| Tnfaip3.7   | 7.73E-36 | 1.08125576 | 0.667 | 0.32  | 1.27E-31 | 12 |
| Ctss.10     | 1.04E-35 | -1.9091249 | 0.022 | 0.513 | 1.71E-31 | 12 |
| Cnot6l      | 2.98E-35 | 1.0150994  | 0.355 | 0.092 | 4.90E-31 | 12 |
| Gimap3.4    | 1.21E-34 | 0.88273466 | 0.484 | 0.155 | 1.98E-30 | 12 |
| Rpl32.5     | 1.86E-34 | 0.5153045  | 0.995 | 0.948 | 3.07E-30 | 12 |
| Rps15a.7    | 2.87E-34 | 0.49749945 | 1     | 0.949 | 4.73E-30 | 12 |
| H2-D1.3     | 1.17E-20 | -0.455574  | 0.915 | 0.889 | 1.93E-16 | 9  |
| Rps3.6      | 6.54E-34 | 0.50114317 | 0.978 | 0.911 | 1.08E-29 | 12 |
| Cd69.1      | 3.85E-33 | 1.0695331  | 0.36  | 0.099 | 6.33E-29 | 12 |
| Rpsa.6      | 4.62E-33 | 0.5018649  | 0.995 | 0.934 | 7.59E-29 | 12 |
| Rgs2.1      | 9.74E-33 | 1.27321022 | 0.516 | 0.203 | 1.60E-28 | 12 |
| Ifitm3.10   | 1.24E-32 | -2.2902652 | 0.038 | 0.502 | 2.05E-28 | 12 |
| Rgcc.1      | 2.53E-32 | 1.05532043 | 0.296 | 0.07  | 4.15E-28 | 12 |
| Psap.9      | 1.05E-31 | -1.4899796 | 0.312 | 0.685 | 1.72E-27 | 12 |
| Rps18.6     | 1.14E-31 | 0.56953844 | 0.973 | 0.868 | 1.87E-27 | 12 |
| Rpl39.7     | 1.25E-31 | 0.56648761 | 0.973 | 0.888 | 2.05E-27 | 12 |
| Cd83.8      | 3.99E-31 | -1.8472537 | 0.032 | 0.481 | 6.57E-27 | 12 |
| Rps8.4      | 2.41E-30 | 0.41352909 | 0.995 | 0.983 | 3.96E-26 | 12 |
| Rps16.4     | 2.53E-30 | 0.4520065  | 1     | 0.973 | 4.16E-26 | 12 |
| Rpl8.6      | 2.98E-30 | 0.48935935 | 0.995 | 0.915 | 4.90E-26 | 12 |
| Rpl10a.5    | 3.70E-30 | 0.50322221 | 0.952 | 0.861 | 6.09E-26 | 12 |
| Rps11.5     | 6.71E-30 | 0.43853105 | 0.989 | 0.966 | 1.10E-25 | 12 |
| Rpl15.3     | 3.02E-29 | 0.53311535 | 0.962 | 0.845 | 4.97E-25 | 12 |
| Rpl27a.5    | 3.47E-29 | 0.51309719 | 0.962 | 0.887 | 5.70E-25 | 12 |
| Marcksl1.10 | 4.04E-29 | -2.2508293 | 0.016 | 0.445 | 6.65E-25 | 12 |
| Apoe.11     | 2.89E-28 | -3.4304214 | 0.07  | 0.48  | 4.76E-24 | 12 |
| Rps3a1.5    | 3.37E-28 | 0.43898379 | 0.995 | 0.963 | 5.54E-24 | 12 |
| Unc93b1.5   | 4.83E-28 | -1.4934311 | 0.048 | 0.473 | 7.94E-24 | 12 |
| Fth1.9      | 8.14E-28 | -0.8773835 | 0.909 | 0.959 | 1.34E-23 | 12 |
| Trbc2.2     | 1.41E-27 | 0.85436252 | 0.28  | 0.07  | 2.32E-23 | 12 |
| Rps5.6      | 2.51E-26 | 0.4167363  | 0.989 | 0.962 | 4.13E-22 | 12 |
| Rpl9-ps6.7  | 5.13E-26 | 0.4527259  | 0.973 | 0.904 | 8.45E-22 | 12 |
| Ccl6.11     | 6.94E-26 | -2.1596789 | 0.027 | 0.422 | 1.14E-21 | 12 |
| Samsn1      | 8.25E-26 | 0.90377377 | 0.312 | 0.092 | 1.36E-21 | 12 |
| Alox5ap.11  | 2.10E-25 | -1.7388794 | 0.016 | 0.407 | 3.45E-21 | 12 |

|             |            |            |       |       |            |    |
|-------------|------------|------------|-------|-------|------------|----|
| H2-DMb1.11  | 0.00233984 | -0.4663819 | 0.21  | 0.33  | 1          | 13 |
| Rpl36a.6    | 3.20E-25   | 0.6141929  | 0.93  | 0.757 | 5.26E-21   | 12 |
| Id2.5       | 3.20E-25   | 0.845876   | 0.5   | 0.208 | 5.27E-21   | 12 |
| Rplp0.6     | 3.49E-25   | 0.45043372 | 0.995 | 0.901 | 5.74E-21   | 12 |
| Rps14.2     | 2.31E-24   | 0.46824855 | 0.968 | 0.929 | 3.81E-20   | 12 |
| Eef1a1.8    | 2.36E-24   | 0.36703975 | 1     | 0.98  | 3.88E-20   | 12 |
| Mt1.11      | 3.91E-24   | -2.2985615 | 0.048 | 0.425 | 6.43E-20   | 12 |
| Itpr2       | 4.57E-24   | 0.86200959 | 0.274 | 0.076 | 7.52E-20   | 12 |
| Ctsb.11     | 5.77E-24   | -1.7830082 | 0.108 | 0.485 | 9.49E-20   | 12 |
| Thy1.3      | 1.09E-23   | 0.59612521 | 0.371 | 0.119 | 1.79E-19   | 12 |
| Ifi27l2a.10 | 1.47E-23   | -1.880348  | 0.038 | 0.411 | 2.42E-19   | 12 |
| Rpl18.5     | 1.48E-23   | 0.42622459 | 0.995 | 0.921 | 2.43E-19   | 12 |
| Ctsc.9      | 1.74E-23   | -1.6661049 | 0.054 | 0.424 | 2.87E-19   | 12 |
| Rps9.2      | 2.71E-23   | 0.40201576 | 0.995 | 0.962 | 4.46E-19   | 12 |
| Rps4x.6     | 4.43E-23   | 0.37390442 | 1     | 0.962 | 7.29E-19   | 12 |
| Rps19.6     | 6.58E-23   | 0.41917302 | 0.995 | 0.932 | 1.08E-18   | 12 |
| Rps21.4     | 6.73E-23   | 0.48090385 | 0.962 | 0.881 | 1.11E-18   | 12 |
| Rpl30.4     | 7.48E-23   | 0.41840745 | 0.989 | 0.952 | 1.23E-18   | 12 |
| Ccr2.6      | 7.69E-23   | 0.82266862 | 0.468 | 0.195 | 1.27E-18   | 12 |
| Gm10076.3   | 7.87E-23   | 0.40827346 | 0.995 | 0.952 | 1.29E-18   | 12 |
| Ifitm2.10   | 1.10E-22   | -1.5558372 | 0.032 | 0.399 | 1.81E-18   | 12 |
| Mcl1.9      | 6.40E-22   | -1.3381727 | 0.075 | 0.436 | 1.05E-17   | 12 |
| Ctsh.8      | 1.07E-21   | -1.3183662 | 0.038 | 0.394 | 1.76E-17   | 12 |
| Grn.8       | 1.24E-21   | -1.5773624 | 0.032 | 0.385 | 2.04E-17   | 12 |
| Rplp2.4     | 2.34E-21   | 0.42136586 | 0.952 | 0.918 | 3.85E-17   | 12 |
| C1qb.11     | 3.05E-21   | -2.8291504 | 0.022 | 0.36  | 5.01E-17   | 12 |
| Pltp.11     | 3.78E-21   | -1.887832  | 0.005 | 0.345 | 6.21E-17   | 12 |
| Wfdc17.9    | 4.16E-21   | -1.8547571 | 0     | 0.338 | 6.85E-17   | 12 |
| Tpt1.1      | 5.88E-21   | 0.34685815 | 0.989 | 0.982 | 9.67E-17   | 12 |
| Rpl12.8     | 6.26E-21   | 0.5358297  | 0.892 | 0.758 | 1.03E-16   | 12 |
| Cd82.2      | 1.44E-20   | 0.81065506 | 0.36  | 0.135 | 2.37E-16   | 12 |
| Plek.6      | 1.66E-20   | -1.2661935 | 0.016 | 0.355 | 2.72E-16   | 12 |
| Zfp36.7     | 1.93E-20   | -1.2286565 | 0.323 | 0.618 | 3.18E-16   | 12 |
| Rpl36.6     | 2.99E-20   | 0.41000222 | 0.968 | 0.898 | 4.92E-16   | 12 |
| Ly86.6      | 3.47E-20   | -1.3327703 | 0     | 0.326 | 5.71E-16   | 12 |
| Marcks.9    | 3.52E-20   | -1.4569256 | 0.011 | 0.34  | 5.80E-16   | 12 |
| C1qc.11     | 3.86E-20   | -2.7485999 | 0.016 | 0.342 | 6.34E-16   | 12 |
| Rps6.6      | 5.95E-20   | 0.5120807  | 0.914 | 0.768 | 9.79E-16   | 12 |
| Rpl35.4     | 6.66E-20   | 0.40598308 | 0.978 | 0.923 | 1.10E-15   | 12 |
| Rpl29.5     | 7.28E-20   | 0.39008539 | 0.968 | 0.854 | 1.20E-15   | 12 |
| H2-D1.10    | 2.50E-06   | -0.5328944 | 0.944 | 0.89  | 0.04115323 | 17 |
| Nrip1       | 1.27E-19   | 0.86290993 | 0.301 | 0.105 | 2.09E-15   | 12 |
| Selenop.11  | 1.36E-19   | -2.3469007 | 0.108 | 0.423 | 2.24E-15   | 12 |

|            |          |            |       |       |          |    |
|------------|----------|------------|-------|-------|----------|----|
| C1qa.11    | 2.31E-19 | -2.5787695 | 0.022 | 0.337 | 3.79E-15 | 12 |
| Prdx6.2    | 2.87E-19 | 0.93053094 | 0.403 | 0.178 | 4.72E-15 | 12 |
| Rpl18a.6   | 2.96E-19 | 0.34067406 | 1     | 0.961 | 4.87E-15 | 12 |
| Csf1r.11   | 3.18E-19 | -1.7199122 | 0.022 | 0.34  | 5.23E-15 | 12 |
| Pld4.7     | 4.21E-19 | -1.2780111 | 0.016 | 0.333 | 6.92E-15 | 12 |
| Mrc1.11    | 1.04E-18 | -1.7977571 | 0.005 | 0.313 | 1.70E-14 | 12 |
| Rps27a.4   | 1.16E-18 | 0.36156349 | 0.968 | 0.936 | 1.91E-14 | 12 |
| Rpl14.8    | 1.29E-18 | 0.43692382 | 0.914 | 0.784 | 2.12E-14 | 12 |
| Cfp.10     | 1.40E-18 | -1.459526  | 0.011 | 0.319 | 2.31E-14 | 12 |
| Pf4.12     | 2.74E-18 | -2.5168576 | 0.011 | 0.313 | 4.51E-14 | 12 |
| Rpl11.5    | 4.22E-18 | 0.34776546 | 0.978 | 0.925 | 6.93E-14 | 12 |
| Cybb.8     | 4.38E-18 | -1.2857053 | 0.027 | 0.336 | 7.21E-14 | 12 |
| Rpl27.5    | 5.12E-18 | 0.45196096 | 0.925 | 0.827 | 8.43E-14 | 12 |
| Rpl22.4    | 6.25E-18 | 0.41803818 | 0.941 | 0.825 | 1.03E-13 | 12 |
| Rpl7.4     | 9.34E-18 | 0.39393275 | 0.946 | 0.839 | 1.54E-13 | 12 |
| Itgb7.4    | 1.22E-17 | 0.81223048 | 0.409 | 0.182 | 2.01E-13 | 12 |
| Ccl2.11    | 2.39E-17 | -2.2808215 | 0     | 0.288 | 3.93E-13 | 12 |
| Spi1.9     | 4.86E-17 | -1.1975502 | 0.022 | 0.312 | 7.99E-13 | 12 |
| Crip1.10   | 7.59E-17 | -0.9293451 | 0.516 | 0.725 | 1.25E-12 | 12 |
| Tspan13.2  | 7.64E-17 | 0.80230305 | 0.371 | 0.16  | 1.26E-12 | 12 |
| F13a1.10   | 9.25E-17 | -1.775126  | 0.005 | 0.286 | 1.52E-12 | 12 |
| Cd68.8     | 1.06E-16 | -1.2950969 | 0     | 0.279 | 1.74E-12 | 12 |
| Lgals3.11  | 1.18E-16 | -1.3487793 | 0.065 | 0.357 | 1.94E-12 | 12 |
| B2m.7      | 1.78E-16 | 0.41669579 | 0.909 | 0.805 | 2.93E-12 | 12 |
| Ier3.8     | 2.51E-16 | -1.4996909 | 0.043 | 0.332 | 4.13E-12 | 12 |
| Rpl38.1    | 2.98E-16 | 0.43938471 | 0.914 | 0.791 | 4.91E-12 | 12 |
| Lgmn.11    | 3.50E-16 | -1.4357957 | 0.011 | 0.286 | 5.76E-12 | 12 |
| Fcgr2b.7   | 3.54E-16 | -1.2242626 | 0.011 | 0.285 | 5.82E-12 | 12 |
| Ptprcap.11 | 4.56E-16 | 0.58609074 | 0.522 | 0.259 | 7.49E-12 | 12 |
| Il2rg.9    | 4.89E-16 | 0.67810563 | 0.516 | 0.279 | 8.04E-12 | 12 |
| Rpl5.5     | 6.40E-16 | 0.49018999 | 0.839 | 0.714 | 1.05E-11 | 12 |
| Zeb2.10    | 6.46E-16 | -1.2336496 | 0.027 | 0.302 | 1.06E-11 | 12 |
| Rpl34.4    | 7.75E-16 | 0.30738518 | 0.989 | 0.945 | 1.28E-11 | 12 |
| Dnaja1.3   | 1.02E-15 | 0.9943778  | 0.457 | 0.251 | 1.68E-11 | 12 |
| App.7      | 1.08E-15 | -1.2052734 | 0.011 | 0.28  | 1.78E-11 | 12 |
| Mafb.10    | 1.19E-15 | -1.8027014 | 0.005 | 0.27  | 1.96E-11 | 12 |
| Rpl21.5    | 1.25E-15 | 0.46391108 | 0.855 | 0.673 | 2.05E-11 | 12 |
| Actb.6     | 1.25E-15 | -0.3536203 | 0.957 | 0.994 | 2.05E-11 | 12 |
| Fcgrt.10   | 1.31E-15 | -1.4100902 | 0     | 0.263 | 2.15E-11 | 12 |
| Rps26.7    | 1.37E-15 | 0.33613528 | 0.962 | 0.934 | 2.25E-11 | 12 |
| Atf3.8     | 1.73E-15 | -1.091294  | 0.22  | 0.514 | 2.84E-11 | 12 |
| Rack1.4    | 1.86E-15 | 0.46714383 | 0.892 | 0.766 | 3.06E-11 | 12 |
| Rps27.8    | 2.47E-15 | 0.3475751  | 0.968 | 0.9   | 4.07E-11 | 12 |

|             |          |            |       |       |          |    |
|-------------|----------|------------|-------|-------|----------|----|
| Ldha.6      | 3.90E-15 | 0.79102966 | 0.538 | 0.334 | 6.42E-11 | 12 |
| Cd14.11     | 6.39E-15 | -1.5247507 | 0.011 | 0.267 | 1.05E-10 | 12 |
| Socs3.10    | 7.43E-15 | -1.1885324 | 0.022 | 0.285 | 1.22E-10 | 12 |
| Rpl3.6      | 9.79E-15 | 0.38743207 | 0.93  | 0.835 | 1.61E-10 | 12 |
| H2-DMb2.3   | 5.25E-09 | -0.5484342 | 0.158 | 0.251 | 8.63E-05 | 4  |
| Npc2.8      | 1.11E-14 | -0.8116331 | 0.231 | 0.519 | 1.82E-10 | 12 |
| Ppp1cc.3    | 1.53E-14 | 0.71906984 | 0.409 | 0.204 | 2.51E-10 | 12 |
| Rassf4.8    | 2.71E-14 | -1.0638187 | 0.005 | 0.252 | 4.46E-10 | 12 |
| Clec10a.10  | 2.80E-14 | -1.4336011 | 0.005 | 0.251 | 4.61E-10 | 12 |
| Mgl2.11     | 2.93E-14 | -1.3762331 | 0.005 | 0.252 | 4.82E-10 | 12 |
| Hcst.3      | 3.53E-14 | 0.57227162 | 0.403 | 0.19  | 5.80E-10 | 12 |
| Selenot     | 3.94E-14 | 0.6989253  | 0.323 | 0.14  | 6.48E-10 | 12 |
| 4930523C07R | 4.13E-14 | 0.71210494 | 0.323 | 0.14  | 6.79E-10 | 12 |
| Rps12.3     | 6.16E-14 | 0.30499259 | 0.973 | 0.937 | 1.01E-09 | 12 |
| Fkbp3       | 3.20E-13 | 0.68299922 | 0.269 | 0.109 | 5.27E-09 | 12 |
| Rpl24.3     | 3.28E-13 | 0.38698681 | 0.93  | 0.849 | 5.40E-09 | 12 |
| Ppia.5      | 4.25E-13 | 0.34226901 | 0.925 | 0.888 | 6.99E-09 | 12 |
| Napsa.10    | 5.35E-13 | -1.110275  | 0.032 | 0.27  | 8.81E-09 | 12 |
| Cd79a.12    | 8.09E-13 | -1.8931739 | 0.027 | 0.257 | 1.33E-08 | 12 |
| Nfkb.10     | 1.12E-12 | 0.61026072 | 0.71  | 0.516 | 1.85E-08 | 12 |
| Rps23.2     | 1.31E-12 | 0.35149159 | 0.93  | 0.895 | 2.15E-08 | 12 |
| Clta.8      | 1.82E-12 | -0.6985607 | 0.285 | 0.555 | 2.99E-08 | 12 |
| Atp6v0b.8   | 1.93E-12 | -0.7985016 | 0.102 | 0.366 | 3.18E-08 | 12 |
| Rpl26.4     | 2.00E-12 | 0.31527909 | 0.946 | 0.897 | 3.29E-08 | 12 |
| Rpl28.5     | 3.24E-12 | 0.29974214 | 0.946 | 0.913 | 5.33E-08 | 12 |
| Rpl22l1.5   | 3.40E-12 | 0.59181353 | 0.613 | 0.438 | 5.59E-08 | 12 |
| Sat1.9      | 3.72E-12 | -0.9251442 | 0.097 | 0.345 | 6.12E-08 | 12 |
| S100a4.5    | 4.80E-12 | 0.6129823  | 0.36  | 0.177 | 7.89E-08 | 12 |
| Rpl6.5      | 4.88E-12 | 0.32045435 | 0.952 | 0.896 | 8.03E-08 | 12 |
| Atp6v0c.9   | 6.82E-12 | -0.8132537 | 0.172 | 0.43  | 1.12E-07 | 12 |
| Iqgap1.3    | 7.60E-12 | -0.7247197 | 0.188 | 0.447 | 1.25E-07 | 12 |
| Eef1b2.4    | 9.47E-12 | 0.44092146 | 0.812 | 0.666 | 1.56E-07 | 12 |
| H3f3a.8     | 1.15E-11 | -0.5652538 | 0.532 | 0.743 | 1.89E-07 | 12 |
| Vps37b.8    | 1.18E-11 | 0.64736978 | 0.441 | 0.239 | 1.93E-07 | 12 |
| Srgn.4      | 1.18E-11 | 0.50880614 | 0.806 | 0.669 | 1.94E-07 | 12 |
| Rel.8       | 2.87E-11 | -0.8712784 | 0.059 | 0.286 | 4.72E-07 | 12 |
| Litaf.4     | 4.90E-11 | -0.7864161 | 0.048 | 0.269 | 8.07E-07 | 12 |
| Anxa2.11    | 5.61E-11 | -0.9125541 | 0.059 | 0.28  | 9.22E-07 | 12 |
| Pde4b.7     | 6.11E-11 | -0.6363725 | 0.177 | 0.423 | 1.00E-06 | 12 |
| Arpc1b.8    | 8.66E-11 | -0.5466193 | 0.398 | 0.628 | 1.42E-06 | 12 |
| Rpl37.3     | 9.17E-11 | 0.26574465 | 0.957 | 0.928 | 1.51E-06 | 12 |
| Nr4a1.6     | 9.88E-11 | 0.68963572 | 0.634 | 0.502 | 1.63E-06 | 12 |
| Ccnd2.4     | 1.28E-10 | 0.5642404  | 0.376 | 0.2   | 2.10E-06 | 12 |



|             |          |            |       |       |            |    |
|-------------|----------|------------|-------|-------|------------|----|
| Nfkbid.5    | 1.58E-10 | 0.58534017 | 0.425 | 0.239 | 2.60E-06   | 12 |
| Efhd2.9     | 1.64E-10 | -0.7845802 | 0.081 | 0.301 | 2.70E-06   | 12 |
| Egr1.9      | 1.80E-10 | -1.2332898 | 0.263 | 0.462 | 2.96E-06   | 12 |
| Rpl9.2      | 2.05E-10 | 0.41359134 | 0.769 | 0.626 | 3.37E-06   | 12 |
| Slc25a3     | 2.13E-10 | 0.44625074 | 0.645 | 0.49  | 3.50E-06   | 12 |
| Hexa.8      | 2.21E-10 | -0.8774283 | 0.081 | 0.297 | 3.64E-06   | 12 |
| Rpl13a.9    | 2.45E-10 | 0.27935921 | 0.93  | 0.81  | 4.02E-06   | 12 |
| Ptpn18.4    | 2.48E-10 | 0.41414227 | 0.758 | 0.61  | 4.08E-06   | 12 |
| Fosb.8      | 2.52E-10 | 0.4694538  | 0.699 | 0.497 | 4.15E-06   | 12 |
| Nfkbiz.9    | 2.71E-10 | 0.37551438 | 0.667 | 0.435 | 4.46E-06   | 12 |
| Ighm.9      | 3.63E-10 | -1.4383656 | 0.194 | 0.42  | 5.97E-06   | 12 |
| S100a10.10  | 4.65E-10 | 0.51019031 | 0.629 | 0.456 | 7.65E-06   | 12 |
| Aff4        | 5.20E-10 | 0.55475282 | 0.28  | 0.131 | 8.56E-06   | 12 |
| Tagln2.8    | 5.29E-10 | 0.5190295  | 0.651 | 0.486 | 8.70E-06   | 12 |
| Shisa5.9    | 5.84E-10 | 0.43083012 | 0.624 | 0.447 | 9.61E-06   | 12 |
| Zfp36l1.9   | 6.04E-10 | 0.60354564 | 0.656 | 0.525 | 9.93E-06   | 12 |
| Ctsa.9      | 6.81E-10 | -0.7830233 | 0.081 | 0.289 | 1.12E-05   | 12 |
| Kctd12.9    | 6.99E-10 | -0.7356879 | 0.151 | 0.376 | 1.15E-05   | 12 |
| Sptssa.1    | 7.92E-10 | 0.67050898 | 0.323 | 0.172 | 1.30E-05   | 12 |
| Ubc.10      | 9.31E-10 | -0.6592628 | 0.317 | 0.546 | 1.53E-05   | 12 |
| Dusp5.6     | 1.21E-09 | 0.60892507 | 0.392 | 0.226 | 1.98E-05   | 12 |
| Ctsz.7      | 1.32E-09 | -0.6766339 | 0.134 | 0.358 | 2.18E-05   | 12 |
| Ptpn6.7     | 1.39E-09 | -0.7689824 | 0.065 | 0.263 | 2.28E-05   | 12 |
| Ier5.8      | 1.73E-09 | -0.6376954 | 0.151 | 0.376 | 2.85E-05   | 12 |
| Rps13.5     | 1.90E-09 | 0.2803767  | 0.941 | 0.829 | 3.12E-05   | 12 |
| Bri3.9      | 3.03E-09 | -0.6487127 | 0.151 | 0.377 | 4.98E-05   | 12 |
| Ets1.4      | 3.26E-09 | 0.45329181 | 0.349 | 0.18  | 5.36E-05   | 12 |
| Plec.2      | 3.80E-09 | 0.63127262 | 0.312 | 0.166 | 6.26E-05   | 12 |
| Cltc.9      | 6.99E-09 | -0.7424521 | 0.134 | 0.336 | 0.00011492 | 12 |
| Rps28.3     | 7.47E-09 | 0.33929428 | 0.892 | 0.796 | 0.00012281 | 12 |
| Neur13.1    | 9.22E-09 | 0.65505369 | 0.323 | 0.178 | 0.00015169 | 12 |
| Neat1.10    | 1.01E-08 | -0.7980747 | 0.129 | 0.331 | 0.000166   | 12 |
| Ptms.8      | 1.12E-08 | -0.6367443 | 0.091 | 0.293 | 0.00018468 | 12 |
| Tmem176b.8  | 1.16E-08 | 0.32465645 | 0.656 | 0.434 | 0.00019003 | 12 |
| Naca.5      | 1.31E-08 | 0.36680998 | 0.769 | 0.655 | 0.00021584 | 12 |
| Clic4.9     | 1.32E-08 | -0.7191847 | 0.07  | 0.256 | 0.00021661 | 12 |
| H2-K1.2     | 6.93E-02 | -0.5495101 | 0.676 | 0.859 | 1.14E-37   | 3  |
| Gabarapl2.2 | 1.41E-08 | 0.544324   | 0.366 | 0.212 | 0.00023255 | 12 |
| Man2b1.8    | 1.42E-08 | -0.6761157 | 0.108 | 0.304 | 0.00023311 | 12 |
| Dusp1.7     | 1.59E-08 | -0.7512764 | 0.473 | 0.609 | 0.00026234 | 12 |
| Ly6d.10     | 1.66E-08 | -1.1068424 | 0.129 | 0.312 | 0.00027252 | 12 |
| Hsp90b1.3   | 1.74E-08 | -0.5447309 | 0.247 | 0.48  | 0.00028574 | 12 |
| Ehd4.9      | 1.88E-08 | -0.748723  | 0.086 | 0.271 | 0.00030986 | 12 |

|            |          |            |       |       |            |    |
|------------|----------|------------|-------|-------|------------|----|
| Gdi2.5     | 1.92E-08 | -0.6404869 | 0.177 | 0.38  | 0.0003159  | 12 |
| Rpl7a.2    | 2.49E-08 | 0.35932106 | 0.839 | 0.761 | 0.00040908 | 12 |
| Esyt1.1    | 2.66E-08 | 0.54410654 | 0.285 | 0.149 | 0.00043781 | 12 |
| Nr3c1      | 2.87E-08 | 0.54677767 | 0.306 | 0.165 | 0.00047159 | 12 |
| Laptm4a.7  | 2.90E-08 | -0.6618751 | 0.091 | 0.277 | 0.00047682 | 12 |
| Foxp1.7    | 3.23E-08 | -0.6829587 | 0.086 | 0.27  | 0.00053163 | 12 |
| Saraf.2    | 4.58E-08 | 0.50297685 | 0.312 | 0.171 | 0.00075327 | 12 |
| Gabarap.5  | 4.75E-08 | -0.4660005 | 0.355 | 0.57  | 0.00078186 | 12 |
| Tmem176a.8 | 6.16E-08 | 0.43419327 | 0.5   | 0.33  | 0.00101307 | 12 |
| Prdx1.5    | 6.36E-08 | -0.6074303 | 0.188 | 0.384 | 0.00104539 | 12 |
| Rexo2.1    | 6.76E-08 | 0.57044714 | 0.301 | 0.169 | 0.00111158 | 12 |
| Atox1.11   | 8.16E-08 | -0.5916712 | 0.263 | 0.461 | 0.00134202 | 12 |
| Odc1.2     | 9.84E-08 | 0.63626716 | 0.323 | 0.187 | 0.00161891 | 12 |
| Xist.5     | 1.01E-07 | 0.50150794 | 0.591 | 0.472 | 0.00166078 | 12 |
| mt-Nd1.2   | 1.24E-07 | 0.26881088 | 0.909 | 0.867 | 0.00204445 | 12 |
| Pim1.6     | 1.30E-07 | 0.48462147 | 0.575 | 0.446 | 0.0021446  | 12 |
| Rgs10.8    | 1.31E-07 | -0.6193298 | 0.102 | 0.28  | 0.00216094 | 12 |
| Ier2.9     | 1.33E-07 | -0.4615204 | 0.339 | 0.561 | 0.00219538 | 12 |
| Lmna.3     | 1.58E-07 | 0.54346342 | 0.349 | 0.208 | 0.00260486 | 12 |
| Nrros.10   | 1.60E-07 | -0.642158  | 0.113 | 0.288 | 0.00263145 | 12 |
| Brd2       | 2.13E-07 | -0.6278203 | 0.091 | 0.26  | 0.00350593 | 12 |
| Erp29.7    | 2.19E-07 | -0.5632855 | 0.188 | 0.371 | 0.00359964 | 12 |
| Eif4a1.2   | 2.48E-07 | -0.4825538 | 0.14  | 0.327 | 0.00408524 | 12 |
| Fos.7      | 3.15E-07 | -0.8435176 | 0.511 | 0.623 | 0.00518616 | 12 |
| Calm1.3    | 4.31E-07 | -0.3839905 | 0.543 | 0.721 | 0.00708475 | 12 |
| Lcp1.3     | 4.42E-07 | -0.4562826 | 0.339 | 0.539 | 0.00726613 | 12 |
| Pole4      | 4.75E-07 | 0.541179   | 0.285 | 0.16  | 0.0078176  | 12 |
| Fosl2.4    | 4.97E-07 | 0.5914581  | 0.339 | 0.212 | 0.00817877 | 12 |
| Hspa5.1    | 5.51E-07 | -0.401739  | 0.269 | 0.468 | 0.00907047 | 12 |
| H2afz.11   | 5.86E-07 | -0.5737277 | 0.425 | 0.592 | 0.00963319 | 12 |
| Gnai2.7    | 6.67E-07 | -0.4579084 | 0.349 | 0.532 | 0.01097362 | 12 |
| Fam107b.2  | 7.45E-07 | 0.50895787 | 0.306 | 0.178 | 0.01225949 | 12 |
| Tuba1b.5   | 8.74E-07 | -0.6048713 | 0.151 | 0.324 | 0.01437858 | 12 |
| Anxa5.7    | 9.16E-07 | -0.4780514 | 0.167 | 0.347 | 0.01506087 | 12 |
| Btg1.7     | 9.76E-07 | 0.34035626 | 0.688 | 0.57  | 0.01606221 | 12 |
| Uqcrh.1    | 1.01E-06 | 0.36688388 | 0.672 | 0.559 | 0.01664334 | 12 |
| Snx5.10    | 1.03E-06 | -0.5648294 | 0.151 | 0.321 | 0.01700469 | 12 |
| Npm1.5     | 1.09E-06 | 0.36546277 | 0.64  | 0.528 | 0.01788178 | 12 |
| Jun.11     | 1.23E-06 | -1.0583909 | 0.323 | 0.466 | 0.02020677 | 12 |
| Ncor1.1    | 1.39E-06 | 0.5134526  | 0.317 | 0.195 | 0.02285874 | 12 |
| Fkbp1a.4   | 1.45E-06 | -0.5225458 | 0.097 | 0.256 | 0.02387538 | 12 |
| Snx3.5     | 1.58E-06 | -0.4052819 | 0.167 | 0.355 | 0.02606185 | 12 |
| Myh9.5     | 2.12E-06 | -0.4766586 | 0.328 | 0.506 | 0.03487889 | 12 |

|            |          |            |       |       |            |    |
|------------|----------|------------|-------|-------|------------|----|
| Ythdc1     | 2.17E-06 | 0.55791074 | 0.301 | 0.184 | 0.03562362 | 12 |
| Lsp1.10    | 2.51E-06 | -0.674041  | 0.253 | 0.4   | 0.04131305 | 12 |
| Fam49b.4   | 2.53E-06 | -0.5181783 | 0.14  | 0.304 | 0.04158376 | 12 |
| Arpc2.7    | 2.83E-06 | -0.3648465 | 0.532 | 0.67  | 0.04655309 | 12 |
| Sh3bgrl3.6 | 3.27E-06 | 0.29252286 | 0.823 | 0.746 | 0.05384857 | 12 |
| Rps15.2    | 5.60E-06 | 0.31518714 | 0.726 | 0.673 | 0.09219201 | 12 |
| Sept1.4    | 5.99E-06 | 0.41059738 | 0.285 | 0.165 | 0.09860096 | 12 |
| Aes.1      | 7.10E-06 | 0.57107908 | 0.323 | 0.212 | 0.11670869 | 12 |
| Rhoa.1     | 8.04E-06 | -0.3654193 | 0.323 | 0.508 | 0.13232559 | 12 |
| Lars2.1    | 8.18E-06 | 0.36140047 | 0.817 | 0.709 | 0.13449436 | 12 |
| Ccnl1.8    | 8.61E-06 | -0.4958562 | 0.151 | 0.31  | 0.14154563 | 12 |
| Akr1a1.7   | 1.22E-05 | -0.3811572 | 0.188 | 0.356 | 0.20010682 | 12 |
| Fxyd5.11   | 1.40E-05 | 0.33257872 | 0.591 | 0.462 | 0.23042096 | 12 |
| Rpl17.5    | 1.63E-05 | 0.35978222 | 0.645 | 0.57  | 0.26866506 | 12 |
| Canx.4     | 1.78E-05 | -0.5061661 | 0.145 | 0.29  | 0.29249722 | 12 |
| Cox6c.3    | 1.80E-05 | 0.38476435 | 0.527 | 0.445 | 0.29680492 | 12 |
| lfrd1.3    | 1.96E-05 | 0.42842589 | 0.355 | 0.237 | 0.32245562 | 12 |
| S100a6.10  | 2.18E-05 | 0.29868449 | 0.817 | 0.751 | 0.3582499  | 12 |
| Wnk1.4     | 2.42E-05 | -0.4739189 | 0.124 | 0.263 | 0.39869093 | 12 |
| Rpl4.6     | 2.55E-05 | 0.28315265 | 0.726 | 0.642 | 0.42021209 | 12 |
| Gstm1.10   | 2.88E-05 | -0.3209777 | 0.511 | 0.649 | 0.47393724 | 12 |
| Gng5.6     | 2.94E-05 | -0.3390543 | 0.435 | 0.601 | 0.48281837 | 12 |
| Eif3f.6    | 3.04E-05 | 0.28190789 | 0.699 | 0.616 | 0.50036341 | 12 |
| Atpif1.11  | 3.21E-05 | -0.3160375 | 0.156 | 0.319 | 0.52772921 | 12 |
| Ucp2.6     | 3.34E-05 | -0.3518038 | 0.446 | 0.602 | 0.54953905 | 12 |
| Rrbp1.8    | 3.37E-05 | -0.3780857 | 0.194 | 0.352 | 0.55360293 | 12 |
| Sept9.4    | 3.43E-05 | 0.45456564 | 0.258 | 0.156 | 0.56470185 | 12 |
| Pebp1.1    | 3.76E-05 | 0.41782875 | 0.323 | 0.214 | 0.6179333  | 12 |
| Syng2.8    | 3.88E-05 | -0.4960935 | 0.118 | 0.251 | 0.63758841 | 12 |
| Rap1a.3    | 4.49E-05 | -0.3655502 | 0.134 | 0.278 | 0.73788651 | 12 |
| Rtn4.6     | 5.74E-05 | -0.4286227 | 0.118 | 0.254 | 0.94388445 | 12 |
| Selplg.7   | 5.90E-05 | 0.37391211 | 0.409 | 0.303 | 0.96983885 | 12 |
| Dbi.7      | 7.23E-05 | -0.3912138 | 0.156 | 0.295 | 1          | 12 |
| Btf3.3     | 7.60E-05 | 0.30192325 | 0.667 | 0.611 | 1          | 12 |
| Mrfap1.1   | 7.67E-05 | -0.3588396 | 0.134 | 0.276 | 1          | 12 |
| Lamp1.10   | 7.81E-05 | -0.4817383 | 0.28  | 0.417 | 1          | 12 |
| Rps27l.7   | 8.32E-05 | -0.4519734 | 0.177 | 0.311 | 1          | 12 |
| Gpx4.1     | 8.47E-05 | 0.38483063 | 0.527 | 0.441 | 1          | 12 |
| Calr.1     | 8.48E-05 | -0.3512759 | 0.188 | 0.34  | 1          | 12 |
| Aldoa.5    | 9.17E-05 | 0.39365932 | 0.462 | 0.364 | 1          | 12 |
| Bhlhe40.3  | 9.30E-05 | 0.4985482  | 0.28  | 0.181 | 1          | 12 |
| Rac2.10    | 9.36E-05 | 0.29853968 | 0.586 | 0.479 | 1          | 12 |
| Cd52.8     | 9.95E-05 | -0.325552  | 0.699 | 0.735 | 1          | 12 |

|            |            |            |       |       |   |    |
|------------|------------|------------|-------|-------|---|----|
| Sh3glb1.2  | 0.00013742 | -0.3260389 | 0.21  | 0.355 | 1 | 12 |
| Sub1.6     | 0.00014608 | 0.33110885 | 0.565 | 0.461 | 1 | 12 |
| Klf4.8     | 0.00017945 | -0.6484229 | 0.247 | 0.378 | 1 | 12 |
| Rpl23a.2   | 0.00018051 | 0.33396845 | 0.661 | 0.636 | 1 | 12 |
| Gpr132.4   | 0.00019165 | 0.43614044 | 0.317 | 0.222 | 1 | 12 |
| Ctsd.10    | 0.00021723 | -0.5468741 | 0.172 | 0.293 | 1 | 12 |
| Rap1b.6    | 0.00025412 | -0.3324862 | 0.269 | 0.418 | 1 | 12 |
| Gstp1.5    | 0.00027561 | 0.3050242  | 0.403 | 0.295 | 1 | 12 |
| Scand1.2   | 0.00033696 | -0.2725193 | 0.199 | 0.34  | 1 | 12 |
| Usmg5.2    | 0.00037519 | 0.37053851 | 0.366 | 0.272 | 1 | 12 |
| Atp6v0e    | 0.00043228 | -0.2556038 | 0.247 | 0.392 | 1 | 12 |
| Rabac1.1   | 0.00045756 | 0.38018101 | 0.392 | 0.303 | 1 | 12 |
| Spcs2.1    | 0.00046387 | 0.46125144 | 0.28  | 0.2   | 1 | 12 |
| Capza2.5   | 0.00051024 | -0.3505575 | 0.145 | 0.261 | 1 | 12 |
| Gltf.7     | 0.00054454 | -0.3099031 | 0.14  | 0.261 | 1 | 12 |
| Elf1.1     | 0.00057519 | 0.38392774 | 0.301 | 0.21  | 1 | 12 |
| Cebpb.11   | 0.00067536 | -0.5075107 | 0.22  | 0.332 | 1 | 12 |
| Atp5g2.1   | 0.00071843 | 0.2924355  | 0.57  | 0.505 | 1 | 12 |
| Eif5.1     | 0.00074597 | -0.2722199 | 0.161 | 0.283 | 1 | 12 |
| Jpt1.2     | 0.00077082 | -0.3033939 | 0.194 | 0.324 | 1 | 12 |
| Rapgef6    | 0.0007757  | 0.41824497 | 0.263 | 0.178 | 1 | 12 |
| Txn1.5     | 0.00084484 | 0.26188102 | 0.339 | 0.249 | 1 | 12 |
| Ptbp3      | 0.00093022 | -0.2723188 | 0.151 | 0.266 | 1 | 12 |
| Pomp.4     | 0.00100782 | -0.3198379 | 0.204 | 0.325 | 1 | 12 |
| Vps28.3    | 0.00104287 | 0.38599126 | 0.274 | 0.194 | 1 | 12 |
| Flna.8     | 0.00112657 | -0.4020746 | 0.188 | 0.301 | 1 | 12 |
| Cyba.4     | 0.0012072  | -0.2549768 | 0.656 | 0.719 | 1 | 12 |
| Ostf1.3    | 0.00133367 | -0.3428235 | 0.204 | 0.317 | 1 | 12 |
| Klf6.10    | 0.00135663 | -0.4422237 | 0.414 | 0.533 | 1 | 12 |
| Gm8186.2   | 0.00147158 | 0.3611207  | 0.333 | 0.256 | 1 | 12 |
| Mrpl33.3   | 0.00149804 | 0.36833152 | 0.296 | 0.217 | 1 | 12 |
| Snrpf.3    | 0.00154999 | 0.30670895 | 0.333 | 0.248 | 1 | 12 |
| Csnk2b.1   | 0.00158439 | 0.38933056 | 0.263 | 0.187 | 1 | 12 |
| Eif3h.3    | 0.00159561 | 0.33903556 | 0.478 | 0.408 | 1 | 12 |
| Vamp8.7    | 0.00175085 | -0.2761094 | 0.22  | 0.345 | 1 | 12 |
| Uqcrb      | 0.0018116  | -0.3078499 | 0.177 | 0.283 | 1 | 12 |
| Sdcbp.6    | 0.00190932 | -0.3524944 | 0.172 | 0.277 | 1 | 12 |
| Dazap2.1   | 0.00195619 | -0.3323863 | 0.21  | 0.323 | 1 | 12 |
| Elob.2     | 0.00207325 | 0.30655749 | 0.5   | 0.435 | 1 | 12 |
| Zfand5.7   | 0.00262292 | -0.2559859 | 0.156 | 0.264 | 1 | 12 |
| Atp6v1g1.2 | 0.00266465 | -0.2578407 | 0.183 | 0.295 | 1 | 12 |
| Tbca.2     | 0.00287351 | 0.35154172 | 0.355 | 0.278 | 1 | 12 |
| Serp1.6    | 0.00291544 | 0.35692523 | 0.441 | 0.374 | 1 | 12 |

|              |            |            |       |       |           |    |
|--------------|------------|------------|-------|-------|-----------|----|
| 2010107E04Ri | 0.00296719 | 0.38219446 | 0.366 | 0.301 | 1         | 12 |
| Dynll1.1     | 0.00309573 | -0.2775643 | 0.204 | 0.311 | 1         | 12 |
| Rpl31.1      | 0.00322082 | 0.27274062 | 0.543 | 0.496 | 1         | 12 |
| Mif.6        | 0.00324048 | 0.26446224 | 0.323 | 0.246 | 1         | 12 |
| Sec11c.2     | 0.00418211 | 0.29651034 | 0.339 | 0.26  | 1         | 12 |
| Sec62        | 0.00462523 | 0.29166351 | 0.253 | 0.183 | 1         | 12 |
| Eif3e.4      | 0.00477169 | 0.29768181 | 0.333 | 0.263 | 1         | 12 |
| Anp32b.4     | 0.00483311 | 0.30892683 | 0.371 | 0.305 | 1         | 12 |
| Prdx5.7      | 0.00485764 | -0.2879414 | 0.231 | 0.338 | 1         | 12 |
| Eif3a        | 0.00598483 | -0.2661437 | 0.194 | 0.291 | 1         | 12 |
| Ndufb5       | 0.00668882 | 0.257605   | 0.317 | 0.244 | 1         | 12 |
| Cytip.8      | 0.00747134 | -0.3751317 | 0.242 | 0.329 | 1         | 12 |
| Itgb2.7      | 0.00981127 | -0.2922452 | 0.183 | 0.27  | 1         | 12 |
| Lgals1.9     | 0.00986819 | 0.33480085 | 0.462 | 0.401 | 1         | 12 |
| Igkv6-15     | 0          | 3.45504337 | 0.95  | 0.011 | 0         | 13 |
| Ighv1-58     | 0          | 3.29225506 | 0.958 | 0.005 | 0         | 13 |
| Mzb1.1       | 3.02E-118  | 1.90059319 | 0.748 | 0.102 | 4.96E-114 | 13 |
| Fcrl5.1      | 8.47E-91   | 1.30220809 | 0.328 | 0.023 | 1.39E-86  | 13 |
| Cd79a.13     | 6.34E-71   | 1.28862611 | 0.95  | 0.241 | 1.04E-66  | 13 |
| Plac8.2      | 8.69E-71   | 1.45459552 | 0.748 | 0.159 | 1.43E-66  | 13 |
| Ctla4.1      | 1.21E-63   | 1.33853277 | 0.42  | 0.055 | 1.99E-59  | 13 |
| Iglc3.2      | 1.07E-56   | 1.3688604  | 0.571 | 0.11  | 1.76E-52  | 13 |
| Blk.1        | 2.64E-55   | 1.19472634 | 0.37  | 0.048 | 4.34E-51  | 13 |
| Nfatc1.1     | 3.85E-54   | 1.48607703 | 0.58  | 0.124 | 6.34E-50  | 13 |
| Iglc2.2      | 3.00E-51   | 1.33835679 | 0.58  | 0.124 | 4.93E-47  | 13 |
| Cd79b.2      | 3.44E-51   | 1.33219115 | 0.714 | 0.19  | 5.66E-47  | 13 |
| Ms4a1.2      | 1.11E-47   | 1.1024838  | 0.597 | 0.13  | 1.82E-43  | 13 |
| Gm30211      | 4.04E-46   | 1.05399164 | 0.294 | 0.036 | 6.65E-42  | 13 |
| Ly6a.4       | 1.25E-41   | 1.11482704 | 0.63  | 0.168 | 2.05E-37  | 13 |
| Ighm.10      | 1.01E-39   | 0.66454863 | 0.874 | 0.407 | 1.65E-35  | 13 |
| D10Wsu102e   | 2.66E-38   | 0.99470715 | 0.277 | 0.039 | 4.38E-34  | 13 |
| Ly6e.10      | 5.09E-38   | 0.86725795 | 0.983 | 0.747 | 8.38E-34  | 13 |
| Ly6d.11      | 6.46E-38   | 1.06364486 | 0.807 | 0.3   | 1.06E-33  | 13 |
| Rpl8.7       | 2.56E-37   | 0.74572249 | 0.983 | 0.916 | 4.21E-33  | 13 |
| Igkc.2       | 7.06E-37   | 0.59985876 | 0.605 | 0.167 | 1.16E-32  | 13 |
| Hepacam2.1   | 4.51E-33   | 0.97818205 | 0.269 | 0.043 | 7.42E-29  | 13 |
| H2-K1.1      | 1.05E-42   | -0.5530148 | 0.813 | 0.846 | 1.73E-38  | 2  |
| Rpl30.5      | 6.78E-32   | 0.63217224 | 1     | 0.952 | 1.12E-27  | 13 |
| Cxcr5.1      | 8.62E-32   | 1.04273108 | 0.286 | 0.048 | 1.42E-27  | 13 |
| Fcmr.2       | 1.35E-30   | 0.94444929 | 0.471 | 0.117 | 2.23E-26  | 13 |
| Apobec3.2    | 2.52E-30   | 1.11248264 | 0.563 | 0.187 | 4.15E-26  | 13 |
| H2-DMb1.2    | 7.03E-24   | -0.55912   | 0.145 | 0.346 | 1.16E-19  | 3  |
| Camk2d.1     | 1.35E-28   | 0.97292372 | 0.454 | 0.123 | 2.22E-24  | 13 |

|             |          |            |       |       |          |    |
|-------------|----------|------------|-------|-------|----------|----|
| Sh3bp5.1    | 2.21E-28 | 1.07624264 | 0.378 | 0.089 | 3.63E-24 | 13 |
| Fcer1g.10   | 5.46E-28 | -2.4341793 | 0.034 | 0.585 | 8.98E-24 | 13 |
| Tyrobp.11   | 8.37E-28 | -2.3453323 | 0.101 | 0.616 | 1.38E-23 | 13 |
| Junb.9      | 1.52E-26 | -1.2132851 | 0.521 | 0.848 | 2.49E-22 | 13 |
| A530040E14R | 3.51E-26 | 0.88403634 | 0.252 | 0.045 | 5.78E-22 | 13 |
| Cd19.2      | 4.64E-26 | 0.89927926 | 0.319 | 0.068 | 7.64E-22 | 13 |
| Lyz2.12     | 2.18E-25 | -3.4351171 | 0.059 | 0.562 | 3.59E-21 | 13 |
| Napsa.11    | 3.30E-25 | 1.01446758 | 0.639 | 0.258 | 5.43E-21 | 13 |
| Ebf1.2      | 4.46E-25 | 0.67713688 | 0.496 | 0.14  | 7.33E-21 | 13 |
| Cst3.10     | 5.36E-24 | -2.3640556 | 0.345 | 0.69  | 8.81E-20 | 13 |
| Bank1.2     | 1.32E-23 | 0.85334406 | 0.496 | 0.157 | 2.16E-19 | 13 |
| Myo1e.1     | 3.35E-23 | 0.89490255 | 0.303 | 0.068 | 5.52E-19 | 13 |
| Dnajc7.1    | 8.79E-23 | 1.08507485 | 0.445 | 0.147 | 1.45E-18 | 13 |
| Cd37.9      | 1.04E-22 | 0.85337332 | 0.706 | 0.324 | 1.71E-18 | 13 |
| Txnip.5     | 3.33E-22 | 0.96470567 | 0.588 | 0.236 | 5.47E-18 | 13 |
| Rpl37.4     | 3.98E-22 | 0.54177093 | 0.958 | 0.929 | 6.55E-18 | 13 |
| mt-Cytb.4   | 6.26E-22 | 0.49380745 | 1     | 0.936 | 1.03E-17 | 13 |
| Rpl3.7      | 1.47E-21 | 0.58185557 | 0.933 | 0.836 | 2.42E-17 | 13 |
| Cd24a.3     | 2.66E-21 | 0.99433505 | 0.412 | 0.132 | 4.38E-17 | 13 |
| Zfp36.8     | 3.92E-21 | -1.7421299 | 0.21  | 0.618 | 6.44E-17 | 13 |
| Dusp1.8     | 5.56E-21 | -1.6069243 | 0.168 | 0.612 | 9.15E-17 | 13 |
| Odc1.3      | 1.26E-20 | 0.97887894 | 0.504 | 0.186 | 2.07E-16 | 13 |
| Cyp4f18.1   | 1.65E-20 | 0.96860802 | 0.319 | 0.085 | 2.72E-16 | 13 |
| Foxp1.8     | 2.12E-20 | 0.85197218 | 0.605 | 0.261 | 3.49E-16 | 13 |
| Gimap5.2    | 3.28E-20 | 0.87405569 | 0.319 | 0.083 | 5.40E-16 | 13 |
| Ifitm3.11   | 4.11E-20 | -2.1648605 | 0.059 | 0.498 | 6.77E-16 | 13 |
| Rpl13.6     | 7.19E-20 | 0.40462602 | 1     | 0.981 | 1.18E-15 | 13 |
| Fcrla       | 1.16E-19 | 0.91326151 | 0.286 | 0.071 | 1.91E-15 | 13 |
| Gm8369      | 5.27E-19 | 0.78227594 | 0.277 | 0.068 | 8.67E-15 | 13 |
| Fos.8       | 8.17E-19 | -1.7767416 | 0.261 | 0.626 | 1.34E-14 | 13 |
| Rac2.11     | 9.35E-19 | 0.81206284 | 0.756 | 0.477 | 1.54E-14 | 13 |
| Tmsb4x.8    | 2.14E-18 | -0.5686339 | 0.983 | 0.993 | 3.52E-14 | 13 |
| Nfkbiz.10   | 2.19E-18 | -2.0264972 | 0.034 | 0.447 | 3.59E-14 | 13 |
| Rps9.3      | 2.58E-17 | 0.37197456 | 0.992 | 0.963 | 4.25E-13 | 13 |
| Ftl1.11     | 2.76E-17 | -1.2121734 | 0.79  | 0.892 | 4.54E-13 | 13 |
| Rps20.7     | 3.77E-17 | 0.39081448 | 0.992 | 0.972 | 6.21E-13 | 13 |
| Ltb.6       | 3.92E-17 | 0.66243894 | 0.521 | 0.202 | 6.45E-13 | 13 |
| Ptprcap.12  | 4.97E-17 | 0.78934978 | 0.597 | 0.26  | 8.17E-13 | 13 |
| Cybb.9      | 9.13E-17 | 0.91593748 | 0.622 | 0.325 | 1.50E-12 | 13 |
| Ccl6.12     | 9.70E-17 | -2.1554321 | 0.034 | 0.418 | 1.60E-12 | 13 |
| Tsc22d3.2   | 9.82E-17 | 1.10397749 | 0.471 | 0.198 | 1.61E-12 | 13 |
| Alox5ap.12  | 1.06E-16 | -1.7403517 | 0.017 | 0.403 | 1.75E-12 | 13 |
| Gm15987.1   | 2.03E-16 | 0.78860049 | 0.252 | 0.065 | 3.34E-12 | 13 |

|            |          |            |       |       |          |    |
|------------|----------|------------|-------|-------|----------|----|
| Mt1.12     | 2.31E-16 | -2.3852608 | 0.042 | 0.422 | 3.80E-12 | 13 |
| Gpx1.12    | 2.98E-16 | -1.2358914 | 0.496 | 0.715 | 4.90E-12 | 13 |
| Rps15a.8   | 3.30E-16 | 0.38130723 | 0.992 | 0.95  | 5.43E-12 | 13 |
| Rps18.7    | 4.32E-16 | 0.50399866 | 0.941 | 0.869 | 7.10E-12 | 13 |
| Cd55.1     | 4.37E-16 | 0.7625807  | 0.311 | 0.091 | 7.19E-12 | 13 |
| Tmem176b.9 | 4.98E-16 | -1.5984563 | 0.059 | 0.445 | 8.20E-12 | 13 |
| Dok3.1     | 5.40E-16 | 0.76733292 | 0.294 | 0.086 | 8.89E-12 | 13 |
| Ctsb.12    | 7.33E-16 | -1.8656167 | 0.118 | 0.481 | 1.21E-11 | 13 |
| mt-Atp8.9  | 1.05E-15 | 0.39782206 | 0.992 | 0.928 | 1.73E-11 | 13 |
| mt-Nd4l.6  | 1.12E-15 | 0.42261446 | 0.975 | 0.9   | 1.85E-11 | 13 |
| Rps7.6     | 1.34E-15 | 0.38890189 | 0.975 | 0.941 | 2.21E-11 | 13 |
| Rps19.7    | 2.34E-15 | 0.38958527 | 0.966 | 0.933 | 3.84E-11 | 13 |
| Egr1.10    | 2.98E-15 | -1.8594452 | 0.092 | 0.463 | 4.90E-11 | 13 |
| Uchl3.1    | 2.98E-15 | 0.76649651 | 0.286 | 0.086 | 4.91E-11 | 13 |
| Rps27.9    | 3.14E-15 | 0.43630852 | 0.966 | 0.901 | 5.17E-11 | 13 |
| Ifitm2.11  | 6.36E-15 | -1.6052175 | 0.034 | 0.396 | 1.05E-10 | 13 |
| Gimap6.4   | 7.89E-15 | 0.74320242 | 0.462 | 0.187 | 1.30E-10 | 13 |
| Vim.10     | 8.57E-15 | -1.1843715 | 0.303 | 0.627 | 1.41E-10 | 13 |
| Rps26.8    | 1.32E-14 | 0.37893783 | 0.983 | 0.934 | 2.18E-10 | 13 |
| Tagln2.9   | 1.44E-14 | -1.2001721 | 0.134 | 0.495 | 2.36E-10 | 13 |
| Fth1.10    | 1.74E-14 | -0.7674705 | 0.924 | 0.958 | 2.85E-10 | 13 |
| mt-Nd5.6   | 3.38E-14 | 0.67595362 | 0.849 | 0.657 | 5.56E-10 | 13 |
| Rpl9-ps6.8 | 8.17E-14 | 0.38556546 | 0.958 | 0.905 | 1.34E-09 | 13 |
| Pold4.2    | 9.96E-14 | 0.78458118 | 0.403 | 0.164 | 1.64E-09 | 13 |
| Crip1.11   | 1.03E-13 | -1.1349106 | 0.513 | 0.723 | 1.69E-09 | 13 |
| Csf1r.12   | 1.58E-13 | -1.8021852 | 0.008 | 0.338 | 2.59E-09 | 13 |
| Gimap1.1   | 2.46E-13 | 0.68427734 | 0.303 | 0.099 | 4.05E-09 | 13 |
| Pltp.12    | 2.47E-13 | -1.8195271 | 0.017 | 0.342 | 4.07E-09 | 13 |
| Selenop.12 | 2.69E-13 | -2.3579934 | 0.101 | 0.421 | 4.43E-09 | 13 |
| Rps3a1.6   | 2.90E-13 | 0.32470729 | 0.983 | 0.964 | 4.76E-09 | 13 |
| Atox1.12   | 3.03E-13 | -1.1702243 | 0.126 | 0.461 | 4.98E-09 | 13 |
| C1qb.12    | 5.94E-13 | -2.609238  | 0.042 | 0.357 | 9.77E-09 | 13 |
| C1qc.12    | 7.81E-13 | -2.6127886 | 0.025 | 0.339 | 1.28E-08 | 13 |
| Pf4.13     | 9.05E-13 | -2.6345069 | 0     | 0.311 | 1.49E-08 | 13 |
| Rps13.6    | 1.11E-12 | 0.4102527  | 0.941 | 0.83  | 1.82E-08 | 13 |
| Ier3.9     | 2.50E-12 | -1.8248521 | 0.025 | 0.33  | 4.11E-08 | 13 |
| Emp3.7     | 2.60E-12 | -1.0618678 | 0.126 | 0.438 | 4.27E-08 | 13 |
| Rpsa.7     | 2.64E-12 | 0.33610771 | 0.983 | 0.934 | 4.35E-08 | 13 |
| Psm14      | 2.73E-12 | 0.79501558 | 0.261 | 0.086 | 4.49E-08 | 13 |
| Ifngr1.8   | 2.90E-12 | -1.2546708 | 0.067 | 0.387 | 4.76E-08 | 13 |
| C1qa.12    | 3.05E-12 | -2.5198071 | 0.034 | 0.334 | 5.01E-08 | 13 |
| Rps24.7    | 3.32E-12 | 0.27280908 | 1     | 0.988 | 5.46E-08 | 13 |
| Rpl32.6    | 4.18E-12 | 0.31992965 | 0.983 | 0.949 | 6.87E-08 | 13 |

|             |          |            |       |       |          |    |
|-------------|----------|------------|-------|-------|----------|----|
| Nfkbia.11   | 5.27E-12 | -1.2203113 | 0.227 | 0.525 | 8.67E-08 | 13 |
| Sub1.7      | 6.82E-12 | 0.61784777 | 0.697 | 0.46  | 1.12E-07 | 13 |
| Pdia4.1     | 6.83E-12 | 0.7986369  | 0.353 | 0.145 | 1.12E-07 | 13 |
| Fosb.9      | 7.84E-12 | -1.1236195 | 0.185 | 0.507 | 1.29E-07 | 13 |
| Vars.2      | 8.08E-12 | 0.77815263 | 0.319 | 0.121 | 1.33E-07 | 13 |
| Syk.3       | 8.41E-12 | 0.8249169  | 0.437 | 0.209 | 1.38E-07 | 13 |
| Mrc1.12     | 9.41E-12 | -1.7176178 | 0.017 | 0.31  | 1.55E-07 | 13 |
| mt-Co3.4    | 1.01E-11 | 0.28322737 | 0.983 | 0.975 | 1.67E-07 | 13 |
| Psap.10     | 1.13E-11 | -1.0220428 | 0.496 | 0.679 | 1.86E-07 | 13 |
| Itm2b.10    | 1.28E-11 | -0.9537965 | 0.664 | 0.789 | 2.11E-07 | 13 |
| F13a1.11    | 1.77E-11 | -1.7990841 | 0     | 0.284 | 2.90E-07 | 13 |
| Npc2.9      | 1.83E-11 | -0.9449839 | 0.21  | 0.517 | 3.01E-07 | 13 |
| Pfdn5.1     | 3.14E-11 | 0.54127483 | 0.756 | 0.602 | 5.16E-07 | 13 |
| Rpl19.7     | 3.40E-11 | 0.31028266 | 0.992 | 0.954 | 5.59E-07 | 13 |
| Arpc1b.9    | 3.65E-11 | -0.7571813 | 0.353 | 0.627 | 6.00E-07 | 13 |
| Rpl27a.6    | 4.64E-11 | 0.37266304 | 0.966 | 0.888 | 7.63E-07 | 13 |
| Mtss1.2     | 5.46E-11 | 0.76518223 | 0.353 | 0.15  | 8.99E-07 | 13 |
| Tmem176a.9  | 6.67E-11 | -1.2711172 | 0.05  | 0.338 | 1.10E-06 | 13 |
| Rps11.6     | 9.75E-11 | 0.2913425  | 1     | 0.966 | 1.60E-06 | 13 |
| Zfp36l2.4   | 1.13E-10 | -1.0805744 | 0.092 | 0.384 | 1.86E-06 | 13 |
| Cd68.9      | 1.15E-10 | -1.2567504 | 0.008 | 0.276 | 1.89E-06 | 13 |
| Rgs10.9     | 1.16E-10 | -1.1619994 | 0.008 | 0.28  | 1.91E-06 | 13 |
| Fcgrt.11    | 1.93E-10 | -1.4035526 | 0     | 0.261 | 3.18E-06 | 13 |
| Rps3.7      | 2.62E-10 | 0.29582639 | 0.975 | 0.912 | 4.32E-06 | 13 |
| Klf4.9      | 2.66E-10 | -1.4517    | 0.101 | 0.379 | 4.38E-06 | 13 |
| Ahnak.8     | 2.94E-10 | -0.9244214 | 0.277 | 0.551 | 4.83E-06 | 13 |
| Gstm1.11    | 3.05E-10 | 0.50092628 | 0.866 | 0.642 | 5.02E-06 | 13 |
| Rac1.4      | 3.99E-10 | -0.8602994 | 0.143 | 0.438 | 6.57E-06 | 13 |
| Lgals1.10   | 4.01E-10 | -1.1055073 | 0.118 | 0.407 | 6.59E-06 | 13 |
| Man1a.1     | 4.94E-10 | 0.71017176 | 0.378 | 0.175 | 8.12E-06 | 13 |
| Hvcn1.2     | 5.85E-10 | 0.5436154  | 0.261 | 0.092 | 9.63E-06 | 13 |
| Actg1.7     | 7.29E-10 | -0.5417229 | 0.84  | 0.902 | 1.20E-05 | 13 |
| Zfp706.1    | 7.41E-10 | 0.65961412 | 0.538 | 0.32  | 1.22E-05 | 13 |
| Rps2.6      | 7.67E-10 | 0.33377832 | 0.975 | 0.943 | 1.26E-05 | 13 |
| Zyx.10      | 8.35E-10 | -1.1169735 | 0.017 | 0.267 | 1.37E-05 | 13 |
| Mafb.11     | 8.81E-10 | -1.7109964 | 0.017 | 0.267 | 1.45E-05 | 13 |
| Cd14.12     | 1.30E-09 | -1.4671352 | 0.017 | 0.264 | 2.14E-05 | 13 |
| Ccl2.12     | 1.30E-09 | -2.0112631 | 0.034 | 0.285 | 2.15E-05 | 13 |
| Cd52.9      | 1.33E-09 | 0.47388817 | 0.857 | 0.732 | 2.18E-05 | 13 |
| Ifi27l2a.11 | 1.60E-09 | -1.3881287 | 0.151 | 0.406 | 2.63E-05 | 13 |
| Rpl34.5     | 1.60E-09 | 0.27521035 | 0.966 | 0.946 | 2.64E-05 | 13 |
| Lgmn.12     | 2.41E-09 | -1.2464432 | 0.034 | 0.283 | 3.97E-05 | 13 |
| Cxcl2.11    | 2.85E-09 | -2.3535326 | 0.017 | 0.254 | 4.68E-05 | 13 |



|            |          |            |       |       |            |    |
|------------|----------|------------|-------|-------|------------|----|
| Cd38       | 2.88E-09 | 0.5692046  | 0.286 | 0.112 | 4.73E-05   | 13 |
| Cfp.11     | 2.93E-09 | -1.1123675 | 0.059 | 0.316 | 4.82E-05   | 13 |
| Jun.12     | 3.11E-09 | -1.3427565 | 0.21  | 0.466 | 5.12E-05   | 13 |
| Grn.9      | 4.59E-09 | -1.0913606 | 0.118 | 0.38  | 7.55E-05   | 13 |
| Gimap3.5   | 4.71E-09 | 0.54051792 | 0.361 | 0.16  | 7.75E-05   | 13 |
| Anxa5.8    | 4.75E-09 | -0.9243159 | 0.084 | 0.346 | 7.82E-05   | 13 |
| Wfdc17.10  | 4.76E-09 | -1.3402267 | 0.084 | 0.334 | 7.83E-05   | 13 |
| B2m.8      | 4.92E-09 | -0.4971004 | 0.647 | 0.81  | 8.10E-05   | 13 |
| Pkig.1     | 5.74E-09 | 0.57335372 | 0.353 | 0.159 | 9.44E-05   | 13 |
| Klf6.11    | 5.81E-09 | -0.8618377 | 0.269 | 0.534 | 9.56E-05   | 13 |
| Gimap4.4   | 6.46E-09 | 0.49740151 | 0.353 | 0.153 | 0.00010624 | 13 |
| Sp140.2    | 8.30E-09 | 0.63202817 | 0.353 | 0.167 | 0.00013654 | 13 |
| Cd69.2     | 9.78E-09 | 0.65550096 | 0.261 | 0.103 | 0.00016086 | 13 |
| Efhd2.10   | 1.05E-08 | -0.9028312 | 0.05  | 0.3   | 0.00017233 | 13 |
| Lgals3.12  | 1.23E-08 | -1.092867  | 0.109 | 0.353 | 0.00020203 | 13 |
| Tnfaip3.8  | 1.27E-08 | -1.0129504 | 0.084 | 0.332 | 0.00020893 | 13 |
| Itgb2.8    | 1.36E-08 | -0.9437195 | 0.034 | 0.271 | 0.00022297 | 13 |
| Anxa2.12   | 1.36E-08 | -1.0298941 | 0.042 | 0.279 | 0.00022366 | 13 |
| H2-DMb1.4  | 2.88E-10 | -0.5599479 | 0.195 | 0.335 | 4.73E-06   | 6  |
| Eef1d.4    | 2.46E-08 | 0.57927649 | 0.58  | 0.409 | 0.00040386 | 13 |
| Tcf4.2     | 2.69E-08 | 0.70291647 | 0.319 | 0.151 | 0.00044316 | 13 |
| Atpif1.12  | 4.24E-08 | -0.8295959 | 0.076 | 0.319 | 0.00069813 | 13 |
| Mif4gd.1   | 4.53E-08 | 0.58218143 | 0.277 | 0.118 | 0.00074591 | 13 |
| Kctd12.10  | 4.97E-08 | -0.9325388 | 0.134 | 0.374 | 0.00081811 | 13 |
| Rpl14.9    | 5.02E-08 | 0.34148925 | 0.882 | 0.785 | 0.0008259  | 13 |
| Pfn1.4     | 5.17E-08 | -0.4663219 | 0.731 | 0.861 | 0.0008507  | 13 |
| Rap1b.7    | 5.23E-08 | -0.7574899 | 0.168 | 0.419 | 0.0008596  | 13 |
| Eif4b.1    | 5.23E-08 | 0.64484799 | 0.378 | 0.195 | 0.00086086 | 13 |
| Actb.7     | 5.51E-08 | -0.3189831 | 0.975 | 0.994 | 0.00090688 | 13 |
| Rpl12.9    | 6.04E-08 | 0.40695241 | 0.857 | 0.76  | 0.0009938  | 13 |
| Man2b1.9   | 6.70E-08 | -0.82034   | 0.067 | 0.303 | 0.00110131 | 13 |
| Gnai2.8    | 6.91E-08 | -0.6872875 | 0.286 | 0.532 | 0.00113667 | 13 |
| Zbtb20.1   | 7.11E-08 | 0.71175016 | 0.303 | 0.137 | 0.00117    | 13 |
| Neat1.11   | 7.26E-08 | -1.0333884 | 0.101 | 0.33  | 0.00119457 | 13 |
| Nrros.11   | 8.43E-08 | -0.8519504 | 0.059 | 0.288 | 0.00138612 | 13 |
| Myl6.5     | 9.68E-08 | -0.581639  | 0.454 | 0.656 | 0.00159278 | 13 |
| Lamp1.11   | 9.69E-08 | -0.8298459 | 0.176 | 0.418 | 0.0015944  | 13 |
| Tmod3.1    | 9.72E-08 | 0.54633235 | 0.319 | 0.151 | 0.00159909 | 13 |
| Cnp.1      | 1.12E-07 | 0.59676531 | 0.277 | 0.123 | 0.00184616 | 13 |
| Gadd45b.10 | 1.21E-07 | -1.0192571 | 0.042 | 0.254 | 0.00199416 | 13 |
| Zeb2.11    | 1.34E-07 | -0.8597093 | 0.076 | 0.299 | 0.00220649 | 13 |
| Clta.9     | 1.79E-07 | -0.6682248 | 0.336 | 0.552 | 0.00294514 | 13 |
| Fyb.8      | 1.86E-07 | -0.8855791 | 0.042 | 0.253 | 0.00305683 | 13 |

|            |          |            |       |       |            |    |
|------------|----------|------------|-------|-------|------------|----|
| Ctsc.10    | 2.08E-07 | -1.0134018 | 0.21  | 0.418 | 0.00341366 | 13 |
| ler5.9     | 2.09E-07 | -0.6897403 | 0.126 | 0.375 | 0.00344094 | 13 |
| Cox5a.4    | 2.31E-07 | -0.6960851 | 0.143 | 0.384 | 0.0037919  | 13 |
| Rpl36.7    | 2.34E-07 | 0.28388965 | 0.924 | 0.899 | 0.00384712 | 13 |
| Rel.9      | 2.56E-07 | 0.57574159 | 0.471 | 0.278 | 0.00421773 | 13 |
| Malat1.6   | 2.99E-07 | 0.28715708 | 0.992 | 0.935 | 0.00492441 | 13 |
| App.8      | 3.31E-07 | -0.9021287 | 0.067 | 0.277 | 0.00544977 | 13 |
| ler2.10    | 3.33E-07 | -0.7849322 | 0.345 | 0.559 | 0.00547749 | 13 |
| Nr4a1.7    | 8.88E-07 | -0.6503041 | 0.261 | 0.509 | 0.01460534 | 13 |
| Sem1.6     | 1.03E-06 | -0.61945   | 0.345 | 0.552 | 0.01687046 | 13 |
| Atp6v0c.10 | 1.10E-06 | -0.7330149 | 0.21  | 0.427 | 0.01814693 | 13 |
| Marcks.10  | 1.23E-06 | -0.8064797 | 0.126 | 0.335 | 0.02021691 | 13 |
| Kdm6b.9    | 1.31E-06 | -0.6535879 | 0.101 | 0.315 | 0.02151951 | 13 |
| Ppp1r18.5  | 1.84E-06 | -0.6982129 | 0.067 | 0.262 | 0.03032927 | 13 |
| Ctsa.10    | 1.86E-06 | -0.7529409 | 0.084 | 0.287 | 0.03057623 | 13 |
| H2afz.12   | 2.15E-06 | -0.6764842 | 0.395 | 0.591 | 0.03532202 | 13 |
| Rab4b.1    | 3.39E-06 | 0.60422224 | 0.252 | 0.121 | 0.05568457 | 13 |
| Rps6.7     | 3.57E-06 | 0.29873943 | 0.891 | 0.77  | 0.05870338 | 13 |
| Ncf4.2     | 3.73E-06 | 0.56305382 | 0.261 | 0.127 | 0.06139173 | 13 |
| Hexa.9     | 4.02E-06 | -0.7515402 | 0.101 | 0.295 | 0.06615813 | 13 |
| Ly86.7     | 4.38E-06 | 0.45905897 | 0.496 | 0.315 | 0.07202657 | 13 |
| Atp6v0b.9  | 5.26E-06 | -0.5854257 | 0.151 | 0.363 | 0.08647109 | 13 |
| Pde4b.8    | 5.70E-06 | 0.45181406 | 0.58  | 0.415 | 0.09378506 | 13 |
| Ctsd.11    | 6.69E-06 | -0.7478567 | 0.101 | 0.293 | 0.11004286 | 13 |
| Serf2.8    | 6.71E-06 | -0.3966934 | 0.639 | 0.764 | 0.11038389 | 13 |
| Tmem50a.3  | 6.96E-06 | -0.6068336 | 0.143 | 0.349 | 0.11450308 | 13 |
| Eif3h.4    | 7.22E-06 | 0.34124048 | 0.58  | 0.407 | 0.11871856 | 13 |
| Cdc42.2    | 7.54E-06 | -0.5187599 | 0.336 | 0.541 | 0.12406092 | 13 |
| H2-Q7.1    | 2.07E-09 | -0.5703948 | 0.182 | 0.263 | 3.40E-05   | 2  |
| Lyn.6      | 1.08E-05 | 0.6280064  | 0.378 | 0.239 | 0.17727811 | 13 |
| S100a10.11 | 1.14E-05 | -0.6248245 | 0.269 | 0.463 | 0.18825644 | 13 |
| Cotl1.5    | 1.15E-05 | -0.6557088 | 0.176 | 0.365 | 0.18859992 | 13 |
| Rilpl2.2   | 1.43E-05 | 0.48169729 | 0.361 | 0.215 | 0.2357115  | 13 |
| Mcl1.10    | 1.44E-05 | -0.6563046 | 0.244 | 0.43  | 0.23615189 | 13 |
| Gltp.8     | 1.48E-05 | -0.6535183 | 0.084 | 0.261 | 0.24288107 | 13 |
| Sh3bgrl3.7 | 1.52E-05 | -0.4122614 | 0.605 | 0.75  | 0.25007565 | 13 |
| Rpl21.6    | 2.45E-05 | 0.26455204 | 0.79  | 0.676 | 0.40253253 | 13 |
| Blnk.1     | 2.46E-05 | 0.44340926 | 0.252 | 0.125 | 0.40516945 | 13 |
| Dnaja1.4   | 2.60E-05 | -0.6286247 | 0.084 | 0.259 | 0.42766715 | 13 |
| Flna.9     | 2.88E-05 | -0.586097  | 0.118 | 0.301 | 0.47352732 | 13 |
| Laptm5.4   | 3.25E-05 | -0.4443107 | 0.479 | 0.657 | 0.53538748 | 13 |
| Arf5.6     | 3.27E-05 | -0.536905  | 0.227 | 0.415 | 0.53754027 | 13 |
| Arpc2.8    | 3.28E-05 | -0.3524297 | 0.521 | 0.669 | 0.53890476 | 13 |

|          |            |            |       |       |            |    |
|----------|------------|------------|-------|-------|------------|----|
| H2afy.7  | 3.60E-05   | -0.5231895 | 0.084 | 0.255 | 0.59256877 | 13 |
| Calm1.4  | 3.94E-05   | -0.4077583 | 0.546 | 0.72  | 0.64840501 | 13 |
| Wnk1.5   | 3.96E-05   | -0.5648488 | 0.092 | 0.262 | 0.65118862 | 13 |
| Sdcbp.7  | 3.99E-05   | -0.5152442 | 0.101 | 0.278 | 0.65563105 | 13 |
| Rpl22.5  | 4.12E-05   | 0.28466194 | 0.874 | 0.827 | 0.67752686 | 13 |
| Tpm3.2   | 4.26E-05   | -0.5111609 | 0.328 | 0.497 | 0.70011246 | 13 |
| Ywhaz.3  | 5.38E-05   | 0.29210072 | 0.672 | 0.527 | 0.88437686 | 13 |
| Polr2a.3 | 5.41E-05   | 0.43914562 | 0.353 | 0.213 | 0.88938376 | 13 |
| Gm2a.12  | 5.65E-05   | -0.7187786 | 0.126 | 0.289 | 0.92978488 | 13 |
| Gng5.7   | 5.75E-05   | -0.4687502 | 0.445 | 0.599 | 0.9459157  | 13 |
| Oaz1.3   | 5.89E-05   | -0.306629  | 0.639 | 0.777 | 0.96949378 | 13 |
| Tgfb1.3  | 7.52E-05   | -0.5142138 | 0.151 | 0.331 | 1          | 13 |
| Dbi.8    | 7.98E-05   | -0.5150327 | 0.126 | 0.294 | 1          | 13 |
| Myh9.6   | 8.25E-05   | 0.41221367 | 0.63  | 0.5   | 1          | 13 |
| Cfl1.2   | 8.46E-05   | -0.3362    | 0.681 | 0.79  | 1          | 13 |
| Arcp4.3  | 9.27E-05   | -0.527985  | 0.168 | 0.345 | 1          | 13 |
| Ndufb8.2 | 9.57E-05   | -0.5247957 | 0.101 | 0.265 | 1          | 13 |
| Stk17b.6 | 9.85E-05   | 0.39705479 | 0.58  | 0.435 | 1          | 13 |
| Cstb.7   | 0.00011701 | -0.5586265 | 0.101 | 0.26  | 1          | 13 |
| Ccnl1.9  | 0.00012612 | -0.4664891 | 0.134 | 0.309 | 1          | 13 |
| Ncl.6    | 0.00016559 | 0.44381118 | 0.496 | 0.373 | 1          | 13 |
| Rbms1.6  | 0.00017374 | -0.4717749 | 0.101 | 0.259 | 1          | 13 |
| Btg2.7   | 0.00017792 | -0.4154631 | 0.529 | 0.673 | 1          | 13 |
| Ehd4.10  | 0.00017847 | -0.6356516 | 0.118 | 0.269 | 1          | 13 |
| Nol7.5   | 0.00018334 | 0.42752998 | 0.403 | 0.268 | 1          | 13 |
| Npm1.6   | 0.00018477 | 0.38035237 | 0.622 | 0.529 | 1          | 13 |
| Tspo.6   | 0.00018717 | -0.4589273 | 0.244 | 0.426 | 1          | 13 |
| Eif3f.7  | 0.00020546 | 0.33002435 | 0.723 | 0.616 | 1          | 13 |
| Puf60    | 0.00023676 | 0.44308262 | 0.261 | 0.148 | 1          | 13 |
| Atf3.9   | 0.00025975 | -0.7825298 | 0.378 | 0.509 | 1          | 13 |
| Ptms.9   | 0.00029611 | -0.5374312 | 0.134 | 0.29  | 1          | 13 |
| Eif4a2.1 | 0.00029691 | 0.48291715 | 0.269 | 0.156 | 1          | 13 |
| Selplg.8 | 0.00032991 | -0.582142  | 0.16  | 0.308 | 1          | 13 |
| Pou2f2.3 | 0.00033379 | 0.31796905 | 0.328 | 0.194 | 1          | 13 |
| Ctsh.9   | 0.00036341 | -0.4577247 | 0.218 | 0.388 | 1          | 13 |
| Chd4     | 0.00038543 | -0.493083  | 0.126 | 0.272 | 1          | 13 |
| Arf6.4   | 0.00040106 | 0.44810157 | 0.361 | 0.244 | 1          | 13 |
| Abracl.6 | 0.00040477 | -0.3855521 | 0.109 | 0.263 | 1          | 13 |
| Fam49b.5 | 0.00046392 | 0.43293224 | 0.42  | 0.298 | 1          | 13 |
| Prdx5.8  | 0.00049974 | -0.5723494 | 0.193 | 0.338 | 1          | 13 |
| Cox8a.2  | 0.00052764 | -0.2746662 | 0.563 | 0.691 | 1          | 13 |
| Zfand5.8 | 0.00053474 | -0.4498063 | 0.118 | 0.264 | 1          | 13 |
| Hmgn1.2  | 0.00058949 | 0.4224265  | 0.345 | 0.227 | 1          | 13 |

|               |            |            |       |       |          |    |
|---------------|------------|------------|-------|-------|----------|----|
| Cebpb.12      | 0.0006555  | -0.6601994 | 0.193 | 0.331 | 1        | 13 |
| Aldoa.6       | 0.00067639 | 0.28862304 | 0.504 | 0.365 | 1        | 13 |
| Rpl36a.7      | 0.00070567 | 0.25425266 | 0.824 | 0.76  | 1        | 13 |
| Capg.8        | 0.00072335 | 0.38062081 | 0.387 | 0.256 | 1        | 13 |
| Plp2.5        | 0.0007412  | 0.3633093  | 0.261 | 0.154 | 1        | 13 |
| Mbnl1.3       | 0.00074521 | -0.4424598 | 0.193 | 0.342 | 1        | 13 |
| Atp5g2.2      | 0.00100803 | 0.35499677 | 0.597 | 0.505 | 1        | 13 |
| Akr1a1.8      | 0.0010331  | -0.3783364 | 0.202 | 0.355 | 1        | 13 |
| Gm26917.2     | 0.00104441 | 0.67736052 | 0.487 | 0.4   | 1        | 13 |
| Igkv1-117.2   | 0.0010848  | -0.8293403 | 0.328 | 0.202 | 1        | 13 |
| Ptp4a2.5      | 0.00110596 | -0.4024889 | 0.16  | 0.3   | 1        | 13 |
| Uvrag.1       | 0.0011292  | 0.45748212 | 0.269 | 0.171 | 1        | 13 |
| Mdh1.2        | 0.00114406 | 0.35883509 | 0.319 | 0.212 | 1        | 13 |
| Ppp1r15a.8    | 0.00116962 | -0.4458008 | 0.218 | 0.359 | 1        | 13 |
| Vamp8.8       | 0.00122921 | -0.4195109 | 0.193 | 0.344 | 1        | 13 |
| Jund.9        | 0.00125818 | -0.411861  | 0.605 | 0.684 | 1        | 13 |
| Eef1b2.5      | 0.00126456 | 0.25898089 | 0.748 | 0.669 | 1        | 13 |
| AY036118.6    | 0.0012829  | 0.59560365 | 0.882 | 0.783 | 1        | 13 |
| Uqcr10.2      | 0.0013517  | -0.448618  | 0.143 | 0.274 | 1        | 13 |
| 1810037117Ril | 0.0014612  | -0.4185081 | 0.143 | 0.279 | 1        | 13 |
| Ezr.5         | 0.00163943 | 0.37580883 | 0.345 | 0.235 | 1        | 13 |
| Gabarap.6     | 0.00168062 | -0.3872752 | 0.445 | 0.567 | 1        | 13 |
| Erp29.8       | 0.00190682 | 0.38111802 | 0.471 | 0.365 | 1        | 13 |
| Snx20.2       | 0.00192541 | 0.3934023  | 0.261 | 0.165 | 1        | 13 |
| Fxyd5.12      | 0.0020099  | -0.4751992 | 0.345 | 0.467 | 1        | 13 |
| Gdi2.6        | 0.00203503 | 0.38572505 | 0.487 | 0.373 | 1        | 13 |
| Rrbp1.9       | 0.00210954 | -0.3590256 | 0.202 | 0.351 | 1        | 13 |
| Txn1.6        | 0.00232497 | -0.4578797 | 0.134 | 0.253 | 1        | 13 |
| H2-DMa.1      | 2.50E-34   | -0.6097602 | 0.185 | 0.449 | 4.12E-30 | 3  |
| Xist.6        | 0.00236151 | 0.3418065  | 0.588 | 0.473 | 1        | 13 |
| Tmsb10.10     | 0.00241756 | -0.4862964 | 0.924 | 0.784 | 1        | 13 |
| Reep5.3       | 0.00247645 | -0.3087926 | 0.218 | 0.356 | 1        | 13 |
| Clic4.10      | 0.00253181 | -0.3549238 | 0.126 | 0.254 | 1        | 13 |
| Cd53.1        | 0.00253664 | -0.3459279 | 0.185 | 0.318 | 1        | 13 |
| Ostf1.4       | 0.00271764 | -0.3651396 | 0.185 | 0.316 | 1        | 13 |
| Ywhae.1       | 0.00278092 | -0.2859972 | 0.126 | 0.261 | 1        | 13 |
| Prr13.5       | 0.00294526 | 0.30712242 | 0.37  | 0.265 | 1        | 13 |
| Glud1.3       | 0.00299938 | -0.3397455 | 0.143 | 0.27  | 1        | 13 |
| Atp6v1f       | 0.00308372 | -0.3024121 | 0.193 | 0.33  | 1        | 13 |
| Fus           | 0.0030935  | 0.36605227 | 0.412 | 0.309 | 1        | 13 |
| Gnb2.3        | 0.00368324 | -0.2766175 | 0.269 | 0.43  | 1        | 13 |
| Atp6v1g1.3    | 0.00406901 | -0.2771724 | 0.16  | 0.294 | 1        | 13 |
| Cd83.9        | 0.00413273 | 0.26921272 | 0.58  | 0.469 | 1        | 13 |

|              |            |            |       |       |           |    |
|--------------|------------|------------|-------|-------|-----------|----|
| Bri3.10      | 0.00445194 | -0.3922443 | 0.244 | 0.374 | 1         | 13 |
| Cox6b1.1     | 0.00447696 | -0.2796817 | 0.277 | 0.429 | 1         | 13 |
| Sec61b.6     | 0.00461656 | -0.3561251 | 0.353 | 0.484 | 1         | 13 |
| Ddx39b       | 0.00472372 | 0.36577728 | 0.252 | 0.166 | 1         | 13 |
| Pafah1b1     | 0.00476363 | -0.3588499 | 0.143 | 0.261 | 1         | 13 |
| Eif3e.5      | 0.00492629 | 0.32176431 | 0.361 | 0.264 | 1         | 13 |
| Lamtor2      | 0.00494153 | -0.3945502 | 0.151 | 0.266 | 1         | 13 |
| Kmt2e.4      | 0.00518218 | 0.260956   | 0.378 | 0.269 | 1         | 13 |
| Cltc.10      | 0.00521385 | -0.3751899 | 0.21  | 0.333 | 1         | 13 |
| Eef1g.4      | 0.00523337 | 0.33212277 | 0.462 | 0.374 | 1         | 13 |
| Smim14.2     | 0.00541178 | 0.38921621 | 0.269 | 0.181 | 1         | 13 |
| Rhog.2       | 0.00544935 | -0.3392832 | 0.168 | 0.294 | 1         | 13 |
| Socs3.11     | 0.00556116 | -0.3968905 | 0.16  | 0.281 | 1         | 13 |
| Psmb1.4      | 0.00614826 | 0.29719113 | 0.403 | 0.31  | 1         | 13 |
| Uqcrq.4      | 0.00631019 | -0.3239222 | 0.21  | 0.338 | 1         | 13 |
| Pld4.8       | 0.0069009  | -0.3464407 | 0.202 | 0.327 | 1         | 13 |
| Pcbp2.1      | 0.00692795 | 0.29427278 | 0.538 | 0.449 | 1         | 13 |
| Atp5j.2      | 0.00712063 | -0.3421611 | 0.252 | 0.383 | 1         | 13 |
| Arpc5.2      | 0.00722591 | -0.4019953 | 0.277 | 0.38  | 1         | 13 |
| Calm3.2      | 0.00735905 | -0.3681769 | 0.143 | 0.252 | 1         | 13 |
| Tln1.3       | 0.00753319 | -0.3441623 | 0.311 | 0.429 | 1         | 13 |
| Hnrnpa1.4    | 0.00785221 | 0.45308636 | 0.37  | 0.301 | 1         | 13 |
| Scaf11       | 0.0080473  | 0.55051598 | 0.261 | 0.182 | 1         | 13 |
| Ywhah.5      | 0.00805156 | -0.4071909 | 0.16  | 0.265 | 1         | 13 |
| Srsf11.1     | 0.00833226 | 0.32541278 | 0.261 | 0.178 | 1         | 13 |
| Calm2.9      | 0.00840629 | -0.3509932 | 0.261 | 0.389 | 1         | 13 |
| 2010107E04Ri | 0.00844341 | -0.3516526 | 0.193 | 0.304 | 1         | 13 |
| Cnbp.8       | 0.00897652 | 0.33041706 | 0.504 | 0.428 | 1         | 13 |
| 2410015M20F  | 0.00938792 | 0.29417959 | 0.286 | 0.198 | 1         | 13 |
| Canx.5       | 0.00949786 | -0.2618564 | 0.168 | 0.289 | 1         | 13 |
| Ndufb10      | 0.0099682  | -0.3691191 | 0.168 | 0.275 | 1         | 13 |
| Prg2         | 0          | 1.47694767 | 0.291 | 0     | 0         | 14 |
| Derl3        | 0          | 1.32668791 | 0.418 | 0.002 | 0         | 14 |
| Jchain       | 1.21E-307  | 5.03610494 | 0.891 | 0.052 | 1.99E-303 | 14 |
| Eaf2         | 1.37E-242  | 0.85862964 | 0.291 | 0.004 | 2.26E-238 | 14 |
| Iglc1.1      | 1.27E-216  | 2.15606412 | 0.645 | 0.035 | 2.09E-212 | 14 |
| Slpi         | 4.27E-203  | 2.25441002 | 0.418 | 0.014 | 7.02E-199 | 14 |
| Txndc5       | 2.74E-183  | 2.12399887 | 0.809 | 0.072 | 4.51E-179 | 14 |
| Mzb1.2       | 3.92E-177  | 2.55693581 | 0.918 | 0.101 | 6.45E-173 | 14 |
| Plpp5        | 2.39E-150  | 0.90627314 | 0.318 | 0.011 | 3.92E-146 | 14 |
| Iglv1        | 4.83E-150  | 4.52550782 | 0.618 | 0.047 | 7.94E-146 | 14 |
| Creld2       | 1.51E-144  | 1.66268686 | 0.7   | 0.065 | 2.48E-140 | 14 |
| Cacna1s      | 9.87E-143  | 0.93184499 | 0.345 | 0.014 | 1.62E-138 | 14 |

|              |           |            |       |       |           |    |
|--------------|-----------|------------|-------|-------|-----------|----|
| Trp53inp1    | 6.65E-142 | 1.47674207 | 0.527 | 0.036 | 1.09E-137 | 14 |
| Igkc.3       | 3.80E-140 | 4.04601585 | 0.936 | 0.163 | 6.25E-136 | 14 |
| Iglc2.3      | 9.01E-140 | 2.15050544 | 0.9   | 0.12  | 1.48E-135 | 14 |
| Fam46c       | 4.13E-119 | 1.25492575 | 0.527 | 0.043 | 6.79E-115 | 14 |
| Fam214a      | 1.48E-116 | 1.1456887  | 0.464 | 0.033 | 2.43E-112 | 14 |
| Ckap4        | 5.87E-109 | 1.18162186 | 0.482 | 0.039 | 9.66E-105 | 14 |
| Pdia4.2      | 3.35E-100 | 1.81247758 | 0.827 | 0.138 | 5.51E-96  | 14 |
| Edem2        | 2.15E-92  | 1.13129325 | 0.527 | 0.054 | 3.54E-88  | 14 |
| Xbp1.1       | 4.58E-91  | 1.72939622 | 0.845 | 0.163 | 7.54E-87  | 14 |
| Ighm.11      | 3.29E-87  | 4.01906117 | 0.991 | 0.406 | 5.41E-83  | 14 |
| Pou2af1      | 4.71E-75  | 0.89732361 | 0.418 | 0.041 | 7.74E-71  | 14 |
| Edem1        | 2.65E-74  | 1.23982119 | 0.6   | 0.088 | 4.36E-70  | 14 |
| Txndc11      | 1.02E-69  | 0.89482275 | 0.418 | 0.045 | 1.68E-65  | 14 |
| Sdc1         | 2.04E-64  | 0.72305056 | 0.291 | 0.024 | 3.35E-60  | 14 |
| AC133103.1.1 | 1.16E-63  | 0.68401899 | 0.382 | 0.039 | 1.90E-59  | 14 |
| Isg20        | 2.44E-61  | 0.71264984 | 0.327 | 0.031 | 4.02E-57  | 14 |
| Iglc3.3      | 1.76E-59  | 1.13392676 | 0.627 | 0.109 | 2.89E-55  | 14 |
| Phgdh        | 4.06E-57  | 0.8269571  | 0.364 | 0.041 | 6.68E-53  | 14 |
| Tmsb4x.9     | 5.09E-53  | -1.5349092 | 0.836 | 0.995 | 8.38E-49  | 14 |
| Spcs2.2      | 2.50E-51  | 1.10328551 | 0.764 | 0.194 | 4.11E-47  | 14 |
| Herpud1.2    | 9.36E-50  | 1.23045412 | 0.718 | 0.179 | 1.54E-45  | 14 |
| Sec11c.3     | 2.39E-47  | 1.34970404 | 0.791 | 0.255 | 3.93E-43  | 14 |
| Hsp90b1.4    | 1.92E-46  | 1.74162395 | 0.927 | 0.469 | 3.16E-42  | 14 |
| Hyou1        | 3.48E-46  | 0.75811779 | 0.382 | 0.054 | 5.73E-42  | 14 |
| Manf         | 1.11E-44  | 1.3477835  | 0.7   | 0.197 | 1.83E-40  | 14 |
| Ly6a.5       | 1.78E-44  | 1.0274462  | 0.691 | 0.168 | 2.92E-40  | 14 |
| Actb.8       | 7.59E-42  | -1.002322  | 0.955 | 0.994 | 1.25E-37  | 14 |
| Fkbp2.3      | 1.69E-41  | 0.8218847  | 0.7   | 0.172 | 2.78E-37  | 14 |
| Lman1        | 2.02E-41  | 0.69496698 | 0.409 | 0.066 | 3.32E-37  | 14 |
| Sdf2l1.3     | 1.42E-40  | 1.0916994  | 0.627 | 0.157 | 2.33E-36  | 14 |
| Rgcc.2       | 9.93E-40  | 0.7299136  | 0.418 | 0.071 | 1.63E-35  | 14 |
| Tmem154      | 1.96E-37  | 0.568464   | 0.282 | 0.036 | 3.22E-33  | 14 |
| Fth1.11      | 5.16E-36  | -1.3288395 | 0.882 | 0.959 | 8.48E-32  | 14 |
| Fau.4        | 1.12E-35  | -0.8453199 | 0.945 | 0.992 | 1.84E-31  | 14 |
| Spcs1        | 5.39E-35  | 1.00515716 | 0.709 | 0.226 | 8.87E-31  | 14 |
| Prdx4        | 1.69E-33  | 0.75548376 | 0.382 | 0.071 | 2.79E-29  | 14 |
| H13.4        | 1.73E-33  | 0.94800164 | 0.636 | 0.176 | 2.85E-29  | 14 |
| Rps9.4       | 2.78E-32  | -0.881282  | 0.882 | 0.964 | 4.56E-28  | 14 |
| Tpt1.2       | 2.96E-32  | -0.7510211 | 0.945 | 0.983 | 4.87E-28  | 14 |
| Hdlbp        | 4.39E-32  | 0.71868559 | 0.527 | 0.127 | 7.22E-28  | 14 |
| Serp1.7      | 6.28E-30  | 0.88947237 | 0.845 | 0.369 | 1.03E-25  | 14 |
| Rexo2.2      | 1.65E-29  | 0.86711631 | 0.582 | 0.166 | 2.72E-25  | 14 |
| Ssr4.4       | 1.90E-29  | 1.16911131 | 0.782 | 0.364 | 3.13E-25  | 14 |

|            |          |            |       |       |          |    |
|------------|----------|------------|-------|-------|----------|----|
| Ctla4.2    | 3.11E-29 | 0.72505663 | 0.318 | 0.056 | 5.12E-25 | 14 |
| Ergic1     | 4.93E-29 | 0.56664964 | 0.3   | 0.051 | 8.11E-25 | 14 |
| Selenos    | 7.80E-29 | 0.80193127 | 0.527 | 0.14  | 1.28E-24 | 14 |
| Spcs3      | 8.59E-29 | 0.5778281  | 0.391 | 0.08  | 1.41E-24 | 14 |
| Junb.10    | 1.15E-28 | -1.4015368 | 0.527 | 0.847 | 1.89E-24 | 14 |
| Sel1l      | 1.53E-28 | 0.74812199 | 0.373 | 0.077 | 2.52E-24 | 14 |
| Rps29.3    | 2.73E-27 | -0.9749642 | 0.736 | 0.896 | 4.49E-23 | 14 |
| Rplp1.3    | 4.27E-27 | -0.7519356 | 0.9   | 0.974 | 7.03E-23 | 14 |
| Actg1.8    | 1.82E-26 | -1.0805402 | 0.655 | 0.905 | 2.99E-22 | 14 |
| Rpl37a.2   | 5.26E-26 | -0.8359055 | 0.855 | 0.941 | 8.66E-22 | 14 |
| Trabd      | 2.55E-25 | 0.53534654 | 0.291 | 0.054 | 4.20E-21 | 14 |
| Rps11.7    | 1.45E-24 | -0.7159637 | 0.9   | 0.967 | 2.38E-20 | 14 |
| Pfn1.5     | 1.88E-24 | -1.0260406 | 0.755 | 0.861 | 3.10E-20 | 14 |
| Pafah1b3.1 | 9.28E-24 | 0.71755495 | 0.336 | 0.074 | 1.53E-19 | 14 |
| mt-Co1.3   | 1.11E-23 | -0.574043  | 0.955 | 0.989 | 1.82E-19 | 14 |
| Rps16.5    | 1.79E-23 | -0.7037147 | 0.918 | 0.975 | 2.94E-19 | 14 |
| Tyropb.12  | 1.95E-23 | -2.0968751 | 0.145 | 0.614 | 3.20E-19 | 14 |
| Krtcap2.3  | 2.12E-23 | 0.83322265 | 0.709 | 0.29  | 3.49E-19 | 14 |
| Rpn1       | 4.28E-23 | 0.76251177 | 0.518 | 0.156 | 7.03E-19 | 14 |
| Trp53i11   | 4.52E-23 | 0.3895878  | 0.264 | 0.048 | 7.44E-19 | 14 |
| Ddost      | 1.25E-22 | 0.68133987 | 0.6   | 0.201 | 2.05E-18 | 14 |
| Sec61a1    | 1.49E-22 | 0.54618273 | 0.418 | 0.106 | 2.45E-18 | 14 |
| Rps12.4    | 1.77E-22 | -0.743748  | 0.827 | 0.939 | 2.91E-18 | 14 |
| Tmem248    | 4.00E-22 | 0.45399002 | 0.336 | 0.075 | 6.59E-18 | 14 |
| Ift20      | 6.01E-22 | 0.54485604 | 0.391 | 0.097 | 9.89E-18 | 14 |
| Rpl30.6    | 9.28E-22 | -0.7022304 | 0.891 | 0.954 | 1.53E-17 | 14 |
| Rpl23.3    | 9.38E-22 | -0.6092365 | 0.955 | 0.975 | 1.54E-17 | 14 |
| Sh3bgrl3.8 | 6.35E-21 | -1.1132195 | 0.5   | 0.751 | 1.04E-16 | 14 |
| Fcer1g.11  | 1.84E-20 | -1.9404254 | 0.155 | 0.583 | 3.03E-16 | 14 |
| Rps23.3    | 2.11E-20 | -0.7524035 | 0.827 | 0.897 | 3.46E-16 | 14 |
| Gpx1.13    | 4.58E-20 | -1.5638088 | 0.482 | 0.715 | 7.53E-16 | 14 |
| Pdia6.1    | 5.94E-20 | 0.87148483 | 0.564 | 0.199 | 9.78E-16 | 14 |
| Rpl27a.7   | 9.57E-20 | -0.7824032 | 0.782 | 0.89  | 1.57E-15 | 14 |
| Cfl1.3     | 1.83E-19 | -0.9477822 | 0.673 | 0.79  | 3.01E-15 | 14 |
| H2-Aa.3    | 2.16E-37 | -0.662391  | 0.666 | 0.75  | 3.56E-33 | 3  |
| Rps5.7     | 2.41E-18 | -0.6321996 | 0.927 | 0.963 | 3.97E-14 | 14 |
| Rps27.10   | 3.17E-18 | -0.7909237 | 0.782 | 0.904 | 5.22E-14 | 14 |
| Lyz2.13    | 4.39E-18 | -2.4846734 | 0.164 | 0.56  | 7.22E-14 | 14 |
| Dnajb11    | 4.67E-18 | 0.70877097 | 0.373 | 0.108 | 7.68E-14 | 14 |
| Rpl39.8    | 7.94E-18 | -0.7324631 | 0.845 | 0.89  | 1.31E-13 | 14 |
| Rps19.8    | 8.51E-18 | -0.7019741 | 0.9   | 0.934 | 1.40E-13 | 14 |
| Dusp1.9    | 1.01E-17 | -1.7395662 | 0.273 | 0.61  | 1.66E-13 | 14 |
| Rpl13.7    | 1.71E-17 | -0.5752095 | 0.982 | 0.981 | 2.81E-13 | 14 |

|           |          |            |       |       |           |    |
|-----------|----------|------------|-------|-------|-----------|----|
| Ube2j1    | 1.72E-17 | 0.46285684 | 0.318 | 0.081 | 2.84E-13  | 14 |
| Tmed2.1   | 2.08E-17 | 0.54907084 | 0.645 | 0.253 | 3.42E-13  | 14 |
| Crip1.12  | 3.30E-17 | -1.4032741 | 0.464 | 0.724 | 5.43E-13  | 14 |
| Rps4x.7   | 3.46E-17 | -0.5385549 | 0.927 | 0.964 | 5.69E-13  | 14 |
| Rps15a.9  | 4.29E-17 | -0.6602175 | 0.909 | 0.951 | 7.06E-13  | 14 |
| Rpl32.7   | 4.69E-17 | -0.6081928 | 0.909 | 0.95  | 7.71E-13  | 14 |
| Rps21.5   | 5.86E-17 | -0.7006093 | 0.855 | 0.883 | 9.64E-13  | 14 |
| Igkv12-44 | 8.08E-17 | 5.64520048 | 0.309 | 0.092 | 1.33E-12  | 14 |
| Mrpl57.1  | 1.05E-16 | 0.48167141 | 0.418 | 0.128 | 1.73E-12  | 14 |
| Ppia.6    | 1.24E-16 | -0.6274381 | 0.827 | 0.889 | 2.03E-12  | 14 |
| Spint2    | 1.41E-16 | 0.44768104 | 0.309 | 0.08  | 2.32E-12  | 14 |
| Dnajc3.1  | 1.51E-16 | 0.64366057 | 0.591 | 0.231 | 2.49E-12  | 14 |
| Eef1a1.9  | 1.82E-16 | -0.5306842 | 0.964 | 0.98  | 2.99E-12  | 14 |
| Clptm1l   | 2.14E-16 | 0.4652908  | 0.336 | 0.093 | 3.52E-12  | 14 |
| Rps13.7   | 2.35E-16 | -0.7624302 | 0.664 | 0.834 | 3.86E-12  | 14 |
| Slamf7.2  | 3.04E-16 | 0.51902952 | 0.4   | 0.124 | 5.01E-12  | 14 |
| Kdelr1    | 3.15E-16 | 0.50225347 | 0.382 | 0.113 | 5.19E-12  | 14 |
| Ifitm3.12 | 4.05E-16 | -1.9000194 | 0.109 | 0.496 | 6.66E-12  | 14 |
| Rpl7.5    | 5.31E-16 | -0.7100514 | 0.745 | 0.843 | 8.74E-12  | 14 |
| Chchd10   | 5.36E-16 | 0.36148462 | 0.273 | 0.066 | 8.81E-12  | 14 |
| Slc39a7   | 7.89E-16 | 0.35336842 | 0.264 | 0.063 | 1.30E-11  | 14 |
| Btg2.8    | 1.16E-15 | -1.1581425 | 0.445 | 0.674 | 1.90E-11  | 14 |
| mt-Co3.5  | 1.44E-15 | -0.4742647 | 0.964 | 0.975 | 2.37E-11  | 14 |
| Fcrla.1   | 2.08E-15 | 0.31611944 | 0.282 | 0.071 | 3.41E-11  | 14 |
| H2-Ab1.2  | 7.62E-37 | -0.6806172 | 0.562 | 0.723 | 1.25E-32  | 3  |
| Rpl34.6   | 2.25E-15 | -0.5347833 | 0.927 | 0.947 | 3.70E-11  | 14 |
| Cnpy2     | 2.26E-15 | 0.36782257 | 0.327 | 0.09  | 3.72E-11  | 14 |
| Slc35b1   | 3.29E-15 | 0.4073724  | 0.273 | 0.069 | 5.41E-11  | 14 |
| Preb      | 3.54E-15 | 0.45748762 | 0.3   | 0.08  | 5.83E-11  | 14 |
| Rps14.3   | 3.87E-15 | -0.5476211 | 0.909 | 0.93  | 6.37E-11  | 14 |
| Tram1     | 3.98E-15 | 0.46713536 | 0.4   | 0.128 | 6.55E-11  | 14 |
| Tmed10.5  | 4.16E-15 | 0.64069611 | 0.627 | 0.28  | 6.85E-11  | 14 |
| Erp44     | 4.64E-15 | 0.39607982 | 0.327 | 0.093 | 7.64E-11  | 14 |
| Rps3a1.7  | 5.05E-15 | -0.5004497 | 0.936 | 0.964 | 8.31E-11  | 14 |
| Vim.11    | 8.40E-15 | -1.3289242 | 0.336 | 0.626 | 1.38E-10  | 14 |
| Rpl36.8   | 9.22E-15 | -0.6085108 | 0.809 | 0.901 | 1.52E-10  | 14 |
| Rps10.5   | 9.30E-15 | -0.5277048 | 0.955 | 0.957 | 1.53E-10  | 14 |
| Rpl11.6   | 1.02E-14 | -0.5479343 | 0.873 | 0.927 | 1.67E-10  | 14 |
| Rpl18a.7  | 1.66E-14 | -0.5430734 | 0.945 | 0.962 | 2.72E-10  | 14 |
| Rps7.7    | 2.40E-14 | -0.5952485 | 0.891 | 0.942 | 3.95E-10  | 14 |
| Rpl19.8   | 2.42E-14 | -0.5411473 | 0.964 | 0.955 | 3.97E-10  | 14 |
| H2-K1.11  | 3.94E-06 | -0.6957032 | 0.852 | 0.843 | 0.0647722 | 17 |
| mt-Nd2.6  | 3.48E-14 | -0.7631401 | 0.655 | 0.8   | 5.73E-10  | 14 |



|             |          |            |       |       |          |    |
|-------------|----------|------------|-------|-------|----------|----|
| Derl1       | 4.48E-14 | 0.43641539 | 0.373 | 0.119 | 7.37E-10 | 14 |
| Myl6.6      | 4.68E-14 | -1.0029027 | 0.445 | 0.656 | 7.70E-10 | 14 |
| Ptpn18.5    | 5.90E-14 | -1.0025864 | 0.345 | 0.618 | 9.71E-10 | 14 |
| Rps18.8     | 6.97E-14 | -0.6156572 | 0.855 | 0.87  | 1.15E-09 | 14 |
| Psap.11     | 7.77E-14 | -1.2974571 | 0.545 | 0.678 | 1.28E-09 | 14 |
| Ccl6.13     | 1.15E-13 | -1.9754734 | 0.073 | 0.417 | 1.90E-09 | 14 |
| Uba52.7     | 1.62E-13 | -0.4695026 | 0.955 | 0.975 | 2.67E-09 | 14 |
| Rpl37.5     | 1.82E-13 | -0.5105617 | 0.909 | 0.929 | 2.99E-09 | 14 |
| Laptm5.5    | 1.92E-13 | -0.9488093 | 0.436 | 0.658 | 3.16E-09 | 14 |
| Alox5ap.13  | 2.15E-13 | -1.602974  | 0.064 | 0.402 | 3.54E-09 | 14 |
| Arpc1b.10   | 3.03E-13 | -1.0345866 | 0.409 | 0.626 | 4.98E-09 | 14 |
| mt-Atp8.10  | 3.04E-13 | -0.529144  | 0.918 | 0.929 | 5.00E-09 | 14 |
| mt-Co2.1    | 3.05E-13 | -0.3978945 | 0.973 | 0.972 | 5.02E-09 | 14 |
| Nfkbiz.11   | 3.39E-13 | -1.7889651 | 0.127 | 0.445 | 5.57E-09 | 14 |
| Mtdh        | 4.09E-13 | 0.68007258 | 0.691 | 0.347 | 6.73E-09 | 14 |
| Irf4        | 4.47E-13 | 0.56478495 | 0.282 | 0.082 | 7.36E-09 | 14 |
| Srpr        | 4.93E-13 | 0.48212203 | 0.4   | 0.142 | 8.10E-09 | 14 |
| H3f3a.9     | 5.05E-13 | -0.8458175 | 0.655 | 0.739 | 8.30E-09 | 14 |
| Rplp2.5     | 5.35E-13 | -0.5087043 | 0.9   | 0.92  | 8.80E-09 | 14 |
| Surf4       | 7.05E-13 | 0.46629774 | 0.364 | 0.123 | 1.16E-08 | 14 |
| Arpc2.9     | 7.81E-13 | -0.8926426 | 0.491 | 0.669 | 1.29E-08 | 14 |
| Rpl3.8      | 9.84E-13 | -0.6649016 | 0.764 | 0.839 | 1.62E-08 | 14 |
| Rps27a.5    | 1.03E-12 | -0.4859869 | 0.936 | 0.936 | 1.69E-08 | 14 |
| Slc3a2.1    | 1.47E-12 | 0.57906255 | 0.518 | 0.212 | 2.41E-08 | 14 |
| Ly6d.12     | 1.85E-12 | 0.63367437 | 0.636 | 0.303 | 3.04E-08 | 14 |
| Rpl15.4     | 1.86E-12 | -0.6146814 | 0.782 | 0.849 | 3.06E-08 | 14 |
| P4hb.1      | 2.26E-12 | 0.48454565 | 0.555 | 0.232 | 3.72E-08 | 14 |
| Lman2       | 2.40E-12 | 0.33070906 | 0.436 | 0.155 | 3.95E-08 | 14 |
| Cst3.11     | 2.43E-12 | -1.7483672 | 0.655 | 0.686 | 3.99E-08 | 14 |
| Rpl22.6     | 2.69E-12 | -0.6232949 | 0.745 | 0.828 | 4.43E-08 | 14 |
| Rps28.4     | 4.07E-12 | -0.658945  | 0.727 | 0.799 | 6.69E-08 | 14 |
| Ssr2        | 5.03E-12 | 0.50356519 | 0.318 | 0.104 | 8.27E-08 | 14 |
| Cmah        | 5.12E-12 | 0.3501294  | 0.264 | 0.075 | 8.42E-08 | 14 |
| Rps2.7      | 5.70E-12 | -0.4219061 | 0.945 | 0.944 | 9.38E-08 | 14 |
| Rpl27.6     | 6.84E-12 | -0.5795676 | 0.791 | 0.83  | 1.13E-07 | 14 |
| Marcksl1.11 | 7.02E-12 | -1.7833927 | 0.145 | 0.439 | 1.15E-07 | 14 |
| Csf1r.13    | 7.73E-12 | -1.7919884 | 0.027 | 0.337 | 1.27E-07 | 14 |
| Kdelr2      | 7.87E-12 | 0.42453136 | 0.255 | 0.074 | 1.29E-07 | 14 |
| Rps3.8      | 8.02E-12 | -0.5231649 | 0.873 | 0.914 | 1.32E-07 | 14 |
| Ifitm2.12   | 8.80E-12 | -1.5632436 | 0.091 | 0.395 | 1.45E-07 | 14 |
| Coro1a.6    | 8.86E-12 | -1.0120887 | 0.491 | 0.639 | 1.46E-07 | 14 |
| Rpsa.8      | 1.27E-11 | -0.5723864 | 0.945 | 0.935 | 2.09E-07 | 14 |
| Rap1a.4     | 1.43E-11 | 0.40077353 | 0.609 | 0.27  | 2.34E-07 | 14 |

|             |          |            |       |       |          |    |
|-------------|----------|------------|-------|-------|----------|----|
| Ier2.11     | 1.49E-11 | -1.1504978 | 0.3   | 0.559 | 2.45E-07 | 14 |
| Rps6.8      | 1.52E-11 | -0.685818  | 0.7   | 0.772 | 2.51E-07 | 14 |
| Tspan13.3   | 1.55E-11 | 0.37514547 | 0.427 | 0.161 | 2.54E-07 | 14 |
| Gm10076.4   | 1.86E-11 | -0.4109264 | 0.945 | 0.953 | 3.06E-07 | 14 |
| 1110008P14R | 1.99E-11 | 0.30672389 | 0.318 | 0.103 | 3.27E-07 | 14 |
| Rpl35.5     | 2.04E-11 | -0.4439342 | 0.909 | 0.925 | 3.36E-07 | 14 |
| Sars        | 2.66E-11 | 0.36060124 | 0.264 | 0.08  | 4.38E-07 | 14 |
| Rps26.9     | 2.90E-11 | -0.4794209 | 0.918 | 0.935 | 4.77E-07 | 14 |
| Cd24a.4     | 3.00E-11 | 0.32094507 | 0.373 | 0.133 | 4.93E-07 | 14 |
| Nr4a1.8     | 3.05E-11 | -1.1553655 | 0.209 | 0.51  | 5.01E-07 | 14 |
| Rpl9-ps6.9  | 3.43E-11 | -0.5243509 | 0.936 | 0.906 | 5.65E-07 | 14 |
| Ubxn4       | 3.66E-11 | 0.46557231 | 0.409 | 0.157 | 6.01E-07 | 14 |
| Gnai2.9     | 3.99E-11 | -0.9750571 | 0.264 | 0.532 | 6.56E-07 | 14 |
| Rpl26.5     | 4.68E-11 | -0.4463012 | 0.864 | 0.899 | 7.71E-07 | 14 |
| Mgat1       | 4.74E-11 | 0.36782136 | 0.264 | 0.08  | 7.80E-07 | 14 |
| Tmsb10.11   | 4.94E-11 | -0.9632398 | 0.818 | 0.785 | 8.13E-07 | 14 |
| Rpl36a.8    | 5.68E-11 | -0.6900257 | 0.673 | 0.762 | 9.34E-07 | 14 |
| Clta.10     | 9.81E-11 | -1.0808427 | 0.364 | 0.551 | 1.61E-06 | 14 |
| Tmbim4      | 1.02E-10 | 0.29523864 | 0.4   | 0.148 | 1.67E-06 | 14 |
| Rps8.5      | 1.08E-10 | -0.3156039 | 0.991 | 0.983 | 1.78E-06 | 14 |
| Igkv1-117.3 | 1.10E-10 | 4.37178765 | 0.427 | 0.201 | 1.82E-06 | 14 |
| Morf4l2     | 1.12E-10 | 0.31510919 | 0.3   | 0.099 | 1.84E-06 | 14 |
| Rpl6.6      | 1.16E-10 | -0.4854774 | 0.873 | 0.897 | 1.90E-06 | 14 |
| Rpl12.10    | 1.24E-10 | -0.7223219 | 0.709 | 0.762 | 2.04E-06 | 14 |
| Rpl28.6     | 1.33E-10 | -0.4487246 | 0.864 | 0.914 | 2.19E-06 | 14 |
| Tmed9       | 1.34E-10 | 0.33698116 | 0.491 | 0.203 | 2.20E-06 | 14 |
| Odc1.4      | 1.37E-10 | 0.30613705 | 0.464 | 0.187 | 2.25E-06 | 14 |
| Marcks.11   | 1.45E-10 | -1.2920385 | 0.045 | 0.336 | 2.38E-06 | 14 |
| Cope.1      | 1.48E-10 | 0.45603376 | 0.445 | 0.189 | 2.44E-06 | 14 |
| C1qa.13     | 1.91E-10 | -2.3583529 | 0.055 | 0.334 | 3.15E-06 | 14 |
| Hspa5.2     | 1.99E-10 | 0.79355822 | 0.755 | 0.459 | 3.28E-06 | 14 |
| Ero1lb.1    | 2.33E-10 | 0.38003073 | 0.255 | 0.081 | 3.83E-06 | 14 |
| Ftl1.12     | 2.49E-10 | -1.0087736 | 0.918 | 0.89  | 4.09E-06 | 14 |
| Ssr3        | 3.23E-10 | 0.35220679 | 0.327 | 0.117 | 5.31E-06 | 14 |
| Txnl1       | 3.35E-10 | 0.34624095 | 0.3   | 0.102 | 5.50E-06 | 14 |
| St6gal1     | 6.12E-10 | 0.40561683 | 0.255 | 0.081 | 1.01E-05 | 14 |
| Zfp36.9     | 6.26E-10 | -1.243784  | 0.5   | 0.613 | 1.03E-05 | 14 |
| F13a1.12    | 8.09E-10 | -1.7263407 | 0.018 | 0.283 | 1.33E-05 | 14 |
| Ctsh.10     | 1.19E-09 | -1.1172995 | 0.127 | 0.389 | 1.96E-05 | 14 |
| Btg1.8      | 1.55E-09 | -0.9613049 | 0.373 | 0.576 | 2.55E-05 | 14 |
| mt-Nd1.3    | 1.91E-09 | -0.4614019 | 0.864 | 0.869 | 3.14E-05 | 14 |
| Gorasp2     | 1.94E-09 | 0.2807345  | 0.255 | 0.083 | 3.19E-05 | 14 |
| Rpl10a.6    | 2.06E-09 | -0.4751937 | 0.855 | 0.864 | 3.39E-05 | 14 |

|            |          |            |       |       |            |    |
|------------|----------|------------|-------|-------|------------|----|
| Igkv3-2    | 2.79E-09 | 4.99888644 | 0.273 | 0.105 | 4.59E-05   | 14 |
| Hist1h1c.1 | 3.01E-09 | 0.44031172 | 0.264 | 0.09  | 4.95E-05   | 14 |
| Apoe.12    | 5.74E-09 | -2.2605261 | 0.264 | 0.474 | 9.43E-05   | 14 |
| Sec61b.7   | 5.81E-09 | 0.61042327 | 0.764 | 0.478 | 9.55E-05   | 14 |
| Uchl3.2    | 5.98E-09 | 0.32427734 | 0.255 | 0.087 | 9.83E-05   | 14 |
| Vcp        | 6.52E-09 | 0.34614522 | 0.545 | 0.257 | 0.00010729 | 14 |
| Pltp.13    | 7.69E-09 | -1.4643231 | 0.091 | 0.34  | 0.00012649 | 14 |
| Rpl38.2    | 7.86E-09 | -0.541969  | 0.764 | 0.795 | 0.00012931 | 14 |
| Rpn2       | 8.07E-09 | 0.39357357 | 0.391 | 0.162 | 0.00013281 | 14 |
| Sec61g.3   | 8.92E-09 | 0.39563245 | 0.664 | 0.341 | 0.00014678 | 14 |
| Stk17b.7   | 9.02E-09 | -1.0955013 | 0.209 | 0.44  | 0.0001484  | 14 |
| Lcp1.4     | 9.95E-09 | -0.8749442 | 0.336 | 0.537 | 0.00016374 | 14 |
| Pf4.14     | 1.10E-08 | -2.3839375 | 0.073 | 0.31  | 0.00018132 | 14 |
| Rps20.8    | 1.10E-08 | -0.3552513 | 0.973 | 0.972 | 0.00018143 | 14 |
| Wfdc17.11  | 1.38E-08 | -1.3456958 | 0.082 | 0.333 | 0.00022618 | 14 |
| Klf4.10    | 1.67E-08 | -1.5422046 | 0.145 | 0.378 | 0.00027442 | 14 |
| Rpl35a.4   | 1.74E-08 | -0.6096531 | 0.682 | 0.712 | 0.00028657 | 14 |
| Cd14.13    | 1.96E-08 | -1.4143596 | 0.027 | 0.264 | 0.00032244 | 14 |
| Ccl2.13    | 1.98E-08 | -1.9377931 | 0.045 | 0.284 | 0.00032502 | 14 |
| C1qb.13    | 2.05E-08 | -2.0587807 | 0.127 | 0.356 | 0.00033692 | 14 |
| Tpm3.3     | 2.05E-08 | -0.8882655 | 0.309 | 0.497 | 0.0003371  | 14 |
| Mdh1.3     | 2.44E-08 | 0.35678562 | 0.455 | 0.21  | 0.00040124 | 14 |
| C1qc.13    | 2.44E-08 | -2.1074198 | 0.109 | 0.337 | 0.00040204 | 14 |
| mt-Atp6.2  | 2.98E-08 | -0.5166482 | 0.745 | 0.797 | 0.00049033 | 14 |
| Tagln2.10  | 3.13E-08 | -0.9875197 | 0.3   | 0.492 | 0.0005147  | 14 |
| S100a6.11  | 3.90E-08 | -0.710783  | 0.755 | 0.752 | 0.0006423  | 14 |
| Arf4       | 4.11E-08 | 0.32530583 | 0.482 | 0.219 | 0.00067566 | 14 |
| Ptma.4     | 4.16E-08 | -0.5461544 | 0.745 | 0.784 | 0.00068379 | 14 |
| Nucb1      | 4.24E-08 | 0.32083802 | 0.327 | 0.132 | 0.00069757 | 14 |
| Cox4i1.1   | 4.72E-08 | -0.5365255 | 0.627 | 0.7   | 0.00077663 | 14 |
| Serf2.9    | 4.88E-08 | -0.495048  | 0.764 | 0.762 | 0.00080306 | 14 |
| Zeb2.12    | 5.54E-08 | -1.1261108 | 0.073 | 0.299 | 0.00091082 | 14 |
| Calr.2     | 7.13E-08 | 0.51681456 | 0.591 | 0.332 | 0.00117288 | 14 |
| Srp9.1     | 7.97E-08 | 0.29954634 | 0.591 | 0.3   | 0.00131132 | 14 |
| Ddx5.5     | 8.08E-08 | -0.6315658 | 0.664 | 0.703 | 0.00132861 | 14 |
| Cox8a.3    | 8.28E-08 | -0.5848713 | 0.627 | 0.69  | 0.0013616  | 14 |
| mt-Nd4.6   | 8.67E-08 | -0.6160101 | 0.609 | 0.704 | 0.00142575 | 14 |
| Ctsc.11    | 9.24E-08 | -1.3314758 | 0.236 | 0.417 | 0.00151968 | 14 |
| Mrc1.13    | 9.39E-08 | -1.4955076 | 0.091 | 0.309 | 0.00154532 | 14 |
| H2-K1.5    | 4.23E-37 | -0.7213667 | 0.687 | 0.851 | 6.95E-33   | 8  |
| H2-Q7.4    | 2.74E-13 | -0.7277447 | 0.117 | 0.263 | 4.51E-09   | 5  |
| Rpl13a.10  | 1.22E-07 | -0.5259427 | 0.873 | 0.812 | 0.00200749 | 14 |
| Dnajc7.2   | 1.23E-07 | 0.35615766 | 0.345 | 0.149 | 0.00203036 | 14 |

|             |          |            |       |       |            |    |
|-------------|----------|------------|-------|-------|------------|----|
| H2afz.13    | 1.24E-07 | -0.8276719 | 0.464 | 0.59  | 0.0020446  | 14 |
| mt-Nd4l.7   | 1.31E-07 | -0.3790181 | 0.9   | 0.901 | 0.00216284 | 14 |
| Lgals3.13   | 1.52E-07 | -1.155481  | 0.136 | 0.353 | 0.0025028  | 14 |
| H3f3b.5     | 1.55E-07 | -0.4896226 | 0.909 | 0.901 | 0.00254339 | 14 |
| Rps15.3     | 1.86E-07 | -0.5623144 | 0.636 | 0.674 | 0.00306434 | 14 |
| Atf3.10     | 2.00E-07 | -1.2269769 | 0.355 | 0.509 | 0.00328544 | 14 |
| Ifngr1.9    | 2.39E-07 | -1.0548815 | 0.182 | 0.385 | 0.00393204 | 14 |
| Actr3.4     | 2.51E-07 | -0.7438892 | 0.382 | 0.527 | 0.00413588 | 14 |
| H2-DMa.10   | 5.93E-05 | -0.7385786 | 0.238 | 0.428 | 0.97566259 | 16 |
| Tmem258.1   | 2.97E-07 | 0.37179639 | 0.482 | 0.25  | 0.0048841  | 14 |
| H1f0        | 3.06E-07 | 0.38631718 | 0.255 | 0.1   | 0.0050269  | 14 |
| Cd74.10     | 3.47E-07 | -0.7307519 | 0.982 | 0.825 | 0.00570468 | 14 |
| Clic1.5     | 3.60E-07 | -0.7760611 | 0.345 | 0.506 | 0.00591872 | 14 |
| Fcgrt.12    | 3.70E-07 | -1.22475   | 0.055 | 0.26  | 0.00608845 | 14 |
| Oaz1.4      | 3.76E-07 | -0.4305805 | 0.8   | 0.775 | 0.00619039 | 14 |
| Ly86.8      | 4.95E-07 | -0.9522692 | 0.118 | 0.321 | 0.00814357 | 14 |
| Cdc42.3     | 5.00E-07 | -0.7112994 | 0.445 | 0.539 | 0.00821712 | 14 |
| Ahnak.9     | 5.12E-07 | -0.8452028 | 0.4   | 0.549 | 0.00842669 | 14 |
| Arpc3.3     | 5.28E-07 | -0.7176632 | 0.355 | 0.528 | 0.00868687 | 14 |
| Arhgdib.7   | 5.51E-07 | -0.7214077 | 0.5   | 0.597 | 0.00905961 | 14 |
| Ier3.10     | 6.15E-07 | -1.3940424 | 0.127 | 0.328 | 0.01011643 | 14 |
| Cotl1.6     | 6.73E-07 | -0.8883073 | 0.164 | 0.365 | 0.01106926 | 14 |
| Klf2.11     | 6.74E-07 | -0.9536401 | 0.473 | 0.596 | 0.01108965 | 14 |
| Selenop.13  | 7.67E-07 | -1.9274727 | 0.255 | 0.418 | 0.01261397 | 14 |
| Rpl21.7     | 7.71E-07 | -0.5443518 | 0.609 | 0.678 | 0.0126775  | 14 |
| Kdm6b.10    | 8.44E-07 | -0.994801  | 0.118 | 0.315 | 0.01389087 | 14 |
| Naca.6      | 9.11E-07 | -0.5715764 | 0.591 | 0.659 | 0.01498545 | 14 |
| Cxcl2.12    | 9.50E-07 | -1.9453862 | 0.055 | 0.253 | 0.01562097 | 14 |
| Capzb.5     | 9.54E-07 | -0.7705794 | 0.309 | 0.476 | 0.01568999 | 14 |
| Rpl18.6     | 9.76E-07 | -0.346253  | 0.955 | 0.923 | 0.01604921 | 14 |
| Mafb.12     | 1.01E-06 | -1.5559433 | 0.073 | 0.266 | 0.01655058 | 14 |
| Bri3.11     | 1.03E-06 | -0.8987321 | 0.182 | 0.374 | 0.01687451 | 14 |
| Hspa8.3     | 1.10E-06 | -0.5268687 | 0.691 | 0.726 | 0.01812296 | 14 |
| Cfp.12      | 1.28E-06 | -1.0619548 | 0.118 | 0.314 | 0.02102172 | 14 |
| Gm42418.3   | 1.47E-06 | -0.3308924 | 0.991 | 1     | 0.02415013 | 14 |
| Hsp90ab1.2  | 1.57E-06 | -0.4281865 | 0.791 | 0.806 | 0.02575652 | 14 |
| Cyba.5      | 1.67E-06 | -0.5374239 | 0.727 | 0.717 | 0.02748947 | 14 |
| Spi1.10     | 2.13E-06 | -0.9174424 | 0.118 | 0.308 | 0.03498083 | 14 |
| Rpl23a.3    | 2.15E-06 | -0.5639159 | 0.582 | 0.638 | 0.03541766 | 14 |
| Cd68.10     | 2.28E-06 | -1.0460545 | 0.091 | 0.275 | 0.03755496 | 14 |
| Rps25.1     | 2.38E-06 | -0.489253  | 0.609 | 0.672 | 0.03916835 | 14 |
| Rpl10-ps3.4 | 2.48E-06 | -0.2825151 | 0.891 | 0.893 | 0.04085978 | 14 |
| Rack1.5     | 2.63E-06 | -0.4396938 | 0.791 | 0.768 | 0.04329212 | 14 |

|             |          |            |       |       |            |    |
|-------------|----------|------------|-------|-------|------------|----|
| Rpl36al.3   | 2.77E-06 | 0.32181852 | 0.836 | 0.608 | 0.04556126 | 14 |
| Ostc        | 3.04E-06 | 0.36276309 | 0.364 | 0.177 | 0.04995292 | 14 |
| Pld4.9      | 3.74E-06 | -0.8647772 | 0.145 | 0.328 | 0.06146209 | 14 |
| Ifi27l2a.12 | 3.82E-06 | -1.228571  | 0.236 | 0.405 | 0.06284735 | 14 |
| Nrros.12    | 4.74E-06 | -0.8477786 | 0.1   | 0.287 | 0.07791331 | 14 |
| Sat1.10     | 4.96E-06 | -0.9251863 | 0.164 | 0.342 | 0.08152032 | 14 |
| Fam49b.6    | 5.24E-06 | -0.8645662 | 0.127 | 0.302 | 0.08624749 | 14 |
| Rpl8.8      | 5.84E-06 | -0.3572205 | 0.955 | 0.916 | 0.09604974 | 14 |
| Npm1.7      | 6.59E-06 | -0.6634902 | 0.4   | 0.532 | 0.10846069 | 14 |
| Rps24.8     | 7.35E-06 | -0.2513094 | 0.973 | 0.988 | 0.12096345 | 14 |
| Capza2.6    | 8.04E-06 | -0.7965135 | 0.082 | 0.26  | 0.13221043 | 14 |
| Atp2b1.8    | 8.74E-06 | -0.9259828 | 0.191 | 0.349 | 0.14374294 | 14 |
| Atp5g1.2    | 8.78E-06 | 0.35250047 | 0.409 | 0.218 | 0.1444942  | 14 |
| Rpl24.4     | 8.93E-06 | -0.3390768 | 0.855 | 0.851 | 0.14683276 | 14 |
| Fus.1       | 8.96E-06 | -0.8625033 | 0.145 | 0.313 | 0.14735672 | 14 |
| App.9       | 9.60E-06 | -0.8973894 | 0.1   | 0.276 | 0.15786767 | 14 |
| Arpc5.3     | 9.84E-06 | -0.8484606 | 0.236 | 0.381 | 0.16189533 | 14 |
| Rac1.5      | 9.89E-06 | -0.7469495 | 0.291 | 0.436 | 0.16271401 | 14 |
| Mcl1.11     | 1.05E-05 | -0.8866715 | 0.291 | 0.429 | 0.17213197 | 14 |
| Anxa2.13    | 1.08E-05 | -0.9922443 | 0.109 | 0.277 | 0.17815974 | 14 |
| Flna.10     | 1.10E-05 | -0.8790461 | 0.127 | 0.301 | 0.18041979 | 14 |
| Rpl14.10    | 1.17E-05 | -0.3906078 | 0.827 | 0.786 | 0.19324577 | 14 |
| Zfp36l2.5   | 1.21E-05 | -0.8782669 | 0.218 | 0.382 | 0.19897186 | 14 |
| Ppib.1      | 1.21E-05 | 0.33856514 | 0.655 | 0.408 | 0.19943623 | 14 |
| Socs3.12    | 1.45E-05 | -1.0133328 | 0.118 | 0.281 | 0.23836922 | 14 |
| Anxa5.9     | 1.54E-05 | -0.8522487 | 0.182 | 0.345 | 0.25296043 | 14 |
| Kctd12.11   | 1.58E-05 | -0.9402785 | 0.218 | 0.373 | 0.26070029 | 14 |
| Sem1.7      | 1.75E-05 | -0.6927188 | 0.5   | 0.55  | 0.28779391 | 14 |
| Myh9.7      | 1.77E-05 | -0.6761262 | 0.373 | 0.504 | 0.29120711 | 14 |
| Rpl9.3      | 1.85E-05 | -0.5186231 | 0.573 | 0.63  | 0.30448143 | 14 |
| Vamp8.9     | 1.93E-05 | -0.7810339 | 0.182 | 0.344 | 0.31702614 | 14 |
| Eno1.6      | 2.08E-05 | -0.7308323 | 0.264 | 0.414 | 0.34146859 | 14 |
| Efhd2.11    | 2.49E-05 | -0.825514  | 0.136 | 0.298 | 0.40977046 | 14 |
| Atox1.13    | 2.80E-05 | -0.8543627 | 0.364 | 0.457 | 0.46081911 | 14 |
| Ptprc.5     | 3.10E-05 | -0.7732459 | 0.309 | 0.442 | 0.50977223 | 14 |
| Lamp1.12    | 3.46E-05 | -0.8296937 | 0.282 | 0.416 | 0.5696019  | 14 |
| Slc25a3.1   | 3.67E-05 | -0.6036316 | 0.409 | 0.495 | 0.60429262 | 14 |
| Rrbp1.10    | 3.81E-05 | 0.3425327  | 0.591 | 0.345 | 0.62654328 | 14 |
| Eif1.1      | 3.82E-05 | -0.2939617 | 0.918 | 0.872 | 0.62792519 | 14 |
| Cebpb.13    | 4.89E-05 | -0.9612636 | 0.182 | 0.331 | 0.80462337 | 14 |
| Pfdn5.2     | 6.65E-05 | -0.539312  | 0.582 | 0.605 | 1          | 14 |
| Sdcbp.8     | 7.74E-05 | -0.8333953 | 0.136 | 0.277 | 1          | 14 |
| Hexa.10     | 8.21E-05 | -0.9327569 | 0.155 | 0.294 | 1          | 14 |

|             |            |            |       |       |   |    |
|-------------|------------|------------|-------|-------|---|----|
| Sqstm1.5    | 8.81E-05   | 0.41637716 | 0.627 | 0.378 | 1 | 14 |
| Tln1.4      | 9.35E-05   | -0.6564268 | 0.309 | 0.429 | 1 | 14 |
| Rpl5.6      | 9.73E-05   | -0.4257037 | 0.745 | 0.716 | 1 | 14 |
| Emp3.8      | 0.00010753 | -0.7870006 | 0.345 | 0.435 | 1 | 14 |
| Fos.9       | 0.00010949 | -0.8069843 | 0.545 | 0.622 | 1 | 14 |
| Mt1.13      | 0.000119   | -1.0312381 | 0.282 | 0.418 | 1 | 14 |
| Rpl10.3     | 0.00012036 | -0.459947  | 0.673 | 0.677 | 1 | 14 |
| Ctsb.13     | 0.00012371 | -1.1453479 | 0.4   | 0.477 | 1 | 14 |
| Rpl29.6     | 0.00013488 | -0.2700841 | 0.882 | 0.857 | 1 | 14 |
| Pde4b.9     | 0.00013577 | -0.7754818 | 0.309 | 0.419 | 1 | 14 |
| Atp5e.6     | 0.00015024 | -0.4895097 | 0.582 | 0.623 | 1 | 14 |
| Hnrnpa2b1.3 | 0.00015097 | -0.5503781 | 0.5   | 0.554 | 1 | 14 |
| Npc2.10     | 0.00015419 | -0.7251551 | 0.482 | 0.513 | 1 | 14 |
| Gadd45b.11  | 0.00015908 | -0.9356789 | 0.118 | 0.253 | 1 | 14 |
| mt-Nd5.7    | 0.00017013 | -0.4828869 | 0.682 | 0.659 | 1 | 14 |
| Rbms1.7     | 0.00017855 | -0.8075291 | 0.127 | 0.259 | 1 | 14 |
| Brk1        | 0.0001944  | -0.708516  | 0.127 | 0.264 | 1 | 14 |
| Ost4        | 0.00021421 | 0.25653949 | 0.573 | 0.35  | 1 | 14 |
| Iqgap1.4    | 0.00024283 | -0.5396701 | 0.309 | 0.443 | 1 | 14 |
| Egr1.11     | 0.00024437 | -1.2938887 | 0.4   | 0.459 | 1 | 14 |
| Ctsa.11     | 0.00025362 | -0.8488129 | 0.164 | 0.286 | 1 | 14 |
| Rap1b.8     | 0.00026421 | -0.6689353 | 0.309 | 0.416 | 1 | 14 |
| Litaf.5     | 0.00027688 | -0.7668182 | 0.136 | 0.265 | 1 | 14 |
| Uqcrh.2     | 0.00028594 | -0.5345646 | 0.536 | 0.562 | 1 | 14 |
| Lgmn.13     | 0.00032038 | -0.9713444 | 0.155 | 0.281 | 1 | 14 |
| Grn.10      | 0.00034122 | -0.9746632 | 0.282 | 0.378 | 1 | 14 |
| Pabpc1.4    | 0.00035168 | -0.425021  | 0.618 | 0.634 | 1 | 14 |
| Cnn2.5      | 0.00038558 | -0.720201  | 0.227 | 0.349 | 1 | 14 |
| Ucp2.7      | 0.00041433 | -0.5423942 | 0.6   | 0.598 | 1 | 14 |
| Ccnl1.10    | 0.0004215  | -0.7586025 | 0.191 | 0.308 | 1 | 14 |
| Dbi.9       | 0.00044001 | -0.6759492 | 0.164 | 0.294 | 1 | 14 |
| Chd4.1      | 0.00045457 | -0.6324929 | 0.136 | 0.271 | 1 | 14 |
| Arf5.7      | 0.00045935 | -0.6804418 | 0.336 | 0.413 | 1 | 14 |
| Hsp90aa1.1  | 0.00047687 | -0.7372995 | 0.236 | 0.344 | 1 | 14 |
| Gltp.9      | 0.00047888 | -0.6912012 | 0.136 | 0.26  | 1 | 14 |
| Fyb.9       | 0.00048665 | -0.7666195 | 0.127 | 0.252 | 1 | 14 |
| Glud1.4     | 0.00054355 | -0.5720094 | 0.136 | 0.27  | 1 | 14 |
| Gmfg.1      | 0.00055156 | -0.747562  | 0.245 | 0.344 | 1 | 14 |
| Ndufa6.3    | 0.00057243 | -0.6266156 | 0.318 | 0.41  | 1 | 14 |
| Lsp1.11     | 0.00060768 | -0.8618566 | 0.318 | 0.397 | 1 | 14 |
| Rhog.3      | 0.00061303 | -0.7398904 | 0.182 | 0.293 | 1 | 14 |
| Plek.7      | 0.0006378  | -0.7655293 | 0.245 | 0.348 | 1 | 14 |
| Sub1.8      | 0.00066463 | 0.32994545 | 0.636 | 0.461 | 1 | 14 |

|             |            |            |       |       |   |    |
|-------------|------------|------------|-------|-------|---|----|
| Itgb2.9     | 0.00066776 | -0.770765  | 0.155 | 0.269 | 1 | 14 |
| Ctsd.12     | 0.00071915 | -0.8034047 | 0.173 | 0.292 | 1 | 14 |
| Rpl22l1.6   | 0.0007283  | -0.5878429 | 0.355 | 0.444 | 1 | 14 |
| Snx3.6      | 0.00073259 | -0.693174  | 0.255 | 0.352 | 1 | 14 |
| Msn.5       | 0.00073491 | -0.6250758 | 0.345 | 0.436 | 1 | 14 |
| Pnrc1.6     | 0.00080017 | -0.5740889 | 0.473 | 0.517 | 1 | 14 |
| Jund.10     | 0.00081615 | -0.601936  | 0.673 | 0.683 | 1 | 14 |
| Prdx5.9     | 0.00081618 | -0.7106734 | 0.227 | 0.337 | 1 | 14 |
| Tgfb1.4     | 0.00082011 | -0.6818706 | 0.218 | 0.33  | 1 | 14 |
| Fxyd5.13    | 0.00084901 | -0.6690379 | 0.409 | 0.466 | 1 | 14 |
| Srgn.5      | 0.00088049 | -0.4631416 | 0.718 | 0.672 | 1 | 14 |
| Chchd2      | 0.00093193 | -0.4311882 | 0.636 | 0.625 | 1 | 14 |
| Cltc.11     | 0.00093551 | -0.7818018 | 0.236 | 0.333 | 1 | 14 |
| Rpl41.2     | 0.0009463  | -0.3282926 | 0.782 | 0.745 | 1 | 14 |
| Rpl4.7      | 0.00096506 | -0.4370456 | 0.673 | 0.644 | 1 | 14 |
| Rel.10      | 0.00098313 | -0.78715   | 0.173 | 0.282 | 1 | 14 |
| Tmem176b.10 | 0.00105777 | -0.8141099 | 0.382 | 0.44  | 1 | 14 |
| Tspo.7      | 0.0010611  | -0.6645612 | 0.364 | 0.424 | 1 | 14 |
| Malat1.7    | 0.00106203 | 0.28246411 | 0.927 | 0.936 | 1 | 14 |
| Rgs10.10    | 0.00106881 | -0.7827504 | 0.173 | 0.277 | 1 | 14 |
| Gm8186.3    | 0.00116298 | -0.6626895 | 0.145 | 0.259 | 1 | 14 |
| Pdia3.2     | 0.00119952 | 0.27258181 | 0.545 | 0.367 | 1 | 14 |
| Eif3e.6     | 0.00122577 | -0.6487198 | 0.155 | 0.267 | 1 | 14 |
| Tnfaip3.9   | 0.00129147 | -0.7718187 | 0.227 | 0.33  | 1 | 14 |
| Cd83.10     | 0.00144774 | -0.7874864 | 0.455 | 0.471 | 1 | 14 |
| Rpl7a.3     | 0.00155322 | -0.2974897 | 0.764 | 0.762 | 1 | 14 |
| Atpif1.13   | 0.00168209 | -0.5548904 | 0.209 | 0.316 | 1 | 14 |
| Cox7a2l.1   | 0.00174217 | -0.6123697 | 0.273 | 0.364 | 1 | 14 |
| Limd2.7     | 0.00177735 | -0.654526  | 0.264 | 0.357 | 1 | 14 |
| Mbnl1.4     | 0.00182727 | -0.5475437 | 0.245 | 0.341 | 1 | 14 |
| Zyx.11      | 0.00183331 | -0.7222706 | 0.164 | 0.264 | 1 | 14 |
| Ubc.11      | 0.0019663  | -0.4563975 | 0.5   | 0.541 | 1 | 14 |
| Dazap2.2    | 0.00198468 | -0.6513102 | 0.227 | 0.322 | 1 | 14 |
| Ybx1.3      | 0.00201163 | -0.4951307 | 0.555 | 0.555 | 1 | 14 |
| Cstb.8      | 0.00213053 | -0.7138078 | 0.155 | 0.259 | 1 | 14 |
| Itm2b.11    | 0.00216761 | -0.5429963 | 0.836 | 0.787 | 1 | 14 |
| S100a10.12  | 0.00220722 | -0.6473197 | 0.409 | 0.461 | 1 | 14 |
| Anp32a.2    | 0.00239134 | -0.6405749 | 0.2   | 0.299 | 1 | 14 |
| Cox6c.4     | 0.0026636  | -0.4743508 | 0.364 | 0.449 | 1 | 14 |
| Rbm39.6     | 0.00266979 | -0.4539928 | 0.509 | 0.532 | 1 | 14 |
| Atp5l.2     | 0.00274995 | -0.4892177 | 0.491 | 0.516 | 1 | 14 |
| Tom7.1      | 0.00276888 | -0.6017514 | 0.236 | 0.326 | 1 | 14 |
| Ptms.10     | 0.00279072 | -0.5986391 | 0.182 | 0.289 | 1 | 14 |

|            |            |            |       |       |           |    |
|------------|------------|------------|-------|-------|-----------|----|
| Eif3f.8    | 0.0034372  | -0.3732937 | 0.636 | 0.618 | 1         | 14 |
| Sri.3      | 0.00355741 | -0.6045559 | 0.155 | 0.254 | 1         | 14 |
| Calm2.10   | 0.0037995  | -0.6277242 | 0.327 | 0.388 | 1         | 14 |
| Akr1a1.9   | 0.00407818 | -0.5709984 | 0.273 | 0.354 | 1         | 14 |
| Lgals1.11  | 0.00413061 | -0.7547655 | 0.345 | 0.404 | 1         | 14 |
| Snx5.11    | 0.00416777 | -0.6085912 | 0.236 | 0.318 | 1         | 14 |
| Xist.7     | 0.00428934 | -0.4918615 | 0.409 | 0.476 | 1         | 14 |
| Eef1b2.6   | 0.00434046 | -0.3689234 | 0.7   | 0.669 | 1         | 14 |
| Rpl31.2    | 0.0044998  | -0.4788756 | 0.473 | 0.497 | 1         | 14 |
| Wasf2.1    | 0.00454202 | -0.510618  | 0.191 | 0.294 | 1         | 14 |
| Cox7c.2    | 0.00461574 | -0.5587284 | 0.418 | 0.445 | 1         | 14 |
| Gpi1.1     | 0.00481949 | -0.6079009 | 0.236 | 0.314 | 1         | 14 |
| Zfp36l1.10 | 0.00504578 | -0.4856996 | 0.509 | 0.528 | 1         | 14 |
| Atp6v1g1.4 | 0.00509657 | -0.5111511 | 0.2   | 0.293 | 1         | 14 |
| Jak1.5     | 0.00567132 | -0.6097836 | 0.236 | 0.321 | 1         | 14 |
| Tpr        | 0.00601742 | -0.5189611 | 0.273 | 0.353 | 1         | 14 |
| Grcc10.2   | 0.00624084 | -0.588561  | 0.364 | 0.401 | 1         | 14 |
| Arpc4.4    | 0.00705995 | -0.6204725 | 0.291 | 0.343 | 1         | 14 |
| Tuba1b.6   | 0.00711026 | -0.6679636 | 0.245 | 0.321 | 1         | 14 |
| Morf4l1    | 0.00715012 | -0.5373048 | 0.355 | 0.399 | 1         | 14 |
| Calm1.5    | 0.00718417 | -0.3221127 | 0.745 | 0.716 | 1         | 14 |
| Napsa.12   | 0.00722439 | -0.7270933 | 0.182 | 0.265 | 1         | 14 |
| Rnaset2a.5 | 0.00761628 | -0.6080059 | 0.2   | 0.28  | 1         | 14 |
| Gng5.8     | 0.00789374 | -0.3533718 | 0.636 | 0.596 | 1         | 14 |
| Psme1.6    | 0.00821042 | -0.5571334 | 0.355 | 0.405 | 1         | 14 |
| Neat1.12   | 0.00821806 | -0.6787705 | 0.255 | 0.328 | 1         | 14 |
| Ehd4.11    | 0.0083873  | -0.7078629 | 0.191 | 0.268 | 1         | 14 |
| Arhgap45.6 | 0.00843716 | -0.5950263 | 0.236 | 0.316 | 1         | 14 |
| Hmgb2.5    | 0.00936195 | -0.7090052 | 0.173 | 0.251 | 1         | 14 |
| Arhgdia.1  | 0.00941171 | -0.5048042 | 0.336 | 0.392 | 1         | 14 |
| AY036118.7 | 0.00946683 | 0.42176443 | 0.827 | 0.783 | 1         | 14 |
| Hspe1.3    | 0.00966881 | -0.5433235 | 0.218 | 0.298 | 1         | 14 |
| Akap13.2   | 0.00977484 | -0.4755091 | 0.236 | 0.324 | 1         | 14 |
| Atp5h.4    | 0.00981457 | -0.5073573 | 0.527 | 0.497 | 1         | 14 |
| Tnfrsf4    | 0          | 2.39059918 | 0.732 | 0.014 | 0         | 15 |
| Izumo1r    | 0          | 1.89835208 | 0.526 | 0.012 | 0         | 15 |
| Sostdc1    | 1.16E-221  | 2.064122   | 0.278 | 0.004 | 1.92E-217 | 15 |
| Tnfsf8     | 7.92E-134  | 1.65432414 | 0.412 | 0.021 | 1.30E-129 | 15 |
| Ikzf2      | 3.31E-126  | 1.6055411  | 0.454 | 0.027 | 5.44E-122 | 15 |
| Cd3e.2     | 4.77E-114  | 1.88732004 | 0.825 | 0.107 | 7.84E-110 | 15 |
| Ctla4.3    | 1.64E-113  | 1.94827768 | 0.588 | 0.054 | 2.70E-109 | 15 |
| Tox        | 1.91E-112  | 1.374792   | 0.423 | 0.026 | 3.14E-108 | 15 |
| Tigit      | 2.75E-112  | 1.63328612 | 0.485 | 0.035 | 4.52E-108 | 15 |



|             |          |            |       |       |          |    |
|-------------|----------|------------|-------|-------|----------|----|
| Lag3        | 2.35E-94 | 1.41188982 | 0.33  | 0.019 | 3.86E-90 | 15 |
| Cd3g.2      | 9.49E-91 | 1.72132941 | 0.763 | 0.114 | 1.56E-86 | 15 |
| Cd4         | 1.11E-88 | 1.34645903 | 0.402 | 0.03  | 1.83E-84 | 15 |
| Cd5         | 2.31E-85 | 1.30273873 | 0.392 | 0.03  | 3.81E-81 | 15 |
| Cd3d.2      | 4.94E-78 | 1.55315584 | 0.691 | 0.103 | 8.12E-74 | 15 |
| Lck.2       | 4.42E-70 | 1.33117405 | 0.67  | 0.105 | 7.26E-66 | 15 |
| Cd247.1     | 9.83E-70 | 1.46077286 | 0.454 | 0.049 | 1.62E-65 | 15 |
| Icos.2      | 8.10E-62 | 1.34857422 | 0.423 | 0.048 | 1.33E-57 | 15 |
| Tnfrsf18.1  | 1.17E-54 | 1.42278232 | 0.464 | 0.065 | 1.92E-50 | 15 |
| Cd82.3      | 1.52E-48 | 1.56157095 | 0.619 | 0.134 | 2.51E-44 | 15 |
| Pdcd1       | 6.92E-48 | 1.27591271 | 0.258 | 0.023 | 1.14E-43 | 15 |
| Zap70       | 5.67E-43 | 1.07008681 | 0.33  | 0.041 | 9.33E-39 | 15 |
| Trbc2.3     | 8.97E-43 | 1.29657786 | 0.433 | 0.071 | 1.48E-38 | 15 |
| Cst7.1      | 1.14E-42 | 1.13590182 | 0.351 | 0.047 | 1.87E-38 | 15 |
| Cd27.1      | 1.06E-39 | 1.35599822 | 0.33  | 0.046 | 1.74E-35 | 15 |
| Smco4       | 3.39E-39 | 1.11571726 | 0.289 | 0.036 | 5.57E-35 | 15 |
| Trac        | 2.25E-38 | 1.04764085 | 0.268 | 0.031 | 3.70E-34 | 15 |
| Cd2.3       | 3.73E-37 | 1.28641094 | 0.526 | 0.116 | 6.13E-33 | 15 |
| Lat.2       | 7.40E-34 | 1.15753413 | 0.474 | 0.101 | 1.22E-29 | 15 |
| Eea1        | 6.24E-32 | 1.20371773 | 0.423 | 0.087 | 1.03E-27 | 15 |
| Gimap3.6    | 1.77E-30 | 1.09315465 | 0.588 | 0.158 | 2.91E-26 | 15 |
| Ltb.7       | 1.88E-30 | 1.03852397 | 0.66  | 0.201 | 3.09E-26 | 15 |
| Il2rb.1     | 9.16E-30 | 0.86223189 | 0.443 | 0.093 | 1.51E-25 | 15 |
| Slamf6      | 1.68E-29 | 1.15714042 | 0.278 | 0.042 | 2.77E-25 | 15 |
| Tcf7        | 3.01E-29 | 0.86308354 | 0.268 | 0.039 | 4.95E-25 | 15 |
| Socs1       | 9.37E-29 | 1.04321418 | 0.33  | 0.059 | 1.54E-24 | 15 |
| Cxcr3       | 5.69E-28 | 1.08672467 | 0.268 | 0.042 | 9.35E-24 | 15 |
| Il21r.1     | 6.43E-27 | 1.04135059 | 0.443 | 0.107 | 1.06E-22 | 15 |
| Ubald2.2    | 8.32E-26 | 1.18354569 | 0.608 | 0.21  | 1.37E-21 | 15 |
| Ly6a.6      | 1.01E-25 | 1.17692098 | 0.567 | 0.17  | 1.66E-21 | 15 |
| AW112010.10 | 6.29E-25 | 0.8736908  | 0.701 | 0.255 | 1.03E-20 | 15 |
| Tyrobp.13   | 1.30E-23 | -2.3872847 | 0.072 | 0.614 | 2.14E-19 | 15 |
| Prkch.1     | 2.35E-23 | 1.15731522 | 0.34  | 0.075 | 3.87E-19 | 15 |
| Skap1.4     | 3.37E-23 | 1.07395025 | 0.392 | 0.096 | 5.55E-19 | 15 |
| Areg.2      | 5.09E-23 | 1.28691692 | 0.33  | 0.071 | 8.38E-19 | 15 |
| Hif1a       | 5.76E-23 | 1.22309607 | 0.464 | 0.139 | 9.48E-19 | 15 |
| Fcer1g.12   | 6.53E-23 | -2.4470713 | 0.041 | 0.584 | 1.07E-18 | 15 |
| Inpp4b.1    | 2.20E-22 | 0.93124539 | 0.268 | 0.05  | 3.62E-18 | 15 |
| Prkca       | 2.26E-22 | 0.98921792 | 0.32  | 0.069 | 3.72E-18 | 15 |
| Shisa5.10   | 2.40E-22 | 0.95984712 | 0.825 | 0.447 | 3.94E-18 | 15 |
| H2-Q7.6     | 5.14E-10 | -0.7505002 | 0.129 | 0.261 | 8.45E-06 | 8  |
| Bcl11b.1    | 4.69E-22 | 0.87222781 | 0.258 | 0.046 | 7.72E-18 | 15 |
| Fyn         | 6.06E-22 | 0.89780051 | 0.32  | 0.07  | 9.97E-18 | 15 |

|            |            |            |       |       |            |    |
|------------|------------|------------|-------|-------|------------|----|
| Ms4a4b.2   | 6.19E-22   | 0.95546614 | 0.423 | 0.109 | 1.02E-17   | 15 |
| Cst3.12    | 1.04E-21   | -2.4698234 | 0.289 | 0.69  | 1.72E-17   | 15 |
| Gimap6.5   | 1.73E-21   | 0.93310027 | 0.557 | 0.187 | 2.85E-17   | 15 |
| Ets1.5     | 1.86E-21   | 0.94722887 | 0.546 | 0.18  | 3.05E-17   | 15 |
| Ndfip1.4   | 3.32E-21   | 1.05171931 | 0.66  | 0.293 | 5.46E-17   | 15 |
| Cd28.1     | 3.51E-21   | 1.0330825  | 0.309 | 0.067 | 5.78E-17   | 15 |
| Ptprcap.13 | 2.21E-20   | 0.91104352 | 0.649 | 0.26  | 3.64E-16   | 15 |
| Gimap4.5   | 1.13E-19   | 0.84483985 | 0.485 | 0.152 | 1.86E-15   | 15 |
| H2-K1.6    | 5.69E-33   | -0.7755284 | 0.792 | 0.845 | 9.36E-29   | 9  |
| Psap.12    | 2.83E-19   | -1.6564354 | 0.278 | 0.681 | 4.66E-15   | 15 |
| Lyz2.14    | 3.57E-19   | -2.8679648 | 0.093 | 0.56  | 5.88E-15   | 15 |
| H2-Q7.7    | 6.62E-07   | -0.7762449 | 0.154 | 0.259 | 0.01088853 | 9  |
| Thy1.4     | 8.58E-19   | 0.81600815 | 0.423 | 0.121 | 1.41E-14   | 15 |
| Stat1.2    | 9.68E-19   | 1.10862327 | 0.485 | 0.167 | 1.59E-14   | 15 |
| H2-Q7.12   | 0.00872581 | -0.8137663 | 0.111 | 0.256 | 1          | 17 |
| Cd74.11    | 8.34E-18   | -1.2516154 | 0.608 | 0.83  | 1.37E-13   | 15 |
| H2-Eb1.2   | 2.13E-53   | -0.8644812 | 0.528 | 0.726 | 3.50E-49   | 3  |
| Bhlhe40.4  | 2.14E-17   | 1.14132501 | 0.485 | 0.18  | 3.51E-13   | 15 |
| Gapdh.6    | 2.81E-17   | 0.73361718 | 0.907 | 0.711 | 4.62E-13   | 15 |
| Ftl1.13    | 5.75E-17   | -1.2993177 | 0.763 | 0.892 | 9.46E-13   | 15 |
| Zfp36.10   | 1.30E-16   | -1.6421696 | 0.216 | 0.616 | 2.15E-12   | 15 |
| Rac2.12    | 3.49E-16   | 0.7528461  | 0.794 | 0.477 | 5.75E-12   | 15 |
| Ifitm3.13  | 3.89E-16   | -2.0344881 | 0.062 | 0.496 | 6.40E-12   | 15 |
| Gpx1.14    | 4.31E-16   | -1.3852386 | 0.464 | 0.715 | 7.09E-12   | 15 |
| Lcp2       | 1.73E-15   | 0.80573064 | 0.392 | 0.127 | 2.84E-11   | 15 |
| Limd2.8    | 1.83E-15   | 0.7819564  | 0.68  | 0.352 | 3.01E-11   | 15 |
| Fos.10     | 8.74E-15   | -1.789825  | 0.289 | 0.625 | 1.44E-10   | 15 |
| Tspan13.4  | 1.24E-14   | 0.8569334  | 0.433 | 0.161 | 2.04E-10   | 15 |
| Ccl6.14    | 1.37E-14   | -2.0776322 | 0.01  | 0.418 | 2.25E-10   | 15 |
| Malt1.1    | 1.50E-14   | 0.91025686 | 0.381 | 0.128 | 2.46E-10   | 15 |
| Odc1.5     | 1.65E-14   | 1.07311734 | 0.464 | 0.187 | 2.72E-10   | 15 |
| Rinl.2     | 1.81E-14   | 0.78730859 | 0.299 | 0.083 | 2.97E-10   | 15 |
| Il7r.3     | 3.80E-14   | 0.5802794  | 0.289 | 0.076 | 6.26E-10   | 15 |
| Sla        | 4.34E-14   | 0.87492587 | 0.371 | 0.126 | 7.13E-10   | 15 |
| Alox5ap.14 | 6.18E-14   | -1.7047588 | 0.01  | 0.402 | 1.02E-09   | 15 |
| Batf       | 6.29E-14   | 0.99428956 | 0.258 | 0.068 | 1.03E-09   | 15 |
| Rhoh       | 7.12E-14   | 0.6712194  | 0.289 | 0.079 | 1.17E-09   | 15 |
| Itpkb      | 8.19E-14   | 0.90122752 | 0.351 | 0.114 | 1.35E-09   | 15 |
| Pnrc1.7    | 1.01E-13   | 0.75076829 | 0.804 | 0.513 | 1.66E-09   | 15 |
| H2-DMa.9   | 4.12E-07   | -0.8748066 | 0.186 | 0.429 | 0.00677298 | 15 |
| Sdf4.1     | 2.41E-13   | 0.98970545 | 0.474 | 0.21  | 3.97E-09   | 15 |
| Gm8369.1   | 4.39E-13   | 0.73022089 | 0.258 | 0.068 | 7.23E-09   | 15 |
| Apoe.13    | 8.39E-13   | -2.9606164 | 0.134 | 0.475 | 1.38E-08   | 15 |

|             |          |            |       |       |          |    |
|-------------|----------|------------|-------|-------|----------|----|
| Srgn.6      | 1.93E-12 | 0.73517151 | 0.866 | 0.67  | 3.17E-08 | 15 |
| Fosb.10     | 2.92E-12 | -1.3733547 | 0.144 | 0.506 | 4.80E-08 | 15 |
| Gna13       | 3.68E-12 | 0.78931738 | 0.402 | 0.156 | 6.05E-08 | 15 |
| Rabgap1l    | 3.97E-12 | 0.70168125 | 0.278 | 0.083 | 6.54E-08 | 15 |
| Tmem176b.11 | 4.29E-12 | -1.4174841 | 0.082 | 0.443 | 7.06E-08 | 15 |
| Crip1.13    | 5.19E-12 | -1.1901428 | 0.495 | 0.723 | 8.53E-08 | 15 |
| Ubb.3       | 5.79E-12 | 0.4135644  | 0.979 | 0.873 | 9.53E-08 | 15 |
| Ctsh.11     | 1.41E-11 | -1.3193807 | 0.052 | 0.39  | 2.32E-07 | 15 |
| Mt1.14      | 1.59E-11 | -2.183854  | 0.093 | 0.42  | 2.61E-07 | 15 |
| Unc93b1.6   | 1.59E-11 | -1.2267659 | 0.134 | 0.467 | 2.62E-07 | 15 |
| Tgif1.1     | 2.07E-11 | 0.82652233 | 0.351 | 0.132 | 3.40E-07 | 15 |
| Pltp.14     | 2.24E-11 | -1.8368902 | 0.01  | 0.341 | 3.68E-07 | 15 |
| Nfatc1.2    | 2.62E-11 | 0.71471423 | 0.351 | 0.128 | 4.30E-07 | 15 |
| Csf1r.14    | 2.69E-11 | -1.845167  | 0.01  | 0.337 | 4.42E-07 | 15 |
| Malat1.8    | 3.00E-11 | 0.4707457  | 0.979 | 0.936 | 4.93E-07 | 15 |
| Fth1.12     | 3.24E-11 | -0.6942379 | 0.928 | 0.958 | 5.33E-07 | 15 |
| Pglyrp1.2   | 4.64E-11 | 0.69062937 | 0.258 | 0.077 | 7.63E-07 | 15 |
| Egr1.12     | 5.11E-11 | -1.7054125 | 0.134 | 0.462 | 8.40E-07 | 15 |
| Il2rg.10    | 7.67E-11 | 0.79167301 | 0.536 | 0.281 | 1.26E-06 | 15 |
| Myh9.8      | 9.47E-11 | 0.58024867 | 0.773 | 0.499 | 1.56E-06 | 15 |
| Ptpn11      | 9.50E-11 | 0.90525633 | 0.309 | 0.111 | 1.56E-06 | 15 |
| Ptpn22      | 1.11E-10 | 0.73800832 | 0.268 | 0.085 | 1.82E-06 | 15 |
| Ier3.11     | 1.42E-10 | -1.8810977 | 0.021 | 0.329 | 2.34E-06 | 15 |
| Mcl1.12     | 1.82E-10 | -1.2230838 | 0.113 | 0.431 | 2.99E-06 | 15 |
| Cdkn1b      | 1.99E-10 | 0.69937338 | 0.33  | 0.121 | 3.27E-06 | 15 |
| Grn.11      | 2.48E-10 | -1.4655757 | 0.072 | 0.38  | 4.09E-06 | 15 |
| Wfdc17.12   | 2.85E-10 | -1.7225172 | 0.031 | 0.333 | 4.69E-06 | 15 |
| Marcks.12   | 3.20E-10 | -1.3734471 | 0.031 | 0.336 | 5.27E-06 | 15 |
| S100a11.9   | 3.54E-10 | 0.73140606 | 0.649 | 0.395 | 5.82E-06 | 15 |
| Chd3.2      | 4.34E-10 | 0.64201677 | 0.33  | 0.123 | 7.14E-06 | 15 |
| Ctsc.12     | 4.91E-10 | -1.4393679 | 0.124 | 0.419 | 8.08E-06 | 15 |
| Peli1       | 1.09E-09 | 0.6682173  | 0.34  | 0.134 | 1.79E-05 | 15 |
| Mrc1.14     | 1.13E-09 | -1.711843  | 0.021 | 0.309 | 1.86E-05 | 15 |
| C1qc.14     | 1.19E-09 | -2.4685136 | 0.052 | 0.337 | 1.95E-05 | 15 |
| Atf3.11     | 1.19E-09 | -1.3832369 | 0.227 | 0.51  | 1.97E-05 | 15 |
| Pld4.10     | 1.30E-09 | -1.2177487 | 0.041 | 0.329 | 2.14E-05 | 15 |
| Cirbp.1     | 1.44E-09 | 0.6849962  | 0.392 | 0.166 | 2.37E-05 | 15 |
| Vps37b.9    | 1.74E-09 | 0.63019413 | 0.505 | 0.241 | 2.85E-05 | 15 |
| C1qa.14     | 1.79E-09 | -2.3399581 | 0.052 | 0.333 | 2.95E-05 | 15 |
| Smc4.1      | 2.05E-09 | 0.84314183 | 0.278 | 0.101 | 3.37E-05 | 15 |
| Rgs1        | 2.19E-09 | 0.71672168 | 0.309 | 0.115 | 3.61E-05 | 15 |
| Pf4.15      | 2.29E-09 | -2.4902771 | 0.031 | 0.31  | 3.76E-05 | 15 |
| Fyb.10      | 2.30E-09 | 0.78386578 | 0.495 | 0.247 | 3.79E-05 | 15 |

|             |          |            |       |       |            |    |
|-------------|----------|------------|-------|-------|------------|----|
| Plek.8      | 2.59E-09 | -1.1127836 | 0.052 | 0.35  | 4.26E-05   | 15 |
| Kctd12.12   | 2.70E-09 | -1.2025647 | 0.082 | 0.374 | 4.45E-05   | 15 |
| Ifitm2.13   | 2.81E-09 | -1.3095017 | 0.103 | 0.394 | 4.63E-05   | 15 |
| Cfp.13      | 2.94E-09 | -1.3168866 | 0.031 | 0.315 | 4.84E-05   | 15 |
| Junb.11     | 3.02E-09 | 0.46863086 | 0.928 | 0.842 | 4.97E-05   | 15 |
| Spi1.11     | 3.36E-09 | -1.1860989 | 0.031 | 0.309 | 5.52E-05   | 15 |
| Ddx39b.1    | 3.47E-09 | 0.62528271 | 0.381 | 0.165 | 5.71E-05   | 15 |
| Klf4.11     | 3.58E-09 | -1.5768874 | 0.093 | 0.379 | 5.89E-05   | 15 |
| H2-DMb1.14  | 1.54E-05 | -0.9672355 | 0.119 | 0.33  | 0.25373077 | 16 |
| Akap13.3    | 7.18E-09 | 0.56916947 | 0.567 | 0.32  | 0.00011817 | 15 |
| Smpdl3a.2   | 7.54E-09 | 0.75313457 | 0.361 | 0.158 | 0.00012404 | 15 |
| Eef1a1.10   | 7.60E-09 | 0.25864038 | 1     | 0.98  | 0.00012502 | 15 |
| Nrros.13    | 8.78E-09 | -1.1492498 | 0.021 | 0.288 | 0.00014441 | 15 |
| Tmem176a.10 | 9.39E-09 | -1.2493921 | 0.062 | 0.337 | 0.0001544  | 15 |
| Fcgrt.13    | 9.48E-09 | -1.4014213 | 0     | 0.26  | 0.00015586 | 15 |
| Mafb.13     | 1.62E-08 | -1.7512722 | 0.01  | 0.267 | 0.00026728 | 15 |
| Marcks1.12  | 1.67E-08 | -1.3115927 | 0.165 | 0.438 | 0.00027503 | 15 |
| C1qb.14     | 1.75E-08 | -2.2734318 | 0.103 | 0.356 | 0.00028736 | 15 |
| Sept1.5     | 1.76E-08 | 0.58925103 | 0.381 | 0.165 | 0.00028981 | 15 |
| Itga4.3     | 2.01E-08 | 0.64584841 | 0.433 | 0.21  | 0.00033077 | 15 |
| Fcgr2b.8    | 2.06E-08 | -1.0937816 | 0.021 | 0.282 | 0.0003391  | 15 |
| Cd68.11     | 2.44E-08 | -1.1936975 | 0.021 | 0.275 | 0.00040115 | 15 |
| Nrip1.1     | 2.89E-08 | 0.82197344 | 0.278 | 0.108 | 0.00047456 | 15 |
| Pfn1.6      | 3.33E-08 | 0.33857242 | 0.948 | 0.858 | 0.00054771 | 15 |
| F13a1.13    | 3.34E-08 | -1.6268942 | 0.031 | 0.283 | 0.00055011 | 15 |
| Coro1a.7    | 3.39E-08 | 0.42116292 | 0.835 | 0.634 | 0.00055838 | 15 |
| Gstm1.12    | 3.71E-08 | 0.44423848 | 0.876 | 0.643 | 0.00061002 | 15 |
| Lgmn.14     | 3.78E-08 | -1.3399418 | 0.031 | 0.282 | 0.00062156 | 15 |
| Nfatc3      | 6.41E-08 | 0.64474522 | 0.258 | 0.095 | 0.00105376 | 15 |
| App.10      | 6.94E-08 | -1.1128363 | 0.031 | 0.277 | 0.0011422  | 15 |
| Btg1.9      | 7.08E-08 | 0.48360219 | 0.825 | 0.57  | 0.0011642  | 15 |
| Per1        | 7.09E-08 | 0.69344569 | 0.278 | 0.113 | 0.00116593 | 15 |
| Kmt2a       | 7.26E-08 | 0.60782237 | 0.289 | 0.115 | 0.00119478 | 15 |
| Ccl2.14     | 7.96E-08 | -2.0226185 | 0.041 | 0.284 | 0.00130989 | 15 |
| Emb.4       | 1.05E-07 | 0.53093312 | 0.423 | 0.201 | 0.0017192  | 15 |
| H2-DMb1.13  | 1.15E-07 | -1.0002195 | 0.072 | 0.331 | 0.00189031 | 15 |
| Lgals3.14   | 1.19E-07 | -1.1661824 | 0.103 | 0.353 | 0.00196005 | 15 |
| Zeb2.13     | 1.59E-07 | -1.0371188 | 0.052 | 0.299 | 0.00261044 | 15 |
| Cd14.14     | 1.88E-07 | -1.3929558 | 0.031 | 0.263 | 0.00309595 | 15 |
| Ptprc.6     | 2.52E-07 | 0.52631496 | 0.639 | 0.438 | 0.00414971 | 15 |
| Orai1       | 3.25E-07 | 0.69869398 | 0.33  | 0.16  | 0.00534892 | 15 |
| Itgal.3     | 3.34E-07 | 0.54394061 | 0.278 | 0.116 | 0.00549016 | 15 |
| Hexa.11     | 3.55E-07 | -1.0654541 | 0.062 | 0.294 | 0.00584358 | 15 |

|            |            |            |       |       |            |    |
|------------|------------|------------|-------|-------|------------|----|
| H2-Q7      | 4.41E-76   | -1.014703  | 0.078 | 0.299 | 7.26E-72   | 0  |
| Arhgap45.7 | 4.17E-07   | 0.48514366 | 0.526 | 0.312 | 0.00686716 | 15 |
| Npc2.11    | 4.63E-07   | -0.7013844 | 0.247 | 0.516 | 0.00761401 | 15 |
| H2afz.14   | 4.70E-07   | 0.55056061 | 0.773 | 0.586 | 0.00773112 | 15 |
| Nfkbiz.12  | 4.86E-07   | -0.9943701 | 0.206 | 0.444 | 0.00799327 | 15 |
| Pkm.6      | 4.94E-07   | 0.55370498 | 0.515 | 0.306 | 0.00812379 | 15 |
| Jun.13     | 6.89E-07   | -1.4095977 | 0.247 | 0.465 | 0.01133324 | 15 |
| Erp29.9    | 7.35E-07   | -0.7815719 | 0.124 | 0.37  | 0.01209755 | 15 |
| Stk17b.8   | 7.51E-07   | 0.53128287 | 0.649 | 0.434 | 0.01234819 | 15 |
| Eprs       | 7.89E-07   | 0.67266647 | 0.289 | 0.127 | 0.01297455 | 15 |
| Gsta4.4    | 7.94E-07   | 0.5368001  | 0.423 | 0.223 | 0.01306758 | 15 |
| Tmsb10.12  | 8.46E-07   | 0.29311557 | 0.959 | 0.784 | 0.01392203 | 15 |
| Cd69.3     | 1.09E-06   | 0.47935054 | 0.258 | 0.103 | 0.017938   | 15 |
| Cxcl2.13   | 1.23E-06   | -2.006134  | 0.041 | 0.253 | 0.02016936 | 15 |
| Ehd4.12    | 1.46E-06   | -0.9332319 | 0.052 | 0.27  | 0.02401627 | 15 |
| B2m.9      | 1.49E-06   | 0.33843935 | 0.907 | 0.806 | 0.02449562 | 15 |
| Selenop.14 | 1.50E-06   | -1.8485689 | 0.227 | 0.418 | 0.02467163 | 15 |
| Cdk2ap2.7  | 1.67E-06   | 0.4979052  | 0.464 | 0.263 | 0.02746274 | 15 |
| Tnfaip3.10 | 1.68E-06   | 0.62354637 | 0.515 | 0.326 | 0.02766507 | 15 |
| Fxyd5.14   | 2.63E-06   | 0.4785769  | 0.67  | 0.462 | 0.0432046  | 15 |
| Eef2.5     | 2.72E-06   | 0.31303715 | 0.856 | 0.73  | 0.04466159 | 15 |
| Ncor1.2    | 2.88E-06   | 0.52968165 | 0.371 | 0.196 | 0.04738753 | 15 |
| H2-DMa.8   | 1.10E-07   | -1.0365682 | 0.236 | 0.429 | 0.00181391 | 14 |
| Ankrd12    | 3.56E-06   | 0.62560263 | 0.258 | 0.114 | 0.05850671 | 15 |
| Itgb7.5    | 4.46E-06   | 0.48524181 | 0.361 | 0.185 | 0.07339731 | 15 |
| Tnfrsf1b.1 | 4.55E-06   | 0.56921471 | 0.258 | 0.113 | 0.07485023 | 15 |
| Clic4.11   | 4.62E-06   | -0.9131856 | 0.052 | 0.254 | 0.07596548 | 15 |
| Rpsa.9     | 4.81E-06   | 0.25179393 | 1     | 0.934 | 0.07904221 | 15 |
| Itgb1.2    | 5.18E-06   | 0.7575039  | 0.402 | 0.242 | 0.0852498  | 15 |
| Ly86.9     | 5.45E-06   | -0.7889259 | 0.103 | 0.321 | 0.08960568 | 15 |
| Ctss.11    | 5.45E-06   | -0.7123473 | 0.289 | 0.504 | 0.08969403 | 15 |
| H2-DMa.13  | 0.00210077 | -1.0515716 | 0.172 | 0.427 | 1          | 19 |
| Gm2a.13    | 5.86E-06   | -0.9109748 | 0.082 | 0.289 | 0.09640788 | 15 |
| Phf20l1    | 5.91E-06   | 0.5684087  | 0.268 | 0.12  | 0.09726509 | 15 |
| Ghitm      | 6.26E-06   | 0.4720497  | 0.299 | 0.143 | 0.1029466  | 15 |
| Sept9.5    | 7.36E-06   | 0.73281753 | 0.309 | 0.157 | 0.12110556 | 15 |
| Ypel3.6    | 1.11E-05   | 0.47664486 | 0.485 | 0.303 | 0.18308821 | 15 |
| Csnk1a1    | 1.13E-05   | 0.57203208 | 0.381 | 0.221 | 0.18636402 | 15 |
| Tnfaip8.2  | 1.34E-05   | 0.567754   | 0.34  | 0.183 | 0.22028079 | 15 |
| Cybb.10    | 1.34E-05   | -0.8291744 | 0.134 | 0.332 | 0.22115651 | 15 |
| Atp6v0b.10 | 1.56E-05   | -0.7652543 | 0.165 | 0.362 | 0.25639561 | 15 |
| Prkar1a.3  | 1.59E-05   | 0.53973749 | 0.392 | 0.229 | 0.26160742 | 15 |
| Cnn2.6     | 1.78E-05   | 0.37193972 | 0.546 | 0.345 | 0.2927498  | 15 |

|            |            |            |       |       |            |    |
|------------|------------|------------|-------|-------|------------|----|
| Fam107b.3  | 1.80E-05   | 0.63788433 | 0.33  | 0.179 | 0.29628646 | 15 |
| Xist.8     | 1.92E-05   | 0.43628796 | 0.66  | 0.472 | 0.31638176 | 15 |
| B4galnt1.2 | 1.95E-05   | 0.45595602 | 0.309 | 0.154 | 0.32123436 | 15 |
| Rbm39.7    | 2.35E-05   | 0.48899185 | 0.691 | 0.529 | 0.38655837 | 15 |
| mt-Atp8.11 | 2.50E-05   | 0.25796021 | 1     | 0.928 | 0.41042047 | 15 |
| Lcp1.5     | 3.01E-05   | 0.37344862 | 0.711 | 0.532 | 0.49504209 | 15 |
| Rbm3.6     | 3.41E-05   | 0.37028562 | 0.722 | 0.551 | 0.56108515 | 15 |
| Rpl10.4    | 4.33E-05   | -0.4660268 | 0.515 | 0.679 | 0.71149168 | 15 |
| Lrp10      | 5.05E-05   | 0.48792845 | 0.278 | 0.14  | 0.83089771 | 15 |
| Csnk2b.2   | 5.70E-05   | 0.40867672 | 0.34  | 0.186 | 0.93784158 | 15 |
| Hcst.4     | 5.73E-05   | 0.4534289  | 0.351 | 0.193 | 0.942113   | 15 |
| Man2b1.10  | 6.25E-05   | -0.6890613 | 0.124 | 0.301 | 1          | 15 |
| Tnrc6b     | 6.67E-05   | 0.4165232  | 0.258 | 0.123 | 1          | 15 |
| Tsn        | 6.93E-05   | 0.4930785  | 0.289 | 0.15  | 1          | 15 |
| Aldoa.7    | 8.26E-05   | 0.49468791 | 0.515 | 0.365 | 1          | 15 |
| Ppia.7     | 8.30E-05   | 0.27412019 | 0.897 | 0.888 | 1          | 15 |
| Cltc.12    | 8.54E-05   | -0.6046519 | 0.144 | 0.334 | 1          | 15 |
| Neat1.13   | 8.82E-05   | -0.8063235 | 0.144 | 0.329 | 1          | 15 |
| Atox1.14   | 9.13E-05   | -0.6285593 | 0.289 | 0.458 | 1          | 15 |
| Litaf.6    | 9.21E-05   | -0.5916518 | 0.082 | 0.266 | 1          | 15 |
| Vim.12     | 9.34E-05   | -0.6060749 | 0.474 | 0.624 | 1          | 15 |
| Saraf.3    | 9.36E-05   | 0.50921515 | 0.309 | 0.172 | 1          | 15 |
| Myl12b.7   | 9.40E-05   | 0.36498649 | 0.67  | 0.505 | 1          | 15 |
| Serbp1.6   | 9.48E-05   | 0.3766666  | 0.557 | 0.383 | 1          | 15 |
| Camk2d.2   | 0.00010108 | 0.42990445 | 0.258 | 0.127 | 1          | 15 |
| Tmsb4x.10  | 0.00010134 | -0.2866795 | 1     | 0.993 | 1          | 15 |
| Clta.11    | 0.00010868 | -0.544256  | 0.371 | 0.551 | 1          | 15 |
| Rapgef6.1  | 0.00011261 | 0.36882758 | 0.33  | 0.178 | 1          | 15 |
| Eif3f.9    | 0.00012491 | 0.35852622 | 0.742 | 0.616 | 1          | 15 |
| Pim1.7     | 0.00012749 | -0.5798062 | 0.268 | 0.452 | 1          | 15 |
| Bri3.12    | 0.00012899 | -0.6671376 | 0.196 | 0.374 | 1          | 15 |
| Lrrfip1.1  | 0.00013147 | 0.59519612 | 0.289 | 0.158 | 1          | 15 |
| Ddx24      | 0.00013777 | 0.38907093 | 0.361 | 0.205 | 1          | 15 |
| Arl6ip1.5  | 0.00015708 | 0.42879402 | 0.495 | 0.338 | 1          | 15 |
| Mdh1.4     | 0.00015905 | 0.56477046 | 0.351 | 0.211 | 1          | 15 |
| Ppp1r12a.3 | 0.00016215 | 0.43359947 | 0.351 | 0.206 | 1          | 15 |
| Ythdc1.1   | 0.0001735  | 0.5085774  | 0.32  | 0.185 | 1          | 15 |
| Psma2.2    | 0.00018137 | 0.42296151 | 0.371 | 0.226 | 1          | 15 |
| Rps29.4    | 0.00019056 | -0.3095234 | 0.794 | 0.895 | 1          | 15 |
| Dad1.4     | 0.00019086 | 0.46252768 | 0.474 | 0.324 | 1          | 15 |
| Sf3b2.1    | 0.00019983 | 0.46143161 | 0.423 | 0.277 | 1          | 15 |
| Bcl2a1b.3  | 0.00020006 | 0.55204024 | 0.34  | 0.197 | 1          | 15 |
| Capg.9     | 0.00020437 | 0.43682847 | 0.402 | 0.256 | 1          | 15 |

|            |            |            |       |       |   |    |
|------------|------------|------------|-------|-------|---|----|
| Tecr       | 0.00022452 | 0.42809428 | 0.299 | 0.165 | 1 | 15 |
| Zyx.12     | 0.00023541 | -0.6229814 | 0.103 | 0.265 | 1 | 15 |
| Apbb1ip.2  | 0.00024095 | 0.40912356 | 0.34  | 0.201 | 1 | 15 |
| Atp5c1.4   | 0.00030052 | 0.34000682 | 0.495 | 0.341 | 1 | 15 |
| Ube2b      | 0.00031934 | 0.46034646 | 0.361 | 0.214 | 1 | 15 |
| Son        | 0.00032045 | 0.36182849 | 0.495 | 0.351 | 1 | 15 |
| Klf2.12    | 0.00032677 | -0.5396525 | 0.454 | 0.596 | 1 | 15 |
| Cd83.11    | 0.00039111 | -0.6354739 | 0.309 | 0.473 | 1 | 15 |
| Prdx2.1    | 0.00040554 | 0.45103294 | 0.361 | 0.223 | 1 | 15 |
| Arf4.1     | 0.0004251  | 0.50081044 | 0.361 | 0.221 | 1 | 15 |
| Sri.4      | 0.00043174 | 0.43109922 | 0.392 | 0.251 | 1 | 15 |
| Ctsa.12    | 0.00043754 | -0.5487581 | 0.124 | 0.286 | 1 | 15 |
| Traf1.2    | 0.00050184 | 0.58822473 | 0.258 | 0.143 | 1 | 15 |
| Arid4a     | 0.00052021 | 0.4062772  | 0.258 | 0.141 | 1 | 15 |
| Lamp1.13   | 0.00060597 | -0.6309749 | 0.268 | 0.416 | 1 | 15 |
| Psmb8.6    | 0.00065232 | 0.40935614 | 0.619 | 0.478 | 1 | 15 |
| Snx5.12    | 0.00066782 | -0.5786155 | 0.165 | 0.319 | 1 | 15 |
| Grcc10.3   | 0.0006737  | 0.40305032 | 0.526 | 0.399 | 1 | 15 |
| Arhgdib.8  | 0.0006803  | 0.34838076 | 0.711 | 0.594 | 1 | 15 |
| S100a10.13 | 0.00068702 | 0.30368038 | 0.639 | 0.458 | 1 | 15 |
| Cct8       | 0.00074689 | 0.42685064 | 0.278 | 0.16  | 1 | 15 |
| Ldha.7     | 0.000757   | 0.4237625  | 0.485 | 0.337 | 1 | 15 |
| Sptbn1.1   | 0.00080035 | 0.43363501 | 0.278 | 0.16  | 1 | 15 |
| Rrbp1.11   | 0.00090153 | -0.4447675 | 0.175 | 0.351 | 1 | 15 |
| Srpr.1     | 0.00094337 | 0.43300246 | 0.258 | 0.144 | 1 | 15 |
| Serinc3.11 | 0.00098942 | -0.5945108 | 0.206 | 0.359 | 1 | 15 |
| Bcl2a1d.3  | 0.00101459 | 0.34958184 | 0.278 | 0.158 | 1 | 15 |
| Serf2.10   | 0.00111711 | -0.305398  | 0.722 | 0.762 | 1 | 15 |
| Ube2i.3    | 0.00116862 | 0.53903681 | 0.351 | 0.233 | 1 | 15 |
| Napsa.13   | 0.00116908 | -0.6191649 | 0.124 | 0.266 | 1 | 15 |
| Jak1.6     | 0.00117504 | 0.34544877 | 0.454 | 0.318 | 1 | 15 |
| Psme1.7    | 0.00152845 | 0.37924882 | 0.536 | 0.403 | 1 | 15 |
| Ube2d3     | 0.00154989 | 0.40375562 | 0.505 | 0.381 | 1 | 15 |
| mt-Nd6     | 0.00156273 | 0.34723907 | 0.309 | 0.187 | 1 | 15 |
| 7-Sep      | 0.00157031 | 0.33781819 | 0.309 | 0.188 | 1 | 15 |
| Atrx.1     | 0.0016415  | 0.37069551 | 0.289 | 0.173 | 1 | 15 |
| Prrc2c.3   | 0.0016756  | 0.28411564 | 0.423 | 0.275 | 1 | 15 |
| Arf1.1     | 0.00171721 | 0.37992255 | 0.454 | 0.329 | 1 | 15 |
| Msn.6      | 0.00173384 | 0.26589444 | 0.577 | 0.433 | 1 | 15 |
| Cnbp.9     | 0.00173547 | 0.3072094  | 0.546 | 0.428 | 1 | 15 |
| Tob2       | 0.00176735 | 0.31867685 | 0.299 | 0.178 | 1 | 15 |
| Anxa5.10   | 0.00176933 | -0.5289422 | 0.206 | 0.344 | 1 | 15 |
| Cd37.10    | 0.00178067 | 0.2673979  | 0.485 | 0.328 | 1 | 15 |

|             |            |            |       |       |   |    |
|-------------|------------|------------|-------|-------|---|----|
| Vcp.1       | 0.00188184 | 0.29944427 | 0.392 | 0.259 | 1 | 15 |
| Sem1.8      | 0.00191705 | -0.3747498 | 0.392 | 0.551 | 1 | 15 |
| Sec11c.4    | 0.00204382 | -0.5082765 | 0.134 | 0.264 | 1 | 15 |
| Hsp90b1.5   | 0.00212886 | -0.4358776 | 0.33  | 0.477 | 1 | 15 |
| Cd52.10     | 0.00217953 | 0.25074433 | 0.835 | 0.733 | 1 | 15 |
| Rpl35a.5    | 0.00219145 | -0.3124497 | 0.577 | 0.713 | 1 | 15 |
| Puf60.1     | 0.00219606 | 0.37120377 | 0.258 | 0.149 | 1 | 15 |
| Rnf187.1    | 0.00231535 | 0.3200944  | 0.309 | 0.191 | 1 | 15 |
| Tmbim4.1    | 0.00233218 | 0.35649047 | 0.258 | 0.151 | 1 | 15 |
| Akr1a1.10   | 0.00234248 | -0.4298516 | 0.206 | 0.354 | 1 | 15 |
| Atp6v1g1.5  | 0.00245868 | -0.4458083 | 0.155 | 0.294 | 1 | 15 |
| Psemb1.5    | 0.00250673 | 0.40661735 | 0.423 | 0.31  | 1 | 15 |
| Anxa2.14    | 0.00252424 | -0.4373368 | 0.134 | 0.277 | 1 | 15 |
| Igkv1-117.4 | 0.00262299 | -0.6103017 | 0.33  | 0.202 | 1 | 15 |
| Psme2.6     | 0.00289367 | 0.41089962 | 0.443 | 0.333 | 1 | 15 |
| H2afy.8     | 0.00296712 | -0.5108272 | 0.124 | 0.254 | 1 | 15 |
| Gm8797      | 0.00300179 | 0.33438845 | 0.32  | 0.208 | 1 | 15 |
| Ier2.12     | 0.00341882 | -0.5059114 | 0.433 | 0.557 | 1 | 15 |
| Rnaset2a.6  | 0.00348711 | 0.40442171 | 0.392 | 0.277 | 1 | 15 |
| Eno1.7      | 0.00359425 | 0.27980293 | 0.546 | 0.411 | 1 | 15 |
| Gpr132.5    | 0.00360341 | 0.33536646 | 0.34  | 0.223 | 1 | 15 |
| Rnaset2b.1  | 0.00361888 | 0.47965531 | 0.32  | 0.218 | 1 | 15 |
| Zfand5.9    | 0.00369977 | -0.4584859 | 0.134 | 0.263 | 1 | 15 |
| Sdcbp.9     | 0.00370154 | -0.3338052 | 0.134 | 0.277 | 1 | 15 |
| Gm42418.4   | 0.00370988 | -0.3136073 | 1     | 1     | 1 | 15 |
| Eif3c.1     | 0.00419051 | 0.33318307 | 0.371 | 0.257 | 1 | 15 |
| Prdx5.10    | 0.00429101 | -0.5200533 | 0.206 | 0.337 | 1 | 15 |
| Ost4.1      | 0.00438922 | -0.322424  | 0.206 | 0.355 | 1 | 15 |
| Kmt2e.5     | 0.00442656 | 0.28340182 | 0.392 | 0.269 | 1 | 15 |
| Hmgb1.6     | 0.00443755 | 0.32735409 | 0.536 | 0.418 | 1 | 15 |
| Ier5.10     | 0.00446853 | -0.4506849 | 0.237 | 0.373 | 1 | 15 |
| Btg2.9      | 0.00469183 | -0.3234188 | 0.557 | 0.672 | 1 | 15 |
| Mtdh.1      | 0.00494639 | -0.3444773 | 0.216 | 0.354 | 1 | 15 |
| Tmem50a.4   | 0.00498703 | 0.27113034 | 0.464 | 0.344 | 1 | 15 |
| Ctsb.14     | 0.0054513  | -0.8766167 | 0.412 | 0.477 | 1 | 15 |
| Mycbp2.1    | 0.00550152 | 0.3774263  | 0.351 | 0.243 | 1 | 15 |
| Atp5b.4     | 0.00575361 | 0.37449428 | 0.474 | 0.358 | 1 | 15 |
| Tpm4.4      | 0.00587924 | 0.50983098 | 0.34  | 0.243 | 1 | 15 |
| Ddx5.6      | 0.00588903 | 0.26742136 | 0.732 | 0.702 | 1 | 15 |
| Ezr.6       | 0.00595634 | 0.32305201 | 0.351 | 0.235 | 1 | 15 |
| Stk4.1      | 0.0062071  | 0.33948628 | 0.258 | 0.161 | 1 | 15 |
| Ctsz.8      | 0.00627381 | -0.4149956 | 0.227 | 0.354 | 1 | 15 |
| Skp1a       | 0.00648134 | 0.35101376 | 0.268 | 0.168 | 1 | 15 |



|            |            |            |       |       |           |    |
|------------|------------|------------|-------|-------|-----------|----|
| Ptms.11    | 0.00675857 | 0.28202098 | 0.412 | 0.286 | 1         | 15 |
| Tomm20.2   | 0.00703554 | 0.3516221  | 0.361 | 0.252 | 1         | 15 |
| Trir.2     | 0.00709119 | 0.36300634 | 0.33  | 0.224 | 1         | 15 |
| Gstp1.6    | 0.00709553 | 0.41055014 | 0.402 | 0.296 | 1         | 15 |
| Eif4a2.2   | 0.0073082  | 0.25343545 | 0.258 | 0.156 | 1         | 15 |
| Hnrnpk     | 0.00742222 | 0.35902909 | 0.454 | 0.363 | 1         | 15 |
| Eif3i.3    | 0.00748917 | 0.31880418 | 0.381 | 0.265 | 1         | 15 |
| Itm2b.12   | 0.0075624  | -0.4899306 | 0.773 | 0.788 | 1         | 15 |
| Mif.7      | 0.00835124 | 0.3804603  | 0.351 | 0.247 | 1         | 15 |
| Lbh.1      | 0.00837469 | 0.43936711 | 0.268 | 0.175 | 1         | 15 |
| Foxp1.9    | 0.00857703 | -0.3647269 | 0.144 | 0.268 | 1         | 15 |
| G3bp1      | 0.00861834 | 0.3464095  | 0.268 | 0.171 | 1         | 15 |
| Psma3.1    | 0.00875576 | 0.26312359 | 0.351 | 0.244 | 1         | 15 |
| Rpl22l1.7  | 0.00888718 | 0.34794849 | 0.526 | 0.441 | 1         | 15 |
| Elob.3     | 0.0094537  | 0.26478602 | 0.546 | 0.435 | 1         | 15 |
| Cyba.6     | 0.00970841 | -0.2876845 | 0.608 | 0.719 | 1         | 15 |
| Pde4b.10   | 0.00981003 | -0.3624515 | 0.299 | 0.419 | 1         | 15 |
| Fscn1      | 0          | 3.37265045 | 0.893 | 0.015 | 0         | 16 |
| Apol7c     | 0          | 2.57938295 | 0.571 | 0.004 | 0         | 16 |
| Cacnb3     | 0          | 1.80919506 | 0.583 | 0.001 | 0         | 16 |
| Nudt17     | 0          | 1.57213956 | 0.452 | 0.001 | 0         | 16 |
| H2-Q7.2    | 1.96E-43   | -1.0535669 | 0.032 | 0.276 | 3.22E-39  | 3  |
| Mreg       | 2.16E-275  | 1.11254478 | 0.381 | 0.005 | 3.55E-271 | 16 |
| Socs2      | 1.16E-271  | 1.70378127 | 0.548 | 0.014 | 1.90E-267 | 16 |
| Il4i1      | 5.57E-260  | 2.18420239 | 0.69  | 0.026 | 9.16E-256 | 16 |
| Ccl22      | 7.28E-235  | 2.90659086 | 0.5   | 0.014 | 1.20E-230 | 16 |
| Il12b      | 7.54E-212  | 1.74315124 | 0.298 | 0.004 | 1.24E-207 | 16 |
| Strip2     | 1.06E-207  | 0.93865817 | 0.321 | 0.006 | 1.74E-203 | 16 |
| Ankrd33b   | 6.00E-151  | 1.26773421 | 0.405 | 0.015 | 9.86E-147 | 16 |
| Aldh1a2    | 6.68E-144  | 1.54147063 | 0.44  | 0.019 | 1.10E-139 | 16 |
| Zmynd15    | 2.97E-143  | 1.27900814 | 0.298 | 0.008 | 4.88E-139 | 16 |
| Tbc1d4     | 1.46E-127  | 1.69537741 | 0.595 | 0.042 | 2.40E-123 | 16 |
| Fabp5      | 1.52E-123  | 2.62412822 | 0.702 | 0.065 | 2.50E-119 | 16 |
| Rogdi      | 1.86E-111  | 1.65047615 | 0.667 | 0.062 | 3.06E-107 | 16 |
| Anxa3      | 5.39E-108  | 1.71640948 | 0.655 | 0.061 | 8.86E-104 | 16 |
| Tmem123.1  | 1.94E-98   | 2.28540505 | 0.893 | 0.149 | 3.20E-94  | 16 |
| Plxnc1     | 7.88E-94   | 1.17538933 | 0.452 | 0.032 | 1.30E-89  | 16 |
| Basp1.1    | 4.55E-92   | 1.68130103 | 0.667 | 0.075 | 7.49E-88  | 16 |
| Ccr7.2     | 4.90E-90   | 2.29287608 | 0.905 | 0.163 | 8.05E-86  | 16 |
| Tmtc2      | 7.60E-86   | 1.33283821 | 0.56  | 0.054 | 1.25E-81  | 16 |
| Relb       | 4.64E-85   | 1.67702369 | 0.69  | 0.088 | 7.63E-81  | 16 |
| Net1       | 4.93E-83   | 1.57987128 | 0.488 | 0.043 | 8.11E-79  | 16 |
| Serpnb6b.1 | 1.42E-81   | 1.7658077  | 0.488 | 0.044 | 2.34E-77  | 16 |

|           |          |            |       |       |          |    |
|-----------|----------|------------|-------|-------|----------|----|
| Bcl2a1a.1 | 3.09E-80 | 1.46975399 | 0.595 | 0.066 | 5.09E-76 | 16 |
| Spint2.1  | 2.26E-77 | 1.41120931 | 0.631 | 0.077 | 3.73E-73 | 16 |
| Cxcl16.1  | 4.63E-75 | 1.75811332 | 0.702 | 0.105 | 7.62E-71 | 16 |
| Tspan3    | 1.65E-74 | 1.84107227 | 0.643 | 0.086 | 2.72E-70 | 16 |
| Pfkfb3    | 1.40E-72 | 1.1693349  | 0.393 | 0.031 | 2.30E-68 | 16 |
| Birc2     | 4.07E-72 | 1.13024387 | 0.44  | 0.039 | 6.70E-68 | 16 |
| Samsn1.1  | 6.88E-70 | 1.39553715 | 0.655 | 0.091 | 1.13E-65 | 16 |
| Adam8     | 1.42E-67 | 1.22885741 | 0.464 | 0.047 | 2.33E-63 | 16 |
| Ccl5.2    | 3.52E-62 | 1.68917881 | 0.81  | 0.151 | 5.80E-58 | 16 |
| Bcl2a1b.4 | 3.92E-62 | 1.70244218 | 0.833 | 0.192 | 6.44E-58 | 16 |
| Nostrin   | 2.21E-61 | 1.11725585 | 0.298 | 0.021 | 3.64E-57 | 16 |
| Serpib9.1 | 8.93E-61 | 1.17290557 | 0.452 | 0.048 | 1.47E-56 | 16 |
| Avpi1.2   | 2.46E-58 | 1.39266127 | 0.607 | 0.092 | 4.05E-54 | 16 |
| Iscu.1    | 7.41E-58 | 1.59855216 | 0.81  | 0.185 | 1.22E-53 | 16 |
| Ccl17     | 1.64E-57 | 1.92676386 | 0.286 | 0.021 | 2.70E-53 | 16 |
| Mthfd2    | 1.23E-55 | 1.19532803 | 0.393 | 0.041 | 2.03E-51 | 16 |
| Bmp2k     | 9.32E-54 | 1.12039858 | 0.548 | 0.078 | 1.53E-49 | 16 |
| Tmem39a   | 2.70E-52 | 1.08804895 | 0.393 | 0.043 | 4.45E-48 | 16 |
| Fam49a    | 5.35E-52 | 1.22409085 | 0.429 | 0.051 | 8.80E-48 | 16 |
| Tbc1d8.1  | 1.60E-51 | 1.15472126 | 0.393 | 0.044 | 2.62E-47 | 16 |
| Fam60a    | 4.25E-51 | 0.97279576 | 0.298 | 0.025 | 6.99E-47 | 16 |
| Cpne2     | 1.17E-49 | 0.8490484  | 0.286 | 0.024 | 1.92E-45 | 16 |
| Lrrk1     | 1.19E-49 | 1.1892011  | 0.44  | 0.057 | 1.96E-45 | 16 |
| Pcgf5     | 5.22E-49 | 0.86959706 | 0.345 | 0.035 | 8.59E-45 | 16 |
| Bcl2a1d.4 | 4.60E-48 | 1.50784925 | 0.702 | 0.153 | 7.57E-44 | 16 |
| Id2.6     | 1.92E-47 | 1.5887174  | 0.786 | 0.208 | 3.16E-43 | 16 |
| Etv3.2    | 6.70E-47 | 1.37847549 | 0.738 | 0.173 | 1.10E-42 | 16 |
| Ly75      | 3.28E-46 | 1.06472786 | 0.286 | 0.026 | 5.39E-42 | 16 |
| Gyg       | 1.28E-45 | 1.58860296 | 0.393 | 0.049 | 2.11E-41 | 16 |
| Traf1.3   | 2.29E-45 | 1.54732988 | 0.643 | 0.139 | 3.77E-41 | 16 |
| Ube2l6    | 6.05E-44 | 1.03463656 | 0.321 | 0.034 | 9.94E-40 | 16 |
| Actn1     | 1.13E-43 | 0.97789232 | 0.393 | 0.05  | 1.85E-39 | 16 |
| Rgs1.1    | 3.60E-43 | 1.63499184 | 0.583 | 0.112 | 5.92E-39 | 16 |
| Glipr2    | 1.97E-42 | 1.15993545 | 0.44  | 0.065 | 3.24E-38 | 16 |
| Epsti1.1  | 3.29E-41 | 1.98541512 | 0.702 | 0.183 | 5.41E-37 | 16 |
| Csf2rb2   | 2.10E-40 | 0.90698971 | 0.286 | 0.029 | 3.46E-36 | 16 |
| Mxd1      | 6.18E-40 | 1.17449161 | 0.417 | 0.061 | 1.02E-35 | 16 |
| Tmsb4x.11 | 7.52E-38 | 0.96972814 | 1     | 0.993 | 1.24E-33 | 16 |
| Pgap2     | 1.81E-37 | 0.93782596 | 0.345 | 0.045 | 2.97E-33 | 16 |
| Foxp4     | 1.86E-37 | 0.79606435 | 0.286 | 0.031 | 3.06E-33 | 16 |
| Cd63.2    | 3.03E-37 | 1.1657892  | 0.786 | 0.205 | 4.99E-33 | 16 |
| Ggta1     | 3.05E-37 | 0.84558379 | 0.274 | 0.029 | 5.02E-33 | 16 |
| Arl5c     | 3.44E-36 | 1.10328461 | 0.405 | 0.065 | 5.65E-32 | 16 |

|            |          |            |       |       |          |    |
|------------|----------|------------|-------|-------|----------|----|
| Psm2.7     | 6.45E-36 | 1.46069226 | 0.821 | 0.329 | 1.06E-31 | 16 |
| Flt3.1     | 6.51E-36 | 0.90316769 | 0.31  | 0.038 | 1.07E-31 | 16 |
| Myo1g.3    | 7.77E-36 | 1.16816415 | 0.631 | 0.152 | 1.28E-31 | 16 |
| Lsp1.12    | 1.57E-35 | 1.3818187  | 0.893 | 0.391 | 2.59E-31 | 16 |
| Jak2       | 2.16E-35 | 1.13494014 | 0.452 | 0.08  | 3.56E-31 | 16 |
| Clic4.12   | 3.61E-35 | 1.33268359 | 0.774 | 0.246 | 5.94E-31 | 16 |
| Bhlhe40.5  | 1.02E-33 | 1.19774346 | 0.667 | 0.179 | 1.68E-29 | 16 |
| Map3k14    | 1.32E-33 | 0.93187626 | 0.345 | 0.05  | 2.17E-29 | 16 |
| Grasp.1    | 2.05E-33 | 1.06802953 | 0.369 | 0.056 | 3.38E-29 | 16 |
| Pmaip1.2   | 2.09E-33 | 1.01678586 | 0.488 | 0.096 | 3.44E-29 | 16 |
| Syng2.9    | 3.68E-33 | 1.34529983 | 0.738 | 0.243 | 6.05E-29 | 16 |
| Tmem131l   | 9.99E-33 | 0.82706953 | 0.381 | 0.06  | 1.64E-28 | 16 |
| Sdhaf1     | 1.37E-32 | 0.8263727  | 0.31  | 0.041 | 2.25E-28 | 16 |
| Actg1.9    | 5.15E-32 | 1.04188968 | 0.976 | 0.901 | 8.47E-28 | 16 |
| Nr4a3.2    | 1.03E-31 | 1.17955916 | 0.488 | 0.101 | 1.70E-27 | 16 |
| Htra2      | 1.83E-31 | 0.85203216 | 0.321 | 0.046 | 3.01E-27 | 16 |
| Csrp1.1    | 1.24E-30 | 0.93699886 | 0.381 | 0.065 | 2.05E-26 | 16 |
| Gadd45b.12 | 2.45E-30 | 1.24427604 | 0.738 | 0.246 | 4.03E-26 | 16 |
| Adora2a    | 2.86E-30 | 0.79977625 | 0.274 | 0.035 | 4.70E-26 | 16 |
| Uap1       | 1.13E-29 | 0.79655977 | 0.321 | 0.048 | 1.86E-25 | 16 |
| Map4k4     | 1.97E-28 | 1.03040501 | 0.5   | 0.113 | 3.25E-24 | 16 |
| Cdc42ep3   | 5.24E-28 | 0.83874382 | 0.321 | 0.05  | 8.61E-24 | 16 |
| Aebp2      | 5.82E-28 | 0.70808622 | 0.321 | 0.05  | 9.58E-24 | 16 |
| Csf2rb.2   | 9.88E-28 | 1.15685463 | 0.5   | 0.12  | 1.62E-23 | 16 |
| Ly6e.11    | 2.01E-27 | -2.0927554 | 0.131 | 0.757 | 3.31E-23 | 16 |
| Rnf115     | 2.78E-27 | 0.83349381 | 0.369 | 0.066 | 4.57E-23 | 16 |
| Gpr132.6   | 3.22E-27 | 0.94189831 | 0.702 | 0.219 | 5.30E-23 | 16 |
| Ogfrl1     | 5.05E-26 | 0.95639957 | 0.321 | 0.056 | 8.30E-22 | 16 |
| Actb.9     | 8.74E-26 | 0.88936786 | 1     | 0.993 | 1.44E-21 | 16 |
| Etv6       | 1.10E-25 | 0.90178725 | 0.429 | 0.093 | 1.82E-21 | 16 |
| Cblb       | 1.88E-25 | 0.90035638 | 0.405 | 0.083 | 3.10E-21 | 16 |
| Fam32a     | 1.91E-25 | 0.98719902 | 0.476 | 0.113 | 3.15E-21 | 16 |
| Gfpt1      | 6.49E-25 | 0.89046267 | 0.31  | 0.052 | 1.07E-20 | 16 |
| Spr        | 1.02E-24 | 0.66082424 | 0.333 | 0.059 | 1.67E-20 | 16 |
| Pik3r1.1   | 1.50E-24 | 0.99807108 | 0.512 | 0.131 | 2.47E-20 | 16 |
| Rel.11     | 2.77E-24 | 0.96223708 | 0.75  | 0.275 | 4.55E-20 | 16 |
| H2afz.15   | 5.45E-24 | 1.11012706 | 0.905 | 0.584 | 8.97E-20 | 16 |
| Marcks.13  | 1.61E-23 | 1.13724076 | 0.786 | 0.327 | 2.65E-19 | 16 |
| Casp3      | 2.66E-23 | 0.74112225 | 0.262 | 0.041 | 4.37E-19 | 16 |
| Il21r.2    | 3.05E-23 | 0.87325716 | 0.452 | 0.107 | 5.02E-19 | 16 |
| Cbfa2t3.3  | 6.40E-23 | 0.75261092 | 0.548 | 0.148 | 1.05E-18 | 16 |
| Atox1.15   | 1.27E-21 | 1.01050908 | 0.857 | 0.452 | 2.09E-17 | 16 |
| Hivep1     | 2.47E-21 | 0.84811996 | 0.262 | 0.044 | 4.07E-17 | 16 |

|             |          |            |       |       |          |    |
|-------------|----------|------------|-------|-------|----------|----|
| Psmc1.8     | 2.82E-21 | 0.99574368 | 0.81  | 0.4   | 4.63E-17 | 16 |
| Tmem176a.11 | 4.01E-21 | 0.96303236 | 0.762 | 0.329 | 6.59E-17 | 16 |
| Batf3.2     | 5.32E-21 | 0.81226668 | 0.417 | 0.102 | 8.76E-17 | 16 |
| Calm1.6     | 1.08E-20 | 1.05442871 | 0.94  | 0.714 | 1.78E-16 | 16 |
| Gpr137b     | 1.53E-20 | 0.74618068 | 0.274 | 0.049 | 2.51E-16 | 16 |
| Mkl1        | 1.99E-20 | 0.71816341 | 0.333 | 0.069 | 3.27E-16 | 16 |
| Cd40        | 2.45E-20 | 0.62805677 | 0.31  | 0.06  | 4.03E-16 | 16 |
| Lactb       | 2.47E-20 | 0.82334046 | 0.369 | 0.084 | 4.07E-16 | 16 |
| Dpp4        | 8.87E-20 | 0.75103934 | 0.262 | 0.047 | 1.46E-15 | 16 |
| Ccdc88a.1   | 1.29E-19 | 0.90758102 | 0.405 | 0.102 | 2.12E-15 | 16 |
| B2m.10      | 1.39E-19 | 0.76147323 | 0.964 | 0.806 | 2.29E-15 | 16 |
| Arhgap31    | 1.47E-19 | 1.19093043 | 0.381 | 0.096 | 2.42E-15 | 16 |
| Fam129a.1   | 1.50E-19 | 0.78544126 | 0.393 | 0.095 | 2.47E-15 | 16 |
| Cd44.4      | 9.00E-19 | 0.86154613 | 0.56  | 0.189 | 1.48E-14 | 16 |
| Ktn1        | 9.42E-19 | 0.65176286 | 0.274 | 0.052 | 1.55E-14 | 16 |
| Crip1.14    | 1.25E-18 | 0.83838985 | 0.964 | 0.718 | 2.06E-14 | 16 |
| Rftn1       | 1.29E-18 | 0.627864   | 0.333 | 0.073 | 2.12E-14 | 16 |
| Psmb8.7     | 1.71E-18 | 0.88333224 | 0.833 | 0.476 | 2.81E-14 | 16 |
| Selplg.9    | 1.75E-18 | 0.93407158 | 0.679 | 0.302 | 2.88E-14 | 16 |
| Rap2b       | 3.16E-18 | 0.69066396 | 0.31  | 0.066 | 5.20E-14 | 16 |
| Traf6       | 5.51E-18 | 0.65960459 | 0.31  | 0.066 | 9.06E-14 | 16 |
| Marcksl1.13 | 2.05E-17 | 0.80952071 | 0.857 | 0.431 | 3.37E-13 | 16 |
| Cst3.13     | 4.20E-17 | 0.99198156 | 0.952 | 0.682 | 6.90E-13 | 16 |
| Grk3        | 5.52E-17 | 0.72639089 | 0.262 | 0.053 | 9.08E-13 | 16 |
| Ptpn18.6    | 1.08E-16 | -1.4378411 | 0.19  | 0.618 | 1.78E-12 | 16 |
| Lyz2.15     | 2.19E-16 | -2.9923009 | 0.107 | 0.559 | 3.60E-12 | 16 |
| Anxa4       | 2.26E-16 | 0.66284554 | 0.31  | 0.071 | 3.72E-12 | 16 |
| Fth1.13     | 3.17E-16 | -0.9442252 | 0.905 | 0.958 | 5.21E-12 | 16 |
| Nudt9       | 3.60E-16 | 0.77393603 | 0.298 | 0.068 | 5.92E-12 | 16 |
| Txndc17     | 4.10E-16 | 0.88291987 | 0.548 | 0.196 | 6.74E-12 | 16 |
| Arl4c       | 7.77E-16 | 0.58736833 | 0.381 | 0.1   | 1.28E-11 | 16 |
| Phf11b.1    | 1.21E-15 | 0.66160404 | 0.31  | 0.075 | 1.99E-11 | 16 |
| Npc2.12     | 1.30E-15 | 1.03024269 | 0.81  | 0.509 | 2.14E-11 | 16 |
| Prex1.1     | 1.32E-15 | 0.67729847 | 0.476 | 0.15  | 2.17E-11 | 16 |
| Tmem176b.12 | 4.87E-15 | 0.70586115 | 0.821 | 0.435 | 8.02E-11 | 16 |
| Nrp2        | 5.70E-15 | 0.59039518 | 0.274 | 0.061 | 9.37E-11 | 16 |
| Rpsa.10     | 5.83E-15 | 0.6249286  | 0.988 | 0.934 | 9.58E-11 | 16 |
| Lima1       | 1.10E-14 | 0.7383134  | 0.274 | 0.063 | 1.80E-10 | 16 |
| Apoe.14     | 1.98E-14 | -3.0584455 | 0.036 | 0.475 | 3.25E-10 | 16 |
| Dusp5.7     | 2.13E-14 | 0.78139379 | 0.571 | 0.226 | 3.50E-10 | 16 |
| Rps27l.8    | 2.63E-14 | 0.92556433 | 0.643 | 0.304 | 4.33E-10 | 16 |
| Jund.11     | 3.45E-14 | -0.9917517 | 0.321 | 0.686 | 5.68E-10 | 16 |
| Cnn2.7      | 3.60E-14 | 0.83471581 | 0.69  | 0.344 | 5.93E-10 | 16 |

|             |           |            |       |       |          |    |
|-------------|-----------|------------|-------|-------|----------|----|
| Mob3a       | 4.45E-14  | 0.5164784  | 0.286 | 0.068 | 7.32E-10 | 16 |
| Swap70.2    | 4.47E-14  | 0.69026744 | 0.429 | 0.136 | 7.36E-10 | 16 |
| Rnf19b      | 4.85E-14  | 0.79853895 | 0.345 | 0.097 | 7.98E-10 | 16 |
| Trafd1      | 7.13E-14  | 0.53453308 | 0.333 | 0.089 | 1.17E-09 | 16 |
| Nfkbia.12   | 1.14E-13  | 0.98241589 | 0.845 | 0.517 | 1.87E-09 | 16 |
| Mvp         | 1.16E-13  | 0.73080719 | 0.333 | 0.095 | 1.91E-09 | 16 |
| S100a11.10  | 1.26E-13  | 0.72727512 | 0.75  | 0.394 | 2.08E-09 | 16 |
| Tank        | 1.48E-13  | 0.60067751 | 0.262 | 0.062 | 2.44E-09 | 16 |
| Btg1.10     | 3.10E-13  | 0.61564724 | 0.869 | 0.57  | 5.10E-09 | 16 |
| Malat1.9    | 4.49E-13  | 1.05641899 | 0.94  | 0.936 | 7.38E-09 | 16 |
| Nav1        | 9.06E-13  | 0.66613841 | 0.333 | 0.097 | 1.49E-08 | 16 |
| Itgb1.3     | 1.85E-12  | 0.72546086 | 0.583 | 0.241 | 3.05E-08 | 16 |
| Herpud1.3   | 2.05E-12  | 0.82077432 | 0.476 | 0.183 | 3.36E-08 | 16 |
| AW112010.11 | 2.30E-12  | 0.87071566 | 0.56  | 0.258 | 3.78E-08 | 16 |
| Gtpbp4      | 2.68E-12  | 0.64703204 | 0.31  | 0.089 | 4.41E-08 | 16 |
| S100a4.6    | 2.78E-12  | 0.55658229 | 0.488 | 0.178 | 4.58E-08 | 16 |
| Rassf2      | 3.15E-12  | 0.53622706 | 0.31  | 0.086 | 5.18E-08 | 16 |
| Ncoa7.1     | 3.33E-12  | 0.75924049 | 0.31  | 0.091 | 5.47E-08 | 16 |
| Ptms.12     | 6.22E-12  | 0.68306186 | 0.631 | 0.284 | 1.02E-07 | 16 |
| Selenop.15  | 6.82E-12  | -2.7349025 | 0.048 | 0.42  | 1.12E-07 | 16 |
| H2-DMa.2    | 8.09E-57  | -1.0562918 | 0.144 | 0.453 | 1.33E-52 | 4  |
| Rabgap1l.1  | 1.09E-11  | 0.54276922 | 0.298 | 0.083 | 1.79E-07 | 16 |
| Tap1.1      | 1.38E-11  | 0.7204048  | 0.393 | 0.139 | 2.28E-07 | 16 |
| Cd83.12     | 1.63E-11  | 0.74728413 | 0.774 | 0.467 | 2.68E-07 | 16 |
| Sri.5       | 1.70E-11  | 0.61540431 | 0.571 | 0.249 | 2.80E-07 | 16 |
| Tes.1       | 1.72E-11  | 0.58835148 | 0.333 | 0.103 | 2.83E-07 | 16 |
| H2-Eb1.14   | 0.0062134 | -1.0833114 | 0.75  | 0.708 | 1        | 20 |
| Clec2d.1    | 1.88E-11  | 0.57606496 | 0.488 | 0.181 | 3.09E-07 | 16 |
| Apobec3.3   | 3.53E-11  | 0.61124407 | 0.488 | 0.19  | 5.81E-07 | 16 |
| Ctsz.9      | 4.54E-11  | 0.72596457 | 0.679 | 0.349 | 7.47E-07 | 16 |
| Rps19.9     | 4.74E-11  | 0.46663287 | 0.988 | 0.932 | 7.80E-07 | 16 |
| Anxa2.15    | 5.09E-11  | 0.7150904  | 0.607 | 0.272 | 8.38E-07 | 16 |
| Ikbkb.2     | 5.50E-11  | 0.52810182 | 0.393 | 0.136 | 9.04E-07 | 16 |
| Bri3bp.2    | 5.67E-11  | 0.509203   | 0.369 | 0.123 | 9.33E-07 | 16 |
| Mrpl14      | 6.03E-11  | 0.55227914 | 0.381 | 0.131 | 9.92E-07 | 16 |
| Pbxip1      | 8.54E-11  | 0.50445613 | 0.31  | 0.094 | 1.40E-06 | 16 |
| Zfp36l1.11  | 9.18E-11  | 0.60133129 | 0.821 | 0.525 | 1.51E-06 | 16 |
| Cdkn1a.5    | 9.55E-11  | 0.71646585 | 0.524 | 0.228 | 1.57E-06 | 16 |
| H2-DMb2.4   | 7.76E-20  | -1.0856145 | 0.07  | 0.253 | 1.28E-15 | 5  |
| Psmg4       | 1.18E-10  | 0.72773339 | 0.31  | 0.1   | 1.95E-06 | 16 |
| Dynll2      | 1.34E-10  | 0.66608563 | 0.321 | 0.104 | 2.20E-06 | 16 |
| Malt1.2     | 1.35E-10  | 0.72276828 | 0.369 | 0.129 | 2.23E-06 | 16 |
| C1qb.15     | 1.39E-10  | -2.7253871 | 0.012 | 0.356 | 2.29E-06 | 16 |

|            |          |            |       |       |            |    |
|------------|----------|------------|-------|-------|------------|----|
| Fos.11     | 2.46E-10 | -1.5221516 | 0.393 | 0.623 | 4.05E-06   | 16 |
| Brk1.1     | 2.61E-10 | 0.68471809 | 0.571 | 0.259 | 4.29E-06   | 16 |
| Psemb9.5   | 4.92E-10 | 0.59757099 | 0.536 | 0.239 | 8.09E-06   | 16 |
| Cd47.2     | 5.45E-10 | 0.59945045 | 0.655 | 0.346 | 8.97E-06   | 16 |
| Asap1.1    | 5.68E-10 | 0.60415184 | 0.369 | 0.133 | 9.35E-06   | 16 |
| Tuba1c.1   | 5.72E-10 | 0.64238312 | 0.452 | 0.178 | 9.41E-06   | 16 |
| Alox5ap.15 | 5.81E-10 | -1.4661743 | 0.071 | 0.401 | 9.55E-06   | 16 |
| Myl6.7     | 5.88E-10 | 0.54258897 | 0.881 | 0.651 | 9.67E-06   | 16 |
| Fosb.11    | 6.04E-10 | -1.3265254 | 0.179 | 0.505 | 9.93E-06   | 16 |
| Stk4.2     | 6.23E-10 | 0.53717823 | 0.417 | 0.16  | 1.03E-05   | 16 |
| Csf1r.15   | 6.81E-10 | -1.8329026 | 0.012 | 0.336 | 1.12E-05   | 16 |
| Rhog.4     | 7.82E-10 | 0.68349121 | 0.583 | 0.289 | 1.29E-05   | 16 |
| Edf1.2     | 8.19E-10 | 0.59629826 | 0.643 | 0.346 | 1.35E-05   | 16 |
| Birc3      | 9.55E-10 | 0.71478247 | 0.417 | 0.169 | 1.57E-05   | 16 |
| Ccl6.15    | 1.04E-09 | -1.7871667 | 0.095 | 0.416 | 1.70E-05   | 16 |
| Cytip.9    | 1.24E-09 | 0.6468593  | 0.619 | 0.324 | 2.04E-05   | 16 |
| Nfkb2      | 1.34E-09 | 0.51124574 | 0.298 | 0.096 | 2.21E-05   | 16 |
| Zfand6     | 1.37E-09 | 0.51825803 | 0.357 | 0.127 | 2.26E-05   | 16 |
| Itm2c.2    | 1.43E-09 | 0.7203987  | 0.464 | 0.207 | 2.35E-05   | 16 |
| Egr1.13    | 1.43E-09 | -1.9157507 | 0.167 | 0.461 | 2.36E-05   | 16 |
| Ier2.13    | 1.48E-09 | -1.1485305 | 0.25  | 0.559 | 2.43E-05   | 16 |
| C1qa.15    | 2.40E-09 | -2.5233874 | 0.024 | 0.333 | 3.95E-05   | 16 |
| Rala.2     | 2.49E-09 | 0.49772681 | 0.44  | 0.18  | 4.10E-05   | 16 |
| Gmfg.2     | 2.56E-09 | -1.2517562 | 0.036 | 0.346 | 4.22E-05   | 16 |
| Rac2.13    | 2.68E-09 | -1.1769936 | 0.19  | 0.484 | 4.40E-05   | 16 |
| Supt4a     | 3.03E-09 | 0.60572365 | 0.452 | 0.192 | 4.98E-05   | 16 |
| Trim35.1   | 4.64E-09 | 0.37830466 | 0.286 | 0.091 | 7.64E-05   | 16 |
| Nfkbie     | 5.08E-09 | 0.4854015  | 0.31  | 0.106 | 8.36E-05   | 16 |
| Mrc1.15    | 6.54E-09 | -1.7613729 | 0.012 | 0.309 | 0.00010763 | 16 |
| Ctsc.13    | 7.10E-09 | -1.4127829 | 0.119 | 0.418 | 0.00011679 | 16 |
| Smarce1    | 9.56E-09 | 0.47597894 | 0.286 | 0.095 | 0.0001572  | 16 |
| Sbno1      | 1.11E-08 | 0.41779474 | 0.345 | 0.125 | 0.00018266 | 16 |
| C1qc.15    | 1.18E-08 | -2.4469835 | 0.048 | 0.337 | 0.00019491 | 16 |
| Vim.13     | 1.34E-08 | 0.64301681 | 0.845 | 0.62  | 0.00022034 | 16 |
| Wnk1.6     | 1.47E-08 | 0.6994247  | 0.512 | 0.257 | 0.00024224 | 16 |
| Jun.14     | 1.49E-08 | -1.7594398 | 0.19  | 0.465 | 0.00024508 | 16 |
| Wdr1.1     | 1.65E-08 | 0.56192273 | 0.536 | 0.259 | 0.00027133 | 16 |
| H2-DMb1.12 | 1.06E-07 | -1.1052355 | 0.109 | 0.331 | 0.00173644 | 14 |
| Pltp.15    | 1.72E-08 | -1.5991641 | 0.048 | 0.34  | 0.00028304 | 16 |
| Tnfrsf1b.2 | 1.83E-08 | 0.48070584 | 0.321 | 0.113 | 0.00030096 | 16 |
| Cfp.14     | 1.90E-08 | -1.3121081 | 0.024 | 0.315 | 0.00031203 | 16 |
| Dstn       | 2.56E-08 | 0.55517904 | 0.345 | 0.134 | 0.0004209  | 16 |
| Cebpb.14   | 2.57E-08 | -1.4426965 | 0.048 | 0.332 | 0.00042204 | 16 |

|           |          |            |       |       |            |    |
|-----------|----------|------------|-------|-------|------------|----|
| Stk17b.9  | 2.67E-08 | -1.216078  | 0.167 | 0.44  | 0.00043877 | 16 |
| Ostf1.5   | 3.02E-08 | 0.64891345 | 0.583 | 0.311 | 0.00049739 | 16 |
| Slc6a6.2  | 3.09E-08 | 0.55405367 | 0.429 | 0.184 | 0.00050814 | 16 |
| mt-Cytb.5 | 3.28E-08 | -0.4139019 | 0.881 | 0.937 | 0.00053901 | 16 |
| Klf4.12   | 4.41E-08 | -1.4073906 | 0.083 | 0.378 | 0.00072612 | 16 |
| Shisa5.11 | 5.34E-08 | -1.0801918 | 0.19  | 0.454 | 0.00087881 | 16 |
| Ctnna1.1  | 5.42E-08 | 0.50562923 | 0.298 | 0.108 | 0.00089203 | 16 |
| Sqstm1.6  | 6.91E-08 | 0.64187849 | 0.655 | 0.379 | 0.0011373  | 16 |
| lfitm3.14 | 7.35E-08 | -1.4686    | 0.274 | 0.493 | 0.00120844 | 16 |
| Pde4b.11  | 7.45E-08 | 0.49816742 | 0.69  | 0.415 | 0.00122566 | 16 |
| ltga4.4   | 7.58E-08 | 0.62893477 | 0.452 | 0.21  | 0.00124762 | 16 |
| Myo9b     | 8.42E-08 | 0.45460826 | 0.298 | 0.108 | 0.00138427 | 16 |
| Slamf7.3  | 9.11E-08 | 0.53458024 | 0.321 | 0.125 | 0.00149925 | 16 |
| St8sia4   | 9.13E-08 | 0.53960901 | 0.321 | 0.124 | 0.00150197 | 16 |
| Nrip1.2   | 9.14E-08 | 0.40257656 | 0.298 | 0.108 | 0.0015036  | 16 |
| lghm.12   | 9.31E-08 | -1.8507121 | 0.155 | 0.417 | 0.00153079 | 16 |
| Zfp36l2.6 | 1.27E-07 | -1.0574337 | 0.107 | 0.383 | 0.00209692 | 16 |
| Rab8b     | 1.40E-07 | 0.61660742 | 0.298 | 0.11  | 0.00230488 | 16 |
| Arf4.2    | 1.62E-07 | 0.51511914 | 0.464 | 0.22  | 0.00266974 | 16 |
| Nfkbib    | 1.67E-07 | 0.35477652 | 0.321 | 0.121 | 0.0027409  | 16 |
| Mafb.14   | 1.73E-07 | -1.743702  | 0.012 | 0.266 | 0.00284883 | 16 |
| Unc93b1.7 | 1.77E-07 | -1.0357261 | 0.226 | 0.465 | 0.0029043  | 16 |
| Nfil3.2   | 1.78E-07 | 0.55314555 | 0.286 | 0.105 | 0.00292254 | 16 |
| Klf2.13   | 1.83E-07 | -0.9373336 | 0.357 | 0.597 | 0.0030151  | 16 |
| Tubb2a.1  | 2.13E-07 | 0.54545412 | 0.274 | 0.099 | 0.00350468 | 16 |
| Cd14.15   | 2.15E-07 | -1.5083167 | 0.012 | 0.263 | 0.00354238 | 16 |
| Ccl2.15   | 2.21E-07 | -1.8447778 | 0.024 | 0.284 | 0.00363583 | 16 |
| Cd53.2    | 2.21E-07 | -0.9479242 | 0.048 | 0.319 | 0.00363772 | 16 |
| Atpif1.14 | 2.24E-07 | 0.52663493 | 0.583 | 0.312 | 0.00367779 | 16 |
| Fcgr2b.9  | 2.43E-07 | -1.0911553 | 0.024 | 0.281 | 0.00400472 | 16 |
| Coro1b.3  | 2.78E-07 | 0.4421228  | 0.488 | 0.242 | 0.00457155 | 16 |
| Fnbp1.2   | 3.04E-07 | 0.4475352  | 0.476 | 0.224 | 0.00500655 | 16 |
| F13a1.14  | 3.10E-07 | -1.4238523 | 0.024 | 0.282 | 0.00509579 | 16 |
| Pf4.16    | 4.93E-07 | -1.9509878 | 0.06  | 0.309 | 0.00811101 | 16 |
| Srgn.7    | 6.55E-07 | 0.47448839 | 0.845 | 0.671 | 0.01076762 | 16 |
| ltn2b.13  | 8.40E-07 | -0.8388347 | 0.738 | 0.788 | 0.01381682 | 16 |
| Snx20.3   | 8.76E-07 | 0.50826237 | 0.369 | 0.164 | 0.0144067  | 16 |
| Sec61b.8  | 9.62E-07 | 0.6267928  | 0.714 | 0.48  | 0.01582303 | 16 |
| Uvrag.2   | 9.76E-07 | 0.49891614 | 0.381 | 0.17  | 0.01605256 | 16 |
| lfng1.10  | 1.01E-06 | -1.0746891 | 0.143 | 0.385 | 0.01662205 | 16 |
| Serp1.8   | 1.08E-06 | -0.9350236 | 0.131 | 0.379 | 0.0178079  | 16 |
| Txn1.7    | 1.09E-06 | 0.53598487 | 0.5   | 0.248 | 0.0178787  | 16 |
| Ctsd.13   | 1.27E-06 | -1.2238303 | 0.06  | 0.293 | 0.02095317 | 16 |

|             |          |            |       |       |            |    |
|-------------|----------|------------|-------|-------|------------|----|
| mt-Nd2.7    | 1.30E-06 | -0.4763082 | 0.655 | 0.799 | 0.02135635 | 16 |
| Dusp2.1     | 1.36E-06 | 0.57417819 | 0.333 | 0.146 | 0.02236115 | 16 |
| Kxd1        | 1.37E-06 | 0.53261384 | 0.298 | 0.123 | 0.02256304 | 16 |
| Tap2        | 1.38E-06 | 0.41264226 | 0.333 | 0.139 | 0.02264586 | 16 |
| Got1        | 1.42E-06 | 0.4760393  | 0.262 | 0.101 | 0.02334514 | 16 |
| Fxyd5.15    | 1.47E-06 | -0.9015683 | 0.226 | 0.468 | 0.02414396 | 16 |
| Ifi2712a.13 | 1.52E-06 | -1.2788791 | 0.167 | 0.405 | 0.02493471 | 16 |
| Cybb.11     | 1.69E-06 | -1.0800262 | 0.095 | 0.332 | 0.02774351 | 16 |
| Cflar       | 2.22E-06 | 0.4894132  | 0.274 | 0.109 | 0.03645428 | 16 |
| Serinc3.12  | 2.22E-06 | -0.9916568 | 0.119 | 0.36  | 0.03648559 | 16 |
| Rps26.10    | 2.25E-06 | 0.33248773 | 0.976 | 0.934 | 0.03697118 | 16 |
| Stat1.3     | 2.28E-06 | 0.46893978 | 0.369 | 0.169 | 0.03754511 | 16 |
| Smchd1.1    | 2.35E-06 | 0.51509473 | 0.31  | 0.134 | 0.03871388 | 16 |
| Fcer1g.13   | 2.36E-06 | -1.0852434 | 0.5   | 0.578 | 0.03883093 | 16 |
| Grn.12      | 2.40E-06 | -1.1756107 | 0.155 | 0.379 | 0.03946324 | 16 |
| Wfdc17.13   | 2.41E-06 | -1.260606  | 0.095 | 0.332 | 0.03963367 | 16 |
| Hsp90b1.6   | 2.51E-06 | -0.8262354 | 0.238 | 0.478 | 0.04136868 | 16 |
| Rbm17.1     | 2.90E-06 | 0.43324931 | 0.274 | 0.111 | 0.0477545  | 16 |
| Skil.1      | 2.93E-06 | 0.46107015 | 0.298 | 0.126 | 0.04813576 | 16 |
| Arhgap30.1  | 3.08E-06 | 0.46464599 | 0.393 | 0.186 | 0.05062042 | 16 |
| Rtraf.2     | 3.42E-06 | 0.36910504 | 0.512 | 0.264 | 0.05623747 | 16 |
| Sub1.9      | 3.50E-06 | 0.4349308  | 0.726 | 0.461 | 0.05752934 | 16 |
| Vcp.2       | 4.34E-06 | 0.48844844 | 0.488 | 0.258 | 0.07134157 | 16 |
| Arhgdib.9   | 4.54E-06 | -0.6901872 | 0.405 | 0.598 | 0.0746403  | 16 |
| Icam1.3     | 4.81E-06 | 0.52130542 | 0.369 | 0.174 | 0.07909002 | 16 |
| Vamp8.10    | 5.20E-06 | 0.39739933 | 0.607 | 0.339 | 0.0856038  | 16 |
| Pim1.8      | 5.31E-06 | 0.40636135 | 0.702 | 0.447 | 0.08728093 | 16 |
| Cyba.7      | 5.55E-06 | 0.39355724 | 0.893 | 0.716 | 0.09125746 | 16 |
| Cd79a.14    | 5.61E-06 | -1.5477636 | 0.036 | 0.254 | 0.09221001 | 16 |
| Sh3glb1.3   | 5.75E-06 | 0.38447962 | 0.607 | 0.349 | 0.09459911 | 16 |
| Hint1.2     | 6.48E-06 | -0.7688197 | 0.25  | 0.462 | 0.10666061 | 16 |
| Tubb5.4     | 7.08E-06 | 0.43258966 | 0.536 | 0.294 | 0.11650926 | 16 |
| Ak2         | 8.33E-06 | 0.50155902 | 0.262 | 0.109 | 0.13698765 | 16 |
| Psmb10.1    | 9.06E-06 | 0.4843041  | 0.393 | 0.194 | 0.14895164 | 16 |
| B4galnt1.3  | 9.16E-06 | 0.32923137 | 0.345 | 0.154 | 0.15065441 | 16 |
| Lamp1.14    | 9.60E-06 | 0.35732385 | 0.69  | 0.411 | 0.15798088 | 16 |
| Dap         | 1.03E-05 | 0.60057372 | 0.262 | 0.114 | 0.17010944 | 16 |
| mt-Atp8.12  | 1.09E-05 | -0.3559221 | 0.917 | 0.929 | 0.17871229 | 16 |
| Ccni        | 1.14E-05 | 0.37969439 | 0.262 | 0.107 | 0.18769986 | 16 |
| Man2b1.11   | 1.18E-05 | -0.840619  | 0.083 | 0.301 | 0.19490046 | 16 |
| Pirb.1      | 1.21E-05 | 0.40796139 | 0.298 | 0.129 | 0.19944689 | 16 |
| Cstb.9      | 1.23E-05 | 0.46353103 | 0.464 | 0.255 | 0.20178879 | 16 |
| Skap2.1     | 1.24E-05 | 0.26668719 | 0.286 | 0.118 | 0.20428198 | 16 |



|            |          |            |       |       |            |    |
|------------|----------|------------|-------|-------|------------|----|
| Spop       | 1.27E-05 | 0.29488518 | 0.286 | 0.121 | 0.20840634 | 16 |
| H3f3a.10   | 1.29E-05 | 0.38653408 | 0.869 | 0.737 | 0.21274928 | 16 |
| Ywhah.6    | 1.32E-05 | 0.31295075 | 0.5   | 0.261 | 0.21666332 | 16 |
| Arpc4.5    | 1.49E-05 | 0.37212166 | 0.607 | 0.34  | 0.24527416 | 16 |
| Scand1.3   | 1.53E-05 | 0.43894494 | 0.571 | 0.334 | 0.2517371  | 16 |
| H2-DMb2.6  | 2.09E-24 | -1.2012283 | 0.026 | 0.254 | 3.44E-20   | 7  |
| Krcc1      | 1.63E-05 | 0.37798126 | 0.298 | 0.13  | 0.26858781 | 16 |
| Hsp90ab1.3 | 1.66E-05 | 0.3419786  | 0.964 | 0.804 | 0.27227048 | 16 |
| Ahnak.10   | 1.68E-05 | -0.8688449 | 0.393 | 0.548 | 0.27566745 | 16 |
| Atp6v0e.1  | 1.68E-05 | 0.36334164 | 0.631 | 0.386 | 0.27616798 | 16 |
| Junb.12    | 1.70E-05 | -0.526834  | 0.905 | 0.842 | 0.2792376  | 16 |
| Krtcap2.4  | 1.89E-05 | -0.794049  | 0.083 | 0.299 | 0.31054311 | 16 |
| Efhhd2.12  | 2.08E-05 | 0.37416657 | 0.524 | 0.293 | 0.34155153 | 16 |
| Dock8      | 2.13E-05 | 0.49180678 | 0.357 | 0.177 | 0.35116357 | 16 |
| Ctsb.15    | 2.26E-05 | -1.3064891 | 0.333 | 0.478 | 0.37098916 | 16 |
| Tagln2.11  | 2.26E-05 | 0.51705473 | 0.69  | 0.488 | 0.37164566 | 16 |
| Fcgrt.14   | 2.51E-05 | -1.0247377 | 0.06  | 0.259 | 0.41216179 | 16 |
| Ly6d.13    | 2.56E-05 | -1.2697737 | 0.107 | 0.31  | 0.42093766 | 16 |
| Ctsh.12    | 2.57E-05 | 0.3950471  | 0.619 | 0.383 | 0.42314956 | 16 |
| Aup1.1     | 2.93E-05 | 0.28647526 | 0.429 | 0.213 | 0.48244932 | 16 |
| Ptprcap.14 | 3.09E-05 | -1.0393833 | 0.071 | 0.267 | 0.50754884 | 16 |
| M6pr.1     | 3.12E-05 | 0.3783527  | 0.357 | 0.176 | 0.51322176 | 16 |
| Ly86.10    | 3.35E-05 | -0.8227083 | 0.119 | 0.32  | 0.55099227 | 16 |
| Myh9.9     | 3.54E-05 | 0.35882625 | 0.714 | 0.5   | 0.58151069 | 16 |
| Scpep1     | 3.68E-05 | 0.37795557 | 0.298 | 0.135 | 0.60505534 | 16 |
| Pld4.11    | 3.83E-05 | -0.7671658 | 0.119 | 0.328 | 0.63010737 | 16 |
| Psma5      | 3.88E-05 | 0.29237077 | 0.286 | 0.125 | 0.63857381 | 16 |
| H2-DMb2.7  | 1.39E-19 | -1.2293095 | 0.017 | 0.251 | 2.29E-15   | 10 |
| Irf1.1     | 4.06E-05 | 0.35443141 | 0.369 | 0.183 | 0.66850932 | 16 |
| Hspa5.3    | 4.14E-05 | -0.8001993 | 0.31  | 0.465 | 0.68030054 | 16 |
| Tspo.8     | 4.30E-05 | 0.42507926 | 0.643 | 0.421 | 0.70812489 | 16 |
| Chchd2.1   | 4.62E-05 | 0.3453922  | 0.857 | 0.623 | 0.75940467 | 16 |
| Snx5.13    | 5.59E-05 | -0.766853  | 0.119 | 0.319 | 0.91974983 | 16 |
| Taok3.2    | 5.65E-05 | 0.40526481 | 0.381 | 0.201 | 0.92912592 | 16 |
| mt-Nd1.4   | 5.82E-05 | -0.3459134 | 0.869 | 0.868 | 0.95658895 | 16 |
| H2-DMb1.3  | 4.15E-54 | -1.2474065 | 0.066 | 0.353 | 6.82E-50   | 4  |
| Capg.10    | 6.15E-05 | -0.8634203 | 0.071 | 0.26  | 1          | 16 |
| Rpl7a.4    | 6.61E-05 | 0.29416772 | 0.905 | 0.761 | 1          | 16 |
| Pfn1.7     | 6.68E-05 | 0.30401196 | 0.905 | 0.859 | 1          | 16 |
| Cxcl2.14   | 6.69E-05 | -1.8430956 | 0.071 | 0.252 | 1          | 16 |
| Ldha.8     | 7.33E-05 | -0.8102754 | 0.155 | 0.341 | 1          | 16 |
| Eloc       | 7.34E-05 | 0.36566147 | 0.333 | 0.163 | 1          | 16 |
| Ehd1.2     | 8.09E-05 | 0.3354459  | 0.381 | 0.192 | 1          | 16 |

|             |            |            |       |       |   |    |
|-------------|------------|------------|-------|-------|---|----|
| Ghitm.1     | 9.29E-05   | 0.38410678 | 0.298 | 0.144 | 1 | 16 |
| Mbnl1.5     | 9.48E-05   | -0.7471959 | 0.155 | 0.342 | 1 | 16 |
| Tapbp       | 9.53E-05   | 0.4079744  | 0.44  | 0.241 | 1 | 16 |
| Srsf3.1     | 9.68E-05   | 0.45499169 | 0.44  | 0.247 | 1 | 16 |
| Rgs10.11    | 9.82E-05   | 0.44360372 | 0.464 | 0.273 | 1 | 16 |
| Ehd4.13     | 9.89E-05   | -0.7701084 | 0.083 | 0.269 | 1 | 16 |
| Peli1.1     | 0.00013127 | 0.32877713 | 0.286 | 0.135 | 1 | 16 |
| Zfp706.2    | 0.00013171 | -0.7612194 | 0.155 | 0.325 | 1 | 16 |
| Rpl13a.11   | 0.00013198 | -0.448088  | 0.774 | 0.814 | 1 | 16 |
| Ier3.12     | 0.00013946 | -1.1954909 | 0.155 | 0.327 | 1 | 16 |
| Cd37.11     | 0.00014416 | -0.8548888 | 0.143 | 0.332 | 1 | 16 |
| Necap2      | 0.00014595 | 0.29367221 | 0.274 | 0.127 | 1 | 16 |
| Prkcd.2     | 0.0001484  | 0.361554   | 0.345 | 0.182 | 1 | 16 |
| Cdk2ap2.8   | 0.00017171 | -0.8321405 | 0.095 | 0.267 | 1 | 16 |
| Tpm4.5      | 0.00018044 | 0.30359193 | 0.44  | 0.242 | 1 | 16 |
| Slc38a2     | 0.00018321 | 0.3767171  | 0.286 | 0.136 | 1 | 16 |
| Cdc42se1    | 0.00018875 | 0.37926651 | 0.345 | 0.183 | 1 | 16 |
| Tnfaip8.3   | 0.00018992 | 0.38062469 | 0.345 | 0.183 | 1 | 16 |
| Ctsa.13     | 0.00019024 | -0.8368597 | 0.119 | 0.286 | 1 | 16 |
| Hexa.12     | 0.0001968  | -0.8358906 | 0.119 | 0.293 | 1 | 16 |
| Nr4a1.9     | 0.00019936 | -0.4617562 | 0.321 | 0.507 | 1 | 16 |
| Abrac1.7    | 0.00020661 | 0.33810447 | 0.452 | 0.259 | 1 | 16 |
| Scamp2.2    | 0.00021245 | 0.36696401 | 0.381 | 0.208 | 1 | 16 |
| Btg2.10     | 0.00022235 | -0.5718159 | 0.619 | 0.671 | 1 | 16 |
| Rplp1.4     | 0.00022266 | -0.2616975 | 0.976 | 0.973 | 1 | 16 |
| Selenok.1   | 0.00023983 | 0.37603533 | 0.56  | 0.36  | 1 | 16 |
| Sh3bgrl3.9  | 0.0002669  | 0.28454062 | 0.905 | 0.746 | 1 | 16 |
| Ier5.11     | 0.00027005 | 0.30011881 | 0.583 | 0.369 | 1 | 16 |
| S100a10.14  | 0.00027266 | -0.7003063 | 0.298 | 0.462 | 1 | 16 |
| Nap1l1.6    | 0.00027984 | 0.29496937 | 0.452 | 0.259 | 1 | 16 |
| Hspa8.4     | 0.00028668 | 0.30517586 | 0.881 | 0.723 | 1 | 16 |
| Ccdc50      | 0.00029716 | 0.25395596 | 0.321 | 0.159 | 1 | 16 |
| Gstm1.13    | 0.00033709 | -0.542848  | 0.583 | 0.646 | 1 | 16 |
| Ypel3.7     | 0.00034107 | -0.7274828 | 0.143 | 0.307 | 1 | 16 |
| Tgfb1.5     | 0.0003809  | -0.7102366 | 0.167 | 0.33  | 1 | 16 |
| 4930523C07R | 0.0003837  | 0.3218025  | 0.286 | 0.143 | 1 | 16 |
| Socs3.13    | 0.00038963 | -0.9449283 | 0.131 | 0.281 | 1 | 16 |
| Ubxn1       | 0.00041075 | 0.30732798 | 0.452 | 0.272 | 1 | 16 |
| Eno1.8      | 0.00041856 | -0.5426059 | 0.25  | 0.414 | 1 | 16 |
| Nme2.4      | 0.00051469 | -0.5179211 | 0.452 | 0.552 | 1 | 16 |
| Psap.13     | 0.00060485 | -0.6270572 | 0.667 | 0.676 | 1 | 16 |
| Csnk2b.3    | 0.00061507 | 0.31802433 | 0.345 | 0.187 | 1 | 16 |
| Cox5b.4     | 0.00062631 | 0.25523931 | 0.667 | 0.432 | 1 | 16 |

|            |            |            |       |       |   |    |
|------------|------------|------------|-------|-------|---|----|
| Cox5a.5    | 0.00066026 | 0.29019082 | 0.571 | 0.378 | 1 | 16 |
| Litaf.7    | 0.00080061 | 0.26350269 | 0.452 | 0.261 | 1 | 16 |
| Itgb2.10   | 0.00080465 | -0.7326813 | 0.119 | 0.269 | 1 | 16 |
| Tln1.5     | 0.00081109 | -0.6195146 | 0.31  | 0.429 | 1 | 16 |
| Tmem50a.5  | 0.00081689 | -0.59124   | 0.19  | 0.347 | 1 | 16 |
| Cd68.12    | 0.00083258 | -0.7421463 | 0.119 | 0.274 | 1 | 16 |
| Rpl12.11   | 0.00086693 | -0.4065218 | 0.702 | 0.762 | 1 | 16 |
| Tra2a      | 0.0009073  | 0.31971695 | 0.298 | 0.156 | 1 | 16 |
| Coro1a.8   | 0.00097988 | -0.4685059 | 0.571 | 0.638 | 1 | 16 |
| Gstp1.7    | 0.0011289  | -0.7260175 | 0.155 | 0.299 | 1 | 16 |
| Tmbim4.2   | 0.00123516 | 0.27459765 | 0.286 | 0.151 | 1 | 16 |
| Ddx5.7     | 0.0012435  | -0.4245218 | 0.619 | 0.703 | 1 | 16 |
| Dusp1.10   | 0.00124673 | -0.6833399 | 0.56  | 0.606 | 1 | 16 |
| Emp3.9     | 0.0012538  | -0.5860057 | 0.298 | 0.435 | 1 | 16 |
| Ube2n.1    | 0.00126529 | 0.27572036 | 0.274 | 0.141 | 1 | 16 |
| Prcp.2     | 0.0012817  | 0.34136476 | 0.321 | 0.187 | 1 | 16 |
| Dek.1      | 0.00129177 | 0.29035398 | 0.369 | 0.213 | 1 | 16 |
| Ilk        | 0.00143474 | 0.27072724 | 0.274 | 0.143 | 1 | 16 |
| Slc3a2.2   | 0.00147083 | 0.32828664 | 0.369 | 0.215 | 1 | 16 |
| Zeb2.14    | 0.00159488 | -0.719851  | 0.155 | 0.297 | 1 | 16 |
| Ndfip1.5   | 0.00170461 | -0.6160531 | 0.155 | 0.299 | 1 | 16 |
| Ncf1.1     | 0.00191144 | 0.38218544 | 0.262 | 0.144 | 1 | 16 |
| Dad1.5     | 0.00192498 | -0.6416389 | 0.19  | 0.327 | 1 | 16 |
| mt-Nd4.7   | 0.0019774  | -0.3107258 | 0.643 | 0.703 | 1 | 16 |
| mt-Atp6.3  | 0.00201155 | -0.3149009 | 0.75  | 0.797 | 1 | 16 |
| Ptpn6.8    | 0.00204722 | -0.5898635 | 0.119 | 0.26  | 1 | 16 |
| Rassf4.9   | 0.00212721 | 0.35134902 | 0.393 | 0.244 | 1 | 16 |
| Mlf2       | 0.00223786 | 0.30231216 | 0.298 | 0.164 | 1 | 16 |
| Sdcbp.10   | 0.00261016 | -0.6009225 | 0.143 | 0.276 | 1 | 16 |
| Pcbp2.2    | 0.00272935 | 0.25761398 | 0.643 | 0.449 | 1 | 16 |
| Grcc10.4   | 0.00285671 | -0.5398473 | 0.274 | 0.402 | 1 | 16 |
| Lgals1.12  | 0.00318501 | -0.7863953 | 0.298 | 0.404 | 1 | 16 |
| Rps17      | 0.00320242 | -0.3624585 | 0.417 | 0.543 | 1 | 16 |
| Tbca.3     | 0.00347644 | 0.29530503 | 0.429 | 0.278 | 1 | 16 |
| Fyb.11     | 0.00364513 | -0.6184089 | 0.119 | 0.251 | 1 | 16 |
| Gpcpd1.3   | 0.00411717 | 0.27552368 | 0.274 | 0.155 | 1 | 16 |
| Atf3.12    | 0.00469876 | -0.7645138 | 0.417 | 0.508 | 1 | 16 |
| Samhd1.2   | 0.00516652 | 0.34338215 | 0.44  | 0.298 | 1 | 16 |
| Hnrnpa3.2  | 0.00527668 | -0.3823324 | 0.369 | 0.504 | 1 | 16 |
| Gm2a.14    | 0.00532761 | -0.5348253 | 0.155 | 0.288 | 1 | 16 |
| Hsp90aa1.2 | 0.00588055 | -0.4761665 | 0.214 | 0.344 | 1 | 16 |
| Cd52.11    | 0.00643884 | -0.3993018 | 0.786 | 0.734 | 1 | 16 |
| Ptprc.7    | 0.00668708 | -0.5869491 | 0.357 | 0.442 | 1 | 16 |

|            |            |            |       |       |           |    |
|------------|------------|------------|-------|-------|-----------|----|
| Stat3.2    | 0.0068484  | 0.30443402 | 0.369 | 0.244 | 1         | 16 |
| Eif5a.4    | 0.00693624 | -0.4517915 | 0.321 | 0.425 | 1         | 16 |
| Cotl1.7    | 0.0073476  | -0.5108585 | 0.25  | 0.363 | 1         | 16 |
| Iqgap1.5   | 0.00736199 | 0.25699747 | 0.583 | 0.439 | 1         | 16 |
| Clic1.6    | 0.00800621 | -0.3947964 | 0.405 | 0.505 | 1         | 16 |
| Slc25a5.1  | 0.00901437 | -0.3943339 | 0.202 | 0.33  | 1         | 16 |
| Ifitm2.14  | 0.00942515 | -0.7284979 | 0.31  | 0.391 | 1         | 16 |
| Ube2l3     | 0.00955651 | 0.26524654 | 0.286 | 0.171 | 1         | 16 |
| Il1r2      | 1.43E-229  | 1.79280685 | 0.667 | 0.018 | 2.36E-225 | 17 |
| Il1b.10    | 5.11E-35   | 1.65251853 | 0.889 | 0.24  | 8.40E-31  | 17 |
| Tnfaip2    | 1.59E-61   | 1.45916514 | 0.537 | 0.047 | 2.61E-57  | 17 |
| Gsn.3      | 1.58E-50   | 1.44712335 | 0.852 | 0.143 | 2.59E-46  | 17 |
| Ccl22.1    | 1.56E-126  | 1.44131959 | 0.463 | 0.016 | 2.56E-122 | 17 |
| Ccl17.1    | 3.80E-45   | 1.3946742  | 0.315 | 0.022 | 6.25E-41  | 17 |
| Il1a       | 1.94E-91   | 1.32259492 | 0.426 | 0.019 | 3.19E-87  | 17 |
| Itgax      | 1.38E-88   | 1.31256043 | 0.741 | 0.061 | 2.27E-84  | 17 |
| Bhlhe40.6  | 3.97E-36   | 1.28481723 | 0.833 | 0.179 | 6.54E-32  | 17 |
| Grasp.2    | 2.02E-57   | 1.28361199 | 0.574 | 0.056 | 3.33E-53  | 17 |
| Cst3.14    | 8.01E-24   | 1.25642083 | 1     | 0.683 | 1.32E-19  | 17 |
| Ccrl2      | 1.34E-42   | 1.22202635 | 0.574 | 0.073 | 2.20E-38  | 17 |
| Epcam      | 8.87E-103  | 1.21534571 | 0.481 | 0.022 | 1.46E-98  | 17 |
| Smim3      | 2.61E-106  | 1.18238746 | 0.5   | 0.023 | 4.29E-102 | 17 |
| Spint1     | 3.67E-174  | 1.17074603 | 0.556 | 0.016 | 6.03E-170 | 17 |
| Gng10.3    | 1.58E-42   | 1.16960751 | 0.981 | 0.208 | 2.60E-38  | 17 |
| Cd74.12    | 3.95E-28   | 1.10140722 | 1     | 0.826 | 6.50E-24  | 17 |
| Gm2a.15    | 6.42E-26   | 1.09300725 | 0.907 | 0.282 | 1.06E-21  | 17 |
| Itgae.1    | 3.64E-105  | 1.08216365 | 0.444 | 0.018 | 5.99E-101 | 17 |
| Cd9.2      | 1.46E-31   | 1.07584375 | 0.667 | 0.125 | 2.40E-27  | 17 |
| Nfkbia.13  | 8.47E-21   | 1.06295209 | 0.981 | 0.517 | 1.39E-16  | 17 |
| Qpct.1     | 2.41E-72   | 1.0619571  | 0.519 | 0.036 | 3.96E-68  | 17 |
| Ptgs2      | 9.18E-58   | 1.04267684 | 0.481 | 0.039 | 1.51E-53  | 17 |
| Ccl4.2     | 2.95E-09   | 1.03413438 | 0.407 | 0.13  | 4.85E-05  | 17 |
| Cd209a.2   | 4.59E-24   | 1.02644949 | 0.667 | 0.152 | 7.55E-20  | 17 |
| H2-DMb1.17 | 0.00201368 | -1.2552591 | 0.069 | 0.329 | 1         | 19 |
| Basp1.2    | 5.12E-34   | 1.02207187 | 0.537 | 0.079 | 8.43E-30  | 17 |
| Smpdl3a.3  | 5.48E-28   | 1.02052288 | 0.704 | 0.157 | 9.01E-24  | 17 |
| Wdfy4.4    | 1.12E-35   | 1.01356136 | 0.741 | 0.134 | 1.84E-31  | 17 |
| Nfe2l2.2   | 1.73E-29   | 0.99626522 | 0.833 | 0.188 | 2.84E-25  | 17 |
| Tctex1d2   | 5.28E-49   | 0.99468642 | 0.426 | 0.036 | 8.69E-45  | 17 |
| Dusp2.2    | 1.06E-21   | 0.99458458 | 0.611 | 0.145 | 1.75E-17  | 17 |
| Actn1.1    | 1.96E-46   | 0.99432118 | 0.5   | 0.051 | 3.23E-42  | 17 |
| H2-DMb1.5  | 1.25E-38   | -1.400781  | 0.02  | 0.344 | 2.06E-34  | 7  |
| Bcl2a1d.5  | 9.77E-25   | 0.97478057 | 0.685 | 0.156 | 1.61E-20  | 17 |

|            |           |            |       |       |            |    |
|------------|-----------|------------|-------|-------|------------|----|
| Gsg1       | 6.35E-292 | 0.96756844 | 0.407 | 0.004 | 1.04E-287  | 17 |
| Havcr2     | 4.59E-102 | 0.96378161 | 0.463 | 0.02  | 7.54E-98   | 17 |
| Rtl8c.1    | 2.78E-46  | 0.96371891 | 0.463 | 0.045 | 4.57E-42   | 17 |
| Lgals3.15  | 2.71E-19  | 0.95957835 | 0.889 | 0.346 | 4.45E-15   | 17 |
| Nr4a3.3    | 5.83E-30  | 0.94688203 | 0.593 | 0.102 | 9.58E-26   | 17 |
| Dusp5.8    | 8.36E-20  | 0.9440444  | 0.759 | 0.226 | 1.38E-15   | 17 |
| Ccr1       | 1.07E-29  | 0.93713591 | 0.519 | 0.081 | 1.76E-25   | 17 |
| H2-DMa.3   | 1.07E-47  | -1.4036273 | 0.064 | 0.445 | 1.77E-43   | 7  |
| Etv3.3     | 2.98E-23  | 0.93070472 | 0.722 | 0.176 | 4.91E-19   | 17 |
| Sec61b.9   | 1.93E-13  | 0.92838081 | 0.907 | 0.479 | 3.17E-09   | 17 |
| Plet1      | 1.58E-119 | 0.92401525 | 0.296 | 0.006 | 2.59E-115  | 17 |
| Hexb       | 7.34E-27  | 0.92273288 | 0.685 | 0.145 | 1.21E-22   | 17 |
| Ywhah.7    | 4.31E-19  | 0.91976676 | 0.815 | 0.259 | 7.09E-15   | 17 |
| Csf2rb.3   | 6.37E-21  | 0.9189662  | 0.556 | 0.121 | 1.05E-16   | 17 |
| Icam1.4    | 5.44E-20  | 0.91824496 | 0.667 | 0.173 | 8.95E-16   | 17 |
| Nr4a2.4    | 4.39E-12  | 0.91359976 | 0.574 | 0.199 | 7.21E-08   | 17 |
| Mdh2       | 6.81E-21  | 0.88880196 | 0.759 | 0.212 | 1.12E-16   | 17 |
| Tnip3.3    | 3.09E-23  | 0.88836255 | 0.593 | 0.124 | 5.09E-19   | 17 |
| Herpud1.4  | 5.65E-14  | 0.88497335 | 0.593 | 0.183 | 9.29E-10   | 17 |
| Atox1.16   | 4.67E-19  | 0.87339597 | 0.963 | 0.453 | 7.68E-15   | 17 |
| Pkib.1     | 3.28E-36  | 0.86961913 | 0.519 | 0.067 | 5.40E-32   | 17 |
| Tnfsf9.1   | 1.12E-24  | 0.85521856 | 0.463 | 0.076 | 1.85E-20   | 17 |
| Kit        | 6.34E-66  | 0.84797343 | 0.296 | 0.013 | 1.04E-61   | 17 |
| Pak1.1     | 2.11E-30  | 0.83274232 | 0.444 | 0.06  | 3.46E-26   | 17 |
| Vrk1       | 5.24E-24  | 0.82236705 | 0.463 | 0.079 | 8.62E-20   | 17 |
| Cxcl16.2   | 9.69E-31  | 0.81553883 | 0.63  | 0.108 | 1.59E-26   | 17 |
| Vasp.2     | 1.85E-22  | 0.80495157 | 0.722 | 0.18  | 3.05E-18   | 17 |
| Pilra      | 1.07E-36  | 0.79947005 | 0.389 | 0.039 | 1.76E-32   | 17 |
| Themis2    | 3.74E-27  | 0.79631108 | 0.519 | 0.085 | 6.15E-23   | 17 |
| Med21      | 6.59E-09  | 0.79149445 | 0.259 | 0.064 | 0.00010833 | 17 |
| Ppp1r1a    | 0         | 0.78126576 | 0.278 | 0.001 | 0          | 17 |
| Taldo1.4   | 1.08E-15  | 0.7773729  | 0.778 | 0.275 | 1.77E-11   | 17 |
| Gngt2.1    | 4.86E-33  | 0.77658567 | 0.63  | 0.101 | 7.99E-29   | 17 |
| Igsf8      | 1.97E-26  | 0.77657585 | 0.37  | 0.048 | 3.25E-22   | 17 |
| Bcl2a1a.2  | 1.07E-16  | 0.7667088  | 0.37  | 0.07  | 1.76E-12   | 17 |
| Akr7a5     | 3.72E-32  | 0.75841856 | 0.426 | 0.052 | 6.12E-28   | 17 |
| Rogdi.1    | 3.43E-34  | 0.75810191 | 0.5   | 0.065 | 5.64E-30   | 17 |
| Csrnp1.3   | 6.47E-15  | 0.75481767 | 0.685 | 0.221 | 1.06E-10   | 17 |
| Rasgef1b.1 | 5.39E-13  | 0.7486936  | 0.463 | 0.125 | 8.86E-09   | 17 |
| Malt1.3    | 2.21E-21  | 0.74294657 | 0.593 | 0.128 | 3.64E-17   | 17 |
| Cd300c2.1  | 2.64E-25  | 0.74233803 | 0.519 | 0.09  | 4.35E-21   | 17 |
| Tbc1d9.1   | 1.56E-22  | 0.73703763 | 0.407 | 0.064 | 2.57E-18   | 17 |
| Lsp1.13    | 7.38E-14  | 0.73145464 | 0.889 | 0.393 | 1.21E-09   | 17 |

|            |          |            |       |       |            |    |
|------------|----------|------------|-------|-------|------------|----|
| Skil.2     | 6.05E-18 | 0.72722147 | 0.537 | 0.125 | 9.95E-14   | 17 |
| Ebi3       | 9.17E-25 | 0.71690463 | 0.519 | 0.091 | 1.51E-20   | 17 |
| Ccdc12.2   | 8.05E-15 | 0.70987354 | 0.704 | 0.224 | 1.32E-10   | 17 |
| Tep1.2     | 2.71E-15 | 0.69689644 | 0.481 | 0.113 | 4.46E-11   | 17 |
| F11r       | 1.41E-48 | 0.68932708 | 0.278 | 0.015 | 2.32E-44   | 17 |
| Napsa.14   | 2.06E-16 | 0.67939106 | 0.815 | 0.26  | 3.39E-12   | 17 |
| Slamf7.4   | 8.22E-14 | 0.67141715 | 0.481 | 0.125 | 1.35E-09   | 17 |
| Ivns1abp   | 7.63E-21 | 0.67068851 | 0.444 | 0.079 | 1.25E-16   | 17 |
| Sdf2l1.4   | 3.17E-13 | 0.66395641 | 0.556 | 0.161 | 5.22E-09   | 17 |
| Tbc1d4.1   | 1.72E-30 | 0.66014691 | 0.389 | 0.045 | 2.83E-26   | 17 |
| Tnf        | 3.47E-11 | 0.65994818 | 0.333 | 0.079 | 5.70E-07   | 17 |
| Lmnb1.2    | 1.10E-14 | 0.65355864 | 0.426 | 0.098 | 1.81E-10   | 17 |
| Csf2ra.5   | 2.37E-19 | 0.65345337 | 0.611 | 0.142 | 3.90E-15   | 17 |
| Lcp1.6     | 4.37E-10 | 0.6525817  | 0.907 | 0.532 | 7.18E-06   | 17 |
| Plbd1.8    | 4.44E-16 | 0.647815   | 0.778 | 0.237 | 7.31E-12   | 17 |
| Spi1.12    | 2.93E-14 | 0.64598554 | 0.833 | 0.302 | 4.81E-10   | 17 |
| Ncf1.2     | 3.44E-12 | 0.64380433 | 0.5   | 0.143 | 5.67E-08   | 17 |
| Cd33       | 2.95E-19 | 0.64047614 | 0.333 | 0.051 | 4.86E-15   | 17 |
| Pmaip1.3   | 2.05E-09 | 0.63731482 | 0.352 | 0.098 | 3.37E-05   | 17 |
| S100a11.11 | 3.27E-11 | 0.62971615 | 0.852 | 0.395 | 5.37E-07   | 17 |
| Tmem238    | 2.98E-12 | 0.62789051 | 0.259 | 0.049 | 4.90E-08   | 17 |
| Ssr4.5     | 6.76E-11 | 0.6189147  | 0.833 | 0.367 | 1.11E-06   | 17 |
| Gdi2.7     | 4.53E-08 | 0.61143923 | 0.741 | 0.373 | 0.00074577 | 17 |
| Elovl5     | 9.89E-13 | 0.60999218 | 0.296 | 0.059 | 1.63E-08   | 17 |
| Srgn.8     | 6.91E-12 | 0.60361234 | 0.963 | 0.671 | 1.14E-07   | 17 |
| Syngn2.10  | 1.11E-13 | 0.60079552 | 0.741 | 0.244 | 1.83E-09   | 17 |
| Bcl2a1b.5  | 1.42E-06 | 0.59023553 | 0.463 | 0.197 | 0.02331043 | 17 |
| Arl5c.1    | 8.02E-14 | 0.57758485 | 0.333 | 0.067 | 1.32E-09   | 17 |
| Slc2a6     | 1.29E-29 | 0.57161536 | 0.296 | 0.028 | 2.12E-25   | 17 |
| Dapk1      | 9.51E-14 | 0.56954897 | 0.333 | 0.068 | 1.56E-09   | 17 |
| H2-Ab1.10  | 3.00E-14 | -1.406629  | 0.627 | 0.71  | 4.94E-10   | 14 |
| Gpi1.2     | 1.03E-10 | 0.56320224 | 0.796 | 0.31  | 1.69E-06   | 17 |
| Rgs1.2     | 1.32E-11 | 0.5621057  | 0.426 | 0.115 | 2.17E-07   | 17 |
| Ppfia4     | 1.30E-19 | 0.55987638 | 0.352 | 0.055 | 2.14E-15   | 17 |
| Fam49b.7   | 1.50E-10 | 0.55678035 | 0.759 | 0.297 | 2.47E-06   | 17 |
| Ifitm6.3   | 1.97E-15 | 0.55601161 | 0.519 | 0.124 | 3.24E-11   | 17 |
| Got1.1     | 8.58E-18 | 0.55515134 | 0.481 | 0.1   | 1.41E-13   | 17 |
| Mical1     | 1.86E-13 | 0.54817499 | 0.296 | 0.056 | 3.05E-09   | 17 |
| Flt3.2     | 1.04E-15 | 0.54522023 | 0.259 | 0.04  | 1.71E-11   | 17 |
| Ikbkb.3    | 1.23E-14 | 0.54388181 | 0.537 | 0.136 | 2.03E-10   | 17 |
| Arl4c.1    | 3.21E-12 | 0.54142087 | 0.407 | 0.101 | 5.28E-08   | 17 |
| Hck.1      | 3.03E-11 | 0.54081444 | 0.37  | 0.092 | 4.98E-07   | 17 |
| Jak2.1     | 7.94E-18 | 0.53872782 | 0.426 | 0.082 | 1.31E-13   | 17 |

|               |          |            |       |       |            |    |
|---------------|----------|------------|-------|-------|------------|----|
| Anpep.1       | 3.49E-21 | 0.53421163 | 0.259 | 0.03  | 5.74E-17   | 17 |
| Card11        | 1.54E-17 | 0.53198369 | 0.389 | 0.071 | 2.53E-13   | 17 |
| Tmem39a.1     | 6.84E-20 | 0.52413584 | 0.315 | 0.045 | 1.12E-15   | 17 |
| Sh3bgrl3.10   | 3.90E-10 | 0.52144715 | 1     | 0.746 | 6.42E-06   | 17 |
| Jaml.1        | 7.96E-18 | 0.52134344 | 0.37  | 0.065 | 1.31E-13   | 17 |
| Cd52.12       | 2.92E-10 | 0.5140816  | 1     | 0.732 | 4.81E-06   | 17 |
| Aif1.3        | 2.81E-12 | 0.51100121 | 0.63  | 0.197 | 4.62E-08   | 17 |
| Sowahc        | 1.55E-12 | 0.51026908 | 0.278 | 0.053 | 2.55E-08   | 17 |
| Fgl2.3        | 7.62E-12 | 0.50767808 | 0.463 | 0.125 | 1.25E-07   | 17 |
| Agpat4.2      | 7.29E-16 | 0.50730349 | 0.407 | 0.083 | 1.20E-11   | 17 |
| Hk2           | 1.76E-18 | 0.50662053 | 0.296 | 0.043 | 2.90E-14   | 17 |
| Ccnd2.5       | 1.28E-09 | 0.50576047 | 0.574 | 0.202 | 2.11E-05   | 17 |
| Nlrp3         | 5.55E-10 | 0.50447629 | 0.352 | 0.091 | 9.13E-06   | 17 |
| Nr4a1.10      | 2.09E-07 | 0.50301419 | 0.926 | 0.502 | 0.00343778 | 17 |
| Atxn10        | 1.68E-10 | 0.50089656 | 0.333 | 0.082 | 2.77E-06   | 17 |
| I830077J02Rik | 1.36E-38 | 0.49968923 | 0.259 | 0.017 | 2.23E-34   | 17 |
| Tnfaip3.11    | 7.75E-09 | 0.4963483  | 0.741 | 0.326 | 0.00012741 | 17 |
| Zfp593        | 7.02E-10 | 0.49492957 | 0.259 | 0.058 | 1.15E-05   | 17 |
| Gapdh.7       | 1.76E-10 | 0.4948492  | 1     | 0.711 | 2.90E-06   | 17 |
| Actg1.10      | 6.80E-11 | 0.49389964 | 1     | 0.901 | 1.12E-06   | 17 |
| Cyb5r3        | 4.15E-18 | 0.49346704 | 0.444 | 0.086 | 6.82E-14   | 17 |
| Rtn1          | 6.92E-19 | 0.49328966 | 0.259 | 0.033 | 1.14E-14   | 17 |
| Maff          | 4.14E-13 | 0.49265285 | 0.315 | 0.063 | 6.82E-09   | 17 |
| Ccdc88b       | 3.72E-16 | 0.49239244 | 0.352 | 0.064 | 6.11E-12   | 17 |
| Plcb2         | 2.07E-17 | 0.49133338 | 0.259 | 0.036 | 3.40E-13   | 17 |
| Med29         | 5.09E-10 | 0.49086919 | 0.278 | 0.063 | 8.37E-06   | 17 |
| Alcam.2       | 9.85E-15 | 0.4897373  | 0.352 | 0.069 | 1.62E-10   | 17 |
| Nap1l1.7      | 4.61E-09 | 0.48792181 | 0.667 | 0.258 | 7.58E-05   | 17 |
| Rplp0.7       | 1.70E-12 | 0.48682242 | 1     | 0.903 | 2.79E-08   | 17 |
| Cytip.10      | 5.54E-09 | 0.48625571 | 0.759 | 0.324 | 9.12E-05   | 17 |
| Rheb          | 3.47E-10 | 0.48529649 | 0.519 | 0.163 | 5.71E-06   | 17 |
| Mrpl52.3      | 5.25E-09 | 0.48409437 | 0.741 | 0.315 | 8.64E-05   | 17 |
| Stap1         | 3.19E-10 | 0.48282909 | 0.426 | 0.121 | 5.25E-06   | 17 |
| Lpcat2.1      | 1.92E-17 | 0.48107441 | 0.278 | 0.04  | 3.16E-13   | 17 |
| Nfkbib.1      | 2.13E-06 | 0.48009768 | 0.352 | 0.122 | 0.03504429 | 17 |
| Tnfaip8.4     | 2.13E-09 | 0.47832335 | 0.537 | 0.182 | 3.51E-05   | 17 |
| Cotl1.8       | 7.71E-09 | 0.47826712 | 0.815 | 0.359 | 0.0001268  | 17 |
| Ptms.13       | 5.20E-10 | 0.47758733 | 0.741 | 0.285 | 8.55E-06   | 17 |
| Hfe.2         | 1.62E-12 | 0.47738005 | 0.426 | 0.105 | 2.66E-08   | 17 |
| Fam105a.1     | 4.87E-08 | 0.47312261 | 0.389 | 0.125 | 0.00080043 | 17 |
| Pilrb2        | 7.06E-17 | 0.47206973 | 0.278 | 0.041 | 1.16E-12   | 17 |
| Fth1.14       | 9.79E-10 | 0.47118748 | 1     | 0.958 | 1.61E-05   | 17 |
| Plk3          | 3.95E-14 | 0.47017239 | 0.333 | 0.065 | 6.50E-10   | 17 |

|             |          |            |       |       |            |    |
|-------------|----------|------------|-------|-------|------------|----|
| Csrp1.2     | 1.18E-10 | 0.46998856 | 0.296 | 0.067 | 1.94E-06   | 17 |
| Alox5ap.16  | 2.16E-09 | 0.469814   | 0.87  | 0.394 | 3.56E-05   | 17 |
| Ctss.12     | 1.25E-08 | 0.46897684 | 0.944 | 0.498 | 0.00020623 | 17 |
| Cass4.1     | 3.95E-10 | 0.46797969 | 0.296 | 0.07  | 6.50E-06   | 17 |
| Sulf2       | 6.51E-15 | 0.45977823 | 0.444 | 0.098 | 1.07E-10   | 17 |
| H2-Eb1.9    | 2.22E-15 | -1.419768  | 0.564 | 0.71  | 3.65E-11   | 14 |
| Tbc1d8.2    | 1.16E-14 | 0.45721633 | 0.278 | 0.046 | 1.90E-10   | 17 |
| Gadd45b.13  | 1.16E-07 | 0.44629454 | 0.611 | 0.248 | 0.00190922 | 17 |
| Tmem131     | 5.54E-10 | 0.44336666 | 0.296 | 0.07  | 9.11E-06   | 17 |
| Ctsz.10     | 9.14E-07 | 0.4398985  | 0.741 | 0.35  | 0.0150356  | 17 |
| Dot1l       | 1.38E-06 | 0.43926206 | 0.278 | 0.086 | 0.02270737 | 17 |
| Irf4.1      | 8.72E-08 | 0.43257041 | 0.296 | 0.083 | 0.00143412 | 17 |
| Lsm6.1      | 1.37E-08 | 0.43066915 | 0.481 | 0.162 | 0.00022579 | 17 |
| Tmsb4x.12   | 4.80E-13 | 0.43015289 | 1     | 0.993 | 7.89E-09   | 17 |
| Zeb1        | 7.95E-13 | 0.42960526 | 0.259 | 0.046 | 1.31E-08   | 17 |
| Plscr1      | 2.08E-11 | 0.42876822 | 0.259 | 0.05  | 3.42E-07   | 17 |
| Egr3.1      | 2.47E-06 | 0.42403437 | 0.296 | 0.095 | 0.04059967 | 17 |
| Snx20.4     | 8.13E-05 | 0.42116939 | 0.37  | 0.165 | 1          | 17 |
| Filip1l     | 1.70E-13 | 0.42086274 | 0.37  | 0.079 | 2.79E-09   | 17 |
| Neur13.2    | 1.20E-09 | 0.41982243 | 0.556 | 0.179 | 1.97E-05   | 17 |
| Mkl1.1      | 3.55E-14 | 0.41578334 | 0.352 | 0.07  | 5.84E-10   | 17 |
| Ccnd1.2     | 1.86E-06 | 0.4144361  | 0.37  | 0.13  | 0.03056853 | 17 |
| Soat1       | 1.76E-09 | 0.4133604  | 0.296 | 0.072 | 2.90E-05   | 17 |
| Nfkbie.1    | 5.03E-08 | 0.41208074 | 0.352 | 0.107 | 0.00082674 | 17 |
| Rpl14.11    | 4.34E-08 | 0.41175576 | 0.981 | 0.785 | 0.00071432 | 17 |
| Spint2.2    | 5.23E-08 | 0.41114317 | 0.296 | 0.081 | 0.00086072 | 17 |
| Actb.10     | 3.77E-10 | 0.41071831 | 1     | 0.993 | 6.20E-06   | 17 |
| Atp6v0e.2   | 9.81E-07 | 0.41029022 | 0.796 | 0.385 | 0.0161374  | 17 |
| H2-Aa.11    | 3.83E-19 | -1.4208063 | 0.361 | 0.748 | 6.30E-15   | 15 |
| Klrd1.1     | 1.90E-09 | 0.40718481 | 0.278 | 0.065 | 3.13E-05   | 17 |
| Isy1        | 1.23E-07 | 0.40176753 | 0.333 | 0.1   | 0.00202842 | 17 |
| Coq10b      | 7.04E-07 | 0.40081135 | 0.352 | 0.116 | 0.01158436 | 17 |
| Nceh1       | 5.72E-14 | 0.39960745 | 0.278 | 0.048 | 9.40E-10   | 17 |
| Tmed5.1     | 1.28E-06 | 0.39887891 | 0.444 | 0.171 | 0.02097395 | 17 |
| Arf6.5      | 7.36E-09 | 0.39821445 | 0.648 | 0.243 | 0.00012099 | 17 |
| Osgep       | 1.90E-10 | 0.39605052 | 0.333 | 0.081 | 3.12E-06   | 17 |
| Abi3        | 1.14E-15 | 0.39604059 | 0.333 | 0.059 | 1.88E-11   | 17 |
| Cbfa2t3.4   | 2.70E-11 | 0.39292915 | 0.519 | 0.15  | 4.44E-07   | 17 |
| Pim1.9      | 1.78E-05 | 0.39219138 | 0.778 | 0.447 | 0.29280553 | 17 |
| Man2b1.12   | 4.75E-07 | 0.39153367 | 0.685 | 0.296 | 0.00781699 | 17 |
| Nedd8       | 3.00E-08 | 0.39094852 | 0.704 | 0.283 | 0.00049302 | 17 |
| Uqcc2.2     | 1.76E-06 | 0.38984754 | 0.444 | 0.169 | 0.02900401 | 17 |
| Gabarapl2.3 | 1.36E-07 | 0.38940615 | 0.556 | 0.214 | 0.00223854 | 17 |



|            |            |            |       |       |            |    |
|------------|------------|------------|-------|-------|------------|----|
| Tuba1c.2   | 3.96E-10   | 0.38757178 | 0.556 | 0.178 | 6.52E-06   | 17 |
| Rnase6.1   | 4.55E-12   | 0.38671714 | 0.407 | 0.099 | 7.48E-08   | 17 |
| Wdr1.2     | 1.19E-06   | 0.38603277 | 0.611 | 0.26  | 0.01964903 | 17 |
| Ckb.5      | 7.14E-09   | 0.38239304 | 0.63  | 0.232 | 0.00011747 | 17 |
| Crtc3      | 2.37E-10   | 0.38091093 | 0.296 | 0.067 | 3.90E-06   | 17 |
| Rbm17.2    | 8.87E-06   | 0.37926813 | 0.315 | 0.111 | 0.14589017 | 17 |
| Tgif1.2    | 1.60E-08   | 0.37538975 | 0.426 | 0.133 | 0.00026334 | 17 |
| Tgfb1.6    | 8.73E-07   | 0.3753823  | 0.741 | 0.325 | 0.01435405 | 17 |
| Btg2.11    | 5.72E-05   | 0.3736086  | 0.907 | 0.669 | 0.94036898 | 17 |
| Ms4a6c.4   | 4.75E-09   | 0.37138149 | 0.63  | 0.226 | 7.81E-05   | 17 |
| Arf4.3     | 6.75E-06   | 0.36373753 | 0.519 | 0.22  | 0.11105828 | 17 |
| Myh9.10    | 0.00021314 | 0.36227042 | 0.815 | 0.5   | 1          | 17 |
| Crlf2      | 2.31E-05   | 0.36189775 | 0.444 | 0.188 | 0.38022627 | 17 |
| Pip5k1c    | 6.11E-08   | 0.36169425 | 0.278 | 0.073 | 0.00100561 | 17 |
| Khk        | 8.55E-13   | 0.36114427 | 0.259 | 0.045 | 1.41E-08   | 17 |
| Atpif1.15  | 4.51E-06   | 0.36013618 | 0.685 | 0.312 | 0.07412607 | 17 |
| Apbb1ip.3  | 1.20E-09   | 0.35761347 | 0.593 | 0.2   | 1.97E-05   | 17 |
| Cd300a.1   | 2.24E-09   | 0.35720576 | 0.333 | 0.085 | 3.68E-05   | 17 |
| Myl12a.4   | 1.04E-05   | 0.35693235 | 0.741 | 0.391 | 0.17163793 | 17 |
| Ece1.1     | 2.23E-12   | 0.35145977 | 0.259 | 0.047 | 3.67E-08   | 17 |
| Sf3b1.1    | 2.44E-07   | 0.34973654 | 0.722 | 0.305 | 0.00402167 | 17 |
| Rbbp7.1    | 2.13E-06   | 0.34701873 | 0.389 | 0.139 | 0.03508586 | 17 |
| Rnaset2a.7 | 1.16E-06   | 0.34519001 | 0.648 | 0.276 | 0.01909203 | 17 |
| Rel.12     | 7.96E-07   | 0.34471587 | 0.648 | 0.278 | 0.01309914 | 17 |
| Fes        | 1.47E-07   | 0.34413725 | 0.315 | 0.091 | 0.00241486 | 17 |
| Rtraf.3    | 1.10E-07   | 0.34412639 | 0.667 | 0.264 | 0.00180429 | 17 |
| Glipr1     | 3.85E-11   | 0.34362913 | 0.315 | 0.069 | 6.33E-07   | 17 |
| Cd72.1     | 7.16E-12   | 0.3422271  | 0.37  | 0.085 | 1.18E-07   | 17 |
| Pcbp1      | 8.58E-05   | 0.34136454 | 0.685 | 0.339 | 1          | 17 |
| Dapp1      | 2.58E-08   | 0.33986138 | 0.278 | 0.071 | 0.00042391 | 17 |
| lfrd1.4    | 0.00076879 | 0.33971777 | 0.463 | 0.238 | 1          | 17 |
| Tyropb.14  | 5.03E-06   | 0.33833201 | 0.981 | 0.605 | 0.08271251 | 17 |
| Exosc5     | 3.25E-07   | 0.33556686 | 0.296 | 0.085 | 0.00535095 | 17 |
| Ube2f      | 3.64E-09   | 0.33539449 | 0.352 | 0.094 | 5.99E-05   | 17 |
| Srsf7.1    | 2.47E-05   | 0.33535751 | 0.481 | 0.214 | 0.40694869 | 17 |
| Myo1f.2    | 1.96E-05   | 0.33421326 | 0.333 | 0.125 | 0.32244856 | 17 |
| Tmem14c.2  | 1.18E-07   | 0.32904939 | 0.5   | 0.176 | 0.00194319 | 17 |
| Rassf5     | 5.10E-10   | 0.32832868 | 0.333 | 0.082 | 8.38E-06   | 17 |
| Fem1c      | 1.97E-07   | 0.32679417 | 0.278 | 0.076 | 0.00323765 | 17 |
| Mrpl30     | 0.00351706 | 0.32645311 | 0.389 | 0.207 | 1          | 17 |
| Cd24a.5    | 2.68E-09   | 0.32417036 | 0.444 | 0.134 | 4.41E-05   | 17 |
| Sf3a2      | 3.98E-07   | 0.32393671 | 0.278 | 0.078 | 0.00655005 | 17 |
| Snx10      | 5.21E-09   | 0.32294897 | 0.278 | 0.066 | 8.57E-05   | 17 |

|             |            |            |       |       |            |    |
|-------------|------------|------------|-------|-------|------------|----|
| Mgl2.12     | 1.60E-05   | 0.31971126 | 0.537 | 0.244 | 0.26283822 | 17 |
| Gtf2b       | 0.00017846 | 0.31691089 | 0.259 | 0.095 | 1          | 17 |
| H2afy.9     | 1.77E-06   | 0.31595188 | 0.593 | 0.25  | 0.02906058 | 17 |
| Rps27a.6    | 2.91E-06   | 0.31589189 | 1     | 0.936 | 0.04791763 | 17 |
| Myl12b.8    | 2.28E-05   | 0.31512274 | 0.87  | 0.505 | 0.374932   | 17 |
| Prdx6.3     | 2.25E-05   | 0.3117741  | 0.444 | 0.181 | 0.36965172 | 17 |
| Slc25a4     | 9.90E-07   | 0.31137254 | 0.315 | 0.098 | 0.01627932 | 17 |
| Pgam1.3     | 2.58E-05   | 0.31127055 | 0.389 | 0.156 | 0.42470255 | 17 |
| Clic4.13    | 0.00044488 | 0.30970853 | 0.5   | 0.25  | 1          | 17 |
| Dock10.3    | 2.49E-07   | 0.30759152 | 0.537 | 0.2   | 0.00410391 | 17 |
| Rpl29.7     | 5.47E-06   | 0.30754446 | 1     | 0.856 | 0.0900547  | 17 |
| Rab11fip1.1 | 4.55E-08   | 0.30714767 | 0.259 | 0.065 | 0.00074806 | 17 |
| Cdc42.4     | 7.76E-05   | 0.30677445 | 0.944 | 0.535 | 1          | 17 |
| Eif4g3      | 4.37E-06   | 0.30635264 | 0.37  | 0.134 | 0.07190374 | 17 |
| Gpx1.15     | 6.02E-06   | 0.3055675  | 0.981 | 0.71  | 0.0989799  | 17 |
| Cd86.1      | 5.64E-08   | 0.30518345 | 0.333 | 0.095 | 0.00092807 | 17 |
| Eef1b2.7    | 0.00026458 | 0.30372796 | 0.926 | 0.668 | 1          | 17 |
| Irf5.4      | 1.36E-07   | 0.30301078 | 0.481 | 0.165 | 0.00223001 | 17 |
| Rbmxl1      | 1.31E-07   | 0.30115647 | 0.278 | 0.075 | 0.00215592 | 17 |
| Dennd4a.5   | 5.69E-05   | 0.30036581 | 0.519 | 0.242 | 0.93556741 | 17 |
| Nuak2       | 8.94E-10   | 0.29958901 | 0.259 | 0.056 | 1.47E-05   | 17 |
| Rsu1        | 1.33E-08   | 0.29957336 | 0.333 | 0.09  | 0.00021828 | 17 |
| Gpsm3.2     | 9.06E-06   | 0.29743942 | 0.5   | 0.207 | 0.14905925 | 17 |
| Pdlim5      | 3.90E-06   | 0.29666972 | 0.259 | 0.079 | 0.0642317  | 17 |
| Mpc1        | 1.12E-05   | 0.29657921 | 0.481 | 0.198 | 0.18373353 | 17 |
| Ly86.11     | 3.50E-06   | 0.29587277 | 0.704 | 0.316 | 0.05755456 | 17 |
| Rpl6.7      | 1.32E-05   | 0.29578203 | 1     | 0.896 | 0.21660496 | 17 |
| Tm2d2       | 1.16E-08   | 0.29564545 | 0.426 | 0.129 | 0.00019139 | 17 |
| Tpm4.6      | 2.51E-05   | 0.29529637 | 0.537 | 0.242 | 0.4124599  | 17 |
| Rpl28.7     | 1.48E-06   | 0.29487565 | 1     | 0.913 | 0.0243582  | 17 |
| Rnh1.1      | 0.00024568 | 0.2942216  | 0.37  | 0.159 | 1          | 17 |
| Ap3b1       | 5.33E-05   | 0.29373025 | 0.296 | 0.109 | 0.87652546 | 17 |
| Ubl5        | 0.00100964 | 0.29369187 | 0.685 | 0.392 | 1          | 17 |
| Rpl39.9     | 5.28E-06   | 0.29335474 | 1     | 0.889 | 0.08689849 | 17 |
| Tbrg1.1     | 0.00028466 | 0.29323815 | 0.259 | 0.099 | 1          | 17 |
| Uqcrb.1     | 2.31E-05   | 0.29028027 | 0.611 | 0.279 | 0.38052864 | 17 |
| Acsf5       | 1.61E-06   | 0.29023246 | 0.278 | 0.083 | 0.02656014 | 17 |
| Traf1.4     | 5.02E-09   | 0.29000944 | 0.463 | 0.142 | 8.26E-05   | 17 |
| Rin3        | 1.15E-06   | 0.28994892 | 0.278 | 0.082 | 0.01899475 | 17 |
| Eef1a1.11   | 9.38E-08   | 0.28943359 | 1     | 0.98  | 0.00154284 | 17 |
| Erp44.1     | 4.31E-07   | 0.28865788 | 0.315 | 0.095 | 0.00709228 | 17 |
| Litaf.8     | 4.15E-06   | 0.28764994 | 0.611 | 0.261 | 0.06820071 | 17 |
| Fgr.1       | 7.98E-11   | 0.28740366 | 0.296 | 0.064 | 1.31E-06   | 17 |

|             |            |            |       |       |            |    |
|-------------|------------|------------|-------|-------|------------|----|
| Tma7.4      | 5.31E-05   | 0.28725191 | 0.667 | 0.334 | 0.8733036  | 17 |
| Ncf2.2      | 1.73E-08   | 0.28628566 | 0.519 | 0.172 | 0.00028459 | 17 |
| Lamtor1.1   | 2.99E-06   | 0.28492103 | 0.5   | 0.196 | 0.04921555 | 17 |
| Sbds        | 3.60E-06   | 0.28223935 | 0.296 | 0.094 | 0.05926887 | 17 |
| Itgb2.11    | 3.34E-06   | 0.28182669 | 0.611 | 0.265 | 0.05498611 | 17 |
| Rps26.11    | 2.31E-05   | 0.28125554 | 1     | 0.934 | 0.37989174 | 17 |
| Dnaja1.5    | 4.17E-07   | 0.28051382 | 0.63  | 0.254 | 0.00685834 | 17 |
| H2-DMb2     | 1.07E-114  | -1.4209558 | 0.023 | 0.297 | 1.76E-110  | 0  |
| Gsto1       | 4.29E-07   | 0.27983481 | 0.296 | 0.086 | 0.00705263 | 17 |
| Bri3bp.3    | 1.91E-07   | 0.27941659 | 0.389 | 0.124 | 0.00314272 | 17 |
| C1qbp.1     | 4.62E-08   | 0.27941281 | 0.426 | 0.135 | 0.00075976 | 17 |
| Psme1.9     | 1.23E-05   | 0.27765402 | 0.815 | 0.401 | 0.20194676 | 17 |
| Rps5.8      | 2.29E-06   | 0.27596199 | 1     | 0.962 | 0.03770849 | 17 |
| Myo1g.4     | 2.85E-05   | 0.27534611 | 0.389 | 0.155 | 0.46892459 | 17 |
| Fryl        | 2.17E-06   | 0.2732954  | 0.296 | 0.093 | 0.03566795 | 17 |
| Sh3bgrl.2   | 0.0039863  | 0.27013446 | 0.352 | 0.185 | 1          | 17 |
| Fam46a      | 0.00294324 | 0.26936592 | 0.278 | 0.129 | 1          | 17 |
| Chd7.1      | 0.00058545 | 0.2690473  | 0.278 | 0.115 | 1          | 17 |
| Rpl35.6     | 2.18E-05   | 0.26867288 | 0.981 | 0.924 | 0.35842833 | 17 |
| Erh.3       | 0.00012495 | 0.2677282  | 0.537 | 0.256 | 1          | 17 |
| Eif3k.5     | 0.00139754 | 0.26681222 | 0.741 | 0.44  | 1          | 17 |
| Arc4.6      | 0.00013983 | 0.26644913 | 0.685 | 0.34  | 1          | 17 |
| Tob2.1      | 0.00065245 | 0.26596482 | 0.389 | 0.178 | 1          | 17 |
| Mrps18a     | 8.39E-08   | 0.26585829 | 0.278 | 0.073 | 0.00138064 | 17 |
| Gpr183.1    | 3.03E-06   | 0.26516605 | 0.352 | 0.121 | 0.04991137 | 17 |
| Pabpc1.5    | 0.00040111 | 0.26438268 | 0.963 | 0.632 | 1          | 17 |
| Snap23      | 3.06E-07   | 0.26362306 | 0.333 | 0.1   | 0.0050277  | 17 |
| Rpl10-ps3.5 | 6.97E-05   | 0.2620118  | 0.981 | 0.893 | 1          | 17 |
| Pde4b.12    | 1.10E-05   | 0.26119611 | 0.833 | 0.415 | 0.18149202 | 17 |
| Adprh       | 1.80E-06   | 0.26096354 | 0.296 | 0.092 | 0.02956736 | 17 |
| Serf2.11    | 0.0005313  | 0.26058325 | 0.963 | 0.76  | 1          | 17 |
| Polr2g      | 4.51E-08   | 0.2600397  | 0.333 | 0.093 | 0.00074205 | 17 |
| Actr3.5     | 0.00194117 | 0.25689306 | 0.833 | 0.523 | 1          | 17 |
| Rpl37.6     | 0.00014385 | 0.25664658 | 1     | 0.929 | 1          | 17 |
| Hint2       | 1.56E-05   | 0.25663582 | 0.259 | 0.083 | 0.25609521 | 17 |
| Acp5        | 2.04E-08   | 0.25483643 | 0.333 | 0.091 | 0.00033498 | 17 |
| Cox5a.6     | 0.0001375  | 0.25121848 | 0.741 | 0.378 | 1          | 17 |
| Atp5e.7     | 0.00070739 | 0.25087353 | 0.926 | 0.621 | 1          | 17 |
| Atp6v1g1.6  | 7.98E-05   | 0.25078307 | 0.611 | 0.29  | 1          | 17 |
| Nme2.5      | 0.00030751 | 0.2503245  | 0.889 | 0.549 | 1          | 17 |
| mt-Co3.6    | 0.00138381 | -0.2528124 | 0.981 | 0.975 | 1          | 17 |
| mt-Co1.4    | 0.00024536 | -0.2724281 | 0.981 | 0.989 | 1          | 17 |
| mt-Cytb.6   | 0.00099925 | -0.3108607 | 0.963 | 0.937 | 1          | 17 |

|             |            |            |       |       |            |    |
|-------------|------------|------------|-------|-------|------------|----|
| mt-Atp8.13  | 0.00065587 | -0.3539006 | 0.944 | 0.929 | 1          | 17 |
| mt-Nd2.8    | 0.0095575  | -0.3684645 | 0.852 | 0.797 | 1          | 17 |
| Ubb.4       | 0.00127142 | -0.3975289 | 0.907 | 0.874 | 1          | 17 |
| Eif1.2      | 4.51E-05   | -0.430277  | 0.944 | 0.872 | 0.74109652 | 17 |
| mt-Atp6.4   | 0.00111041 | -0.4380774 | 0.87  | 0.796 | 1          | 17 |
| H3f3b.6     | 0.00011812 | -0.4929191 | 0.981 | 0.901 | 1          | 17 |
| H2-DMb2.2   | 2.26E-53   | -1.4392717 | 0     | 0.266 | 3.71E-49   | 3  |
| Gm42418.5   | 0.00021714 | -0.5488926 | 1     | 1     | 1          | 17 |
| mt-Nd4.8    | 0.00048784 | -0.6068523 | 0.778 | 0.702 | 1          | 17 |
| H2-Aa.10    | 2.98E-19   | -1.4810391 | 0.536 | 0.746 | 4.91E-15   | 14 |
| Foxp1.10    | 0.00954781 | -0.7667292 | 0.13  | 0.267 | 1          | 17 |
| H2-DMb1.10  | 1.10E-19   | -1.4908141 | 0.016 | 0.336 | 1.80E-15   | 12 |
| Jund.12     | 0.00097245 | -0.8283655 | 0.722 | 0.682 | 1          | 17 |
| Zfp36l1.12  | 0.00070961 | -0.8701322 | 0.407 | 0.529 | 1          | 17 |
| Zfp36l2.7   | 0.00627303 | -0.873381  | 0.259 | 0.381 | 1          | 17 |
| Itm2b.14    | 8.28E-05   | -0.90895   | 0.907 | 0.787 | 1          | 17 |
| Shisa5.12   | 0.0042999  | -0.9591256 | 0.389 | 0.452 | 1          | 17 |
| Neat1.14    | 0.00577507 | -0.9625705 | 0.185 | 0.328 | 1          | 17 |
| Serinc3.13  | 0.00343326 | -0.9998493 | 0.222 | 0.358 | 1          | 17 |
| Emp3.10     | 5.04E-05   | -1.0981606 | 0.222 | 0.435 | 0.82917459 | 17 |
| Lgals1.13   | 0.00084536 | -1.1144339 | 0.241 | 0.404 | 1          | 17 |
| Ehd4.14     | 0.00010119 | -1.117307  | 0.037 | 0.268 | 1          | 17 |
| Ptprcap.15  | 0.00072521 | -1.1349167 | 0.074 | 0.266 | 1          | 17 |
| Cd81.8      | 2.08E-05   | -1.1594951 | 0.019 | 0.287 | 0.34295527 | 17 |
| Marcksl1.14 | 0.00096754 | -1.2367145 | 0.278 | 0.436 | 1          | 17 |
| Mafb.15     | 0.00017441 | -1.2768068 | 0.037 | 0.265 | 1          | 17 |
| Ctsd.14     | 7.41E-05   | -1.2821287 | 0.056 | 0.292 | 1          | 17 |
| Klf6.12     | 4.97E-05   | -1.3049185 | 0.389 | 0.531 | 0.81741939 | 17 |
| Cd37.12     | 1.02E-05   | -1.3770836 | 0.056 | 0.332 | 0.16832719 | 17 |
| Csf1r.16    | 0.0006101  | -1.3827135 | 0.148 | 0.334 | 1          | 17 |
| Ly6d.14     | 0.00386167 | -1.3886069 | 0.167 | 0.309 | 1          | 17 |
| Pltp.16     | 0.00177625 | -1.3888102 | 0.185 | 0.338 | 1          | 17 |
| Cd14.16     | 0.00012652 | -1.4273769 | 0.037 | 0.262 | 1          | 17 |
| Cebpb.15    | 2.49E-05   | -1.4385886 | 0.074 | 0.331 | 0.40957382 | 17 |
| Ifi27l2a.14 | 8.30E-05   | -1.474886  | 0.185 | 0.404 | 1          | 17 |
| Ahnak.11    | 3.57E-08   | -1.4776196 | 0.222 | 0.549 | 0.00058649 | 17 |
| Klf4.13     | 0.00069471 | -1.590648  | 0.222 | 0.376 | 1          | 17 |
| Ighm.13     | 0.00952486 | -1.6055957 | 0.352 | 0.415 | 1          | 17 |
| F13a1.15    | 1.86E-05   | -1.7068654 | 0.019 | 0.281 | 0.30580192 | 17 |
| Mrc1.16     | 1.22E-05   | -1.7112039 | 0.037 | 0.308 | 0.20104177 | 17 |
| Klf2.14     | 5.45E-10   | -1.7568168 | 0.204 | 0.597 | 8.96E-06   | 17 |
| Ccl6.16     | 2.33E-05   | -1.8000569 | 0.185 | 0.414 | 0.38257487 | 17 |
| Cd79a.15    | 0.00018842 | -2.0116155 | 0.037 | 0.253 | 1          | 17 |

|            |            |            |       |       |            |    |
|------------|------------|------------|-------|-------|------------|----|
| Selenop.16 | 3.16E-06   | -2.0952587 | 0.13  | 0.418 | 0.05190432 | 17 |
| Lyz2.16    | 0.00038261 | -2.1473486 | 0.537 | 0.555 | 1          | 17 |
| Ccl2.16    | 1.70E-05   | -2.1803498 | 0.019 | 0.283 | 0.28003902 | 17 |
| C1qc.16    | 1.72E-05   | -2.4276858 | 0.074 | 0.336 | 0.28323831 | 17 |
| Pf4.17     | 1.24E-05   | -2.4290876 | 0.037 | 0.308 | 0.20328242 | 17 |
| C1qa.16    | 1.33E-06   | -2.5517133 | 0.019 | 0.332 | 0.02183605 | 17 |
| C1qb.16    | 2.37E-06   | -2.7094229 | 0.056 | 0.354 | 0.03903373 | 17 |
| Apoe.15    | 9.17E-09   | -3.4798269 | 0.093 | 0.473 | 0.00015086 | 17 |
| Nr1h3      | 0          | 1.32972196 | 0.571 | 0.003 | 0          | 18 |
| Colq       | 0          | 0.87251309 | 0.286 | 0     | 0          | 18 |
| H2-Ab1.11  | 1.89E-17   | -1.4964819 | 0.361 | 0.713 | 3.10E-13   | 15 |
| Cxcl9      | 3.52E-146  | 1.48571507 | 0.486 | 0.01  | 5.79E-142  | 18 |
| Il18bp     | 2.31E-133  | 1.22945976 | 0.429 | 0.008 | 3.79E-129  | 18 |
| Hebp1      | 1.81E-127  | 1.26251657 | 0.514 | 0.013 | 2.97E-123  | 18 |
| Cxcl13     | 5.08E-111  | 3.33628147 | 0.714 | 0.032 | 8.36E-107  | 18 |
| Mmp14      | 1.93E-104  | 0.85076301 | 0.371 | 0.008 | 3.17E-100  | 18 |
| Fabp5.1    | 3.13E-101  | 2.7005716  | 0.971 | 0.068 | 5.14E-97   | 18 |
| C3         | 4.33E-97   | 2.34137886 | 0.714 | 0.037 | 7.12E-93   | 18 |
| Phyhd1     | 8.66E-78   | 0.56979535 | 0.257 | 0.005 | 1.42E-73   | 18 |
| Dnase1l3   | 5.62E-67   | 1.28341966 | 0.429 | 0.018 | 9.25E-63   | 18 |
| Fam26f     | 6.78E-65   | 1.14318311 | 0.486 | 0.024 | 1.12E-60   | 18 |
| Gdf15      | 8.28E-62   | 1.78992136 | 0.4   | 0.017 | 1.36E-57   | 18 |
| Vcam1      | 9.26E-56   | 1.13169385 | 0.629 | 0.045 | 1.52E-51   | 18 |
| Cxcl16.3   | 6.46E-46   | 1.44103116 | 0.857 | 0.108 | 1.06E-41   | 18 |
| Apobec1    | 7.73E-43   | 1.33849131 | 0.714 | 0.077 | 1.27E-38   | 18 |
| Acp2       | 1.93E-42   | 0.91354324 | 0.543 | 0.044 | 3.18E-38   | 18 |
| Snx24      | 8.07E-38   | 0.59569147 | 0.286 | 0.014 | 1.33E-33   | 18 |
| Lag3.1     | 1.58E-36   | 0.77152334 | 0.343 | 0.021 | 2.60E-32   | 18 |
| Fam20c     | 1.79E-34   | 0.80920567 | 0.314 | 0.019 | 2.94E-30   | 18 |
| Aif1.4     | 4.16E-34   | 1.46040562 | 0.971 | 0.197 | 6.84E-30   | 18 |
| Cd63.3     | 3.21E-31   | 1.64159674 | 0.943 | 0.208 | 5.29E-27   | 18 |
| Fcgr4      | 4.43E-31   | 0.83454794 | 0.343 | 0.025 | 7.29E-27   | 18 |
| Slamf8     | 1.35E-30   | 0.87201672 | 0.457 | 0.044 | 2.22E-26   | 18 |
| Ccl8.2     | 2.03E-30   | 2.91699341 | 0.8   | 0.158 | 3.34E-26   | 18 |
| Anpep.2    | 2.80E-30   | 0.90789699 | 0.371 | 0.03  | 4.60E-26   | 18 |
| Rgs1.3     | 4.49E-30   | 0.8803081  | 0.771 | 0.114 | 7.38E-26   | 18 |
| Ms4a7.1    | 1.44E-29   | 1.34480368 | 0.771 | 0.124 | 2.37E-25   | 18 |
| Acp5.1     | 1.54E-29   | 1.07368323 | 0.657 | 0.09  | 2.53E-25   | 18 |
| Pla2g7.2   | 6.44E-29   | 1.17264556 | 0.743 | 0.117 | 1.06E-24   | 18 |
| Cd300c2.2  | 1.28E-27   | 1.13794528 | 0.629 | 0.09  | 2.11E-23   | 18 |
| Tmem86a    | 2.77E-27   | 0.67777003 | 0.371 | 0.032 | 4.56E-23   | 18 |
| Tspan3.1   | 4.40E-27   | 0.96703922 | 0.629 | 0.089 | 7.24E-23   | 18 |
| C1qb.17    | 6.48E-27   | 1.57635739 | 1     | 0.35  | 1.07E-22   | 18 |

|             |          |            |       |       |          |    |
|-------------|----------|------------|-------|-------|----------|----|
| Pla2g2d.1   | 1.89E-26 | 1.48957421 | 0.571 | 0.081 | 3.11E-22 | 18 |
| Pdlim4      | 4.33E-26 | 0.80131521 | 0.371 | 0.034 | 7.12E-22 | 18 |
| C1qa.17     | 1.57E-25 | 1.53355004 | 1     | 0.327 | 2.58E-21 | 18 |
| Lgals3bp    | 2.76E-25 | 1.02569331 | 0.686 | 0.11  | 4.54E-21 | 18 |
| Rab20       | 2.72E-24 | 0.8386477  | 0.486 | 0.059 | 4.47E-20 | 18 |
| Aoah        | 4.96E-24 | 0.64887096 | 0.4   | 0.041 | 8.16E-20 | 18 |
| Pld3        | 1.67E-23 | 1.08341507 | 0.657 | 0.11  | 2.74E-19 | 18 |
| Slc25a33    | 2.12E-23 | 0.70341967 | 0.314 | 0.028 | 3.48E-19 | 18 |
| Ctsz.11     | 2.85E-23 | 1.38868836 | 1     | 0.35  | 4.70E-19 | 18 |
| Creb5       | 6.59E-23 | 0.52048931 | 0.286 | 0.023 | 1.08E-18 | 18 |
| Axl         | 7.44E-23 | 0.82131833 | 0.429 | 0.05  | 1.22E-18 | 18 |
| C1qc.17     | 1.85E-22 | 1.3587679  | 1     | 0.331 | 3.05E-18 | 18 |
| Lpcat2.2    | 1.10E-21 | 0.64306454 | 0.371 | 0.04  | 1.81E-17 | 18 |
| Tmem37      | 3.02E-21 | 0.80455633 | 0.314 | 0.03  | 4.97E-17 | 18 |
| Il1rn       | 6.55E-21 | 0.71887856 | 0.286 | 0.026 | 1.08E-16 | 18 |
| Ctss.13     | 1.09E-20 | 1.56005514 | 0.971 | 0.499 | 1.80E-16 | 18 |
| Tnfaip2.1   | 1.11E-20 | 0.74956966 | 0.4   | 0.049 | 1.82E-16 | 18 |
| Tnfsf13.1   | 1.33E-20 | 1.00306793 | 0.457 | 0.064 | 2.18E-16 | 18 |
| Plbd2       | 2.13E-20 | 0.77420412 | 0.486 | 0.069 | 3.50E-16 | 18 |
| Slamf7.5    | 2.98E-20 | 0.94305429 | 0.657 | 0.125 | 4.91E-16 | 18 |
| Psap.14     | 4.13E-20 | 1.37981908 | 1     | 0.675 | 6.80E-16 | 18 |
| Stard9      | 2.85E-19 | 0.5828673  | 0.314 | 0.033 | 4.70E-15 | 18 |
| Lst1.2      | 8.65E-19 | 0.79574831 | 0.8   | 0.175 | 1.42E-14 | 18 |
| Tmem106a.1  | 1.57E-18 | 0.91158302 | 0.571 | 0.103 | 2.59E-14 | 18 |
| Tspan4      | 1.69E-18 | 0.58931027 | 0.286 | 0.029 | 2.78E-14 | 18 |
| Lamp1.15    | 2.16E-18 | 1.1073268  | 1     | 0.412 | 3.55E-14 | 18 |
| Fscn1.1     | 2.53E-18 | 0.32928727 | 0.257 | 0.024 | 4.16E-14 | 18 |
| Atp6v0c.11  | 4.97E-18 | 1.16729414 | 1     | 0.421 | 8.18E-14 | 18 |
| Acvrl1      | 5.14E-18 | 0.64159449 | 0.371 | 0.047 | 8.45E-14 | 18 |
| H2-DMb1.8   | 1.85E-31 | -1.5066531 | 0.007 | 0.341 | 3.05E-27 | 10 |
| P2rx4       | 7.08E-18 | 0.71808586 | 0.6   | 0.109 | 1.16E-13 | 18 |
| Itgax.1     | 7.15E-18 | 0.88648561 | 0.429 | 0.064 | 1.18E-13 | 18 |
| Mitf        | 1.02E-17 | 0.5384512  | 0.286 | 0.03  | 1.67E-13 | 18 |
| Rasa4       | 1.10E-17 | 0.83110197 | 0.486 | 0.08  | 1.81E-13 | 18 |
| Bcl2a1a.3   | 1.35E-17 | 0.7336078  | 0.457 | 0.07  | 2.23E-13 | 18 |
| Ctsb.16     | 2.52E-17 | 1.33403402 | 1     | 0.474 | 4.15E-13 | 18 |
| Tmem176a.12 | 6.10E-17 | 1.15300267 | 0.914 | 0.331 | 1.00E-12 | 18 |
| Mtmr10      | 8.81E-17 | 0.53694196 | 0.257 | 0.026 | 1.45E-12 | 18 |
| Sirpa.3     | 1.20E-16 | 1.01994458 | 0.743 | 0.185 | 1.97E-12 | 18 |
| Ninj1.8     | 1.51E-16 | 0.94596912 | 0.857 | 0.24  | 2.48E-12 | 18 |
| Il4i1.1     | 1.80E-16 | 0.50652642 | 0.286 | 0.032 | 2.96E-12 | 18 |
| Cstb.10     | 2.25E-16 | 1.23064915 | 0.829 | 0.255 | 3.70E-12 | 18 |
| Cd68.13     | 2.32E-16 | 1.09949279 | 0.857 | 0.269 | 3.82E-12 | 18 |

|             |          |            |       |       |          |    |
|-------------|----------|------------|-------|-------|----------|----|
| Fth1.15     | 2.53E-16 | 1.19677364 | 1     | 0.958 | 4.17E-12 | 18 |
| Ccrl2.1     | 3.79E-16 | 1.62081887 | 0.429 | 0.075 | 6.24E-12 | 18 |
| Cd302       | 3.91E-16 | 0.88437438 | 0.514 | 0.095 | 6.44E-12 | 18 |
| Itm2c.3     | 4.05E-16 | 0.77355263 | 0.829 | 0.207 | 6.66E-12 | 18 |
| Cd300ld3    | 4.75E-16 | 0.6598629  | 0.314 | 0.039 | 7.82E-12 | 18 |
| Rnf149.1    | 5.12E-16 | 0.82749727 | 0.543 | 0.102 | 8.43E-12 | 18 |
| Ppt2        | 8.46E-16 | 0.59448241 | 0.343 | 0.046 | 1.39E-11 | 18 |
| H2-DMa.7    | 2.81E-25 | -1.5076644 | 0.038 | 0.435 | 4.63E-21 | 12 |
| Cebpa       | 1.77E-15 | 0.79929059 | 0.457 | 0.079 | 2.90E-11 | 18 |
| Lgmn.15     | 1.97E-15 | 0.86825163 | 0.943 | 0.276 | 3.23E-11 | 18 |
| Camk1.1     | 2.24E-15 | 0.64575184 | 0.514 | 0.094 | 3.68E-11 | 18 |
| Slc15a3     | 2.43E-15 | 0.56551879 | 0.314 | 0.04  | 4.00E-11 | 18 |
| Anxa4.1     | 2.96E-15 | 0.80254936 | 0.429 | 0.072 | 4.87E-11 | 18 |
| Fam213b     | 3.70E-15 | 0.76647743 | 0.429 | 0.071 | 6.09E-11 | 18 |
| Ccl12.1     | 4.51E-15 | 0.66306104 | 0.543 | 0.107 | 7.43E-11 | 18 |
| Cd74.13     | 5.71E-15 | 0.89521236 | 0.971 | 0.826 | 9.39E-11 | 18 |
| Amdhd2      | 6.81E-15 | 0.48822274 | 0.343 | 0.047 | 1.12E-10 | 18 |
| Clic4.14    | 7.17E-15 | 0.75696018 | 0.886 | 0.249 | 1.18E-10 | 18 |
| Clec4a3.1   | 1.28E-14 | 0.86661373 | 0.543 | 0.114 | 2.11E-10 | 18 |
| Csf2rb.4    | 1.87E-14 | 0.83222816 | 0.571 | 0.122 | 3.07E-10 | 18 |
| Pirb.2      | 1.91E-14 | 0.70079089 | 0.6   | 0.129 | 3.14E-10 | 18 |
| Il11ra1     | 2.80E-14 | 0.56188166 | 0.286 | 0.036 | 4.61E-10 | 18 |
| Hpgds       | 3.55E-14 | 0.68520854 | 0.343 | 0.05  | 5.84E-10 | 18 |
| Cyba.8      | 3.65E-14 | 0.91068435 | 1     | 0.716 | 6.00E-10 | 18 |
| St8sia6     | 4.27E-14 | 0.68371837 | 0.286 | 0.038 | 7.02E-10 | 18 |
| Gngt2.2     | 4.85E-14 | 0.77032717 | 0.514 | 0.103 | 7.98E-10 | 18 |
| Cd81.9      | 5.74E-14 | 0.93955967 | 0.886 | 0.283 | 9.44E-10 | 18 |
| Cxcl10      | 6.20E-14 | 1.39920542 | 0.286 | 0.039 | 1.02E-09 | 18 |
| H2-Eb1.10   | 5.47E-18 | -1.5260358 | 0.351 | 0.713 | 8.99E-14 | 15 |
| Bcl2a1b.6   | 8.88E-14 | 0.87689715 | 0.714 | 0.197 | 1.46E-09 | 18 |
| Lgals3.16   | 9.70E-14 | 1.30839941 | 0.886 | 0.347 | 1.60E-09 | 18 |
| Lyz2.17     | 1.34E-13 | 0.97062645 | 1     | 0.553 | 2.21E-09 | 18 |
| Efhd2.13    | 2.26E-13 | 0.6971195  | 0.943 | 0.293 | 3.72E-09 | 18 |
| Syngt2.11   | 2.29E-13 | 0.86382014 | 0.8   | 0.245 | 3.76E-09 | 18 |
| Lair1       | 2.58E-13 | 0.48233118 | 0.343 | 0.052 | 4.24E-09 | 18 |
| Sdc3.3      | 3.09E-13 | 0.77086243 | 0.657 | 0.168 | 5.08E-09 | 18 |
| Litaf.9     | 3.17E-13 | 0.7616962  | 0.857 | 0.261 | 5.21E-09 | 18 |
| Slc11a1     | 3.36E-13 | 0.60766466 | 0.4   | 0.069 | 5.52E-09 | 18 |
| Basp1.3     | 3.58E-13 | 0.72175356 | 0.429 | 0.08  | 5.89E-09 | 18 |
| Slc31a2     | 5.03E-13 | 0.46929026 | 0.257 | 0.033 | 8.27E-09 | 18 |
| Itm2b.15    | 7.00E-13 | 0.95318978 | 1     | 0.786 | 1.15E-08 | 18 |
| Tmem176b.13 | 8.04E-13 | 1.07437559 | 0.914 | 0.437 | 1.32E-08 | 18 |
| Fcgr3.4     | 1.40E-12 | 0.75964852 | 0.771 | 0.224 | 2.30E-08 | 18 |

|             |          |            |       |       |          |    |
|-------------|----------|------------|-------|-------|----------|----|
| Ifrd1.5     | 1.70E-12 | 0.89512658 | 0.771 | 0.238 | 2.79E-08 | 18 |
| Pim3        | 2.10E-12 | 0.50596553 | 0.429 | 0.081 | 3.46E-08 | 18 |
| Abcg1       | 2.13E-12 | 0.55959438 | 0.371 | 0.064 | 3.51E-08 | 18 |
| Mpeg1.4     | 2.71E-12 | 0.72313043 | 0.714 | 0.201 | 4.45E-08 | 18 |
| Anxa3.1     | 3.78E-12 | 0.64852412 | 0.371 | 0.066 | 6.21E-08 | 18 |
| Ctsd.15     | 4.10E-12 | 0.86984413 | 0.857 | 0.288 | 6.75E-08 | 18 |
| Naxe        | 4.90E-12 | 0.52548147 | 0.457 | 0.093 | 8.06E-08 | 18 |
| Rogdi.2     | 5.68E-12 | 0.6064491  | 0.371 | 0.067 | 9.35E-08 | 18 |
| Cd300ld     | 6.46E-12 | 0.45803867 | 0.371 | 0.065 | 1.06E-07 | 18 |
| Wfdc17.14   | 7.24E-12 | 0.93408236 | 0.886 | 0.327 | 1.19E-07 | 18 |
| Fam46a.1    | 1.09E-11 | 0.67337909 | 0.543 | 0.128 | 1.80E-07 | 18 |
| Clec4n.1    | 1.17E-11 | 0.57088507 | 0.4   | 0.076 | 1.92E-07 | 18 |
| Grn.13      | 1.36E-11 | 0.75066221 | 0.943 | 0.374 | 2.23E-07 | 18 |
| Ftl1.14     | 1.83E-11 | 0.89665357 | 1     | 0.89  | 3.01E-07 | 18 |
| Vamp5       | 1.97E-11 | 0.41030655 | 0.257 | 0.036 | 3.24E-07 | 18 |
| Plxnb2      | 2.29E-11 | 0.53395876 | 0.486 | 0.106 | 3.76E-07 | 18 |
| Gda.2       | 3.37E-11 | 0.63552114 | 0.514 | 0.121 | 5.54E-07 | 18 |
| Ctsa.14     | 3.53E-11 | 0.66903932 | 0.857 | 0.282 | 5.80E-07 | 18 |
| Tpd52.1     | 4.07E-11 | 0.47054553 | 0.629 | 0.159 | 6.69E-07 | 18 |
| Nagk        | 4.20E-11 | 0.5917922  | 0.314 | 0.054 | 6.91E-07 | 18 |
| Aldh3b1     | 4.72E-11 | 0.50691003 | 0.286 | 0.045 | 7.76E-07 | 18 |
| Pltp.17     | 6.75E-11 | 0.78389335 | 0.914 | 0.334 | 1.11E-06 | 18 |
| Cndp2.1     | 7.36E-11 | 0.5462483  | 0.543 | 0.132 | 1.21E-06 | 18 |
| Polb        | 7.96E-11 | 0.34756735 | 0.314 | 0.053 | 1.31E-06 | 18 |
| Fcgr2b.10   | 8.77E-11 | 0.86233479 | 0.8   | 0.276 | 1.44E-06 | 18 |
| Relb.1      | 9.02E-11 | 0.58514064 | 0.429 | 0.093 | 1.48E-06 | 18 |
| Tank.1      | 1.25E-10 | 0.41778011 | 0.343 | 0.063 | 2.06E-06 | 18 |
| Nfe2l2.3    | 1.30E-10 | 0.79206036 | 0.629 | 0.19  | 2.13E-06 | 18 |
| Daglb       | 1.70E-10 | 0.45339457 | 0.371 | 0.072 | 2.80E-06 | 18 |
| Fgr.2       | 2.41E-10 | 0.39813375 | 0.343 | 0.064 | 3.96E-06 | 18 |
| Scarb2      | 3.71E-10 | 0.68176229 | 0.486 | 0.121 | 6.10E-06 | 18 |
| Insig1      | 4.36E-10 | 0.33705379 | 0.257 | 0.04  | 7.17E-06 | 18 |
| Ldlr        | 5.06E-10 | 0.52063119 | 0.286 | 0.05  | 8.33E-06 | 18 |
| Mrpl13      | 5.50E-10 | 0.47705888 | 0.314 | 0.058 | 9.04E-06 | 18 |
| Cd300a.2    | 6.92E-10 | 0.471974   | 0.4   | 0.086 | 1.14E-05 | 18 |
| Oxct1       | 8.76E-10 | 0.69393664 | 0.486 | 0.126 | 1.44E-05 | 18 |
| Lmna.4      | 8.86E-10 | 0.71563143 | 0.657 | 0.21  | 1.46E-05 | 18 |
| Plbd1.9     | 8.87E-10 | 0.67526338 | 0.714 | 0.238 | 1.46E-05 | 18 |
| 0610012G03R | 9.83E-10 | 0.5181525  | 0.457 | 0.109 | 1.62E-05 | 18 |
| Echs1       | 9.89E-10 | 0.45746428 | 0.286 | 0.05  | 1.63E-05 | 18 |
| Rab7b.1     | 1.05E-09 | 0.63807947 | 0.4   | 0.09  | 1.72E-05 | 18 |
| Edem2.1     | 1.19E-09 | 0.49660433 | 0.314 | 0.06  | 1.95E-05 | 18 |
| Mafb.16     | 1.35E-09 | 0.56830122 | 0.771 | 0.261 | 2.22E-05 | 18 |



|            |          |            |       |       |            |    |
|------------|----------|------------|-------|-------|------------|----|
| Anxa5.11   | 1.47E-09 | 0.92454196 | 0.829 | 0.34  | 2.41E-05   | 18 |
| Clec4a1.2  | 1.59E-09 | 0.47687206 | 0.486 | 0.118 | 2.62E-05   | 18 |
| Serpina3g  | 1.61E-09 | 0.51679946 | 0.286 | 0.051 | 2.65E-05   | 18 |
| Rps7.8     | 1.76E-09 | -0.8917569 | 0.943 | 0.941 | 2.90E-05   | 18 |
| Hexa.13    | 1.77E-09 | 0.61277767 | 0.8   | 0.289 | 2.92E-05   | 18 |
| H2-DMa.6   | 2.53E-42 | -1.6102898 | 0.02  | 0.442 | 4.15E-38   | 10 |
| Strn4      | 1.97E-09 | 0.34430991 | 0.286 | 0.051 | 3.24E-05   | 18 |
| Timp2.2    | 2.15E-09 | 0.39698533 | 0.686 | 0.2   | 3.54E-05   | 18 |
| Slc3a2.3   | 2.25E-09 | 0.53553752 | 0.686 | 0.215 | 3.71E-05   | 18 |
| Rilpl2.3   | 2.97E-09 | 0.56673309 | 0.686 | 0.215 | 4.89E-05   | 18 |
| Ftl1-ps1.1 | 3.32E-09 | 0.60512747 | 0.486 | 0.127 | 5.46E-05   | 18 |
| Rps14.4    | 3.41E-09 | -0.7958691 | 0.886 | 0.93  | 5.61E-05   | 18 |
| Cfp.15     | 3.45E-09 | 0.66078666 | 0.829 | 0.309 | 5.68E-05   | 18 |
| Stat1.4    | 3.62E-09 | 0.64921244 | 0.571 | 0.169 | 5.96E-05   | 18 |
| Klhdc3     | 4.02E-09 | 0.47014974 | 0.257 | 0.044 | 6.61E-05   | 18 |
| Nfil3.3    | 4.11E-09 | 0.60712149 | 0.429 | 0.105 | 6.75E-05   | 18 |
| Rpl13.8    | 4.19E-09 | -0.7256345 | 1     | 0.981 | 6.89E-05   | 18 |
| Rpl8.9     | 4.27E-09 | -0.8908199 | 1     | 0.916 | 7.02E-05   | 18 |
| Unc93b1.8  | 4.84E-09 | 0.6633677  | 1     | 0.461 | 7.97E-05   | 18 |
| Dhrs1      | 4.92E-09 | 0.49731713 | 0.314 | 0.063 | 8.09E-05   | 18 |
| Tpt1.3     | 5.69E-09 | -0.6095801 | 0.971 | 0.983 | 9.36E-05   | 18 |
| Tcirg1     | 6.12E-09 | 0.45047078 | 0.343 | 0.072 | 0.00010063 | 18 |
| Rpl36.9    | 6.15E-09 | -0.8426767 | 0.943 | 0.899 | 0.00010119 | 18 |
| Rpsa.11    | 6.20E-09 | -0.9483737 | 1     | 0.935 | 0.00010194 | 18 |
| Rps15a.10  | 6.21E-09 | -0.8303881 | 0.971 | 0.95  | 0.00010215 | 18 |
| Frmd4b     | 6.74E-09 | 0.48664041 | 0.4   | 0.093 | 0.00011084 | 18 |
| Npc2.13    | 6.82E-09 | 0.64883058 | 0.943 | 0.51  | 0.00011214 | 18 |
| Med29.1    | 7.11E-09 | 0.42952345 | 0.314 | 0.063 | 0.00011695 | 18 |
| Coro1b.4   | 8.08E-09 | 0.57773553 | 0.714 | 0.242 | 0.00013295 | 18 |
| Akr1a1.11  | 9.29E-09 | 0.6028249  | 0.857 | 0.35  | 0.00015283 | 18 |
| Rps3a1.8   | 9.39E-09 | -0.7025645 | 0.971 | 0.964 | 0.00015448 | 18 |
| Igsf6      | 1.02E-08 | 0.30101749 | 0.286 | 0.053 | 0.00016736 | 18 |
| Fcer1g.14  | 1.23E-08 | 0.68795985 | 1     | 0.575 | 0.00020176 | 18 |
| Cd38.1     | 1.27E-08 | 0.35485633 | 0.457 | 0.113 | 0.00020932 | 18 |
| Gm5617     | 1.30E-08 | 0.52114048 | 0.257 | 0.047 | 0.00021403 | 18 |
| Rgs10.12   | 1.31E-08 | 0.53380415 | 0.771 | 0.273 | 0.00021532 | 18 |
| Atox1.17   | 1.36E-08 | 0.64115237 | 0.943 | 0.454 | 0.00022314 | 18 |
| Dctn2      | 1.36E-08 | 0.39222051 | 0.4   | 0.094 | 0.00022363 | 18 |
| Il1b.11    | 1.39E-08 | 0.76314776 | 0.657 | 0.243 | 0.00022924 | 18 |
| Rps5.9     | 1.40E-08 | -0.7180959 | 0.971 | 0.962 | 0.0002309  | 18 |
| Lrp1.2     | 1.43E-08 | 0.61077989 | 0.486 | 0.131 | 0.00023589 | 18 |
| Cd14.17    | 1.46E-08 | 0.45265827 | 0.771 | 0.258 | 0.00024014 | 18 |
| Iscu.2     | 1.50E-08 | 0.56748951 | 0.6   | 0.189 | 0.00024643 | 18 |

|             |           |            |       |       |            |    |
|-------------|-----------|------------|-------|-------|------------|----|
| Mdfic.1     | 1.52E-08  | 0.63822568 | 0.343 | 0.076 | 0.00025066 | 18 |
| Sat1.11     | 1.86E-08  | 0.68372455 | 0.829 | 0.337 | 0.00030604 | 18 |
| Pgap2.1     | 2.03E-08  | 0.4474151  | 0.257 | 0.047 | 0.00033368 | 18 |
| Cxcr4       | 2.03E-08  | 0.29916154 | 0.343 | 0.074 | 0.00033371 | 18 |
| Rps16.6     | 2.05E-08  | -0.673069  | 1     | 0.974 | 0.00033693 | 18 |
| Glul.2      | 2.08E-08  | 0.2772681  | 0.714 | 0.22  | 0.00034198 | 18 |
| H2-Aa.4     | 7.11E-153 | -1.709995  | 0.343 | 0.781 | 1.17E-148  | 4  |
| Gbp2        | 2.14E-08  | 0.92227799 | 0.257 | 0.05  | 0.00035192 | 18 |
| Rps27.11    | 2.16E-08  | -0.9361819 | 0.914 | 0.902 | 0.00035453 | 18 |
| 1-Mar       | 2.31E-08  | 0.28823819 | 0.314 | 0.064 | 0.00037929 | 18 |
| Abhd12.1    | 2.95E-08  | 0.48761765 | 0.486 | 0.131 | 0.00048513 | 18 |
| Bcat2       | 2.95E-08  | 0.44642808 | 0.286 | 0.058 | 0.0004857  | 18 |
| Vim.14      | 3.01E-08  | 0.74224957 | 1     | 0.62  | 0.00049588 | 18 |
| Plk2        | 3.03E-08  | 0.27749218 | 0.286 | 0.056 | 0.00049824 | 18 |
| Sash1       | 3.68E-08  | 0.30685867 | 0.343 | 0.075 | 0.00060494 | 18 |
| P2ry6.1     | 3.70E-08  | 0.56565703 | 0.429 | 0.113 | 0.00060893 | 18 |
| App.11      | 4.08E-08  | 0.55831416 | 0.743 | 0.272 | 0.00067147 | 18 |
| Herpud1.5   | 4.12E-08  | 0.44943825 | 0.6   | 0.184 | 0.0006773  | 18 |
| Gm36161.1   | 4.17E-08  | 0.47121344 | 0.371 | 0.088 | 0.00068526 | 18 |
| Hexb.1      | 4.57E-08  | 0.52381108 | 0.514 | 0.147 | 0.00075167 | 18 |
| Pld4.12     | 4.91E-08  | 0.57247114 | 0.829 | 0.323 | 0.00080843 | 18 |
| Ly86.12     | 4.99E-08  | 0.64159741 | 0.8   | 0.316 | 0.00082027 | 18 |
| Filip1l.1   | 5.11E-08  | 0.52539309 | 0.343 | 0.079 | 0.00084006 | 18 |
| Fau.5       | 5.14E-08  | -0.5392261 | 1     | 0.992 | 0.00084539 | 18 |
| Gns.2       | 5.37E-08  | 0.62287973 | 0.514 | 0.156 | 0.0008831  | 18 |
| Leprot      | 5.46E-08  | 0.49085323 | 0.371 | 0.09  | 0.00089735 | 18 |
| Asah1.2     | 5.76E-08  | 0.4275238  | 0.543 | 0.159 | 0.00094811 | 18 |
| Myo5a.1     | 5.83E-08  | 0.3687937  | 0.457 | 0.121 | 0.00095946 | 18 |
| Ifngr2      | 6.20E-08  | 0.47897033 | 0.371 | 0.09  | 0.00101982 | 18 |
| AW112010.12 | 6.21E-08  | 0.25174727 | 0.743 | 0.259 | 0.00102106 | 18 |
| Myof        | 7.06E-08  | 0.61280958 | 0.343 | 0.083 | 0.00116196 | 18 |
| Rabep1      | 8.19E-08  | 0.33258968 | 0.343 | 0.078 | 0.00134774 | 18 |
| Gpr137b.1   | 8.41E-08  | 0.40730085 | 0.257 | 0.05  | 0.00138347 | 18 |
| Rpl37a.3    | 8.56E-08  | -0.7122636 | 0.886 | 0.94  | 0.00140779 | 18 |
| Clec4a2.2   | 8.77E-08  | 0.41459669 | 0.457 | 0.124 | 0.00144323 | 18 |
| Csf2ra.6    | 8.84E-08  | 0.50789813 | 0.486 | 0.144 | 0.00145337 | 18 |
| Batf3.3     | 1.00E-07  | 0.4480967  | 0.4   | 0.104 | 0.00164423 | 18 |
| Rpl32.8     | 1.05E-07  | -0.7005875 | 0.914 | 0.949 | 0.00172111 | 18 |
| Cebpb.16    | 1.11E-07  | 0.41197683 | 0.857 | 0.327 | 0.00183084 | 18 |
| M6pr.2      | 1.17E-07  | 0.60858884 | 0.543 | 0.176 | 0.00192683 | 18 |
| Rpl18a.8    | 1.18E-07  | -0.7072347 | 0.943 | 0.962 | 0.00193312 | 18 |
| Uap1l1      | 1.33E-07  | 0.376862   | 0.286 | 0.061 | 0.00218375 | 18 |
| Lpin2       | 1.33E-07  | 0.39703749 | 0.314 | 0.071 | 0.00218883 | 18 |

|            |          |            |       |       |            |    |
|------------|----------|------------|-------|-------|------------|----|
| Vma21      | 1.38E-07 | 0.2841656  | 0.314 | 0.069 | 0.00226833 | 18 |
| Vat1       | 1.38E-07 | 0.43138157 | 0.314 | 0.071 | 0.00226907 | 18 |
| Csf1r.17   | 1.46E-07 | 0.25935865 | 0.914 | 0.33  | 0.00240322 | 18 |
| Nrp2.1     | 1.65E-07 | 0.44588311 | 0.286 | 0.062 | 0.00272156 | 18 |
| Dnajb14    | 1.67E-07 | 0.559421   | 0.314 | 0.074 | 0.00273934 | 18 |
| Rrad       | 1.74E-07 | 0.42816611 | 0.286 | 0.062 | 0.00285918 | 18 |
| Selenop.17 | 2.00E-07 | 0.4121316  | 0.943 | 0.414 | 0.00329053 | 18 |
| Ndufb8.3   | 2.00E-07 | 0.50434761 | 0.714 | 0.261 | 0.00329207 | 18 |
| Glrx       | 2.05E-07 | 0.46726568 | 0.314 | 0.074 | 0.00337151 | 18 |
| Sdc4.1     | 2.49E-07 | 0.37851818 | 0.6   | 0.196 | 0.00410037 | 18 |
| Mcur1      | 2.56E-07 | 0.43896132 | 0.314 | 0.074 | 0.00420948 | 18 |
| Ppp1r12c   | 2.57E-07 | 0.26181426 | 0.314 | 0.071 | 0.00422266 | 18 |
| Capza2.7   | 2.59E-07 | 0.43217471 | 0.714 | 0.256 | 0.00425607 | 18 |
| Lrpap1     | 2.94E-07 | 0.45457441 | 0.314 | 0.074 | 0.00483112 | 18 |
| Rpl18.7    | 3.06E-07 | -0.7122488 | 0.971 | 0.923 | 0.00504162 | 18 |
| Med10      | 3.44E-07 | 0.37482586 | 0.314 | 0.074 | 0.00566185 | 18 |
| Prpf38b    | 3.44E-07 | 0.37911743 | 0.371 | 0.096 | 0.00566469 | 18 |
| Prex1.2    | 3.57E-07 | 0.30995728 | 0.514 | 0.152 | 0.00586543 | 18 |
| Soat1.1    | 3.87E-07 | 0.27136678 | 0.314 | 0.073 | 0.0063683  | 18 |
| Gltp.10    | 4.07E-07 | 0.51874631 | 0.686 | 0.256 | 0.00669068 | 18 |
| Rps3.9     | 4.28E-07 | -0.686698  | 1     | 0.913 | 0.00703868 | 18 |
| S100a1     | 4.29E-07 | 0.45391925 | 0.371 | 0.099 | 0.00705386 | 18 |
| Rgl1.2     | 4.47E-07 | 0.34755022 | 0.371 | 0.095 | 0.00735024 | 18 |
| Pmp22.2    | 4.50E-07 | 0.35554928 | 0.371 | 0.095 | 0.00739978 | 18 |
| Rpl34.7    | 4.53E-07 | -0.5829953 | 0.971 | 0.946 | 0.00744915 | 18 |
| Ak2.1      | 4.54E-07 | 0.38334369 | 0.4   | 0.109 | 0.00747463 | 18 |
| Rpl30.7    | 4.58E-07 | -0.6119423 | 0.971 | 0.953 | 0.00753734 | 18 |
| Vps41      | 4.60E-07 | 0.27490089 | 0.257 | 0.053 | 0.00757461 | 18 |
| lah1       | 4.61E-07 | 0.41073423 | 0.286 | 0.065 | 0.00758939 | 18 |
| Atp6ap2    | 5.61E-07 | 0.34069821 | 0.4   | 0.108 | 0.00922473 | 18 |
| Tbxas1     | 5.83E-07 | 0.30847673 | 0.371 | 0.096 | 0.00959094 | 18 |
| Ntan1      | 6.25E-07 | 0.4731016  | 0.4   | 0.113 | 0.01028531 | 18 |
| Rps19.10   | 6.55E-07 | -0.7295543 | 0.943 | 0.933 | 0.01076639 | 18 |
| Pon2       | 7.23E-07 | 0.3632732  | 0.343 | 0.088 | 0.0118892  | 18 |
| Fam173a    | 7.81E-07 | 0.34571842 | 0.371 | 0.099 | 0.01284038 | 18 |
| Cx3cr1.1   | 8.37E-07 | 0.40135035 | 0.286 | 0.066 | 0.01376865 | 18 |
| Tinf2      | 8.43E-07 | 0.35682706 | 0.257 | 0.056 | 0.01387242 | 18 |
| Ptms.14    | 9.04E-07 | 0.43649644 | 0.743 | 0.286 | 0.01486452 | 18 |
| Lpl.1      | 9.45E-07 | 0.69797223 | 0.343 | 0.093 | 0.01554699 | 18 |
| Myo1f.3    | 1.02E-06 | 0.42436366 | 0.429 | 0.126 | 0.0167631  | 18 |
| Rps23.4    | 1.05E-06 | -0.6834916 | 0.914 | 0.896 | 0.01727301 | 18 |
| Rps24.9    | 1.22E-06 | -0.5396579 | 1     | 0.988 | 0.02004886 | 18 |
| Znfx1      | 1.23E-06 | 0.38252837 | 0.257 | 0.058 | 0.02017424 | 18 |

|            |          |            |       |       |            |    |
|------------|----------|------------|-------|-------|------------|----|
| Bri3.13    | 1.27E-06 | 0.53379429 | 0.8   | 0.37  | 0.0208108  | 18 |
| Rrbp1.12   | 1.27E-06 | 0.45335239 | 0.8   | 0.346 | 0.02083135 | 18 |
| Rbm47      | 1.29E-06 | 0.37858924 | 0.286 | 0.067 | 0.02114406 | 18 |
| Atp6v1b2.1 | 1.29E-06 | 0.51117561 | 0.429 | 0.13  | 0.02123072 | 18 |
| Rps8.6     | 1.32E-06 | -0.4989724 | 1     | 0.983 | 0.02168049 | 18 |
| Zfp703     | 1.34E-06 | 0.33093914 | 0.257 | 0.057 | 0.02208855 | 18 |
| Dram2      | 1.37E-06 | 0.27651023 | 0.286 | 0.067 | 0.02257438 | 18 |
| Ifitm2.15  | 1.41E-06 | 0.47408648 | 0.886 | 0.388 | 0.023158   | 18 |
| Pttg1ip    | 1.45E-06 | 0.3457305  | 0.371 | 0.1   | 0.02377187 | 18 |
| Ly9        | 1.46E-06 | 0.34651053 | 0.257 | 0.057 | 0.02402823 | 18 |
| Ccr5       | 1.48E-06 | 0.34833277 | 0.343 | 0.091 | 0.02431217 | 18 |
| Entpd1     | 1.50E-06 | 0.37152529 | 0.257 | 0.058 | 0.02469894 | 18 |
| Creg1.3    | 1.54E-06 | 0.56995382 | 0.571 | 0.203 | 0.02530179 | 18 |
| Rps4x.8    | 1.60E-06 | -0.5309548 | 1     | 0.963 | 0.02638927 | 18 |
| Arl5c.2    | 1.75E-06 | 0.26629254 | 0.286 | 0.067 | 0.02876766 | 18 |
| Vamp8.11   | 1.81E-06 | 0.67452506 | 0.743 | 0.34  | 0.02980883 | 18 |
| Gng2       | 1.87E-06 | 0.39573094 | 0.457 | 0.143 | 0.03070947 | 18 |
| Ap1s1      | 1.92E-06 | 0.38747679 | 0.257 | 0.059 | 0.03151073 | 18 |
| Rps10.6    | 1.99E-06 | -0.5803225 | 0.971 | 0.957 | 0.03274699 | 18 |
| Tpm1       | 2.08E-06 | 0.37773726 | 0.286 | 0.07  | 0.03417831 | 18 |
| Atp6v0b.11 | 2.29E-06 | 0.45254105 | 0.829 | 0.358 | 0.03764347 | 18 |
| Osgep.1    | 2.35E-06 | 0.3609785  | 0.314 | 0.081 | 0.03868293 | 18 |
| Hck.2      | 2.43E-06 | 0.34745956 | 0.343 | 0.093 | 0.03995394 | 18 |
| Ctsl.2     | 2.68E-06 | 0.84250128 | 0.429 | 0.137 | 0.04416111 | 18 |
| Fuca1.1    | 2.78E-06 | 0.28271223 | 0.486 | 0.152 | 0.04573618 | 18 |
| Lrrk1.1    | 3.19E-06 | 0.34069773 | 0.257 | 0.06  | 0.05240652 | 18 |
| Uba52.8    | 3.57E-06 | -0.5502018 | 1     | 0.975 | 0.0586939  | 18 |
| Tex264     | 3.88E-06 | 0.37191831 | 0.257 | 0.061 | 0.06379841 | 18 |
| Sde2       | 4.03E-06 | 0.41937059 | 0.371 | 0.109 | 0.06634156 | 18 |
| Atpif1.16  | 4.13E-06 | 0.44732871 | 0.743 | 0.313 | 0.0679656  | 18 |
| Epsti1.2   | 4.15E-06 | 0.3286593  | 0.543 | 0.187 | 0.06828726 | 18 |
| Cd44.5     | 4.57E-06 | 0.61622248 | 0.514 | 0.191 | 0.07524995 | 18 |
| Znhit1     | 4.66E-06 | 0.52955611 | 0.314 | 0.088 | 0.07663712 | 18 |
| Nfkb2.1    | 4.98E-06 | 0.4129836  | 0.343 | 0.097 | 0.08198945 | 18 |
| Dtnbp1     | 5.07E-06 | 0.2740279  | 0.257 | 0.061 | 0.08342392 | 18 |
| Tyrobp.15  | 5.21E-06 | 0.47276874 | 1     | 0.606 | 0.0857346  | 18 |
| Ubl3.2     | 5.60E-06 | 0.41912902 | 0.6   | 0.22  | 0.09213105 | 18 |
| Hfe.3      | 6.02E-06 | 0.25168375 | 0.371 | 0.106 | 0.09906456 | 18 |
| Bola3      | 6.02E-06 | 0.304185   | 0.343 | 0.096 | 0.0990782  | 18 |
| Srgap2     | 6.38E-06 | 0.29133039 | 0.257 | 0.062 | 0.10487547 | 18 |
| Ctsc.14    | 6.65E-06 | 0.41347174 | 0.857 | 0.413 | 0.10930938 | 18 |
| Rps11.8    | 6.74E-06 | -0.5036874 | 1     | 0.966 | 0.110903   | 18 |
| Dse        | 6.76E-06 | 0.2564706  | 0.314 | 0.083 | 0.11123519 | 18 |

|             |          |            |       |       |            |    |
|-------------|----------|------------|-------|-------|------------|----|
| Tmem256.1   | 8.16E-06 | 0.33837923 | 0.571 | 0.203 | 0.13427788 | 18 |
| Nrros.14    | 8.22E-06 | 0.445924   | 0.714 | 0.282 | 0.13520833 | 18 |
| Adam17      | 8.39E-06 | 0.27208722 | 0.286 | 0.073 | 0.13804529 | 18 |
| Sdcbp.11    | 8.41E-06 | 0.37089498 | 0.686 | 0.273 | 0.13835785 | 18 |
| Gm10076.5   | 8.89E-06 | -0.5053457 | 1     | 0.953 | 0.14625647 | 18 |
| Emc7        | 9.18E-06 | 0.30862918 | 0.371 | 0.112 | 0.15099251 | 18 |
| Rps9.5      | 9.48E-06 | -0.5009711 | 0.971 | 0.963 | 0.15601721 | 18 |
| Rpl10a.7    | 9.57E-06 | -0.664572  | 0.914 | 0.863 | 0.15743644 | 18 |
| Rpl7.6      | 9.85E-06 | -0.6529896 | 0.857 | 0.841 | 0.16198312 | 18 |
| Rpl9-ps6.10 | 9.85E-06 | -0.6329944 | 0.971 | 0.906 | 0.16208523 | 18 |
| Golga4      | 1.05E-05 | 0.28942662 | 0.314 | 0.087 | 0.17345764 | 18 |
| Tmsb10.13   | 1.09E-05 | -1.2475743 | 0.829 | 0.786 | 0.17954658 | 18 |
| Id2.7       | 1.14E-05 | 0.3213828  | 0.571 | 0.213 | 0.18720253 | 18 |
| Lyn.7       | 1.14E-05 | 0.4074766  | 0.6   | 0.24  | 0.18775087 | 18 |
| Cmtm3       | 1.15E-05 | 0.34059895 | 0.286 | 0.076 | 0.18846331 | 18 |
| Cybb.12     | 1.17E-05 | 0.35033998 | 0.771 | 0.327 | 0.19261566 | 18 |
| Qdpr        | 1.19E-05 | 0.36231389 | 0.343 | 0.101 | 0.19502498 | 18 |
| Rpl37.7     | 1.21E-05 | -0.5556779 | 0.943 | 0.929 | 0.19918451 | 18 |
| Sik1        | 1.32E-05 | 0.31514289 | 0.371 | 0.114 | 0.21748219 | 18 |
| Ctnnb1      | 1.33E-05 | 0.52173457 | 0.429 | 0.148 | 0.21859037 | 18 |
| Mcub.1      | 1.41E-05 | 0.31860614 | 0.343 | 0.1   | 0.23259795 | 18 |
| Rps12.5     | 1.55E-05 | -0.5159706 | 0.943 | 0.938 | 0.25497916 | 18 |
| S100a6.12   | 1.60E-05 | -1.1224057 | 0.714 | 0.752 | 0.26289222 | 18 |
| Prdx1.6     | 1.61E-05 | 0.46628299 | 0.8   | 0.378 | 0.26457589 | 18 |
| Tpp1.1      | 1.66E-05 | 0.34598513 | 0.371 | 0.115 | 0.27225129 | 18 |
| Trappc3     | 1.75E-05 | 0.26806072 | 0.257 | 0.065 | 0.28847302 | 18 |
| Pycard.4    | 1.81E-05 | 0.38622452 | 0.543 | 0.203 | 0.29701767 | 18 |
| Lrrc25.2    | 2.04E-05 | 0.62436522 | 0.371 | 0.126 | 0.33530865 | 18 |
| Sgpl1       | 2.06E-05 | 0.28076466 | 0.371 | 0.115 | 0.33876763 | 18 |
| Vdac2.1     | 2.13E-05 | 0.42548101 | 0.571 | 0.228 | 0.35087661 | 18 |
| Xdh         | 2.14E-05 | 0.252238   | 0.257 | 0.066 | 0.35163495 | 18 |
| Plxnd1      | 2.15E-05 | 0.33630498 | 0.286 | 0.079 | 0.35417285 | 18 |
| Prkcd.3     | 2.42E-05 | 0.25640597 | 0.514 | 0.182 | 0.39835393 | 18 |
| Rab5c       | 2.45E-05 | 0.25064181 | 0.486 | 0.168 | 0.40302314 | 18 |
| B2m.11      | 2.49E-05 | 0.4314623  | 1     | 0.807 | 0.41020687 | 18 |
| Apoe.16     | 2.66E-05 | 0.6147686  | 0.857 | 0.469 | 0.4382709  | 18 |
| Irf8.3      | 2.67E-05 | 0.28732692 | 0.6   | 0.23  | 0.43925586 | 18 |
| Rpl23.4     | 2.68E-05 | -0.4188642 | 1     | 0.975 | 0.44151517 | 18 |
| Rps27a.7    | 2.68E-05 | -0.4954589 | 1     | 0.936 | 0.44153887 | 18 |
| Lamtor1.2   | 2.76E-05 | 0.40452792 | 0.514 | 0.197 | 0.45456895 | 18 |
| Gpr65.1     | 2.92E-05 | 0.48679336 | 0.257 | 0.07  | 0.47979185 | 18 |
| Sdhc        | 3.00E-05 | 0.40415245 | 0.286 | 0.082 | 0.49303861 | 18 |
| Etfa        | 3.03E-05 | 0.31742582 | 0.314 | 0.093 | 0.49784113 | 18 |

|            |           |            |       |       |            |    |
|------------|-----------|------------|-------|-------|------------|----|
| Plgrkt     | 3.12E-05  | 0.27836503 | 0.286 | 0.08  | 0.51293774 | 18 |
| Clec12a.2  | 3.25E-05  | 0.42240708 | 0.343 | 0.11  | 0.53510315 | 18 |
| Ptpn1.3    | 3.27E-05  | 0.28311857 | 0.629 | 0.245 | 0.53767015 | 18 |
| Cox5a.7    | 3.27E-05  | 0.47695423 | 0.771 | 0.378 | 0.53814344 | 18 |
| Eprs.1     | 3.40E-05  | 0.51622969 | 0.371 | 0.128 | 0.55988459 | 18 |
| Rhog.5     | 3.51E-05  | 0.34283678 | 0.686 | 0.29  | 0.57702014 | 18 |
| Calm2.11   | 3.75E-05  | 0.41434996 | 0.8   | 0.385 | 0.61681286 | 18 |
| Ifnar1     | 3.75E-05  | 0.30205539 | 0.343 | 0.107 | 0.61740735 | 18 |
| Laptm4a.8  | 3.77E-05  | 0.43747398 | 0.629 | 0.271 | 0.6199382  | 18 |
| Rpl11.7    | 3.82E-05  | -0.5147429 | 0.971 | 0.926 | 0.62755294 | 18 |
| Yif1b      | 4.03E-05  | 0.37392979 | 0.286 | 0.082 | 0.66216248 | 18 |
| Rps18.9    | 4.15E-05  | -0.6571784 | 0.914 | 0.87  | 0.68232439 | 18 |
| Psma6      | 4.25E-05  | 0.30329064 | 0.4   | 0.134 | 0.69870443 | 18 |
| Rasgef1b.2 | 4.55E-05  | 0.42340928 | 0.371 | 0.126 | 0.74824786 | 18 |
| H2-Eb1.3   | 6.88E-145 | -1.8293326 | 0.311 | 0.746 | 1.13E-140  | 4  |
| Grb2.1     | 4.63E-05  | 0.41858763 | 0.486 | 0.187 | 0.76236373 | 18 |
| Grina      | 4.84E-05  | 0.33753428 | 0.371 | 0.124 | 0.79640708 | 18 |
| Sdhb       | 4.85E-05  | 0.33556403 | 0.486 | 0.183 | 0.79716235 | 18 |
| Atp6v0d1.1 | 5.26E-05  | 0.38311803 | 0.429 | 0.151 | 0.86597161 | 18 |
| Atp5c1.5   | 5.58E-05  | 0.44602884 | 0.743 | 0.341 | 0.91734349 | 18 |
| Nenf       | 5.59E-05  | 0.29103821 | 0.429 | 0.149 | 0.92013602 | 18 |
| Spcs1.1    | 5.69E-05  | 0.39566991 | 0.571 | 0.231 | 0.93551301 | 18 |
| Rpl39.10   | 5.78E-05  | -0.5752668 | 0.943 | 0.889 | 0.94995127 | 18 |
| Sh3glb1.4  | 6.16E-05  | 0.37604255 | 0.743 | 0.35  | 1          | 18 |
| Atp6v1e1.1 | 6.18E-05  | 0.35390001 | 0.371 | 0.124 | 1          | 18 |
| Ndufc2.2   | 6.46E-05  | 0.26102176 | 0.571 | 0.223 | 1          | 18 |
| Nsfl1c     | 6.95E-05  | 0.28424626 | 0.257 | 0.072 | 1          | 18 |
| Atp6v1a    | 7.12E-05  | 0.30164837 | 0.343 | 0.109 | 1          | 18 |
| Mink1      | 7.22E-05  | 0.40503294 | 0.286 | 0.087 | 1          | 18 |
| Rpl27a.8   | 7.27E-05  | -0.5858051 | 0.914 | 0.889 | 1          | 18 |
| Lsp1.14    | 7.86E-05  | -1.5164022 | 0.086 | 0.398 | 1          | 18 |
| Magt1      | 7.96E-05  | 0.32247851 | 0.286 | 0.087 | 1          | 18 |
| Rpl35.7    | 8.18E-05  | -0.4962518 | 1     | 0.924 | 1          | 18 |
| Ndufs3     | 8.45E-05  | 0.29688974 | 0.371 | 0.127 | 1          | 18 |
| Rnf19b.1   | 8.57E-05  | 0.31322601 | 0.314 | 0.099 | 1          | 18 |
| Man2b1.13  | 8.72E-05  | 0.43118244 | 0.657 | 0.297 | 1          | 18 |
| Rps21.6    | 8.73E-05  | -0.5304082 | 0.971 | 0.882 | 1          | 18 |
| Map7d1     | 8.90E-05  | 0.27541731 | 0.343 | 0.112 | 1          | 18 |
| Ergic3     | 9.44E-05  | 0.25650489 | 0.371 | 0.124 | 1          | 18 |
| Tiparp     | 9.55E-05  | 0.47946814 | 0.4   | 0.15  | 1          | 18 |
| Ilk.1      | 9.67E-05  | 0.34547322 | 0.4   | 0.143 | 1          | 18 |
| Sfn2.3     | 9.87E-05  | 0.28508534 | 0.543 | 0.217 | 1          | 18 |
| Rpl27.7    | 9.98E-05  | -0.6299619 | 0.8   | 0.83  | 1          | 18 |

|            |            |            |       |       |           |   |    |
|------------|------------|------------|-------|-------|-----------|---|----|
| Rnh1.2     | 0.00010112 | 0.33638149 | 0.429 | 0.159 |           | 1 | 18 |
| Rnf130.2   | 0.00010424 | 0.25451849 | 0.457 | 0.168 |           | 1 | 18 |
| Eef1a1.12  | 0.00010539 | -0.4171567 | 1     | 0.98  |           | 1 | 18 |
| Atg5       | 0.00010631 | 0.28420747 | 0.257 | 0.074 |           | 1 | 18 |
| Coro1a.9   | 0.00011312 | -1.0572965 | 0.543 | 0.637 |           | 1 | 18 |
| Cyfip1.2   | 0.00011512 | 0.37601306 | 0.457 | 0.176 |           | 1 | 18 |
| Ifi27      | 0.00011926 | 0.27172202 | 0.343 | 0.113 |           | 1 | 18 |
| Fosl2.5    | 0.00012087 | 0.30329862 | 0.543 | 0.213 |           | 1 | 18 |
| Rtf2       | 0.00012661 | 0.32829242 | 0.314 | 0.102 |           | 1 | 18 |
| Mtch1      | 0.00012674 | 0.32300002 | 0.257 | 0.075 |           | 1 | 18 |
| Pigp       | 0.00012763 | 0.34263059 | 0.314 | 0.102 |           | 1 | 18 |
| Fyb.12     | 0.00012771 | 0.45341308 | 0.543 | 0.249 |           | 1 | 18 |
| Colgalt1.1 | 0.00012929 | 0.31775313 | 0.371 | 0.129 |           | 1 | 18 |
| Sec61g.4   | 0.0001451  | 0.33313871 | 0.743 | 0.344 |           | 1 | 18 |
| Nfkbie.2   | 0.00014922 | 0.47337779 | 0.314 | 0.107 |           | 1 | 18 |
| Ndufs2     | 0.00015333 | 0.29349754 | 0.4   | 0.144 |           | 1 | 18 |
| Plek.9     | 0.00016316 | 0.46981104 | 0.657 | 0.345 |           | 1 | 18 |
| Ucp2.8     | 0.00016624 | 0.45814095 | 0.914 | 0.596 |           | 1 | 18 |
| Dnajc15.1  | 0.0001668  | 0.2504605  | 0.4   | 0.144 |           | 1 | 18 |
| Prdx2.2    | 0.00016757 | 0.28025664 | 0.543 | 0.223 |           | 1 | 18 |
| Il2rg.11   | 0.00016981 | 0.35066527 | 0.629 | 0.283 |           | 1 | 18 |
| Lilr4b.1   | 0.00017601 | 0.30685904 | 0.314 | 0.104 |           | 1 | 18 |
| Fkbp15     | 0.00017934 | 0.34058755 | 0.257 | 0.078 |           | 1 | 18 |
| BC028528.1 | 0.00019011 | 0.41422596 | 0.257 | 0.079 |           | 1 | 18 |
| Comt.1     | 0.00019387 | 0.26855511 | 0.371 | 0.131 |           | 1 | 18 |
| Rps29.5    | 0.00020447 | -0.5090105 | 0.914 | 0.894 |           | 1 | 18 |
| Zeb2.15    | 0.0002122  | 0.29782145 | 0.657 | 0.294 |           | 1 | 18 |
| Pacsin2    | 0.00021881 | 0.26059784 | 0.286 | 0.091 |           | 1 | 18 |
| H2-Ab1.3   | 1.49E-151  | -1.9047206 | 0.29  | 0.749 | 2.44E-147 |   | 4  |
| Mvb12a.1   | 0.00022691 | 0.27138264 | 0.314 | 0.105 |           | 1 | 18 |
| Dnase2a    | 0.00024764 | 0.30355367 | 0.286 | 0.093 |           | 1 | 18 |
| Bcl2a1d.6  | 0.00024878 | 0.39777941 | 0.4   | 0.158 |           | 1 | 18 |
| Rnf213     | 0.00026179 | 0.31436698 | 0.314 | 0.107 |           | 1 | 18 |
| Ier2.14    | 0.00026323 | -1.2274024 | 0.371 | 0.557 |           | 1 | 18 |
| Rpl38.3    | 0.00027747 | -0.6274852 | 0.857 | 0.794 |           | 1 | 18 |
| Rplp2.6    | 0.00029713 | -0.4502505 | 1     | 0.919 |           | 1 | 18 |
| Rpl6.8     | 0.000329   | -0.5058895 | 0.914 | 0.897 |           | 1 | 18 |
| Cd84       | 0.00033212 | 0.31221663 | 0.314 | 0.11  |           | 1 | 18 |
| Rps6.9     | 0.00033921 | -0.6682908 | 0.829 | 0.771 |           | 1 | 18 |
| Mrps34     | 0.00034025 | 0.27928409 | 0.257 | 0.081 |           | 1 | 18 |
| Igbp1      | 0.00034296 | 0.26021152 | 0.257 | 0.08  |           | 1 | 18 |
| Rps13.8    | 0.00035836 | -0.5167439 | 0.914 | 0.831 |           | 1 | 18 |
| AI413582   | 0.00035912 | 0.36786228 | 0.371 | 0.142 |           | 1 | 18 |

|            |            |            |       |       |          |    |
|------------|------------|------------|-------|-------|----------|----|
| Ets2.1     | 0.00036214 | 0.46176539 | 0.371 | 0.147 | 1        | 18 |
| Rps20.9    | 0.00036826 | -0.4374099 | 1     | 0.972 | 1        | 18 |
| Eno1.9     | 0.00036898 | 0.28086435 | 0.857 | 0.41  | 1        | 18 |
| Slc35b2    | 0.00037037 | 0.35291508 | 0.257 | 0.083 | 1        | 18 |
| Edf1.3     | 0.00038258 | 0.33545003 | 0.743 | 0.347 | 1        | 18 |
| Gm21188.1  | 0.00039113 | 0.29542268 | 0.257 | 0.082 | 1        | 18 |
| Clta.12    | 0.00039474 | 0.33803245 | 0.886 | 0.547 | 1        | 18 |
| Rps2.8     | 0.00040483 | -0.439727  | 1     | 0.943 | 1        | 18 |
| Rps28.5    | 0.00041063 | -0.597359  | 0.8   | 0.798 | 1        | 18 |
| Rpl23a.4   | 0.00042924 | -0.8128866 | 0.543 | 0.637 | 1        | 18 |
| Prdx5.11   | 0.000435   | 0.28399926 | 0.686 | 0.334 | 1        | 18 |
| Rack1.6    | 0.00043781 | -0.6315699 | 0.743 | 0.769 | 1        | 18 |
| Rplp1.5    | 0.00044534 | -0.3799582 | 1     | 0.973 | 1        | 18 |
| H2-Ab1.14  | 2.60E-09   | -2.359569  | 0.138 | 0.711 | 4.27E-05 | 19 |
| Napsa.15   | 0.00046878 | -1.299525  | 0     | 0.265 | 1        | 18 |
| Sulf2.1    | 0.00047721 | 0.42329224 | 0.286 | 0.099 | 1        | 18 |
| Runx3      | 0.00048301 | 0.40934104 | 0.286 | 0.097 | 1        | 18 |
| Mgat2      | 0.00049403 | 0.26072506 | 0.257 | 0.083 | 1        | 18 |
| Gabarap.7  | 0.00050034 | 0.31270665 | 0.914 | 0.564 | 1        | 18 |
| Got1.2     | 0.00051749 | 0.49894545 | 0.286 | 0.102 | 1        | 18 |
| Icam1.5    | 0.00052647 | 0.29280683 | 0.429 | 0.175 | 1        | 18 |
| Rpl14.12   | 0.00054966 | -0.6026779 | 0.914 | 0.786 | 1        | 18 |
| Naca.7     | 0.00055033 | -0.7875725 | 0.686 | 0.658 | 1        | 18 |
| Reep5.4    | 0.00056433 | 0.33529539 | 0.686 | 0.353 | 1        | 18 |
| Rpl9.4     | 0.00056991 | -0.8383655 | 0.6   | 0.629 | 1        | 18 |
| Lman2.1    | 0.00057062 | 0.26794393 | 0.4   | 0.158 | 1        | 18 |
| Sdf2l1.5   | 0.00057814 | 0.32618644 | 0.4   | 0.163 | 1        | 18 |
| Cuedc2     | 0.00058257 | 0.25328939 | 0.286 | 0.098 | 1        | 18 |
| Aamp       | 0.0005949  | 0.25701511 | 0.343 | 0.127 | 1        | 18 |
| Prcp.3     | 0.00062284 | 0.25523494 | 0.457 | 0.187 | 1        | 18 |
| Per1.1     | 0.00064841 | 0.25980757 | 0.314 | 0.114 | 1        | 18 |
| Vcp.3      | 0.00066602 | 0.28153253 | 0.571 | 0.259 | 1        | 18 |
| Atp6v1d    | 0.00066799 | 0.3200579  | 0.314 | 0.115 | 1        | 18 |
| Tubb2a.2   | 0.00069377 | 0.27296834 | 0.286 | 0.1   | 1        | 18 |
| Uqcrb.2    | 0.00072002 | 0.35343926 | 0.629 | 0.279 | 1        | 18 |
| Mapkapk2   | 0.00072166 | 0.33269937 | 0.371 | 0.145 | 1        | 18 |
| Txn1.8     | 0.00076165 | 0.3301942  | 0.543 | 0.25  | 1        | 18 |
| Tnfrsf1b.3 | 0.00077143 | 0.25926121 | 0.314 | 0.114 | 1        | 18 |
| Ehd4.15    | 0.00077495 | 0.26758665 | 0.571 | 0.266 | 1        | 18 |
| Gpx1.16    | 0.00080827 | 0.38673968 | 0.971 | 0.711 | 1        | 18 |
| Ctsh.13    | 0.00081182 | 0.32435795 | 0.743 | 0.384 | 1        | 18 |
| Gimp       | 0.00081731 | 0.27910153 | 0.343 | 0.13  | 1        | 18 |
| Mrpl14.1   | 0.00090091 | 0.28549172 | 0.343 | 0.133 | 1        | 18 |



|             |            |            |       |       |   |    |
|-------------|------------|------------|-------|-------|---|----|
| Dctn3       | 0.00091632 | 0.31117295 | 0.4   | 0.165 | 1 | 18 |
| Rpl19.9     | 0.00094612 | -0.4099919 | 1     | 0.954 | 1 | 18 |
| Cd83.13     | 0.00099209 | 0.3783594  | 0.829 | 0.469 | 1 | 18 |
| Ms4a6c.5    | 0.00105208 | 0.26966169 | 0.514 | 0.227 | 1 | 18 |
| Stard3nl.1  | 0.00109349 | 0.2772169  | 0.371 | 0.149 | 1 | 18 |
| Ccdc88a.2   | 0.00109455 | 0.30904542 | 0.286 | 0.104 | 1 | 18 |
| Atp2b1.9    | 0.00110504 | 0.34945704 | 0.686 | 0.345 | 1 | 18 |
| Arpc1b.11   | 0.00119675 | 0.33032765 | 0.914 | 0.622 | 1 | 18 |
| Rpl5.7      | 0.00126485 | -0.6546214 | 0.829 | 0.716 | 1 | 18 |
| Ptprcap.16  | 0.00132537 | -1.3145636 | 0.029 | 0.266 | 1 | 18 |
| S100a10.15  | 0.00133065 | -1.1168886 | 0.257 | 0.461 | 1 | 18 |
| Dnajb6      | 0.0013741  | 0.28234473 | 0.343 | 0.137 | 1 | 18 |
| Lipa.1      | 0.00140124 | 0.31175603 | 0.314 | 0.123 | 1 | 18 |
| Ccl5.3      | 0.00140204 | -0.7589704 | 0.4   | 0.157 | 1 | 18 |
| Rpl12.12    | 0.00145145 | -0.6698103 | 0.8   | 0.761 | 1 | 18 |
| Mlf2.1      | 0.00151944 | 0.3933598  | 0.371 | 0.165 | 1 | 18 |
| Card19.1    | 0.00155285 | 0.26891929 | 0.4   | 0.171 | 1 | 18 |
| Ifi27l2a.15 | 0.00165075 | -1.4109636 | 0.171 | 0.404 | 1 | 18 |
| Fgl2.4      | 0.00169958 | 0.32776742 | 0.314 | 0.127 | 1 | 18 |
| Minos1.2    | 0.00181716 | 0.32594982 | 0.429 | 0.198 | 1 | 18 |
| Rpl26.6     | 0.00193698 | -0.397573  | 1     | 0.898 | 1 | 18 |
| Cd79a.16    | 0.0019447  | -2.134792  | 0.029 | 0.252 | 1 | 18 |
| Il10rb      | 0.00197846 | 0.2625274  | 0.314 | 0.123 | 1 | 18 |
| Acaa1a      | 0.00203575 | 0.26367166 | 0.286 | 0.11  | 1 | 18 |
| Rplp0.8     | 0.00205597 | -0.4751942 | 0.971 | 0.903 | 1 | 18 |
| Mvp.1       | 0.00253888 | 0.26469063 | 0.257 | 0.096 | 1 | 18 |
| Spi1.13     | 0.00253999 | 0.28778738 | 0.6   | 0.304 | 1 | 18 |
| Selenos.1   | 0.00254291 | 0.28577059 | 0.343 | 0.145 | 1 | 18 |
| Lcp2.1      | 0.00263861 | 0.28787293 | 0.314 | 0.129 | 1 | 18 |
| Gpr132.7    | 0.0031849  | 0.25163964 | 0.486 | 0.223 | 1 | 18 |
| Rpl22.7     | 0.00351671 | -0.4141918 | 0.914 | 0.827 | 1 | 18 |
| Tgfb1.6     | 0.00366197 | 0.26912772 | 0.486 | 0.235 | 1 | 18 |
| Atp5g3.3    | 0.00393529 | 0.25519438 | 0.829 | 0.456 | 1 | 18 |
| Map2k2      | 0.00394482 | 0.25453519 | 0.429 | 0.201 | 1 | 18 |
| Aldoa.8     | 0.00411865 | 0.26293525 | 0.686 | 0.365 | 1 | 18 |
| Gusb.1      | 0.00458666 | 0.27959446 | 0.286 | 0.118 | 1 | 18 |
| Rpl13a.12   | 0.00582234 | -0.4511738 | 0.857 | 0.813 | 1 | 18 |
| Psmb5.2     | 0.00582809 | 0.2985575  | 0.429 | 0.205 | 1 | 18 |
| Hsp90ab1.4  | 0.00630168 | -0.4199801 | 0.943 | 0.805 | 1 | 18 |
| Cd9.3       | 0.00642412 | 0.55541418 | 0.286 | 0.128 | 1 | 18 |
| Pf4.18      | 0.00660393 | -0.3740633 | 0.657 | 0.305 | 1 | 18 |
| Rtraf.4     | 0.0074712  | 0.28151369 | 0.514 | 0.266 | 1 | 18 |
| Rps26.12    | 0.00872357 | -0.3284125 | 0.971 | 0.934 | 1 | 18 |

|            |            |            |       |       |           |    |
|------------|------------|------------|-------|-------|-----------|----|
| Sqstm1.7   | 0.00887756 | 0.32154838 | 0.629 | 0.381 | 1         | 18 |
| Rheb.1     | 0.00887798 | 0.27120258 | 0.343 | 0.165 | 1         | 18 |
| Mrpl36     | 0.00902828 | 0.28338209 | 0.257 | 0.109 | 1         | 18 |
| Arhgap45.8 | 0.00951735 | -0.9574468 | 0.143 | 0.316 | 1         | 18 |
| Btg1.11    | 0.00992587 | -0.8300235 | 0.514 | 0.573 | 1         | 18 |
| Saa3       | 0          | 4.51553501 | 1     | 0.001 | 0         | 19 |
| Prg4       | 0          | 3.77079927 | 0.966 | 0.001 | 0         | 19 |
| Alox15     | 0          | 3.44143562 | 0.897 | 0     | 0         | 19 |
| Serpinb2   | 0          | 2.38979948 | 0.724 | 0.006 | 0         | 19 |
| Padi4      | 0          | 2.15709807 | 0.724 | 0.007 | 0         | 19 |
| Cd5l       | 0          | 2.13992058 | 0.655 | 0.001 | 0         | 19 |
| Lrg1       | 0          | 1.88192852 | 0.586 | 0.001 | 0         | 19 |
| Selp       | 0          | 1.76621875 | 0.69  | 0.002 | 0         | 19 |
| Prtn3      | 0          | 1.74085533 | 0.586 | 0.003 | 0         | 19 |
| F5         | 0          | 1.6983708  | 0.552 | 0.004 | 0         | 19 |
| Tgfb2      | 0          | 1.58288303 | 0.345 | 0     | 0         | 19 |
| Ltbp1      | 0          | 1.48794592 | 0.517 | 0     | 0         | 19 |
| Ptgis      | 0          | 1.39308348 | 0.448 | 0.002 | 0         | 19 |
| Wnt2       | 0          | 1.07833614 | 0.276 | 0     | 0         | 19 |
| Fabp7      | 0          | 1.05362222 | 0.345 | 0     | 0         | 19 |
| Cald1      | 3.45E-210  | 1.09878971 | 0.345 | 0.002 | 5.68E-206 | 19 |
| Itga6      | 4.31E-177  | 1.96616521 | 0.759 | 0.018 | 7.09E-173 | 19 |
| Olr1       | 4.15E-149  | 0.96417879 | 0.31  | 0.003 | 6.82E-145 | 19 |
| Calml4     | 4.75E-143  | 1.15840834 | 0.345 | 0.004 | 7.81E-139 | 19 |
| F10        | 1.95E-135  | 1.50131105 | 0.517 | 0.01  | 3.21E-131 | 19 |
| Gm16104    | 6.04E-125  | 0.89360996 | 0.31  | 0.004 | 9.94E-121 | 19 |
| Cgnl1      | 5.61E-111  | 1.42204056 | 0.448 | 0.01  | 9.23E-107 | 19 |
| Icam2      | 7.31E-104  | 1.84214158 | 0.655 | 0.023 | 1.20E-99  | 19 |
| Thbs1.1    | 6.79E-94   | 2.44441042 | 0.793 | 0.039 | 1.12E-89  | 19 |
| Slpi.1     | 1.20E-84   | 3.53801517 | 0.517 | 0.018 | 1.98E-80  | 19 |
| Fn1.2      | 1.22E-83   | 3.63337053 | 1     | 0.08  | 2.00E-79  | 19 |
| Emilin2.1  | 1.10E-75   | 2.17632493 | 0.862 | 0.06  | 1.81E-71  | 19 |
| Fabp4      | 3.41E-73   | 1.96788364 | 0.586 | 0.027 | 5.60E-69  | 19 |
| Il6        | 1.28E-67   | 1.67357457 | 0.483 | 0.019 | 2.10E-63  | 19 |
| Ecm1       | 1.58E-67   | 2.3231075  | 0.897 | 0.072 | 2.61E-63  | 19 |
| Mcomp1     | 1.16E-53   | 1.42637268 | 0.586 | 0.037 | 1.90E-49  | 19 |
| Engase     | 2.47E-50   | 0.95666584 | 0.345 | 0.013 | 4.07E-46  | 19 |
| Timd4      | 4.42E-47   | 1.52990345 | 0.552 | 0.037 | 7.26E-43  | 19 |
| C4b.2      | 6.73E-46   | 2.3979509  | 0.931 | 0.123 | 1.11E-41  | 19 |
| Plxdc2     | 9.49E-46   | 1.26248299 | 0.448 | 0.025 | 1.56E-41  | 19 |
| Pygl       | 2.79E-43   | 1.09373569 | 0.345 | 0.016 | 4.59E-39  | 19 |
| Ltc4s.2    | 4.84E-36   | 1.81682989 | 0.931 | 0.145 | 7.97E-32  | 19 |
| Flnb       | 3.24E-35   | 1.5241271  | 0.448 | 0.033 | 5.32E-31  | 19 |

|            |          |            |       |       |          |    |
|------------|----------|------------|-------|-------|----------|----|
| Cxcl13.1   | 2.82E-34 | 1.69987778 | 0.448 | 0.033 | 4.64E-30 | 19 |
| Itgam      | 1.25E-33 | 1.60893007 | 0.724 | 0.09  | 2.05E-29 | 19 |
| Clec4d     | 3.97E-33 | 1.12831885 | 0.31  | 0.017 | 6.53E-29 | 19 |
| Gadd45a    | 9.32E-33 | 1.05707074 | 0.345 | 0.021 | 1.53E-28 | 19 |
| Gda.3      | 3.96E-31 | 1.37593565 | 0.828 | 0.12  | 6.51E-27 | 19 |
| Clec4e     | 1.85E-30 | 0.88873445 | 0.379 | 0.026 | 3.04E-26 | 19 |
| Bst1       | 7.06E-30 | 0.76830834 | 0.276 | 0.015 | 1.16E-25 | 19 |
| Msr1       | 1.22E-29 | 1.10778686 | 0.414 | 0.032 | 2.01E-25 | 19 |
| Ptgs1      | 3.30E-29 | 1.00710522 | 0.586 | 0.061 | 5.43E-25 | 19 |
| Cxcl2.15   | 5.82E-29 | 2.05953331 | 1     | 0.248 | 9.57E-25 | 19 |
| Cxcl1      | 7.39E-29 | 1.81418422 | 0.379 | 0.029 | 1.22E-24 | 19 |
| Ednrb.1    | 5.35E-28 | 1.33168749 | 0.69  | 0.09  | 8.79E-24 | 19 |
| Osm        | 9.00E-27 | 1.04315698 | 0.414 | 0.035 | 1.48E-22 | 19 |
| Atp1a3     | 1.11E-26 | 0.81332238 | 0.31  | 0.02  | 1.83E-22 | 19 |
| Evi5       | 7.84E-26 | 0.96338762 | 0.448 | 0.043 | 1.29E-21 | 19 |
| Ccrl2.2    | 2.11E-23 | 1.47989793 | 0.552 | 0.075 | 3.47E-19 | 19 |
| Fabp5.2    | 4.06E-23 | 1.08148147 | 0.552 | 0.07  | 6.67E-19 | 19 |
| Wfdc17.15  | 8.61E-23 | 1.9474744  | 1     | 0.327 | 1.42E-18 | 19 |
| Nupr1      | 9.06E-23 | 1.26772508 | 0.414 | 0.042 | 1.49E-18 | 19 |
| Hgsnat     | 1.61E-22 | 0.92018403 | 0.448 | 0.048 | 2.64E-18 | 19 |
| Gngt2.3    | 8.85E-22 | 1.09885874 | 0.655 | 0.103 | 1.46E-17 | 19 |
| Timp2.3    | 1.66E-21 | 1.25719537 | 0.897 | 0.2   | 2.73E-17 | 19 |
| Lyz2.18    | 3.18E-21 | 2.07779389 | 1     | 0.553 | 5.23E-17 | 19 |
| Cd9.4      | 6.03E-21 | 1.50916387 | 0.69  | 0.127 | 9.91E-17 | 19 |
| Sdc3.4     | 5.43E-18 | 1.33123736 | 0.759 | 0.168 | 8.93E-14 | 19 |
| St3gal5.1  | 5.84E-18 | 0.98620865 | 0.483 | 0.069 | 9.60E-14 | 19 |
| Hp.1       | 6.52E-18 | 0.63616764 | 0.276 | 0.024 | 1.07E-13 | 19 |
| Man2a1     | 3.71E-17 | 0.78611616 | 0.448 | 0.061 | 6.11E-13 | 19 |
| Ier3.13    | 9.83E-17 | 1.29054209 | 1     | 0.323 | 1.62E-12 | 19 |
| Ank        | 1.18E-16 | 0.93095082 | 0.379 | 0.048 | 1.94E-12 | 19 |
| Cfp.16     | 1.50E-16 | 1.32308917 | 0.931 | 0.309 | 2.47E-12 | 19 |
| Alox5ap.17 | 1.71E-16 | 1.2266079  | 1     | 0.395 | 2.81E-12 | 19 |
| Pilra.1    | 2.30E-16 | 0.93445467 | 0.345 | 0.04  | 3.79E-12 | 19 |
| Cybb.13    | 1.01E-15 | 1.30298364 | 0.897 | 0.327 | 1.66E-11 | 19 |
| Polr3gl    | 1.41E-15 | 0.95551301 | 0.379 | 0.05  | 2.32E-11 | 19 |
| Lyz1.1     | 3.61E-15 | 1.03073089 | 0.345 | 0.043 | 5.94E-11 | 19 |
| Fgfr1.4    | 2.05E-14 | 1.0157118  | 0.552 | 0.107 | 3.37E-10 | 19 |
| Tcn2.1     | 2.56E-14 | 1.12287623 | 0.517 | 0.098 | 4.21E-10 | 19 |
| Cebpb.17   | 2.68E-14 | 1.17669753 | 0.931 | 0.327 | 4.41E-10 | 19 |
| Khk.1      | 4.39E-14 | 0.80795585 | 0.345 | 0.046 | 7.21E-10 | 19 |
| Cd14.18    | 7.17E-14 | 1.18720726 | 0.828 | 0.258 | 1.18E-09 | 19 |
| Prdx5.12   | 7.54E-14 | 1.0718543  | 0.897 | 0.333 | 1.24E-09 | 19 |
| Apoe.17    | 8.75E-14 | 1.39715697 | 0.966 | 0.469 | 1.44E-09 | 19 |

|           |          |            |       |       |            |    |
|-----------|----------|------------|-------|-------|------------|----|
| Klf13.1   | 1.44E-13 | 1.04305448 | 0.655 | 0.156 | 2.36E-09   | 19 |
| Pros1     | 2.11E-13 | 0.95998481 | 0.414 | 0.067 | 3.46E-09   | 19 |
| Plaur.1   | 5.08E-13 | 0.85969705 | 0.517 | 0.099 | 8.36E-09   | 19 |
| Ipmk      | 5.10E-13 | 0.55756319 | 0.31  | 0.039 | 8.39E-09   | 19 |
| Gpx1.17   | 6.05E-13 | 1.0746213  | 1     | 0.711 | 9.96E-09   | 19 |
| Itgb2.12  | 1.53E-12 | 1.28058127 | 0.759 | 0.266 | 2.51E-08   | 19 |
| Comt.2    | 1.65E-12 | 1.14806774 | 0.552 | 0.13  | 2.71E-08   | 19 |
| Klf9      | 1.71E-12 | 0.59060081 | 0.276 | 0.033 | 2.82E-08   | 19 |
| Fcna.2    | 2.54E-12 | 1.03657678 | 0.69  | 0.17  | 4.18E-08   | 19 |
| App.12    | 3.76E-12 | 0.91761993 | 0.862 | 0.272 | 6.18E-08   | 19 |
| C1qc.18   | 6.20E-12 | 0.88870788 | 1     | 0.331 | 1.02E-07   | 19 |
| Mgst1.1   | 1.31E-11 | 0.86645206 | 0.448 | 0.086 | 2.16E-07   | 19 |
| Smpdl3a.4 | 2.40E-11 | 0.878774   | 0.621 | 0.159 | 3.94E-07   | 19 |
| C1qb.18   | 2.47E-11 | 0.89447147 | 1     | 0.35  | 4.07E-07   | 19 |
| Cd74.14   | 4.17E-11 | -2.6106759 | 0.345 | 0.829 | 6.86E-07   | 19 |
| Ifitm3.15 | 4.63E-11 | 0.9104265  | 0.966 | 0.489 | 7.61E-07   | 19 |
| Pycard.5  | 1.32E-10 | 0.99764888 | 0.655 | 0.203 | 2.17E-06   | 19 |
| Adgre1.2  | 1.69E-10 | 1.0600501  | 0.586 | 0.159 | 2.77E-06   | 19 |
| Tmsb10.14 | 1.93E-10 | -2.4286115 | 0.31  | 0.787 | 3.17E-06   | 19 |
| Gapdh.8   | 4.53E-10 | 0.77790199 | 0.966 | 0.713 | 7.45E-06   | 19 |
| H2-Aa.14  | 1.71E-09 | -2.5085673 | 0.276 | 0.745 | 2.82E-05   | 19 |
| Cd84.1    | 1.06E-09 | 0.68779004 | 0.483 | 0.109 | 1.74E-05   | 19 |
| Tyrobp.16 | 1.06E-09 | 0.8322522  | 1     | 0.606 | 1.75E-05   | 19 |
| H2-Eb1.13 | 9.69E-10 | -2.7174208 | 0.138 | 0.71  | 1.59E-05   | 19 |
| Plk2.1    | 2.30E-09 | 1.13884931 | 0.31  | 0.056 | 3.78E-05   | 19 |
| Tnfsf13.2 | 2.51E-09 | 0.70817521 | 0.345 | 0.065 | 4.14E-05   | 19 |
| H2-Eb1.7  | 1.34E-88 | -2.8006493 | 0.123 | 0.731 | 2.21E-84   | 10 |
| Add3.2    | 2.70E-09 | 0.70674167 | 0.586 | 0.16  | 4.44E-05   | 19 |
| Pltp.18   | 3.38E-09 | 0.72182996 | 0.897 | 0.335 | 5.55E-05   | 19 |
| Lrp1.3    | 4.28E-09 | 0.84357992 | 0.517 | 0.131 | 7.04E-05   | 19 |
| Nfkbia.14 | 4.88E-09 | 1.01310709 | 0.931 | 0.519 | 8.03E-05   | 19 |
| Fcgr3.5   | 6.54E-09 | 0.8073389  | 0.69  | 0.225 | 0.00010757 | 19 |
| Plek.10   | 6.80E-09 | 0.84103155 | 0.828 | 0.345 | 0.00011178 | 19 |
| Ctsl.3    | 7.45E-09 | 0.7598045  | 0.517 | 0.136 | 0.00012262 | 19 |
| Dusp1.11  | 8.82E-09 | 0.83319803 | 0.966 | 0.604 | 0.00014508 | 19 |
| Hacd4.2   | 1.30E-08 | 0.72282318 | 0.483 | 0.122 | 0.00021415 | 19 |
| Ifitm2.16 | 1.64E-08 | 0.77779555 | 0.897 | 0.389 | 0.00026979 | 19 |
| Coro1a.10 | 1.69E-08 | -1.9906865 | 0.103 | 0.639 | 0.00027861 | 19 |
| C1qa.18   | 1.98E-08 | 0.68865856 | 0.897 | 0.328 | 0.0003254  | 19 |
| Pmp22.3   | 2.03E-08 | 0.71419579 | 0.414 | 0.095 | 0.00033371 | 19 |
| Txn1.9    | 2.23E-08 | 0.96448773 | 0.655 | 0.249 | 0.00036611 | 19 |
| Lpl.2     | 2.29E-08 | 0.57687525 | 0.414 | 0.093 | 0.00037716 | 19 |
| Mafb.17   | 3.19E-08 | 0.6218785  | 0.759 | 0.262 | 0.00052427 | 19 |

|           |          |            |       |       |            |    |
|-----------|----------|------------|-------|-------|------------|----|
| Hexa.14   | 3.24E-08 | 0.65389589 | 0.793 | 0.29  | 0.00053265 | 19 |
| Cd52.13   | 3.34E-08 | -1.6219392 | 0.276 | 0.736 | 0.00054885 | 19 |
| Ier2.15   | 3.84E-08 | 0.86080674 | 0.931 | 0.554 | 0.00063214 | 19 |
| Rbpms     | 4.27E-08 | 0.63008748 | 0.276 | 0.05  | 0.00070295 | 19 |
| Fam46a.2  | 4.89E-08 | 0.70291942 | 0.483 | 0.129 | 0.00080489 | 19 |
| Ccl6.17   | 5.04E-08 | 0.8136708  | 0.931 | 0.411 | 0.00082861 | 19 |
| Rhoc      | 6.53E-08 | 0.64162005 | 0.276 | 0.051 | 0.00107488 | 19 |
| Creg1.4   | 7.91E-08 | 0.78035718 | 0.621 | 0.203 | 0.00130107 | 19 |
| Neat1.15  | 8.02E-08 | 0.72135026 | 0.793 | 0.325 | 0.00131895 | 19 |
| Cfh.2     | 1.06E-07 | 0.60777675 | 0.621 | 0.19  | 0.0017452  | 19 |
| Bmp2      | 1.07E-07 | 0.9792888  | 0.276 | 0.054 | 0.00176699 | 19 |
| Tmx1      | 1.18E-07 | 0.53640126 | 0.31  | 0.063 | 0.00193447 | 19 |
| C5ar1.2   | 1.52E-07 | 0.50362874 | 0.621 | 0.185 | 0.00250479 | 19 |
| Cyba.9    | 1.69E-07 | 0.57698928 | 0.966 | 0.717 | 0.00278445 | 19 |
| Nlrp3.1   | 1.84E-07 | 0.74536285 | 0.379 | 0.092 | 0.00303108 | 19 |
| Ctsd.16   | 1.85E-07 | 0.89668986 | 0.724 | 0.289 | 0.00304717 | 19 |
| Lamp2.2   | 4.45E-07 | 0.6162342  | 0.552 | 0.171 | 0.00731929 | 19 |
| Camk1.2   | 4.47E-07 | 0.63668536 | 0.379 | 0.095 | 0.0073468  | 19 |
| Dapk1.1   | 5.09E-07 | 0.58595165 | 0.31  | 0.069 | 0.00837407 | 19 |
| Dhrs3.2   | 6.22E-07 | 0.60124646 | 0.414 | 0.11  | 0.01022756 | 19 |
| Sgms1     | 6.30E-07 | 0.72081454 | 0.31  | 0.07  | 0.01036776 | 19 |
| Pgd       | 7.87E-07 | 0.70947891 | 0.345 | 0.085 | 0.01294984 | 19 |
| Hipk2     | 9.21E-07 | 0.57574472 | 0.276 | 0.057 | 0.01515439 | 19 |
| Mfsd5     | 1.15E-06 | 0.57715644 | 0.345 | 0.085 | 0.01883909 | 19 |
| Pf4.19    | 1.19E-06 | 0.99748408 | 0.724 | 0.305 | 0.01962804 | 19 |
| Ftl1.15   | 1.20E-06 | 0.54875008 | 1     | 0.89  | 0.01970383 | 19 |
| Tmsb4x.13 | 1.40E-06 | -0.6447997 | 0.966 | 0.993 | 0.02308984 | 19 |
| Malat1.10 | 1.49E-06 | -0.894475  | 0.862 | 0.937 | 0.02444518 | 19 |
| Phlda1.2  | 1.80E-06 | 1.04582531 | 0.483 | 0.157 | 0.02964517 | 19 |
| Alox5.1   | 1.82E-06 | 0.55447495 | 0.276 | 0.06  | 0.02986989 | 19 |
| Derl1.1   | 2.06E-06 | 0.80268776 | 0.414 | 0.121 | 0.03390924 | 19 |
| Gng5.9    | 2.19E-06 | 0.67025894 | 1     | 0.595 | 0.03605286 | 19 |
| Srgn.9    | 2.21E-06 | 0.60234261 | 0.931 | 0.672 | 0.03636596 | 19 |
| Selplg.10 | 2.21E-06 | 0.66560571 | 0.724 | 0.304 | 0.03640093 | 19 |
| Tagln2.12 | 2.48E-06 | 0.64457536 | 0.862 | 0.488 | 0.0407805  | 19 |
| Idh1      | 4.17E-06 | 0.60337687 | 0.31  | 0.077 | 0.06861146 | 19 |
| Egr1.14   | 4.68E-06 | 0.62124597 | 0.862 | 0.456 | 0.07692453 | 19 |
| Jun.15    | 5.12E-06 | 0.27837358 | 0.966 | 0.46  | 0.08427948 | 19 |
| Tnfaip8.5 | 5.47E-06 | 0.87982094 | 0.517 | 0.183 | 0.08999082 | 19 |
| Dhrs7     | 6.20E-06 | 0.53328571 | 0.276 | 0.064 | 0.10206166 | 19 |
| Lamtor4.2 | 8.99E-06 | 0.69451193 | 0.552 | 0.21  | 0.14787116 | 19 |
| Nucb1.1   | 9.26E-06 | 0.69137082 | 0.414 | 0.134 | 0.15224909 | 19 |
| Nin       | 9.60E-06 | 0.36257892 | 0.345 | 0.091 | 0.15789601 | 19 |

|            |            |            |       |       |            |    |
|------------|------------|------------|-------|-------|------------|----|
| Glul.3     | 1.09E-05   | 0.50675559 | 0.586 | 0.221 | 0.179507   | 19 |
| Ccl24.2    | 1.12E-05   | 0.60571473 | 0.448 | 0.148 | 0.18483549 | 19 |
| Man2b1.14  | 1.18E-05   | 0.81562267 | 0.621 | 0.298 | 0.19413307 | 19 |
| Tmco1      | 1.24E-05   | 0.66185142 | 0.345 | 0.098 | 0.20384571 | 19 |
| Actg1.11   | 1.37E-05   | -0.7898448 | 0.897 | 0.901 | 0.22530494 | 19 |
| Anxa3.2    | 1.45E-05   | 0.51688899 | 0.276 | 0.067 | 0.2390426  | 19 |
| Gimp.1     | 1.50E-05   | 0.54691376 | 0.414 | 0.13  | 0.2467879  | 19 |
| Cdkn1a.6   | 1.52E-05   | 0.84345009 | 0.552 | 0.23  | 0.2494658  | 19 |
| Cd86.2     | 1.70E-05   | 0.49337497 | 0.345 | 0.096 | 0.27989696 | 19 |
| Ccdc12.3   | 2.12E-05   | 0.50561178 | 0.586 | 0.226 | 0.34839655 | 19 |
| Ctss.14    | 2.95E-05   | 0.48413548 | 0.897 | 0.5   | 0.48560367 | 19 |
| Sdf2l1.6   | 3.11E-05   | 0.70514437 | 0.448 | 0.163 | 0.51164855 | 19 |
| Lgals3bp.1 | 3.48E-05   | 0.3229549  | 0.379 | 0.112 | 0.57171035 | 19 |
| Itgb1.4    | 3.96E-05   | 0.70248789 | 0.552 | 0.243 | 0.65089561 | 19 |
| Ly6e.12    | 5.14E-05   | -1.0690215 | 0.69  | 0.75  | 0.84512448 | 19 |
| Al467606   | 5.28E-05   | 0.44258208 | 0.276 | 0.073 | 0.86902558 | 19 |
| Cotl1.9    | 6.04E-05   | 0.69645149 | 0.724 | 0.361 | 0.99304353 | 19 |
| Acly       | 6.48E-05   | 0.48662119 | 0.31  | 0.09  | 1          | 19 |
| Ppp3ca     | 6.65E-05   | 0.56141338 | 0.483 | 0.178 | 1          | 19 |
| Aldh2.4    | 6.70E-05   | 0.67426755 | 0.517 | 0.206 | 1          | 19 |
| Pam16      | 7.24E-05   | 0.41959058 | 0.276 | 0.075 | 1          | 19 |
| Lrpap1.1   | 7.41E-05   | 0.45543341 | 0.276 | 0.075 | 1          | 19 |
| Stk17b.10  | 8.36E-05   | -1.4634891 | 0.069 | 0.438 | 1          | 19 |
| Tmed3      | 8.82E-05   | 0.58112813 | 0.379 | 0.131 | 1          | 19 |
| Zfp36.11   | 9.89E-05   | 0.45042574 | 0.966 | 0.61  | 1          | 19 |
| Ccnl1.11   | 0.00010124 | 0.7221237  | 0.655 | 0.305 | 1          | 19 |
| Rps8.7     | 0.00010416 | 0.27163008 | 1     | 0.983 | 1          | 19 |
| Npc2.14    | 0.00010518 | 0.48860509 | 0.862 | 0.511 | 1          | 19 |
| Vkorc1     | 0.00011202 | 0.61071744 | 0.379 | 0.134 | 1          | 19 |
| Ifnar2.2   | 0.00011318 | 0.56507357 | 0.483 | 0.189 | 1          | 19 |
| Aplp2.3    | 0.0001166  | 0.50570076 | 0.552 | 0.234 | 1          | 19 |
| Sel1l.1    | 0.00012105 | 0.58948467 | 0.276 | 0.081 | 1          | 19 |
| Ninj1.9    | 0.00012491 | 0.26348908 | 0.621 | 0.241 | 1          | 19 |
| Cd83.14    | 0.00012757 | -1.3499116 | 0.103 | 0.472 | 1          | 19 |
| Ubash3b    | 0.0001363  | 0.56674097 | 0.276 | 0.081 | 1          | 19 |
| Cflar.1    | 0.00013856 | 0.54369102 | 0.345 | 0.11  | 1          | 19 |
| Park7.4    | 0.00014802 | 0.53254672 | 0.586 | 0.264 | 1          | 19 |
| Reep3.1    | 0.0001512  | 0.56283783 | 0.379 | 0.132 | 1          | 19 |
| Ndufv3.2   | 0.00015759 | 0.44364268 | 0.552 | 0.226 | 1          | 19 |
| Cd93.1     | 0.00016126 | 0.31062462 | 0.31  | 0.091 | 1          | 19 |
| Cd36.2     | 0.00016995 | 0.28009035 | 0.448 | 0.157 | 1          | 19 |
| Itsn1.2    | 0.00017644 | 0.40981872 | 0.31  | 0.092 | 1          | 19 |
| Tiparp.1   | 0.0001831  | 0.67163428 | 0.414 | 0.15  | 1          | 19 |

|             |            |            |       |       |   |    |
|-------------|------------|------------|-------|-------|---|----|
| Nr4a1.11    | 0.00019032 | 0.57519823 | 0.828 | 0.504 | 1 | 19 |
| Bola3.1     | 0.00020463 | 0.38984227 | 0.31  | 0.097 | 1 | 19 |
| Arrb2.1     | 0.00020613 | 0.38280366 | 0.414 | 0.148 | 1 | 19 |
| Dnajb9      | 0.00020773 | 0.48137231 | 0.345 | 0.114 | 1 | 19 |
| Cd302.1     | 0.0002101  | 0.40431482 | 0.31  | 0.096 | 1 | 19 |
| Tbl1x       | 0.00021169 | 0.37872284 | 0.276 | 0.08  | 1 | 19 |
| Tmem14c.3   | 0.00022189 | 0.51029676 | 0.448 | 0.177 | 1 | 19 |
| Ahnak.12    | 0.00022331 | 0.36504321 | 0.931 | 0.545 | 1 | 19 |
| Pfn1.8      | 0.00022732 | -0.6390945 | 0.828 | 0.86  | 1 | 19 |
| 1810009A15R | 0.00023425 | 0.34498377 | 0.276 | 0.081 | 1 | 19 |
| Laptm5.6    | 0.00024414 | 0.48718119 | 0.828 | 0.654 | 1 | 19 |
| Rpl13a.13   | 0.00024593 | -0.7499401 | 0.759 | 0.813 | 1 | 19 |
| Tln1.6      | 0.00024788 | 0.54113432 | 0.759 | 0.426 | 1 | 19 |
| Gnaq        | 0.00027804 | 0.38692434 | 0.276 | 0.082 | 1 | 19 |
| Grn.14      | 0.00029145 | 0.37967841 | 0.724 | 0.375 | 1 | 19 |
| Snx1        | 0.00030453 | 0.37495832 | 0.276 | 0.083 | 1 | 19 |
| Rpl10.5     | 0.00032735 | 0.40354972 | 0.931 | 0.676 | 1 | 19 |
| Bin1        | 0.00035033 | 0.44133323 | 0.379 | 0.133 | 1 | 19 |
| Dusp3       | 0.00035228 | 0.28689346 | 0.31  | 0.097 | 1 | 19 |
| Vsir.2      | 0.0003639  | 0.56065713 | 0.414 | 0.16  | 1 | 19 |
| Ier3ip1     | 0.00036935 | 0.42354814 | 0.414 | 0.157 | 1 | 19 |
| Fxyd5.16    | 0.00037992 | 0.61280847 | 0.793 | 0.464 | 1 | 19 |
| S100a1.1    | 0.0003805  | 0.42295479 | 0.31  | 0.099 | 1 | 19 |
| Ifngr1.11   | 0.00038338 | -1.4013031 | 0.069 | 0.384 | 1 | 19 |
| Gorasp2.1   | 0.0004025  | 0.36204488 | 0.276 | 0.085 | 1 | 19 |
| Txnrd1      | 0.00042581 | 0.47260562 | 0.276 | 0.084 | 1 | 19 |
| S100a6.13   | 0.00042846 | -0.9224777 | 0.586 | 0.753 | 1 | 19 |
| Ost4.2      | 0.00043951 | 0.39711259 | 0.724 | 0.352 | 1 | 19 |
| Ighm.14     | 0.00045603 | -1.9857284 | 0.103 | 0.416 | 1 | 19 |
| Ccl9.7      | 0.00045752 | 0.58351295 | 0.517 | 0.232 | 1 | 19 |
| Lcp1.7      | 0.00053151 | -1.0565201 | 0.276 | 0.535 | 1 | 19 |
| Cmtm7.2     | 0.00054038 | 0.40187383 | 0.517 | 0.221 | 1 | 19 |
| Rnpep       | 0.00059372 | 0.28564403 | 0.276 | 0.085 | 1 | 19 |
| Zeb2.16     | 0.00062023 | 0.54553487 | 0.621 | 0.294 | 1 | 19 |
| Ifitm6.4    | 0.00063282 | 0.54014472 | 0.345 | 0.126 | 1 | 19 |
| Znhit1.1    | 0.00066994 | 0.37642767 | 0.276 | 0.089 | 1 | 19 |
| Mrps15      | 0.00071047 | 0.37995989 | 0.379 | 0.143 | 1 | 19 |
| Klf6.13     | 0.0007151  | 0.33531886 | 0.862 | 0.529 | 1 | 19 |
| Ptprc.8     | 0.00079748 | -1.2093408 | 0.172 | 0.442 | 1 | 19 |
| Gmfg.3      | 0.00080662 | 0.37620215 | 0.69  | 0.341 | 1 | 19 |
| Ets2.2      | 0.00088021 | 0.48027041 | 0.379 | 0.147 | 1 | 19 |
| Fermt3.1    | 0.0009272  | 0.50967522 | 0.414 | 0.179 | 1 | 19 |
| 2900097C17R | 0.00092868 | 0.3368815  | 0.276 | 0.09  | 1 | 19 |

|            |            |            |       |       |           |    |
|------------|------------|------------|-------|-------|-----------|----|
| Psemb8.8   | 0.00093263 | -1.0967358 | 0.241 | 0.481 | 1         | 19 |
| Sptbn1.2   | 0.00094053 | 0.67498677 | 0.379 | 0.161 | 1         | 19 |
| Nenf.1     | 0.00100295 | 0.44557758 | 0.379 | 0.149 | 1         | 19 |
| Bcl2a1b.7  | 0.00101536 | 0.54866062 | 0.448 | 0.198 | 1         | 19 |
| Ppib.2     | 0.00103742 | 0.41378922 | 0.759 | 0.41  | 1         | 19 |
| Btg1.12    | 0.00107046 | -0.8876201 | 0.31  | 0.574 | 1         | 19 |
| Dbi.10     | 0.00108414 | 0.55550356 | 0.552 | 0.291 | 1         | 19 |
| Ssr4.6     | 0.0010852  | 0.52291752 | 0.655 | 0.369 | 1         | 19 |
| Gtf2h5.1   | 0.00109483 | 0.47188547 | 0.345 | 0.13  | 1         | 19 |
| Sft2d1     | 0.00119103 | 0.26801871 | 0.448 | 0.179 | 1         | 19 |
| Msrbl.1    | 0.00126161 | 0.40062378 | 0.31  | 0.116 | 1         | 19 |
| Blvrb.2    | 0.00126524 | 0.32131879 | 0.517 | 0.22  | 1         | 19 |
| Prdx6.4    | 0.00128682 | 0.56415177 | 0.414 | 0.182 | 1         | 19 |
| Junb.13    | 0.00135108 | 0.32487829 | 1     | 0.842 | 1         | 19 |
| Tgfb.7     | 0.00135785 | 0.36027498 | 0.517 | 0.235 | 1         | 19 |
| Hexb.2     | 0.001359   | 0.30950244 | 0.379 | 0.148 | 1         | 19 |
| Nfkb.13    | 0.00137618 | 0.34462829 | 0.759 | 0.44  | 1         | 19 |
| Cox6a1.3   | 0.00138635 | 0.45232548 | 0.724 | 0.426 | 1         | 19 |
| Ptprcap.17 | 0.00142407 | -1.4191323 | 0     | 0.266 | 1         | 19 |
| Napsa.16   | 0.00145832 | -1.2989698 | 0     | 0.265 | 1         | 19 |
| Drap1      | 0.00146009 | 0.41500213 | 0.276 | 0.097 | 1         | 19 |
| Lamp1.16   | 0.00147061 | 0.30375427 | 0.793 | 0.413 | 1         | 19 |
| Trf.2      | 0.001502   | 0.49650499 | 0.448 | 0.197 | 1         | 19 |
| Ncf2.3     | 0.00151215 | 0.37317798 | 0.414 | 0.174 | 1         | 19 |
| Manf.1     | 0.00163702 | 0.42952951 | 0.448 | 0.204 | 1         | 19 |
| Myh9.11    | 0.00188634 | -1.0180975 | 0.276 | 0.503 | 1         | 19 |
| H2-Aa.8    | 1.09E-96   | -2.9607645 | 0.154 | 0.766 | 1.80E-92  | 10 |
| Rps24.10   | 0.00203196 | -0.3679369 | 1     | 0.988 | 1         | 19 |
| Cd79a.17   | 0.00205366 | -2.195756  | 0     | 0.252 | 1         | 19 |
| Ptms.15    | 0.00209951 | -1.1922616 | 0.034 | 0.289 | 1         | 19 |
| H2-Ab1.5   | 7.27E-125  | -2.97216   | 0.09  | 0.741 | 1.20E-120 | 7  |
| Ndufa1.1   | 0.00216882 | 0.35343729 | 0.448 | 0.202 | 1         | 19 |
| C3ar1.2    | 0.00216971 | 0.27482301 | 0.345 | 0.13  | 1         | 19 |
| Sod2       | 0.00221275 | 0.3794563  | 0.31  | 0.118 | 1         | 19 |
| Plin2.2    | 0.00226704 | 0.6028421  | 0.31  | 0.121 | 1         | 19 |
| Rpl18.8    | 0.00238684 | -0.4424743 | 0.966 | 0.923 | 1         | 19 |
| Zc3h12a    | 0.00265121 | 0.32568718 | 0.31  | 0.116 | 1         | 19 |
| Os9        | 0.00279337 | 0.38128547 | 0.345 | 0.142 | 1         | 19 |
| Ndufa4.2   | 0.00303309 | 0.34243047 | 0.793 | 0.409 | 1         | 19 |
| Ppp1r15a.9 | 0.00320767 | 0.48117689 | 0.621 | 0.356 | 1         | 19 |
| Rps2.9     | 0.0032309  | 0.28373021 | 1     | 0.943 | 1         | 19 |
| H2-Ab1.8   | 2.05E-94   | -3.0028859 | 0.075 | 0.733 | 3.37E-90  | 10 |
| Klf2.15    | 0.0032894  | 0.26114221 | 0.897 | 0.593 | 1         | 19 |



|              |            |            |       |       |   |    |
|--------------|------------|------------|-------|-------|---|----|
| Adam15.1     | 0.00335189 | 0.51340601 | 0.276 | 0.104 | 1 | 19 |
| Ncf1.3       | 0.00375396 | 0.44241574 | 0.345 | 0.145 | 1 | 19 |
| Eno1.10      | 0.003981   | 0.33290717 | 0.724 | 0.411 | 1 | 19 |
| Rpl8.10      | 0.00415626 | -0.4537359 | 0.931 | 0.917 | 1 | 19 |
| Irf2         | 0.00451749 | 0.42826183 | 0.345 | 0.152 | 1 | 19 |
| Rps15a.11    | 0.00472237 | -0.4357289 | 1     | 0.95  | 1 | 19 |
| Mrc1.17      | 0.00498018 | -1.333578  | 0.069 | 0.307 | 1 | 19 |
| Glud1.5      | 0.00499845 | 0.27230645 | 0.552 | 0.267 | 1 | 19 |
| Atp6v1a.1    | 0.00508146 | 0.48904159 | 0.276 | 0.11  | 1 | 19 |
| Sec61a1.1    | 0.00523145 | 0.41633864 | 0.276 | 0.109 | 1 | 19 |
| Ndfip1.6     | 0.0054081  | -0.9644299 | 0.069 | 0.298 | 1 | 19 |
| Lrrc25.3     | 0.00574047 | 0.34075051 | 0.31  | 0.127 | 1 | 19 |
| Rgs10.13     | 0.00589054 | 0.39315927 | 0.517 | 0.275 | 1 | 19 |
| 1110008F13Ri | 0.00603045 | 0.30473718 | 0.414 | 0.192 | 1 | 19 |
| Gstm1.14     | 0.00611318 | -0.8047594 | 0.517 | 0.646 | 1 | 19 |
| Unc119.2     | 0.00613644 | 0.25113765 | 0.276 | 0.106 | 1 | 19 |
| Snx5.14      | 0.00620865 | -1.0580452 | 0.103 | 0.318 | 1 | 19 |
| Atp6v0b.12   | 0.00633922 | 0.36319854 | 0.621 | 0.359 | 1 | 19 |
| Psmc7        | 0.00661384 | 0.30811569 | 0.276 | 0.11  | 1 | 19 |
| Fkbp2.4      | 0.00682675 | 0.40250674 | 0.379 | 0.179 | 1 | 19 |
| Ehd1.3       | 0.00683657 | 0.29360061 | 0.414 | 0.193 | 1 | 19 |
| Nfic         | 0.00689513 | 0.27999496 | 0.276 | 0.109 | 1 | 19 |
| Psma2.3      | 0.00715723 | 0.3797296  | 0.448 | 0.227 | 1 | 19 |
| Rpl19.10     | 0.0074676  | -0.362529  | 0.966 | 0.955 | 1 | 19 |
| Hmgb2.6      | 0.00749714 | -1.0632978 | 0.034 | 0.251 | 1 | 19 |
| Spi1.14      | 0.00754982 | 0.30220148 | 0.552 | 0.304 | 1 | 19 |
| Nme2.6       | 0.00772071 | 0.41845488 | 0.897 | 0.55  | 1 | 19 |
| Trib1.5      | 0.00772548 | 0.29399206 | 0.448 | 0.226 | 1 | 19 |
| Cyfip1.3     | 0.00789571 | 0.36600579 | 0.379 | 0.177 | 1 | 19 |
| Gusb.2       | 0.00828396 | 0.41282636 | 0.276 | 0.118 | 1 | 19 |
| Apbb1ip.4    | 0.00873147 | 0.26745229 | 0.414 | 0.202 | 1 | 19 |
| Sem1.9       | 0.0087326  | 0.43760616 | 0.828 | 0.548 | 1 | 19 |
| Cox6c.5      | 0.00916675 | 0.31594889 | 0.724 | 0.446 | 1 | 19 |
| Rpl18a.9     | 0.00934091 | -0.3477127 | 1     | 0.962 | 1 | 19 |
| Nr4a2.5      | 0.00971457 | 0.59140971 | 0.414 | 0.201 | 1 | 19 |
| Sat1.12      | 0.00984723 | 0.34148832 | 0.586 | 0.338 | 1 | 19 |
| Id2.8        | 0.00996501 | 0.37571883 | 0.414 | 0.214 | 1 | 19 |
| Cox6a2       | 0          | 2.87076537 | 0.875 | 0.003 | 0 | 20 |
| Ccr9         | 0          | 2.21786159 | 0.792 | 0.004 | 0 | 20 |
| Klk1         | 0          | 1.61681627 | 0.333 | 0     | 0 | 20 |
| Dntt         | 0          | 1.44768803 | 0.458 | 0.002 | 0 | 20 |
| Gm21762      | 0          | 1.37461019 | 0.5   | 0     | 0 | 20 |
| Atp2a1       | 0          | 1.18577271 | 0.417 | 0.001 | 0 | 20 |

|           |           |            |       |       |           |    |
|-----------|-----------|------------|-------|-------|-----------|----|
| Klk1b27   | 0         | 1.01949247 | 0.375 | 0.001 | 0         | 20 |
| Grm8      | 0         | 0.95672126 | 0.333 | 0     | 0         | 20 |
| Obscn     | 0         | 0.94336213 | 0.417 | 0     | 0         | 20 |
| Sh3bgr    | 5.53E-292 | 0.85340083 | 0.292 | 0.001 | 9.09E-288 | 20 |
| Lrp8      | 4.32E-289 | 1.17684417 | 0.375 | 0.001 | 7.11E-285 | 20 |
| Smim5     | 9.68E-222 | 1.63554884 | 0.583 | 0.006 | 1.59E-217 | 20 |
| Pacsin1   | 8.36E-170 | 1.85643286 | 0.75  | 0.015 | 1.37E-165 | 20 |
| Atp1b1    | 9.40E-149 | 2.0845708  | 0.917 | 0.027 | 1.55E-144 | 20 |
| Siglech   | 2.54E-142 | 3.2393252  | 1     | 0.035 | 4.18E-138 | 20 |
| Cd300c    | 1.02E-129 | 0.86405165 | 0.292 | 0.003 | 1.68E-125 | 20 |
| Klra17    | 4.02E-125 | 0.95926963 | 0.292 | 0.003 | 6.62E-121 | 20 |
| Runx2     | 1.17E-121 | 1.85239416 | 0.708 | 0.019 | 1.92E-117 | 20 |
| Rpgrip1   | 7.30E-113 | 1.30448836 | 0.5   | 0.01  | 1.20E-108 | 20 |
| Mctp2     | 6.43E-106 | 1.05277026 | 0.458 | 0.009 | 1.06E-101 | 20 |
| Lefty1    | 3.33E-101 | 1.01511034 | 0.333 | 0.005 | 5.48E-97  | 20 |
| Traf4     | 2.86E-83  | 1.51869756 | 0.583 | 0.019 | 4.71E-79  | 20 |
| Slpi.2    | 1.95E-75  | 1.28414915 | 0.542 | 0.018 | 3.20E-71  | 20 |
| Upb1      | 7.33E-65  | 1.73352595 | 0.708 | 0.037 | 1.21E-60  | 20 |
| Cyb561a3  | 7.59E-64  | 1.81454359 | 0.833 | 0.053 | 1.25E-59  | 20 |
| Nek6      | 4.96E-63  | 1.24219018 | 0.5   | 0.019 | 8.17E-59  | 20 |
| Sla2      | 3.72E-59  | 1.42207262 | 0.583 | 0.027 | 6.12E-55  | 20 |
| Lag3.2    | 6.68E-55  | 1.03339704 | 0.5   | 0.021 | 1.10E-50  | 20 |
| Lair1.1   | 1.33E-51  | 1.5087563  | 0.75  | 0.051 | 2.19E-47  | 20 |
| Rnase6.2  | 3.75E-49  | 1.96243689 | 0.958 | 0.098 | 6.16E-45  | 20 |
| Cd7.1     | 9.06E-43  | 1.53778004 | 0.708 | 0.055 | 1.49E-38  | 20 |
| N4bp3     | 1.44E-42  | 0.83631396 | 0.292 | 0.009 | 2.37E-38  | 20 |
| Slc41a2   | 1.18E-41  | 1.05764825 | 0.375 | 0.016 | 1.94E-37  | 20 |
| Slc44a2   | 4.69E-39  | 1.33971851 | 0.667 | 0.053 | 7.71E-35  | 20 |
| Sell      | 1.92E-37  | 1.53524444 | 0.833 | 0.086 | 3.16E-33  | 20 |
| Tbc1d8.3  | 1.12E-35  | 1.35610764 | 0.583 | 0.046 | 1.84E-31  | 20 |
| P2ry14    | 1.01E-33  | 1.08478487 | 0.333 | 0.016 | 1.67E-29  | 20 |
| Csf2rb2.1 | 6.52E-33  | 1.22668106 | 0.458 | 0.031 | 1.07E-28  | 20 |
| Ctsl.4    | 9.55E-33  | 2.03666455 | 0.917 | 0.136 | 1.57E-28  | 20 |
| Bst2.2    | 2.41E-31  | 2.69243435 | 1     | 0.216 | 3.96E-27  | 20 |
| Emid1     | 2.43E-30  | 0.80217455 | 0.292 | 0.013 | 3.99E-26  | 20 |
| Nucb2     | 2.45E-30  | 1.08635361 | 0.542 | 0.045 | 4.02E-26  | 20 |
| Srgap3    | 9.44E-29  | 1.07778081 | 0.333 | 0.019 | 1.55E-24  | 20 |
| Irf8.4    | 3.25E-28  | 2.10008859 | 1     | 0.229 | 5.35E-24  | 20 |
| Dnajc7.3  | 4.37E-28  | 1.47217442 | 0.917 | 0.149 | 7.18E-24  | 20 |
| Rell1     | 1.44E-27  | 1.37182792 | 0.625 | 0.067 | 2.36E-23  | 20 |
| Gapt      | 2.15E-27  | 0.97963597 | 0.333 | 0.019 | 3.54E-23  | 20 |
| Tmem229b  | 3.56E-27  | 1.13079666 | 0.5   | 0.043 | 5.85E-23  | 20 |
| Ly6c2.1   | 3.59E-27  | 1.49292995 | 0.583 | 0.058 | 5.91E-23  | 20 |

|            |          |            |       |       |          |    |
|------------|----------|------------|-------|-------|----------|----|
| Sirt3      | 7.76E-27 | 0.82492154 | 0.292 | 0.015 | 1.28E-22 | 20 |
| Tsc22d1    | 1.07E-26 | 1.39199868 | 0.5   | 0.044 | 1.77E-22 | 20 |
| Iglc3.4    | 3.06E-26 | 1.29664485 | 0.833 | 0.114 | 5.04E-22 | 20 |
| Plac8.3    | 2.18E-25 | 1.66044714 | 0.917 | 0.166 | 3.58E-21 | 20 |
| Mpeg1.5    | 5.18E-25 | 1.71260895 | 0.958 | 0.201 | 8.53E-21 | 20 |
| Ppfia4.1   | 6.11E-25 | 1.18473757 | 0.542 | 0.055 | 1.01E-20 | 20 |
| Arid3a     | 6.15E-25 | 0.99255207 | 0.417 | 0.033 | 1.01E-20 | 20 |
| Snx18      | 4.54E-24 | 1.2363931  | 0.583 | 0.064 | 7.47E-20 | 20 |
| Klrd1.2    | 1.06E-23 | 1.11424388 | 0.583 | 0.065 | 1.74E-19 | 20 |
| Tifa       | 1.08E-23 | 1.15175385 | 0.542 | 0.057 | 1.77E-19 | 20 |
| Slc15a4    | 2.09E-23 | 1.13128125 | 0.458 | 0.042 | 3.44E-19 | 20 |
| Tcf4.3     | 3.87E-23 | 1.35850962 | 0.875 | 0.151 | 6.37E-19 | 20 |
| Tspan13.5  | 2.04E-22 | 1.48881797 | 0.875 | 0.163 | 3.36E-18 | 20 |
| Edem2.2    | 2.38E-22 | 1.01091765 | 0.542 | 0.06  | 3.92E-18 | 20 |
| R3hdm4     | 5.57E-22 | 1.25412567 | 0.75  | 0.116 | 9.15E-18 | 20 |
| Cd300lf    | 6.98E-22 | 0.7651716  | 0.292 | 0.019 | 1.15E-17 | 20 |
| Khk.2      | 1.32E-21 | 1.06460701 | 0.458 | 0.046 | 2.17E-17 | 20 |
| Ptprs      | 8.47E-21 | 1.30242609 | 0.375 | 0.033 | 1.39E-16 | 20 |
| Ncf1.4     | 9.82E-21 | 1.50029213 | 0.792 | 0.144 | 1.61E-16 | 20 |
| Ldhb       | 1.23E-20 | 0.74957913 | 0.417 | 0.038 | 2.03E-16 | 20 |
| Npc1       | 1.51E-20 | 1.28253467 | 0.458 | 0.048 | 2.49E-16 | 20 |
| Dap.1      | 1.79E-20 | 1.28755328 | 0.708 | 0.114 | 2.95E-16 | 20 |
| Flt3.3     | 3.48E-20 | 0.79997447 | 0.417 | 0.04  | 5.72E-16 | 20 |
| Arhgap24   | 4.66E-20 | 0.70934436 | 0.333 | 0.026 | 7.67E-16 | 20 |
| Spib.1     | 5.39E-20 | 1.07304017 | 0.417 | 0.04  | 8.87E-16 | 20 |
| Kmo        | 1.09E-19 | 1.20117506 | 0.417 | 0.043 | 1.80E-15 | 20 |
| Scap       | 1.81E-19 | 0.68852666 | 0.292 | 0.021 | 2.97E-15 | 20 |
| Adpgk      | 3.84E-19 | 0.96451856 | 0.375 | 0.035 | 6.31E-15 | 20 |
| St8sia4.1  | 5.60E-19 | 1.4886849  | 0.708 | 0.124 | 9.21E-15 | 20 |
| AU040320   | 6.24E-19 | 0.89116426 | 0.375 | 0.035 | 1.03E-14 | 20 |
| Syne2      | 6.57E-19 | 0.87486602 | 0.375 | 0.035 | 1.08E-14 | 20 |
| Clec9a.1   | 7.15E-19 | 0.99500384 | 0.333 | 0.028 | 1.18E-14 | 20 |
| Ccl4.3     | 9.12E-19 | 1.17399725 | 0.75  | 0.13  | 1.50E-14 | 20 |
| Sec24d     | 1.73E-18 | 0.62770672 | 0.292 | 0.022 | 2.84E-14 | 20 |
| Rps6ka1    | 6.33E-18 | 1.21867646 | 0.625 | 0.102 | 1.04E-13 | 20 |
| Hpse       | 1.05E-17 | 0.79232513 | 0.333 | 0.03  | 1.73E-13 | 20 |
| Mvb12a.2   | 1.37E-17 | 1.26610878 | 0.625 | 0.104 | 2.25E-13 | 20 |
| Pafah1b3.2 | 3.68E-17 | 1.03438717 | 0.542 | 0.076 | 6.06E-13 | 20 |
| Jaml.2     | 4.31E-17 | 0.90134891 | 0.5   | 0.066 | 7.10E-13 | 20 |
| Pycr2      | 1.09E-16 | 0.75321933 | 0.417 | 0.047 | 1.80E-12 | 20 |
| Fes.1      | 1.22E-16 | 1.0236343  | 0.583 | 0.092 | 2.01E-12 | 20 |
| Sema4b     | 1.60E-16 | 1.06733593 | 0.292 | 0.025 | 2.64E-12 | 20 |
| Scimp      | 3.89E-16 | 0.89349779 | 0.333 | 0.033 | 6.41E-12 | 20 |

|             |          |            |       |       |          |    |
|-------------|----------|------------|-------|-------|----------|----|
| Fyn.1       | 5.38E-16 | 1.09620619 | 0.5   | 0.072 | 8.85E-12 | 20 |
| Selplg.11   | 1.75E-15 | 1.26456953 | 0.958 | 0.304 | 2.88E-11 | 20 |
| Gsn.4       | 1.81E-15 | 0.98767316 | 0.75  | 0.146 | 2.98E-11 | 20 |
| Pgls.1      | 2.63E-15 | 1.40489433 | 0.917 | 0.284 | 4.32E-11 | 20 |
| Grn.15      | 3.91E-15 | 1.42403381 | 1     | 0.374 | 6.42E-11 | 20 |
| Tmem106c    | 4.58E-15 | 0.70905515 | 0.333 | 0.034 | 7.53E-11 | 20 |
| 1700017B05R | 5.10E-15 | 0.63998124 | 0.333 | 0.034 | 8.39E-11 | 20 |
| Bcl11a      | 1.31E-14 | 1.00082559 | 0.417 | 0.055 | 2.16E-10 | 20 |
| Pmepa1      | 1.48E-14 | 0.56552873 | 0.292 | 0.027 | 2.43E-10 | 20 |
| Tyrobp.17   | 1.57E-14 | 1.26972686 | 1     | 0.607 | 2.58E-10 | 20 |
| Rabgap1l.2  | 2.21E-14 | 0.81255362 | 0.542 | 0.084 | 3.64E-10 | 20 |
| Hmgn3       | 2.85E-14 | 0.7368771  | 0.292 | 0.029 | 4.69E-10 | 20 |
| Uso1        | 4.91E-14 | 0.89603371 | 0.417 | 0.056 | 8.07E-10 | 20 |
| Stambpl1    | 5.03E-14 | 0.7303473  | 0.292 | 0.029 | 8.27E-10 | 20 |
| Cdip1       | 8.66E-14 | 0.7219586  | 0.292 | 0.029 | 1.43E-09 | 20 |
| Gpr171.1    | 9.65E-14 | 1.03565176 | 0.5   | 0.079 | 1.59E-09 | 20 |
| Pld4.13     | 1.51E-13 | 1.33321935 | 0.917 | 0.324 | 2.48E-09 | 20 |
| Ap1ar       | 1.75E-13 | 0.70968812 | 0.292 | 0.03  | 2.88E-09 | 20 |
| Rufy1       | 2.19E-13 | 0.94080625 | 0.375 | 0.049 | 3.60E-09 | 20 |
| Dpf2        | 2.30E-13 | 0.79775532 | 0.417 | 0.057 | 3.78E-09 | 20 |
| Gng10.4     | 4.33E-13 | 1.1158959  | 0.792 | 0.212 | 7.12E-09 | 20 |
| Rpl31.3     | 7.60E-13 | 1.16194469 | 1     | 0.495 | 1.25E-08 | 20 |
| Xbp1.2      | 8.97E-13 | 1.25001484 | 0.708 | 0.171 | 1.48E-08 | 20 |
| Blnk.2      | 9.05E-13 | 0.95305019 | 0.625 | 0.125 | 1.49E-08 | 20 |
| Fcrla.2     | 9.23E-13 | 0.92303025 | 0.458 | 0.073 | 1.52E-08 | 20 |
| Tmed3.1     | 5.31E-12 | 0.85179963 | 0.625 | 0.131 | 8.74E-08 | 20 |
| Cmah.1      | 6.62E-12 | 0.97099788 | 0.458 | 0.077 | 1.09E-07 | 20 |
| Gnas.4      | 9.22E-12 | 1.17992642 | 1     | 0.472 | 1.52E-07 | 20 |
| Rnaset2b.2  | 1.05E-11 | 0.99607683 | 0.792 | 0.217 | 1.73E-07 | 20 |
| Plaur.2     | 1.73E-11 | 1.21966146 | 0.5   | 0.1   | 2.85E-07 | 20 |
| Glrx3       | 1.86E-11 | 0.75342911 | 0.583 | 0.118 | 3.06E-07 | 20 |
| Aaed1       | 2.18E-11 | 0.58527172 | 0.333 | 0.044 | 3.58E-07 | 20 |
| Aff3        | 2.63E-11 | 0.64248248 | 0.292 | 0.035 | 4.32E-07 | 20 |
| Hs3st1.1    | 3.20E-11 | 0.53876487 | 0.375 | 0.054 | 5.26E-07 | 20 |
| Adssl1      | 3.21E-11 | 0.76667016 | 0.333 | 0.046 | 5.29E-07 | 20 |
| Cd180.1     | 3.32E-11 | 0.91858847 | 0.542 | 0.108 | 5.47E-07 | 20 |
| Cdkn2d.1    | 4.79E-11 | 0.69112764 | 0.375 | 0.057 | 7.88E-07 | 20 |
| Slamf9.2    | 4.97E-11 | 0.93648858 | 0.542 | 0.111 | 8.17E-07 | 20 |
| Zbtb38      | 6.58E-11 | 0.59383821 | 0.375 | 0.056 | 1.08E-06 | 20 |
| Sec61b.10   | 8.00E-11 | 0.94763329 | 1     | 0.481 | 1.32E-06 | 20 |
| Fgfr1op2    | 1.54E-10 | 0.8201378  | 0.625 | 0.147 | 2.53E-06 | 20 |
| Cybb.14     | 2.13E-10 | 0.92151799 | 0.917 | 0.327 | 3.50E-06 | 20 |
| Rnf187.2    | 2.25E-10 | 1.01004313 | 0.708 | 0.191 | 3.71E-06 | 20 |

|           |          |            |       |       |            |    |
|-----------|----------|------------|-------|-------|------------|----|
| Pkig.2    | 2.88E-10 | 0.76212253 | 0.667 | 0.16  | 4.73E-06   | 20 |
| H13.5     | 3.08E-10 | 1.04424908 | 0.667 | 0.181 | 5.06E-06   | 20 |
| Fam46c.1  | 3.11E-10 | 0.64047347 | 0.333 | 0.049 | 5.12E-06   | 20 |
| Nceh1.1   | 3.21E-10 | 0.57948405 | 0.333 | 0.048 | 5.29E-06   | 20 |
| Gltp.11   | 3.99E-10 | 0.94541248 | 0.792 | 0.256 | 6.57E-06   | 20 |
| Zmiz2     | 4.58E-10 | 0.68164106 | 0.417 | 0.073 | 7.54E-06   | 20 |
| Uvrag.3   | 5.75E-10 | 0.81429114 | 0.667 | 0.171 | 9.45E-06   | 20 |
| Map3k1    | 6.64E-10 | 0.76171464 | 0.5   | 0.104 | 1.09E-05   | 20 |
| Golgb1    | 7.31E-10 | 0.87939646 | 0.542 | 0.119 | 1.20E-05   | 20 |
| Fam174a.1 | 7.73E-10 | 0.67402169 | 0.667 | 0.161 | 1.27E-05   | 20 |
| Abhd17a   | 1.39E-09 | 0.63958859 | 0.417 | 0.076 | 2.29E-05   | 20 |
| Ifnar2.3  | 1.39E-09 | 0.95743068 | 0.667 | 0.189 | 2.29E-05   | 20 |
| Psap.15   | 1.70E-09 | 0.88087679 | 1     | 0.675 | 2.79E-05   | 20 |
| Trim25.1  | 2.05E-09 | 1.10691578 | 0.542 | 0.131 | 3.37E-05   | 20 |
| Cnp.2     | 2.24E-09 | 0.954882   | 0.542 | 0.124 | 3.69E-05   | 20 |
| Coro2a    | 2.63E-09 | 0.72440227 | 0.375 | 0.066 | 4.33E-05   | 20 |
| Snx5.15   | 2.67E-09 | 0.7729266  | 0.917 | 0.315 | 4.38E-05   | 20 |
| Il7r.4    | 2.86E-09 | 0.69624331 | 0.417 | 0.078 | 4.71E-05   | 20 |
| Fth1.16   | 3.67E-09 | 0.73405169 | 1     | 0.958 | 6.04E-05   | 20 |
| Syngn2.12 | 4.31E-09 | 1.08516385 | 0.75  | 0.246 | 7.09E-05   | 20 |
| Cib1      | 4.98E-09 | 0.69499215 | 0.458 | 0.094 | 8.19E-05   | 20 |
| Abhd17b   | 5.65E-09 | 0.97373494 | 0.375 | 0.071 | 9.29E-05   | 20 |
| Gtf2i     | 6.05E-09 | 0.64808823 | 0.417 | 0.08  | 9.94E-05   | 20 |
| Fyb.13    | 6.79E-09 | 0.73442201 | 0.792 | 0.248 | 0.00011169 | 20 |
| Ech1      | 8.64E-09 | 0.77679356 | 0.5   | 0.115 | 0.00014212 | 20 |
| Pltp.19   | 9.32E-09 | 0.81501152 | 0.917 | 0.335 | 0.00015337 | 20 |
| Grasp.3   | 9.95E-09 | 1.04787586 | 0.333 | 0.059 | 0.00016363 | 20 |
| Spcs3.1   | 1.22E-08 | 0.66529418 | 0.417 | 0.083 | 0.00020111 | 20 |
| Rexo2.3   | 1.35E-08 | 0.79796967 | 0.625 | 0.171 | 0.00022254 | 20 |
| Man1a2    | 1.52E-08 | 0.70449384 | 0.375 | 0.071 | 0.00025072 | 20 |
| Hyou1.1   | 2.24E-08 | 0.53299605 | 0.333 | 0.058 | 0.00036909 | 20 |
| Trappc5   | 2.33E-08 | 0.88844244 | 0.417 | 0.088 | 0.0003825  | 20 |
| Smc6.1    | 2.76E-08 | 0.78344886 | 0.5   | 0.122 | 0.00045336 | 20 |
| Ctsh.14   | 2.82E-08 | 0.90386138 | 0.875 | 0.384 | 0.00046446 | 20 |
| Rac2.14   | 3.00E-08 | 0.80719901 | 0.958 | 0.48  | 0.00049387 | 20 |
| Nedd9     | 3.18E-08 | 0.6642209  | 0.375 | 0.073 | 0.00052336 | 20 |
| Pip5k1c.1 | 3.31E-08 | 0.71194505 | 0.375 | 0.074 | 0.00054504 | 20 |
| Plekhm3   | 3.42E-08 | 0.68370962 | 0.333 | 0.061 | 0.00056195 | 20 |
| Cd164.1   | 3.79E-08 | 0.76479421 | 0.5   | 0.121 | 0.00062417 | 20 |
| Uggt1     | 4.02E-08 | 0.69752768 | 0.375 | 0.075 | 0.00066206 | 20 |
| Apobec3.4 | 4.15E-08 | 0.89737524 | 0.625 | 0.192 | 0.00068329 | 20 |
| Gm5617.1  | 4.45E-08 | 0.52622232 | 0.292 | 0.047 | 0.00073176 | 20 |
| Parvg     | 4.78E-08 | 0.8063526  | 0.292 | 0.049 | 0.00078681 | 20 |

|           |          |            |       |       |            |    |
|-----------|----------|------------|-------|-------|------------|----|
| Svbp      | 5.08E-08 | 0.86780273 | 0.375 | 0.076 | 0.00083566 | 20 |
| Tmem258.2 | 5.52E-08 | 0.72539044 | 0.75  | 0.252 | 0.00090844 | 20 |
| Ssr1      | 6.36E-08 | 0.67833039 | 0.417 | 0.09  | 0.00104638 | 20 |
| Sp140.3   | 6.45E-08 | 0.88211822 | 0.583 | 0.168 | 0.00106126 | 20 |
| Atp13a2   | 6.70E-08 | 0.62668216 | 0.333 | 0.06  | 0.00110239 | 20 |
| Slc38a1   | 7.80E-08 | 0.77258731 | 0.5   | 0.129 | 0.00128258 | 20 |
| Rilpl2.4  | 9.02E-08 | 0.86611632 | 0.667 | 0.215 | 0.00148365 | 20 |
| Tagln2.13 | 1.05E-07 | 0.79833858 | 0.958 | 0.488 | 0.00171988 | 20 |
| Dync1h1   | 1.05E-07 | 0.89352678 | 0.583 | 0.163 | 0.00172497 | 20 |
| Ubxn4.1   | 1.07E-07 | 0.90207535 | 0.542 | 0.159 | 0.00176537 | 20 |
| Cyth4.3   | 1.21E-07 | 0.87002081 | 0.667 | 0.231 | 0.00199798 | 20 |
| Tapbp.1   | 1.82E-07 | 0.61320312 | 0.75  | 0.242 | 0.00299541 | 20 |
| Ell2      | 1.96E-07 | 0.6917871  | 0.292 | 0.052 | 0.00323074 | 20 |
| Emc10     | 2.13E-07 | 0.6334298  | 0.542 | 0.145 | 0.00349758 | 20 |
| Ctsb.17   | 2.31E-07 | 0.63836126 | 1     | 0.474 | 0.00379911 | 20 |
| Stx7.1    | 2.45E-07 | 0.77921107 | 0.542 | 0.155 | 0.00402364 | 20 |
| Ramp1.4   | 2.59E-07 | 0.59743501 | 0.5   | 0.129 | 0.00426059 | 20 |
| Dock10.4  | 2.73E-07 | 0.57909946 | 0.667 | 0.201 | 0.00449276 | 20 |
| Serp1.9   | 3.11E-07 | 0.70985907 | 0.875 | 0.374 | 0.00511431 | 20 |
| Csf2rb.5  | 3.13E-07 | 0.8481472  | 0.458 | 0.123 | 0.00514323 | 20 |
| Tmem55b   | 3.48E-07 | 0.58650918 | 0.458 | 0.111 | 0.00572366 | 20 |
| Ubl7      | 3.53E-07 | 0.57709042 | 0.333 | 0.066 | 0.00581051 | 20 |
| Selenos.2 | 3.56E-07 | 0.84004128 | 0.5   | 0.145 | 0.00585293 | 20 |
| Cd47.3    | 4.18E-07 | 0.77611412 | 0.792 | 0.348 | 0.00688056 | 20 |
| Sik1.1    | 5.06E-07 | 0.59673457 | 0.458 | 0.114 | 0.00831987 | 20 |
| Txndc5.1  | 5.06E-07 | 0.8004946  | 0.375 | 0.082 | 0.00833111 | 20 |
| Rogdi.3   | 5.10E-07 | 0.58385876 | 0.333 | 0.067 | 0.00838863 | 20 |
| Junb.14   | 5.21E-07 | -1.3426287 | 0.583 | 0.844 | 0.00857284 | 20 |
| Fam3c     | 5.31E-07 | 0.77575355 | 0.375 | 0.084 | 0.00873258 | 20 |
| Dusp1.12  | 6.31E-07 | -2.4412904 | 0.083 | 0.607 | 0.01037869 | 20 |
| Slc35c2   | 6.36E-07 | 0.56052449 | 0.333 | 0.069 | 0.01046857 | 20 |
| Ptpn6.9   | 6.87E-07 | 0.87051894 | 0.667 | 0.257 | 0.01129958 | 20 |
| Ctso      | 6.93E-07 | 0.6464065  | 0.292 | 0.055 | 0.01139416 | 20 |
| Card11.1  | 7.45E-07 | 0.91364172 | 0.333 | 0.072 | 0.01225725 | 20 |
| Emc2      | 8.21E-07 | 0.52410006 | 0.333 | 0.069 | 0.01349745 | 20 |
| Irf7.1    | 8.32E-07 | 0.60374739 | 0.292 | 0.055 | 0.01368571 | 20 |
| Tomm20.3  | 8.86E-07 | 0.6710259  | 0.708 | 0.252 | 0.01456646 | 20 |
| Fam98c    | 1.06E-06 | 0.49651774 | 0.292 | 0.056 | 0.01746725 | 20 |
| Tagap     | 1.11E-06 | 0.66939774 | 0.333 | 0.072 | 0.01820331 | 20 |
| Apc       | 1.11E-06 | 0.51773303 | 0.292 | 0.056 | 0.01828978 | 20 |
| Bloc1s2   | 1.17E-06 | 0.65865252 | 0.333 | 0.073 | 0.01922155 | 20 |
| Ube2e1    | 1.18E-06 | 0.65425082 | 0.375 | 0.088 | 0.01941723 | 20 |
| Ppp1r14b  | 1.22E-06 | 0.63597383 | 0.333 | 0.072 | 0.02013336 | 20 |

|            |          |            |       |       |            |    |
|------------|----------|------------|-------|-------|------------|----|
| Mef2c.4    | 1.29E-06 | 0.62797181 | 0.708 | 0.24  | 0.02119694 | 20 |
| Sash3      | 1.39E-06 | 0.62081864 | 0.333 | 0.072 | 0.02278298 | 20 |
| Prkca.1    | 1.39E-06 | 0.58202032 | 0.333 | 0.071 | 0.02293368 | 20 |
| Ywhae.2    | 1.58E-06 | 0.66167306 | 0.708 | 0.257 | 0.02592084 | 20 |
| Lpgat1     | 1.85E-06 | 0.67053038 | 0.292 | 0.059 | 0.03045331 | 20 |
| Ak2.2      | 2.05E-06 | 0.70543026 | 0.417 | 0.11  | 0.0337819  | 20 |
| Smim14.3   | 2.07E-06 | 0.58404164 | 0.583 | 0.181 | 0.03400329 | 20 |
| Prkcd.4    | 2.37E-06 | 0.62697642 | 0.583 | 0.182 | 0.03893884 | 20 |
| Slc29a3    | 2.46E-06 | 0.50301015 | 0.292 | 0.058 | 0.04038324 | 20 |
| Ptms.16    | 2.60E-06 | 0.66653971 | 0.75  | 0.286 | 0.04280967 | 20 |
| Ndufs3.1   | 2.77E-06 | 0.60349636 | 0.458 | 0.127 | 0.04560199 | 20 |
| Ptprcap.18 | 3.16E-06 | 0.43999105 | 0.792 | 0.264 | 0.05202322 | 20 |
| Amfr       | 3.47E-06 | 0.55139259 | 0.333 | 0.075 | 0.05706163 | 20 |
| Sun2       | 3.53E-06 | 0.59923147 | 0.417 | 0.109 | 0.05808771 | 20 |
| Map7d1.1   | 3.61E-06 | 0.62315623 | 0.417 | 0.112 | 0.05944013 | 20 |
| Tns1.1     | 3.80E-06 | 0.49125063 | 0.333 | 0.073 | 0.06244211 | 20 |
| Snap29     | 3.82E-06 | 0.46448273 | 0.292 | 0.059 | 0.06291556 | 20 |
| Rap1a.5    | 4.04E-06 | 0.7804858  | 0.667 | 0.273 | 0.06649821 | 20 |
| Arf1.2     | 4.08E-06 | 0.61215555 | 0.792 | 0.329 | 0.06707041 | 20 |
| Ccnd1.3    | 4.37E-06 | 0.63128888 | 0.458 | 0.131 | 0.07195883 | 20 |
| Cnot8      | 4.39E-06 | 0.53982585 | 0.292 | 0.061 | 0.07221001 | 20 |
| Arhgap17   | 4.42E-06 | 0.58998494 | 0.458 | 0.129 | 0.07275851 | 20 |
| Arhgef6    | 4.50E-06 | 0.59610764 | 0.417 | 0.108 | 0.07400767 | 20 |
| Mydgf      | 4.73E-06 | 0.6461447  | 0.333 | 0.079 | 0.07785987 | 20 |
| Hsp90b1.7  | 5.38E-06 | 0.71362803 | 0.833 | 0.474 | 0.08855385 | 20 |
| Reep5.5    | 5.52E-06 | 0.82680152 | 0.75  | 0.353 | 0.09078562 | 20 |
| Gmps       | 5.53E-06 | 0.36772933 | 0.292 | 0.06  | 0.09103239 | 20 |
| Etv6.1     | 6.09E-06 | 0.56981282 | 0.375 | 0.095 | 0.10011018 | 20 |
| Sec11c.5   | 6.34E-06 | 0.62365004 | 0.708 | 0.261 | 0.10428494 | 20 |
| Zyx.13     | 6.51E-06 | 0.5652646  | 0.708 | 0.262 | 0.10706198 | 20 |
| Ddost.1    | 7.30E-06 | 0.69356069 | 0.583 | 0.205 | 0.12002768 | 20 |
| Phf11b.2   | 7.30E-06 | 0.40660245 | 0.333 | 0.076 | 0.1201248  | 20 |
| Il21r.3    | 7.72E-06 | 0.46489737 | 0.417 | 0.11  | 0.1270329  | 20 |
| Cmtm7.3    | 8.04E-06 | 0.81363892 | 0.625 | 0.221 | 0.13222672 | 20 |
| Crip1.15   | 8.07E-06 | -1.8573408 | 0.542 | 0.721 | 0.13271186 | 20 |
| Copg1      | 8.14E-06 | 0.49635917 | 0.292 | 0.063 | 0.13392391 | 20 |
| Vcp.4      | 8.17E-06 | 0.60343057 | 0.667 | 0.259 | 0.13437911 | 20 |
| Dctn3.1    | 8.22E-06 | 0.49697668 | 0.542 | 0.165 | 0.13514527 | 20 |
| Abcg1.1    | 8.45E-06 | 0.64940045 | 0.292 | 0.065 | 0.13904869 | 20 |
| Atraid     | 9.10E-06 | 0.61391159 | 0.375 | 0.098 | 0.14970442 | 20 |
| Fgr.3      | 1.05E-05 | 0.48508515 | 0.292 | 0.065 | 0.17251097 | 20 |
| Tmsb4x.14  | 1.06E-05 | -0.6389689 | 1     | 0.993 | 0.17426674 | 20 |
| D10Jhu81e  | 1.07E-05 | 0.45020314 | 0.292 | 0.064 | 0.17557528 | 20 |

|             |          |            |       |       |            |    |
|-------------|----------|------------|-------|-------|------------|----|
| Ly6d.15     | 1.11E-05 | 1.27835224 | 0.667 | 0.307 | 0.18194974 | 20 |
| Ivns1abp.1  | 1.14E-05 | 0.56136109 | 0.333 | 0.081 | 0.18714986 | 20 |
| H2-Ab1.9    | 5.30E-06 | -3.01928   | 0.07  | 0.724 | 8.72E-56   | 12 |
| Lgals1.14   | 1.32E-05 | 0.63956251 | 0.833 | 0.402 | 0.21643666 | 20 |
| Herpud1.6   | 1.33E-05 | 0.67596116 | 0.542 | 0.185 | 0.2191549  | 20 |
| Runx3.1     | 1.34E-05 | 0.48448165 | 0.375 | 0.097 | 0.21985221 | 20 |
| Commd6      | 1.36E-05 | 0.52446815 | 0.292 | 0.066 | 0.2228846  | 20 |
| Pdia3.3     | 1.36E-05 | 0.62006135 | 0.875 | 0.368 | 0.22435528 | 20 |
| Ly6e.13     | 1.38E-05 | 0.59772699 | 0.958 | 0.75  | 0.22710358 | 20 |
| Mrpl43      | 1.46E-05 | 0.44292939 | 0.375 | 0.097 | 0.23974163 | 20 |
| Lrrc59      | 1.48E-05 | 0.49376256 | 0.292 | 0.066 | 0.24304727 | 20 |
| 11-Sep      | 1.50E-05 | 0.62854058 | 0.333 | 0.084 | 0.24720757 | 20 |
| Jund.13     | 1.52E-05 | -1.4939307 | 0.292 | 0.684 | 0.24940803 | 20 |
| Manf.2      | 1.58E-05 | 0.58694803 | 0.583 | 0.203 | 0.25938351 | 20 |
| Unc93b1.9   | 1.60E-05 | 0.50572978 | 0.958 | 0.461 | 0.26279603 | 20 |
| Itgal.4     | 1.61E-05 | 0.57136904 | 0.417 | 0.117 | 0.26509458 | 20 |
| Lyz2.19     | 1.65E-05 | -2.9520805 | 0.125 | 0.556 | 0.27100053 | 20 |
| Arl5c.3     | 1.66E-05 | 0.59145161 | 0.292 | 0.068 | 0.2725401  | 20 |
| Cops4       | 1.66E-05 | 0.60084803 | 0.292 | 0.068 | 0.27302117 | 20 |
| Gns.3       | 1.67E-05 | 0.64119929 | 0.5   | 0.157 | 0.27388114 | 20 |
| Rpl10-ps3.6 | 1.70E-05 | 0.45240042 | 1     | 0.893 | 0.27940057 | 20 |
| Itpr1.1     | 1.75E-05 | 0.55949011 | 0.333 | 0.084 | 0.28787769 | 20 |
| Dctn6       | 1.82E-05 | 0.51183748 | 0.292 | 0.067 | 0.29944597 | 20 |
| Hnrnpul1    | 1.96E-05 | 0.49095254 | 0.458 | 0.136 | 0.32297669 | 20 |
| Pik3ap1     | 2.00E-05 | 0.68304048 | 0.333 | 0.086 | 0.32862606 | 20 |
| Sec13       | 2.00E-05 | 0.65288004 | 0.375 | 0.105 | 0.32892592 | 20 |
| Pqbp1       | 2.10E-05 | 0.50672645 | 0.292 | 0.067 | 0.3448495  | 20 |
| Top1        | 2.13E-05 | 0.59986337 | 0.625 | 0.236 | 0.35004406 | 20 |
| Rbm47.1     | 2.43E-05 | 0.51329829 | 0.292 | 0.067 | 0.3993064  | 20 |
| 1110008P14R | 2.57E-05 | 0.61225417 | 0.375 | 0.106 | 0.42204538 | 20 |
| Mdp1        | 2.64E-05 | 0.48590611 | 0.292 | 0.068 | 0.43428884 | 20 |
| Rbm38       | 2.97E-05 | 0.4411914  | 0.292 | 0.068 | 0.48772774 | 20 |
| Dnajc1      | 2.97E-05 | 0.47759957 | 0.292 | 0.069 | 0.48875166 | 20 |
| Orai3       | 3.21E-05 | 0.48855968 | 0.292 | 0.069 | 0.52727727 | 20 |
| Eif5a.5     | 3.72E-05 | 0.65081778 | 0.875 | 0.423 | 0.61139741 | 20 |
| Tmed2.2     | 3.72E-05 | 0.57524909 | 0.667 | 0.257 | 0.61252748 | 20 |
| Ptpre.3     | 3.80E-05 | 0.51432769 | 0.458 | 0.144 | 0.62523563 | 20 |
| Psemb1.6    | 3.82E-05 | 0.65175674 | 0.708 | 0.31  | 0.62769167 | 20 |
| Chd9        | 4.26E-05 | 0.70621547 | 0.375 | 0.111 | 0.70142446 | 20 |
| mt-Co1.5    | 4.70E-05 | 0.32260235 | 1     | 0.989 | 0.77290917 | 20 |
| Pdia6.2     | 4.83E-05 | 0.6953032  | 0.542 | 0.203 | 0.79476022 | 20 |
| Ebp         | 5.00E-05 | 0.49617686 | 0.333 | 0.089 | 0.82201075 | 20 |
| Psemb8.9    | 5.07E-05 | 0.61089782 | 0.875 | 0.478 | 0.83453303 | 20 |



|             |            |            |       |       |            |    |
|-------------|------------|------------|-------|-------|------------|----|
| Rnaset2a.8  | 5.25E-05   | 0.62975601 | 0.667 | 0.277 | 0.86417103 | 20 |
| Senp6       | 5.87E-05   | 0.67904926 | 0.333 | 0.094 | 0.96629479 | 20 |
| Ucp2.9      | 5.94E-05   | 0.55601983 | 0.917 | 0.597 | 0.97626223 | 20 |
| Ddx47       | 6.04E-05   | 0.41378878 | 0.292 | 0.071 | 0.9935824  | 20 |
| Tgfb1.7     | 6.17E-05   | 0.56004799 | 0.75  | 0.327 | 1          | 20 |
| BC031181    | 6.43E-05   | 0.57337103 | 0.375 | 0.112 | 1          | 20 |
| Eprs.2      | 6.98E-05   | 0.45135414 | 0.417 | 0.128 | 1          | 20 |
| Sin3b       | 7.63E-05   | 0.64462736 | 0.458 | 0.156 | 1          | 20 |
| Lsp1.15     | 7.86E-05   | 0.44620685 | 0.875 | 0.395 | 1          | 20 |
| Nek7        | 8.45E-05   | 0.33849981 | 0.375 | 0.105 | 1          | 20 |
| Hmgb1.7     | 8.68E-05   | 0.56045576 | 0.833 | 0.418 | 1          | 20 |
| Mtdh.2      | 9.04E-05   | 0.54679469 | 0.75  | 0.351 | 1          | 20 |
| Rbm42       | 9.49E-05   | 0.35031788 | 0.458 | 0.145 | 1          | 20 |
| Rrbp1.13    | 9.56E-05   | 0.6125088  | 0.708 | 0.347 | 1          | 20 |
| H2-Eb1.5    | 1.03E-124  | -3.0579922 | 0.095 | 0.74  | 1.69E-120  | 7  |
| Creld2.1    | 0.00010067 | 0.35540979 | 0.292 | 0.074 | 1          | 20 |
| Stt3a       | 0.00010362 | 0.41443647 | 0.292 | 0.075 | 1          | 20 |
| Hmox2.1     | 0.00010457 | 0.65047219 | 0.458 | 0.156 | 1          | 20 |
| Tmed9.1     | 0.00010911 | 0.54778917 | 0.542 | 0.206 | 1          | 20 |
| Dnajb11.1   | 0.00011754 | 0.41276288 | 0.375 | 0.111 | 1          | 20 |
| Ttc14       | 0.00011773 | 0.41842573 | 0.333 | 0.093 | 1          | 20 |
| Hectd1.1    | 0.00011964 | 0.45942049 | 0.5   | 0.175 | 1          | 20 |
| Tmem176b.14 | 0.00012112 | -1.8366051 | 0.042 | 0.44  | 1          | 20 |
| Cct8.1      | 0.00012162 | 0.56757197 | 0.458 | 0.16  | 1          | 20 |
| BC004004    | 0.00012277 | 0.55308435 | 0.375 | 0.114 | 1          | 20 |
| Gdi2.8      | 0.00012293 | 0.76477017 | 0.75  | 0.374 | 1          | 20 |
| Ly6a.7      | 0.0001235  | 0.48424717 | 0.5   | 0.174 | 1          | 20 |
| Ndufs8      | 0.00012457 | 0.5797824  | 0.417 | 0.14  | 1          | 20 |
| Med10.1     | 0.00012466 | 0.36480885 | 0.292 | 0.074 | 1          | 20 |
| Gpcpd1.4    | 0.00012628 | 0.50767173 | 0.458 | 0.156 | 1          | 20 |
| Srp19       | 0.00012745 | 0.53244879 | 0.375 | 0.115 | 1          | 20 |
| Atp5c1.6    | 0.00012815 | 0.68709375 | 0.708 | 0.342 | 1          | 20 |
| Rsrp1       | 0.00013466 | 0.56178925 | 0.5   | 0.188 | 1          | 20 |
| Ufm1        | 0.00014194 | 0.73728179 | 0.292 | 0.082 | 1          | 20 |
| Prkcb.1     | 0.00014525 | 0.356353   | 0.458 | 0.148 | 1          | 20 |
| Cytip.11    | 0.00014697 | 0.55741685 | 0.708 | 0.326 | 1          | 20 |
| Xist.9      | 0.00014818 | 0.60065382 | 0.875 | 0.473 | 1          | 20 |
| Mzb1.3      | 0.00014829 | 0.45727517 | 0.375 | 0.111 | 1          | 20 |
| Fndc3a      | 0.00016324 | 0.43986504 | 0.292 | 0.077 | 1          | 20 |
| Hnrnpa2b1.4 | 0.00016361 | 0.51741274 | 0.875 | 0.552 | 1          | 20 |
| Gstp1.8     | 0.0001724  | 0.41825957 | 0.708 | 0.296 | 1          | 20 |
| B4galnt1.4  | 0.00017264 | 0.42512009 | 0.458 | 0.155 | 1          | 20 |
| Skap2.2     | 0.00017553 | 0.50034396 | 0.375 | 0.119 | 1          | 20 |

|            |            |            |       |       |   |    |
|------------|------------|------------|-------|-------|---|----|
| Usp4       | 0.00018217 | 0.41163311 | 0.292 | 0.078 | 1 | 20 |
| Clic4.15   | 0.00018341 | 0.43978808 | 0.625 | 0.251 | 1 | 20 |
| Vim.15     | 0.00020237 | -1.4071482 | 0.333 | 0.623 | 1 | 20 |
| Ifitm3.16  | 0.00020498 | -1.4725633 | 0.083 | 0.492 | 1 | 20 |
| Psme2.8    | 0.00020839 | 0.57658515 | 0.667 | 0.334 | 1 | 20 |
| Lsm12.1    | 0.0002135  | 0.54292467 | 0.375 | 0.122 | 1 | 20 |
| Laptm5.7   | 0.0002297  | 0.46844858 | 0.958 | 0.654 | 1 | 20 |
| Mtpn.1     | 0.00023199 | 0.34631432 | 0.458 | 0.154 | 1 | 20 |
| Cd83.15    | 0.00023707 | -1.6521903 | 0.125 | 0.472 | 1 | 20 |
| Mbnl1.6    | 0.00024502 | 0.4500643  | 0.75  | 0.339 | 1 | 20 |
| Dennd4a.6  | 0.00024875 | 0.3763774  | 0.625 | 0.242 | 1 | 20 |
| Ndufa3     | 0.00025902 | 0.36883711 | 0.625 | 0.245 | 1 | 20 |
| Mapre1.1   | 0.00026557 | 0.42031643 | 0.458 | 0.157 | 1 | 20 |
| Tra2a.1    | 0.00026563 | 0.41374793 | 0.458 | 0.157 | 1 | 20 |
| Foxo1      | 0.0002695  | 0.40536551 | 0.333 | 0.098 | 1 | 20 |
| Nolc1      | 0.00026978 | 0.5283214  | 0.292 | 0.083 | 1 | 20 |
| Rtf2.1     | 0.00027071 | 0.53877783 | 0.333 | 0.102 | 1 | 20 |
| Ctcf.1     | 0.00028236 | 0.4680919  | 0.333 | 0.101 | 1 | 20 |
| Otub1      | 0.00028305 | 0.43450077 | 0.333 | 0.1   | 1 | 20 |
| Litaf.10   | 0.00028746 | 0.49194607 | 0.625 | 0.262 | 1 | 20 |
| Gusb.3     | 0.00029068 | 0.39335445 | 0.375 | 0.118 | 1 | 20 |
| Rgs10.14   | 0.00029382 | 0.43834909 | 0.667 | 0.274 | 1 | 20 |
| Gadd45gip1 | 0.00029421 | 0.49441356 | 0.292 | 0.083 | 1 | 20 |
| Alox5ap.18 | 0.00030029 | 0.53096077 | 0.792 | 0.396 | 1 | 20 |
| Napa       | 0.00031069 | 0.60320377 | 0.333 | 0.107 | 1 | 20 |
| Itpr2.1    | 0.00033073 | 0.35184254 | 0.292 | 0.08  | 1 | 20 |
| Cope.2     | 0.00033087 | 0.46507738 | 0.5   | 0.191 | 1 | 20 |
| Ccl6.18    | 0.00033249 | -1.9600889 | 0.042 | 0.414 | 1 | 20 |
| Prr13.6    | 0.00033316 | 0.47654717 | 0.625 | 0.266 | 1 | 20 |
| Tnfaip8.6  | 0.00033406 | 0.41542895 | 0.5   | 0.184 | 1 | 20 |
| Pdia4.3    | 0.00033873 | 0.59042136 | 0.417 | 0.147 | 1 | 20 |
| Pigt       | 0.00034485 | 0.39233906 | 0.333 | 0.1   | 1 | 20 |
| Anapc5.1   | 0.00035026 | 0.47619072 | 0.417 | 0.144 | 1 | 20 |
| Actr10     | 0.00036857 | 0.4069438  | 0.292 | 0.082 | 1 | 20 |
| Stoml2     | 0.00037003 | 0.50493709 | 0.292 | 0.085 | 1 | 20 |
| Ap3d1      | 0.00037009 | 0.33390558 | 0.333 | 0.099 | 1 | 20 |
| Fam43a.1   | 0.00038494 | 0.28071832 | 0.333 | 0.097 | 1 | 20 |
| Grina.1    | 0.00038642 | 0.49055463 | 0.375 | 0.125 | 1 | 20 |
| Polr2m     | 0.00038831 | 0.46363439 | 0.292 | 0.084 | 1 | 20 |
| Prdx5.13   | 0.00039868 | 0.39223978 | 0.75  | 0.334 | 1 | 20 |
| Cd52.14    | 0.00043302 | -1.0229926 | 0.667 | 0.734 | 1 | 20 |
| Egr1.15    | 0.00043449 | -2.1347065 | 0.125 | 0.459 | 1 | 20 |
| Sec11a     | 0.00043764 | 0.48980987 | 0.375 | 0.124 | 1 | 20 |

|             |            |            |       |       |   |    |
|-------------|------------|------------|-------|-------|---|----|
| Jun.16      | 0.00045287 | -2.1588464 | 0.125 | 0.463 | 1 | 20 |
| Tmed10.6    | 0.00045375 | 0.4416064  | 0.667 | 0.284 | 1 | 20 |
| Marcksl1.15 | 0.00045986 | -1.8409377 | 0.083 | 0.436 | 1 | 20 |
| Bri3bp.4    | 0.0004642  | 0.45361709 | 0.375 | 0.125 | 1 | 20 |
| Irf1.2      | 0.0004693  | 0.40733606 | 0.5   | 0.184 | 1 | 20 |
| Spn.1       | 0.00047213 | 0.33957787 | 0.292 | 0.083 | 1 | 20 |
| Ssr4.7      | 0.00048989 | 0.58297711 | 0.708 | 0.369 | 1 | 20 |
| Dbnl.1      | 0.00050384 | 0.51308334 | 0.5   | 0.2   | 1 | 20 |
| Ssr2.1      | 0.00051463 | 0.44633081 | 0.333 | 0.106 | 1 | 20 |
| Mt1.15      | 0.00054254 | -2.3882101 | 0.083 | 0.417 | 1 | 20 |
| Tmem219     | 0.00056688 | 0.36793662 | 0.333 | 0.104 | 1 | 20 |
| Rab24       | 0.0005793  | 0.41487879 | 0.333 | 0.105 | 1 | 20 |
| Washc2      | 0.00059187 | 0.43715535 | 0.292 | 0.085 | 1 | 20 |
| Mrfap1.2    | 0.00060389 | 0.53562119 | 0.625 | 0.272 | 1 | 20 |
| Dnajc3.2    | 0.00061779 | 0.48818747 | 0.542 | 0.235 | 1 | 20 |
| Eif3f.10    | 0.00064003 | 0.47107234 | 0.917 | 0.617 | 1 | 20 |
| Hspa5.4     | 0.00068578 | 0.46909384 | 0.792 | 0.462 | 1 | 20 |
| Tkt.3       | 0.00069729 | 0.3522137  | 0.542 | 0.215 | 1 | 20 |
| Dusp5.9     | 0.00070063 | 0.48658743 | 0.542 | 0.229 | 1 | 20 |
| Jtb         | 0.00071013 | 0.46993244 | 0.375 | 0.131 | 1 | 20 |
| C1qc.19     | 0.00072307 | -2.8345087 | 0     | 0.335 | 1 | 20 |
| Tmem176a.13 | 0.00073003 | -1.5785479 | 0     | 0.335 | 1 | 20 |
| Ccnd3.4     | 0.00073891 | 0.56225712 | 0.417 | 0.16  | 1 | 20 |
| Hmgn2.1     | 0.00075977 | 0.35592551 | 0.417 | 0.147 | 1 | 20 |
| Leprot.1    | 0.0007647  | 0.55038199 | 0.292 | 0.091 | 1 | 20 |
| Ccni.1      | 0.00076881 | 0.38332755 | 0.333 | 0.108 | 1 | 20 |
| Skil.3      | 0.00078637 | 0.36208446 | 0.375 | 0.127 | 1 | 20 |
| P2ry10.1    | 0.00079159 | 0.39120525 | 0.333 | 0.108 | 1 | 20 |
| C1qa.19     | 0.00080065 | -2.7118806 | 0     | 0.331 | 1 | 20 |
| Psme1.10    | 0.00080136 | 0.48379066 | 0.792 | 0.403 | 1 | 20 |
| Wfdc17.16   | 0.0008032  | -1.8372346 | 0     | 0.331 | 1 | 20 |
| Smg1        | 0.00080902 | 0.25860435 | 0.375 | 0.123 | 1 | 20 |
| Per1.2      | 0.0008437  | 0.57353692 | 0.333 | 0.114 | 1 | 20 |
| Cyfip2      | 0.00084554 | 0.31559487 | 0.333 | 0.106 | 1 | 20 |
| Naga.1      | 0.00084829 | 0.37887668 | 0.292 | 0.089 | 1 | 20 |
| Hmgn1.3     | 0.00085049 | 0.42575423 | 0.542 | 0.228 | 1 | 20 |
| Ripor2      | 0.00085794 | 0.30314275 | 0.333 | 0.104 | 1 | 20 |
| Ppia.8      | 0.00086284 | 0.34760852 | 0.958 | 0.888 | 1 | 20 |
| Atf3.13     | 0.00086485 | -1.6225142 | 0.208 | 0.508 | 1 | 20 |
| Cct7        | 0.00088271 | 0.25928148 | 0.458 | 0.165 | 1 | 20 |
| Srsf3.2     | 0.00089491 | 0.42748858 | 0.583 | 0.248 | 1 | 20 |
| Cd44.6      | 0.00091771 | 0.53559517 | 0.458 | 0.192 | 1 | 20 |
| Mybbp1a     | 0.0009188  | 0.32654624 | 0.292 | 0.087 | 1 | 20 |

|             |            |            |       |       |          |    |
|-------------|------------|------------|-------|-------|----------|----|
| Uchl3.3     | 0.00096811 | 0.3098597  | 0.292 | 0.088 | 1        | 20 |
| Nptn        | 0.00099468 | 0.25422129 | 0.375 | 0.125 | 1        | 20 |
| Hnrnpa3.3   | 0.00100486 | 0.45050365 | 0.875 | 0.502 | 1        | 20 |
| P4hb.2      | 0.00101145 | 0.47845181 | 0.542 | 0.236 | 1        | 20 |
| Rnh1.3      | 0.00104117 | 0.58038275 | 0.417 | 0.16  | 1        | 20 |
| Stt3b       | 0.00104854 | 0.41703691 | 0.292 | 0.092 | 1        | 20 |
| Saraf.4     | 0.00111994 | 0.37618391 | 0.458 | 0.173 | 1        | 20 |
| Rab11b      | 0.00115581 | 0.27279431 | 0.5   | 0.19  | 1        | 20 |
| Snapc5      | 0.00116486 | 0.36789541 | 0.292 | 0.091 | 1        | 20 |
| Sept9.6     | 0.00117851 | 0.41106221 | 0.417 | 0.158 | 1        | 20 |
| Eif4g1      | 0.00125423 | 0.32037666 | 0.458 | 0.174 | 1        | 20 |
| Ppp1r15a.10 | 0.00127791 | -1.329884  | 0.042 | 0.358 | 1        | 20 |
| Ndufb2      | 0.00127806 | 0.39121537 | 0.417 | 0.158 | 1        | 20 |
| Ppp1r11.1   | 0.00129529 | 0.3672649  | 0.458 | 0.178 | 1        | 20 |
| M6pr.3      | 0.00129778 | 0.34753036 | 0.458 | 0.177 | 1        | 20 |
| Tram1.1     | 0.00133133 | 0.28161891 | 0.375 | 0.131 | 1        | 20 |
| Eef2.6      | 0.00134056 | 0.43335358 | 0.958 | 0.731 | 1        | 20 |
| Cox7c.3     | 0.00138743 | 0.31425807 | 0.875 | 0.443 | 1        | 20 |
| Tmem30a     | 0.00140466 | 0.41096859 | 0.375 | 0.136 | 1        | 20 |
| Mff         | 0.00141165 | 0.46314181 | 0.292 | 0.094 | 1        | 20 |
| Pf4.20      | 0.00142808 | -2.6232343 | 0     | 0.307 | 1        | 20 |
| Atp2b1.10   | 0.00146302 | -1.3311483 | 0.042 | 0.348 | 1        | 20 |
| Pcif1       | 0.00146492 | 0.50703907 | 0.292 | 0.097 | 1        | 20 |
| Ier2.16     | 0.00147963 | -1.1336373 | 0.25  | 0.557 | 1        | 20 |
| Acaa1a.1    | 0.00148354 | 0.26593675 | 0.333 | 0.11  | 1        | 20 |
| Ifngr1.12   | 0.00150269 | -1.4015503 | 0.083 | 0.383 | 1        | 20 |
| Tpd52.2     | 0.00158208 | 0.39644984 | 0.417 | 0.16  | 1        | 20 |
| Stk4.3      | 0.00158413 | 0.51559972 | 0.417 | 0.162 | 1        | 20 |
| Fam107b.4   | 0.00160596 | 0.33051987 | 0.458 | 0.18  | 1        | 20 |
| Npc2.15     | 0.00162593 | 0.38356778 | 0.958 | 0.511 | 1        | 20 |
| H2-Aa.9     | 1.88E-64   | -3.0836238 | 0.091 | 0.759 | 3.08E-60 | 12 |
| Nrd1        | 0.00175538 | 0.37869799 | 0.333 | 0.116 | 1        | 20 |
| Ssna1.1     | 0.00178207 | 0.30251915 | 0.292 | 0.094 | 1        | 20 |
| Spcs1.2     | 0.00185838 | 0.35625561 | 0.542 | 0.232 | 1        | 20 |
| Krtcap2.5   | 0.00189121 | 0.50867134 | 0.625 | 0.295 | 1        | 20 |
| Mrpl17      | 0.00195301 | 0.30403761 | 0.333 | 0.114 | 1        | 20 |
| Apoe.18     | 0.0019615  | -2.7518043 | 0.208 | 0.471 | 1        | 20 |
| Acadl       | 0.00196831 | 0.46916272 | 0.292 | 0.099 | 1        | 20 |
| Ube3a       | 0.00199022 | 0.4471213  | 0.375 | 0.14  | 1        | 20 |
| Ifitm2.17   | 0.00202074 | -1.3607541 | 0.083 | 0.392 | 1        | 20 |
| Sod2.1      | 0.00203672 | 0.38360507 | 0.333 | 0.118 | 1        | 20 |
| Gpi1.3      | 0.00204104 | 0.4076729  | 0.667 | 0.312 | 1        | 20 |
| Atp5b.5     | 0.0021045  | 0.31002536 | 0.75  | 0.359 | 1        | 20 |

|            |            |            |       |       |           |   |    |
|------------|------------|------------|-------|-------|-----------|---|----|
| Ctsz.12    | 0.0021209  | 0.53211225 | 0.625 | 0.352 |           | 1 | 20 |
| Tax1bp1.4  | 0.00212279 | 0.47741574 | 0.583 | 0.274 |           | 1 | 20 |
| Cdk4.1     | 0.00212441 | 0.41542439 | 0.375 | 0.141 |           | 1 | 20 |
| G3bp1.1    | 0.00230422 | 0.43812827 | 0.417 | 0.172 |           | 1 | 20 |
| Sec61g.5   | 0.00231472 | 0.347723   | 0.708 | 0.345 |           | 1 | 20 |
| Cd81.10    | 0.0023277  | -1.3297855 | 0     | 0.287 |           | 1 | 20 |
| Rhog.6     | 0.00235363 | 0.37386731 | 0.625 | 0.291 |           | 1 | 20 |
| Bscl2      | 0.00235757 | 0.36736895 | 0.292 | 0.098 |           | 1 | 20 |
| Psm2.4     | 0.00235988 | 0.27601323 | 0.542 | 0.227 |           | 1 | 20 |
| S100a10.16 | 0.00237621 | -1.2875212 | 0.208 | 0.461 |           | 1 | 20 |
| Arpc3.4    | 0.00241886 | 0.47155415 | 0.833 | 0.525 |           | 1 | 20 |
| Slc25a4.1  | 0.0024495  | 0.40364535 | 0.292 | 0.099 |           | 1 | 20 |
| Rb1cc1     | 0.0024588  | 0.27220411 | 0.292 | 0.096 |           | 1 | 20 |
| H2-Aa.6    | 1.19E-137  | -3.1975056 | 0.095 | 0.777 | 1.95E-133 |   | 7  |
| Ier3.14    | 0.00249748 | -1.8035693 | 0.042 | 0.326 |           | 1 | 20 |
| Thrap3.1   | 0.00255288 | 0.35990224 | 0.417 | 0.164 |           | 1 | 20 |
| Klf4.14    | 0.00255554 | -1.6590454 | 0.083 | 0.376 |           | 1 | 20 |
| Cyc1       | 0.00257016 | 0.30194021 | 0.375 | 0.139 |           | 1 | 20 |
| Ctsa.15    | 0.00260038 | 0.28542122 | 0.625 | 0.283 |           | 1 | 20 |
| Stk17b.11  | 0.00262462 | 0.47734395 | 0.75  | 0.436 |           | 1 | 20 |
| Rnf13      | 0.00266133 | 0.46310086 | 0.292 | 0.102 |           | 1 | 20 |
| Tubb2a.3   | 0.00267725 | 0.41224946 | 0.292 | 0.1   |           | 1 | 20 |
| Fcgr2b.11  | 0.0027426  | -1.2575345 | 0     | 0.279 |           | 1 | 20 |
| Gm8797.1   | 0.00282988 | 0.3386938  | 0.5   | 0.208 |           | 1 | 20 |
| Epn1       | 0.00288156 | 0.33969581 | 0.458 | 0.191 |           | 1 | 20 |
| Rplp1.6    | 0.00294315 | -0.4020278 | 0.917 | 0.974 |           | 1 | 20 |
| Nsmce4a    | 0.00297858 | 0.3262075  | 0.292 | 0.1   |           | 1 | 20 |
| Csf1r.18   | 0.00297982 | -1.4747233 | 0.042 | 0.334 |           | 1 | 20 |
| Tm9sf2     | 0.00299848 | 0.2889675  | 0.333 | 0.119 |           | 1 | 20 |
| Glr5       | 0.00305817 | 0.29497158 | 0.292 | 0.098 |           | 1 | 20 |
| Nfkbiz.14  | 0.00306901 | -1.3317954 | 0.167 | 0.442 |           | 1 | 20 |
| AC149090.1 | 0.00307854 | 0.39804817 | 0.333 | 0.123 |           | 1 | 20 |
| Mpc1.1     | 0.00313638 | 0.40574953 | 0.458 | 0.199 |           | 1 | 20 |
| Ighm.15    | 0.00313985 | -0.4067046 | 0.833 | 0.413 |           | 1 | 20 |
| Got1.3     | 0.00318837 | 0.38249082 | 0.292 | 0.102 |           | 1 | 20 |
| Cct5       | 0.00318922 | 0.40465473 | 0.458 | 0.197 |           | 1 | 20 |
| C1qb.19    | 0.00324202 | -2.4990761 | 0.083 | 0.353 |           | 1 | 20 |
| Tecr.1     | 0.00325102 | 0.30689089 | 0.417 | 0.166 |           | 1 | 20 |
| Grcc10.5   | 0.00329675 | 0.34769115 | 0.75  | 0.399 |           | 1 | 20 |
| Papola     | 0.00353835 | 0.59667035 | 0.333 | 0.137 |           | 1 | 20 |
| Snx9       | 0.00354973 | 0.54495058 | 0.375 | 0.159 |           | 1 | 20 |
| Rnf149.2   | 0.00361087 | 0.41249897 | 0.292 | 0.104 |           | 1 | 20 |
| Ptpn1.4    | 0.00363935 | 0.32045956 | 0.542 | 0.246 |           | 1 | 20 |

|            |            |            |       |       |          |    |
|------------|------------|------------|-------|-------|----------|----|
| Sema4d.1   | 0.00370469 | 0.35485023 | 0.333 | 0.123 | 1        | 20 |
| Ndufs2.1   | 0.00376837 | 0.29129166 | 0.375 | 0.145 | 1        | 20 |
| Arpc1a     | 0.00384946 | 0.43400562 | 0.333 | 0.127 | 1        | 20 |
| Sdc4.2     | 0.00385089 | 0.36063898 | 0.458 | 0.197 | 1        | 20 |
| Klf6.14    | 0.00385247 | -1.3108858 | 0.333 | 0.531 | 1        | 20 |
| Birc6.1    | 0.00385343 | 0.42273134 | 0.417 | 0.176 | 1        | 20 |
| Ufc1       | 0.0038968  | 0.30856102 | 0.375 | 0.147 | 1        | 20 |
| Arl6ip5.2  | 0.0039495  | 0.28557925 | 0.417 | 0.166 | 1        | 20 |
| Mrc1.18    | 0.003987   | -1.7094496 | 0.042 | 0.306 | 1        | 20 |
| Mxd4       | 0.00406815 | 0.25764838 | 0.333 | 0.121 | 1        | 20 |
| Selenop.18 | 0.00412675 | -2.225853  | 0.167 | 0.417 | 1        | 20 |
| Morf4l2.1  | 0.00416931 | 0.26572645 | 0.292 | 0.101 | 1        | 20 |
| Psmb10.2   | 0.00419637 | 0.31600706 | 0.458 | 0.195 | 1        | 20 |
| Oaz1.5     | 0.00455741 | 0.30272687 | 0.958 | 0.775 | 1        | 20 |
| Smc1a.1    | 0.0045764  | 0.39579552 | 0.375 | 0.153 | 1        | 20 |
| Sp110      | 0.00463174 | 0.37823337 | 0.333 | 0.128 | 1        | 20 |
| Uqcrc2     | 0.00468539 | 0.27006454 | 0.333 | 0.124 | 1        | 20 |
| Cd68.14    | 0.0047315  | 0.29298959 | 0.583 | 0.271 | 1        | 20 |
| Tnrc6b.1   | 0.00480904 | 0.29645947 | 0.333 | 0.124 | 1        | 20 |
| Smdt1.8    | 0.00482593 | 0.28196847 | 0.708 | 0.351 | 1        | 20 |
| Dynll1.2   | 0.00498231 | 0.34125272 | 0.625 | 0.307 | 1        | 20 |
| Cbfa2t3.5  | 0.00511101 | 0.34164429 | 0.375 | 0.152 | 1        | 20 |
| Clec12a.3  | 0.00528461 | 0.4988279  | 0.292 | 0.111 | 1        | 20 |
| Ablim1.3   | 0.0053674  | 0.38140333 | 0.333 | 0.127 | 1        | 20 |
| Scand1.4   | 0.00542896 | 0.45096205 | 0.625 | 0.335 | 1        | 20 |
| Eif3l.1    | 0.00545986 | 0.25179264 | 0.292 | 0.105 | 1        | 20 |
| Cyfip1.4   | 0.00553155 | 0.36121615 | 0.417 | 0.177 | 1        | 20 |
| Gatad2b    | 0.00569659 | 0.31654508 | 0.292 | 0.107 | 1        | 20 |
| Atp6v1d.1  | 0.00592708 | 0.55914784 | 0.292 | 0.116 | 1        | 20 |
| Lyn.8      | 0.00595582 | 0.55824788 | 0.5   | 0.241 | 1        | 20 |
| Baz1b.1    | 0.00608784 | 0.35870063 | 0.292 | 0.109 | 1        | 20 |
| Pim1.10    | 0.00612416 | -1.0220153 | 0.208 | 0.45  | 1        | 20 |
| Lgals9     | 0.00616647 | 0.4764056  | 0.292 | 0.114 | 1        | 20 |
| H2-Eb1.8   | 5.44E-61   | -3.2141884 | 0.065 | 0.724 | 8.95E-57 | 12 |
| Shisa5.13  | 0.00636114 | -1.1945835 | 0.25  | 0.452 | 1        | 20 |
| Atg3.1     | 0.00658375 | 0.2573107  | 0.333 | 0.128 | 1        | 20 |
| Rbbp4.1    | 0.00662961 | 0.25826547 | 0.333 | 0.129 | 1        | 20 |
| Lsm8       | 0.00688969 | 0.44577062 | 0.292 | 0.115 | 1        | 20 |
| Rasa3      | 0.00699175 | 0.26918263 | 0.292 | 0.106 | 1        | 20 |
| Luc7l2.1   | 0.00721811 | 0.36459285 | 0.5   | 0.24  | 1        | 20 |
| Evi2a.1    | 0.0073519  | 0.48127958 | 0.292 | 0.115 | 1        | 20 |
| Rbm17.3    | 0.00745388 | 0.3769866  | 0.292 | 0.112 | 1        | 20 |
| Ccl2.17    | 0.00746629 | -2.0881483 | 0.042 | 0.282 | 1        | 20 |

|            |            |            |       |       |   |    |
|------------|------------|------------|-------|-------|---|----|
| Lgmn.16    | 0.00782076 | -1.3505969 | 0.042 | 0.28  | 1 | 20 |
| F13a1.16   | 0.00782366 | -1.6149063 | 0.042 | 0.28  | 1 | 20 |
| Lnpep      | 0.00788572 | 0.25129    | 0.375 | 0.155 | 1 | 20 |
| Limd2.9    | 0.00804016 | -1.1428363 | 0.125 | 0.357 | 1 | 20 |
| Nono.1     | 0.00811943 | 0.35344272 | 0.375 | 0.161 | 1 | 20 |
| Lrrfip1.2  | 0.00838577 | 0.30449015 | 0.375 | 0.159 | 1 | 20 |
| Nfkb1a.15  | 0.00845103 | -1.1411026 | 0.333 | 0.521 | 1 | 20 |
| Srsf7.2    | 0.00854898 | 0.30654922 | 0.458 | 0.215 | 1 | 20 |
| Glg1       | 0.00863965 | 0.2724301  | 0.333 | 0.135 | 1 | 20 |
| Taldo1.5   | 0.00891857 | 0.33764263 | 0.542 | 0.278 | 1 | 20 |
| Aurkaip1.1 | 0.00906577 | 0.45820454 | 0.375 | 0.17  | 1 | 20 |
| Lrp10.1    | 0.00944489 | 0.39764952 | 0.333 | 0.142 | 1 | 20 |
| Trim28.1   | 0.00954028 | 0.39881211 | 0.292 | 0.117 | 1 | 20 |
| Hnrnpk.1   | 0.00958244 | 0.30920323 | 0.667 | 0.363 | 1 | 20 |
| Psm5.3     | 0.00976275 | 0.26042009 | 0.458 | 0.206 | 1 | 20 |
| Prpf8.1    | 0.00981709 | 0.30757675 | 0.375 | 0.162 | 1 | 20 |
| Rpl27a.9   | 0.00997513 | -0.4302439 | 0.958 | 0.889 | 1 | 20 |

gene  
Ccl7  
Ccl12  
Ccl2  
C1qa  
Ccl8  
C1qc  
Pf4  
C1qb  
ApoE  
Cxcl2  
Selenop  
Jun  
Cbr2  
Ier3  
Mmp9  
Csf1r  
Mrc1  
Cd14  
Marcksl1  
Ms4a7  
Stab1  
C5ar1  
Ctsb  
Cd63  
Dab2  
Fos  
Egr1  
Mt1  
Grn  
Adgre1  
Lgmn  
Atf3  
Ifi207  
Nfkbiz  
C3ar1  
Cd163  
Fcgr3  
F13a1  
Igfbp4  
Folr2  
Lyz2  
Blvrb



Fosb  
Itm2b  
Zfp36  
Wwp1  
Gas6  
Ftl1  
Ninj1  
Ctsc  
Dusp1  
Maf  
Pltp  
Mafb  
Fcer1g  
Fth1  
Rps16  
Rps24  
Rpl13  
Rpl19  
Uba52  
Rps15a  
Rps7  
Rplp0  
Rpsa  
Tmsb10  
Cfp  
Fcrls  
Clec4n  
Tmem176b  
Igf1  
Rps5  
Fcgrt  
Rpl18  
Cd52  
Klf4  
Rpl8  
Ehd4  
Klf6  
Rpl18a  
Timp2  
Cd68  
Ltc4s  
Cfh  
Pla2g2d

Rps19  
App  
Cst3  
Fcna  
Rps3a1  
Pmp22  
Ifitm2  
Jund  
Rps10  
Rpl32  
Rps20  
Cd81  
Tyrobp  
Cltc  
Ccl24  
Coro1a  
Lamp1  
Neat1  
Cd209f  
Rpl9-ps6  
Ms4a4a  
Rhob  
Glul  
Pla2g7  
Junb  
Ctsl  
Rps3  
Trf  
Eef1a1  
Fau  
Aif1  
P2ry6  
Rgs10  
Rps27  
Ccl3  
Mgl2  
Rps26  
Atp6v0c  
Abca1  
Cd209g  
Rps8  
Fxyd2  
Rps18

Rps11  
Lst1  
Rps4x  
Hpgd  
Rps2  
Hexa  
Rpl6  
Stard8  
Rps27a  
Clec10a  
Ifitm3  
Cebpd  
Cd93  
Rgl1  
Nrp1  
Lsp1  
Zeb2  
Serinc3  
Rpl11  
Rpl13a  
C4b  
Rpl34  
Hmox1  
Rpl39  
Rpl30  
Rps13  
Rpl27a  
Itsn1  
Lyve1  
Clta  
Cytip  
Ccl6  
Rpl23  
Tmem106a  
Wfdc17  
Rpl12  
Rplp2  
Klf2  
Cd36  
Tmem176a  
Rpl36  
Camk1  
Socs3

Sdc4  
Sirpa  
Rpl14  
Rps14  
Ctsa  
Marcks  
Cited2  
Unc93b1  
Rpl37  
Tgfb1  
Rps23  
Rps6  
Rpl10a  
Egr2  
Rpl27  
Bri3  
Rpl28  
Nfkbia  
Rpl3  
Rpl35  
Mcl1  
Napsa  
Ctsd  
Rpl15  
Ptprcap  
Fcgr2b  
Gm10076  
Rpl37a  
Sat1  
Clec4a1  
Serp1nb6a  
Kctd12  
Rps9  
Gas7  
Clec4a2  
Btg1  
H3f3b  
Ubc  
Rpl29  
S100a11  
H2-M2  
Anxa5  
Lamp2

Atp6v0b  
Gm26532  
Tcn2  
Hacd4  
Cd79a  
Eef2  
Rac2  
Sertad1  
Cstb  
Ier2  
Asah1  
Rpl26  
Btg2  
Rpl22  
S100a6  
Cndp2  
Dhrs3  
Lmna  
Ftl1-ps1  
Rack1  
Npc2  
Ltb  
Cnn2  
Rpl24  
Cebpb  
Ier5  
Sdc3  
Rpl7  
Ppp1r10  
Vps37b  
Pld4  
Gpx1  
Shisa5  
Snx2  
Rps21  
Rpl36a  
Tubb6  
Lrrc25  
Dusp5  
Ifi2712a  
Rpl4  
Atp2b1  
Arrb2

Zfand5  
Rpl5  
Lmo2  
Rpl21  
Sbno2  
Mpp1  
Tpp1  
Bst2  
Eef1b2  
Ctss  
Eif3f  
Ap1b1  
Tgfbr2  
Pfn1  
Ctsh  
H2-M2  
Snx6  
Ezr  
Myo5a  
Gabarap  
Rtn4  
Rrbp1  
Ms4a6c  
Snx3  
Eps8  
Il2rg  
Ap2a2  
Cyfip1  
Gapdh  
Ets2  
Lipa  
Kdm6b  
Rps15  
Wsb1  
Myl12b  
Rpl38  
Actg1  
Abhd12  
Ptprc  
Akr1a1  
Psmb8  
Fxyd5  
Actb

Ctsz  
Arhgdib  
Slc6a6  
Calm2  
Ehd1  
Aplp2  
Creg1  
Ly6d  
Rpl9  
Comt  
Srgn  
Plek  
Fyb  
Ifnar2  
Myh9  
Sub1  
H2-DMb2  
Man2b1  
H2-Ob  
Ptafr  
Stk17b  
Nrros  
Rnf130  
Sdcbp  
Trib1  
Sqstm1  
Btf3  
Pnp  
Msn  
Limd2  
Rps12  
Ddx3x  
Vsir  
Rpl17  
Snx5  
Anxa2  
H2-Eb1  
BC005537  
Alox5ap  
AW112010  
Laptm4a  
Pid1  
Dennd4a

Clic4  
Pepd  
Rps28  
Eno1  
Nfkbid  
Tnfrsf1a  
Zcchc6  
Scamp2  
Naca  
Rpl23a  
Gadd45b  
Cd74  
Pabpc1  
Rassf4  
Ccl9  
Arhgap45  
Selplg  
Ly86  
Dnajb1  
Zfp36l1  
Eps15  
Hmox2  
Lgals1  
Gng5  
Rpl41  
Gpr132  
Spi1  
Gns  
Cd37  
Rnaset2a  
Rpl36al  
Vamp8  
Ppia  
Psme1  
Icam1  
Picalm  
Cd83  
Ifrd1  
Litaf  
Rbm3  
Ptma  
Aldh2  
Ucp2



Mtss1  
Ldha  
H2-Oa  
Rpl35a  
Rap1b  
H2afy  
Npm1  
mt-Nd4  
Eif5a  
Pkm  
Flna  
Gm2a  
Rpl7a  
Mat2a  
Prdx1  
Rpl22l1  
Rbms1  
Irf1  
Cybb  
Ahnak  
Mrfap1  
Atp5e  
Tmem256  
Ubb  
Snrpg  
Sh3glb1  
Mef2c  
H3f3a  
Eif3h  
Card19  
Nme2  
Hsp90ab1  
Eef1g  
Taldo1  
Ddx5  
Gnai2  
Cnbp  
Ppp1ca  
S100a10  
Atpif1  
Bsg  
Slfn2  
Anp32b

H2afz  
Serp1  
Aldoa  
Rpl31  
Cdk2ap2  
Zyx  
Ap2s1  
Gstp1  
Nfe2l2  
Tpm4  
Atp5d  
Adgre5  
Clec2d  
Atf4  
Eif3i  
Itm2c  
Sec61b  
Psmb3  
Ccnl1  
Ywhaz  
Ppp1r15a  
Rbpj  
Canx  
Rab14  
Hspa5  
Plekho2  
Ran  
Fis1  
Cyth4  
Rps25  
Psmb1  
Lamtor1  
Slc3a2  
Eif3e  
Eif3k  
Herpud1  
Serbp1  
Gnas  
Actr3  
Gltp  
Lsm4  
Tmed10  
Mif

Coro1b  
Fkbp2  
Pde4b  
Capg  
Akap13  
Psme2  
Fkbp1a  
Nol7  
Macf1  
Rbm39  
Cycs  
Hnrnpa1  
Ndufc2  
Snrpe  
Atp5b  
Atp5h  
Csrnp1  
Psmb9  
Hnrnpa3  
Gm8186  
Uqcrh  
Psm7  
Cd47  
Myl12a  
Snrpf  
Sec11c  
Syngr2  
Pgls  
Dad1  
Hspe1  
Tubb5  
Capzb  
Gm26917  
Abracl  
Rilpl2  
Rtraf  
Atp5c1  
Dock2  
Mrpl52  
Eef1d  
Kmt2e  
Hmgb2  
Tma7

Hnrnpf  
Krtcap2  
Arf6  
Fam49b  
Nap1l1  
Ndufb11  
Tomm20  
Itgb2  
Tax1bp1  
Atp5o.1  
Psm3  
Ptpn6  
Crip1  
Prr13  
Gstm1  
Ighm  
Rel  
Foxp1  
Cd79a  
Ebf1  
Ccr7  
Ly6d  
Cd79b  
Fcmr  
H2-DMb1  
Ighd  
Ms4a1  
Fcer2a  
Tyrobp  
Fcer1g  
Bank1  
Cst3  
H2-Eb1  
Igkc  
Lyz2  
Scd1  
Rps27  
Ahnak  
Ifitm3  
Cd37  
Dusp1  
Rps20  
Iglc3

Psap  
Gpx1  
Tmsb4x  
Tmem176b  
Crip1  
Iglc2  
Ccl6  
Nfkbiz  
Rps24  
Cd19  
Uba52  
Ctsb  
Stk17b  
Alox5ap  
Rpl8  
Ftl1  
Egr1  
Rpl18a  
H3f3a  
Mt1  
Lgals1  
Ifitm2  
Fos  
Hvcn1  
Fosb  
Rps19  
Selenop  
Tagln2  
Vim  
Cd55  
Itm2b  
Npc2  
Fau  
Marcksl1  
Rps15a  
Grn  
Csf1r  
C1qb  
Atf3  
Tmem176a  
Zfp36  
Gstm1  
C1qc

ApoE  
Rpl9-ps6  
Rpl13  
Ralgps2  
Fxyd5  
C1qa  
Ly6e  
H2afz  
Rpl19  
Nfkb1a  
Klf4  
Btg1  
Actg1  
Ier3  
Jun  
H2-Ab1  
Mrc1  
Cfp  
Pf4  
Marcks  
Cd74  
Rpl13a  
Pltp  
Ccl2  
F13a1  
Cd68  
Atox1  
Rps3a1  
Rpsa  
Anxa5  
Rps16  
Rgs10  
Cd14  
Mafk  
Wfdc17  
Ets1  
Mcl1  
Ctsc  
Mgl2  
Cxcl2  
Clec10a  
Zeb2  
Fyb

Ptp4a3  
Anxa2  
Mef2c  
Klf6  
Ablim1  
Ifi2712a  
Pim1  
Tgfb1  
App  
Fcgrt  
Ccl9  
Rps7  
Ptms  
Lgals3  
Tnfaip3  
Il1b  
Ctsd  
Efhd2  
Serp1  
Fcgr3  
Ckb  
Dab2  
Rps5  
Ms4a6c  
mt-Atp8  
Maf  
Folr2  
Hspa8  
Rpl6  
Shisa5  
Rps8  
Eef1a1  
Ccl7  
Myl6  
Zfp3612  
Lamp1  
Gnai2  
Emp3  
Rassf4  
Hexa  
Selplg  
Itgb1  
Zyx

Rps3  
Malat1  
Gimap6  
Cytip  
Socs3  
Rpl12  
Junb  
Ifngr1  
Ninj1  
Trib1  
Cbr2  
Pld4  
Ptprcap  
Rpl26  
H2-Q7  
Cdkn1a  
Cebpb  
Rps10  
Plbd1  
Jund  
Ltb  
Btg2  
S100a10  
Rpl27a  
Rpl34  
Aplp2  
Atp2b1  
Rrbp1  
Ehd4  
Sem1  
Tspo  
Itgb2  
Pde4b  
Gadd45b  
Akr1a1  
Neat1  
Rps26  
Swap70  
Rps4x  
Serf2  
Clta  
Coro1a  
Il2rg



Rpl7  
Rpl35  
Lgmn  
Vamp8  
Tln1  
Pold4  
Sat1  
Atp6v0c  
Gltf  
Rpl3  
Tsc22d3  
Gng5  
S100a13  
Fth1  
Man2b1  
Arpc1b  
Rac1  
Rps13  
Smdt1  
Arf5  
Kdm6b  
Rpl11  
Snx3  
Atpif1  
Cd52  
Kctd12  
Cyth4  
Vps37b  
Zfand5  
Gm2a  
Rps18  
Txnip  
Dbi  
Ctsa  
Cstb  
AW112010  
Sec61b  
Rpl36  
Napsa  
mt-Nd4l  
Pomp  
Fcgr2b  
Uqcr11

Spi1  
Rps27l  
Hmgn1  
Retnla  
Atp1a1  
Eef2  
Clic4  
Limd2  
Ifrd1  
Pitpna  
Rps21  
Ccn1  
Cox7c  
Sp140  
Rtn4  
Cd83  
Txn1  
Fkbp1a  
Rpl29  
Arhgdib  
mt-Nd5  
Tomm7  
Rbms1  
Rpl10a  
Rel  
Nrros  
Nfkbid  
Arpc2  
Cybb  
Plek  
Foxp1  
Fam107b  
Glud1  
Cox6a1  
Atp6v0b  
Dnaja1  
Ywhah  
Gnb2  
Uqcrc  
Msn  
Tpm3  
Rpl14  
Ucp2

Rps6  
Prdx1  
Ddx3x  
Anapc11  
Ostf1  
Cox5a  
Ptma  
Erp29  
Cltc  
H2-Ob  
H2afy  
Hsp90b1  
Eif3f  
Coro1b  
Rpl4  
Eif4a1  
Capzb  
Abracl  
Hint1  
Ptp4a2  
2010107E04Rik  
Ly6a  
Ppdpf  
Pdia3  
Tmem50a  
Calm1  
Rpl36a  
Cox6c  
Canx  
Gsta4  
Mat2a  
Ssr4  
Ezr  
Pou2f2  
Ier2  
Capns1  
Smim14  
Calm2  
Ctsz  
Rap1a  
Serinc3  
Arhgap45  
Capza2

Psme2  
Prdx5  
P4hb  
Sp100  
Sdcbp  
Rnaset2a  
Ptpn18  
Myl12b  
Ppp1r15a  
Adgre5  
Ptpn6  
S100a11  
Bri3  
Ier5  
Cd81  
Arhgef1  
Rbm39  
Ubc  
Dennd4a  
Cnbp  
Lsp1  
Apobec3  
S100a6  
Zfp36l1  
Rac2  
Kmt2e  
Macf1  
Rpl21  
Syk  
Polr2a  
Irf8  
Lyn  
Snx5  
Ncl  
Tax1bp1  
Ypel3  
Eef1g  
Gdi2  
Cd209a  
Tnip3  
Tnfsf9  
Cd209c  
H2-Q7

Plbd1  
Gm2a  
Il1b  
Olfm1  
Lsp1  
H2-Ab1  
Cd74  
H2-Aa  
Crip1  
Tmsb4x  
Ly6e  
Cbfa2t3  
Ckb  
Ccnd1  
H2-DMb2  
Etv3  
H2afy  
Bhlhe40  
H2-Aa  
Bcl2a1d  
Slamf9  
Avpi1  
Cst3  
Syngr2  
ApoE  
Napsa  
Nfkb1a  
Actg1  
Clec4b1  
Atox1  
Lgals3  
Gng10  
Lmo1  
Alcam  
H3f3b  
Slamf7  
Ifitm3  
Mgl2  
Fxyd5  
Traf1  
Alox5ap  
Vim  
Ltb4r1

Zyx  
Psap  
S100a4  
Ccr2  
Ptms  
Gpx1  
Ear2  
Gsn  
Ccnc88a  
C1qc  
Pim1  
Rplp0  
S100a6  
Gpr132  
C1qb  
Cdkn1a  
Itm2b  
Rpl28  
C1qa  
Rps11  
mt-Cytb  
Wfdc17  
Anxa2  
Csrnp1  
Pf4  
Clic4  
Icam1  
Bri3bp  
Hfe  
F13a1  
Nr4a1  
Gadd45b  
Rps4x  
Selenop  
mt-Atp8  
Actb  
mt-Co3  
Efhd2  
Ifitm6  
Nr4a2  
Fgfr1  
Pid1  
Myo1g

Cbr2  
H2afz  
Folr2  
Pde4b  
Cd81  
Fau  
Mafb  
Tmsb10  
Ifitm2  
Nfkbid  
mt-Co1  
Pmaip1  
Cd79a  
Klf2  
Rassf4  
Maf  
Ramp1  
Mt2  
Tep1  
Srgn  
Ubb  
Rps27a  
Myadm  
Csf1r  
Dennd4a  
Nr4a3  
Ms4a6c  
Ccnd2  
Tyrobp  
H2-Ab1  
Tnfaip3  
Gm10076  
S100a10  
Ahnak  
Nrros  
Tkt  
mt-Nd4l  
Ywhah  
Rps27l  
Serinc3  
Sh3bgrl3  
Mpeg1  
Ctsd

Sec61b  
Cxcl2  
Wdfy4  
Gstm1  
Nfkb1  
Clec10a  
Cebpb  
Ninj1  
Dusp2  
Ppp1r15a  
Flna  
Itgb7  
Cd52  
Arpc1b  
H2-DMb1  
Ctsb  
B2m  
Erp29  
Ubl3  
Cd44  
Serf2  
Rpl39  
Pitpna  
Rasgef1b  
Kdm6b  
Myl6  
Rps28  
Lgmn  
Ctss  
Ly6d  
Txnip  
S100a11  
Nfam1  
Cd37  
Mt1  
Rpl35a  
Ighm  
Fosl2  
Tmem176a  
Csf2ra  
Smdt1  
Uqcc2  
Cytip



Rack1  
Socs3  
Ssr4  
Trib1  
Ndufa6  
Twf2  
Irf5  
Ptprcap  
Ccl9  
Dock10  
Mcl1  
Rel  
Arpc2  
Ikbkb  
Prcp  
Ctsh  
Elmsan1  
Pip4k2a  
Cd9  
Eps8  
Snx20  
Rala  
Bcl2a1b  
Spi1  
Rbpj  
Ptpre  
Tagln2  
Lamp1  
H13  
Rpl23a  
Sh3bgrl  
Marcks  
Dusp5  
Stx7  
AW112010  
Plec  
Cotl1  
Fnbp1  
Fmn1  
Iqgap1  
Plek  
Sub1  
Ccnd3

Eif3k  
Il10ra  
mt-Nd1  
Plp2  
9-Sep  
Sdf2l1  
Arf5  
Taok3  
Fbl  
mt-Atp6  
Ptpn18  
mt-Nd2  
mt-Nd5  
Plekho2  
Fyb  
Picalm  
Lbh  
Higd2a  
Pdia6  
Grn  
Ccl2  
Ctsc  
Cltc  
Shisa5  
Calm2  
Klf6  
Rgs10  
Pnrc1  
mt-Nd4  
Vps37b  
Sat1  
Gstp1  
Jak1  
Jun  
Malat1  
Ubc  
H2-Q7  
Ddx5  
Ypel3  
Lyz2  
Cstb  
Mrc1  
Neat1

Clta  
Snx5  
Pltp  
Atp2b1  
Hmgb2  
Sqstm1  
Ftl1  
Laptm4a  
Arl6ip1  
Map1lc3b  
Rac2  
Klf4  
AY036118  
Atp6v0c  
Cdk2ap2  
Rnaset2a  
Ccl6  
Ehd4  
Rap1b  
Anp32a  
Cd14  
Bri3  
Prdx1  
Retnla  
Fcna  
Folr2  
Ednrb  
Cd209f  
F13a1  
Selenop  
Lyve1  
Pf4  
C4b  
Egr1  
Mafb  
Clec10a  
Ccl24  
ApoE  
C1qc  
Cd36  
Tmsb10  
Maf  
Gas6

C1qb  
Pltp  
Cd52  
Ctsb  
Klf4  
Fcgrt  
Mrc1  
Ltc4s  
Ftl1  
Ccl6  
Timp2  
Jun  
C1qa  
Fth1  
Cbr2  
Csf1r  
Cd209g  
Fos  
Igfbp4  
Rplp0  
Rpsa  
Mt1  
Cfh  
Rpl13  
Ctsc  
Ninj1  
Fxyd2  
Cd209d  
Dab2  
Dusp1  
Jund  
Mmp9  
Itm2b  
Wwp1  
Zfp36  
Cd209b  
Glul  
Cd163  
Rpl8  
Junb  
Tgfb1  
Coro1a  
Rpl19

Grn  
Lgmn  
Rps7  
Marcks1  
Hmox1  
Eef1a1  
Uba52  
Serinc3  
Rpl18  
Igf1  
Rpl32  
Rhob  
Klf6  
Rps24  
Rps5  
Ier2  
Atf3  
Fosb  
Rps16  
Lyz2  
Rpl18a  
Tns1  
Malat1  
Rps3  
Ifi2712a  
Ccl7  
Rps15a  
C5ar1  
Rps19  
Cst3  
Wfdc17  
Ifitm3  
Nfkbiz  
Ctsd  
Lsp1  
Rpl14  
Ptafr  
Rps10  
Ier3  
Rpl29  
Btg1  
mt-Co1  
Stab1

Srgn  
Rpl9-ps6  
Rps3a1  
Stard8  
Itsn1  
Mcl1  
Cytip  
Pfn1  
Marcks  
Rps29  
Lifr  
Rpl3  
Rnase4  
Hexa  
Fxyd5  
Rps2  
Neat1  
Ccl2  
Eef2  
Serpib6a  
Ctsl  
Rpl13a  
Lamp1  
S100a11  
Dhrs3  
Ccl8  
Rpl15  
Fgfr1  
Ppia  
Gapdh  
Nrp1  
Pmp22  
Mgl2  
Rps13  
Cd63  
Rpl10a  
Limd2  
Rps18  
Clta  
Napsa  
Rpl27  
Il2rg  
Msn

Pde4b  
Aplp2  
Rps4x  
Myh9  
Rpl6  
Lrp6  
Psmb8  
Rgl1  
Shisa5  
Rpl11  
Ptprcap  
Blvrb  
H2-Eb1  
H2-DMb2  
Mtss1  
Kctd12  
Rac2  
Myl12b  
Ccl9  
Rpl26  
Cd79a  
Trf  
Fau  
Rpl12  
Rpl4  
Ap2a2  
Ifi207  
Rpl39  
Ehd4  
Cnn2  
Ptprc  
Rpl28  
H3f3a  
Cd74  
Rps6  
Sub1  
Eif3f  
Eif5a  
Rps26  
H2-Aa  
Rps20  
Rps11  
Rps27

Il1b  
Zeb2  
Mat2a  
Hacd4  
H2-DMa  
Rpl34  
Clic1  
Ly6d  
Sh3bgrl3  
Dennd4a  
Ptma  
C3ar1  
Ezr  
Psme1  
Mt2  
Fcer1g  
Bri3  
Pepd  
Lamp2  
Ubc  
Rpl27a  
Rplp2  
H2-K1  
H2-DMa  
Rpl24  
Vps37b  
Rbm3  
Eef1b2  
Klf2  
Actb  
Cebpd  
S100a6  
Plbd1  
Psme2  
H2-DMb1  
AW112010  
Rack1  
Cnbp  
Rpl7a  
Eno1  
Btg2  
mt-Nd4  
Fcgr3



Atp5d  
Btf3  
Rpl36a  
Rps27a  
Cyba  
Anxa2  
mt-Nd4l  
Rel  
Rpl36  
Lgals3  
Cltc  
Flna  
Tyrobp  
Cd81  
Cfp  
Unc93b1  
Adgre1  
Stk17b  
Adgre5  
Gpx1  
Arhgdib  
Ctsh  
Gm2a  
Edf1  
Eif3k  
Cd37  
Psmb1  
Rpl5  
Npm1  
Syngr2  
Zfp36l2  
Aldoa  
Rpl22  
Eps15  
Arf6  
BC005537  
Tcf4  
Psmb3  
Naca  
Eps8  
Clic4  
Zfp36l1  
Macf1

Npc2  
Cebpb  
H2afz  
Sem1  
H2-Ab1  
Eif3i  
Rbpj  
Rpl35  
Eif3h  
Ppp1ca  
Psmb9  
Dad1  
Snrpe  
Atp5b  
Mif  
Rpl10-ps3  
Fcrls  
Snx5  
Ldha  
Ifngr1  
Tpm4  
Actr3  
Ywhaz  
Gnai2  
Preli1  
App  
Erh  
Arhgap45  
Taldo1  
Anxa5  
Pkm  
Lcp1  
Capg  
Cxcl2  
Atp5c1  
H2afy  
Rbm39  
Ptpn6  
Mrpl52  
Anp32b  
Hmgb2  
Tmsb4x  
Sumo2

Ssr4  
Ahnak  
Cyca  
Xist  
Snx2  
mt-Atp8  
H2-Q7  
Nme2  
Hnrnpa1  
Snrpg  
Atox1  
Ran  
S100a10  
AY036118  
Selplg  
Tnfaip3  
Nsa2  
Rpl7  
Asah1  
Hnrnpf  
Serbp1  
Pabpc1  
Arpc4  
Hmgb1  
Fcgr2b  
Eif3e  
Ppp1r18  
Atp2b1  
Hnrnpu  
Sri  
Tmem176b  
Arpc3  
Atp6v0b  
Atp5o.1  
Ncl  
Zfand5  
Fam49b  
Creg1  
Ifitm2  
Hnrnpa2b1  
Rpl21  
Hspe1  
Rpl36al

Alox5ap  
Ywhah  
Sf3b1  
Nol7  
Rgs10  
Rpl17  
Myl12a  
Ndufa13  
Atp5a1  
Nop10  
Atp5h  
Abracl  
Cox5b  
Tax1bp1  
Ccn1  
Snrpf  
Rrbp1  
Atf4  
Rnf130  
Cotl1  
Nrros  
Lsm4  
Arpc2  
Sap18  
Rpl22l1  
Itgb2  
Lyn  
Gnas  
Srrm1  
Socs3  
Rpl10  
Grcc10  
Ddx3x  
Cd68  
Atp5e  
Zcchc6  
Fis1  
mt-Nd2  
Zyx  
Slc6a6  
Park7  
Sat1  
Mycbp2

Prr13  
Ctsa  
Dock2  
Scamp2  
Calm2  
Ralbp1  
Tgfbr2  
Aldh2  
Akr1a1  
Tubb5  
Pld4  
Ap2m1  
Prdx5  
Gng5  
Vim  
Cdk2ap2  
Man2b1  
Snx3  
Rap1b  
Lmna  
Vamp8  
Pitpna  
Emp3  
Txnip  
Bst2  
Gabarap  
Sdcbp  
Ier5  
Ppp1r15a  
Fkbp1a  
Canx  
Srsf5  
Rbms1  
Atpif1  
Ptp4a2  
Kdm6b  
Tmed10  
Rtn4  
Wnk1  
Ms4a4b  
Cd3d  
Cd8b1  
Cd3e

Lat  
Cd3g  
Gzmk  
Nkg7  
Lck  
Thy1  
Cd27  
Ccl5  
Vps37b  
Skap1  
Cd247  
Cd28  
Cd74  
Tyrobp  
Cst3  
H2-Q4  
Trbc2  
Rps15a  
H2-Q4  
Fcer1g  
Hcst  
H2-DMb1  
Eef1a1  
Gpx1  
Rpsa  
Fth1  
Lyz2  
Rps16  
Zfp36  
Ftl1  
Ifitm3  
Rpl12  
Gimap3  
Rpl19  
Tmsb10  
Psap  
Rps24  
Gimap6  
Itk  
Uba52  
Rpl13a  
Rps7  
Rpl18a

Ctsw  
Saraf  
Rpl18  
Ets1  
Shisa5  
Gimap4  
Fos  
H2-DMa  
Rps3  
H2-Q6  
AW112010  
Cd2  
Rps10  
Rpl8  
Marcksl1  
Ccl6  
Tmem176b  
ApoE  
1-Sep  
Alox5ap  
Rplp0  
Mt1  
Rpl9-ps6  
Fosb  
Rpl13  
Ifitm2  
Egr1  
Rps27  
Rps5  
Prkch  
Limd2  
Emb  
Grn  
Unc93b1  
Ablim1  
Nfkbiz  
Rps3a1  
Csf1r  
Rpl3  
Il7r  
C1qb  
Tmsb4x  
Cd83

C1qc  
Selenop  
Rps18  
Rpl27  
Rpl32  
C1qa  
Wfdc17  
Klf4  
Atf3  
Pltp  
Mrc1  
Ctss  
Ms4a6b  
Kctd12  
Cfp  
Dusp1  
Rps2  
Pf4  
Marcks  
Eef2  
Ltb  
Ctsh  
Ctsb  
Rpl30  
Pld4  
F13a1  
Ptprcap  
Ccl2  
Ccr7  
Rpl36  
Jun  
H2-Q6  
Ctsc  
Rps23  
Jund  
Rplp2  
Tmem176a  
Cybb  
H2-Ob  
Mcl1  
Leprot1  
Cd14  
Rac2



H2-Q4  
Rpl23  
Rps13  
Spi1  
Clec10a  
Rps4x  
Mafb  
Rps20  
Cd68  
Zeb2  
Rpl11  
Ly86  
Rplp1  
Il21r  
Lgmn  
Tgfb1  
Cxcl2  
Rps19  
Rpl27a  
Ctsz  
Rassf4  
Rpl6  
Fcgrt  
Fcgr2b  
B4galnt1  
Mgl2  
Plbd1  
Tpt1  
Hexa  
Ccl9  
Nfkb1a  
Rpl15  
App  
Il2rg  
Bri3  
Rps21  
Rps6  
Rps8  
Il1b  
Nrros  
Rpl10a  
Rps14  
Crip1

Lgals3  
Ckb  
Nr4a1  
Rpl29  
Chd3  
Rpl39  
Plek  
Btg1  
Pim1  
Clic4  
Cbr2  
Serinc3  
Rack1  
Cd81  
Rpl34  
Anxa5  
Rpl14  
Pnrc1  
Ehd4  
Ier3  
Ninj1  
Lamp1  
Rrbp1  
Ptprc  
Rpl5  
Atox1  
Vim  
Cnn2  
H2-Aa  
Atp6v0b  
Cyba  
Jak1  
Ahnak  
Kdm6b  
Lyn  
Itm2b  
Myl12b  
Btg2  
Rpl37  
Gm2a  
Zc3hav1  
Rpl22l1  
Sat1

Neat1  
Rps26  
Selplg  
Rpl7  
Rpl4  
Myh9  
Ly6e  
Coro1a  
Prdx6  
Napsa  
Rpl24  
Rpl36a  
Npm1  
Tnfaip3  
Atpif1  
Eef1b2  
Sem1  
Zfand5  
Erp29  
Arhgap45  
Bin2  
Retnla  
Gabarap  
Litaf  
Ier5  
H2-K1  
Eif3f  
Fam107b  
Fyb  
Cltc  
Dusp5  
Gstm1  
Cebpb  
Rpl21  
Gadd45b  
Naca  
Pabpc1  
Ptms  
Zfp36l1  
Sh3bgrl3  
Cd82  
Gnai2  
Efhd2

Akap13  
Gapdh  
Mif  
Cnbp  
Man2b1  
Nfkbid  
Stk4  
Atp2b1  
Itga4  
Arhgdib  
Akr1a1  
Clta  
Stk17b  
Snx5  
Stat1  
Vamp8  
Rps27l  
Capza2  
Ctsa  
Arl6ip5  
Rps15  
Ubald2  
Arhgef1  
Smdt1  
Btf3  
Mef2c  
Klf6  
Syng2  
Rel  
Rtn4  
Tagln2  
Snx3  
Polr2a  
Pde4b  
Ifi27l2a  
Rpl17  
Dad1  
Birc6  
Sdcbp  
Serp1  
H3f3a  
Elf1  
Canx

Mbnl1  
Psmb8  
Gng5  
Rbm39  
Tmed10  
Nr4a2  
Serf2  
Tgfb1  
Prkar1a  
Odc1  
Fxyd5  
Capg  
Hsp90b1  
Ier2  
Rpl9  
Cdk2ap2  
Atp6v1g1  
Cstb  
Ppp1r18  
Cirbp  
Eif3h  
Anxa6  
Ppp1r12a  
Eif3e  
Ccnl1  
Nsa2  
Rpl10  
Gstp1  
Prdx5  
Atp6v0c  
Arpc1b  
Ezr  
Psme2  
Psme1  
Dbi  
Sp100  
Ighm  
Ube2i  
Psmb3  
Rgs10  
Ncl  
Atp1b3  
Ldha

Aldoa  
Arl6ip1  
Gpr132  
H2-K1  
Ptpn6  
Itgb7  
Eif5  
Eef1d  
Vps28  
Npc2  
Itgb2  
Socs3  
Lgals1  
Nop53  
Ndfip1  
Sri  
Serbp1  
Ypel3  
Gsta4  
Laptm4a  
Rbms1  
Ctsd  
Psmb1  
Prrc2c  
Ppp1cc  
Apbb1ip  
Ddx3x  
Park7  
Nap1l1  
Cct2  
Sqstm1  
Tuba1b  
Ptp4a2  
Anxa2  
Igkv1-117  
Akr1b3  
Dnaja1  
Lsp1  
Klf2  
Cd79a  
Chil3  
Thbs1  
Plac8

Gngt2  
Msrb1  
Hp  
Ly6c2  
Lyz2  
Ace  
Ifitm3  
Gsr  
Lst1  
Il1b  
Cebpb  
Ifitm6  
Sirpb1c  
Ms4a6c  
Pglyrp1  
Prdx5  
Cd300a  
Plaur  
Gm9733  
Lgals3  
Fgr  
Cybb  
Ifitm2  
Cd300c2  
Clec4a3  
Alox5ap  
Fyb  
Cdk2ap2  
Fn1  
Tyrobp  
Slc16a3  
Nfil3  
Taldo1  
Lrp1  
Emilin2  
Ceacam1  
Gpx1  
Smpdl3a  
Fcer1g  
Spi1  
Cd44  
Sat1  
Psap

Adgre5  
Rnf149  
Ncf2  
Ctss  
Ms4a4c  
Hck  
Irf7  
Sgk1  
Ifi2712a  
Cx3cr1  
Cdkn1a  
Mgst1  
Plbd1  
Tpd52  
Samhd1  
Prkcd  
Ccr2  
Tnfrsf1b  
Itgal  
Ms4a4a  
Stk10  
Flna  
Fxyd5  
Nfam1  
Mpeg1  
Cyp4f18  
Tkt  
Gm36161  
Anxa2  
Itga4  
Clec4a1  
Cyba  
Tnfrsf1a  
Pou2f2  
Ptpre  
Ear2  
Gm21188  
Rap1a  
Nadk  
Tnfsf13  
Irf5  
Pla2g7  
Apbb1ip



Coro1a  
S100a4  
Pirb  
Agpat4  
Itgb2  
Rasgrp2  
Ccl6  
Lyn  
Mrpl33  
Myo1g  
Arpc1b  
Ifngr1  
AB124611  
Metrnl  
Nfe2l2  
Ptpn1  
Plin2  
Bin2  
Csf2ra  
Rap1b  
Anxa1  
Srgn  
Tln1  
Eno1  
Tgfb1  
Fmn1  
Calm1  
Degs1  
Gda  
Msn  
Rhog  
Pld4  
Pkm  
Cytip  
Ucp2  
H3f3a  
Psm7  
Prr13  
Klf13  
Slfn5  
Emp3  
Glud1  
Aprt

Lsp1  
Tgfb1  
Vim  
Il10ra  
Fam49b  
Napsa  
Ptpn6  
Lrrc25  
Lrrfip1  
Gm2a  
Coro1b  
Myo1f  
Adipor1  
Cd14  
Sem1  
Atp1a1  
Capza2  
Klf3  
S100a6  
1110008F13Rik  
Ccdc12  
Gpcpd1  
Tmem14c  
Clec12a  
Atp6v1b2  
Cd68  
Sema4d  
Csf2rb  
Atox1  
Npc2  
Rac1  
Ms4a6b  
Ostf1  
Rhoa  
Fam105a  
Ccnd3  
Ctsa  
Snx20  
Rassf4  
Arpc2  
Sirpa  
Ptprc  
Ccl9

Ctsz  
Aup1  
Atp6v1e1  
Fam96a  
Dbi  
Gstp1  
Actg1  
Zeb2  
Iscu  
Il6ra  
Creg1  
Mtpn  
Dusp5  
Lamtor4  
Cmpk1  
Zyx  
Ncf4  
Rnh1  
Ppp1ca  
Capzb  
Trim25  
Lamp1  
Iqgap1  
Arpc3  
Ly86  
Nr4a1  
Lptm4a  
Fis1  
Myl12b  
Pomp  
Cmtm7  
Ikkbb  
H2afj  
Atp6v0c  
Add3  
Esd  
Gnb2  
Fosl2  
Mia2  
Fermt3  
Scand1  
Anxa5  
Actr3

Slc25a5  
Arhgap9  
Arpc4  
Gpr132  
Laptm5  
Pim1  
Dynll1  
Hcls1  
Diaph1  
Snrpb  
Pgam1  
Cycs  
Vsir  
Ywhab  
Tmed5  
Cdc42  
Pid1  
Atp1b3  
B2m  
Zbtb7a  
Xbp1  
Asap1  
Gapdh  
H2-Eb1  
Prdx1  
Uqcrrs1  
Aldh2  
Arl6ip5  
Emb  
Mpc2  
Vamp8  
Tmsb10  
Plec  
Ssh2  
Atp5c1  
Fcgr3  
Btg1  
Nrros  
Clic1  
Efhd2  
Atp6v0d1  
Cap1  
Aif1

Psmb5  
Ly6e  
Chmp2a  
Capns1  
Pycard  
Trib1  
Syk  
Bax  
Cotl1  
D8Ertd738e  
Arhgap30  
H13  
Fam174a  
Ndufa11  
Ywhaz  
Sec61g  
Litaf  
Slfn2  
Hspa8  
Ifnar2  
Apc5  
Tspo  
Atp2b1  
Pde4b  
S100a11  
Atp5l  
H2afz  
Abracl  
Erp29  
Csf1r  
Grk2  
Reep5  
Gnai2  
Eif3k  
Ndufc2  
Was  
Rbms1  
Atp6v0b  
Arf5  
Serf2  
Dazap2  
Stk24  
Ypel3

Psmb2  
Txn1  
Psm2  
Cope  
Tspan13  
Mob1a  
Tmbim6  
Prdx2  
Atp5f1  
H2-K1  
Cnbp  
Rps4x  
Rpl32  
Cd74  
Hnrnpa1  
Rpsa  
Tbca  
Rpl36  
Clic4  
Nol7  
Hmgb1  
Rps2  
Rps6  
Jak1  
H2-T22  
Mif  
mt-Co2  
Mbnl1  
AY036118  
Rpl22l1  
Rpl30  
Gm8186  
S100a10  
Rps18  
Pnrc1  
Rps27  
Rpl39  
Rps29  
Ncl  
mt-Atp6  
Npm1  
Rpl14  
mt-Nd4

Eef1d  
Klf2  
H2-K1  
Junb  
Rps24  
Rps12  
Cltc  
Ctsd  
Wnk1  
Rps15a  
Atpif1  
Ppp1r15a  
Foxp1  
Serinc3  
mt-Nd3  
mt-Co3  
mt-Nd4l  
Socs3  
Snx5  
Rps21  
Rpl13a  
Eef1g  
Il2rg  
Ndfip1  
mt-Co1  
mt-Atp8  
Ier2  
Cxcl2  
Xist  
Rpl36a  
Rps20  
mt-Nd1  
Ptms  
mt-Cytb  
mt-Nd2  
Atf3  
mt-Nd5  
Kctd12  
Lgals1  
Cfp  
ApoE  
Cd83  
Tuba1b

Gadd45b  
Pltp  
Zfp3611  
Rplp1  
Tubb5  
Rpl12  
H2-Oa  
Tnfaip3  
Cd37  
Fcgrt  
Txnip  
Nfkbiz  
AW112010  
Clec10a  
Klf6  
Jund  
Fosb  
Ly6d  
Cd81  
H2-Q6  
Mgl2  
Marcksl1  
Ptprcap  
Mrc1  
Ighm  
Selenop  
Jun  
Cbr2  
Ccl2  
C1qb  
Egr1  
C1qa  
Mt1  
Cd79a  
C1qc  
Pf4  
Retnla  
AC133103.1  
Ighv1-52  
Mzb1  
Fcr15  
C130026I21Rik  
Ms4a1



Cd79a  
Igkv1-117  
Iglc2  
Cd79b  
Fcmr  
Iglc3  
Plac8  
Ighm  
Myo1e  
A530040E14Rik  
Nfatc1  
Ly6a  
Ly6d  
Camk2d  
Blk  
Spib  
Sp140  
Cd19  
Cd24a  
Iglc1  
Ebf1  
Napsa  
Tyrobp  
Fam43a  
Odc1  
Fcer1g  
Cst3  
Cd37  
Cxcr5  
H2-Q7  
Zbtb20  
Bank1  
Lyz2  
Vars  
Snn  
Dok3  
Ifitm3  
Dnajc7  
Gm15987  
Igkc  
Fth1  
Ctla4  
Zfp36

Ero1lb  
Uchl3  
Ftl1  
Ltb  
Fos  
Tmem176b  
Rpl13  
Ccl6  
Alox5ap  
Cd72  
Sh3bp5  
Txnip  
Dusp1  
Ptprcap  
Rpsa  
Mt1  
Ifitm2  
mt-Cytb  
Itm2b  
Siglecg  
Tmsb4x  
Selenop  
Nfkbiz  
Rps18  
Ezr  
mt-Co3  
Gimap5  
Rac2  
Ctsb  
Tnfrsf13b  
Rps19  
C1qb  
Swap70  
Csf1r  
Pdia4  
Gpx1  
mt-Nd4l  
Egr1  
Rpl8  
Gimap4  
Junb  
Rpl3  
mt-Atp8

Ikzf3  
Rps20  
Cd52  
H2-Q7  
C1qc  
Rps2  
Pltp  
Pold4  
Rps3a1  
Wfdc17  
Ier3  
Nfkbia  
Rpl9-ps6  
Rps8  
Tmem176a  
Pf4  
Klf4  
Mdh1  
C1qa  
Mrc1  
Cnp  
Atp2a3  
Pkig  
Rpl12  
mt-Nd5  
Hvcn1  
Pou2f2  
F13a1  
Fosb  
Ccl2  
Rps15a  
Eef1a1  
Hist1h1e  
Tsc22d3  
Rps7  
Gpcpd1  
Capg  
Npc2  
Tagln2  
Man1a  
Rps5  
Rpl32  
Fcgrt

Rilpl2  
Cd14  
Mafb  
Aldoa  
Ifngr1  
Rps27  
Vgll4  
Rpl14  
Ctsd  
Cxcl2  
Tcf4  
Rgs10  
Clec10a  
Rpl27a  
Rps13  
Hsp90ab1  
Cd68  
Laptm5  
Cybb  
Mgl2  
Grn  
Rplp0  
Rpl19  
Ptpn6  
Rps9  
Rps26  
Rpl10a  
Ier2  
Psap  
Lamp1  
Macf1  
Fyb  
Rpl18a  
Zfp36l2  
Plp2  
Rpl29  
Foxp1  
Cd2  
Blnk  
Rpl30  
Rps11  
Zyx  
Ly6e

Lyn  
Gadd45b  
Socs3  
Crip1  
Gimap1  
Lgals1  
Rpl18  
Atox1  
Rpl35  
Il1b  
Rps3  
Rpl36  
Cd83  
Lgals3  
Vim  
Btg2  
Lgmn  
Gimap6  
Efhd2  
Ninj1  
Arf6  
Hexa  
Zeb2  
Rpl13a  
Ahnak  
App  
Rpl26  
Rps12  
Npm1  
Rpl11  
Rpl36a  
Syk  
H2-T23  
Ifi2712a  
Fxyd5  
Malat1  
Anxa5  
Cbr2  
Mif4gd  
Emp3  
Jun  
Anxa2  
Marcks

Ctsa  
Stk17b  
Rpl39  
Rpl6  
Eef2  
Tnfaip3  
Rab4b  
Aldh2  
Eef1g  
Kmt2e  
Serf2  
Gm26917  
Ppdpf  
Prkcb  
Klf6  
Serp1  
Ehd4  
Myl6  
Mcl1  
Atf3  
Ncf1  
Cfp  
Arhgdib  
Rpl22  
Srsf11  
Gimap3  
Sub1  
Ncf4  
H2afz  
Rrbp1  
Rel  
Gstm1  
Hspa4  
Rpl4  
Rps6  
Tgif1  
Smim14  
Sem1  
Selplg  
B2m  
Eef1d  
1-Sep  
Coro1a

Bri3  
Uvrag  
Nrros  
Hmgn1  
Marcks11  
H2afy  
Rpl5  
H2-D1  
Ehd1  
Tspo  
Naca  
Rpl21  
Zfp706  
Ptms  
Ctsc  
Wdfy4  
Eif3i  
Csk  
Tmod3  
Gnai2  
Gdi2  
Eif3f  
Zfand5  
Ly86  
Gmfg  
Atp6v0b  
Rbm3  
Atpif1  
Gns  
Kdm6b  
Ppm1g  
Ctss  
Neat1  
Gng5  
H2-T22  
Ptpn1  
Tmem123  
Cebpb  
Kctd12  
Msn  
Nol7  
S100a6  
Rhog

Itgb2  
Serbp1  
Hnrnpa1  
Gm2a  
Spi1  
Akr1a1  
AY036118  
Sat1  
Snx3  
Add3  
Clta  
Apobec3  
Luc7l2  
Nop10  
Prpf8  
Thrap3  
Ccnl1  
Rnaset2a  
Vamp8  
Dbi  
Tubb4b  
Nap1l1  
Arf5  
Gltp  
Ppp1r15a  
Hnrnpa2b1  
Eif4a2  
Atp5b  
Rpl17  
Gsta4  
Eif5a  
Sp100  
Zfp106  
Eif4b  
Rtn4  
Man2b1  
Atp6v0c  
Ncl  
Nme2  
Tnfaip8  
Cstb  
Rac1  
Psmb9



Prrc2c  
Selenok  
Reep5  
Calr  
Vdac2  
Ier5  
Psme1  
Sdcbp  
Ccnd2  
Tcp1  
Rap1b  
Pomp  
Eif3e  
Tomm20  
Prdx5  
Inpp5d  
Cnbp  
Hspe1  
Dbnl  
Ddx6  
Polr2a  
Cdc42se2  
Mif  
Smdt1  
Ybx1  
Atp2b1  
Sec61b  
Tmsb10  
Ppp1r18  
Arpc1b  
Lsm4  
Syng2  
Ubc  
Rbms1  
Ptges3  
Ubl3  
Cyfip1  
Atp5j2  
Tmed10  
Jund  
Dnaja1  
Tmem50a  
Sf1

Calm3  
Fkbp1a  
Ctsh  
Snx5  
Gpi1  
Serinc3  
S100a10  
Flna  
Cd53  
Ran  
Wnk1  
Fcgr2b  
Selenof  
Gzma  
Gzmb  
Nkg7  
Ccl5  
AW112010  
Il2rb  
Prf1  
Klrb1c  
Ncr1  
Ctsw  
Klre1  
Serpib9  
Klrk1  
Xcl1  
Serpib6b  
Cd7  
Fasl  
Sh2d2a  
Txk  
Cd74  
Ms4a4b  
Klrd1  
Cst7  
H2-Oa  
H2-K1  
H2-Ab1  
Tmsb10  
Irf8  
Pfn1  
Gimap4

Lgals1

Ugcg

Fth1

Cst3

Arsb

Lck

Skap1

Ptprcap

Vps37b

Hcst

1-Sep

Ftl1

Psap

Ptprc

Gpx1

Pik3r1

Lyz2

Ccl4

Zfp36

Itgal

Ifitm3

Tyrobp

Cd83

Fcer1g

Ifngr1

Ctss

H2-Q6

Bcl2

Atf3

Anxa2

Fos

ApoE

Gimap5

Fosb

Unc93b1

Ccl6

H2-D1

Nfkb1a

Marcksl1

Egr1

Cd52

Mt1

Alox5ap

Selplg  
D16Ertd472e  
Ifitm2  
Ccnd2  
Ifi2712a  
Itgb2  
Spn  
Jun  
H2-D1  
Ctsh  
Pglyrp1  
Nfkbiz  
Rac2  
Ctsb  
Dusp5  
Id2  
C1qb  
Dusp1  
Tmem176b  
Wfdc17  
Pltp  
Grn  
Cybb  
Csf1r  
Ccnd3  
Gimap3  
Pld4  
Ly86  
Selenop  
H2-DMb2  
C1qa  
C1qc  
Marcks  
Mrc1  
Myl6  
Ctsc  
Cfp  
Klf4  
Mcl1  
Spi1  
Jak1  
Junb  
Ier3

Pf4  
Ctsz  
Ly6e  
H2afz  
Ccl2  
Rinl  
Klf6  
Zfp36l1  
F13a1  
Cd68  
S100a10  
Gm2a  
Lgmn  
App  
Fcgrt  
Zfp36l2  
Cd81  
Clec10a  
Cd14  
B4galnt1  
Thy1  
Nr4a1  
Rgs10  
Cxcl2  
Mafb  
Npc2  
Tmem176a  
Kctd12  
Anxa5  
Mgl2  
Rassf4  
Lamp1  
Fcgr2b  
Cfl1  
Jund  
Ppia  
Il1b  
Ywhaq  
Plbd1  
Erp29  
Cd79a  
Cbr2  
H2-Eb1

Cnn2  
Rel  
Esys1  
H2-Q6  
Nrros  
Actb  
Anxa6  
Myl12a  
Ets1  
Hexa  
Ighm  
Fxyd5  
Lgals3  
Pim1  
Leprot1  
Gadd45b  
Ninj1  
Cox8a  
Gimap6  
Mef2c  
Zyx  
Efhd2  
Tpm4  
Itm2b  
Vasp  
Shisa5  
Clic4  
Cd2  
Pde4b  
Ldha  
Ppp1r15a  
Serp1  
Nfkbid  
Atp6v0c  
Napsa  
Sh3bgrl3  
Ptpn18  
Prex1  
Dad1  
Ablim1  
Fgl2  
Adgre5  
Sat1

Bri3  
Gabarap  
Rpl27  
Klf2  
Eif5a  
Rpl13a  
Atp6v0b  
Cltc  
Ctsa  
Serf2  
Ndufb7  
Dnajc15  
Kdm6b  
Ier5  
Zeb2  
Bin2  
Scand1  
Socs3  
Capg  
Ppp1r12a  
Hmgb2  
B2m  
Arhgdib  
Rnaset2b  
Syngr2  
Zfand5  
Slc9a3r1  
Rpl22l1  
Il2rg  
Gnas  
Itgb1  
Ehd4  
Cyca  
Atp5g3  
S100a6  
S100a13  
Ly6d  
Ndufa4  
Reep5  
Clta  
Itga4  
Elob  
H3f3a

Atpif1  
Neat1  
Serbp1  
Epsti1  
Atp5h  
Ier2  
Dok2  
Ppp1r18  
Arpc2  
Gltf  
Polr2l  
Btg2  
Prr13  
Man2b1  
Cox5b  
Pabpc1  
Arhgef1  
Krtcap2  
Eno1  
Samhd1  
Rtn4  
S100a11  
Capzb  
Tma7  
Atox1  
Atp5j2  
Snrpg  
Atp5e  
Cstb  
Capza1  
Abracl  
Cd47  
Ctsd  
Ccnl1  
Ubc  
Cebpb  
Sub1  
Gdi2  
Sptbn1  
Bhlhe40  
Arhgap45  
Dock2  
Ccr2



Dennd4a  
Atp2b1  
Rps19  
Prkar1a  
Oaz1  
Mbnl1  
Atp5d  
Nr4a2  
Crip1  
Sumo2  
Lsp1  
Cap1  
H2-DMb1  
Neur13  
Vamp8  
Ddx5  
Ran  
Tspo  
Serinc3  
Ppp1ca  
Ubal2  
Edf1  
Nap111  
Plekhj1  
Ankrd44  
Ube2i  
Laptm4a  
Ddx3x  
Ncl  
Cox7a2l  
Akr1a1  
Diaph1  
Pycard  
Rbm3  
Psme1  
Tln1  
Rrbp1  
Ywhab  
Preli1  
Myh9  
Psmb10  
H2-Oa  
Rbx1

Hmgb1  
Txn1  
Sap18  
Gstm1  
Tmem258  
Wnk1  
Clic1  
Tmed10  
Ndufa13  
Tuba1b  
Snx5  
Arpc1b  
Psm2  
Raly  
Cytip  
Vps28  
Atp5g1  
Calm2  
Snrpe  
Ppp4c  
Ostf1  
Wdr1  
Ppp1cc  
Flna  
Bag1  
Sp100  
Eif3c  
Vim  
Cox17  
Psm5  
Gpsm3  
Gabarapl2  
Trir  
Erh  
Psm3  
Fosl2  
Sri  
Cox7a2  
Mrps24  
H2afj  
Srp9  
AY036118  
Lcp1

Atp5a1  
Atp5o.1  
Atp5j  
Anp32b  
Psmb1  
Cox5a  
1810058I24Rik  
Mrpl33  
Cox7b  
Ndufa1  
Anp32a  
Tomm22  
Ndfip1  
Stat3  
Ywhah  
Arf1  
Set  
Ndufb11  
Hnrnp1  
Uqcrcq  
Lyz1  
Fn1  
Ear2  
Retnla  
Lpl  
Tnip3  
Ccl6  
Crip1  
Ccr2  
Ccl9  
Psap  
Cxcl2  
Gpx1  
Gda  
Ly6e  
Il1b  
Tmsb4x  
Dok2  
Lyz2  
S100a6  
Fcr1s  
Mcup  
Lgals3

Unc119  
mt-Atp8  
Anxa2  
Batf3  
Ahnak  
S100a4  
H2-Ke6  
Alox5ap  
Ifitm6  
Pltp  
Olfm1  
mt-Nd4l  
Dbi  
H2-Ab1  
Smdt1  
H2-D1  
Capg  
Actg1  
Metrnl  
Naaa  
Lsp1  
Clec4b1  
Phlda1  
Sem1  
Areg  
Arpc1b  
Slamf9  
S100a10  
Gm2a  
Mt1  
H2-D1  
Ifi27l2a  
Rps27l  
Serf2  
Sdc3  
Pitpna  
Cotl1  
Atp5e  
Eef1a1  
Zyx  
Lilr4b  
Cfp  
Cyba

Colgalt1  
H3f3b  
Cdkn1a  
Gm10076  
Csf2ra  
Efhd2  
Vim  
Lmna  
Myl6  
Flna  
mt-Co3  
Bcl2a1b  
Ifitm3  
Rbpj  
Nfkbia  
Atox1  
Ctsd  
Fxyd5  
Tyrobp  
Zeb2  
Rpl9-ps6  
Icam1  
Prkcd

9-Sep

Tagln2  
Cd14  
Cd44  
Ubb  
Zfp36l1  
Mcl1  
Cebpb  
Adam15  
Nfil3  
Pid1  
Fgfr1  
Rps27  
Bcl2a1d  
B2m  
Prpc  
Id2  
ApoE  
Cd79a  
Tgfb1

Nme2  
Eps8  
Arf5  
Laptm5  
Itm2b  
Sec61b  
Malt1  
Rpl41  
Rpl18a  
Plbd1  
Ptprcap  
mt-Cytb  
2010107E04Rik  
Uba52  
Apc2  
Capza2  
Psmc7  
Ccn1  
Rpl35a  
Clec4a2  
Lamtor4  
Stk17b  
Cd37  
Uqc2  
Limd2  
Ramp1  
Lrp1  
Ptpre  
AW112010  
Ighm  
Tkt  
Anxa1  
Rassf4  
Uqc2  
Nfam1  
Gstm1  
Prdx5  
Ptp4a2  
Ptafr  
Sirpa  
mt-Nd5  
Ly6d  
Vps37b

Mrpl33  
Etv3  
Kctd12  
Mgl2  
Rpl3  
Glud1  
Ndufa6  
Csrnp1  
Ybx1  
Tmem160  
Pim1  
Kdm6b  
Atpif1  
Emp3  
Malat1  
Plek  
H2-T22  
Pycard  
Rac1  
Iqgap1  
Gnai2  
Ctsz  
Gadd45b  
Ucp2  
Capzb  
Erp29  
Selenop  
H2afz  
Irf5  
Reep3  
Diaph1  
Rps3  
H2afj  
Il2rg  
Egr2  
Cox4i1  
Rrbp1  
Rpl13a  
Marcks  
Preli1  
Rpl8  
Gltf  
Rpl19

Nrros  
Shisa5  
Klf2  
Ctss  
Sdf2l1  
Ncf2  
Tubb6  
Bhlhe40  
Ndufc1  
Abracl  
Chmp4b  
Usmg5  
Adgre5  
Rpl10-ps3  
Bola2  
mt-Nd2  
H2-T22  
Atp5l  
Sfr1  
Cox7c  
Ptpn18  
Plekho1  
Pf4  
Myo1g  
Sfn2  
Rps15a  
Mrps24  
Rpl12  
Serinc3  
Mrps21  
Hexa  
Cdk2ap2  
Timm13  
Arpc5  
Cox6b1  
Cops9  
Mpeg1  
Txn2  
Rex1bd  
Gsn  
S100a13  
Cdc42  
BC005537



Tspo  
Ypel3  
H13  
Hsp90b1  
Eif3f  
Uqcr10  
Arpc4  
Ndufb8  
Cox5b  
Metap2  
Cox6a1  
Kmt2e  
Taok3  
Fosl2  
Eno1  
Rac2  
Ddx5  
Ndufa2  
Jun  
Rpl10  
Grb2  
Cox6c  
Tma7  
Ndufb4  
Minos1  
Ndufv3  
Pkm  
Atp5g3  
Sec61g  
Tacc1  
Fkbp2  
Tpm3  
Ifrd1  
Rbm39  
Ndufa13  
Cox5a  
Atp5g1  
Lcp1  
Cnbp  
Naca  
Srrm2  
Foxp1  
Laptm4a

Psmb8  
Rnaset2a  
Fcgrt  
Pnrc1  
Ctsb  
Xist  
Ubc  
Park7  
Arl6ip1  
Arpc3  
Myl12b  
Ccl2  
Prrc2c  
Hmgb1  
Ifngr1  
Egr1  
Calm2  
Snrpb  
Sh3glb1  
Lgmn  
Naaa  
Rtl8c  
Clec9a  
Ifi205  
Xcr1  
Itgae

3-Sep

Ppt1  
Tlr3  
Wdfy4  
Qpct  
Irf8  
Naga  
Pianp  
Plbd1  
Cst3  
Anpep  
Slc25a20  
Rtl8b  
Ckb  
Mpeg1  
St3gal5  
Flt3

Tnni2  
Gm2a  
Pak1  
Trim35  
Rab7b  
Pkib  
Jaml  
Rab32  
Cd24a  
Ahr  
Psap  
Ece1  
Ncoa7  
Grasp  
Ptms  
H2-Aa  
Gng10  
BC028528  
Hepacam2  
Ppm1m  
Pfkp  
Nr4a2  
Anxa1  
Rab11fip1  
Tmsb10  
Atox1  
Fgl2  
Arzb  
Rnase6  
Txndc15  
Tmsb4x  
Cbfa2t3  
Bcl2a1a  
Lsp1  
Psmb9  
Pmaip1  
H2-Oa  
Olfm1  
Atpif1  
Lrrk2  
Gm6377  
Camk1d  
Tbc1d8

Tbc1d9  
Bcl2a1d  
Alox5ap  
Shtn1  
Ucp2  
H2afz  
Crip1  
Gpr171  
Plp2  
H2-K1  
H2afy  
Gpr65  
H2-D1  
Eef1b2  
Fnbp1  
S100a11  
H2-Q4  
Pomp  
Rab43  
Sh3bp1  
Bri3bp  
Actg1  
Cd180  
Commd8  
Cd74  
Rps11  
Egr3  
Slamf7  
Itgb7  
Taldo1  
Batf3  
Man2b1  
Prkar2a  
Cd9  
Sub1  
6-Sep  
Unc119  
Phf11b  
Cyca  
Irf5  
Fgd2  
Psme1  
Rala

Actb  
Psmb8  
Dynlt1b  
Basp1  
Clic4  
Cd52  
Anxa2  
Cytip  
Rplp0  
ApoE  
Ccnd1  
Cass4  
Lgals3  
Itpr1  
Alcam  
Dctpp1  
Vim  
Chd7  
Tmem176b  
Ppp1r11  
Agpat4  
Zyx  
Pafah1b3  
Id2  
Clec12a  
H2-Q4  
Apc2  
Gsn  
Efhd2  
Calm1  
Got2  
Lmnb1  
Plekho2  
Hfe  
Gusb  
Actr3  
Aif1  
Fuca1  
Selenop  
Tbca  
Ifi35  
Cxcl16  
Skap2

Sh3bgrl3  
S100a6  
Rpl18  
Myadm  
Cyb5a  
Rps5  
Napsa  
Cpne3  
Gdi2  
Skil  
Dock10  
Syng2  
Rpl28  
Sec61g  
C1qb  
Csf1r  
H3f3b  
Tbrg1  
C1qc  
Trib1  
Anxa6  
Cybb  
Csf2ra  
Hcls1  
Cnih4  
Rgs10  
Rps26  
Ccnc12  
Rps27a  
Cd86  
Tmem176a  
Fbl  
C1qa  
Rgs2  
B2m  
Mrc1  
Fam129a  
Tap1  
Irf5  
H13  
Rpl10-ps3  
H2-Q6  
Cebpb

Arhgap18  
Itm2c  
Pltp  
Rpl37  
H2-Oa  
Rpl17  
Phlda1  
Pf4  
Mrpl52  
Wfdc17  
Sec61b  
Zeb2  
Spi1  
F13a1  
Tes  
Lamp1  
Rpl22  
Rpl36al  
Mlec  
Nfkbiz  
Fgfr1  
Txn1  
Mvb12a  
Myo1f  
Plekho1  
Rtraf  
Gstm1  
Evi2a  
Nr4a1  
Ctsd  
Atg3  
Pdia3  
Rpl14  
Spag9  
Nr4a3  
Cyth4  
Il2rg  
Cd83  
Cd79a  
Rps28  
Notch2  
Itm2b  
P2ry10

Avpi1  
Cbr2  
Tnfrsf8  
Serf2  
Ifngr1  
Fxyd5  
Nap1l1  
Ptprcap  
Rpl27  
Ldha  
Fth1  
Mafb  
Rpl39  
Clec10a  
Jun  
Psme2

9-Sep

Pgam1  
Plin2  
Rps27l  
Ctsb  
Lgmn  
Usmg5  
Atp6v1g1  
Serinc3  
Twf2  
C1qbp  
Ctnna1  
Mgl2  
Atp1a1  
Sdf2l1  
Tspan13  
Gpcpd1  
Ssr4  
Capg  
Ctsa  
Mpc2  
Mdh1  
Rbm17  
M6pr  
Stard3nl  
Ppib  
Sh3bgrl



Ighm  
Ndufa6  
Eif1  
Sdc3  
Fcer1g  
Eif3k  
Atp5e  
mt-Atp8  
Tagln2  
Marcks1  
Polr1d  
Cxcl2  
Klf2  
Smdt1  
Csf2rb  
Fyb  
Ppp2ca  
mt-Nd2  
Socs3  
Ly6d  
Junb  
Gltf  
Rac2  
Cd14  
Mt1  
Arhgdib  
Ifi2712a  
Herpud1  
Ier3  
Hspa8  
Nfkb1a  
Calm2  
Ly6e  
Limd2  
Cfp  
Ctsc  
Tnfrsf25  
Atp6v0c  
Ccl2  
Lgals1  
Cd37  
Ypel3  
H2-T23

Pnrc1  
Gm42418  
mt-Nd4  
mt-Nd5  
Cltc  
Gadd45b  
Jund  
Shisa5  
Neat1  
Ftl1  
Gpx4  
Jak1  
Rap1b  
Emp3  
Snx5  
Ehd4  
Ubc  
Ifitm2  
Ccl6  
Foxp1  
Ddx5  
Klf6  
Tmem50a  
AW112010  
Ctss  
Cstb  
Ier2  
Ctsh  
Bri3  
Zfp36l1  
Laptn4a  
Cxcr6  
Actn2  
Thy1  
Il7r  
Cd3e  
Cd3g  
Il18r1  
Ramp1  
Lat  
Cd3d  
Icos  
Cd74

Rora  
Serpib1a  
Tmem176a  
H2-DMa  
H2-DMa  
S100a6  
H2-Aa  
Pxdc1  
Ifngr1  
Lmo4  
Rinl  
Rgcc  
Tyrobp  
Emb  
Bcl11b  
Skap1  
    1-Sep  
Tmem176b  
Itgb7  
Ckb  
Ltb  
Fcer1g  
S100a10  
Tmsb10  
Cst3  
Klf2  
Lyz2  
S100a11  
Ltb4r1  
Capg  
AW112010  
Itk  
Selplg  
Rasgrp1  
Zfp36  
S100a4  
Ifitm3  
Tmem64  
Uba52  
Ikzf3  
Hcst  
Gimap3  
Ptprcap

Ftl1  
Unc93b1  
Trbc2  
Cd83  
Cd82  
Fgl2  
Marcksl1  
H2-D1  
H2-DMb1  
ApoE  
Eef1a1  
Alox5ap  
Ctss  
Ccl6  
H3f3b  
Jund  
Mt1  
Ifi2712a  
Nfkbiz  
Lgals1  
Itgal  
Egr1  
Ifitm2  
Gpr183  
Plek  
Il2rg  
Ctsh  
Pltp  
H2-Q7  
H2-Aa  
Ccnd3  
Fos  
Tagln2  
Pld4  
Cfp  
Csfr1  
Ctsc  
Marcks  
Atf3  
Ly86  
Sptssa  
C1qb  
Wfdc17

Saraf  
Mcl1  
Spi1  
C1qc  
Nr4a1  
Jun  
H2-D1  
Mrc1  
Grn  
Cybb  
Ppia  
Zeb2  
C1qa  
Pf4  
Ier3  
F13a1  
Nfkbia  
Lgmn  
Ier5  
Fcgr2b  
Fth1  
Fxyd5  
Ctsb  
Ctsz  
Ly6e  
Cd68  
Nrros  
Oaz1  
Cd81  
Ccl2  
Fcgrt  
App  
Ehd4  
Fosb  
Dusp1  
Mgl2  
Rassf4  
Prdx6  
Mafb  
Psap  
Il1b  
Ier2  
Napsa

Clec10a  
Lyn  
Kdm6b  
Rpl13a  
Cd14  
Tspo  
Bri3  
Rps24  
Litaf  
Gstp1  
Hexa  
H2-Ab1  
Cd69  
Eno1  
Cxcl2  
Ncor1  
Rel  
Rpl12  
Klf4  
Ninj1  
Shisa5  
Prr13  
Atox1  
Gpx1  
Gimap4  
Aldoa  
B2m  
Stk24  
Socs3  
Anxa6  
Neat1  
Ly6a  
Rexo2  
H2afz  
mt-Atp8  
Rpl14  
Kctd12  
Atp6v0c  
Rplp2  
Klf6  
Rrbp1  
Snx5  
Ppp1r18

Cd79a  
Arf5  
Chd3  
Cd164  
Btg2  
H2-D1  
Cebpb  
Smpd13a  
Stat1  
Rpl28  
Ccn1  
Pfn1  
Rac2  
Gdi2  
Erp29  
Atp6v0b  
Psmb8  
Sdcbp  
Man2b1  
Gstm1  
Serp1  
Pkm  
Rabac1  
H2-Eb1  
Rps29  
Ubc  
Gapdh  
Junb  
Laptm5  
Ets1  
Myh9  
Ptms  
Clta  
Foxp1  
1810058I24Rik  
Zfand5  
Ucp2  
Leprot1  
Akr1a1  
Rps27l  
Cd52  
Ccnd2  
Fyb

Ppp1r12a  
Clic4  
Atpif1  
Lgals3  
Ighm  
Eif4a1  
H3f3a  
Rps26  
Npc2  
Rpl35a  
Crip1  
Diaph1  
Tax1bp1  
Cltc  
Id2  
Myl12b  
Tgfb1  
Arpc1b  
Tuba1b  
Ppp1r15a  
Dbi  
Efhd2  
Plp2  
Ctsa  
Atp5h  
Lamp1  
Ddx3x  
Rbm39  
Ndfip1  
Gm42418  
Sat1  
Ccr2  
Fam49b  
Capza2  
Prdx1  
Ndufv3  
Stat3  
Psme2  
Dock2  
Gltf  
S100a13  
Ndufa13  
Gm2a



Cd37  
Limd2  
Ahnak  
Rap1a  
Gabarap  
Rpl5  
Spcs2  
Dock10  
Ldha  
Ptpn1  
Krtcap2  
Selenow  
Gng5  
Sqstm1  
Cnn2  
Srsf5  
Calm2  
Wasf2  
Cnbp  
Smdt1  
Cdk2ap2  
Ptp4a2  
Ptpn6  
Vasp  
Clic1  
Syng2  
Aes  
Rnf187  
Hectd1  
Tmem59  
Arl6ip1  
Tmed2  
Xist  
Serinc3  
Jpt1  
Dusp5  
Vps37b  
Prdx5  
Rbm3  
Cytip  
Bcl2a1b  
Btg1  
Vps28

Gabarapl2  
Rpl4  
Sec11c  
Mif  
Dnajc3  
Prkar1a  
Fis1  
Arhgap45  
Sdf4  
Atp5b  
Gpsm3  
Selenof  
Cox5a  
Gnas  
Snrpg  
AY036118  
Psmb3  
Ppp1cc  
Ube2i  
Lars2  
Park7  
Pebp1  
Tma7  
Gsta4  
Arhgef1  
Atp5c1  
Cox6c  
Myl12a  
Tmbim6  
Grcc10  
Cyb5a  
Akr1b3  
Hmgb1  
Arf6  
Hist1h2ap  
Ube2c  
Mki67  
Top2a  
Pclaf  
Stmn1  
Birc5  
Hist1h1b  
Hist1h2af

Cenpf  
Cks1b  
Ccnb2  
Ccna2  
Cdca8  
Cdca3  
Tpx2  
Hist1h2ab  
Kif11  
Ncapd2  
Spc24  
Aurkb  
Prc1  
Rrm2  
Cdk1  
Tk1  
Cenpe  
Nusap1  
Kif15  
Bub1b  
Cenpm  
Ckap2l  
Smc2  
H2afx  
Asf1b  
Racgap1  
Knstrn  
Hist1h2ae  
Incenp  
Kif23  
Hmgb2  
Cks2  
Tacc3  
Tubb5  
Lmnb1  
Cenpw  
Ezh2  
Tuba1b  
Cenpa  
Smc4  
H2afv  
Tmpo  
Hist1h1d

Rrm1  
Ccdc34  
Gmn  
Kpna2  
Hmgn2  
H2afz  
Hist1h1e  
Ube2s  
Ptma  
Hjurp  
Nucks1  
Nsd2  
Dut  
Selenoh  
Gm10282  
Hmgb1  
Ckap5  
Tubb4b  
Anp32b  
Anp32e  
Atad2  
Mcm7  
Tipin  
Ran  
Nrm  
Dek  
Cdkn2d  
Usp1  
Hist1h1c  
Rangap1  
Dnmt1  
Alyref  
Tagln2  
Nap11  
Ncaph2  
Tuba1c  
Calm3  
Ppia  
Lsm2  
Anapc5  
Plp2  
Rad21  
Hdgf

Dnajc9  
Dctpp1  
Csrp1  
Snrpd1  
Hpf1  
Ywhah  
Cbx3  
Jpt1  
Nudt21  
Banf1  
Maz  
Pcna  
Pmf1  
Txn1  
Hnrnpab  
H2afy  
Hint1  
Rbm3  
Crip1  
Arl6ip1  
Snrpg  
Siva1  
Ranbp1  
Mrpl18  
Lsm5  
Actg1  
Sae1  
Bub3  
Smc6  
Dnajc2  
Tmsb10  
Slbp  
Pa2g4  
Lbr  
Lgals1  
Smc1a  
Srsf3  
Hnrnpa3  
Anapc11  
Exosc8  
Mrpl51  
Anxa2  
Snrpe

S100a10  
Rps27l  
S100a4  
Erh  
Gapdh  
Vim  
Ssrp1  
Lsm3  
Lsm4  
Actn4  
Elob  
Ctcf  
Ddx39  
Clic1  
Med30  
Raly  
Psip1  
Pfdn6  
Actb  
Mrpl28  
1810037117Rik  
Nudc  
Pdap1  
Mrpl57  
Lsp1  
Set  
Hnrnpd  
Cox5b  
Ptms  
Sf3b5  
Snrpc  
Cfbf  
Rbbp7  
Ybx1  
Sumo2  
Ndufb7  
Trim28  
Lsm6  
Baz1b  
Oaz1  
Vdac1  
Ndufb8  
Gnb2

Sms

Calm2

Smdt1

Atpif1

Olfm1

9-Sep

Tnip3

Snrpd2

Cenpx

Gng10

Pycard

Atp5g2

Snrpf

Mapre1

Pgam1

Purb

Hnrnpa2b1

Dazap1

Nol7

Ssna1

Kpnb1

Coro1c

Tpm4

Tmsb4x

Hnrnpul2

Aurkaip1

Zyx

Rnaseh2c

Stub1

Cd24a

Nono

Cdk4

Cycs

Vdac3

Hsp90aa1

Srsf2

Tmem14c

Cdkn1a

Cbfa2t3

Cfl1

Vps36

Cox7a2

Vars

Bax  
Trir  
Ccr2  
Dbi  
Smchd1  
Tra2b  
Tubb2a  
Rps27  
Ndufa11  
Srsf7  
Emp3  
Taf10  
Fam96a  
Il1b  
Gstm1  
Rwdd1  
Ywhae  
Pbrm1  
Traf1  
Atp5f1  
Id2  
Csnk2b  
Uqcr10  
Lgals3  
Rbbp4  
Atp5o.1  
Arhgdia  
Pkm  
Npm3  
Xist  
ApoE  
Cd44  
Uqcrrs1  
Atp5d  
Atp5g3  
Eif3l  
Preli1  
Naa38  
Cox6a1  
Atrx  
Flna  
H3f3a  
Serbp1



Gnb1  
Fkbp2  
Gpx1  
Sh3bgrl3  
Gtf2h5  
Ptges3  
Sf3b2  
Cops9  
Tcp1  
S100a11  
Pcbp2  
Uqcrq  
Tep1  
Malat1  
Hnrnpf  
Atp5j2  
Hnrnpu  
Cotl1  
Myadm  
Snrpb  
Tpi1  
Psmb9  
Csf2ra  
Atox1  
Minos1  
Cd209a  
mt-Nd2  
Cmtm7  
Atp5j  
Naaa  
Itm2b  
Eef1a1  
Lsm12  
Ube2n  
Gm2a  
Selenop  
Ndufa4  
Junb  
Cox8a  
H2-D1  
C1qa  
C1qc  
Wdfy4

mt-Atp8  
Fth1  
Rpl10-ps3  
Atp5e  
Pf4  
Ccl4  
C1qb  
Rpl9-ps6  
Nfkbia  
Mafb  
Ftl1  
Csf1r  
Gm42418  
Ctsb  
Sqstm1  
Btg1  
Pnrc1  
Zfp36l1  
Fcgrt  
Mrc1  
Ly6d  
Ly6e  
Lgmn  
Ubc  
Lyz2  
Marcks1  
Cd79a  
mt-Nd4  
F13a1  
Pfdn5  
Cd14  
Neat1  
Ctss  
Klf2  
Arg1  
Csf2  
Il5  
Ccr8  
Ccdc184  
Lif  
Gata3  
Klrg1  
Ptpn13

Rnf128  
Rora  
Hs3st1  
Il2ra  
Areg  
Il1rl1  
Lpcat2  
Inpp4b  
Itk  
Tnfrsf18  
Cd74  
Il7r  
Lmo4  
Cish  
Hilpda  
Rplp1  
H2-D1  
H2-K1  
H2-DMb1  
Rpl23  
Furin  
Ftl1  
Cxcr6  
Tmem64  
Tyrobp  
Rps7  
Rps10  
Rpl37a  
Cst3  
Rpl13  
Icos  
Fcer1g  
Ramp1  
Lyz2  
Uba52  
Rps24  
Ly6a  
Alox5  
Ltb  
Rps20  
Rpl19  
Klf2  
Ltb4r1

Gadd45b  
Ahcy12  
Gpx1  
Emb  
Nfkb1  
Skap1  
Rps2  
Mdfic  
Tnfaip3  
Ctss  
Cnot6l  
Gimap3  
Rpl32  
Rps15a  
H2-D1  
Rps3  
Cd69  
Rpsa  
Rgs2  
Ifitm3  
Rgcc  
Psap  
Rps18  
Rpl39  
Cd83  
Rps8  
Rps16  
Rpl8  
Rpl10a  
Rps11  
Rpl15  
Rpl27a  
Marcks11  
Apoe  
Rps3a1  
Unc93b1  
Fth1  
Trbc2  
Rps5  
Rpl9-ps6  
Ccl6  
Samsn1  
Alox5ap

H2-DMb1  
Rpl36a  
Id2  
Rplp0  
Rps14  
Eef1a1  
Mt1  
Itpr2  
Ctsb  
Thy1  
Ifi2712a  
Rpl18  
Ctsc  
Rps9  
Rps4x  
Rps19  
Rps21  
Rpl30  
Ccr2  
Gm10076  
Ifitm2  
Mcl1  
Ctsh  
Grn  
Rplp2  
C1qb  
Pltp  
Wfdc17  
Tpt1  
Rpl12  
Cd82  
Plek  
Zfp36  
Rpl36  
Ly86  
Marcks  
C1qc  
Rps6  
Rpl35  
Rpl29  
H2-D1  
Nrip1  
Selenop

C1qa  
Prdx6  
Rpl18a  
Csf1r  
Pld4  
Mrc1  
Rps27a  
Rpl14  
Cfp  
Pf4  
Rpl11  
Cybb  
Rpl27  
Rpl22  
Rpl7  
Itgb7  
Ccl2  
Spi1  
Crip1  
Tspan13  
F13a1  
Cd68  
Lgals3  
B2m  
Ier3  
Rpl38  
Lgmn  
Fcgr2b  
Ptprcap  
Il2rg  
Rpl5  
Zeb2  
Rpl34  
Dnaja1  
App  
Mafb  
Rpl21  
Actb  
Fcgrt  
Rps26  
Atf3  
Rack1  
Rps27

Ldha  
Cd14  
Socs3  
Rpl3  
H2-DMb2  
Npc2  
Ppp1cc  
Rassf4  
Clec10a  
Mgl2  
Hcst  
Selenot  
4930523C07Rik  
Rps12  
Fkbp3  
Rpl24  
Ppia  
Napsa  
Cd79a  
Nfkbia  
Rps23  
Clta  
Atp6v0b  
Rpl26  
Rpl28  
Rpl22l1  
Sat1  
S100a4  
Rpl6  
Atp6v0c  
Iqgap1  
Eef1b2  
H3f3a  
Vps37b  
Srgn  
Rel  
Litaf  
Anxa2  
Pde4b  
Arpc1b  
Rpl37  
Nr4a1  
Ccnd2

Nfkbid  
Efhd2  
Egr1  
Rpl9  
Slc25a3  
Hexa  
Rpl13a  
Ptpn18  
Fosb  
Nfkbiz  
Ighm  
S100a10  
Aff4  
Tagln2  
Shisa5  
Zfp36l1  
Ctsa  
Kctd12  
Sptssa  
Ubc  
Dusp5  
Ctsz  
Ptpn6  
Ier5  
Rps13  
Bri3  
Ets1  
Plec  
Cltc  
Rps28  
Neur13  
Neat1  
Ptms  
Tmem176b  
Naca  
Clic4  
H2-K1  
Gabarapl2  
Man2b1  
Dusp1  
Ly6d  
Hsp90b1  
Ehd4



Gdi2  
Rpl7a  
Esys1  
Nr3c1  
Laptm4a  
Foxp1  
Saraf  
Gabarap  
Tmem176a  
Prdx1  
Rexo2  
Atox1  
Odc1  
Xist  
mt-Nd1  
Pim1  
Rgs10  
Ier2  
Lmna  
Nrros  
Brd2  
Erp29  
Eif4a1  
Fos  
Calm1  
Lcp1  
Pole4  
Fosl2  
Hspa5  
H2afz  
Gnai2  
Fam107b  
Tuba1b  
Anxa5  
Btg1  
Uqcrh  
Snx5  
Npm1  
Jun  
Ncor1  
Fkbp1a  
Snx3  
Myh9

Ythdc1

Lsp1

Fam49b

Arpc2

Sh3bgrl3

Rps15

1-Sep

Aes

Rhoa

Lars2

Ccn1

Akr1a1

Fxyd5

Rpl17

Canx

Cox6c

Ifrd1

S100a6

Wnk1

Rpl4

Gstm1

Gng5

Eif3f

Atpif1

Ucp2

Rrbp1

9-Sep

Pebp1

Syng2

Rap1a

Rtn4

Selplg

Dbi

Btf3

Mrfap1

Lamp1

Rps27l

Gpx4

Calr

Aldoa

Bhlhe40

Rac2

Cd52

Sh3glb1  
Sub1  
Klf4  
Rpl23a  
Gpr132  
Ctsd  
Rap1b  
Gstp1  
Scand1  
Usmg5  
Atp6v0e  
Rabac1  
Spcs2  
Capza2  
Gltp  
Elf1  
Cebpb  
Atp5g2  
Eif5  
Jpt1  
Rapgef6  
Txn1  
Ptbp3  
Pomp  
Vps28  
Flna  
Cyba  
Ostf1  
Klf6  
Gm8186  
Mrpl33  
Snrpf  
Csnk2b  
Eif3h  
Vamp8  
Uqcrb  
Sdcbp  
Dazap2  
Elob  
Zfand5  
Atp6v1g1  
Tbca  
Serp1

2010107E04Rik

Dynll1

Rpl31

Mif

Sec11c

Sec62

Eif3e

Anp32b

Prdx5

Eif3a

Ndufb5

Cytip

Itgb2

Lgals1

Igkv6-15

Ighv1-58

Mzb1

Fcrl5

Cd79a

Plac8

Ctla4

Iglc3

Blk

Nfatc1

Iglc2

Cd79b

Ms4a1

Gm30211

Ly6a

Ighm

D10Wsu102e

Ly6e

Ly6d

Rpl8

Igkc

Hepacam2

H2-K1

Rpl30

Cxcr5

Fcmr

Apobec3

H2-DMb1

Camk2d

Sh3bp5  
Fcer1g  
Tyrobp  
Junb  
A530040E14Rik  
Cd19  
Lyz2  
Napsa  
Ebf1  
Cst3  
Bank1  
Myo1e  
Dnajc7  
Cd37  
Txnip  
Rpl37  
mt-Cytb  
Rpl3  
Cd24a  
Zfp36  
Dusp1  
Odc1  
Cyp4f18  
Foxp1  
Gimap5  
Ifitm3  
Rpl13  
Fcrla  
Gm8369  
Fos  
Rac2  
Tmsb4x  
Nfkbiz  
Rps9  
Ftl1  
Rps20  
Ltb  
Ptprcap  
Cybb  
Ccl6  
Tsc22d3  
Alox5ap  
Gm15987

Mt1  
Gpx1  
Rps15a  
Rps18  
Cd55  
Tmem176b  
Dok3  
Ctsb  
mt-Atp8  
mt-Nd4l  
Rps7  
Rps19  
Egr1  
Uchl3  
Rps27  
Ifitm2  
Gimap6  
Vim  
Rps26  
Tagln2  
Fth1  
mt-Nd5  
Rpl9-ps6  
Pold4  
Crip1  
Csf1r  
Gimap1  
Pltp  
Selenop  
Rps3a1  
Atox1  
C1qb  
C1qc  
Pf4  
Rps13  
Ier3  
Emp3  
Rpsa  
Psm14  
Ifngr1  
C1qa  
Rps24  
Rpl32

Nfkbia  
Sub1  
Pdia4  
Fosb  
Vars  
Syk  
Mrc1  
mt-Co3  
Psap  
Itm2b  
F13a1  
Npc2  
Pfdn5  
Rpl19  
Arpc1b  
Rpl27a  
Mtss1  
Tmem176a  
Rps11  
Zfp36l2  
Cd68  
Rgs10  
Fcgrt  
Rps3  
Klf4  
Ahnak  
Gstm1  
Rac1  
Lgals1  
Man1a  
Hvcn1  
Actg1  
Zfp706  
Rps2  
Zyx  
Mafb  
Cd14  
Ccl2  
Cd52  
Ifi27l2a  
Rpl34  
Lgmn  
Cxcl2

Cd38  
Cfp  
Jun  
Grn  
Gimap3  
Anxa5  
Wfdc17  
B2m  
Pkig  
Klf6  
Gimap4  
Sp140  
Cd69  
Efhd2  
Lgals3  
Tnfaip3  
Itgb2  
Anxa2  
H2-DMb1  
Eef1d  
Tcf4  
Atpif1  
Mif4gd  
Kctd12  
Rpl14  
Pfn1  
Rap1b  
Eif4b  
Actb  
Rpl12  
Man2b1  
Gnai2  
Zbtb20  
Neat1  
Nrros  
Myl6  
Lamp1  
Tmod3  
Cnp  
Gadd45b  
Zeb2  
Clta  
Fyb



Ctsc  
Ier5  
Cox5a  
Rpl36  
Rel  
Malat1  
App  
Ier2  
Nr4a1  
Sem1  
Atp6v0c  
Marcks  
Kdm6b  
Ppp1r18  
Ctsa  
H2afz  
Rab4b  
Rps6  
Ncf4  
Hexa  
Ly86  
Atp6v0b  
Pde4b  
Ctsd  
Serf2  
Tmem50a  
Eif3h  
Cdc42  
H2-Q7  
Lyn  
S100a10  
Cotl1  
Rilpl2  
Mcl1  
Gltpl  
Sh3bgrl3  
Rpl21  
Blnk  
Dnaja1  
Flna  
Laptm5  
Arf5  
Arpc2

H2afy  
Calm1  
Wnk1  
Sdcbp  
Rpl22  
Tpm3  
Ywhaz  
Polr2a  
Gm2a  
Gng5  
Oaz1  
Tgfb1  
Dbi  
Myh9  
Cfl1  
Apc4  
Ndufb8  
Stk17b  
Cstb  
Ccn1  
Ncl  
Rbms1  
Btg2  
Ehd4  
Nol7  
Npm1  
Tspo  
Eif3f  
Puf60  
Atf3  
Ptms  
Eif4a2  
Selplg  
Pou2f2  
Ctsh  
Chd4  
Arf6  
Aracl  
Fam49b  
Prdx5  
Cox8a  
Zfand5  
Hmgn1

Cebpb  
Aldoa  
Rpl36a  
Capg  
Plp2  
Mbnl1  
Atp5g2  
Akr1a1  
Gm26917  
lgkv1-117  
Ptp4a2  
Uvrag  
Mdh1  
Ppp1r15a  
Vamp8  
Jund  
Eef1b2  
AY036118  
Uqcr10  
1810037117Rik  
Ezr  
Gabarap  
Erp29  
Snx20  
Fxyd5  
Gdi2  
Rrbp1  
Txn1  
H2-DMa  
Xist  
Tmsb10  
Reep5  
Clic4  
Cd53  
Ostf1  
Ywhae  
Prr13  
Glud1  
Atp6v1f  
Fus  
Gnb2  
Atp6v1g1  
Cd83

Bri3  
Cox6b1  
Sec61b  
Ddx39b  
Pafah1b1  
Eif3e  
Lamtor2  
Kmt2e  
Cltc  
Eef1g  
Smim14  
Rhog  
Socs3  
Psmb1  
Uqcrq  
Pld4  
Pcbp2  
Atp5j  
Arpc5  
Calm3  
Tln1  
Hnrnpa1  
Scaf11  
Ywhah  
Srsf11  
Calm2  
2010107E04Rik  
Cnbp  
2410015M20Rik  
Canx  
Ndufb10  
Prg2  
Derl3  
Jchain  
Eaf2  
Iglc1  
Slpi  
Txndc5  
Mzb1  
Plpp5  
Iglv1  
Creld2  
Cacna1s

Trp53inp1  
Igkc  
Iglc2  
Fam46c  
Fam214a  
Ckap4  
Pdia4  
Edem2  
Xbp1  
Ighm  
Pou2af1  
Edem1  
Txndc11  
Sdc1  
AC133103.1  
Isg20  
Iglc3  
Phgdh  
Tmsb4x  
Spcs2  
Herpud1  
Sec11c  
Hsp90b1  
Hyou1  
Manf  
Ly6a  
Actb  
Fkbp2  
Lman1  
Sdf2l1  
Rgcc  
Tmem154  
Fth1  
Fau  
Spcs1  
Prdx4  
H13  
Rps9  
Tpt1  
Hdlbp  
Serp1  
Rexo2  
Ssr4

Ctla4  
Ergic1  
Selenos  
Spcs3  
Junb  
Sel1l  
Rps29  
Rplp1  
Actg1  
Rpl37a  
Trabd  
Rps11  
Pfn1  
Pafah1b3  
mt-Co1  
Rps16  
Tyrobp  
Krtcap2  
Rpn1  
Trp53i11  
Ddost  
Sec61a1  
Rps12  
Tmem248  
Ift20  
Rpl30  
Rpl23  
Sh3bgrl3  
Fcer1g  
Rps23  
Gpx1  
Pdia6  
Rpl27a  
Cfl1  
H2-Aa  
Rps5  
Rps27  
Lyz2  
Dnajb11  
Rpl39  
Rps19  
Dusp1  
Rpl13

Ube2j1  
Tmed2  
Crip1  
Rps4x  
Rps15a  
Rpl32  
Rps21  
lgkv12-44  
Mrpl57  
Ppia  
Spint2  
Dnajc3  
Eef1a1  
Clptm1l  
Rps13  
Slamf7  
Kdelr1  
Ifitm3  
Rpl7  
Chchd10  
Slc39a7  
Btg2  
mt-Co3  
Fcrla  
H2-Ab1  
Rpl34  
Cnpy2  
Slc35b1  
Preb  
Rps14  
Tram1  
Tmed10  
Erp44  
Rps3a1  
Vim  
Rpl36  
Rps10  
Rpl11  
Rpl18a  
Rps7  
Rpl19  
H2-K1  
mt-Nd2

Derl1  
Myl6  
Ptpn18  
Rps18  
Psap  
Ccl6  
Uba52  
Rpl37  
Laptm5  
Alox5ap  
Arpc1b  
mt-Atp8  
mt-Co2  
Nfkbiz  
Mtdh  
Irf4  
Srpr  
H3f3a  
Rplp2  
Surf4  
Arpc2  
Rpl3  
Rps27a  
Slc3a2  
Ly6d  
Rpl15  
P4hb  
Lman2  
Cst3  
Rpl22  
Rps28  
Ssr2  
Cmah  
Rps2  
Rpl27  
Marcks1  
Csf1r  
Kdelr2  
Rps3  
Ifitm2  
Coro1a  
Rpsa  
Rap1a



Ier2  
Rps6  
Tspan13  
Gm10076  
1110008P14Rik  
Rpl35  
Sars  
Rps26  
Cd24a  
Nr4a1  
Rpl9-ps6  
Ubxn4  
Gnai2  
Rpl26  
Mgat1  
Tmsb10  
Rpl36a  
Clta  
Tmbim4  
Rps8  
Igv1-117  
Morf4l2  
Rpl6  
Rpl12  
Rpl28  
Tmed9  
Odc1  
Marcks  
Cope  
C1qa  
Hspa5  
Ero1lb  
Ftl1  
Ssr3  
Txnl1  
St6gal1  
Zfp36  
F13a1  
Ctsh  
Btg1  
mt-Nd1  
Gorasp2  
Rpl10a

Igkv3-2  
Hist1h1c  
Apoe  
Sec61b  
Uchl3  
Vcp  
Pltp  
Rpl38  
Rpn2  
Sec61g  
Stk17b  
Lcp1  
Pf4  
Rps20  
Wfdc17  
Klf4  
Rpl35a  
Cd14  
Ccl2  
C1qb  
Tpm3  
Mdh1  
C1qc  
mt-Atp6  
Tagln2  
S100a6  
Arf4  
Ptma  
Nucb1  
Cox4i1  
Serf2  
Zeb2  
Calr  
Srp9  
Ddx5  
Cox8a  
mt-Nd4  
Ctsc  
Mrc1  
H2-K1  
H2-Q7  
Rpl13a  
Dnajc7

H2afz  
mt-Nd4l  
Lgals3  
H3f3b  
Rps15  
Atf3  
Ifngr1  
Actr3  
H2-DMa  
Tmem258  
H1f0  
Cd74  
Clic1  
Fcgrt  
Oaz1  
Ly86  
Cdc42  
Ahnak  
Arpc3  
Arhgdib  
Ier3  
Cotl1  
Klf2  
Selenop  
Rpl21  
Kdm6b  
Naca  
Cxcl2  
Capzb  
Rpl18  
Mafb  
Bri3  
Hspa8  
Cfp  
Gm42418  
Hsp90ab1  
Cyba  
Spi1  
Rpl23a  
Cd68  
Rps25  
Rpl10-ps3  
Rack1

Rpl36a1  
Ostc  
Pld4  
Ifi2712a  
Nrros  
Sat1  
Fam49b  
Rpl8  
Npm1  
Rps24  
Capza2  
Atp2b1  
Atp5g1  
Rpl24  
Fus  
App  
Arpc5  
Rac1  
Mcl1  
Anxa2  
Flna  
Rpl14  
Zfp3612  
Ppib  
Socs3  
Anxa5  
Kctd12  
Sem1  
Myh9  
Rpl9  
Vamp8  
Eno1  
Efhd2  
Atox1  
Ptprc  
Lamp1  
Slc25a3  
Rrbp1  
Eif1  
Cebpb  
Pfdn5  
Sdcbp  
Hexa

Sqstm1  
Tln1  
Rpl5  
Emp3  
Fos  
Mt1  
Rpl10  
Ctsb  
Rpl29  
Pde4b  
Atp5e  
Hnrnpa2b1  
Npc2  
Gadd45b  
mt-Nd5  
Rbms1  
Brk1  
Ost4  
Iqgap1  
Egr1  
Ctsa  
Rap1b  
Litaf  
Uqcrh  
Lgmn  
Grn  
Pabpc1  
Cnn2  
Ucp2  
Ccnl1  
Dbi  
Chd4  
Arf5  
Hsp90aa1  
Gltf  
Fyb  
Glud1  
Gmfg  
Ndufa6  
Lsp1  
Rhog  
Plek  
Sub1

Itgb2  
Ctsd  
Rpl22l1  
Snx3  
Msn  
Pnrc1  
Jund  
Prdx5  
Tgfb1  
Fxyd5  
Srgn  
Chchd2  
Cltc  
Rpl41  
Rpl4  
Rel  
Tmem176b  
Tspo  
Malat1  
Rgs10  
Gm8186  
Pdia3  
Eif3e  
Tnfaip3  
Cd83  
Rpl7a  
Atpif1  
Cox7a2l  
Limd2  
Mbnl1  
Zyx  
Ubc  
Dazap2  
Ybx1  
Cstb  
Itm2b  
S100a10  
Anp32a  
Cox6c  
Rbm39  
Atp5l  
Tomm7  
Ptms

Eif3f  
Sri  
Calm2  
Akr1a1  
Lgals1  
Snx5  
Xist  
Eef1b2  
Rpl31  
Wasf2  
Cox7c  
Gpi1  
Zfp36l1  
Atp6v1g1  
Jak1  
Tpr  
Grcc10  
Arpc4  
Tuba1b  
Morf4l1  
Calm1  
Napsa  
Rnaset2a  
Gng5  
Psme1  
Neat1  
Ehd4  
Arhgap45  
Hmgb2  
Arhgdia  
AY036118  
Hspe1  
Akap13  
Atp5h  
Tnfrsf4  
Izumo1r  
Sostdc1  
Tnfsf8  
Ikzf2  
Cd3e  
Ctla4  
Tox  
Tigit

Lag3  
Cd3g  
Cd4  
Cd5  
Cd3d  
Lck  
Cd247  
Icos  
Tnfrsf18  
Cd82  
Pdcd1  
Zap70  
Trbc2  
Cst7  
Cd27  
Smco4  
Trac  
Cd2  
Lat  
Eea1  
Gimap3  
Ltb  
Il2rb  
Slamf6  
Tcf7  
Socs1  
Cxcr3  
Il21r  
Ubal2  
Ly6a  
AW112010  
Tyrobp  
Prkch  
Skap1  
Areg  
Hif1a  
Fcer1g  
Inpp4b  
Prkca  
Shisa5  
H2-Q7  
Bcl11b  
Fyn



Ms4a4b  
Cst3  
Gimap6  
Ets1  
Ndfip1  
Cd28  
Ptprcap  
Gimap4  
H2-K1  
Psap  
Lyz2  
H2-Q7  
Thy1  
Stat1  
H2-Q7  
Cd74  
H2-Eb1  
Bhlhe40  
Gapdh  
Ftl1  
Zfp36  
Rac2  
Ifitm3  
Gpx1  
Lcp2  
Limd2  
Fos  
Tspan13  
Ccl6  
Malt1  
Odc1  
Rinl  
Il7r  
Sla  
Alox5ap  
Batf  
Rhoh  
Itpkb  
Pnrc1  
H2-DMa  
Sdf4  
Gm8369  
ApoE

Srgn  
Fosb  
Gna13  
Rabgap1l  
Tmem176b  
Crip1  
Ubb  
Ctsh  
Mt1  
Unc93b1  
Tgif1  
Pltp  
Nfatc1  
Csfr1  
Malat1  
Fth1  
Pglyrp1  
Egr1  
Il2rg  
Myh9  
Ptpn11  
Ptpn22  
Ier3  
Mcl1  
Cdkn1b  
Grn  
Wfdc17  
Marcks  
S100a11  
Chd3  
Ctsc  
Peli1  
Mrc1  
C1qc  
Atf3  
Pld4  
Cirbp  
Vps37b  
C1qa  
Smc4  
Rgs1  
Pf4  
Fyb

Plek  
Kctd12  
Ifitm2  
Cfp  
Junb  
Spi1  
Ddx39b  
Klf4  
H2-DMb1  
Akap13  
Smpd13a  
Eef1a1  
Nrros  
Tmem176a  
Fcgrt  
Mafb  
Marcksl1  
C1qb

1-Sep

Itga4  
Fcgr2b  
Cd68  
Nrip1  
Pfn1  
F13a1  
Coro1a  
Gstm1  
Lgmn  
Nfatc3  
App  
Btg1  
Per1  
Kmt2a  
Ccl2  
Emb  
H2-DMb1  
Lgals3  
Zeb2  
Cd14  
Ptprc  
Orai1  
Itgal  
Hexa

H2-Q7  
Arhgap45  
Npc2  
H2afz  
Nfkbiz  
Pkm  
Jun  
Erp29  
Stk17b  
Eprs  
Gsta4  
Tmsb10  
Cd69  
Cxcl2  
Ehd4  
B2m  
Selenop  
Cdk2ap2  
Tnfaip3  
Fxyd5  
Eef2  
Ncor1  
H2-DMa  
Ankrd12  
Itgb7  
Tnfrsf1b  
Clic4  
Rpsa  
Itgb1  
Ly86  
Ctss  
H2-DMa  
Gm2a  
Phf20l1  
Ghitm

9-Sep

Ypel3  
Csnk1a1  
Tnfaip8  
Cybb  
Atp6v0b  
Prkar1a  
Cnn2

Fam107b  
Xist  
B4galnt1  
Rbm39  
mt-Atp8  
Lcp1  
Rbm3  
Rpl10  
Lrp10  
Csnk2b  
Hcst  
Man2b1  
Tnrc6b  
Tsn  
Aldoa  
Ppia  
Cltc  
Neat1  
Atox1  
Litaf  
Vim  
Saraf  
Myl12b  
Serbp1  
Camk2d  
Tmsb4x  
Clta  
Rapgef6  
Eif3f  
Pim1  
Bri3  
Lrrfip1  
Ddx24  
Arl6ip1  
Mdh1  
Ppp1r12a  
Ythdc1  
Psm2  
Rps29  
Dad1  
Sf3b2  
Bcl2a1b  
Capg

Tecr  
Zyx  
Apbb1ip  
Atp5c1  
Ube2b  
Son  
Klf2  
Cd83  
Prdx2  
Arf4  
Sri  
Ctsa  
Traf1  
Arid4a  
Lamp1  
Psmb8  
Snx5  
Grcc10  
Arhgdib  
S100a10  
Cct8  
Ldha  
Sptbn1  
Rrbp1  
Srpr  
Serinc3  
Bcl2a1d  
Serf2  
Ube2i  
Napsa  
Jak1  
Psme1  
Ube2d3  
mt-Nd6

7-Sep

Atrx  
Prcc2c  
Arf1  
Msn  
Cnbp  
Tob2  
Anxa5  
Cd37

Vcp  
Sem1  
Sec11c  
Hsp90b1  
Cd52  
Rpl35a  
Puf60  
Rnf187  
Tmbim4  
Akr1a1  
Atp6v1g1  
Psmb1  
Anxa2  
lgkv1-117  
Psme2  
H2afy  
Gm8797  
ler2  
Rnaset2a  
Eno1  
Gpr132  
Rnaset2b  
Zfand5  
Sdcbp  
Gm42418  
Eif3c  
Prdx5  
Ost4  
Kmt2e  
Hmgb1  
ler5  
Btg2  
Mtdh  
Tmem50a  
Ctsb  
Mycbp2  
Atp5b  
Tpm4  
Ddx5  
Ezr  
Stk4  
Ctsz  
Skp1a

Ptms  
Tomm20  
Trir  
Gstp1  
Eif4a2  
Hnrnpk  
Eif3i  
Itm2b  
Mif  
Lbh  
Foxp1  
G3bp1  
Psm3  
Rpl22l1  
Elob  
Cyba  
Pde4b  
Fscn1  
Apol7c  
Cacnb3  
Nudt17  
H2-Q7  
Mreg  
Socs2  
Il4i1  
Ccl22  
Il12b  
Strip2  
Ankrd33b  
Aldh1a2  
Zmynd15  
Tbc1d4  
Fabp5  
Rogdi  
Anxa3  
Tmem123  
Plxnc1  
Basp1  
Ccr7  
Tmtc2  
Relb  
Net1  
Serpnb6b



Bcl2a1a  
Spint2  
Cxcl16  
Tspan3  
Pfkfb3  
Birc2  
Samsn1  
Adam8  
Ccl5  
Bcl2a1b  
Nostrin  
Serpina9  
Avpi1  
Iscu  
Ccl17  
Mthfd2  
Bmp2k  
Tmem39a  
Fam49a  
Tbc1d8  
Fam60a  
Cpne2  
Lrrk1  
Pcgf5  
Bcl2a1d  
Id2  
Etv3  
Ly75  
Gyg  
Traf1  
Ube2l6  
Actn1  
Rgs1  
Gli3r2  
Epsti1  
Csf2rb2  
Mxd1  
Tmsb4x  
Pgap2  
Foxp4  
Cd63  
Ggta1  
Arl5c

Psme2  
Flt3  
Myo1g  
Lsp1  
Jak2  
Clic4  
Bhlhe40  
Map3k14  
Grasp  
Pmaip1  
Syng2  
Tmem131l  
Sdhaf1  
Actg1  
Nr4a3  
Htra2  
Csrp1  
Gadd45b  
Adora2a  
Uap1  
Map4k4  
Cdc42ep3  
Aebp2  
Csf2rb  
Ly6e  
Rnf115  
Gpr132  
Ogfrl1  
Actb  
Etv6  
Cblb  
Fam32a  
Gfpt1  
Spr  
Pik3r1  
Rel  
H2afz  
Marcks  
Casp3  
Il21r  
Cbfa2t3  
Atox1  
Hivep1

Psmc1  
Tmem176a  
Batf3  
Calm1  
Gpr137b  
Mkl1  
Cd40  
Lactb  
Dpp4  
Ccnc88a  
B2m  
Arhgap31  
Fam129a  
Cd44  
Ktn1  
Crip1  
Rftn1  
Psmc8  
Selplg  
Rap2b  
Traf6  
Marcks11  
Cst3  
Grk3  
Ptpn18  
Lyz2  
Anxa4  
Fth1  
Nudt9  
Txndc17  
Arl4c  
Phf11b  
Npc2  
Prex1  
Tmem176b  
Nrp2  
Rpsa  
Lima1  
Apoe  
Dusp5  
Rps27l  
Jund  
Cnn2

Mob3a  
Swap70  
Rnf19b  
Trafd1  
Nfkbia  
Mvp  
S100a11  
Tank  
Btg1  
Malat1  
Nav1  
Itgb1  
Herpud1  
AW112010  
Gtpbp4  
S100a4  
Rassf2  
Ncoa7  
Ptms  
Selenop  
H2-DMa  
Rabgap1l  
Tap1  
Cd83  
Sri  
Tes  
H2-Eb1  
Clec2d  
Apobec3  
Ctsz  
Rps19  
Anxa2  
Ikbkb  
Bri3bp  
Mrpl14  
Pbxip1  
Zfp36l1  
Cdkn1a  
H2-DMb2  
Psmg4  
Dynll2  
Malt1  
C1qb

Fos  
Brk1  
Psmb9  
Cd47  
Asap1  
Tuba1c  
Alox5ap  
Myl6  
Fosb  
Stk4  
Csf1r  
Rhog  
Edf1  
Birc3  
Ccl6  
Cytip  
Nfkb2  
Zfand6  
Itm2c  
Egr1  
Ier2  
C1qa  
Rala  
Gmfg  
Rac2  
Supt4a  
Trim35  
Nfkbie  
Mrc1  
Ctsc  
Smarce1  
Sbno1  
C1qc  
Vim  
Wnk1  
Jun  
Wdr1  
H2-DMb1  
Pltp  
Tnfrsf1b  
Cfp  
Dstn  
Cebpb

Stk17b  
Ostf1  
Slc6a6  
mt-Cytb  
Klf4  
Shisa5  
Ctnna1  
Sqstm1  
Ifitm3  
Pde4b  
Itga4  
Myo9b  
Slamf7  
St8sia4  
Nrip1  
Ighm  
Zfp36l2  
Rab8b  
Arf4  
Nfkbib  
Mafb  
Unc93b1  
Nfil3  
Klf2  
Tubb2a  
Cd14  
Ccl2  
Cd53  
Atpif1  
Fcgr2b  
Coro1b  
Fnbp1  
F13a1  
Pf4  
Srgn  
Itm2b  
Snx20  
Sec61b  
Uvrag  
Ifngr1  
Serp1  
Txn1  
Ctsd

mt-Nd2  
Dusp2  
Kxd1  
Tap2  
Got1  
Fxyd5  
Ifi2712a  
Cybb  
Cflar  
Serinc3  
Rps26  
Stat1  
Smchd1  
Fcer1g  
Grn  
Wfdc17  
Hsp90b1  
Rbm17  
Skil  
Arhgap30  
Rtraf  
Sub1  
Vcp  
Arhgdib  
Icam1  
Vamp8  
Pim1  
Cyba  
Cd79a  
Sh3glb1  
Hint1  
Tubb5  
Ak2  
Psmb10  
B4galnt1  
Lamp1  
Dap  
mt-Atp8  
Ccni  
Man2b1  
Pirb  
Cstb  
Skap2

Spop  
H3f3a  
Ywhah  
Arpc4  
Scand1  
H2-DMb2  
Krccl1  
Hsp90ab1  
Ahnak  
Atp6v0e  
Junb  
Krtcap2  
Efhd2  
Dock8  
Ctsb  
Tagln2  
Fcgrt  
Ly6d  
Ctsh  
Aup1  
Ptprcap  
M6pr  
Ly86  
Myh9  
Scpep1  
Plid4  
Psm5  
H2-DMb2  
Irf1  
Hspa5  
Tspo  
Chchd2  
Snx5  
Taok3  
mt-Nd1  
H2-DMb1  
Capg  
Rpl7a  
Pfn1  
Cxcl2  
Ldha  
Eloc  
Ehd1



Ghitm  
Mbnl1  
Tapbp  
Srsf3  
Rgs10  
Ehd4  
Peli1  
Zfp706  
Rpl13a  
Ier3  
Cd37  
Necap2  
Prkcd  
Cdk2ap2  
Tpm4  
Slc38a2  
Cdc42se1  
Tnfaip8  
Ctsa  
Hexa  
Nr4a1  
Abracl  
Scamp2  
Btg2  
Rplp1  
Selenok  
Sh3bgrl3  
Ier5  
S100a10  
Nap1l1  
Hspa8  
Ccdc50  
Gstm1  
Ypel3  
Tgfb1  
4930523C07Rik  
Socs3  
Ubxn1  
Eno1  
Nme2  
Psap  
Csnk2b  
Cox5b

Cox5a  
Litaf  
Itgb2  
Tln1  
Tmem50a  
Cd68  
Rpl12  
Tra2a  
Coro1a  
Gstp1  
Tmbim4  
Ddx5  
Dusp1  
Emp3  
Ube2n  
Prcp  
Dek  
Ilk  
Slc3a2  
Zeb2  
Ndfip1  
Ncf1  
Dad1  
mt-Nd4  
mt-Atp6  
Ptpn6  
Rassf4  
Mlf2  
Sdcbp  
Pcbp2  
Grcc10  
Lgals1  
Rps17  
Tbca  
Fyb  
Gpcpd1  
Atf3  
Samhd1  
Hnrnpa3  
Gm2a  
Hsp90aa1  
Cd52  
Ptprc

Stat3  
Eif5a  
Cotl1  
Iqgap1  
Clic1  
Slc25a5  
Ifitm2  
Ube2l3  
Il1r2  
Il1b  
Tnfaip2  
Gsn  
Ccl22  
Ccl17  
Il1a  
Itgax  
Bhlhe40  
Grasp  
Cst3  
Ccr12  
Epcam  
Smim3  
Spint1  
Gng10  
Cd74  
Gm2a  
Itgae  
Cd9  
Nfkb1a  
Qpct  
Ptgs2  
Ccl4  
Cd209a  
H2-DMb1  
Basp1  
Smpd13a  
Wdfy4  
Nfe2l2  
Tctex1d2  
Dusp2  
Actn1  
H2-DMb1  
Bcl2a1d

Gsg1  
Havcr2  
Rtl8c  
Lgals3  
Nr4a3  
Dusp5  
Ccr1  
H2-DMa  
Etv3  
Sec61b  
Plet1  
Hexb  
Ywhah  
Csf2rb  
Icam1  
Nr4a2  
Mdh2  
Tnip3  
Herpud1  
Atox1  
Pkib  
Tnfsf9  
Kit  
Pak1  
Vrk1  
Cxcl16  
Vasp  
Pilra  
Themis2  
Med21  
Ppp1r1a  
Taldo1  
Gngt2  
Igsf8  
Bcl2a1a  
Akr7a5  
Rogdi  
Csrnp1  
Rasgef1b  
Malt1  
Cd300c2  
Tbc1d9  
Lsp1

Skil  
Ebi3  
Ccdc12  
Tep1  
F11r  
Napsa  
Slamf7  
Ivns1abp  
Sdf2l1  
Tbc1d4  
Tnf  
Lmnb1  
Csf2ra  
Lcp1  
Plbd1  
Spi1  
Ncf1  
Cd33  
Pmaip1  
S100a11  
Tmem238  
Ssr4  
Gdi2  
Elovl5  
Srgn  
Syng2  
Bcl2a1b  
Arl5c  
Slc2a6  
Dapk1  
H2-Ab1  
Gpi1  
Rgs1  
Ppfia4  
Fam49b  
Ifitm6  
Got1  
Mical1  
Flt3  
Ikbkb  
Arl4c  
Hck  
Jak2

Anpep  
Card11  
Tmem39a  
Sh3bgrl3  
Jaml  
Cd52  
Aif1  
Sowahc  
Fgl2  
Agpat4  
Hk2  
Ccnd2  
Nlrp3  
Nr4a1  
Atxn10  
I830077J02Rik  
Tnfaip3  
Zfp593  
Gapdh  
Actg1  
Cyb5r3  
Rtn1  
Maff  
Ccdc88b  
Plcb2  
Med29  
Alcam  
Nap11  
Rplp0  
Cytip  
Rheb  
Mrpl52  
Stap1  
Lpcat2  
Nfkbib  
Tnfaip8  
Cotl1  
Ptms  
Hfe  
Fam105a  
Pilrb2  
Fth1  
Plk3

Csrp1  
Alox5ap  
Ctss  
Cass4  
Sulf2  
H2-Eb1  
Tbc1d8  
Gadd45b  
Tmem131  
Ctsz  
Dot1l  
Irf4  
Lsm6  
Tmsb4x  
Zeb1  
Plscr1  
Egr3  
Snx20  
Filip1l  
Neur13  
Mkl1  
Ccnd1  
Soat1  
Nfkbie  
Rpl14  
Spint2  
Actb  
Atp6v0e  
H2-Aa  
Klrd1  
Isy1  
Coq10b  
Nceh1  
Tmed5  
Arf6  
Osgep  
Abi3  
Cbfa2t3  
Pim1  
Man2b1  
Nedd8  
Uqcc2  
Gabarapl2

Tuba1c  
Rnase6  
Wdr1  
Ckb  
Crtc3  
Rbm17  
Tgif1  
Tgfb1  
Btg2  
Ms4a6c  
Arf4  
Myh9  
Crlf2  
Pip5k1c  
Khk  
Atpif1  
Apbb1ip  
Cd300a  
Myl12a  
Ece1  
Sf3b1  
Rbbp7  
Rnaset2a  
Rel  
Fes  
Rtraf  
Glipr1  
Cd72  
Pcbp1  
Dapp1  
Ifrd1  
Tyrobp  
Exosc5  
Ube2f  
Srsf7  
Myo1f  
Tmem14c  
Rassf5  
Fem1c  
Mrpl30  
Cd24a  
Sf3a2  
Snx10



Mgl2  
Gtf2b  
H2afy  
Rps27a  
Myl12b  
Prdx6  
Slc25a4  
Pgam1  
Clic4  
Dock10  
Rpl29  
Rab11fip1  
Cdc42  
Eif4g3  
Gpx1  
Cd86  
Eef1b2  
Irf5  
Rbmxl1  
Dennd4a  
Nuak2  
Rsu1  
Gpsm3  
Pdlim5  
Mpc1  
Ly86  
Rpl6  
Tm2d2  
Tpm4  
Rpl28  
Rnh1  
Ap3b1  
Ubl5  
Rpl39  
Tbrg1  
Uqcrb  
Acsl5  
Traf1  
Rin3  
Eef1a1  
Erp44  
Litaf  
Fgr

Tma7  
Ncf2  
Lamtor1  
Sbds  
Itgb2  
Rps26  
Dnaja1  
H2-DMb2  
Gsto1  
Bri3bp  
C1qbp  
Psme1  
Rps5  
Myo1g  
Fryl  
Sh3bgrl  
Fam46a  
Chd7  
Rpl35  
Erh  
Eif3k  
Arpc4  
Tob2  
Mrps18a  
Gpr183  
Pabpc1  
Snap23  
Rpl10-ps3  
Pde4b  
Adprh  
Serf2  
Polr2g  
Actr3  
Rpl37  
Hint2  
Acp5  
Cox5a  
Atp5e  
Atp6v1g1  
Nme2  
mt-Co3  
mt-Co1  
mt-Cytb

mt-Atp8  
mt-Nd2  
Ubb  
Eif1  
mt-Atp6  
H3f3b  
H2-DMb2  
Gm42418  
mt-Nd4  
H2-Aa  
Foxp1  
H2-DMb1  
Jund  
Zfp36l1  
Zfp36l2  
Itm2b  
Shisa5  
Neat1  
Serinc3  
Emp3  
Lgals1  
Ehd4  
Ptprcap  
Cd81  
Marcksl1  
Mafb  
Ctsd  
Klf6  
Cd37  
Csfr1  
Ly6d  
Pltp  
Cd14  
Cebpb  
Ifi27l2a  
Ahnak  
Klf4  
Ighm  
F13a1  
Mrc1  
Klf2  
Ccl6  
Cd79a

Selenop  
Lyz2  
Ccl2  
C1qc  
Pf4  
C1qa  
C1qb  
ApoE  
Nr1h3  
Colq  
H2-Ab1  
Cxcl9  
Il18bp  
Hebp1  
Cxcl13  
Mmp14  
Fabp5  
C3  
Phyhd1  
Dnase1l3  
Fam26f  
Gdf15  
Vcam1  
Cxcl16  
Apobec1  
Acp2  
Snx24  
Lag3  
Fam20c  
Aif1  
Cd63  
Fcgr4  
Slamf8  
Ccl8  
Anpep  
Rgs1  
Ms4a7  
Acp5  
Pla2g7  
Cd300c2  
Tmem86a  
Tspan3  
C1qb

Pla2g2d  
Pdlim4  
C1qa  
Lgals3bp  
Rab20  
Aoah  
Pld3  
Slc25a33  
Ctsz  
Creb5  
Axl  
C1qc  
Lpcat2  
Tmem37  
Il1rn  
Ctss  
Tnfaip2  
Tnfsf13  
Plbd2  
Slamf7  
Psap  
Stard9  
Lst1  
Tmem106a  
Tspan4  
Lamp1  
Fscn1  
Atp6v0c  
Acvrl1  
H2-DMb1  
P2rx4  
Itgax  
Mitf  
Rasa4  
Bcl2a1a  
Ctsb  
Tmem176a  
Mtmr10  
Sirpa  
Ninj1  
Il4i1  
Cstb  
Cd68

Fth1  
Ccr12  
Cd302  
Itm2c  
Cd300ld3  
Rnf149  
Ppt2  
H2-DMa  
Cebpa  
Lgmn  
Camk1  
Slc15a3  
Anxa4  
Fam213b  
Ccl12  
Cd74  
Amdhd2  
Clic4  
Clec4a3  
Csf2rb  
Pirb  
Il11ra1  
Hpgds  
Cyba  
St8sia6  
Gngt2  
Cd81  
Cxcl10  
H2-Eb1  
Bcl2a1b  
Lgals3  
Lyz2  
Efhd2  
Syng2  
Lair1  
Sdc3  
Litaf  
Slc11a1  
Basp1  
Slc31a2  
Itm2b  
Tmem176b  
Fcgr3

Ifrd1  
Pim3  
Abcg1  
Mpeg1  
Anxa3  
Ctsd  
Naxe  
Rogdi  
Cd300ld  
Wfdc17  
Fam46a  
Clec4n  
Grn  
Ftl1  
Vamp5  
Plxnb2  
Gda  
Ctsa  
Tpd52  
Nagk  
Aldh3b1  
Pltp  
Cndp2  
Polb  
Fcgr2b  
Relb  
Tank  
Nfe2l2  
Daglb  
Fgr  
Scarb2  
Insig1  
Ldlr  
Mrpl13  
Cd300a  
Oxct1  
Lmna  
Plbd1  
0610012G03Rik  
Echs1  
Rab7b  
Edem2  
Mafb

Anxa5  
Clec4a1  
Serpina3g  
Rps7  
Hexa  
H2-DMa  
Strn4  
Timp2  
Slc3a2  
Rilpl2  
Ftl1-ps1  
Rps14  
Cfp  
Stat1  
Klhdc3  
Nfil3  
Rpl13  
Rpl8  
Unc93b1  
Dhrs1  
Tpt1  
Tcirg1  
Rpl36  
Rpsa  
Rps15a  
Frmd4b  
Npc2  
Med29  
Coro1b  
Akr1a1  
Rps3a1  
Igsf6  
Fcer1g  
Cd38  
Gm5617  
Rgs10  
Atox1  
Dctn2  
Il1b  
Rps5  
Lrp1  
Cd14  
Iscu



Mdfic  
Sat1  
Pgap2  
Cxcr4  
Rps16  
Glul  
H2-Aa  
Gbp2  
Rps27

1-Mar

Abhd12  
Bcat2  
Vim  
Plk2  
Sash1  
P2ry6  
App  
Herpud1  
Gm36161  
Hexb  
Pld4  
Ly86  
Filip1l  
Fau  
Gns  
Leprot  
Asah1  
Myo5a  
Ifngr2  
AW112010  
Myof  
Rabep1  
Gpr137b  
Rpl37a  
Clec4a2  
Csf2ra  
Batf3  
Rpl32  
Cebpb  
M6pr  
Rpl18a  
Uap1l1  
Lpin2

Vma21  
Vat1  
Csf1r  
Nrp2  
Dnajb14  
Rrad  
Selenop  
Ndufb8  
Glx  
Sdc4  
Mcur1  
Ppp1r12c  
Capza2  
Lrpap1  
Rpl18  
Med10  
Prpf38b  
Prex1  
Soat1  
Gltp  
Rps3  
S100a1  
Rgl1  
Pmp22  
Rpl34  
Ak2  
Rpl30  
Vps41  
Iah1  
Atp6ap2  
Tbxas1  
Ntan1  
Rps19  
Pon2  
Fam173a  
Cx3cr1  
Tinf2  
Ptms  
Lpl  
Myo1f  
Rps23  
Rps24  
Znfx1

Bri3  
Rrbp1  
Rbm47  
Atp6v1b2  
Rps8  
Zfp703  
Dram2  
Ifitm2  
Pttg1ip  
Ly9  
Ccr5  
Entpd1  
Creg1  
Rps4x  
Arl5c  
Vamp8  
Gng2  
Ap1s1  
Rps10  
Tpm1  
Atp6v0b  
Osgep  
Hck  
Ctsl  
Fuca1  
Lrrk1  
Uba52  
Tex264  
Sde2  
Atpif1  
Epsti1  
Cd44  
Znhit1  
Nfkb2  
Dtnbp1  
Tyrobp  
Ubl3  
Hfe  
Bola3  
Srgap2  
Ctsc  
Rps11  
Dse

Tmem256  
Nrros  
Adam17  
Sdcbp  
Gm10076  
Emc7  
Rps9  
Rpl10a  
Rpl7  
Rpl9-ps6  
Golga4  
Tmsb10  
Id2  
Lyn  
Cmtm3  
Cybb  
Qdpr  
Rpl37  
Sik1  
Ctnnb1  
Mcub  
Rps12  
S100a6  
Prdx1  
Tpp1  
Trappc3  
Pycard  
Lrrc25  
Sgpl1  
Vdac2  
Xdh  
Plxnd1  
Prkcd  
Rab5c  
B2m  
Apoe  
Irf8  
Rpl23  
Rps27a  
Lamtor1  
Gpr65  
Sdhc  
Etfa

Plgrkt  
Clec12a  
Ptpn1  
Cox5a  
Eprs  
Rhog  
Calm2  
Ifnar1  
Laptm4a  
Rpl11  
Yif1b  
Rps18  
Psm6  
Rasgef1b  
H2-Eb1  
Grb2  
Grina  
Sdhb  
Atp6v0d1  
Atp5c1  
Nenf  
Spcs1  
Rpl39  
Sh3glb1  
Atp6v1e1  
Ndufc2  
Nsfl1c  
Atp6v1a  
Mink1  
Rpl27a  
Lsp1  
Magt1  
Rpl35  
Ndufs3  
Rnf19b  
Man2b1  
Rps21  
Map7d1  
Ergic3  
Tiparp  
Ilk  
Slfn2  
Rpl27

Rnh1  
Rnf130  
Eef1a1  
Atg5  
Coro1a  
Cyfip1  
Ifi27  
Fosl2  
Rtf2  
Mtch1  
Pigp  
Fyb  
Colgalt1  
Sec61g  
Nfkbie  
Ndufs2  
Plek  
Ucp2  
Dnajc15  
Prdx2  
Il2rg  
Lilr4b  
Fkbp15  
BC028528  
Comt  
Rps29  
Zeb2  
Pacsin2  
H2-Ab1  
Mvb12a  
Dnase2a  
Bcl2a1d  
Rnf213  
Ier2  
Rpl38  
Rplp2  
Rpl6  
Cd84  
Rps6  
Mrps34  
Igbp1  
Rps13  
AI413582

Ets2  
Rps20  
Eno1  
Slc35b2  
Edf1  
Gm21188  
Clta  
Rps2  
Rps28  
Rpl23a  
Prdx5  
Rack1  
Rplp1  
H2-Ab1  
Napsa  
Sulf2  
Runx3  
Mgat2  
Gabarap  
Got1  
Icam1  
Rpl14  
Naca  
Reep5  
Rpl9  
Lman2  
Sdf2l1  
Cuedc2  
Aamp  
Prcp  
Per1  
Vcp  
Atp6v1d  
Tubb2a  
Uqcrb  
Mapkapk2  
Txn1  
Tnfrsf1b  
Ehd4  
Gpx1  
Ctsh  
Gimp  
Mrpl14

Dctn3  
Rpl19  
Cd83  
Ms4a6c  
Stard3nl  
Ccgc88a  
Atp2b1  
Arpc1b  
Rpl5  
Ptprcap  
S100a10  
Dnajb6  
Lipa  
Ccl5  
Rpl12  
Mlf2  
Card19  
Ifi2712a  
Fgl2  
Minos1  
Rpl26  
Cd79a  
Il10rb  
Acaa1a  
Rplp0  
Mvp  
Spi1  
Selenos  
Lcp2  
Gpr132  
Rpl22  
Tgfb1  
Atp5g3  
Map2k2  
Aldoa  
Gusb  
Rpl13a  
Psmb5  
Hsp90ab1  
Cd9  
Pf4  
Rtraf  
Rps26



Sqstm1  
Rheb  
Mrpl36  
Arhgap45  
Btg1  
Saa3  
Prg4  
Alox15  
Serpib2  
Padi4  
Cd5l  
Lrg1  
Selp  
Prtn3  
F5  
Tgfb2  
Ltbp1  
Ptgis  
Wnt2  
Fabp7  
Cald1  
Itga6  
Olr1  
Calml4  
F10  
Gm16104  
Cgn1  
Icam2  
Thbs1  
Slpi  
Fn1  
Emilin2  
Fabp4  
Il6  
Ecm1  
Mcemp1  
Engase  
Timd4  
C4b  
Plxdc2  
Pygl  
Ltc4s  
Flnb

Cxcl13  
Itgam  
Clec4d  
Gadd45a  
Gda  
Clec4e  
Bst1  
Msr1  
Ptgs1  
Cxcl2  
Cxcl1  
Ednrb  
Osm  
Atp1a3  
Evi5  
Ccr12  
Fabp5  
Wfdc17  
Nupr1  
Hgsnat  
Gngt2  
Timp2  
Lyz2  
Cd9  
Sdc3  
St3gal5  
Hp  
Man2a1  
Ier3  
Ank  
Cfp  
Alox5ap  
Pilra  
Cybb  
Polr3gl  
Lyz1  
Fgfr1  
Tcn2  
Cebpb  
Khk  
Cd14  
Prdx5  
ApoE

Klf13  
Pros1  
Plaur  
Ipmk  
Gpx1  
Itgb2  
Comt  
Klf9  
Fcna  
App  
C1qc  
Mgst1  
Smpdl3a  
C1qb  
Cd74  
Ifitm3  
Pycard  
Adgre1  
Tmsb10  
Gapdh  
H2-Aa  
Cd84  
Tyrobp  
H2-Eb1  
Plk2  
Tnfsf13  
H2-Eb1  
Add3  
Pltp  
Lrp1  
Nfkbia  
Fcgr3  
Plek  
Ctsl  
Dusp1  
Hacd4  
Ifitm2  
Coro1a  
C1qa  
Pmp22  
Txn1  
Lpl  
Mafb

Hexa  
Cd52  
Ier2  
Rbpms  
Fam46a  
Ccl6  
Rhoc  
Creg1  
Neat1  
Cfh  
Bmp2  
Tmx1  
C5ar1  
Cyba  
Nlrp3  
Ctsd  
Lamp2  
Camk1  
Dapk1  
Dhrs3  
Sgms1  
Pgd  
Hipk2  
Mfsd5  
Pf4  
Ftl1  
Tmsb4x  
Malat1  
Phlda1  
Alox5  
Derl1  
Gng5  
Srgn  
Selplg  
Tagln2  
Idh1  
Egr1  
Jun  
Tnfaip8  
Dhrs7  
Lamtor4  
Nucb1  
Nin

Glul  
Ccl24  
Man2b1  
Tmco1  
Actg1  
Anxa3  
Gimp  
Cdkn1a  
Cd86  
Ccnc12  
Ctss  
Sdf2l1  
Lgals3bp  
Itgb1  
Ly6e  
AI467606  
Cotl1  
Acy  
Ppp3ca  
Aldh2  
Pam16  
Lrpap1  
Stk17b  
Tmed3  
Zfp36  
Ccn1  
Rps8  
Npc2  
Vkorc1  
Ifnar2  
Aplp2  
Sel1l  
Ninj1  
Cd83  
Ubash3b  
Cflar  
Park7  
Reep3  
Ndufv3  
Cd93  
Cd36  
Itsn1  
Tiparp

Nr4a1  
Bola3  
Arrb2  
Dnajb9  
Cd302  
Tb1x  
Tmem14c  
Ahnak  
Pfn1  
1810009A15Rik  
Lptm5  
Rpl13a  
Tln1  
Gnaq  
Grn  
Snx1  
Rpl10  
Bin1  
Dusp3  
Vsir  
Ier3ip1  
Fxyd5  
S100a1  
Ifngr1  
Gorasp2  
Txnrd1  
S100a6  
Ost4  
Ighm  
Ccl9  
Lcp1  
Cmtm7  
Rnpep  
Zeb2  
Ifitm6  
Znhit1  
Mrps15  
Klf6  
Ptprc  
Gmfg  
Ets2  
Fermt3  
2900097C17Rik

Psmb8  
Sptbn1  
Nenf  
Bcl2a1b  
Ppib  
Btg1  
Dbi  
Ssr4  
Gtf2h5  
Sft2d1  
Msrb1  
Blvrb  
Prdx6  
Junb  
Tgfb1  
Hexb  
Nfkbiz  
Cox6a1  
Ptprcap  
Napsa  
Drap1  
Lamp1  
Trf  
Ncf2  
Manf  
Myh9  
H2-Aa  
Rps24  
Cd79a  
Ptms  
H2-Ab1  
Ndufa1  
C3ar1  
Sod2  
Plin2  
Rpl18  
Zc3h12a  
Os9  
Ndufa4  
Ppp1r15a  
Rps2  
H2-Ab1  
Klf2

Adam15  
Ncf1  
Eno1  
Rpl8  
Irf2  
Rps15a  
Mrc1  
Glud1  
Atp6v1a  
Sec61a1  
Ndfip1  
Lrrc25  
Rgs10  
1110008F13Rik  
Gstm1  
Unc119  
Snx5  
Atp6v0b  
Psm7  
Fkbp2  
Ehd1  
Nfic  
Psm2  
Rpl19  
Hmgb2  
Spi1  
Nme2  
Trib1  
Cyfip1  
Gusb  
Apbb1ip  
Sem1  
Cox6c  
Rpl18a  
Nr4a2  
Sat1  
Id2  
Cox6a2  
Ccr9  
Klk1  
Dntt  
Gm21762  
Atp2a1



Klk1b27  
Grm8  
Obscn  
Sh3bgr  
Lrp8  
Smim5  
Pacsin1  
Atp1b1  
Siglech  
Cd300c  
Klra17  
Runx2  
Rpgrip1  
Mctp2  
Lefty1  
Traf4  
Slpi  
Upb1  
Cyb561a3  
Nek6  
Sla2  
Lag3  
Lair1  
Rnase6  
Cd7  
N4bp3  
Slc41a2  
Slc44a2  
Sell  
Tbc1d8  
P2ry14  
Csf2rb2  
Ctsl  
Bst2  
Emid1  
Nucb2  
Srgap3  
Irf8  
Dnajc7  
Rell1  
Gapt  
Tmem229b  
Ly6c2

Sirt3  
Tsc22d1  
Iglc3  
Plac8  
Mpeg1  
Ppfia4  
Arid3a  
Snx18  
Klrd1  
Tifa  
Slc15a4  
Tcf4  
Tspan13  
Edem2  
R3hdm4  
Cd300lf  
Khk  
Ptprs  
Ncf1  
Ldhb  
Npc1  
Dap  
Flt3  
Arhgap24  
Spib  
Kmo  
Scap  
Adpgk  
St8sia4  
AU040320  
Syne2  
Clec9a  
Ccl4  
Sec24d  
Rps6ka1  
Hpse  
Mvb12a  
Pafah1b3  
Jaml  
Pycr2  
Fes  
Sema4b  
Scimp

Fyn  
Selplg  
Gsn  
Pgls  
Grn  
Tmem106c  
1700017B05Rik  
Bcl11a  
Pmepa1  
Tyrobp  
Rabgap1l  
Hmgn3  
Uso1  
Stambpl1  
Cdip1  
Gpr171  
Pld4  
Ap1ar  
Rufy1  
Dpf2  
Gng10  
Rpl31  
Xbp1  
Blnk  
Fcrla  
Tmed3  
Cmah  
Gnas  
Rnaset2b  
Plaur  
Glrx3  
Aaed1  
Aff3  
Hs3st1  
Adssl1  
Cd180  
Cdkn2d  
Slamf9  
Zbtb38  
Sec61b  
Fgfr1op2  
Cybb  
Rnf187

Pkig  
H13  
Fam46c  
Nceh1  
Gltp  
Zmiz2  
Uvrag  
Map3k1  
Golgb1  
Fam174a  
Abhd17a  
Ifnar2  
Psap  
Trim25  
Cnp  
Coro2a  
Snx5  
Il7r  
Fth1  
Syng2  
Cib1  
Abhd17b  
Gtf2i  
Fyb  
Ech1  
Pltp  
Grasp  
Spcs3  
Rexo2  
Man1a2  
Hyou1  
Trappc5  
Smc6  
Ctsh  
Rac2  
Nedd9  
Pip5k1c  
Plekhm3  
Cd164  
Uggt1  
Apobec3  
Gm5617  
Parvg

Svbp  
Tmem258  
Ssr1  
Sp140  
Atp13a2  
Slc38a1  
Rilpl2  
Tagln2  
Dync1h1  
Ubxn4  
Cyth4  
Tapbp  
Eil2  
Emc10  
Ctsb  
Stx7  
Ramp1  
Dock10  
Serp1  
Csf2rb  
Tmem55b  
Ubl7  
Selenos  
Cd47  
Sik1  
Txndc5  
Rogdi  
Junb  
Fam3c  
Dusp1  
Slc35c2  
Ptpn6  
Ctso  
Card11  
Emc2  
Irf7  
Tomm20  
Fam98c  
Tagap  
Apc  
Bloc1s2  
Ube2e1  
Ppp1r14b

Mef2c  
Sash3  
Prkca  
Ywhae  
Lpgat1  
Ak2  
Smim14  
Prkcd  
Slc29a3  
Ptms  
Ndufs3  
Ptprcap  
Amfr  
Sun2  
Map7d1  
Tns1  
Snap29  
Rap1a  
Arf1  
Ccnd1  
Cnot8  
Arhgap17  
Arhgef6  
Mydgf  
Hsp90b1  
Reep5  
Gmps  
Etv6  
Sec11c  
Zyx  
Ddost  
Phf11b  
Il21r  
Cmtm7  
Crip1  
Copg1  
Vcp  
Dctn3  
Abcg1  
Atraid  
Fgr  
Tmsb4x  
D10Jhu81e

Ly6d  
Ivns1abp  
H2-Ab1  
Lgals1  
Herpud1  
Runx3  
Commd6  
Pdia3  
Ly6e  
Mrpl43  
Lrrc59  
    11-Sep  
Jund  
Manf  
Unc93b1  
Itgal  
Lyz2  
Arl5c  
Cops4  
Gns  
Rpl10-ps3  
Itpr1  
Dctn6  
Hnrnpul1  
Pik3ap1  
Sec13  
Pqbp1  
Top1  
Rbm47  
1110008P14Rik  
Mdp1  
Rbm38  
Dnajc1  
Orai3  
Eif5a  
Tmed2  
Ptpre  
Psmb1  
Chd9  
mt-Co1  
Pdia6  
Ebp  
Psmb8

Rnaset2a  
Senp6  
Ucp2  
Ddx47  
Tgfb1  
BC031181  
Eprs  
Sin3b  
Lsp1  
Nek7  
Hmgb1  
Mtdh  
Rbm42  
Rrbp1  
H2-Eb1  
Creld2  
Stt3a  
Hmox2  
Tmed9  
Dnajb11  
Ttc14  
Hectd1  
Tmem176b  
Cct8  
BC004004  
Gdi2  
Ly6a  
Ndufs8  
Med10  
Gpcpd1  
Srp19  
Atp5c1  
Rsrp1  
Ufm1  
Prkcb  
Cytip  
Xist  
Mzb1  
Fndc3a  
Hnrnpa2b1  
Gstp1  
B4galnt1  
Skap2



Usp4  
Clic4  
Vim  
Ifitm3  
Psme2  
Lsm12  
Laptm5  
Mtpn  
Cd83  
Mbnl1  
Dennd4a  
Ndufa3  
Mapre1  
Tra2a  
Foxo1  
Nolc1  
Rtf2  
Ctcf  
Otub1  
Litaf  
Gusb  
Rgs10  
Gadd45gip1  
Alox5ap  
Napa  
Itpr2  
Cope  
Ccl6  
Prr13  
Tnfaip8  
Pdia4  
Pigt  
Anapc5  
Actr10  
Stoml2  
Ap3d1  
Fam43a  
Grina  
Polr2m  
Prdx5  
Cd52  
Egr1  
Sec11a

Jun  
Tmed10  
Marcksl1  
Bri3bp  
Irf1  
Spn  
Ssr4  
Dbnl  
Ssr2  
Mt1  
Tmem219  
Rab24  
Washc2  
Mrfap1  
Dnajc3  
Eif3f  
Hspa5  
Tkt  
Dusp5  
Jtb  
C1qc  
Tmem176a  
Ccnd3  
Hmgn2  
Leprot  
Ccni  
Skil  
P2ry10  
C1qa  
Psme1  
Wfdc17  
Smg1  
Per1  
Cyfip2  
Naga  
Hmgn1  
Ripor2  
Ppia  
Atf3  
Cct7  
Srsf3  
Cd44  
Mybbp1a

Uchl3

Nptn

Hnrnpa3

P4hb

Rnh1

Stt3b

Saraf

Rab11b

Snapc5

9-Sep

Eif4g1

Ppp1r15a

Ndufb2

Ppp1r11

M6pr

Tram1

Eef2

Cox7c

Tmem30a

Mff

Pf4

Atp2b1

Pcif1

Ier2

Acaa1a

Ifngr1

Tpd52

Stk4

Fam107b

Npc2

H2-Aa

Nrd1

Ssna1

Spcs1

Krtcap2

Mrpl17

Apoe

Acadl

Ube3a

Ifitm2

Sod2

Gpi1

Atp5b

Ctsz  
Tax1bp1  
Cdk4  
G3bp1  
Sec61g  
Cd81  
Rhog  
Bsc12  
Psm2  
S100a10  
Arpc3  
Slc25a4  
Rb1cc1  
H2-Aa  
Ier3  
Thrap3  
Klf4  
Cyc1  
Ctsa  
Stk17b  
Rnf13  
Tubb2a  
Fcgr2b  
Gm8797  
Epn1  
Rplp1  
Nsmce4a  
Csf1r  
Tm9sf2  
Glx5  
Nfkbiz  
AC149090.1  
Mpc1  
Ighm  
Got1  
Cct5  
C1qb  
Tecr  
Grcc10  
Papola  
Snx9  
Rnf149  
Ptpn1

Sema4d  
Ndufs2  
Arpc1a  
Sdc4  
Klf6  
Birc6  
Ufc1  
Arl6ip5  
Mrc1  
Mxd4  
Selenop  
Morf4l2  
Psmb10  
Oaz1  
Smc1a  
Sp110  
Uqcrc2  
Cd68  
Tnrc6b  
Smdt1  
Dynll1  
Cbfa2t3  
Clec12a  
Ablim1  
Scand1  
Eif3l  
Cyfip1  
Gatad2b  
Atp6v1d  
Lyn  
Baz1b  
Pim1  
Lgals9  
H2-Eb1  
Shisa5  
Atg3  
Rbbp4  
Lsm8  
Rasa3  
Luc7l2  
Evi2a  
Rbm17  
Ccl2

Lgmn  
F13a1  
Lnpep  
Limd2  
Nono  
Lrrfip1  
Nfkb1a  
Srsf7  
Glg1  
Taldo1  
Aurkaip1  
Lrp10  
Trim28  
Hnrnpk  
Psm5  
Prpf8  
Rpl27a

| cluster | reference_cell_type | reference_id          |
|---------|---------------------|-----------------------|
| 0       | Macrophage          | MF.11c-11b+.Lu        |
| 0       | Macrophage          | MF.AT.v2              |
| 0       | Macrophage          | MF.11cloSer.SI        |
| 0       | Macrophage          | MF.480hi.LV.Naive     |
| 0       | Macrophage          | MF.103-11b+.SI        |
| 1       | B cell              | B.Fo.Sp               |
| 1       | B cell              | B.T2.Sp               |
| 1       | B cell              | B.T3.Sp               |
| 1       | B cell              | B.Fo.MLN              |
| 1       | B cell              | CD19Control           |
| 2       | DC                  | DC.11b-.AT.v2         |
| 2       | DC                  | DC.103+11b-.Lu        |
| 2       | DC                  | DC.8-.Th              |
| 2       | DC                  | DC.103-11b+24+.Lu     |
| 2       | DC                  | DC.8+.Th              |
| 3       | Macrophage          | MF.11c-11b+.Lu        |
| 3       | Macrophage          | MF.AT.v2              |
| 3       | Macrophage          | MF.F480hi.Gata6ko.PC  |
| 3       | Macrophage          | MF.Thio5.II-480hi.PC  |
| 3       | Macrophage          | MF.Thio5.II+480int.PC |
| 4       | T cell              | CD8.96h.LN            |
| 4       | T cell              | T.8Nve.Sp.OT1         |
| 4       | T cell              | T.8Mem.Sp             |
| 4       | T cell              | CD8.CTR.LN            |
| 4       | T cell              | T.8Nve.LN             |
| 5       | Monocyte            | Mo.6+2-.BL            |
| 5       | Monocyte            | Mo.Lu                 |
| 5       | Monocyte            | Mo.6+2+.BL            |
| 5       | Monocyte            | Mo.6C+II-.Bl          |
| 5       | Monocyte            | Mo.6C-IIint.Bl        |
| 6       | B cell              | B.MZ.Sp               |
| 6       | B cell              | B.T2.Sp               |
| 6       | B cell              | CD19Control           |
| 6       | B cell              | B.Fo.Sp               |
| 6       | B cell              | B.GC.Sp               |
| 7       | NK cell             | NK.49H+.Sp            |
| 7       | NK cell             | NK.CD127-.Sp          |
| 7       | NK cell             | NK.CD49b+.Lv          |
| 7       | NK cell             | NK.b2m-.Sp            |
| 7       | NK cell             | NK.MCMV7.Sp           |
| 8       | DC                  | DC.11b+.AT.v2         |
| 8       | Macrophage          | MF.II+480lo.PC        |
| 8       | Macrophage          | MF.Thio5.II+480lo.PC  |
| 8       | DC                  | DC.103-11b+24+.Lu     |
| 8       | Macrophage          | MF.Thio5.II+480int.PC |

|               |                            |
|---------------|----------------------------|
| 9 DC          | DC.11b-.AT.v2              |
| 9 DC          | DC.103+11b-.Lu             |
| 9 DC          | DC.8+.Th                   |
| 9 DC          | DC.8-.Th                   |
| 9 DC          | DC.8+.Sp.ST                |
| 10 gd-T cell  | Tgd.vg4+24alo.e17.Th       |
| 10 gd-T cell  | Tgd.vg2+24alo.Th           |
| 10 NKT cell   | NKT.4+.Lv                  |
| 10 T cell     | T.4Eff49d+11a+.Sp.d8.LCM   |
| 10 T cell     | T.8Eff.Tbet-.Sp.OT1.d6LisO |
| 11 Pre-T cell | T.DPbl.Th                  |
| 11 Pre-B cell | proB.FrBC.FL               |
| 11 T cell     | T.DP.69-.e17.Th.v2         |
| 11 Pre-B cell | preB.FrC.BM                |
| 11 Pre-T cell | T.ISP.Th                   |
| 12 ILC-2      | ILC2.SI                    |
| 12 Treg       | ABD.TR.14w.B6              |
| 12 NKT cell   | NKT.4+.Lv                  |
| 12 T cell     | CD4.1h.LN                  |
| 12 gd-T cell  | Tgd.vg4+24alo.e17.Th       |
| 13 B cell     | B.MZ.Sp                    |
| 13 B cell     | B.Fo.Sp                    |
| 13 B cell     | CD19Control                |
| 13 B cell     | B.T2.Sp                    |
| 13 B cell     | B1a.PC                     |
| 14 Pre-T cell | T.DP.Th                    |
| 14 Pre-T cell | T.DPsm.Th                  |
| 14 Pre-T cell | T.DPbl.Th                  |
| 14 Pre-B cell | preB.FrD.BM                |
| 14 Pre-T cell | preT.DN3-4.Th              |
| 15 T cell     | T.4Eff49d+11a+.Sp.d8.LCM   |
| 15 T cell     | T.4Mem.Sp                  |
| 15 Treg       | LN.TR.14w.B6               |
| 15 T cell     | T.4Mem49d+11a+.Sp.d30.I    |
| 15 T cell     | T.4Mem44h62I.LN            |
| 16 DC         | DC.IIhilang+103+11blo.SLN  |
| 16 DC         | DC.IIhilang-103-11b+.SLN   |
| 16 DC         | DC.IIhilang-103-11blo.SLN  |
| 16 DC         | DC.IIhilang+103-11b+.SLN   |
| 16 DC         | DC.8-4-11b-.MLN            |
| 17 DC         | DC.8-.Th                   |
| 17 DC         | DC.11b-.AT.v2              |
| 17 DC         | DC.103+11b-.Lu             |
| 17 DC         | DC.103-11b+24+.Lu          |
| 17 DC         | DC.8+.Th                   |
| 18 Macrophage | MF.480hi.LV.Naive          |



|                    |                      |
|--------------------|----------------------|
| 18 Macrophage      | MF.103-11b+.Salm3.SI |
| 18 Macrophage      | MF.103-11b+.SI       |
| 18 Macrophage      | MF.11c-11b+.Lu       |
| 18 Macrophage      | MF.11cloSer.Salm3.SI |
| 19 Macrophage      | MF.II-480hi.PC       |
| 19 Macrophage      | MF.F480hi.ctrl.PC    |
| 19 Macrophage      | MF.F480hi.Gata6ko.PC |
| 19 Macrophage      | MF.Thio5.II-480hi.PC |
| 19 Macrophage      | MF.II+480lo.PC       |
| 20 DC              | DC.pDC.8-.Sp         |
| 20 DC              | DC.pDC.8+.SLN        |
| 20 DC              | DC.pDC.8+.Sp         |
| 20 DC              | DC.pDC.8+.MLN        |
| 20 Stem-Progenitor | SC.CDP.BM            |

| long_name                                                         | description  | identity_score |
|-------------------------------------------------------------------|--------------|----------------|
| Interstitial macrophages                                          | Phenotype ma | 814.509011     |
| Adipose Tissue Macrophage                                         | Phenotype ma | 750.201821     |
| Small Intestine Serosal Dendritic Cells                           | Phenotype ma | 602.405945     |
| F480hi Liver macrophage                                           | Phenotype ma | 554.188789     |
| Small Intestine Lamina Propria Cd103- Cd11b+ Dendritic Cells      | Phenotype ma | 540.488131     |
| Spleen Follicular B cells                                         | Phenotype ma | 344.355669     |
| T2 (Transitional)                                                 | Phenotype ma | 341.73764      |
| T3 (Transitional)                                                 | Phenotype ma | 335.231706     |
| Mesenteric Node B Cells                                           | Phenotype ma | 333.254271     |
| Splenic CD19+ B cells                                             | Phenotype ma | 328.008964     |
| Adipose Tissue CD11b- Dendritic Cells                             | Phenotype ma | 199.168104     |
| Lung CD103+ Dendritic Cells                                       | Phenotype ma | 163.625909     |
| Thymus Double Negative Dendritic Cell                             | Phenotype ma | 158.601883     |
| Lung Cd11b+24+ Dendritic Cells                                    | Phenotype ma | 158.255228     |
| Thymus CD8 Dendritic Cell                                         | Phenotype ma | 156.563314     |
| Interstitial macrophages                                          | Phenotype ma | 629.888259     |
| Adipose Tissue Macrophage                                         | Phenotype ma | 604.154423     |
| F4/80 high peritoneal macrophages from Gata6-/- mice              | Phenotype ma | 433.161191     |
| Peritoneal MF Thio-Elicited Day 5                                 | Phenotype ma | 414.168615     |
| Peritoneal MF Thio-Elicited Day 5                                 | Phenotype ma | 392.82001      |
| Naive CD8+ T cells 96 hours after in vitro aCD3-aCD28 stimulation | Phenotype ma | 354.299081     |
| Spleen OT1 tg Naive CD8                                           | Phenotype ma | 352.40576      |
| Spleen Memory-Phenotype CD8                                       | Phenotype ma | 350.210482     |
| Naive CD8+ T cells unstimulated control                           | Phenotype ma | 341.889987     |
| Subcutaneous LN Naive CD8                                         | Phenotype ma | 340.782279     |
| Blood Ly6C+MHCII+ monocytes                                       | Phenotype ma | 429.546694     |
| Lung monocytes                                                    | Phenotype ma | 416.970664     |
| Blood Ly6C+MHCII+ monocytes                                       | Phenotype ma | 414.763266     |
| Classical Monocytes, MHCII-                                       | Phenotype ma | 408.493934     |
| Nonclassical Monocytes, MHCIIint                                  | Phenotype ma | 381.220682     |
| MZ (Marginal Zone)                                                | Phenotype ma | 326.723623     |
| T2 (Transitional)                                                 | Phenotype ma | 323.807293     |
| Splenic CD19+ B cells                                             | Phenotype ma | 322.841957     |
| Spleen Follicular B cells                                         | Phenotype ma | 320.847058     |
| Germinal Center B cells, Spleen                                   | Phenotype ma | 318.575713     |
| Splenic NK Cells, Ly49H+ Subset                                   | Phenotype ma | 482.400476     |
| Natural Killer Cells (spleen)                                     | Phenotype ma | 482.082787     |
| Natural Killer Cells (liver)                                      | Phenotype ma | 476.939682     |
| Splenic Natural Killer Cells                                      | Phenotype ma | 473.223161     |
| Splenic Natural Killer Cells, Day 7 post-MCMV                     | Phenotype ma | 468.833491     |
| Adipose Tissue CD11b+ Dendritic Cells                             | Phenotype ma | 284.636791     |
| Peritoneal DC Steady State                                        | Phenotype ma | 263.026785     |
| Peritoneal MF Thio-Elicited Day 5                                 | Phenotype ma | 247.021478     |
| Lung Cd11b+24+ Dendritic Cells                                    | Phenotype ma | 216.616229     |
| Peritoneal MF Thio-Elicited Day 5                                 | Phenotype ma | 197.676473     |

|                                                                 |              |            |
|-----------------------------------------------------------------|--------------|------------|
| Adipose Tissue CD11b- Dendritic Cells                           | Phenotype ma | 313.921485 |
| Lung CD103+ Dendritic Cells                                     | Phenotype ma | 290.623894 |
| Thymus CD8 Dendritic Cell                                       | Phenotype ma | 284.600607 |
| Thymus Double Negative Dendritic Cell                           | Phenotype ma | 273.171159 |
| Spleen CD8+ Dendritic Cell                                      | Phenotype ma | 269.073256 |
| Thymus B6 E17 TCRgammadelta                                     | Phenotype ma | 338.219472 |
| Thymicvg2+, Mature                                              | Phenotype ma | 311.184715 |
| Liver Invariant iNKT CD4+                                       | Phenotype ma | 299.721825 |
| CD4+ effector T cells 8 days after LCMV infection               | Phenotype ma | 297.819427 |
| Spleen OT1 tg TbetKO CD8 d6 Listeria.OVA                        | Phenotype ma | 294.500842 |
| Double-Positive, Blasts                                         | Phenotype ma | 278.489404 |
| Fr. B/C (Pro-B)                                                 | Phenotype ma | 265.89386  |
| Thymus B6 E17 DP CD69-                                          | Phenotype ma | 263.485576 |
| Fr. Cprime (Cycling Pre-B)                                      | Phenotype ma | 262.275406 |
| Intermediate Single-Positive, CD3- CD8+                         | Phenotype ma | 248.205384 |
| Innate Lymphoid Cells - Type 2 (small intestine)                | Phenotype ma | 410.00357  |
| Fat tissue T regs                                               | Phenotype ma | 290.735305 |
| Liver Invariant iNKT CD4+                                       | Phenotype ma | 271.01483  |
| Naive CD4+ T cells 1 hour after in vitro aCD3-aCD28 stimulation | Phenotype ma | 268.375247 |
| Thymus B6 E17 TCRgammadelta                                     | Phenotype ma | 259.172664 |
| MZ (Marginal Zone)                                              | Phenotype ma | 291.758111 |
| Spleen Follicular B cells                                       | Phenotype ma | 285.412522 |
| Splenic CD19+ B cells                                           | Phenotype ma | 283.976787 |
| T2 (Transitional)                                               | Phenotype ma | 282.324493 |
| B-1a, Peritoneal Cavity                                         | Phenotype ma | 278.651631 |
| Double-Positive, All                                            | Phenotype ma | 204.247393 |
| Double-Positive, Small Resting                                  | Phenotype ma | 189.168231 |
| Double-Positive, Blasts                                         | Phenotype ma | 172.712502 |
| small pre-B population, Fr. D                                   | Phenotype ma | 171.075305 |
| DN3 to DN4 Transitional                                         | Phenotype ma | 165.62612  |
| CD4+ effector T cells 8 days after LCMV infection               | Phenotype ma | 363.774048 |
| Spleen Memory-Phenotype CD4                                     | Phenotype ma | 362.565161 |
| Lymph node T regs                                               | Phenotype ma | 354.219603 |
| CD4+ memory T cells 30 days after LCMV infection                | Phenotype ma | 350.795791 |
| Subcutaneous LN Memory-Phenotype CD4                            | Phenotype ma | 350.230311 |
| Skin Draining LN MHCIIhi Langerin+ CD103+ CD11blo Dendritic Cel | Phenotype ma | 684.219872 |
| Skin Draining LN MHCIIhi Langerin- CD103- CD11b+ Dendritic Cell | Phenotype ma | 656.546175 |
| Skin Draining LN MHCIIhi Langerin- CD103- CD11b- Dendritic Cell | Phenotype ma | 619.669387 |
| Skin Draining LN MHCIIhi Langerin+ CD103- CD11b+ Dendritic Cell | Phenotype ma | 596.401262 |
| Mesenteric LN Triple Negative Dendritic Cell                    | Phenotype ma | 596.257869 |
| Thymus Double Negative Dendritic Cell                           | Phenotype ma | 249.19769  |
| Adipose Tissue CD11b- Dendritic Cells                           | Phenotype ma | 246.789006 |
| Lung CD103+ Dendritic Cells                                     | Phenotype ma | 242.592988 |
| Lung Cd11b+24+ Dendritic Cells                                  | Phenotype ma | 241.895598 |
| Thymus CD8 Dendritic Cell                                       | Phenotype ma | 228.471866 |
| F480hi Liver macrophage                                         | Phenotype ma | 536.625045 |

|                                                                     |              |            |
|---------------------------------------------------------------------|--------------|------------|
| Small Intestine Cd103-Cd11b+ Dendritic Cells Isolated From Mice I   | Phenotype ma | 533.697473 |
| Small Intestine Lamina Propria Cd103- Cd11b+ Dendritic Cells        | Phenotype ma | 533.474308 |
| Interstitial macrophages                                            | Phenotype ma | 530.616236 |
| Small Intestine Serosal Dendritic Cells Isolated From Mice Infected | Phenotype ma | 496.913578 |
| Peritoneal MF Steady State                                          | Phenotype ma | 876.33232  |
| F4/80 high peritoneal macrophages from WT mice (control)            | Phenotype ma | 818.28021  |
| F4/80 high peritoneal macrophages from Gata6 <sup>-/-</sup> mice    | Phenotype ma | 761.134768 |
| Peritoneal MF Thio-Elicited Day 5                                   | Phenotype ma | 736.955812 |
| Peritoneal DC Steady State                                          | Phenotype ma | 433.763833 |
| Spleen CD8- Plasmacytoid Dendritic Cell                             | Phenotype ma | 675.739821 |
| Skin Draining LN Cd8+ Plasmacytoid Dendritic Cell                   | Phenotype ma | 672.566681 |
| Spleen CD8+ Plasmacytoid Dendritic Cell                             | Phenotype ma | 672.22247  |
| Mesenteric LN Cd8+ Plasmacytoid Dendritic Cell                      | Phenotype ma | 660.713324 |
| Common DC Precursors (CDP)                                          | Phenotype ma | 275.972331 |

| index | z_score    | percent_pos_correlation |
|-------|------------|-------------------------|
| 1     | 3.92081489 | 85.0980392              |
| 2     | 3.61125835 | 84.5098039              |
| 3     | 2.89981101 | 84.3137255              |
| 4     | 2.66770732 | 81.1764706              |
| 5     | 2.60175625 | 80.7843137              |
| 6     | 1.73715741 | 78.3861672              |
| 7     | 1.72395035 | 74.9279539              |
| 8     | 1.69113012 | 77.5216138              |
| 9     | 1.68115463 | 80.9798271              |
| 10    | 1.65469384 | 78.6743516              |
| 11    | 4.11905805 | 80.5970149              |
| 12    | 3.38399876 | 79.4776119              |
| 13    | 3.28009531 | 76.4925373              |
| 14    | 3.27292603 | 77.6119403              |
| 15    | 3.23793502 | 76.119403               |
| 16    | 4.18979434 | 80.9411765              |
| 17    | 4.01862195 | 78.8235294              |
| 18    | 2.88123533 | 69.8823529              |
| 19    | 2.75490342 | 71.2941177              |
| 20    | 2.61290003 | 67.5294118              |
| 21    | 1.31776715 | 83.6898396              |
| 22    | 1.3107252  | 87.7005348              |
| 23    | 1.30256017 | 88.2352941              |
| 24    | 1.27161322 | 83.1550802              |
| 25    | 1.26749325 | 88.5026738              |
| 26    | 3.48890442 | 87.4686717              |
| 27    | 3.38675822 | 84.4611529              |
| 28    | 3.36882908 | 85.4636592              |
| 29    | 3.31790772 | 85.9649123              |
| 30    | 3.09638635 | 84.4611529              |
| 31    | 2.03224506 | 86.0526316              |
| 32    | 2.01410527 | 71.5789474              |
| 33    | 2.00810081 | 78.4210526              |
| 34    | 1.99569239 | 77.8947368              |
| 35    | 1.98156445 | 81.0526316              |
| 36    | 1.74771221 | 84.4736842              |
| 37    | 1.74656123 | 82.1052632              |
| 38    | 1.72792803 | 82.3684211              |
| 39    | 1.71446326 | 76.5789474              |
| 40    | 1.69855971 | 81.3157895              |
| 41    | 3.77326234 | 83.7545126              |
| 42    | 3.48679121 | 83.032491               |
| 43    | 3.27461828 | 80.5054152              |
| 44    | 2.8715538  | 74.3682311              |
| 45    | 2.62048061 | 78.3393502              |

|    |            |            |
|----|------------|------------|
| 46 | 5.05820561 | 81.626506  |
| 47 | 4.68281237 | 80.7228916 |
| 48 | 4.58575935 | 81.0240964 |
| 49 | 4.40159707 | 81.0240964 |
| 50 | 4.33556771 | 81.9277108 |
| 51 | 1.41630962 | 77.1084337 |
| 52 | 1.30310033 | 79.8192771 |
| 53 | 1.25509895 | 73.7951807 |
| 54 | 1.24713257 | 73.1927711 |
| 55 | 1.23323584 | 72.2891566 |
| 56 | 2.70268343 | 78.0564263 |
| 57 | 2.58044621 | 85.5799373 |
| 58 | 2.5570743  | 78.6833856 |
| 59 | 2.54532985 | 82.1316614 |
| 60 | 2.40878313 | 82.4451411 |
| 61 | 1.94393996 | 82.1882952 |
| 62 | 1.37845623 | 67.1755725 |
| 63 | 1.28495603 | 68.4478372 |
| 64 | 1.27244103 | 73.0279898 |
| 65 | 1.22880905 | 69.2111959 |
| 66 | 1.93969562 | 82.8402367 |
| 67 | 1.89750824 | 76.6272189 |
| 68 | 1.88796304 | 76.6272189 |
| 69 | 1.87697809 | 71.0059172 |
| 70 | 1.85255981 | 78.6982249 |
| 71 | 1.54388514 | 68.707483  |
| 72 | 1.42990329 | 66.6666667 |
| 73 | 1.30551612 | 65.0793651 |
| 74 | 1.29314072 | 62.8117914 |
| 75 | 1.25195089 | 58.276644  |
| 76 | 1.53318915 | 79.8270893 |
| 77 | 1.52809408 | 87.8962536 |
| 78 | 1.49292027 | 86.167147  |
| 79 | 1.47849002 | 77.8097983 |
| 80 | 1.47610671 | 85.3025937 |
| 81 | 5.2752908  | 90.5405405 |
| 82 | 5.06192839 | 88.2882883 |
| 83 | 4.77761075 | 87.6126126 |
| 84 | 4.59821501 | 85.1351351 |
| 85 | 4.59710947 | 89.6396396 |
| 86 | 3.47777978 | 83.423913  |
| 87 | 3.44416441 | 79.076087  |
| 88 | 3.38560518 | 80.7065217 |
| 89 | 3.37587247 | 79.3478261 |
| 90 | 3.18853211 | 82.6086957 |
| 91 | 2.84055713 | 84.952381  |

|     |            |            |
|-----|------------|------------|
| 92  | 2.8250604  | 85.9047619 |
| 93  | 2.8238791  | 85.9047619 |
| 94  | 2.80875026 | 82.2857143 |
| 95  | 2.63034948 | 86.6666667 |
| 96  | 5.06102077 | 93.7694704 |
| 97  | 4.72575648 | 88.7850467 |
| 98  | 4.3957284  | 88.7850467 |
| 99  | 4.25608937 | 89.4080997 |
| 100 | 2.50508593 | 86.2928349 |
| 101 | 5.74920384 | 88.4135472 |
| 102 | 5.72220672 | 85.2049911 |
| 103 | 5.71927817 | 88.2352941 |
| 104 | 5.62135819 | 83.9572193 |
| 105 | 2.34797645 | 76.114082  |
